# Supplementary material for: Integrative phenotyping approaches to unmask the Phyb-PIF4 pathway in Arabidopsis thaliana reproductive organs at high ambient temperatures
Source: Research Square preprint supplement (doi:10.21203/rs.3.rs-4223427/v1), 2024-04-15

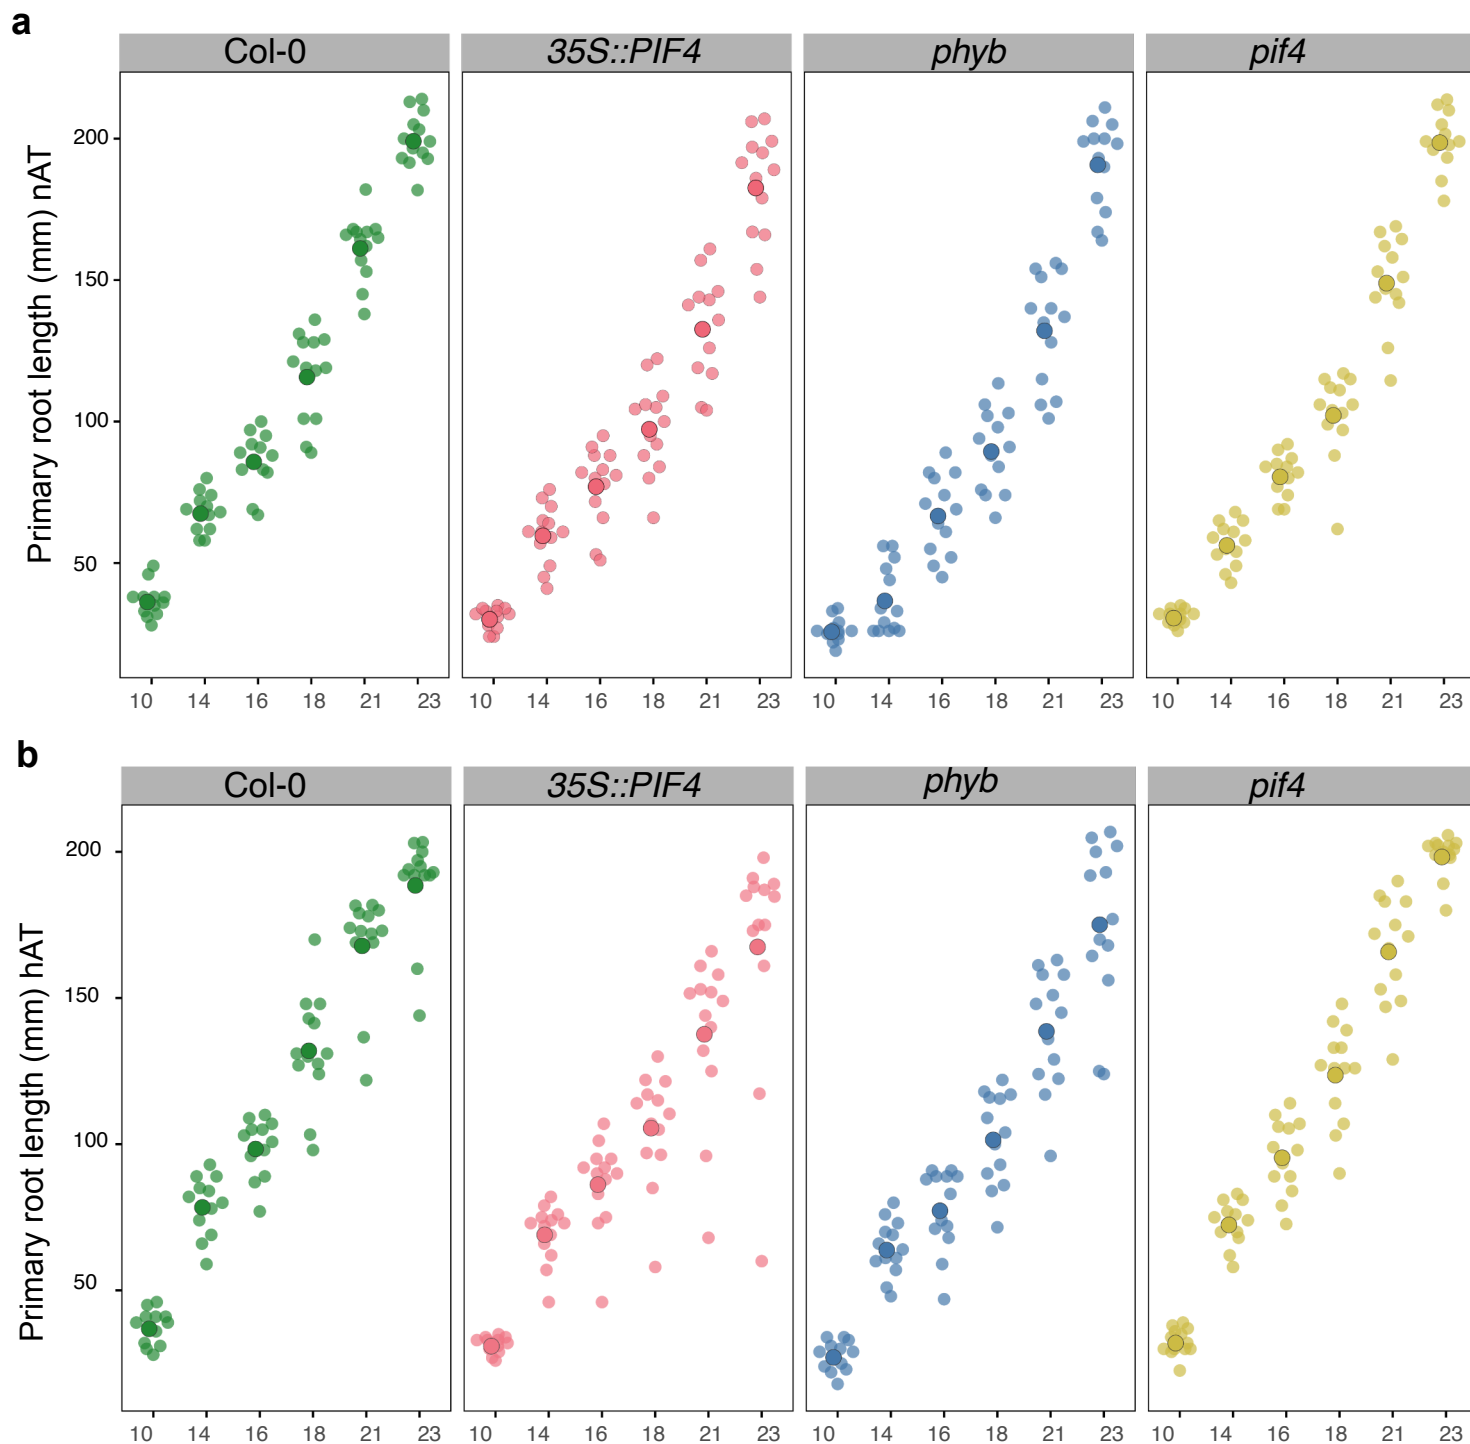

### Additional File 1 – Figure S1. Primary root length per genotype

Time series of primary root length per genotype for seedlings grown in nAT (**a**) and hAT (**b**). Days after sowing are indicated in the x-axis. The root length is indicated as mm.  $n = 13$  plants per genotype. Data source is provided in Additional File 3 – Tables S1 and S2.

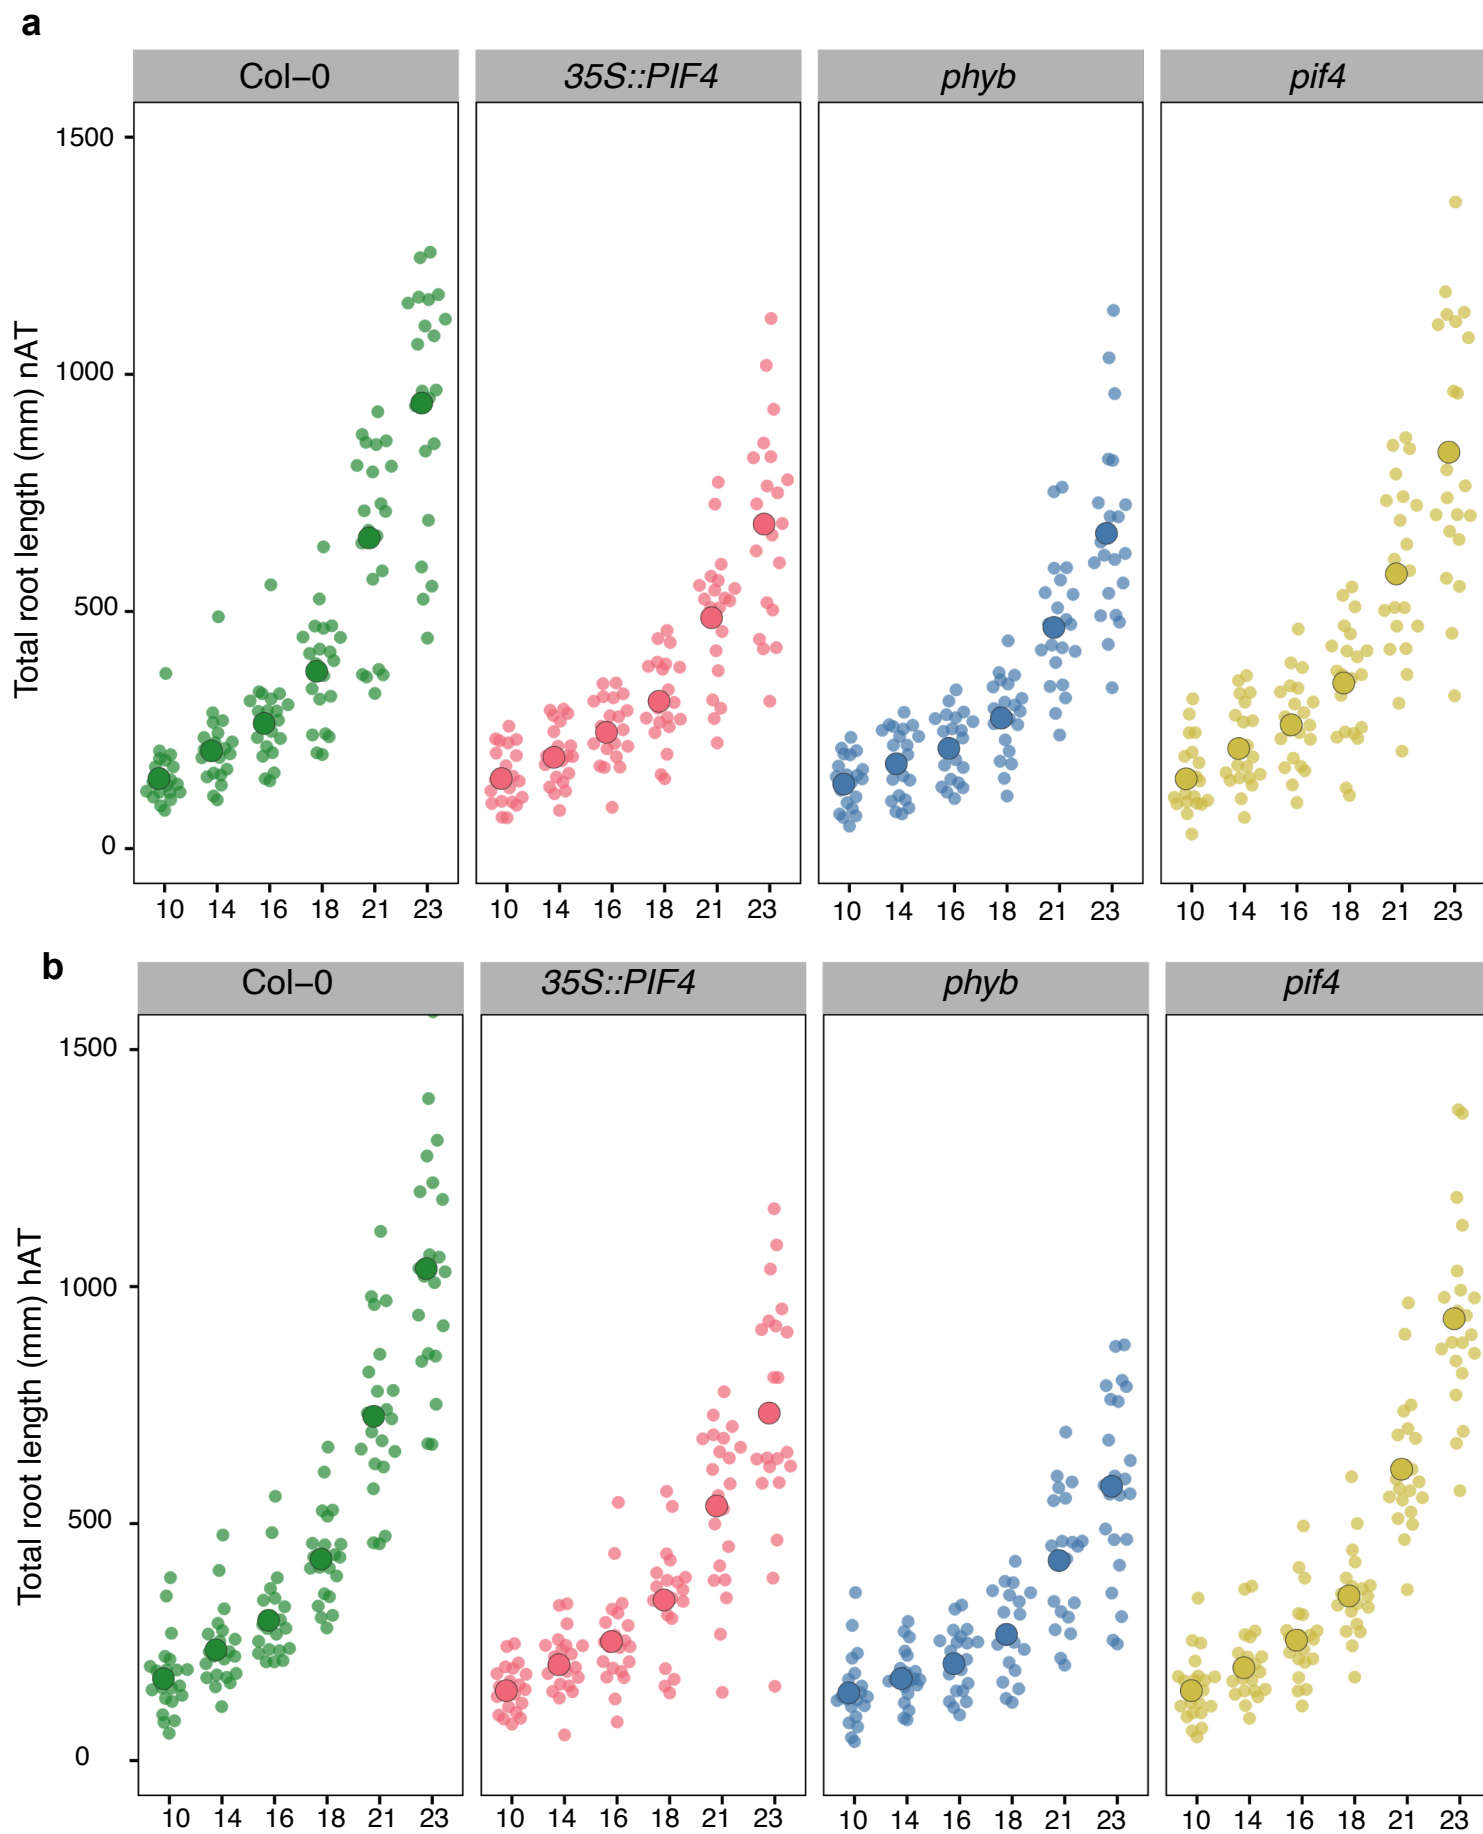

### Additional File 1 - Figure S2. Total root length per genotype

Time series of the total root length per genotype for seedlings grown in nAT (**a**) and hAT (**b**). Days after sowing are indicated in the x-axis. The root length is indicated as mm. n = 13 plants per genotype. Data source is provided in Additional File 3 – Tables S1 and S2.

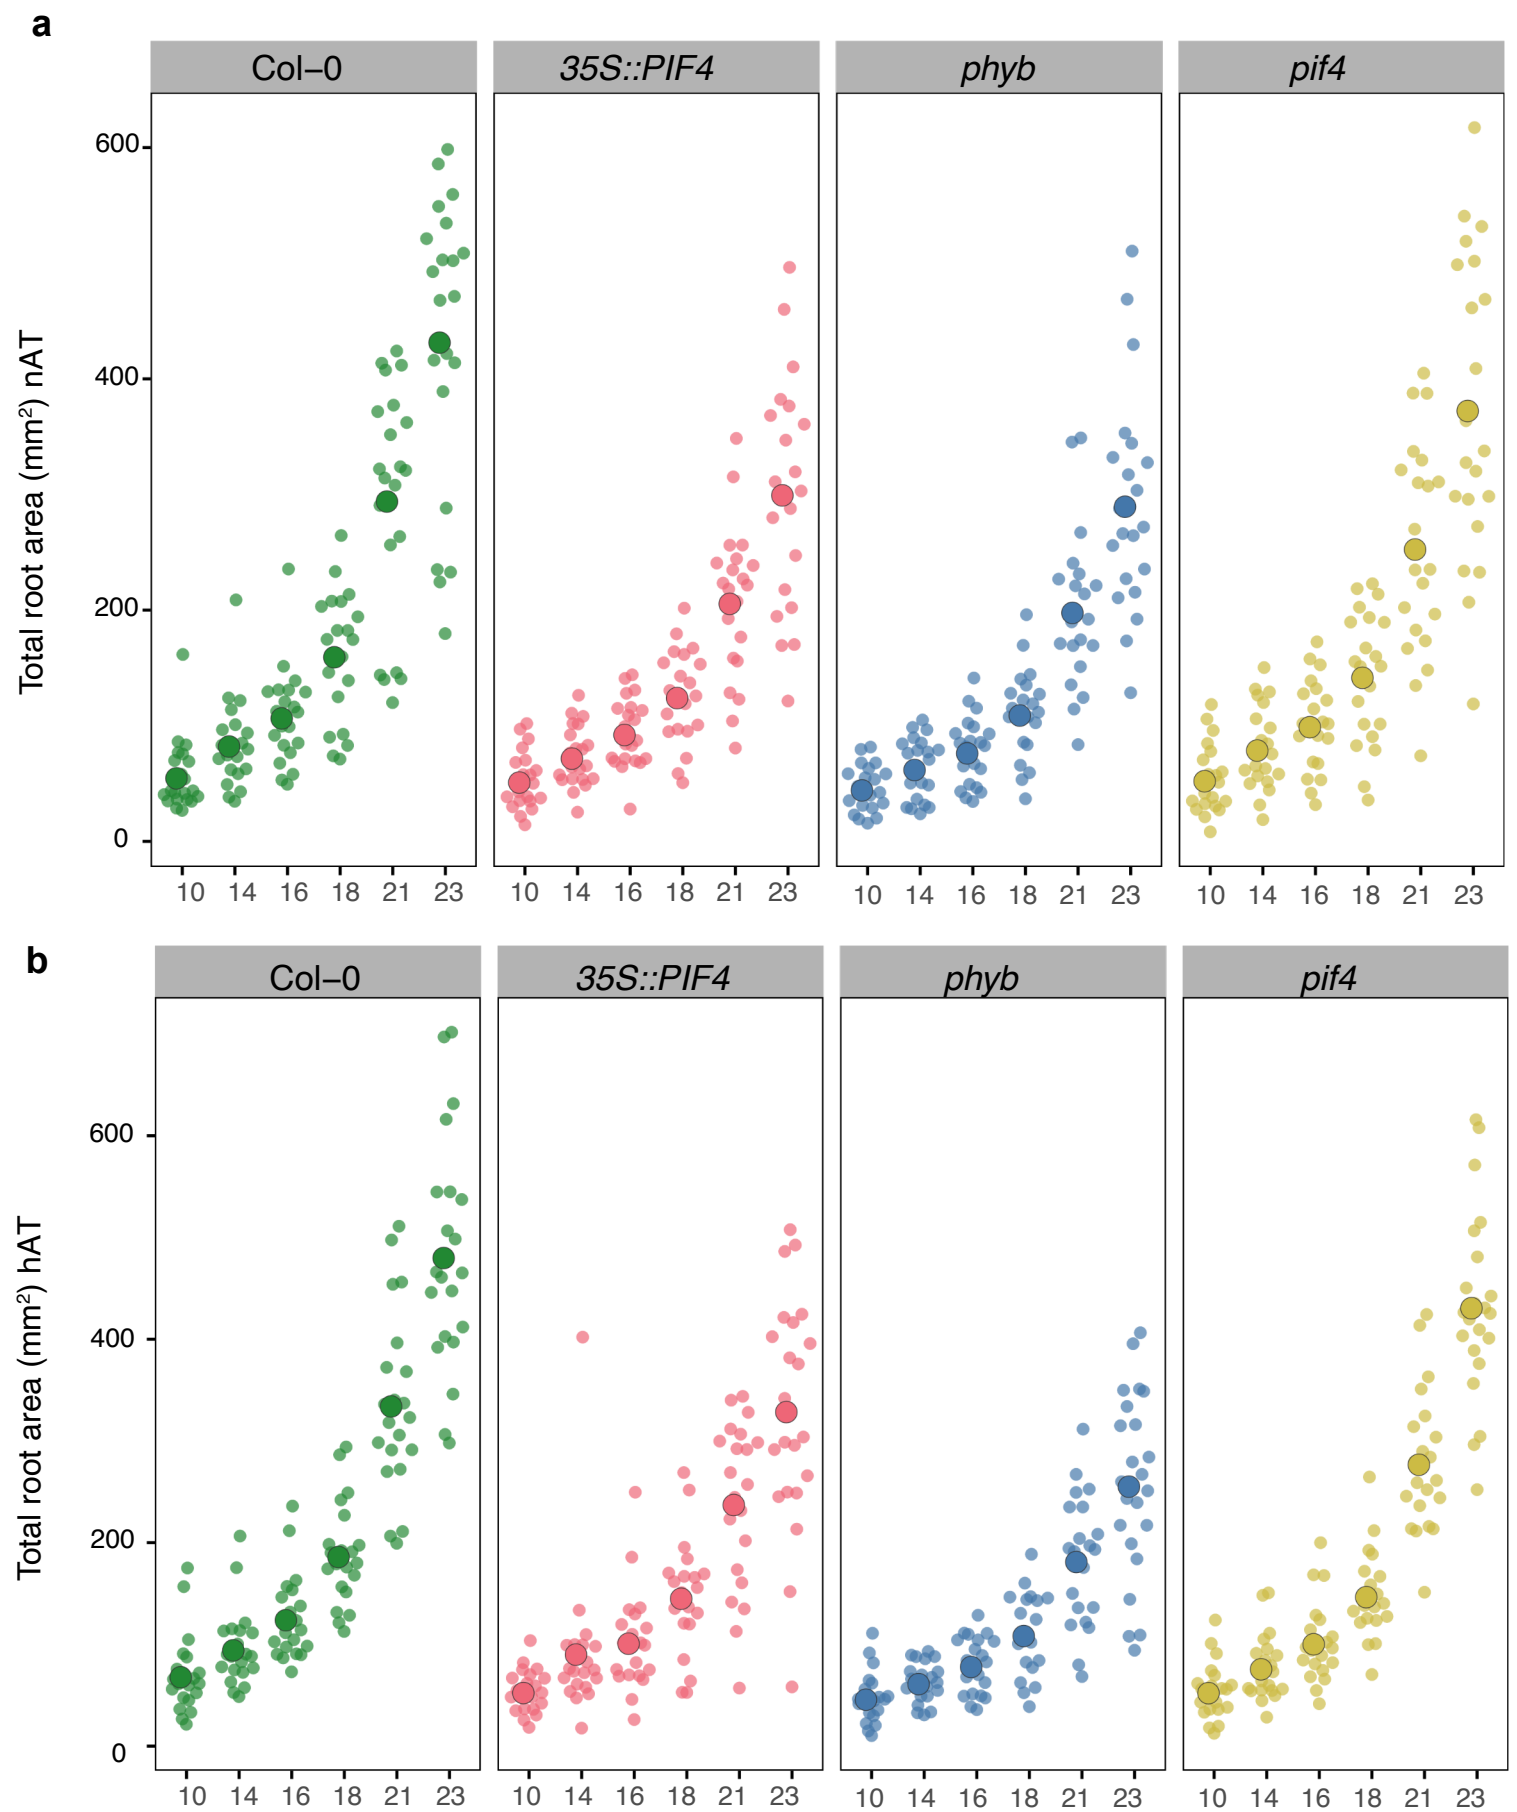

**Additional File 1 - Figure S3. Total root area per genotype**

Time series of the total root area per genotypes for seedlings grown in nAT (**a**) and hAT (**b**). Days after sowing are indicated in the x-axis. The root length is indicated as mm. n = 13 plants per genotype. Data source is provided in Additional File 3 – Tables S1 and S2.

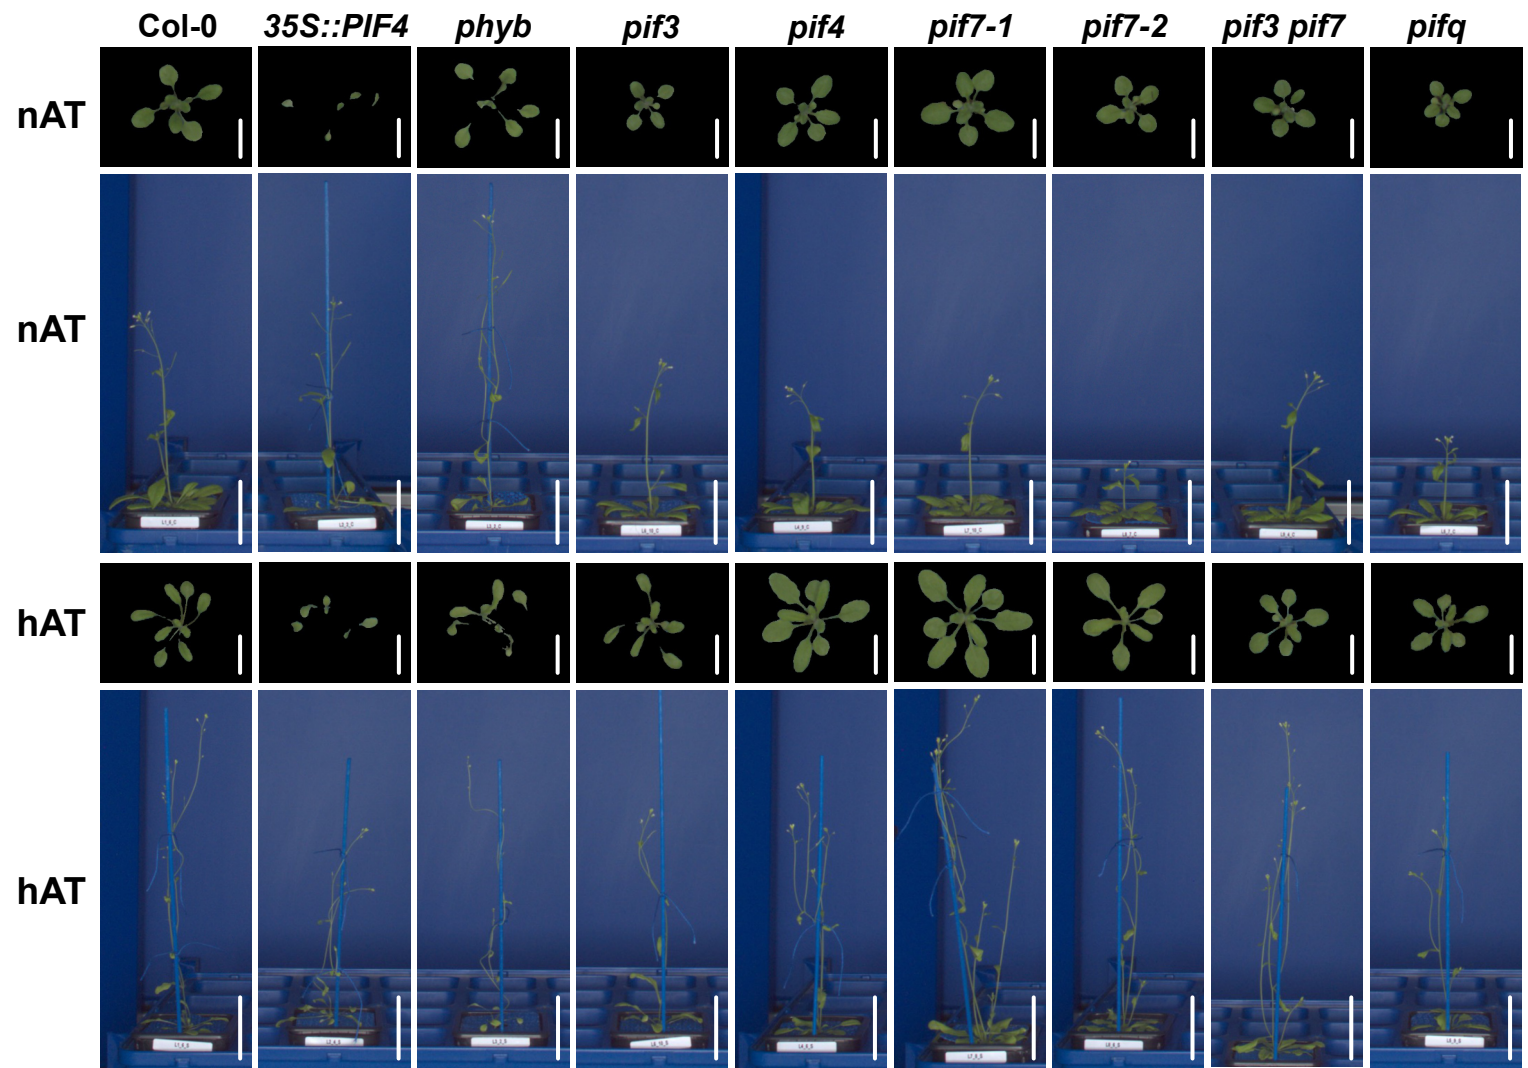

**Additional file 1. Figure S4. Photos of the seedlings and flowering plants from the automated phenotyping**

Photographs of seedlings and plants from Col-0, 35S::PIF4, *phyb*, *pif3*, *pif4*, *pif7-1*, *pif7-2*, *pif3 pif7*, and *pifq* grown at nAT and hAT. Plants were photographed at 20 days after sowing (top view) and 32 days after sowing for nAT and 30 days after sowing for hAT (side view). Scale bars are 2 cm for top views and 5 cm for side view.

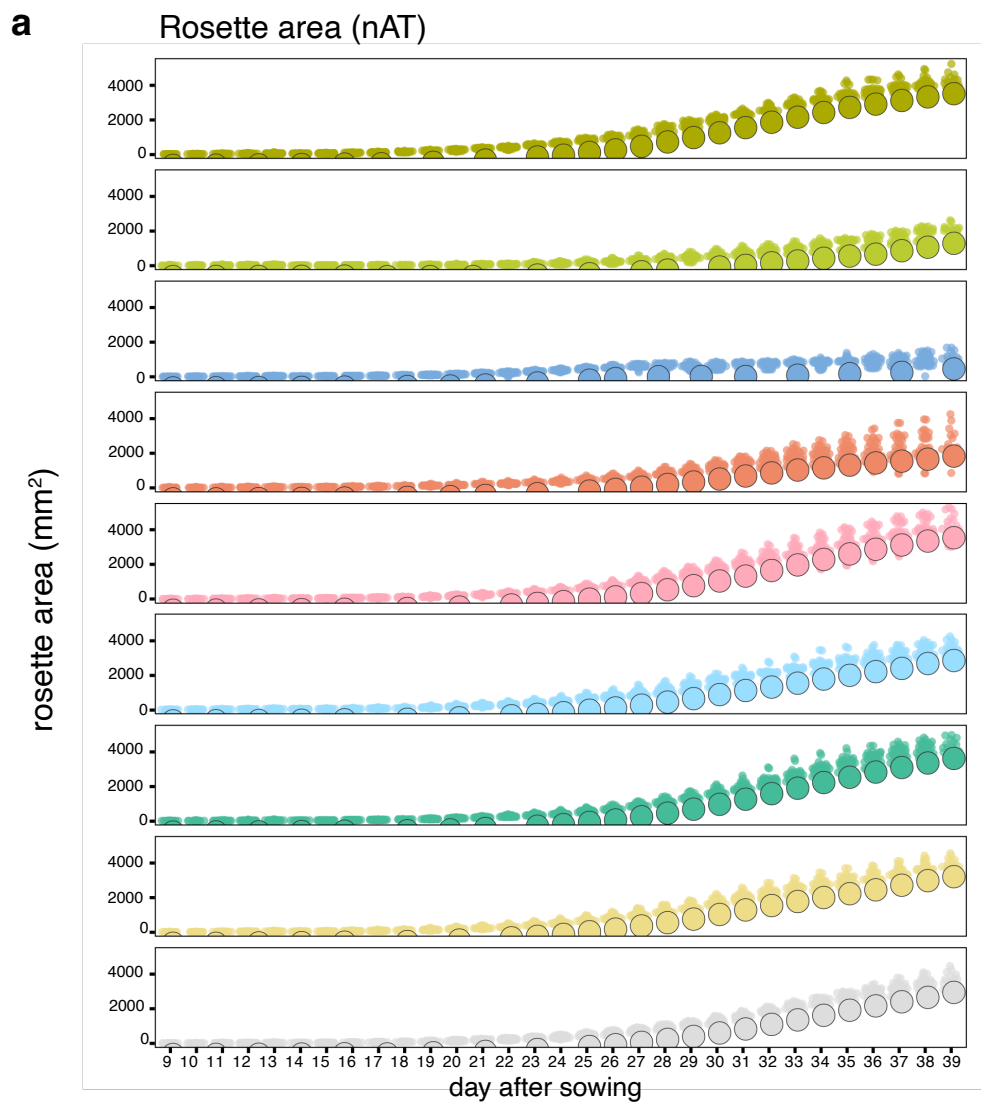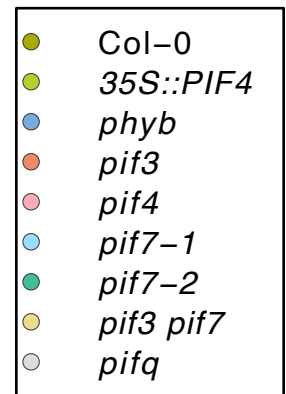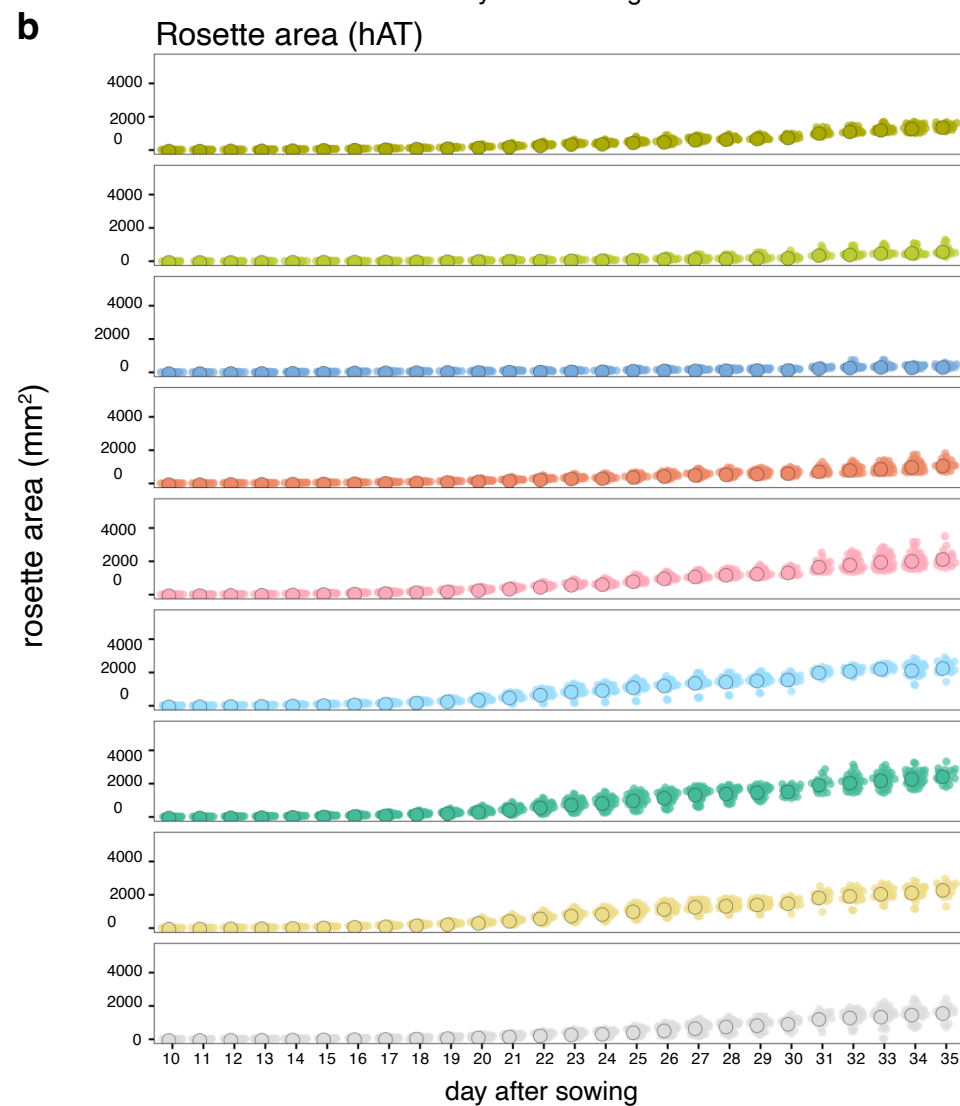

**Additional File 1 - Figure S5.**

**Rosette area per genotype.**

Relates to Figure 2.

Time series of the rosette area per genotypes for seedlings grown in nAT (**a**) and hAT (**b**). Days after sowing are indicated in the x-axis. Data source is provided in Additional File 3 – Tables S4 and S5.



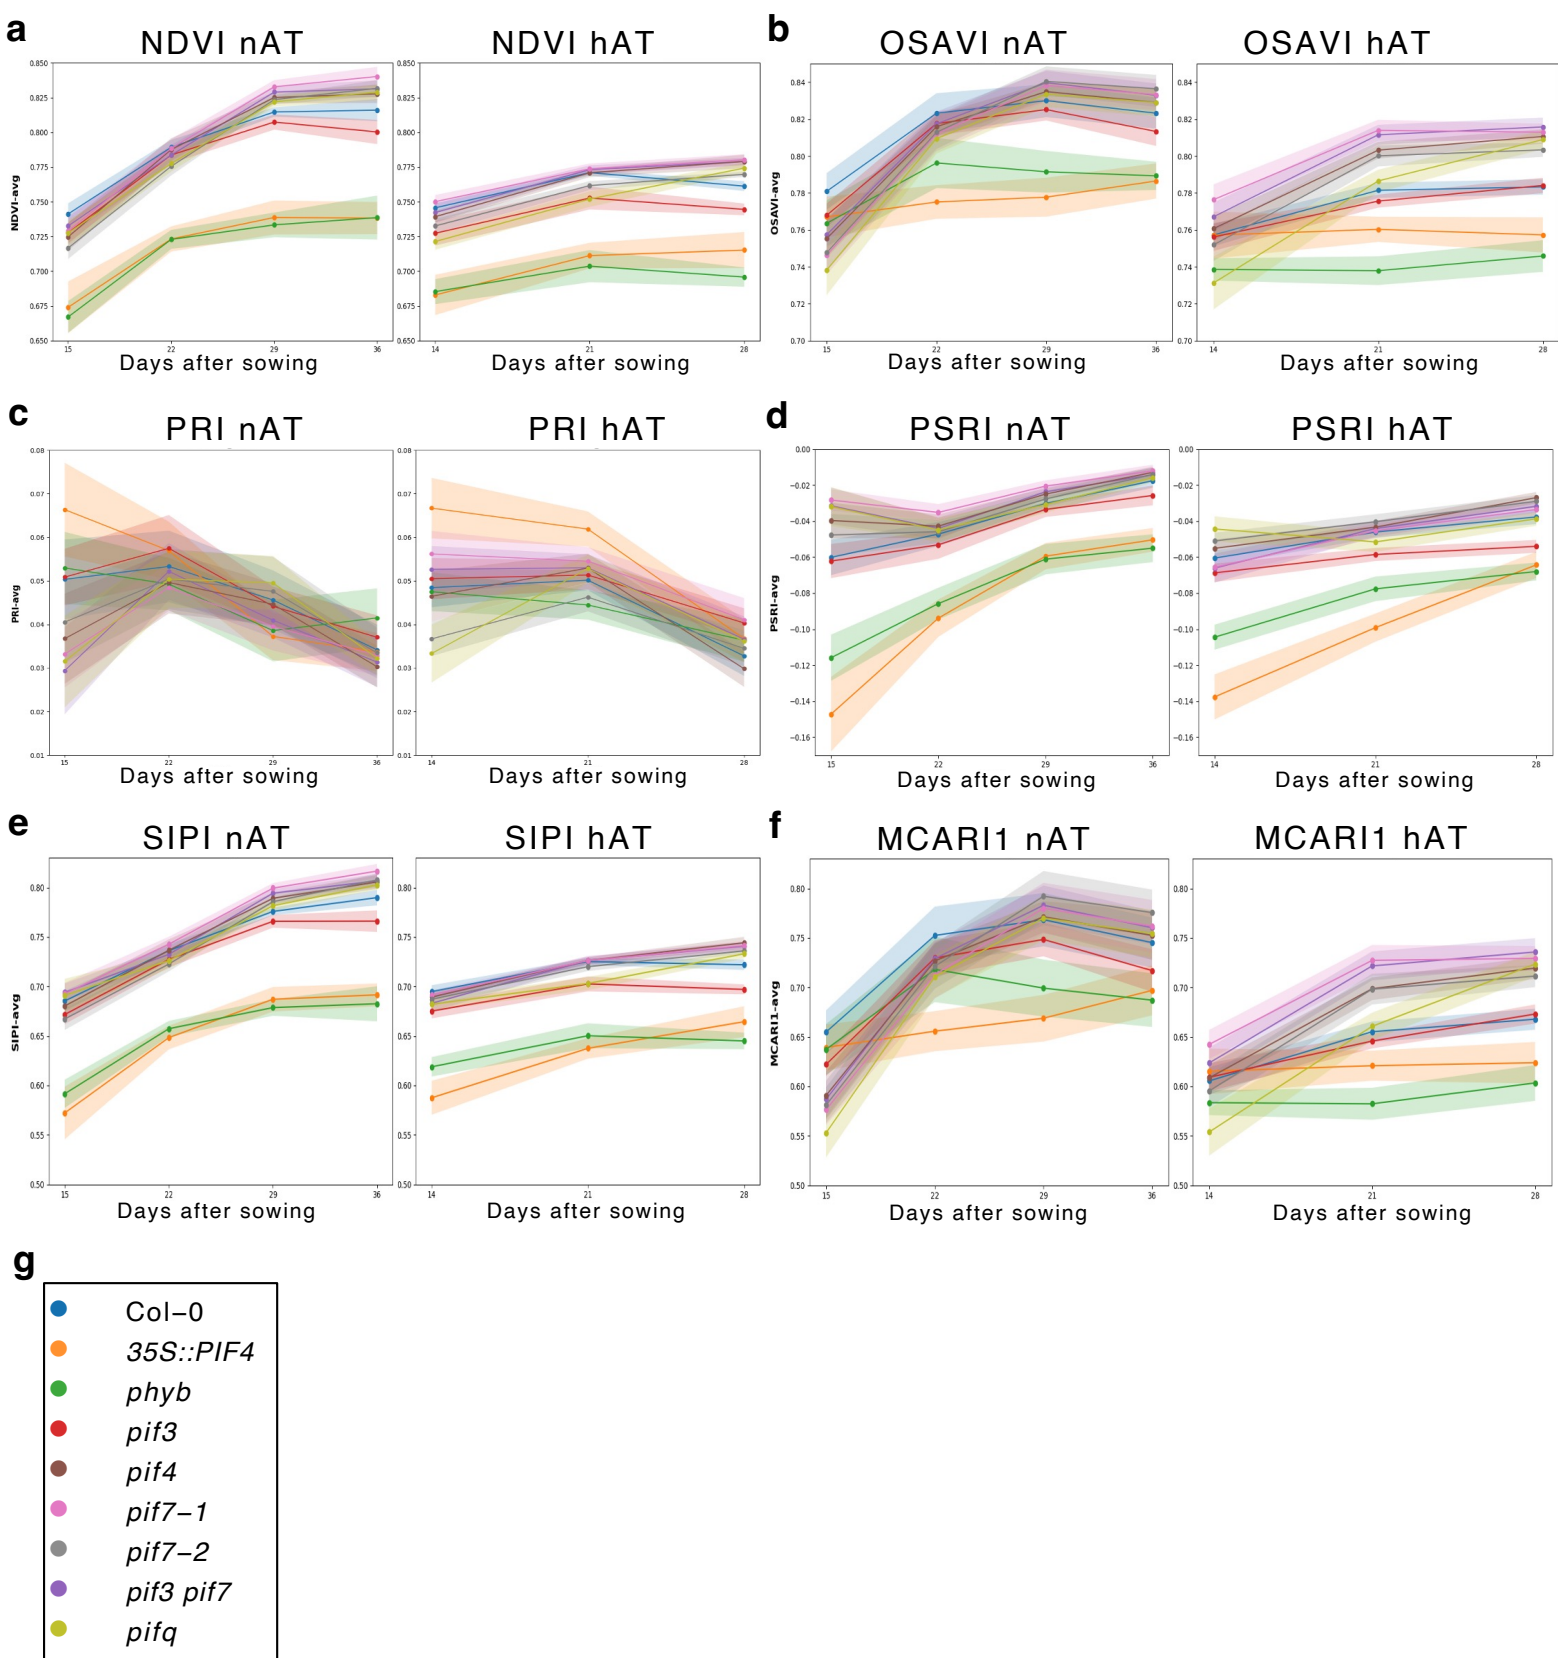

### Additional File 1 - Figure S6. VNIR parameters

Graphs depicting the averaged measurements of (a) NDVI-avg, (b) OSAVI, (c) PRI, (d) PSRI, (e) MCARI1, and (f) SIPI, ranging from 15 days to 36 after sowing for nAT (left) and 14 to 28 after sowing for hAT (right). (g) The color legend for the genotypes is the same for all the graphs. The averaged values with a 95% confidence interval (shadow) are depicted. Data source are provided in Additional File 3 - Table S6.

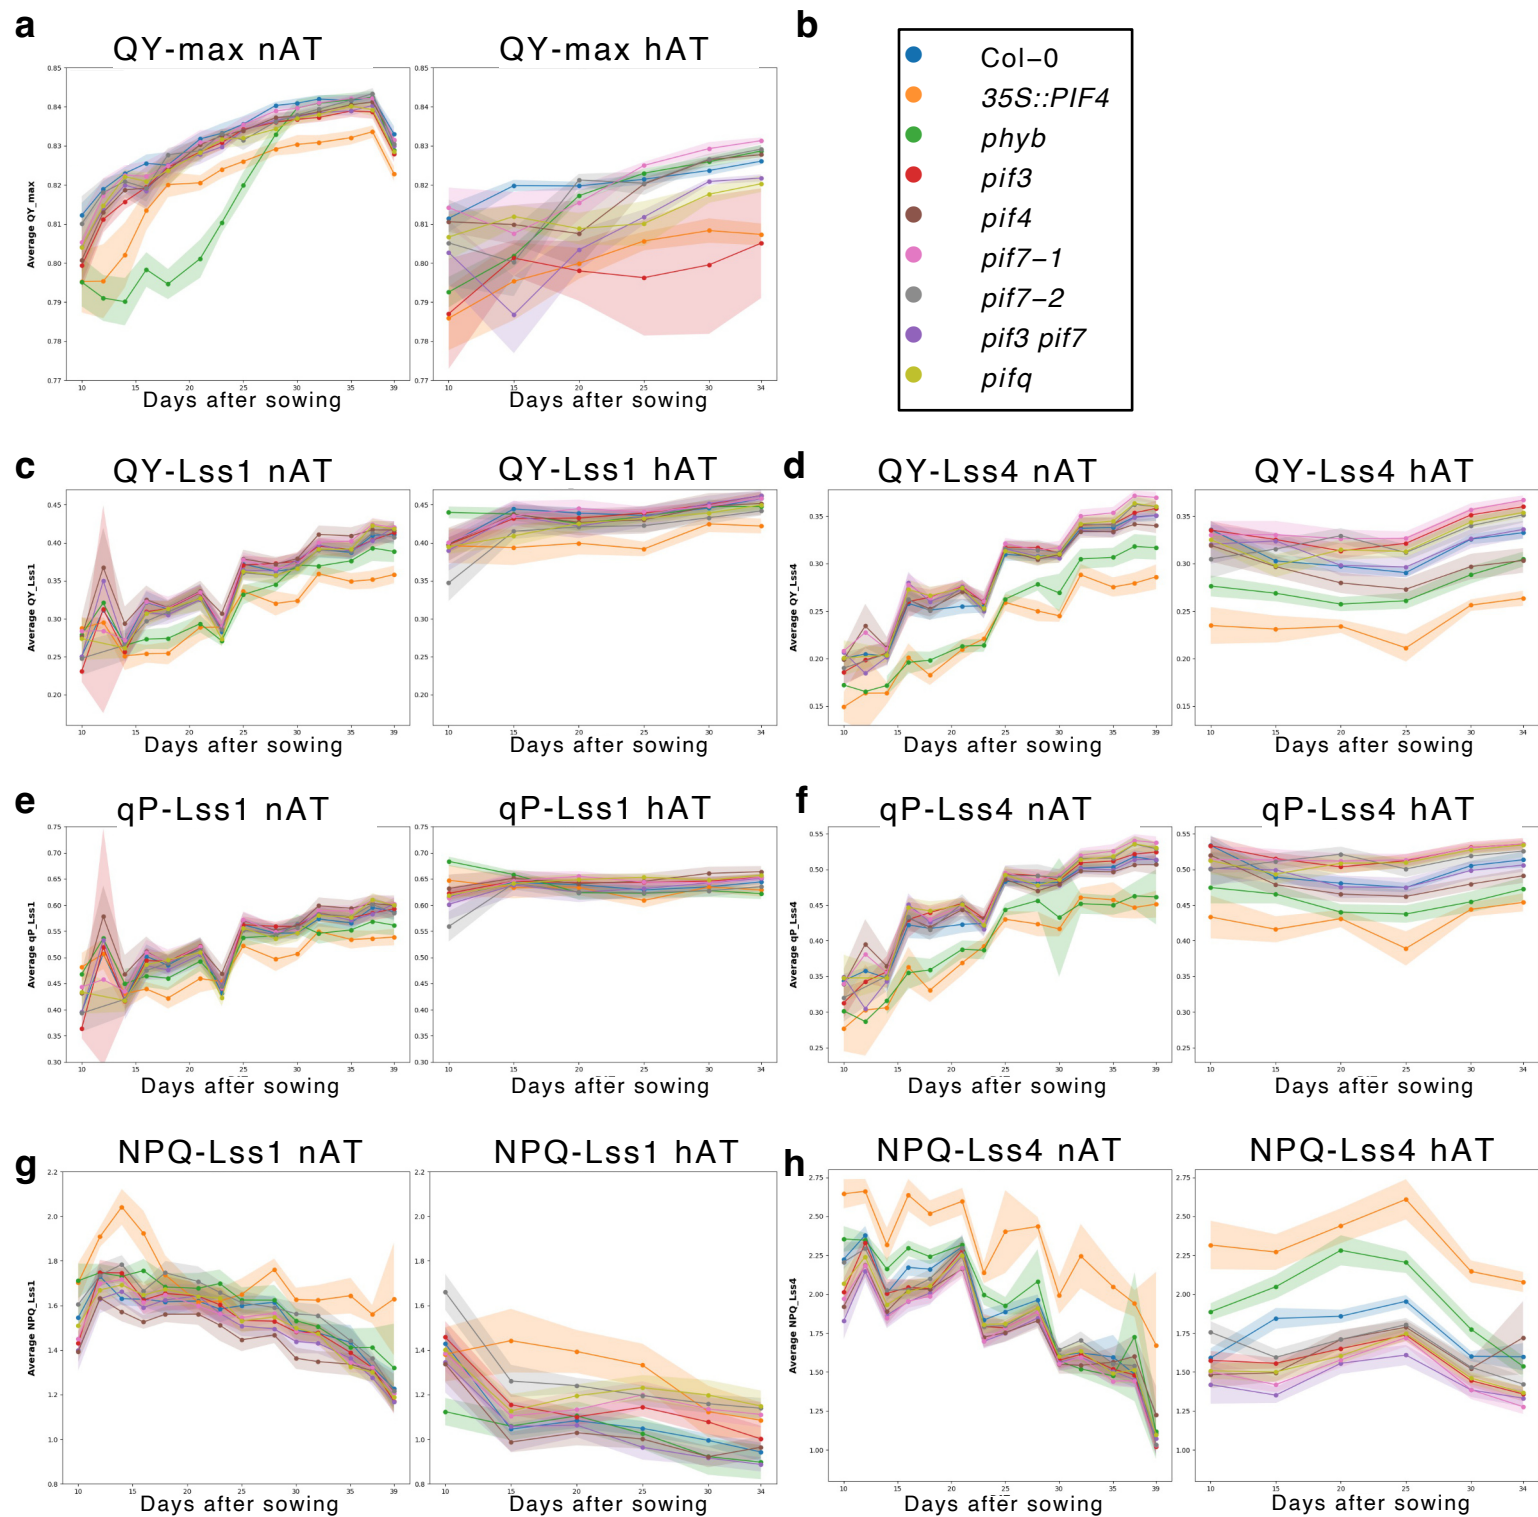

### Additional File 1 - Figure S7. Photosynthetic performance

Measurements of QY-max (**a**), QY-Lss1 (**c**), QY-Lss4 (**d**), qP-Lss1 (**e**), qP-Lss4 (**f**), NPQ-Lss1 (**g**), and NPQ-Lss4 (**h**) at nAT (left) and hAT (right), ranging from 10 days to 39 days after sowing for nAT and up to 32 days for hAT. (**b**) The color legend for the genotypes is the same for all the graphs. The averaged values with a 95% confidence interval (shadow) are depicted. Data source are provided in Additional File 3 - Table S7.

**a**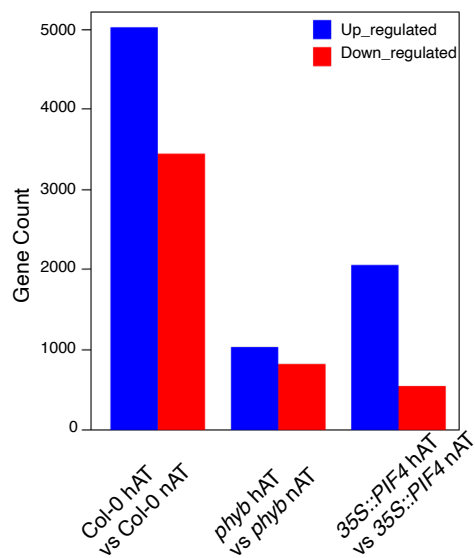**b**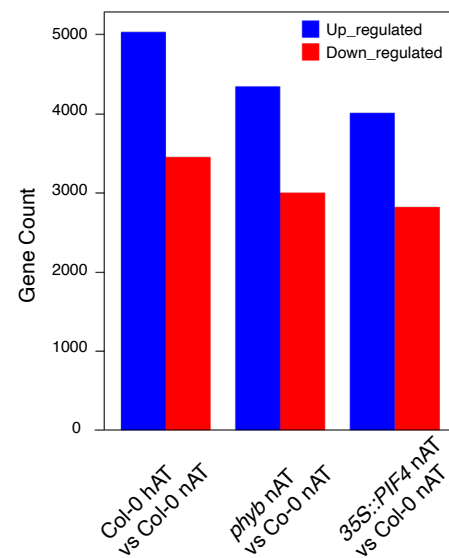**c**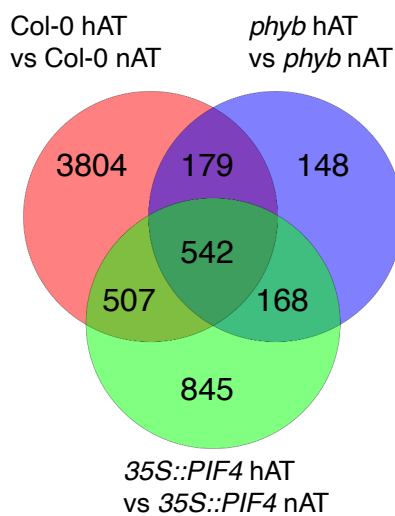**d**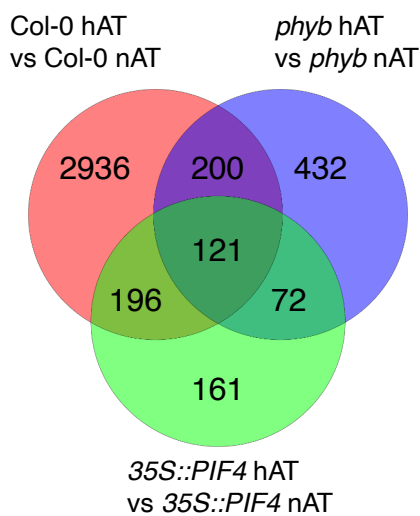**e**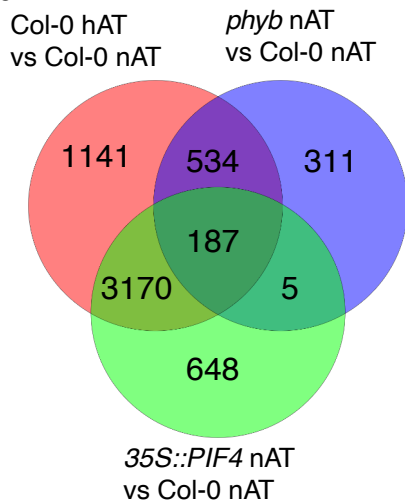**f**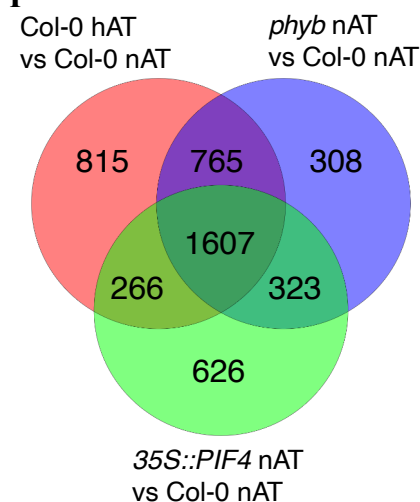

### Additional File 1 - Figure S8. DEG and VENN diagrams of the RNAseq experiment.

(a) Number of up- and downregulated genes in each genotype, comparing hAT to nAT. (b) Number of up- and downregulated genes in Col-0 at hAT and *phyb* and 35S::PIF4 at nAT, normalised to genes expressed in Col-0 pistils at nAT. (c-f) Venn diagrams comparing the upregulated (c, e) and downregulated (d, f) genes in each genotype comparing hAT to nAT (c, d) and comparing the response to hAT in Col-0 to the response in *phyb* and 35S::PIF4 pistils at nAT.



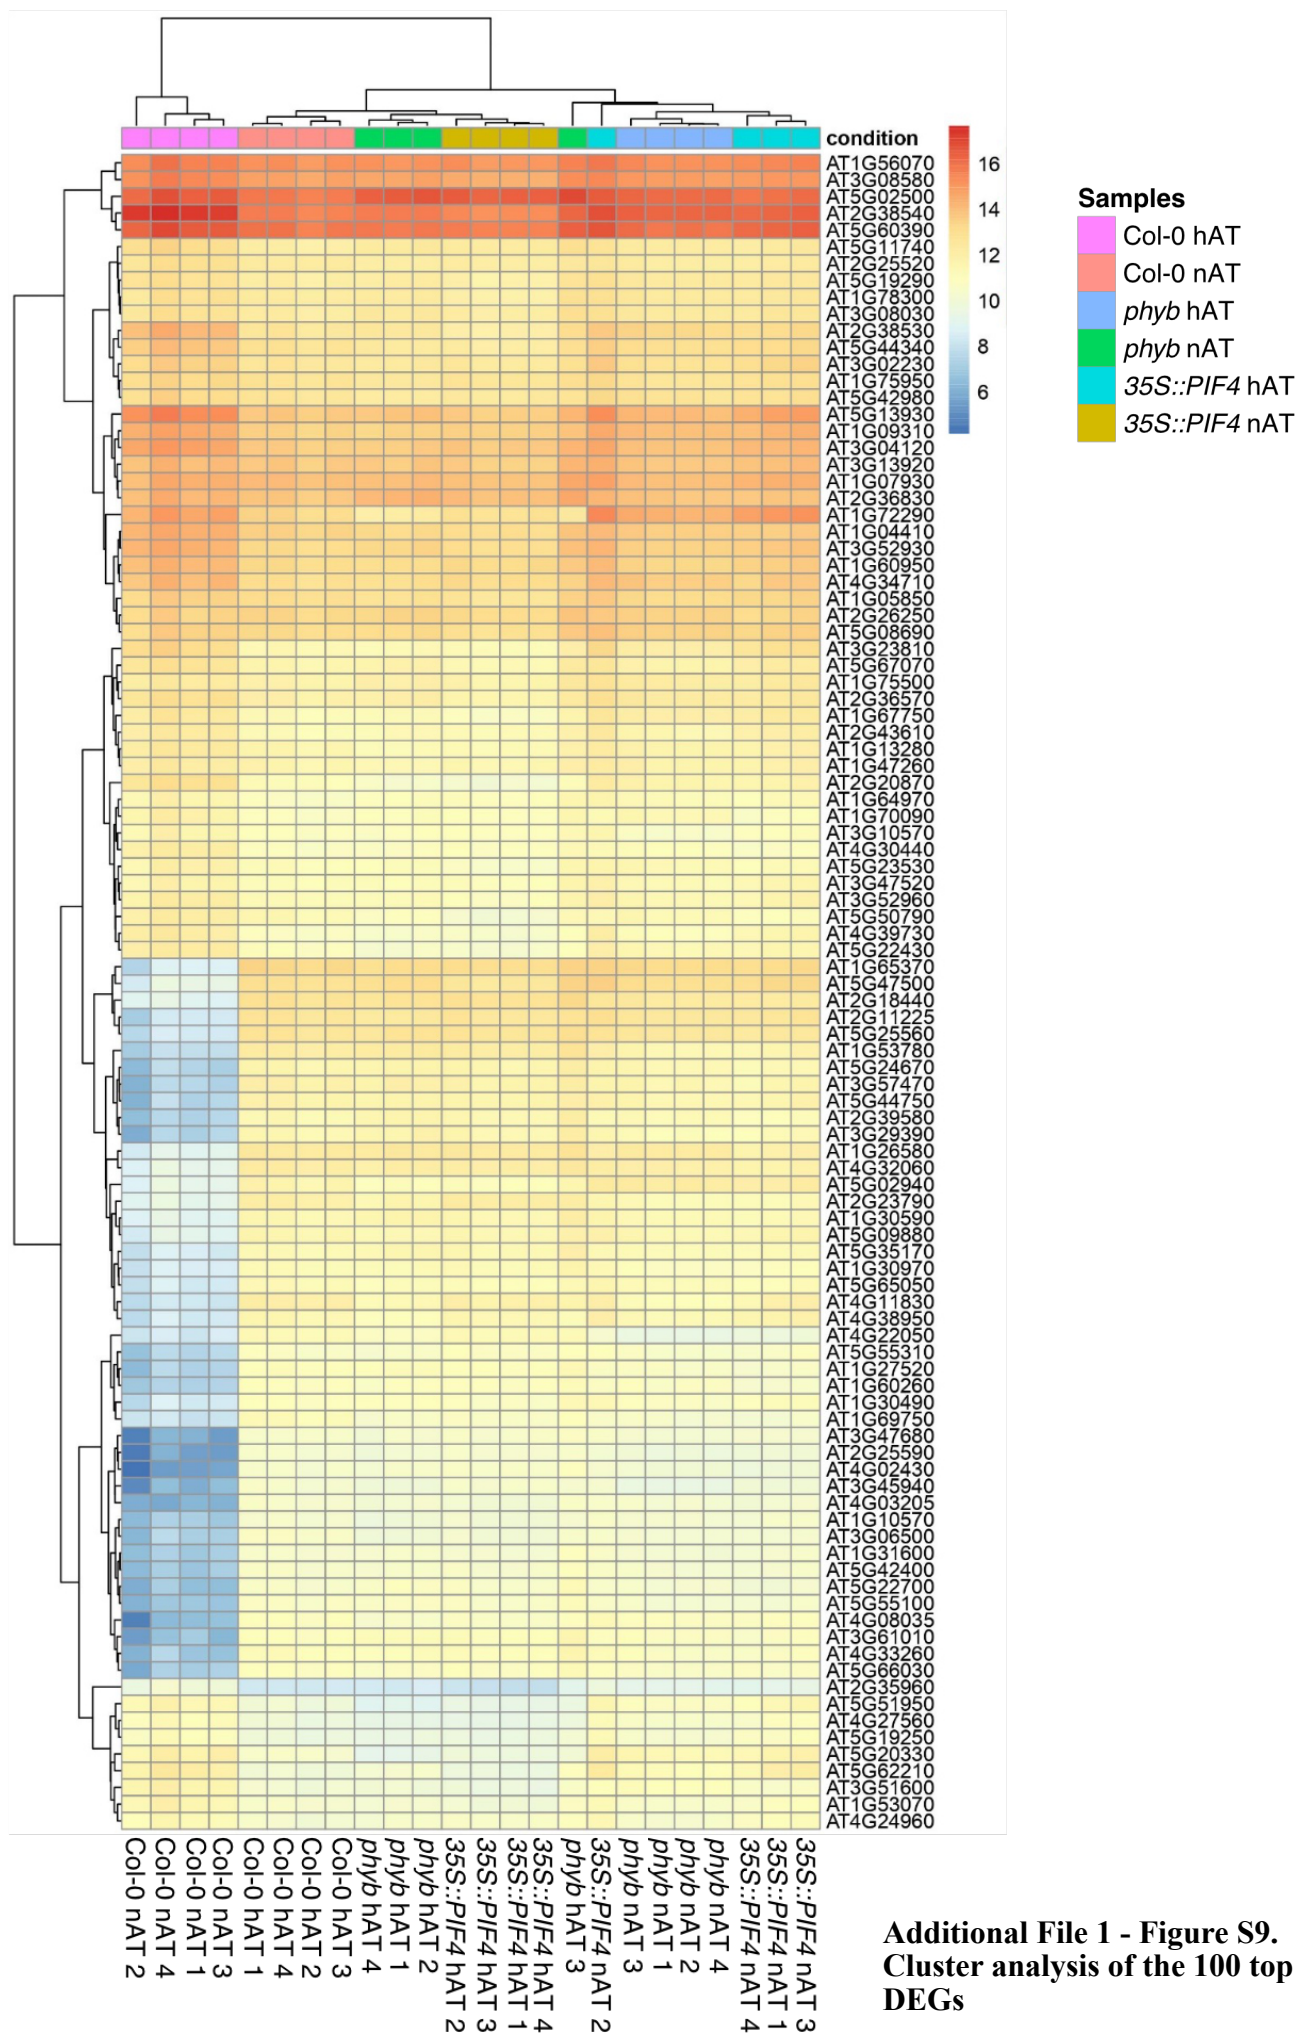

Supplement: Supplementary file 1 [file 1e3dc093a65bcae4f39d40a1.pdf]
