# Supplementary material for: Integrative phenotyping approaches to unmask the Phyb-PIF4 pathway in Arabidopsis thaliana reproductive organs at high ambient temperatures
Source: Research Square preprint supplement (doi:10.21203/rs.3.rs-4223427/v1), 2024-04-15
Supplement: Supplementary file 1 [file 06d10199471b79fbe6a8de21.xlsx]

## Sheet: ANOVA_NC_30_DAT
sum_sq	df	F	PR(>F)
1467.77	8	38.2829	1.94429e-24
388.194	81

## Sheet: Tukey_NC_30_DAT
group1	group2	meandiff	p-adj	lower	upper	reject
35s::PIF4	COL-0	1.0243	0.9799	-2.0961	4.1447	FALSE
35s::PIF4	phyb	11.6994	0	8.5791	14.8198	TRUE
35s::PIF4	pif3	2.2229	0.3721	-0.8975	5.3432	FALSE
35s::PIF4	pif3pif7	-0.5271	0.9998	-3.6475	2.5932	FALSE
35s::PIF4	pif4	-0.52	0.9998	-3.6404	2.6004	FALSE
35s::PIF4	pif7-1	-1.87	0.6089	-4.9904	1.2504	FALSE
35s::PIF4	pif7-2	-2.1914	0.3917	-5.3118	0.9289	FALSE
35s::PIF4	pifq	-1.6086	0.7782	-4.7289	1.5118	FALSE
COL-0	phyb	10.6751	0	7.5548	13.7955	TRUE
COL-0	pif3	1.1986	0.9488	-1.9218	4.3189	FALSE
COL-0	pif3pif7	-1.5514	0.8102	-4.6718	1.5689	FALSE
COL-0	pif4	-1.5443	0.8141	-4.6647	1.5761	FALSE
COL-0	pif7-1	-2.8943	0.0907	-6.0147	0.2261	FALSE
COL-0	pif7-2	-3.2157	0.0383	-6.3361	-0.0953	TRUE
COL-0	pifq	-2.6329	0.1682	-5.7532	0.4875	FALSE
phyb	pif3	-9.4766	0	-12.5969	-6.3562	TRUE
phyb	pif3pif7	-12.2266	0	-15.3469	-9.1062	TRUE
phyb	pif4	-12.2194	0	-15.3398	-9.0991	TRUE
phyb	pif7-1	-13.5694	0	-16.6898	-10.4491	TRUE
phyb	pif7-2	-13.8909	0	-17.0112	-10.7705	TRUE
phyb	pifq	-13.308	0	-16.4284	-10.1876	TRUE
pif3	pif3pif7	-2.75	0.1288	-5.8704	0.3704	FALSE
pif3	pif4	-2.7429	0.131	-5.8632	0.3775	FALSE
pif3	pif7-1	-4.0929	0.0023	-7.2132	-0.9725	TRUE
pif3	pif7-2	-4.4143	0.0007	-7.5347	-1.2939	TRUE
pif3	pifq	-3.8314	0.0056	-6.9518	-0.7111	TRUE
pif3pif7	pif4	0.0071	1	-3.1132	3.1275	FALSE
pif3pif7	pif7-1	-1.3429	0.9051	-4.4632	1.7775	FALSE
pif3pif7	pif7-2	-1.6643	0.7448	-4.7847	1.4561	FALSE
pif3pif7	pifq	-1.0814	0.9719	-4.2018	2.0389	FALSE
pif4	pif7-1	-1.35	0.9025	-4.4704	1.7704	FALSE
pif4	pif7-2	-1.6714	0.7404	-4.7918	1.4489	FALSE
pif4	pifq	-1.0886	0.9708	-4.2089	2.0318	FALSE
pif7-1	pif7-2	-0.3214	1	-3.4418	2.7989	FALSE
pif7-1	pifq	0.2614	1	-2.8589	3.3818	FALSE
pif7-2	pifq	0.5829	0.9996	-2.5375	3.7032	FALSE

## Sheet: ANOVA_HT_30_DAT
sum_sq	df	F	PR(>F)
968.525	8	6.33583	2.32275e-06
1547.75	81

## Sheet: ANOVA_NC_37_DAT
sum_sq	df	F	PR(>F)
1661.93	8	9.29468	5.32141e-09
1810.4	81

## Sheet: Tukey_NC_37_DAT
group1	group2	meandiff	p-adj	lower	upper	reject
35s::PIF4	COL-0	5.7067	0.1646	-1.0319	12.4453	FALSE
35s::PIF4	phyb	10.9733	0.0001	4.2347	17.7119	TRUE
35s::PIF4	pif3	5.2933	0.2459	-1.4453	12.0319	FALSE
35s::PIF4	pif3pif7	2.0267	0.9885	-4.7119	8.7653	FALSE
35s::PIF4	pif4	1.55	0.9981	-5.1886	8.2886	FALSE
35s::PIF4	pif7-1	-2.4767	0.9602	-9.2153	4.2619	FALSE
35s::PIF4	pif7-2	-2.6033	0.9471	-9.3419	4.1353	FALSE
35s::PIF4	pifq	-1.96	0.9907	-8.6986	4.7786	FALSE
COL-0	phyb	5.2667	0.2519	-1.4719	12.0053	FALSE
COL-0	pif3	-0.4133	1	-7.1519	6.3253	FALSE
COL-0	pif3pif7	-3.68	0.7199	-10.4186	3.0586	FALSE
COL-0	pif4	-4.1567	0.571	-10.8953	2.5819	FALSE
COL-0	pif7-1	-8.1833	0.0065	-14.9219	-1.4447	TRUE
COL-0	pif7-2	-8.31	0.0053	-15.0486	-1.5714	TRUE
COL-0	pifq	-7.6667	0.014	-14.4053	-0.9281	TRUE
phyb	pif3	-5.68	0.1692	-12.4186	1.0586	FALSE
phyb	pif3pif7	-8.9467	0.0019	-15.6853	-2.2081	TRUE
phyb	pif4	-9.4233	0.0009	-16.1619	-2.6847	TRUE
phyb	pif7-1	-13.45	0	-20.1886	-6.7114	TRUE
phyb	pif7-2	-13.5767	0	-20.3153	-6.8381	TRUE
phyb	pifq	-12.9333	0	-19.6719	-6.1947	TRUE
pif3	pif3pif7	-3.2667	0.8306	-10.0053	3.4719	FALSE
pif3	pif4	-3.7433	0.701	-10.4819	2.9953	FALSE
pif3	pif7-1	-7.77	0.0121	-14.5086	-1.0314	TRUE
pif3	pif7-2	-7.8967	0.01	-14.6353	-1.1581	TRUE
pif3	pifq	-7.2533	0.0252	-13.9919	-0.5147	TRUE
pif3pif7	pif4	-0.4767	1	-7.2153	6.2619	FALSE
pif3pif7	pif7-1	-4.5033	0.4608	-11.2419	2.2353	FALSE
pif3pif7	pif7-2	-4.63	0.4221	-11.3686	2.1086	FALSE
pif3pif7	pifq	-3.9867	0.6254	-10.7253	2.7519	FALSE
pif4	pif7-1	-4.0267	0.6127	-10.7653	2.7119	FALSE
pif4	pif7-2	-4.1533	0.5721	-10.8919	2.5853	FALSE
pif4	pifq	-3.51	0.7683	-10.2486	3.2286	FALSE
pif7-1	pif7-2	-0.1267	1	-6.8653	6.6119	FALSE
pif7-1	pifq	0.5167	1	-6.2219	7.2553	FALSE
pif7-2	pifq	0.6433	1	-6.0953	7.3819	FALSE

## Sheet: ANOVA_HT_37_DAT
sum_sq	df	F	PR(>F)
896.338	8	5.35788	2.06122e-05
1693.85	81

## Sheet: Tukey_HT_37_DAT
group1	group2	meandiff	p-adj	lower	upper	reject
35s::PIF4	COL-0	9.82	0.0002	3.3019	16.3381	TRUE
35s::PIF4	phyb	8.42	0.0028	1.9019	14.9381	TRUE
35s::PIF4	pif3	9.66	0.0003	3.1419	16.1781	TRUE
35s::PIF4	pif3pif7	8.12	0.0046	1.6019	14.6381	TRUE
35s::PIF4	pif4	9.76	0.0003	3.2419	16.2781	TRUE
35s::PIF4	pif7-1	10.78	0	4.2619	17.2981	TRUE
35s::PIF4	pif7-2	10.35	0.0001	3.8319	16.8681	TRUE
35s::PIF4	pifq	6.22	0.0733	-0.2981	12.7381	FALSE
COL-0	phyb	-1.4	0.9989	-7.9181	5.1181	FALSE
COL-0	pif3	-0.16	1	-6.6781	6.3581	FALSE
COL-0	pif3pif7	-1.7	0.9955	-8.2181	4.8181	FALSE
COL-0	pif4	-0.06	1	-6.5781	6.4581	FALSE
COL-0	pif7-1	0.96	0.9999	-5.5581	7.4781	FALSE
COL-0	pif7-2	0.53	1	-5.9881	7.0481	FALSE
COL-0	pifq	-3.6	0.7074	-10.1181	2.9181	FALSE
phyb	pif3	1.24	0.9995	-5.2781	7.7581	FALSE
phyb	pif3pif7	-0.3	1	-6.8181	6.2181	FALSE
phyb	pif4	1.34	0.9992	-5.1781	7.8581	FALSE
phyb	pif7-1	2.36	0.9636	-4.1581	8.8781	FALSE
phyb	pif7-2	1.93	0.9896	-4.5881	8.4481	FALSE
phyb	pifq	-2.2	0.9761	-8.7181	4.3181	FALSE
pif3	pif3pif7	-1.54	0.9978	-8.0581	4.9781	FALSE
pif3	pif4	0.1	1	-6.4181	6.6181	FALSE
pif3	pif7-1	1.12	0.9998	-5.3981	7.6381	FALSE
pif3	pif7-2	0.69	1	-5.8281	7.2081	FALSE
pif3	pifq	-3.44	0.7555	-9.9581	3.0781	FALSE
pif3pif7	pif4	1.64	0.9965	-4.8781	8.1581	FALSE
pif3pif7	pif7-1	2.66	0.9283	-3.8581	9.1781	FALSE
pif3pif7	pif7-2	2.23	0.9741	-4.2881	8.7481	FALSE
pif3pif7	pifq	-1.9	0.9906	-8.4181	4.6181	FALSE
pif4	pif7-1	1.02	0.9999	-5.4981	7.5381	FALSE
pif4	pif7-2	0.59	1	-5.9281	7.1081	FALSE
pif4	pifq	-3.54	0.7258	-10.0581	2.9781	FALSE
pif7-1	pif7-2	-0.43	1	-6.9481	6.0881	FALSE
pif7-1	pifq	-4.56	0.397	-11.0781	1.9581	FALSE
pif7-2	pifq	-4.13	0.5347	-10.6481	2.3881	FALSE

## Sheet: ANOVA_NC_41_DAT
sum_sq	df	F	PR(>F)
685.788	8	5.8606	6.63834e-06
1184.79	81

## Sheet: Tukey_NC_41_DAT
group1	group2	meandiff	p-adj	lower	upper	reject
35s::PIF4	COL-0	5.994	0.0203	0.5426	11.4454	TRUE
35s::PIF4	phyb	8.554	0.0001	3.1026	14.0054	TRUE
35s::PIF4	pif3	4.336	0.2312	-1.1154	9.7874	FALSE
35s::PIF4	pif3pif7	3.144	0.657	-2.3074	8.5954	FALSE
35s::PIF4	pif4	1.654	0.9878	-3.7974	7.1054	FALSE
35s::PIF4	pif7-1	0.676	1	-4.7754	6.1274	FALSE
35s::PIF4	pif7-2	2.242	0.9253	-3.2094	7.6934	FALSE
35s::PIF4	pifq	-0.196	1	-5.6474	5.2554	FALSE
COL-0	phyb	2.56	0.8539	-2.8914	8.0114	FALSE
COL-0	pif3	-1.658	0.9876	-7.1094	3.7934	FALSE
COL-0	pif3pif7	-2.85	0.7648	-8.3014	2.6014	FALSE
COL-0	pif4	-4.34	0.2302	-9.7914	1.1114	FALSE
COL-0	pif7-1	-5.318	0.0615	-10.7694	0.1334	FALSE
COL-0	pif7-2	-3.752	0.4197	-9.2034	1.6994	FALSE
COL-0	pifq	-6.19	0.0143	-11.6414	-0.7386	TRUE
phyb	pif3	-4.218	0.2641	-9.6694	1.2334	FALSE
phyb	pif3pif7	-5.41	0.0534	-10.8614	0.0414	FALSE
phyb	pif4	-6.9	0.0038	-12.3514	-1.4486	TRUE
phyb	pif7-1	-7.878	0.0005	-13.3294	-2.4266	TRUE
phyb	pif7-2	-6.312	0.0115	-11.7634	-0.8606	TRUE
phyb	pifq	-8.75	0.0001	-14.2014	-3.2986	TRUE
pif3	pif3pif7	-1.192	0.9987	-6.6434	4.2594	FALSE
pif3	pif4	-2.682	0.8189	-8.1334	2.7694	FALSE
pif3	pif7-1	-3.66	0.4544	-9.1114	1.7914	FALSE
pif3	pif7-2	-2.094	0.9487	-7.5454	3.3574	FALSE
pif3	pifq	-4.532	0.183	-9.9834	0.9194	FALSE
pif3pif7	pif4	-1.49	0.9939	-6.9414	3.9614	FALSE
pif3pif7	pif7-1	-2.468	0.8775	-7.9194	2.9834	FALSE
pif3pif7	pif7-2	-0.902	0.9998	-6.3534	4.5494	FALSE
pif3pif7	pifq	-3.34	0.58	-8.7914	2.1114	FALSE
pif4	pif7-1	-0.978	0.9997	-6.4294	4.4734	FALSE
pif4	pif7-2	0.588	1	-4.8634	6.0394	FALSE
pif4	pifq	-1.85	0.9753	-7.3014	3.6014	FALSE
pif7-1	pif7-2	1.566	0.9915	-3.8854	7.0174	FALSE
pif7-1	pifq	-0.872	0.9999	-6.3234	4.5794	FALSE
pif7-2	pifq	-2.438	0.8847	-7.8894	3.0134	FALSE

## Sheet: ANOVA_HT_41_DAT
sum_sq	df	F	PR(>F)
1432.3	8	9.73767	2.28556e-09
1489.27	81

[truncated: 3 more sheets: Tukey_HT_41_DAT, Tukey_HT_30_DAT, T-Tests_NC_vs_HT]
