# Supplementary material for: Integrative phenotyping approaches to unmask the Phyb-PIF4 pathway in Arabidopsis thaliana reproductive organs at high ambient temperatures
Source: Research Square preprint supplement (doi:10.21203/rs.3.rs-4223427/v1), 2024-04-15
Supplement: Supplementary file 2 [file 46ed4c4f78affe8c65519cb7.pdf]

**Table S1 Quantification of lateral root density.**

Table presents the mean number of lateral roots per centimeter of the primary root for each genotype/condition. This analysis includes data from 16 plants per genotype per condition in triplicate. Statistical differences were assessed by a two-way Analysis of Variance (ANOVA). Subsequently, *post-hoc* analysis using Tukey's test was conducted to identify specific group differences. Genotypes that share the same letter do not show a statistically significant difference from each other.

| Genotype         | Growth conditions | Averaged number of lateral<br>root/cm of primary root | Statistical groups |
|------------------|-------------------|-------------------------------------------------------|--------------------|
| Col-0            | nAT               | 2.29                                                  | a                  |
| Col-0            | hAT               | 1.61                                                  | b                  |
| <i>phyb</i>      | nAT               | 1.54                                                  | b                  |
| <i>phyb</i>      | hAT               | 1.01                                                  | d                  |
| <i>35S::PIF4</i> | nAT               | 1.77                                                  | b                  |
| <i>35S::PIF4</i> | hAT               | 1.59                                                  | b                  |
| <i>pif4</i>      | nAT               | 2.12                                                  | a                  |
| <i>pif4</i>      | hAT               | 1.47                                                  | b                  |

**Table S2 Mean of the length of the four longest lateral roots at maturity.**

Table presents the mean of the length of the four longest lateral roots at maturity for each genotype/condition. The analysis encompasses 16 plants for each genotype. Statistical differences were assessed by a two-way Analysis of Variance (ANOVA). Subsequently, *post-hoc* analysis using Tukey's test was conducted to identify specific group differences. Genotypes that share the same letter do not show a statistically significant difference from each other.

| Genotype         | Growth conditions | Averaged lateral root length (cm) | Statistical groups |
|------------------|-------------------|-----------------------------------|--------------------|
| Col-0            | nAT               | 4.28                              | a                  |
| Col-0            | hAT               | 9.20                              | b                  |
| <i>phyb</i>      | nAT               | 4.48                              | a c                |
| <i>phyb</i>      | hAT               | 6.09                              | c                  |
| <i>35S::PIF4</i> | nAT               | 5.16                              | a c                |
| <i>35S::PIF4</i> | hAT               | 8.09                              | b                  |
| <i>pif4</i>      | nAT               | 4.26                              | a                  |
| <i>pif4</i>      | hAT               | 8.53                              | b                  |

**Table S3. Statistical analysis related to Table 3. Anther abortion rate for different genotypes in nAT and hAT**

| <i>Comparing anther phenotype for each genotype at hAT vs nAT</i>            |                           |                         |
|------------------------------------------------------------------------------|---------------------------|-------------------------|
| <b>Genotype</b>                                                              | 7 DAFD - <i>p</i> -values | 9 DAFD <i>p</i> -values |
| Col-0                                                                        | 0.18242                   | 0.02465 *               |
| <i>phyb</i>                                                                  | 0.00491 *                 | 0.00000 ***             |
| <i>35S::PIF4</i>                                                             | 0.00000 ***               | 0.00000 ***             |
| <i>pif4</i>                                                                  | 1.00000                   | 0.45918                 |
| <i>pifq</i>                                                                  | 1.00000                   | 0.51969                 |
| <i>Comparing anther phenotype of each genotype with Col-0 at hAT</i>         |                           |                         |
| <b>Genotype</b>                                                              | 7 DAFD - <i>p</i> -values | 9 DAFD <i>p</i> -values |
| <i>phyb</i>                                                                  | 0.39965                   | 0.00005 ###             |
| <i>35S::PIF4</i>                                                             | 0.01527 #                 | 0.00576 ##              |
| <i>pif4</i>                                                                  | 0.10287                   | 0.08243                 |
| <i>pifq</i>                                                                  | 0.11841                   | 0.03315 #               |
| # 0.05-0.01; ## 0.009-0.0001; ### 0.00009 – 0.000000                         |                           |                         |
| <i>Comparing anther phenotype of each genotype at 7 with 9 DAFD under HT</i> |                           |                         |
| <b>Genotype</b>                                                              | <i>p</i> -values          |                         |
| Col-0                                                                        | 0.275471698               |                         |
| <i>phyb</i>                                                                  | 0.000436936^^^            |                         |
| <i>35S::PIF4</i>                                                             | 0.540567636               |                         |
| <i>pif4</i>                                                                  | 1                         |                         |
| <i>pifq</i>                                                                  | 0.532627646               |                         |
| ^ 0.05-0.01; ^^ 0.009-0.0001; ^^^ 0.00009 – 0.000000                         |                           |                         |

The Fisher's exact test was performed for these comparisons. At least 40 anthers for each genotype/condition were examined. The experiments were performed in triplicate.

**Table S4. Ovule defective phenotypes for the different genotypes at nAT and hAT**

| Genotype         | Growth conditions | Normal | n   | % of total defects | % collapsed embryo sac | % collapsed synergids | % unfused CC nuclei | % other defects |
|------------------|-------------------|--------|-----|--------------------|------------------------|-----------------------|---------------------|-----------------|
| Col-0            | nAT               | 122    | 129 | 5.4                | 0                      | 5.4                   | 0.0                 | 0.0             |
| Col-0            | hAT               | 102    | 147 | 30.6               | 17.5                   | 8.5                   | 2.0                 | 2.6             |
| <i>phyb</i>      | nAT               | 78     | 95  | 17.9               | 2.1                    | 6.3                   | 8.4                 | 1.1             |
| <i>phyb</i>      | hAT               | 31     | 83  | 62.6               | 24.8                   | 14.9                  | 3.1                 | 19.8            |
| <i>35S::PIF4</i> | nAT               | 115    | 137 | 16.1               | 7.1                    | 4.8                   | 2.1                 | 2.1             |
| <i>35S::PIF4</i> | hAT               | 16     | 102 | 84.3               | 67.8                   | 6.4                   | 0.9                 | 9.2             |
| <i>pif4</i>      | nAT               | 90     | 98  | 8.2                | 4.9                    | 0.0                   | 0.0                 | 3.5             |
| <i>pif4</i>      | hAT               | 55     | 76  | 27.6               | 18.4                   | 5.6                   | 0.0                 | 3.6             |
| <i>pifq</i>      | nAT               | 77     | 85  | 9.4                | 7.0                    | 2.4                   | 0.0                 | 0.0             |
| <i>pifq</i>      | hAT               | 37     | 68  | 45.6               | 33.8                   | 7.4                   | 0.0                 | 4.4             |

The experiments were performed in triplicate. Relates to Table 4. Ovule defective phenotypes for the different genotypes at nAT and hAT

**Table S5. Transcriptomic data summary**

| <b>Sample</b>        | <b>replicate</b> | <b>clean reads</b> | <b>GC %</b> | <b>quality<br/>scores Q20</b> | <b>quality<br/>scores Q30</b> |
|----------------------|------------------|--------------------|-------------|-------------------------------|-------------------------------|
| Col-0 nAT            | 1                | 42 060 406         | 46.01       | 98.07                         | 94.13                         |
| Col-0 nAT            | 2                | 40 429 238         | 45.73       | 97.85                         | 93.58                         |
| Col-0 nAT            | 3                | 40 740 204         | 45.72       | 97.96                         | 93.84                         |
| Col-0 nAT            | 4                | 52 496 928         | 45.76       | 97.79                         | 93.5                          |
| Col-0 hAT            | 1                | 52 031 214         | 44.63       | 98.05                         | 94.04                         |
| Col-0 hAT            | 2                | 43 336 384         | 44.67       | 97.70                         | 93.15                         |
| Col-0 hAT            | 3                | 47 869 856         | 44.70       | 98.04                         | 94.14                         |
| <i>phyb</i> nAT      | 1                | 52 254 686         | 44.70       | 97.91                         | 93.68                         |
| <i>phyb</i> nAT      | 2                | 48 593 332         | 45.14       | 97.97                         | 93.80                         |
| <i>phyb</i> nAT      | 3                | 46 759 364         | 44.77       | 97.97                         | 93.81                         |
| <i>phyb</i> nAT      | 4                | 52 854 984         | 44.69       | 98.00                         | 93.96                         |
| <i>phyb</i> hAT      | 1                | 45 987 996         | 44.72       | 97.93                         | 93.74                         |
| <i>phyb</i> hAT      | 2                | 45 703 752         | 44.83       | 97.93                         | 93.95                         |
| <i>phyb</i> hAT      | 3                | 47 669 986         | 45.11       | 97.81                         | 93.58                         |
| <i>phyb</i> hAT      | 4                | 65 471 960         | 45.03       | 97.81                         | 93.58                         |
| <i>35S::PIF4</i> nAT | 1                | 43 886 772         | 45.13       | 98.34                         | 94.99                         |
| <i>35S::PIF4</i> nAT | 2                | 50 746 592         | 44.72       | 98.02                         | 93.95                         |
| <i>35S::PIF4</i> nAT | 3                | 65 893 110         | 44.99       | 98.06                         | 94.21                         |
| <i>35S::PIF4</i> nAT | 4                | 55 254 998         | 44.83       | 98.15                         | 94.29                         |
| <i>35S::PIF4</i> hAT | 1                | 46 380 078         | 44.91       | 97.97                         | 93.85                         |
| <i>35S::PIF4</i> hAT | 2                | 43 825 406         | 44.64       | 98.03                         | 93.98                         |
| <i>35S::PIF4</i> hAT | 3                | 48 510 456         | 44.67       | 97.88                         | 93.60                         |
| <i>35S::PIF4</i> hAT | 4                | 42 629 628         | 44.57       | 98.01                         | 93.91                         |

**Table S6. Mean of suspensor length for each genotype/condition.**

| Genotype         | Growth conditions | Suspensor length (μm) | n  | Statistical groups |
|------------------|-------------------|-----------------------|----|--------------------|
| Col-0            | nAT               | 97.18                 | 26 | a                  |
| Col-0            | hAT               | 86.14                 | 23 | c                  |
| <i>35S::PIF4</i> | nAT               | 110.96                | 29 | b                  |
| <i>35S::PIF4</i> | hAT               | 74.86                 | 5  | c d                |
| <i>phyb</i>      | nAT               | 98.22                 | 30 | a                  |
| <i>phyb</i>      | hAT               | 84.20                 | 17 | c                  |
| <i>pif4</i>      | nAT               | 104.00                | 24 | a b                |
| <i>pif4</i>      | hAT               | 75.66                 | 8  | c d                |
| <i>pifq</i>      | nAT               | 101.31                | 16 | a b                |
| <i>pifq</i>      | hAT               | 66.90                 | 27 | d                  |

The experiments were performed in triplicate. Relates to Figure 5. Statistical differences were assessed by a two-way Analysis of Variance (ANOVA). Subsequently, *post-hoc* analysis using Tukey's test was conducted to identify specific group differences. Genotypes that share the same letter do not show a statistically significant difference from each other.

**Table S7. Seed size**

The surface area of 1 000 seeds for each genotype were analyzed in triplicate at nAT and hAT. Relates to Fig. 9b. Statistical differences were assessed by a two-way Analysis of Variance (ANOVA). Subsequently, *post-hoc* analysis using Tukey's test was conducted to identify specific group differences. Genotypes that share the same letter do not show a statistically significant difference from each other.

| Genotype         | Growth conditions | Mean seed surface (mm <sup>2</sup> ) | Statistical groups |
|------------------|-------------------|--------------------------------------|--------------------|
| Col-0            | nAT               | 0.0804                               | a                  |
| Col-0            | hAT               | 0.1084                               | c                  |
| <i>35S::PIF4</i> | nAT               | 0.0814                               | a                  |
| <i>35S::PIF4</i> | hAT               | 0.1072                               | c                  |
| <i>phyb</i>      | nAT               | 0.0847                               | b                  |
| <i>phyb</i>      | hAT               | 0.1252                               | d                  |
| <i>pif4</i>      | nAT               | 0.0837                               | b                  |
| <i>pif4</i>      | hAT               | 0.1047                               | e                  |
| <i>pifq</i>      | nAT               | 0.0790                               | a                  |
| <i>pifq</i>      | hAT               | 0.1167                               | f                  |

**Table S8. Seed shape**

Ratio of seed length over seed area of about 1 000 seeds for each genotype were analyzed in triplicate from plants grown at nAT and hAT. Statistical differences were assessed by a two-way Analysis of Variance (ANOVA). Subsequently, *post-hoc* analysis using Tukey's test was conducted to identify specific group differences. Genotypes that share the same letter do not show a statistically significant difference from each other.

| Genotype         | Growth conditions | seed length / area | Statistical groups |
|------------------|-------------------|--------------------|--------------------|
| Col-0            | nAT               | 5.1517             | a c                |
| Col-0            | hAT               | 4.4843             | d g                |
| <i>35S::PIF4</i> | nAT               | 5.1986             | a                  |
| <i>35S::PIF4</i> | hAT               | 4.3479             | f                  |
| <i>phyb</i>      | nAT               | 4.7850             | b                  |
| <i>phyb</i>      | hAT               | 4.1510             | e                  |
| <i>pif4</i>      | nAT               | 4.7850             | b                  |
| <i>pif4</i>      | hAT               | 4.5037             | g                  |
| <i>pifq</i>      | nAT               | 5.1286             | c                  |
| <i>pifq</i>      | hAT               | 4.3639             | d f                |



**Table S9. Number of seeds produced per silique.**

The number of seeds per silique was calculated from at least 12 siliques per genotype from plants grown at nAT and hAT. Statistical differences were assessed by a two-way Analysis of Variance (ANOVA). Subsequently, *post-hoc* analysis using Tukey's test was conducted to identify specific group differences. Genotypes that share the same letter do not show a statistically significant difference from each other.

| Genotype         | Growth conditions | Averaged number of seeds<br>per silique | Statistical groups |
|------------------|-------------------|-----------------------------------------|--------------------|
| Col-0            | nAT               | 62.16                                   | a                  |
| Col-0            | hAT               | 42.14                                   | b                  |
| <i>35S::PIF4</i> | nAT               | 52.09                                   | a                  |
| <i>35S::PIF4</i> | hAT               | 25.50                                   | b                  |
| <i>phyb</i>      | nAT               | 47.75                                   | a                  |
| <i>phyb</i>      | hAT               | 36.48                                   | b                  |
| <i>pif4</i>      | nAT               | 62.96                                   | a                  |
| <i>pif4</i>      | hAT               | 43.33                                   | b                  |
| <i>pifq</i>      | nAT               | 60.36                                   | a                  |
| <i>pifq</i>      | hAT               | 44.35                                   | b                  |

**Table S10. The 100-seed weight.**

The weight of 100 seeds from each genotype is measured in triplicate from plants grown at nAT and hAT. To assess differences per genotypes and between the two different conditions, a two-way Analysis of Variance (ANOVA) was performed. Subsequently, *post-hoc* analysis using Tukey's test was conducted to identify specific group differences. Genotypes that share the same letter do not show a statistically significant difference from each other.

| Genotype         | Growth conditions | 100-seed mass (mg) | Statistical group |
|------------------|-------------------|--------------------|-------------------|
| Col-0            | nAT               | 1.80               | a                 |
| Col-0            | hAT               | 2.33               | b d               |
| <i>35S::PIF4</i> | nAT               | 1.93               | a                 |
| <i>35S::PIF4</i> | hAT               | 2.30               | b d               |
| <i>phyb</i>      | nAT               | 2.26               | b d               |
| <i>phyb</i>      | hAT               | 3.25               | c                 |
| <i>pif4</i>      | nAT               | 1.93               | a                 |
| <i>pif4</i>      | hAT               | 2.26               | b d               |
| <i>pifq</i>      | nAT               | 2.00               | a b               |
| <i>pifq</i>      | hAT               | 2.56               | d                 |
