# Supplementary material for: Integrative phenotyping approaches to unmask the Phyb-PIF4 pathway in Arabidopsis thaliana reproductive organs at high ambient temperatures
Source: Research Square preprint supplement (doi:10.21203/rs.3.rs-4223427/v1), 2024-04-15
Supplement: Supplementary file 5 [file 9bcc046322c97d642aca0abe.xlsx]

## Sheet: Primary_Root_Length_nAT
Plant Info	Time	Conditions	Root Length (cm)	Root Length (mm)
Col_0	10	nAT	2.8	28
Col_0	10	nAT	3.2	32
Col_0	10	nAT	3.6	36
Col_0	10	nAT	3.8	38
Col_0	10	nAT	3.8	38
Col_0	10	nAT	4.6	46
Col_0	10	nAT	3.5	35
Col_0	10	nAT	3.8	38
Col_0	10	nAT	3.6	36
Col_0	10	nAT	3.3	33
Col_0	10	nAT	3.1	31
Col_0	10	nAT	4.9	49
Col_0	10	nAT	3.8	38
35S::PIF4	10	nAT	3.5	35
35S::PIF4	10	nAT	3.2	32
35S::PIF4	10	nAT	3.1	31
35S::PIF4	10	nAT	3.4	34
35S::PIF4	10	nAT	3.3	33
35S::PIF4	10	nAT	3.2	32
35S::PIF4	10	nAT	3.3	33
35S::PIF4	10	nAT	3.1	31
35S::PIF4	10	nAT	3.4	34
35S::PIF4	10	nAT	2.8	28
35S::PIF4	10	nAT	2.4	24
35S::PIF4	10	nAT	2.7	27
35S::PIF4	10	nAT	2.4	24
phyb	10	nAT	2.6	26
phyb	10	nAT	2.9	29
phyb	10	nAT	2.7	27
phyb	10	nAT	2.6	26
phyb	10	nAT	3.3	33
phyb	10	nAT	3.4	34
phyb	10	nAT	2.6	26
phyb	10	nAT	2.6	26
phyb	10	nAT	1.9	19
phyb	10	nAT	2.2	22
phyb	10	nAT	2.5	25
phyb	10	nAT	2.5	25
phyb	10	nAT	2.3	23
pif4	10	nAT	3.2	32
pif4	10	nAT	2.9	29
pif4	10	nAT	3.4	34
pif4	10	nAT	3.5	35
pif4	10	nAT	3	30
pif4	10	nAT	2.8	28
pif4	10	nAT	3.1	31
pif4	10	nAT	2.9	29
pif4	10	nAT	3.2	32
pif4	10	nAT	2.6	26
pif4	10	nAT	3.2	32
pif4	10	nAT	3.2	32
pif4	10	nAT	3.4	34
Col_0	14	nAT	5.8	58
Col_0	14	nAT	7	70
Col_0	14	nAT	6.2	62
Col_0	14	nAT	7.6	76
Col_0	14	nAT	7.2	72
Col_0	14	nAT	6.9	69
Col_0	14	nAT	6.8	68
Col_0	14	nAT	7.4	74
Col_0	14	nAT	8	80
Col_0	14	nAT	5.8	58
Col_0	14	nAT	6.2	62
Col_0	14	nAT	6.7	67
Col_0	14	nAT	6.8	68
35S::PIF4	14	nAT	5.9	59
35S::PIF4	14	nAT	6.1	61
35S::PIF4	14	nAT	6.5	65
35S::PIF4	14	nAT	6.11	61.1
35S::PIF4	14	nAT	5.7	57
35S::PIF4	14	nAT	4.9	49
35S::PIF4	14	nAT	6.4	64
35S::PIF4	14	nAT	7.3	73
35S::PIF4	14	nAT	4.5	45
35S::PIF4	14	nAT	6.1	61
35S::PIF4	14	nAT	4.1	41
35S::PIF4	14	nAT	7.6	76
35S::PIF4	14	nAT	7	70
phyb	14	nAT	2.6	26
phyb	14	nAT	2.9	29
phyb	14	nAT	2.7	27
phyb	14	nAT	2.6	26
phyb	14	nAT	3.3	33
phyb	14	nAT	3.4	34
phyb	14	nAT	2.6	26
phyb	14	nAT	2.6	26
phyb	14	nAT	5.2	52
phyb	14	nAT	5.6	56
phyb	14	nAT	4.8	48
phyb	14	nAT	5.6	56
phyb	14	nAT	4.4	44
pif4	14	nAT	4.3	43
pif4	14	nAT	6.5	65
pif4	14	nAT	6.2	62
pif4	14	nAT	5.3	53
pif4	14	nAT	5.5	55
pif4	14	nAT	6.8	68
pif4	14	nAT	6.5	65
pif4	14	nAT	4.6	46
pif4	14	nAT	5.8	58
pif4	14	nAT	4.9	49
pif4	14	nAT	5.4	54
pif4	14	nAT	6.1	61
pif4	14	nAT	5.9	59
Col_0	16	nAT	9.1	91
Col_0	16	nAT	11.8	118
Col_0	16	nAT	10.1	101
Col_0	16	nAT	12.9	129
Col_0	16	nAT	11.9	119
Col_0	16	nAT	12.8	128
Col_0	16	nAT	12.12	121.2
Col_0	16	nAT	12.8	128
Col_0	16	nAT	13.6	136
Col_0	16	nAT	10.1	101
Col_0	16	nAT	8.9	89
Col_0	16	nAT	13.1	131
Col_0	16	nAT	11.9	119
35S::PIF4	16	nAT	9.2	92
35S::PIF4	16	nAT	10.44	104.4
35S::PIF4	16	nAT	10.9	109
35S::PIF4	16	nAT	10.5	105
35S::PIF4	16	nAT	10	100
35S::PIF4	16	nAT	8	80
35S::PIF4	16	nAT	10.6	106
35S::PIF4	16	nAT	12.22	122.2
35S::PIF4	16	nAT	9.5	95
35S::PIF4	16	nAT	8.4	84
35S::PIF4	16	nAT	6.6	66
35S::PIF4	16	nAT	12	120
35S::PIF4	16	nAT	8.8	88
phyb	16	nAT	9.8	98
phyb	16	nAT	9.4	94
phyb	16	nAT	10.2	102
phyb	16	nAT	7.4	74
phyb	16	nAT	10.6	106
phyb	16	nAT	11.35	113.5
phyb	16	nAT	7.4	74
phyb	16	nAT	6.6	66
phyb	16	nAT	9.1	91
phyb	16	nAT	10.3	103
phyb	16	nAT	8.4	84
phyb	16	nAT	8.8	88
phyb	16	nAT	7.59	75.9
pif4	16	nAT	6.2	62
pif4	16	nAT	11.5	115
pif4	16	nAT	10.6	106
pif4	16	nAT	11.11	111.1
pif4	16	nAT	9.9	99
pif4	16	nAT	11.7	117
pif4	16	nAT	10.3	103
pif4	16	nAT	8.8	88
pif4	16	nAT	11.2	112
pif4	16	nAT	11.5	115
pif4	16	nAT	9.7	97
pif4	16	nAT	10.6	106
pif4	16	nAT	10.4	104
Col_0	18	nAT	6.7	67
Col_0	18	nAT	8.2	82
Col_0	18	nAT	6.9	69
Col_0	18	nAT	10	100
Col_0	18	nAT	9.2	92
Col_0	18	nAT	9.5	95
Col_0	18	nAT	8.9	89
Col_0	18	nAT	8.8	88
Col_0	18	nAT	9.7	97
Col_0	18	nAT	8.6	86
Col_0	18	nAT	9.08	90.8
Col_0	18	nAT	8.3	83
Col_0	18	nAT	8.3	83
35S::PIF4	18	nAT	8	80
35S::PIF4	18	nAT	8.3	83
35S::PIF4	18	nAT	8.8	88
35S::PIF4	18	nAT	8.2	82
35S::PIF4	18	nAT	7.8	78
35S::PIF4	18	nAT	6.6	66
35S::PIF4	18	nAT	8.8	88
35S::PIF4	18	nAT	9.5	95
35S::PIF4	18	nAT	8.1	81
35S::PIF4	18	nAT	5.3	53
35S::PIF4	18	nAT	5.1	51
35S::PIF4	18	nAT	9.1	91
35S::PIF4	18	nAT	7.17	71.7
phyb	18	nAT	7.1	71
phyb	18	nAT	7.4	74
phyb	18	nAT	8	80
phyb	18	nAT	5.5	55
phyb	18	nAT	8.2	82
phyb	18	nAT	8.9	89
phyb	18	nAT	4.9	49
phyb	18	nAT	4.5	45
phyb	18	nAT	6.9	69
phyb	18	nAT	8.2	82
phyb	18	nAT	6.4	64
phyb	18	nAT	6.1	61
phyb	18	nAT	5.2	52
pif4	18	nAT	6.9	69
pif4	18	nAT	8.4	84
pif4	18	nAT	9.2	92
pif4	18	nAT	8.5	85
pif4	18	nAT	7.7	77
pif4	18	nAT	9	90
pif4	18	nAT	8	80
pif4	18	nAT	8.7	87
pif4	18	nAT	7.4	74
pif4	18	nAT	6.9	69
pif4	18	nAT	8.2	82
pif4	18	nAT	8	80
pif4	18	nAT	8.4	84
Col_0	21	nAT	13.8	138
Col_0	21	nAT	16.2	162
Col_0	21	nAT	15.3	153
Col_0	21	nAT	18.2	182
Col_0	21	nAT	16.6	166
Col_0	21	nAT	16.8	168
Col_0	21	nAT	16.5	165
Col_0	21	nAT	16.8	168
Col_0	21	nAT	16.7	167
Col_0	21	nAT	14.5	145
Col_0	21	nAT	15.7	157
Col_0	21	nAT	16.44	164.4
Col_0	21	nAT	16.7	167
35S::PIF4	21	nAT	12.6	126
35S::PIF4	21	nAT	14.3	143
35S::PIF4	21	nAT	14.4	144
35S::PIF4	21	nAT	14.12	141.2
35S::PIF4	21	nAT	14.6	146
35S::PIF4	21	nAT	13.59	135.9
35S::PIF4	21	nAT	11.7	117
35S::PIF4	21	nAT	16.1	161
35S::PIF4	21	nAT	11.9	119
35S::PIF4	21	nAT	10.5	105
35S::PIF4	21	nAT	10.4	104
35S::PIF4	21	nAT	15.7	157
35S::PIF4	21	nAT	13.2	132
phyb	21	nAT	14	140
phyb	21	nAT	15.6	156
phyb	21	nAT	15.4	154
phyb	21	nAT	10.7	107
phyb	21	nAT	13.7	137
phyb	21	nAT	15.4	154
phyb	21	nAT	11.5	115
phyb	21	nAT	10.11	101.1
phyb	21	nAT	12.8	128
phyb	21	nAT	15.11	151.1
phyb	21	nAT	14	140
phyb	21	nAT	13.5	135
phyb	21	nAT	10.59	105.9
pif4	21	nAT	11.45	114.5
pif4	21	nAT	16.9	169
pif4	21	nAT	15.3	153
pif4	21	nAT	14.7	147
pif4	21	nAT	16.45	164.5
pif4	21	nAT	15.11	151.1
pif4	21	nAT	14.39	143.9
pif4	21	nAT	12.6	126
pif4	21	nAT	16.2	162
pif4	21	nAT	15.8	158
pif4	21	nAT	14.5	145
pif4	21	nAT	16.7	167
pif4	21	nAT	14.2	142
Col_0	23	nAT	19.29	192.9
Col_0	23	nAT	20.5	205
Col_0	23	nAT	20	200
Col_0	23	nAT	21	210
Col_0	23	nAT	19.5	195
Col_0	23	nAT	21.4	214
Col_0	23	nAT	19.9	199
Col_0	23	nAT	21.3	213
Col_0	23	nAT	19.66	196.6
Col_0	23	nAT	18.18	181.8
Col_0	23	nAT	20.32	203.2
Col_0	23	nAT	19.15	191.5
Col_0	23	nAT	19.31	193.1
35S::PIF4	23	nAT	18.9	189
35S::PIF4	23	nAT	19.15	191.5
35S::PIF4	23	nAT	20.6	206
35S::PIF4	23	nAT	19.7	197
35S::PIF4	23	nAT	19.5	195
35S::PIF4	23	nAT	16.6	166
35S::PIF4	23	nAT	18.6	186
35S::PIF4	23	nAT	20.7	207
35S::PIF4	23	nAT	14.4	144
35S::PIF4	23	nAT	17.9	179
35S::PIF4	23	nAT	15.38	153.8
35S::PIF4	23	nAT	19.91	199.1
35S::PIF4	23	nAT	16.7	167
phyb	23	nAT	19	190
phyb	23	nAT	20	200
phyb	23	nAT	21.1	211
phyb	23	nAT	19.9	199
phyb	23	nAT	20	200
phyb	23	nAT	20.5	205
phyb	23	nAT	17.4	174
phyb	23	nAT	16.4	164
phyb	23	nAT	19.82	198.2
phyb	23	nAT	20.62	206.2
phyb	23	nAT	19.31	193.1
phyb	23	nAT	17.9	179
phyb	23	nAT	16.7	167
pif4	23	nAT	17.8	178
pif4	23	nAT	21	210
pif4	23	nAT	21.2	212
pif4	23	nAT	19.9	199
pif4	23	nAT	19.9	199
pif4	23	nAT	21.38	213.8
pif4	23	nAT	20.5	205
pif4	23	nAT	18.5	185
pif4	23	nAT	19.61	196.1
pif4	23	nAT	19.78	197.8
pif4	23	nAT	20.16	201.6
pif4	23	nAT	19.81	198.1
pif4	23	nAT	19.33	193.3

## Sheet: Primary_Root_Lenght_hAT
Line	Time	Condition	Root Length (cm)	Root Length (mm)
Col_0	10	hAT	4.6	46
Col_0	10	hAT	4.5	45
Col_0	10	hAT	3.9	39
Col_0	10	hAT	4.1	41
Col_0	10	hAT	3.2	32
Col_0	10	hAT	3.9	39
Col_0	10	hAT	4.1	41
Col_0	10	hAT	3.7	37
Col_0	10	hAT	2.8	28
Col_0	10	hAT	3.1	31
Col_0	10	hAT	3.6	36
Col_0	10	hAT	3	30
Col_0	10	hAT	4.1	41
phyb	10	hAT	2.9	29
phyb	10	hAT	3.4	34
phyb	10	hAT	3	30
phyb	10	hAT	2.4	24
phyb	10	hAT	3.3	33
phyb	10	hAT	3.1	31
phyb	10	hAT	3.4	34
phyb	10	hAT	2.5	25
phyb	10	hAT	2.7	27
phyb	10	hAT	2.9	29
phyb	10	hAT	1.8	18
phyb	10	hAT	2.2	22
phyb	10	hAT	2.3	23
35S::PIF4	10	hAT	3.3	33
35S::PIF4	10	hAT	3.2	32
35S::PIF4	10	hAT	3.2	32
35S::PIF4	10	hAT	2.9	29
35S::PIF4	10	hAT	2.6	26
35S::PIF4	10	hAT	3	30
35S::PIF4	10	hAT	3.3	33
35S::PIF4	10	hAT	3.3	33
35S::PIF4	10	hAT	3.5	35
35S::PIF4	10	hAT	3.4	34
35S::PIF4	10	hAT	3.4	34
35S::PIF4	10	hAT	2.7	27
35S::PIF4	10	hAT	3.1	31
pif4	10	hAT	3.6	36
pif4	10	hAT	3.8	38
pif4	10	hAT	3.9	39
pif4	10	hAT	3.5	35
pif4	10	hAT	3	30
pif4	10	hAT	2.9	29
pif4	10	hAT	3	30
pif4	10	hAT	3.2	32
pif4	10	hAT	3	30
pif4	10	hAT	3	30
pif4	10	hAT	2.26	22.6
pif4	10	hAT	3.4	34
pif4	10	hAT	3.7	37
Col_0	14	hAT	8.9	89
Col_0	14	hAT	8.9	89
Col_0	14	hAT	8.2	82
Col_0	14	hAT	7.8	78
Col_0	14	hAT	6.6	66
Col_0	14	hAT	6.9	69
Col_0	14	hAT	8.4	84
Col_0	14	hAT	7.8	78
Col_0	14	hAT	7.4	74
Col_0	14	hAT	8	80
Col_0	14	hAT	8.5	85
Col_0	14	hAT	9.3	93
Col_0	14	hAT	5.9	59
phyb	14	hAT	6.9	69
phyb	14	hAT	6.6	66
phyb	14	hAT	6.11	61.1
phyb	14	hAT	6	60
phyb	14	hAT	8	80
phyb	14	hAT	7.6	76
phyb	14	hAT	7.3	73
phyb	14	hAT	6.11	61.1
phyb	14	hAT	10	100
phyb	14	hAT	5.1	51
phyb	14	hAT	4.8	48
phyb	14	hAT	5.7	57
phyb	14	hAT	6.4	64
35S::PIF4	14	hAT	8.2	82
35S::PIF4	14	hAT	7.3	73
35S::PIF4	14	hAT	7.2	72
35S::PIF4	14	hAT	7.9	79
35S::PIF4	14	hAT	4.6	46
35S::PIF4	14	hAT	7.4	74
35S::PIF4	14	hAT	7.3	73
35S::PIF4	14	hAT	7.6	76
35S::PIF4	14	hAT	6.6	66
35S::PIF4	14	hAT	7.5	75
35S::PIF4	14	hAT	6.2	62
35S::PIF4	14	hAT	5.7	57
35S::PIF4	14	hAT	6.9	69
pif4	14	hAT	5.8	58
pif4	14	hAT	8.1	81
pif4	14	hAT	8.3	83
pif4	14	hAT	6.8	68
pif4	14	hAT	10	100
pif4	14	hAT	7.3	73
pif4	14	hAT	7.7	77
pif4	14	hAT	7.6	76
pif4	14	hAT	10	100
pif4	14	hAT	6.2	62
pif4	14	hAT	7.4	74
pif4	14	hAT	7.5	75
pif4	14	hAT	8.1	81
Col_0	16	hAT	14.3	143
Col_0	16	hAT	13	130
Col_0	16	hAT	13.1	131
Col_0	16	hAT	12.4	124
Col_0	16	hAT	10.33	103.3
Col_0	16	hAT	9.8	98
Col_0	16	hAT	12.7	127
Col_0	16	hAT	13.1	131
Col_0	16	hAT	17	170
Col_0	16	hAT	14.8	148
Col_0	16	hAT	14.8	148
Col_0	16	hAT	14.14	141.4
Col_0	16	hAT	12.75	127.5
phyb	16	hAT	11.8	118
phyb	16	hAT	14	140
phyb	16	hAT	7.16	71.6
phyb	16	hAT	8.4	84
phyb	16	hAT	10.9	109
phyb	16	hAT	11.56	115.6
phyb	16	hAT	11.6	116
phyb	16	hAT	10.4	104
phyb	16	hAT	11.7	117
phyb	16	hAT	12.2	122
phyb	16	hAT	9	90
phyb	16	hAT	8.6	86
phyb	16	hAT	9.3	93
35S::PIF4	16	hAT	13	130
35S::PIF4	16	hAT	11.5	115
35S::PIF4	16	hAT	10.5	105
35S::PIF4	16	hAT	12.2	122
35S::PIF4	16	hAT	5.8	58
35S::PIF4	16	hAT	10.7	107
35S::PIF4	16	hAT	9.7	97
35S::PIF4	16	hAT	11.4	114
35S::PIF4	16	hAT	8.5	85
35S::PIF4	16	hAT	12.15	121.5
35S::PIF4	16	hAT	11.7	117
35S::PIF4	16	hAT	9.64	96.4
35S::PIF4	16	hAT	11.04	110.4
pif4	16	hAT	10.7	107
pif4	16	hAT	13.3	133
pif4	16	hAT	13.9	139
pif4	16	hAT	9	90
pif4	16	hAT	12.6	126
pif4	16	hAT	11.4	114
pif4	16	hAT	12.6	126
pif4	16	hAT	12.6	126
pif4	16	hAT	12.7	127
pif4	16	hAT	10.3	103
pif4	16	hAT	14.8	148
pif4	16	hAT	13.3	133
pif4	16	hAT	14.2	142
Col_0	18	hAT	10.7	107
Col_0	18	hAT	10.5	105
Col_0	18	hAT	10.3	103
Col_0	18	hAT	10.5	105
Col_0	18	hAT	8.9	89
Col_0	18	hAT	7.7	77
Col_0	18	hAT	9.9	99
Col_0	18	hAT	9.8	98
Col_0	18	hAT	8.7	87
Col_0	18	hAT	10.08	100.8
Col_0	18	hAT	9.6	96
Col_0	18	hAT	11	110
Col_0	18	hAT	10.89	108.9
phyb	18	hAT	8.3	83
phyb	18	hAT	8.9	89
phyb	18	hAT	4.7	47
phyb	18	hAT	5.9	59
phyb	18	hAT	8.8	88
phyb	18	hAT	9.1	91
phyb	18	hAT	7.2	72
phyb	18	hAT	8.9	89
phyb	18	hAT	8.9	89
phyb	18	hAT	9.1	91
phyb	18	hAT	7.4	74
phyb	18	hAT	7.11	71.1
phyb	18	hAT	6.8	68
35S::PIF4	18	hAT	10.7	107
35S::PIF4	18	hAT	9.2	92
35S::PIF4	18	hAT	9.5	95
35S::PIF4	18	hAT	10.12	101.2
35S::PIF4	18	hAT	4.6	46
35S::PIF4	18	hAT	9	90
35S::PIF4	18	hAT	9.5	95
35S::PIF4	18	hAT	8.3	83
35S::PIF4	18	hAT	7.5	75
35S::PIF4	18	hAT	9.2	92
35S::PIF4	18	hAT	9	90
35S::PIF4	18	hAT	7.3	73
35S::PIF4	18	hAT	8.8	88
pif4	18	hAT	7.9	79
pif4	18	hAT	10.54	105.4
pif4	18	hAT	10.6	106
pif4	18	hAT	7.27	72.7
pif4	18	hAT	8.9	89
pif4	18	hAT	9.9	99
pif4	18	hAT	8.9	89
pif4	18	hAT	9.8	98
pif4	18	hAT	9.35	93.5
pif4	18	hAT	8.4	84
pif4	18	hAT	11.4	114
pif4	18	hAT	10.7	107
pif4	18	hAT	11	110
Col_0	21	hAT	17.9	179
Col_0	21	hAT	18.16	181.6
Col_0	21	hAT	17.8	178
Col_0	21	hAT	17.29	172.9
Col_0	21	hAT	13.66	136.6
Col_0	21	hAT	12.19	121.9
Col_0	21	hAT	16.9	169
Col_0	21	hAT	17.3	173
Col_0	21	hAT	21	210
Col_0	21	hAT	16.9	169
Col_0	21	hAT	17.4	174
Col_0	21	hAT	18.18	181.8
Col_0	21	hAT	17.2	172
phyb	21	hAT	15.1	151
phyb	21	hAT	13.6	136
phyb	21	hAT	9.6	96
phyb	21	hAT	12.24	122.4
phyb	21	hAT	15.8	158
phyb	21	hAT	16.12	161.2
phyb	21	hAT	14.5	145
phyb	21	hAT	12.9	129
phyb	21	hAT	15.8	158
phyb	21	hAT	16.3	163
phyb	21	hAT	11.7	117
phyb	21	hAT	12.4	124
phyb	21	hAT	14.8	148
35S::PIF4	21	hAT	15.3	153
35S::PIF4	21	hAT	16.1	161
35S::PIF4	21	hAT	14.4	144
35S::PIF4	21	hAT	16.6	166
35S::PIF4	21	hAT	6.8	68
35S::PIF4	21	hAT	15.16	151.6
35S::PIF4	21	hAT	13.2	132
35S::PIF4	21	hAT	14.9	149
35S::PIF4	21	hAT	9.6	96
35S::PIF4	21	hAT	15.8	158
35S::PIF4	21	hAT	18	180
35S::PIF4	21	hAT	12.5	125
35S::PIF4	21	hAT	15.2	152
pif4	21	hAT	14.7	147
pif4	21	hAT	17.5	175
pif4	21	hAT	18.3	183
pif4	21	hAT	12.9	129
pif4	21	hAT	16.7	167
pif4	21	hAT	15.3	153
pif4	21	hAT	15.8	158
pif4	21	hAT	17.2	172
pif4	21	hAT	17.11	171.1
pif4	21	hAT	14.9	149
pif4	21	hAT	19	190
pif4	21	hAT	18.3	183
pif4	21	hAT	18.5	185
Col_0	23	hAT	20.33	203.3
Col_0	23	hAT	19.2	192
Col_0	23	hAT	19.2	192
Col_0	23	hAT	19.3	193
Col_0	23	hAT	19.4	194
Col_0	23	hAT	16	160
Col_0	23	hAT	20	200
Col_0	23	hAT	19.2	192
Col_0	23	hAT	19.2	192
Col_0	23	hAT	19.71	197.1
Col_0	23	hAT	19.5	195
Col_0	23	hAT	14.4	144
Col_0	23	hAT	20.3	203
phyb	23	hAT	19.3	193
phyb	23	hAT	17	170
phyb	23	hAT	12.5	125
phyb	23	hAT	17.7	177
phyb	23	hAT	20.2	202
phyb	23	hAT	20	200
phyb	23	hAT	16.8	168
phyb	23	hAT	12.4	124
phyb	23	hAT	20.68	206.8
phyb	23	hAT	20.48	204.8
phyb	23	hAT	15.61	156.1
phyb	23	hAT	16.44	164.4
phyb	23	hAT	19.19	191.9
35S::PIF4	23	hAT	17.5	175
35S::PIF4	23	hAT	18.7	187
35S::PIF4	23	hAT	18.5	185
35S::PIF4	23	hAT	19.8	198
35S::PIF4	23	hAT	6	60
35S::PIF4	23	hAT	18.8	188
35S::PIF4	23	hAT	16.1	161
35S::PIF4	23	hAT	18.9	189
35S::PIF4	23	hAT	11.73	117.3
35S::PIF4	23	hAT	19.1	191
35S::PIF4	23	hAT	17.3	173
35S::PIF4	23	hAT	18.47	184.7
35S::PIF4	23	hAT	17.5	175
pif4	23	hAT	20.2	202
pif4	23	hAT	20.2	202
pif4	23	hAT	19.9	199
pif4	23	hAT	21	210
pif4	23	hAT	20	200
pif4	23	hAT	20.3	203
pif4	23	hAT	19.8	198
pif4	23	hAT	19.9	199
pif4	23	hAT	20.3	203
pif4	23	hAT	20.22	202.2
pif4	23	hAT	20.57	205.7
pif4	23	hAT	20.09	200.9
pif4	23	hAT	18.91	189.1

## Sheet: Primary_root_RGR_nAT
Plant Info	Time	Conditions	Root Length (mm)		Plant Info	Time	Conditions	Root Length (mm)	RGR (10-16)_nAT		Plant Info	Time	Conditions	Root Length (mm)	Plant Info	Time	Conditions	Root Length (mm)	RGR (18-21)_nAT
Col_0	10	nAT	28		Col_0	16	nAT	91	10.5		Col_0	18	nAT	67	Col_0	21	nAT	138	17.75
Col_0	10	nAT	32		Col_0	16	nAT	118	14.3333		Col_0	18	nAT	82	Col_0	21	nAT	162	20
Col_0	10	nAT	36		Col_0	16	nAT	101	10.8333		Col_0	18	nAT	69	Col_0	21	nAT	153	21
Col_0	10	nAT	38		Col_0	16	nAT	129	15.1667		Col_0	18	nAT	100	Col_0	21	nAT	182	20.5
Col_0	10	nAT	38		Col_0	16	nAT	119	13.5		Col_0	18	nAT	92	Col_0	21	nAT	166	18.5
Col_0	10	nAT	46		Col_0	16	nAT	128	13.6667		Col_0	18	nAT	95	Col_0	21	nAT	168	18.25
Col_0	10	nAT	35		Col_0	16	nAT	121.2	14.3667		Col_0	18	nAT	89	Col_0	21	nAT	165	19
Col_0	10	nAT	38		Col_0	16	nAT	128	15		Col_0	18	nAT	88	Col_0	21	nAT	168	20
Col_0	10	nAT	36		Col_0	16	nAT	136	16.6667		Col_0	18	nAT	97	Col_0	21	nAT	167	17.5
Col_0	10	nAT	33		Col_0	16	nAT	101	11.3333		Col_0	18	nAT	86	Col_0	21	nAT	145	14.75
Col_0	10	nAT	31		Col_0	16	nAT	89	9.66667		Col_0	18	nAT	90.8	Col_0	21	nAT	157	16.55
Col_0	10	nAT	49		Col_0	16	nAT	131	13.6667		Col_0	18	nAT	83	Col_0	21	nAT	164.4	20.35
Col_0	10	nAT	38		Col_0	16	nAT	119	13.5		Col_0	18	nAT	83	Col_0	21	nAT	167	21
35S::PIF4	10	nAT	35		35S::PIF4	16	nAT	92	9.5		35S::PIF4	18	nAT	80	35S::PIF4	21	nAT	126	11.5
35S::PIF4	10	nAT	32		35S::PIF4	16	nAT	104.4	12.0667		35S::PIF4	18	nAT	83	35S::PIF4	21	nAT	143	15
35S::PIF4	10	nAT	31		35S::PIF4	16	nAT	109	13		35S::PIF4	18	nAT	88	35S::PIF4	21	nAT	144	14
35S::PIF4	10	nAT	34		35S::PIF4	16	nAT	105	11.8333		35S::PIF4	18	nAT	82	35S::PIF4	21	nAT	141.2	14.8
35S::PIF4	10	nAT	33		35S::PIF4	16	nAT	100	11.1667		35S::PIF4	18	nAT	78	35S::PIF4	21	nAT	146	17
35S::PIF4	10	nAT	32		35S::PIF4	16	nAT	80	8		35S::PIF4	18	nAT	66	35S::PIF4	21	nAT	135.9	17.475
35S::PIF4	10	nAT	33		35S::PIF4	16	nAT	106	12.1667		35S::PIF4	18	nAT	88	35S::PIF4	21	nAT	117	7.25
35S::PIF4	10	nAT	31		35S::PIF4	16	nAT	122.2	15.2		35S::PIF4	18	nAT	95	35S::PIF4	21	nAT	161	16.5
35S::PIF4	10	nAT	34		35S::PIF4	16	nAT	95	10.1667		35S::PIF4	18	nAT	81	35S::PIF4	21	nAT	119	9.5
35S::PIF4	10	nAT	28		35S::PIF4	16	nAT	84	9.33333		35S::PIF4	18	nAT	53	35S::PIF4	21	nAT	105	13
35S::PIF4	10	nAT	24		35S::PIF4	16	nAT	66	7		35S::PIF4	18	nAT	51	35S::PIF4	21	nAT	104	13.25
35S::PIF4	10	nAT	27		35S::PIF4	16	nAT	120	15.5		35S::PIF4	18	nAT	91	35S::PIF4	21	nAT	157	16.5
35S::PIF4	10	nAT	24		35S::PIF4	16	nAT	88	10.6667		35S::PIF4	18	nAT	71.7	35S::PIF4	21	nAT	132	15.075
phyb	10	nAT	26		phyb	16	nAT	98	12		phyb	18	nAT	71	phyb	21	nAT	140	17.25
phyb	10	nAT	29		phyb	16	nAT	94	10.8333		phyb	18	nAT	74	phyb	21	nAT	156	20.5
phyb	10	nAT	27		phyb	16	nAT	102	12.5		phyb	18	nAT	80	phyb	21	nAT	154	18.5
phyb	10	nAT	26		phyb	16	nAT	74	8		phyb	18	nAT	55	phyb	21	nAT	107	13
phyb	10	nAT	33		phyb	16	nAT	106	12.1667		phyb	18	nAT	82	phyb	21	nAT	137	13.75
phyb	10	nAT	34		phyb	16	nAT	113.5	13.25		phyb	18	nAT	89	phyb	21	nAT	154	16.25
phyb	10	nAT	26		phyb	16	nAT	74	8		phyb	18	nAT	49	phyb	21	nAT	115	16.5
phyb	10	nAT	26		phyb	16	nAT	66	6.66667		phyb	18	nAT	45	phyb	21	nAT	101.1	14.025
phyb	10	nAT	19		phyb	16	nAT	91	12		phyb	18	nAT	69	phyb	21	nAT	128	14.75
phyb	10	nAT	22		phyb	16	nAT	103	13.5		phyb	18	nAT	82	phyb	21	nAT	151.1	17.275
phyb	10	nAT	25		phyb	16	nAT	84	9.83333		phyb	18	nAT	64	phyb	21	nAT	140	19
phyb	10	nAT	25		phyb	16	nAT	88	10.5		phyb	18	nAT	61	phyb	21	nAT	135	18.5
phyb	10	nAT	23		phyb	16	nAT	75.9	8.81667		phyb	18	nAT	52	phyb	21	nAT	105.9	13.475
pif4	10	nAT	32		pif4	16	nAT	62	5		pif4	18	nAT	69	pif4	21	nAT	114.5	11.375
pif4	10	nAT	29		pif4	16	nAT	115	14.3333		pif4	18	nAT	84	pif4	21	nAT	169	21.25
pif4	10	nAT	34		pif4	16	nAT	106	12		pif4	18	nAT	92	pif4	21	nAT	153	15.25
pif4	10	nAT	35		pif4	16	nAT	111.1	12.6833		pif4	18	nAT	85	pif4	21	nAT	147	15.5
pif4	10	nAT	30		pif4	16	nAT	99	11.5		pif4	18	nAT	77	pif4	21	nAT	164.5	21.875
pif4	10	nAT	28		pif4	16	nAT	117	14.8333		pif4	18	nAT	90	pif4	21	nAT	151.1	15.275
pif4	10	nAT	31		pif4	16	nAT	103	12		pif4	18	nAT	80	pif4	21	nAT	143.9	15.975
pif4	10	nAT	29		pif4	16	nAT	88	9.83333		pif4	18	nAT	87	pif4	21	nAT	126	9.75
pif4	10	nAT	32		pif4	16	nAT	112	13.3333		pif4	18	nAT	74	pif4	21	nAT	162	22
pif4	10	nAT	26		pif4	16	nAT	115	14.8333		pif4	18	nAT	69	pif4	21	nAT	158	22.25
pif4	10	nAT	32		pif4	16	nAT	97	10.8333		pif4	18	nAT	82	pif4	21	nAT	145	15.75
pif4	10	nAT	32		pif4	16	nAT	106	12.3333		pif4	18	nAT	80	pif4	21	nAT	167	21.75
pif4	10	nAT	34		pif4	16	nAT	104	11.6667		pif4	18	nAT	84	pif4	21	nAT	142	14.5

## Sheet: Primary root_RGR_hAT
Line	Time	Condition	Root Length (mm)	Line	Time	Condition	Root Length (mm)	RGR_(10-16)		Line	Time	Condition	Root Length (mm)	Line	Time	Condition	Root Length (mm)	RGR_(18-21)
Col_0	10	hAT	46	Col_0	16	hAT	143	16.1667		Col_0	18	hAT	107	Col_0	21	hAT	179	24
Col_0	10	hAT	45	Col_0	16	hAT	130	14.1667		Col_0	18	hAT	105	Col_0	21	hAT	181.6	25.5333
Col_0	10	hAT	39	Col_0	16	hAT	131	15.3333		Col_0	18	hAT	103	Col_0	21	hAT	178	25
Col_0	10	hAT	41	Col_0	16	hAT	124	13.8333		Col_0	18	hAT	105	Col_0	21	hAT	172.9	22.6333
Col_0	10	hAT	32	Col_0	16	hAT	103.3	11.8833		Col_0	18	hAT	89	Col_0	21	hAT	136.6	15.8667
Col_0	10	hAT	39	Col_0	16	hAT	98	9.83333		Col_0	18	hAT	77	Col_0	21	hAT	121.9	14.9667
Col_0	10	hAT	41	Col_0	16	hAT	127	14.3333		Col_0	18	hAT	99	Col_0	21	hAT	169	23.3333
Col_0	10	hAT	37	Col_0	16	hAT	131	15.6667		Col_0	18	hAT	98	Col_0	21	hAT	173	25
Col_0	10	hAT	28	Col_0	16	hAT	170	23.6667		Col_0	18	hAT	87	Col_0	21	hAT	210	41
Col_0	10	hAT	31	Col_0	16	hAT	148	19.5		Col_0	18	hAT	100.8	Col_0	21	hAT	169	22.7333
Col_0	10	hAT	36	Col_0	16	hAT	148	18.6667		Col_0	18	hAT	96	Col_0	21	hAT	174	26
Col_0	10	hAT	30	Col_0	16	hAT	141.4	18.5667		Col_0	18	hAT	110	Col_0	21	hAT	181.8	23.9333
Col_0	10	hAT	41	Col_0	16	hAT	127.5	14.4167		Col_0	18	hAT	108.9	Col_0	21	hAT	172	21.0333
phyb	10	hAT	29	phyb	16	hAT	118	14.8333		phyb	18	hAT	83	phyb	21	hAT	151	22.6667
phyb	10	hAT	34	phyb	16	hAT	140	17.6667		phyb	18	hAT	89	phyb	21	hAT	136	15.6667
phyb	10	hAT	30	phyb	16	hAT	71.6	6.93333		phyb	18	hAT	47	phyb	21	hAT	96	16.3333
phyb	10	hAT	24	phyb	16	hAT	84	10		phyb	18	hAT	59	phyb	21	hAT	122.4	21.1333
phyb	10	hAT	33	phyb	16	hAT	109	12.6667		phyb	18	hAT	88	phyb	21	hAT	158	23.3333
phyb	10	hAT	31	phyb	16	hAT	115.6	14.1		phyb	18	hAT	91	phyb	21	hAT	161.2	23.4
phyb	10	hAT	34	phyb	16	hAT	116	13.6667		phyb	18	hAT	72	phyb	21	hAT	145	24.3333
phyb	10	hAT	25	phyb	16	hAT	104	13.1667		phyb	18	hAT	89	phyb	21	hAT	129	13.3333
phyb	10	hAT	27	phyb	16	hAT	117	15		phyb	18	hAT	89	phyb	21	hAT	158	23
phyb	10	hAT	29	phyb	16	hAT	122	15.5		phyb	18	hAT	91	phyb	21	hAT	163	24
phyb	10	hAT	18	phyb	16	hAT	90	12		phyb	18	hAT	74	phyb	21	hAT	117	14.3333
phyb	10	hAT	22	phyb	16	hAT	86	10.6667		phyb	18	hAT	71.1	phyb	21	hAT	124	17.6333
phyb	10	hAT	23	phyb	16	hAT	93	11.6667		phyb	18	hAT	68	phyb	21	hAT	148	26.6667
35S::PIF4	10	hAT	33	35S::PIF4	16	hAT	130	16.1667		35S::PIF4	18	hAT	107	35S::PIF4	21	hAT	153	15.3333
35S::PIF4	10	hAT	32	35S::PIF4	16	hAT	115	13.8333		35S::PIF4	18	hAT	92	35S::PIF4	21	hAT	161	23
35S::PIF4	10	hAT	32	35S::PIF4	16	hAT	105	12.1667		35S::PIF4	18	hAT	95	35S::PIF4	21	hAT	144	16.3333
35S::PIF4	10	hAT	29	35S::PIF4	16	hAT	122	15.5		35S::PIF4	18	hAT	101.2	35S::PIF4	21	hAT	166	21.6
35S::PIF4	10	hAT	26	35S::PIF4	16	hAT	58	5.33333		35S::PIF4	18	hAT	46	35S::PIF4	21	hAT	68	7.33333
35S::PIF4	10	hAT	30	35S::PIF4	16	hAT	107	12.8333		35S::PIF4	18	hAT	90	35S::PIF4	21	hAT	151.6	20.5333
35S::PIF4	10	hAT	33	35S::PIF4	16	hAT	97	10.6667		35S::PIF4	18	hAT	95	35S::PIF4	21	hAT	132	12.3333
35S::PIF4	10	hAT	33	35S::PIF4	16	hAT	114	13.5		35S::PIF4	18	hAT	83	35S::PIF4	21	hAT	149	22
35S::PIF4	10	hAT	35	35S::PIF4	16	hAT	85	8.33333		35S::PIF4	18	hAT	75	35S::PIF4	21	hAT	96	7
35S::PIF4	10	hAT	34	35S::PIF4	16	hAT	121.5	14.5833		35S::PIF4	18	hAT	92	35S::PIF4	21	hAT	158	22
35S::PIF4	10	hAT	34	35S::PIF4	16	hAT	117	13.8333		35S::PIF4	18	hAT	90	35S::PIF4	21	hAT	180	30
35S::PIF4	10	hAT	27	35S::PIF4	16	hAT	96.4	11.5667		35S::PIF4	18	hAT	73	35S::PIF4	21	hAT	125	17.3333
35S::PIF4	10	hAT	31	35S::PIF4	16	hAT	110.4	13.2333		35S::PIF4	18	hAT	88	35S::PIF4	21	hAT	152	21.3333
pif4	10	hAT	36	pif4	16	hAT	107	11.8333		pif4	18	hAT	79	pif4	21	hAT	147	22.6667
pif4	10	hAT	38	pif4	16	hAT	133	15.8333		pif4	18	hAT	105.4	pif4	21	hAT	175	23.2
pif4	10	hAT	39	pif4	16	hAT	139	16.6667		pif4	18	hAT	106	pif4	21	hAT	183	25.6667
pif4	10	hAT	35	pif4	16	hAT	90	9.16667		pif4	18	hAT	72.7	pif4	21	hAT	129	18.7667
pif4	10	hAT	30	pif4	16	hAT	126	16		pif4	18	hAT	89	pif4	21	hAT	167	26
pif4	10	hAT	29	pif4	16	hAT	114	14.1667		pif4	18	hAT	99	pif4	21	hAT	153	18
pif4	10	hAT	30	pif4	16	hAT	126	16		pif4	18	hAT	89	pif4	21	hAT	158	23
pif4	10	hAT	32	pif4	16	hAT	126	15.6667		pif4	18	hAT	98	pif4	21	hAT	172	24.6667
pif4	10	hAT	30	pif4	16	hAT	127	16.1667		pif4	18	hAT	93.5	pif4	21	hAT	171.1	25.8667
pif4	10	hAT	30	pif4	16	hAT	103	12.1667		pif4	18	hAT	84	pif4	21	hAT	149	21.6667
pif4	10	hAT	22.6	pif4	16	hAT	148	20.9		pif4	18	hAT	114	pif4	21	hAT	190	25.3333
pif4	10	hAT	34	pif4	16	hAT	133	16.5		pif4	18	hAT	107	pif4	21	hAT	183	25.3333
pif4	10	hAT	37	pif4	16	hAT	142	17.5

## Sheet: Primary_root_RGR_(10-16)_Stat
Line_Condition	RGR (10-16)			Tukey multiple comparisons of means
Col_0_hAT	16.1667			95% family-wise confidence level
Col_0_hAT	14.1667
Col_0_hAT	15.3333			Fit: aov(formula = `RGR_(10_16)
Col_0_hAT	13.8333			Significant differences are highlighted
Col_0_hAT	11.8833
Col_0_hAT	9.83333			$Line_Condition	diff	lwr	upr	p adj
Col_0_hAT	14.3333			35S::PIF4_nAT-35S::PIF4_hAT	-1.22692	-4.54613	2.09228	0.944808
Col_0_hAT	15.6667			Col_0_hAT-35S::PIF4_hAT	3.42179	0.102591	6.741	0.0384066
Col_0_hAT	23.6667			Col_0_nAT-35S::PIF4_hAT	0.819231	-2.49997	4.13843	0.994485
Col_0_hAT	19.5			phyb_hAT-35S::PIF4_hAT	0.485897	-2.83331	3.8051	0.99981
Col_0_hAT	18.6667			phyb_nAT-35S::PIF4_hAT	-1.80641	-5.12561	1.51279	0.69586
Col_0_hAT	18.5667			pif4_hAT-35S::PIF4_hAT	2.84744	-0.471768	6.16664	0.148541
Col_0_hAT	14.4167			pif4_nAT-35S::PIF4_hAT	-0.489744	-3.80895	2.82946	0.9998
phyb_hAT	14.8333			Col_0_hAT-35S::PIF4_nAT	4.64872	1.32951	7.96792	0.0008945
phyb_hAT	17.6667			Col_0_nAT-35S::PIF4_nAT	2.04615	-1.27305	5.36536	0.547397
phyb_hAT	6.93333			phyb_hAT-35S::PIF4_nAT	1.71282	-1.60638	5.03202	0.749703
phyb_hAT	10			phyb_nAT-35S::PIF4_nAT	-0.579487	-3.89869	2.73972	0.999391
phyb_hAT	12.6667			pif4_hAT-35S::PIF4_nAT	4.07436	0.755155	7.39356	0.0059016
phyb_hAT	14.1			pif4_nAT-35S::PIF4_nAT	0.737179	-2.58202	4.05638	0.997137
phyb_hAT	13.6667			Col_0_nAT-Col_0_hAT	-2.60256	-5.92177	0.71664	0.239255
phyb_hAT	13.1667			phyb_hAT-Col_0_hAT	-2.9359	-6.2551	0.383306	0.123118
phyb_hAT	15			phyb_nAT-Col_0_hAT	-5.22821	-8.54741	-1.909	0.0001111
phyb_hAT	15.5			pif4_hAT-Col_0_hAT	-0.574359	-3.89356	2.74484	0.999426
phyb_hAT	12			pif4_nAT-Col_0_hAT	-3.91154	-7.23074	-0.592335	0.009698
phyb_hAT	10.6667			phyb_hAT-Col_0_nAT	-0.333333	-3.65254	2.98587	0.999985
phyb_hAT	11.6667			phyb_nAT-Col_0_nAT	-2.62564	-5.94484	0.693563	0.229382
35S::PIF4_hAT	16.1667			pif4_hAT-Col_0_nAT	2.02821	-1.291	5.34741	0.558699
35S::PIF4_hAT	13.8333			pif4_nAT-Col_0_nAT	-1.30897	-4.62818	2.01023	0.923417
35S::PIF4_hAT	12.1667			phyb_nAT-phyb_hAT	-2.29231	-5.61151	1.0269	0.397331
35S::PIF4_hAT	15.5			pif4_hAT-phyb_hAT	2.36154	-0.957665	5.68074	0.358299
35S::PIF4_hAT	5.33333			pif4_nAT-phyb_hAT	-0.975641	-4.29484	2.34356	0.98435
35S::PIF4_hAT	12.8333			pif4_hAT-phyb_nAT	4.65385	1.33464	7.97305	0.0008788
35S::PIF4_hAT	10.6667			pif4_nAT-phyb_nAT	1.31667	-2.00254	4.63587	0.921169
35S::PIF4_hAT	13.5			pif4_nAT-pif4_hAT	-3.33718	-6.65638	-0.0179757	0.0477729
35S::PIF4_hAT	8.33333
35S::PIF4_hAT	14.5833
35S::PIF4_hAT	13.8333
35S::PIF4_hAT	11.5667
35S::PIF4_hAT	13.2333
pif4_hAT	11.8333
pif4_hAT	15.8333
pif4_hAT	16.6667
pif4_hAT	9.16667
pif4_hAT	16
pif4_hAT	14.1667
pif4_hAT	16
pif4_hAT	15.6667
pif4_hAT	16.1667
pif4_hAT	12.1667
pif4_hAT	20.9
pif4_hAT	16.5
pif4_hAT	17.5
Col_0_nAT	10.5
Col_0_nAT	14.3333
Col_0_nAT	10.8333
Col_0_nAT	15.1667
Col_0_nAT	13.5
Col_0_nAT	13.6667
Col_0_nAT	14.3667
Col_0_nAT	15
Col_0_nAT	16.6667
Col_0_nAT	11.3333
Col_0_nAT	9.66667
Col_0_nAT	13.6667
Col_0_nAT	13.5
35S::PIF4_nAT	9.5
35S::PIF4_nAT	12.0667
35S::PIF4_nAT	13
35S::PIF4_nAT	11.8333
35S::PIF4_nAT	11.1667
35S::PIF4_nAT	8
35S::PIF4_nAT	12.1667
35S::PIF4_nAT	15.2
35S::PIF4_nAT	10.1667
35S::PIF4_nAT	9.33333
35S::PIF4_nAT	7
35S::PIF4_nAT	15.5
35S::PIF4_nAT	10.6667
phyb_nAT	12
phyb_nAT	10.8333
phyb_nAT	12.5
phyb_nAT	8
phyb_nAT	12.1667
phyb_nAT	13.25
phyb_nAT	8
phyb_nAT	6.66667
phyb_nAT	12
phyb_nAT	13.5
phyb_nAT	9.83333
phyb_nAT	10.5
phyb_nAT	8.81667
pif4_nAT	5
pif4_nAT	14.3333
pif4_nAT	12
pif4_nAT	12.6833
pif4_nAT	11.5
pif4_nAT	14.8333
pif4_nAT	12
pif4_nAT	9.83333
pif4_nAT	13.3333
pif4_nAT	14.8333
pif4_nAT	10.8333
pif4_nAT	12.3333
pif4_nAT	11.6667

## Sheet: Primary_root_RGR_(18-21)_Stat
Line_Condition	RGR (18-21)			Tukey multiple comparisons of means
Col_0_nAT	17.75			95% family-wise confidence level
Col_0_nAT	20				Fit: aov(formula = `RGR (18-21)` ~ Line_Condition, data = data)
Col_0_nAT	21			Significant differences are highlited
Col_0_nAT	20.5			Line_Condition	diff	lwr	upr	padj
Col_0_nAT	18.5			35S::PIF4_nAT-35S::PIF4_hAT	-4.25256	-9.42331	0.918185	0.188172
Col_0_nAT	18.25			Col_0_hAT-35S::PIF4_hAT	5.76154	0.590789	10.9323	0.0180692
Col_0_nAT	19			Col_0_nAT-35S::PIF4_hAT	0.69359	-4.47716	5.86434	0.999894
Col_0_nAT	20			phyb_hAT-35S::PIF4_hAT	2.28462	-2.88613	7.45536	0.868678
Col_0_nAT	17.5			phyb_nAT-35S::PIF4_hAT	-1.79679	-6.96754	3.37395	0.960072
Col_0_nAT	14.75			pif4_hAT-35S::PIF4_hAT	5.18312	-0.0942543	10.4605	0.057985
Col_0_nAT	16.55			pif4_nAT-35S::PIF4_hAT	-1.04872	-6.21947	4.12203	0.998388
Col_0_nAT	20.35			Col_0_hAT-35S::PIF4_nAT	10.0141	4.84335	15.1849	1e-06
Col_0_nAT	21			Col_0_nAT-35S::PIF4_nAT	4.94615	-0.224595	10.1169	0.0712978
35S::PIF4_nAT	11.5			phyb_hAT-35S::PIF4_nAT	6.53718	1.36643	11.7079	0.0040297
35S::PIF4_nAT	15			phyb_nAT-35S::PIF4_nAT	2.45577	-2.71498	7.62652	0.820179
35S::PIF4_nAT	14			pif4_hAT-35S::PIF4_nAT	9.43568	4.15831	14.7131	7.3e-06
35S::PIF4_nAT	14.8			pif4_nAT-35S::PIF4_nAT	3.20385	-1.9669	8.3746	0.540557
35S::PIF4_nAT	17			Col_0_nAT-Col_0_hAT	-5.06795	-10.2387	0.102801	0.0589538
35S::PIF4_nAT	17.475			phyb_hAT-Col_0_hAT	-3.47692	-8.64767	1.69383	0.432561
35S::PIF4_nAT	7.25			phyb_nAT-Col_0_hAT	-7.55833	-12.7291	-2.38758	0.0004412
35S::PIF4_nAT	16.5			pif4_hAT-Col_0_hAT	-0.578419	-5.85579	4.69896	0.999973
35S::PIF4_nAT	9.5			pif4_nAT-Col_0_hAT	-6.81026	-11.981	-1.63951	0.002285
35S::PIF4_nAT	13			phyb_hAT-Col_0_nAT	1.59103	-3.57972	6.76178	0.979613
35S::PIF4_nAT	13.25			phyb_nAT-Col_0_nAT	-2.49038	-7.66113	2.68036	0.809401
35S::PIF4_nAT	16.5			pif4_hAT-Col_0_nAT	4.48953	-0.787844	9.7669	0.155927
35S::PIF4_nAT	15.075			pif4_nAT-Col_0_nAT	-1.74231	-6.91306	3.42844	0.966192
phyb_nAT	17.25			phyb_nAT-phyb_hAT	-4.08141	-9.25216	1.08934	0.231666
phyb_nAT	20.5			pif4_hAT-phyb_hAT	2.8985	-2.37887	8.17588	0.685703
phyb_nAT	18.5			pif4_nAT-phyb_hAT	-3.33333	-8.50408	1.83742	0.488645
phyb_nAT	13			pif4_hAT-phyb_nAT	6.97991	1.70254	12.2573	0.0021507
phyb_nAT	13.75			pif4_nAT-phyb_nAT	0.748077	-4.42267	5.91883	0.999824
phyb_nAT	16.25			pif4_nAT-pif4_hAT	-6.23184	-11.5092	-0.954464	0.0094814
phyb_nAT	16.5
phyb_nAT	14.025
phyb_nAT	14.75
phyb_nAT	17.275
phyb_nAT	19
phyb_nAT	18.5
phyb_nAT	13.475
pif4_nAT	11.375
pif4_nAT	21.25
pif4_nAT	15.25
pif4_nAT	15.5
pif4_nAT	21.875
pif4_nAT	15.275
pif4_nAT	15.975
pif4_nAT	9.75
pif4_nAT	22
pif4_nAT	22.25
pif4_nAT	15.75
pif4_nAT	21.75
pif4_nAT	14.5
Col_0_hAT	24
Col_0_hAT	25.5333
Col_0_hAT	25
Col_0_hAT	22.6333
Col_0_hAT	15.8667
Col_0_hAT	14.9667
Col_0_hAT	23.3333
Col_0_hAT	25
Col_0_hAT	41
Col_0_hAT	22.7333
Col_0_hAT	26
Col_0_hAT	23.9333
Col_0_hAT	21.0333
phyb_hAT	22.6667
phyb_hAT	15.6667
phyb_hAT	16.3333
phyb_hAT	21.1333
phyb_hAT	23.3333
phyb_hAT	23.4
phyb_hAT	24.3333
phyb_hAT	13.3333
phyb_hAT	23
phyb_hAT	24
phyb_hAT	14.3333
phyb_hAT	17.6333
phyb_hAT	26.6667
35S::PIF4_hAT	15.3333
35S::PIF4_hAT	23
35S::PIF4_hAT	16.3333
35S::PIF4_hAT	21.6
35S::PIF4_hAT	7.33333
35S::PIF4_hAT	20.5333
35S::PIF4_hAT	12.3333
35S::PIF4_hAT	22
35S::PIF4_hAT	7
35S::PIF4_hAT	22
35S::PIF4_hAT	30
35S::PIF4_hAT	17.3333
35S::PIF4_hAT	21.3333
pif4_hAT	22.6667
pif4_hAT	23.2
pif4_hAT	25.6667
pif4_hAT	18.7667
pif4_hAT	26
pif4_hAT	18
pif4_hAT	23
pif4_hAT	24.6667
pif4_hAT	25.8667
pif4_hAT	21.6667
pif4_hAT	25.3333
pif4_hAT	25.3333

## Sheet: RGR(10-16)_vs_RGR(18-21)_Stat
Here are the results of the Welch Two Sample t-tests comparing the RGR values for the same Line_Conditions between the two sheets:
Col_0_nAT:
Mean of RGR (10-16): 13.24615
Mean of RGR (18-21): 18.85769
p-value: 1.856e-07 (significant)
35S::PIF4_nAT:
Mean of RGR (10-16): 11.20000
Mean of RGR (18-21): 13.91154
p-value: 0.02047 (significant)
phyb_nAT:
Mean of RGR (10-16): 10.62051
Mean of RGR (18-21): 16.36731
p-value: 1.49e-06 (significant)
pif4_nAT:
Mean of RGR (10-16): 11.93718
Mean of RGR (18-21): 17.11538
p-value: 0.001286 (significant)
Col_0_hAT:
Mean of RGR (10-16): 15.84872
Mean of RGR (18-21): 23.92564
p-value: 0.0006236 (significant)
phyb_hAT:
Mean of RGR (10-16): 12.91282
Mean of RGR (18-21): 20.44872
p-value: 3.818e-05 (significant)
35S::PIF4_hAT:
Mean of RGR (10-16): 12.42692
Mean of RGR (18-21): 18.16410
p-value: 0.01022 (significant)
pif4_hAT:
Mean of RGR (10-16): 15.27436
Mean of RGR (18-21): 23.34722
p-value: 2.756e-07 (significant)
These results indicate significant differences in RGR values between the two time periods (10-16 and 18-21) for all the specified Line_Conditions

## Sheet: laterla root density
genotype	treatment	density
35S::PIF4	hAT	1.47208
35S::PIF4	hAT	1.58273
35S::PIF4	hAT	1.02041
35S::PIF4	hAT	1.50259
35S::PIF4	hAT	2.10256
35S::PIF4	hAT	0.962567
35S::PIF4	hAT	1.27551
35S::PIF4	hAT	1.08247
35S::PIF4	hAT	1.94286
35S::PIF4	hAT	2.19251
35S::PIF4	hAT	1.78378
35S::PIF4	hAT	2.07071
35S::PIF4	hAT	2.16667
35S::PIF4	hAT	1.32979
35S::PIF4	hAT	1.61491
35S::PIF4	hAT	1.32275
35S::PIF4	hAT	1.58906
35S::PIF4	nAT	2.01058
35S::PIF4	nAT	2.29765
35S::PIF4	nAT	1.65048
35S::PIF4	nAT	1.97969
35S::PIF4	nAT	1.84615
35S::PIF4	nAT	1.08434
35S::PIF4	nAT	1.82796
35S::PIF4	nAT	2.1256
35S::PIF4	nAT	1.51832
35S::PIF4	nAT	2.35897
35S::PIF4	nAT	1.54639
35S::PIF4	nAT	1.87879
35S::PIF4	nAT	1.55556
35S::PIF4	nAT	1.89474
35S::PIF4	nAT	1.58163
35S::PIF4	nAT	1.125
35S::PIF4	nAT	1.76762
Col	hAT	2.26267
Col	hAT	1.92708
Col	hAT	1.97917
Col	hAT	2.27979
Col	hAT	1.75258
Col	hAT	1.125
Col	hAT	1.6
Col	hAT	2
Col	hAT	2.26316
Col	hAT	1.62437
Col	hAT	1.2
Col	hAT	1.22449
Col	hAT	1.28205
Col	hAT	0.738916
Col	hAT	1.3
Col	hAT	1.23809
Col	hAT	1.61234
Col	nAT	2.22913
Col	nAT	2.09756
Col	nAT	1.5
Col	nAT	2.57143
Col	nAT	2.5641
Col	nAT	2.33645
Col	nAT	2.36181
Col	nAT	2.67606
Col	nAT	2.22913
Col	nAT	2.09756
Col	nAT	1.5
Col	nAT	2.57143
Col	nAT	2.5641
Col	nAT	2.33645
Col	nAT	2.36181
Col	nAT	2.67606
Col	nAT	2.29207
phyb	hAT	1.24352
phyb	hAT	1.29412
phyb	hAT	1.5
phyb	hAT	0.847458
phyb	hAT	1.38614
phyb	hAT	0.95
phyb	hAT	1.36905
phyb	hAT	0.483871
phyb	hAT	0.85
phyb	hAT	0.869565
phyb	hAT	1.08844
phyb	hAT	0.197368
phyb	hAT	0.510204
phyb	hAT	1.47651
phyb	hAT	0.95
phyb	hAT	1.20603
phyb	hAT	1.01389
phyb	nAT	1.52632
phyb	nAT	1.45
phyb	nAT	2.46446
phyb	nAT	0.251256
phyb	nAT	2.1
phyb	nAT	2
phyb	nAT	1.43678
phyb	nAT	0.54878
phyb	nAT	1.76768
phyb	nAT	2.41026
phyb	nAT	1.30653
phyb	nAT	1.40244
phyb	nAT	2.05405
phyb	nAT	1.06599
phyb	nAT	1.19792
phyb	nAT	1.63158
phyb	nAT	1.53838
pif4	hAT	1.68317
pif4	hAT	1.83168
pif4	hAT	1.80905
pif4	hAT	1.44444
pif4	hAT	2.05
pif4	hAT	1.33005
pif4	hAT	1.31313
pif4	hAT	1.50754
pif4	hAT	1.35678
pif4	hAT	1.61616
pif4	hAT	1.70854
pif4	hAT	1.3587
pif4	hAT	1.35
pif4	hAT	0.862944
pif4	hAT	1.15385
pif4	hAT	1.15789
pif4	hAT	1.47087
pif4	nAT	1.92893
pif4	nAT	2.07447
pif4	nAT	2.69608
pif4	nAT	2.22798
pif4	nAT	2.68041
pif4	nAT	2.55
pif4	nAT	1.8
pif4	nAT	2.02128
pif4	nAT	1.85393
pif4	nAT	2.09524
pif4	nAT	1.83962
pif4	nAT	2.01005
pif4	nAT	1.8593
pif4	nAT	2.71282
pif4	nAT	1.95122
pif4	nAT	1.56757
pif4	nAT	2.11681

## Sheet: lateral root length
genotype	Plant ID	treatment	length
Col	1	nAT	7.1
Col	1	nAT	5.1
Col	1	nAT	5
Col	1	nAT	4.3
Col	2	nAT	5
Col	2	nAT	5
Col	2	nAT	4.4
Col	2	nAT	4.3
Col	3	nAT	4.6
Col	3	nAT	2.4
Col	3	nAT	2.6
Col	3	nAT	2.1
Col	4	nAT	12
Col	4	nAT	5.2
Col	4	nAT	6
Col	4	nAT	3.4
Col	5	nAT	9
Col	5	nAT	2.5
Col	5	nAT	3
Col	5	nAT	2.9
Col	6	nAT	4.2
Col	6	nAT	6
Col	6	nAT	7.5
Col	6	nAT	5
Col	7	nAT	3.1
Col	7	nAT	3.5
Col	7	nAT	2.6
Col	7	nAT	2.7
Col	8	nAT	5.3
Col	8	nAT	2.7
Col	8	nAT	3.1
Col	8	nAT	3.3
Col	1	hAT	14
Col	1	hAT	13.8
Col	1	hAT	9.5
Col	1	hAT	8.1
Col	2	hAT	10.2
Col	2	hAT	7.2
Col	2	hAT	9.9
Col	2	hAT	6.1
Col	3	hAT	17.2
Col	3	hAT	11.8
Col	3	hAT	7.8
Col	3	hAT	8
Col	4	hAT	12
Col	4	hAT	9.8
Col	4	hAT	10.8
Col	4	hAT	11.4
Col	5	hAT	10.4
Col	5	hAT	9.7
Col	5	hAT	9.9
Col	5	hAT	10
Col	6	hAT	10.5
Col	6	hAT	6.7
Col	6	hAT	7
Col	6	hAT	4.3
Col	7	hAT	9.5
Col	7	hAT	7.4
Col	7	hAT	7.1
Col	7	hAT	7.7
Col	8	hAT	7.6
Col	8	hAT	8.6
Col	8	hAT	12.2
Col	8	hAT	5.3
phyb	1	nAT	5.1
phyb	1	nAT	4.3
phyb	1	nAT	3.9
phyb	1	nAT	3.9
phyb	2	nAT	6.8
phyb	2	nAT	6
phyb	2	nAT	2.8
phyb	2	nAT	2.7
phyb	3	nAT	5.3
phyb	3	nAT	4.7
phyb	3	nAT	4.6
phyb	3	nAT	4.5
phyb	4	nAT	3.5
phyb	4	nAT	2.6
phyb	4	nAT	3.7
phyb	4	nAT	2.1
phyb	5	nAT	5.5
phyb	5	nAT	6.1
phyb	5	nAT	5.5
phyb	5	nAT	3.9
phyb	6	nAT	9.7
phyb	6	nAT	8.1
phyb	6	nAT	6.2
phyb	6	nAT	3
phyb	7	nAT	10.6
phyb	7	nAT	2.3
phyb	7	nAT	4.7
phyb	7	nAT	1.7
phyb	8	nAT	1.9
phyb	8	nAT	4.3
phyb	8	nAT	2.2
phyb	8	nAT	1.4
phyb	1	hAT	7.2
phyb	1	hAT	8.6
phyb	1	hAT	9
phyb	1	hAT	7.4
phyb	2	hAT	7.2
phyb	2	hAT	7.1
phyb	2	hAT	6.3
phyb	2	hAT	5.8
phyb	3	hAT	9.9
phyb	3	hAT	3.2
phyb	3	hAT	3.3
phyb	3	hAT	2.9
phyb	4	hAT	2
phyb	4	hAT	1.4
phyb	4	hAT	2.1
phyb	4	hAT
phyb	5	hAT	7.8
phyb	5	hAT	7.7
phyb	5	hAT	4.5
phyb	5	hAT	4.9
phyb	6	hAT	6.6
phyb	6	hAT	8.2
phyb	6	hAT	7.4
phyb	6	hAT	5.7
phyb	7	hAT	8.1
phyb	7	hAT	5.6
phyb	7	hAT	7.3
phyb	7	hAT	7.4
35S::PIF4	1	nAT	5.8
35S::PIF4	1	nAT	6.6
35S::PIF4	1	nAT	3.8
35S::PIF4	1	nAT	4.8
35S::PIF4	2	nAT	5.1
35S::PIF4	2	nAT	3.6
35S::PIF4	2	nAT	5.2
35S::PIF4	2	nAT	4.1
35S::PIF4	3	nAT	3.8
35S::PIF4	3	nAT	10.2
35S::PIF4	3	nAT	5.2
35S::PIF4	3	nAT	4.9
35S::PIF4	4	nAT	6.3
35S::PIF4	4	nAT	6.11
35S::PIF4	4	nAT	5.6
35S::PIF4	4	nAT	3.9
35S::PIF4	5	nAT	5.1
35S::PIF4	5	nAT	6.5
35S::PIF4	5	nAT	7.3
35S::PIF4	5	nAT	4.2
35S::PIF4	6	nAT	2.7
35S::PIF4	6	nAT	3.5
35S::PIF4	6	nAT	2.3
35S::PIF4	6	nAT	2.9
35S::PIF4	7	nAT	9.6
35S::PIF4	7	nAT	5.5
35S::PIF4	7	nAT	5.3
35S::PIF4	7	nAT	6.4
35S::PIF4	8	nAT	6
35S::PIF4	8	nAT	6
35S::PIF4	8	nAT	3.5
35S::PIF4	8	nAT	3.4
35S::PIF4	1	hAT	7.8
35S::PIF4	1	hAT	8.5
35S::PIF4	1	hAT	9.3
35S::PIF4	1	hAT	5.6
35S::PIF4	2	hAT	14.9
35S::PIF4	2	hAT	13.5
35S::PIF4	2	hAT	8.7
35S::PIF4	2	hAT	11
35S::PIF4	3	hAT	8.9
35S::PIF4	3	hAT	6.2
35S::PIF4	3	hAT	8.2
35S::PIF4	3	hAT	6.6
35S::PIF4	4	hAT	7.6
35S::PIF4	4	hAT	10.9
35S::PIF4	4	hAT	7.8
35S::PIF4	4	hAT	6.8
35S::PIF4	6	hAT	9.5
35S::PIF4	6	hAT	7.6
35S::PIF4	6	hAT	7.9
35S::PIF4	6	hAT	6.1
35S::PIF4	7	hAT	7.7
35S::PIF4	7	hAT	7.3
35S::PIF4	7	hAT	4.9
35S::PIF4	7	hAT	4.2
35S::PIF4	8	hAT	7.7
35S::PIF4	8	hAT	8.1
35S::PIF4	8	hAT	5.9
35S::PIF4	8	hAT	7.5
pif4	1	nAT	4.3
pif4	1	nAT	3.5
pif4	1	nAT	3.9
pif4	1	nAT	2.5
pif4	2	nAT	4.7
pif4	2	nAT	9.9
pif4	2	nAT	3.7
pif4	2	nAT	4.2
pif4	3	nAT	4.2
pif4	3	nAT	5.6
pif4	3	nAT	6.6
pif4	3	nAT	5.3
pif4	4	nAT	5.6
pif4	4	nAT	6
pif4	4	nAT	3.5
pif4	4	nAT	3.7
pif4	5	nAT	2.5
pif4	5	nAT	2.1
pif4	5	nAT	1.6
pif4	5	nAT	1.7
pif4	6	nAT	5.3
pif4	6	nAT	5.2
pif4	6	nAT	7.7
pif4	6	nAT	6.9
pif4	7	nAT	5.7
pif4	7	nAT	5.1
pif4	7	nAT	4
pif4	7	nAT	3.5
pif4	8	nAT	4.2
pif4	8	nAT	2.9
pif4	8	nAT	2.7
pif4	8	nAT	2
pif4	1	hAT	5.1
pif4	1	hAT	6.8
pif4	1	hAT	8.1
pif4	1	hAT	7.1
pif4	2	hAT	10.6
pif4	2	hAT	8.9
pif4	2	hAT	7
pif4	2	hAT	7.1
pif4	3	hAT	11.4
pif4	3	hAT	8.7
pif4	3	hAT	7.7
pif4	3	hAT	10.6
pif4	4	hAT	14.3
pif4	4	hAT	5.6
pif4	4	hAT	4.5
pif4	4	hAT	4
pif4	5	hAT	12.2
pif4	5	hAT	10.7
pif4	5	hAT	10.3
pif4	5	hAT	7.5
pif4	6	hAT	9.19
pif4	6	hAT	12
pif4	6	hAT	7.4
pif4	6	hAT	5.8
pif4	7	hAT	12.8
pif4	7	hAT	8.2
pif4	7	hAT	11.17
pif4	7	hAT	8.9
pif4	8	hAT	10.45
pif4	8	hAT	7.2
pif4	8	hAT	5.7
pif4	8	hAT	6

## Sheet: total root length_nAT
Plant Info	Conditions	Time-Points	TOTAL_LENGTH (mm)
35S::PIF4	nAT	10	201.53
35S::PIF4	nAT	10	91.52
35S::PIF4	nAT	10	99.72
35S::PIF4	nAT	10	142.25
35S::PIF4	nAT	10	139.61
35S::PIF4	nAT	10	222.84
35S::PIF4	nAT	10	230.13
35S::PIF4	nAT	10	145.07
35S::PIF4	nAT	10	98.35
35S::PIF4	nAT	10	258.09
35S::PIF4	nAT	10	66.02
35S::PIF4	nAT	10	121.67
35S::PIF4	nAT	10	128.04
35S::PIF4	nAT	10	231.31
35S::PIF4	nAT	10	196.25
35S::PIF4	nAT	10	174.49
35S::PIF4	nAT	10	152.72
35S::PIF4	nAT	10	65.11
35S::PIF4	nAT	10	95.26
35S::PIF4	nAT	10	108.1
35S::PIF4	nAT	10	227.4
35S::PIF4	nAT	14	185.23
35S::PIF4	nAT	14	280.76
35S::PIF4	nAT	14	115.84
35S::PIF4	nAT	14	121.39
35S::PIF4	nAT	14	140.06
35S::PIF4	nAT	14	215.74
35S::PIF4	nAT	14	150.81
35S::PIF4	nAT	14	195.52
35S::PIF4	nAT	14	285.04
35S::PIF4	nAT	14	177.04
35S::PIF4	nAT	14	291.78
35S::PIF4	nAT	14	195.52
35S::PIF4	nAT	14	268.65
35S::PIF4	nAT	14	129.86
35S::PIF4	nAT	14	293.97
35S::PIF4	nAT	14	80.41
35S::PIF4	nAT	14	158.64
35S::PIF4	nAT	14	194.25
35S::PIF4	nAT	14	216.74
35S::PIF4	nAT	14	246.52
35S::PIF4	nAT	14	193.15
35S::PIF4	nAT	16	221.29
35S::PIF4	nAT	16	349.34
35S::PIF4	nAT	16	193.43
35S::PIF4	nAT	16	171.84
35S::PIF4	nAT	16	210.46
35S::PIF4	nAT	16	280.03
35S::PIF4	nAT	16	215.74
35S::PIF4	nAT	16	250.71
35S::PIF4	nAT	16	310.81
35S::PIF4	nAT	16	257.99
35S::PIF4	nAT	16	347.7
35S::PIF4	nAT	16	221.75
35S::PIF4	nAT	16	326.39
35S::PIF4	nAT	16	171.12
35S::PIF4	nAT	16	320.38
35S::PIF4	nAT	16	87.06
35S::PIF4	nAT	16	174.03
35S::PIF4	nAT	16	278.12
35S::PIF4	nAT	16	291.05
35S::PIF4	nAT	16	318.1
35S::PIF4	nAT	16	244.88
35S::PIF4	nAT	18	198.98
35S::PIF4	nAT	18	389.22
35S::PIF4	nAT	18	275.21
35S::PIF4	nAT	18	244.52
35S::PIF4	nAT	18	317.19
35S::PIF4	nAT	18	393.32
35S::PIF4	nAT	18	147.35
35S::PIF4	nAT	18	334.95
35S::PIF4	nAT	18	378.2
35S::PIF4	nAT	18	276.48
35S::PIF4	nAT	18	434.58
35S::PIF4	nAT	18	272.75
35S::PIF4	nAT	18	308.17
35S::PIF4	nAT	18	296.24
35S::PIF4	nAT	18	442.77
35S::PIF4	nAT	18	156
35S::PIF4	nAT	18	256.99
35S::PIF4	nAT	18	382.39
35S::PIF4	nAT	18	384.4
35S::PIF4	nAT	18	459.89
35S::PIF4	nAT	18	266.28
35S::PIF4	nAT	21	526.19
35S::PIF4	nAT	21	274.11
35S::PIF4	nAT	21	507.61
35S::PIF4	nAT	21	555.06
35S::PIF4	nAT	21	375.11
35S::PIF4	nAT	21	508.16
35S::PIF4	nAT	21	726.36
35S::PIF4	nAT	21	222.84
35S::PIF4	nAT	21	574.27
35S::PIF4	nAT	21	544.77
35S::PIF4	nAT	21	457.8
35S::PIF4	nAT	21	565.08
35S::PIF4	nAT	21	481.93
35S::PIF4	nAT	21	417.27
35S::PIF4	nAT	21	528.37
35S::PIF4	nAT	21	548.41
35S::PIF4	nAT	21	295.97
35S::PIF4	nAT	21	522.55
35S::PIF4	nAT	21	599.68
35S::PIF4	nAT	21	772.53
35S::PIF4	nAT	21	313.46
35S::PIF4	nAT	23	423.65
35S::PIF4	nAT	23	726.9
35S::PIF4	nAT	23	855.13
35S::PIF4	nAT	23	518.63
35S::PIF4	nAT	23	826.26
35S::PIF4	nAT	23	1117.76
35S::PIF4	nAT	23	310.72
35S::PIF4	nAT	23	824.07
35S::PIF4	nAT	23	681.1
35S::PIF4	nAT	23	602.59
35S::PIF4	nAT	23	750.12
35S::PIF4	nAT	23	627.64
35S::PIF4	nAT	23	503.15
35S::PIF4	nAT	23	777.63
35S::PIF4	nAT	23	685.47
35S::PIF4	nAT	23	441.31
35S::PIF4	nAT	23	764.42
35S::PIF4	nAT	23	926.34
35S::PIF4	nAT	23	661.06
35S::PIF4	nAT	23	1018.96
35S::PIF4	nAT	23	421.19
Col-0	nAT	10	190.06
Col-0	nAT	10	136.06
Col-0	nAT	10	172.39
Col-0	nAT	10	108.64
Col-0	nAT	10	206
Col-0	nAT	10	119.12
Col-0	nAT	10	172.3
Col-0	nAT	10	119.12
Col-0	nAT	10	369.28
Col-0	nAT	10	144.98
Col-0	nAT	10	186.23
Col-0	nAT	10	135.51
Col-0	nAT	10	198.07
Col-0	nAT	10	103
Col-0	nAT	10	133.69
Col-0	nAT	10	121.03
Col-0	nAT	10	80.69
Col-0	nAT	10	140.79
Col-0	nAT	10	90.07
Col-0	nAT	10	118.93
Col-0	nAT	10	153.54
Col-0	nAT	14	110.74
Col-0	nAT	14	191.52
Col-0	nAT	14	209.18
Col-0	nAT	14	151.17
Col-0	nAT	14	224.94
Col-0	nAT	14	167.47
Col-0	nAT	14	102.82
Col-0	nAT	14	286.41
Col-0	nAT	14	155.09
Col-0	nAT	14	133.78
Col-0	nAT	14	269.83
Col-0	nAT	14	234.23
Col-0	nAT	14	199.8
Col-0	nAT	14	488.76
Col-0	nAT	14	199.53
Col-0	nAT	14	243.79
Col-0	nAT	14	192.15
Col-0	nAT	14	266.01
Col-0	nAT	14	159.19
Col-0	nAT	14	223.66
Col-0	nAT	14	211.19
Col-0	nAT	16	142.89
Col-0	nAT	16	252.99
Col-0	nAT	16	311.45
Col-0	nAT	16	234.14
Col-0	nAT	16	303.44
Col-0	nAT	16	247.07
Col-0	nAT	16	147.35
Col-0	nAT	16	315.64
Col-0	nAT	16	202.35
Col-0	nAT	16	159.73
Col-0	nAT	16	330.67
Col-0	nAT	16	290.14
Col-0	nAT	16	194.7
Col-0	nAT	16	556.24
Col-0	nAT	16	215.19
Col-0	nAT	16	326.57
Col-0	nAT	16	290.6
Col-0	nAT	16	326.66
Col-0	nAT	16	232.13
Col-0	nAT	16	270.84
Col-0	nAT	16	289.32
Col-0	nAT	18	198.25
Col-0	nAT	18	321.29
Col-0	nAT	18	526.46
Col-0	nAT	18	235.87
Col-0	nAT	18	446.05
Col-0	nAT	18	411.44
Col-0	nAT	18	201.9
Col-0	nAT	18	420.64
Col-0	nAT	18	315.09
Col-0	nAT	18	242.15
Col-0	nAT	18	464.54
Col-0	nAT	18	469.82
Col-0	nAT	18	239.69
Col-0	nAT	18	636.2
Col-0	nAT	18	337.22
Col-0	nAT	18	469.27
Col-0	nAT	18	445.32
Col-0	nAT	18	414.63
Col-0	nAT	18	364.73
Col-0	nAT	18	396.33
Col-0	nAT	18	389.95
Col-0	nAT	21	366.91
Col-0	nAT	21	568.08
Col-0	nAT	21	921.06
Col-0	nAT	21	327.21
Col-0	nAT	21	710.97
Col-0	nAT	21	859.77
Col-0	nAT	21	727.18
Col-0	nAT	21	366.37
Col-0	nAT	21	644.21
Col-0	nAT	21	585.57
Col-0	nAT	21	361.9
Col-0	nAT	21	851.94
Col-0	nAT	21	794.2
Col-0	nAT	21	377.75
Col-0	nAT	21	856.58
Col-0	nAT	21	671.17
Col-0	nAT	21	807.86
Col-0	nAT	21	873.07
Col-0	nAT	21	712.24
Col-0	nAT	21	659.42
Col-0	nAT	21	806.22
Col-0	nAT	23	553.24
Col-0	nAT	23	933.35
Col-0	nAT	23	1257.46
Col-0	nAT	23	443.86
Col-0	nAT	23	1063.4
Col-0	nAT	23	1245.9
Col-0	nAT	23	525.92
Col-0	nAT	23	838.1
Col-0	nAT	23	853.76
Col-0	nAT	23	593.76
Col-0	nAT	23	1168.03
Col-0	nAT	23	1101.83
Col-0	nAT	23	692.21
Col-0	nAT	23	1157.65
Col-0	nAT	23	964.68
Col-0	nAT	23	1081.16
Col-0	nAT	23	1162.66
Col-0	nAT	23	949.65
Col-0	nAT	23	966.87
Col-0	nAT	23	1116.31
Col-0	nAT	23	1150.19
phyb	nAT	10	199.44
phyb	nAT	10	211.64
phyb	nAT	10	234.5
phyb	nAT	10	143.7
phyb	nAT	10	173.94
phyb	nAT	10	155.45
phyb	nAT	10	197.8
phyb	nAT	10	154.54
phyb	nAT	10	139.52
phyb	nAT	10	166.93
phyb	nAT	10	151.63
phyb	nAT	10	146.89
phyb	nAT	10	72.85
phyb	nAT	10	206.54
phyb	nAT	10	109.1
phyb	nAT	10	123.21
phyb	nAT	10	69.12
phyb	nAT	10	65.57
phyb	nAT	10	96.71
phyb	nAT	10	84.69
phyb	nAT	10	47.36
phyb	nAT	14	77.77
phyb	nAT	14	218.11
phyb	nAT	14	261.09
phyb	nAT	14	102.91
phyb	nAT	14	287.32
phyb	nAT	14	153.54
phyb	nAT	14	111.92
phyb	nAT	14	249.43
phyb	nAT	14	217.93
phyb	nAT	14	85.79
phyb	nAT	14	251.98
phyb	nAT	14	144.25
phyb	nAT	14	73.13
phyb	nAT	14	198.16
phyb	nAT	14	257.45
phyb	nAT	14	236.59
phyb	nAT	14	260
phyb	nAT	14	100.08
phyb	nAT	14	236.41
phyb	nAT	14	180.5
phyb	nAT	14	145.89
phyb	nAT	16	105.55
phyb	nAT	16	249.16
phyb	nAT	16	274.11
phyb	nAT	16	146.35
phyb	nAT	16	311.18
phyb	nAT	16	170.93
phyb	nAT	16	128.31
phyb	nAT	16	334.67
phyb	nAT	16	282.31
phyb	nAT	16	129.86
phyb	nAT	16	233.13
phyb	nAT	16	247.25
phyb	nAT	16	119.03
phyb	nAT	16	213.92
phyb	nAT	16	252.8
phyb	nAT	16	276.03
phyb	nAT	16	287.96
phyb	nAT	16	138.7
phyb	nAT	16	267.74
phyb	nAT	16	175.85
phyb	nAT	16	187.6
phyb	nAT	18	110.74
phyb	nAT	18	316.82
phyb	nAT	18	273.75
phyb	nAT	18	229.22
phyb	nAT	18	355.62
phyb	nAT	18	263.19
phyb	nAT	18	184.14
phyb	nAT	18	438.13
phyb	nAT	18	287.59
phyb	nAT	18	178.58
phyb	nAT	18	347.15
phyb	nAT	18	308.81
phyb	nAT	18	148.08
phyb	nAT	18	295.33
phyb	nAT	18	302.44
phyb	nAT	18	365.64
phyb	nAT	18	371.1
phyb	nAT	18	205.18
phyb	nAT	18	340.87
phyb	nAT	18	261.27
phyb	nAT	18	289.69
phyb	nAT	21	239.51
phyb	nAT	21	536.02
phyb	nAT	21	507.52
phyb	nAT	21	429.2
phyb	nAT	21	591.21
phyb	nAT	21	482.84
phyb	nAT	21	539.67
phyb	nAT	21	317.64
phyb	nAT	21	762.05
phyb	nAT	21	472.91
phyb	nAT	21	341.87
phyb	nAT	21	473.55
phyb	nAT	21	418.64
phyb	nAT	21	285.13
phyb	nAT	21	592.3
phyb	nAT	21	566.17
phyb	nAT	21	752.4
phyb	nAT	21	392.41
phyb	nAT	21	415.91
phyb	nAT	21	345.15
phyb	nAT	21	423.46
phyb	nAT	23	339.23
phyb	nAT	23	700.31
phyb	nAT	23	729.09
phyb	nAT	23	560.07
phyb	nAT	23	821.25
phyb	nAT	23	699.67
phyb	nAT	23	430.57
phyb	nAT	23	1034.8
phyb	nAT	23	609.52
phyb	nAT	23	477.56
phyb	nAT	23	646.4
phyb	nAT	23	602.69
phyb	nAT	23	538.39
phyb	nAT	23	959.31
phyb	nAT	23	818.43
phyb	nAT	23	1134.79
phyb	nAT	23	725.17
phyb	nAT	23	618.62
phyb	nAT	23	492.04
phyb	nAT	23	491.13
phyb	nAT	23	622.27
pif4	nAT	10	73.4
pif4	nAT	10	244.24
pif4	nAT	10	115.56
pif4	nAT	10	203.35
pif4	nAT	10	149.53
pif4	nAT	10	98.63
pif4	nAT	10	315.73
pif4	nAT	10	152.54
pif4	nAT	10	194.61
pif4	nAT	10	181.04
pif4	nAT	10	101.72
pif4	nAT	10	151.17
pif4	nAT	10	244.7
pif4	nAT	10	94.35
pif4	nAT	10	142.89
pif4	nAT	10	283.58
pif4	nAT	10	108.1
pif4	nAT	10	95.62
pif4	nAT	10	93.62
pif4	nAT	10	109.92
pif4	nAT	10	30.6
pif4	nAT	14	156.82
pif4	nAT	14	105.18
pif4	nAT	14	354.34
pif4	nAT	14	133.78
pif4	nAT	14	201.99
pif4	nAT	14	281.13
pif4	nAT	14	148.99
pif4	nAT	14	217.83
pif4	nAT	14	143.7
pif4	nAT	14	175.67
pif4	nAT	14	364.91
pif4	nAT	14	172.39
pif4	nAT	14	65.75
pif4	nAT	14	328.85
pif4	nAT	14	266.92
pif4	nAT	14	160.1
pif4	nAT	14	269.74
pif4	nAT	14	327.21
pif4	nAT	14	149.17
pif4	nAT	14	193.15
pif4	nAT	14	308.99
pif4	nAT	16	190.7
pif4	nAT	16	96.9
pif4	nAT	16	462.81
pif4	nAT	16	164.1
pif4	nAT	16	278.03
pif4	nAT	16	304.89
pif4	nAT	16	170.39
pif4	nAT	16	309.17
pif4	nAT	16	231.77
pif4	nAT	16	260.36
pif4	nAT	16	391.59
pif4	nAT	16	244.43
pif4	nAT	16	134.32
pif4	nAT	16	338.32
pif4	nAT	16	286.77
pif4	nAT	16	249.43
pif4	nAT	16	343.23
pif4	nAT	16	381.85
pif4	nAT	16	173.39
pif4	nAT	16	230.67
pif4	nAT	16	330.39
pif4	nAT	18	234.86
pif4	nAT	18	127.86
pif4	nAT	18	551.69
pif4	nAT	18	242.97
pif4	nAT	18	374.38
pif4	nAT	18	358.62
pif4	nAT	18	232.4
pif4	nAT	18	427.29
pif4	nAT	18	366.73
pif4	nAT	18	323.02
pif4	nAT	18	534.02
pif4	nAT	18	417.27
pif4	nAT	18	112.1
pif4	nAT	18	366.55
pif4	nAT	18	404.43
pif4	nAT	18	452.79
pif4	nAT	18	509.89
pif4	nAT	18	469.82
pif4	nAT	18	245.88
pif4	nAT	18	255.44
pif4	nAT	18	416.54
pif4	nAT	21	367.18
pif4	nAT	21	306.35
pif4	nAT	21	843.47
pif4	nAT	21	469
pif4	nAT	21	691.93
pif4	nAT	21	508.43
pif4	nAT	21	420.37
pif4	nAT	21	733.82
pif4	nAT	21	610.06
pif4	nAT	21	586.11
pif4	nAT	21	789.74
pif4	nAT	21	641.75
pif4	nAT	21	205.45
pif4	nAT	21	502.24
pif4	nAT	21	723.9
pif4	nAT	21	850.21
pif4	nAT	21	866.6
pif4	nAT	21	742.11
pif4	nAT	21	507.88
pif4	nAT	21	421.73
pif4	nAT	21	469.18
pif4	nAT	23	552.96
pif4	nAT	23	453.88
pif4	nAT	23	1174.04
pif4	nAT	23	651.68
pif4	nAT	23	1111.12
pif4	nAT	23	739.47
pif4	nAT	23	569.99
pif4	nAT	23	1104.65
pif4	nAT	23	798.66
pif4	nAT	23	764.88
pif4	nAT	23	1077.33
pif4	nAT	23	960.4
pif4	nAT	23	322.11
pif4	nAT	23	703.86
pif4	nAT	23	1130.88
pif4	nAT	23	1363.37
pif4	nAT	23	1126.14
pif4	nAT	23	964.41
pif4	nAT	23	702.22
pif4	nAT	23	669.07
pif4	nAT	23	704.14

[truncated: 3 more sheets: total root length_hAT, total root area_nAT, total root area_hAT]
