# Supplementary material for: Integrative phenotyping approaches to unmask the Phyb-PIF4 pathway in Arabidopsis thaliana reproductive organs at high ambient temperatures
Source: Research Square preprint supplement (doi:10.21203/rs.3.rs-4223427/v1), 2024-04-15
Supplement: Supplementary file 6 [file a6fbcdf55abbf00ba7ee199a.xlsx]

## Sheet: summary
Summary statistical analysis of root length comparison (Fig. 1 and Additional file 1 - Fig. S2)
Genotype	compared to	nAT_7DAG	nAT_10DAG	nAT_14DAG	nAT_16DAG	nAT_18DAG	nAT_21DAG	hAT_7DAG	hAT_10DAG	hAT_14DAG	hAT_16DAG	hAT_18DAG	hAT_21DAG
35S::PIF4	Col-0	significant			significant	significant	significant	significant			significant	significant
35S::PIF4	phyb	significant	significant
35S::PIF4	pif4						significant					significant	significant
Col-0	phyb	significant	significant	significant	significant	significant		significant	significant	significant	significant	significant
Col-0	pif4	significant	significant					significant
phyb	pif4	significant	significant	significant				significant		significant	significant	significant

## Sheet: nAT_7DAG
group1	group2	meandiff	p-adj	lower	upper	reject
35S::PIF4	Col-0	0.6154	0.0025	0.1796	1.0512	TRUE
35S::PIF4	phyb	-0.4385	0.0481	-0.8743	-0.0027	TRUE
35S::PIF4	pif4	0.0462	0.9921	-0.3897	0.482	FALSE
Col-0	phyb	-1.0538	0	-1.4897	-0.618	TRUE
Col-0	pif4	-0.5692	0.0058	-1.005	-0.1334	TRUE
phyb	pif4	0.4846	0.0239	0.0488	0.9204	TRUE
ANOVA (Analysis of Variance): This test was conducted to determine if there are any statistically significant differences between the means of several independent (unrelated) groups. It was performed separately for each time point within each condition (nAT and hAT).
Tukey's Honestly Significant Difference (HSD) Test: If ANOVA indicated significant differences, Tukey's HSD test was used to perform multiple pairwise comparisons between the means of different genotypes to determine which pairs differ significantly.
Interpreting 'Reject' Column:
True: Indicates a statistically significant difference in means between the two genotypes.
False: Indicates no statistically significant difference in means between the two genotypes.
Significance Level:
The significance level used for these tests is typically 0.05 (5%), meaning that differences are considered statistically significant if the p-value is less than 0.05.

## Sheet: nAT_10DAG
group1	group2	meandiff	p-adj	lower	upper	reject
35S::PIF4	Col-0	0.7838	0.1655	-0.2062	1.7739	FALSE
35S::PIF4	phyb	-2.3008	0	-3.2908	-1.3107	TRUE
35S::PIF4	pif4	-0.3392	0.7986	-1.3293	0.6508	FALSE
Col-0	phyb	-3.0846	0	-4.0747	-2.0946	TRUE
Col-0	pif4	-1.1231	0.0204	-2.1131	-0.133	TRUE
phyb	pif4	1.9615	0	0.9715	2.9516	TRUE

## Sheet: nAT_14DAG
group1	group2	meandiff	p-adj	lower	upper	reject
35s::PIF4	Col_0	0.8777	0.2275	-0.3297	2.0851	FALSE
35s::PIF4	phyb	-1.0362	0.1161	-2.2435	0.1712	FALSE
35s::PIF4	pif4	0.3485	0.8684	-0.8589	1.5558	FALSE
Col_0	phyb	-1.9138	0.0006	-3.1212	-0.7065	TRUE
Col_0	pif4	-0.5292	0.6506	-1.7366	0.6781	FALSE
phyb	pif4	1.3846	0.0187	0.1773	2.592	TRUE

## Sheet: nAT_16DAG
group1	group2	meandiff	p-adj	lower	upper	reject
35s::PIF4	Col_0	1.8431	0.017	0.2552	3.431	TRUE
35s::PIF4	phyb	-0.7862	0.5565	-2.3741	0.8018	FALSE
35s::PIF4	pif4	0.4885	0.8454	-1.0994	2.0764	FALSE
Col_0	phyb	-2.6292	0.0003	-4.2171	-1.0413	TRUE
Col_0	pif4	-1.3546	0.1194	-2.9425	0.2333	FALSE
phyb	pif4	1.2746	0.1564	-0.3133	2.8625	FALSE

## Sheet: nAT_18DAG
group1	group2	meandiff	p-adj	lower	upper	reject
35s::PIF4	Col_0	2.8562	0.0003	1.1282	4.5841	TRUE
35s::PIF4	phyb	-0.0538	0.9998	-1.7818	1.6741	FALSE
35s::PIF4	pif4	1.63	0.071	-0.098	3.358	FALSE
Col_0	phyb	-2.91	0.0003	-4.638	-1.182	TRUE
Col_0	pif4	-1.2262	0.2465	-2.9541	0.5018	FALSE
phyb	pif4	1.6838	0.0587	-0.0441	3.4118	FALSE

## Sheet: nAT_21DAG
group1	group2	meandiff	p-adj	lower	upper	reject
35S::PIF4	Col-0	1.6515	0.0254	0.1545	3.1486	TRUE
35S::PIF4	phyb	0.8162	0.4747	-0.6809	2.3132	FALSE
35S::PIF4	pif4	1.6023	0.0317	0.1052	3.0994	TRUE
Col-0	phyb	-0.8354	0.4543	-2.3325	0.6617	FALSE
Col-0	pif4	-0.0492	0.9998	-1.5463	1.4478	FALSE
phyb	pif4	0.7862	0.507	-0.7109	2.2832	FALSE

## Sheet: hAT_7DAG
group1	group2	meandiff	p-adj	lower	upper	reject
35S::PIF4	Col-0	0.5923	0.0106	0.1091	1.0755	TRUE
35S::PIF4	phyb	-0.3846	0.1619	-0.8678	0.0986	FALSE
35S::PIF4	pif4	0.1046	0.9387	-0.3786	0.5878	FALSE
Col-0	phyb	-0.9769	0	-1.4601	-0.4937	TRUE
Col-0	pif4	-0.4877	0.0471	-0.9709	-0.0045	TRUE
phyb	pif4	0.4892	0.0462	0.0061	0.9724	TRUE

## Sheet: hAT_10DAG
group1	group2	meandiff	p-adj	lower	upper	reject
35S::PIF4	Col-0	0.9385	0.0554	-0.0155	1.8924	FALSE
35S::PIF4	phyb	-0.5215	0.4722	-1.4755	0.4324	FALSE
35S::PIF4	pif4	0.3385	0.7812	-0.6155	1.2924	FALSE
Col-0	phyb	-1.46	0.001	-2.4139	-0.5061	TRUE
Col-0	pif4	-0.6	0.3484	-1.5539	0.3539	FALSE
phyb	pif4	0.86	0.0908	-0.0939	1.8139	FALSE

## Sheet: hAT_14DAG
group1	group2	meandiff	p-adj	lower	upper	reject
35s::PIF4	Col_0	1.2192	0.0956	-0.1465	2.5849	FALSE
35s::PIF4	phyb	-0.8931	0.3146	-2.2588	0.4726	FALSE
35s::PIF4	pif4	0.9185	0.2907	-0.4472	2.2842	FALSE
Col_0	phyb	-2.1123	0.0008	-3.478	-0.7466	TRUE
Col_0	pif4	-0.3008	0.9358	-1.6665	1.0649	FALSE
phyb	pif4	1.8115	0.005	0.4458	3.1772	TRUE

[truncated: 3 more sheets: hAT_16DAG, hAT_18DAG, hAT_21DAG]
