# Supplementary material for: Integrative phenotyping approaches to unmask the Phyb-PIF4 pathway in Arabidopsis thaliana reproductive organs at high ambient temperatures
Source: Research Square preprint supplement (doi:10.21203/rs.3.rs-4223427/v1), 2024-04-15
Supplement: Supplementary file 8 [file d07e12b3b2513473c6af2855.xlsx]

## Sheet: stem length_nAT
Plant ID	Condition	plant #	time point	length
Col-0	nAT	1	29	5.1
Col-0	nAT	2	29	3.9
Col-0	nAT	3	29	0
Col-0	nAT	4	29	0
Col-0	nAT	5	29	3.1
Col-0	nAT	6	29	6.3
Col-0	nAT	7	29	0
Col-0	nAT	8	29	2.6
Col-0	nAT	9	29	0
Col-0	nAT	10	29	0
35S::PIF4	nAT	1	29	0
35S::PIF4	nAT	2	29	0
35S::PIF4	nAT	3	29	0
35S::PIF4	nAT	4	29	5.4
35S::PIF4	nAT	5	29	0
35S::PIF4	nAT	6	29	8.6
35S::PIF4	nAT	7	29	0
35S::PIF4	nAT	8	29	0
35S::PIF4	nAT	9	29	0
35S::PIF4	nAT	10	29	4.2
phyb	nAT	1	29	16.4
phyb	nAT	2	29	17
phyb	nAT	3	29	13.2
phyb	nAT	4	29	10.7
phyb	nAT	5	29	15.2
phyb	nAT	6	29	14.9
phyb	nAT	7	29	11.16
phyb	nAT	8	29	12.7
phyb	nAT	9	29	10.5
phyb	nAT	10	29	13.9
pif3	nAT	1	29	1.9
pif3	nAT	2	29	0
pif3	nAT	3	29	8.8
pif3	nAT	4	29	3.7
pif3	nAT	5	29	2.4
pif3	nAT	6	29	0
pif3	nAT	7	29	1.2
pif3	nAT	8	29	8.1
pif3	nAT	9	29	3.1
pif3	nAT	10	29	5.8
pif4	nAT	1	29	5.1
pif4	nAT	2	29	0
pif4	nAT	3	29	0
pif4	nAT	4	29	2.6
pif4	nAT	5	29	0
pif4	nAT	6	29	0
pif4	nAT	7	29	2
pif4	nAT	8	29	0
pif4	nAT	9	29	0
pif4	nAT	10	29	0
pif7-1	nAT	1	29	0
pif7-1	nAT	2	29	0
pif7-1	nAT	3	29	0
pif7-1	nAT	4	29	0
pif7-1	nAT	5	29	2.3
pif7-1	nAT	6	29	0
pif7-1	nAT	7	29	0
pif7-1	nAT	8	29	0
pif7-1	nAT	9	29	0
pif7-1	nAT	10	29	0
pif7-2	nAT	1	29	0
pif7-2	nAT	2	29	0
pif7-2	nAT	3	29	0
pif7-2	nAT	4	29	0
pif7-2	nAT	5	29	0
pif7-2	nAT	6	29	0
pif7-2	nAT	7	29	0
pif7-2	nAT	8	29	0
pif7-2	nAT	9	29	0
pif7-2	nAT	10	29	0
pif3pif7	nAT	1	29	1.8
pif3pif7	nAT	2	29	0
pif3pif7	nAT	3	29	3.6
pif3pif7	nAT	4	29	0
pif3pif7	nAT	5	29	1.1
pif3pif7	nAT	6	29	2.8
pif3pif7	nAT	7	29	0
pif3pif7	nAT	8	29	0
pif3pif7	nAT	9	29	0
pif3pif7	nAT	10	29	0
pifq	nAT	1	29	0
pifq	nAT	2	29	0
pifq	nAT	3	29	0
pifq	nAT	4	29	0
pifq	nAT	5	29	1.4
pifq	nAT	6	29	0.6
pifq	nAT	7	29	1.5
pifq	nAT	8	29	0
pifq	nAT	9	29	0
pifq	nAT	10	29	0
Col-0	nAT	1	36	25
Col-0	nAT	2	36	25.7
Col-0	nAT	3	36	10.3
Col-0	nAT	4	36	18.3
Col-0	nAT	5	36	25.8
Col-0	nAT	6	36	23.8
Col-0	nAT	7	36	24.5
Col-0	nAT	8	36	22
Col-0	nAT	9	36	17.5
Col-0	nAT	10	36	23.1
35S::PIF4	nAT	1	36	12.7
35S::PIF4	nAT	2	36	15.4
35S::PIF4	nAT	3	36	15
35S::PIF4	nAT	4	36	21.5
35S::PIF4	nAT	5	36	16.5
35S::PIF4	nAT	6	36	25
35S::PIF4	nAT	7	36	9
35S::PIF4	nAT	8	36	14
35S::PIF4	nAT	9	36	12.2
35S::PIF4	nAT	10	36	19.8
phyb	nAT	1	36	29.8
phyb	nAT	2	36	26.2
phyb	nAT	3	36	28
phyb	nAT	4	36	28
phyb	nAT	5	36	31.8
phyb	nAT	6	36	28.2
phyb	nAT	7	36	29
phyb	nAT	8	36	19.3
phyb	nAT	9	36	26
phyb	nAT	10	36	29
pif3	nAT	1	36	18.7
pif3	nAT	2	36	19.9
pif3	nAT	3	36	25.4
pif3	nAT	4	36	24.1
pif3	nAT	5	36	22.6
pif3	nAT	6	36	13.7
pif3	nAT	7	36	19.1
pif3	nAT	8	36	23.5
pif3	nAT	9	36	22.7
pif3	nAT	10	36	26.2
pif4	nAT	1	36	24.9
pif4	nAT	2	36	20
pif4	nAT	3	36	0
pif4	nAT	4	36	21.8
pif4	nAT	5	36	21.8
pif4	nAT	6	36	17.4
pif4	nAT	7	36	20.1
pif4	nAT	8	36	12.5
pif4	nAT	9	36	19.5
pif4	nAT	10	36	17.7
pif7-1	nAT	1	36	22.5
pif7-1	nAT	2	36	3
pif7-1	nAT	3	36	11.6
pif7-1	nAT	4	36	15.6
pif7-1	nAT	5	36	22.4
pif7-1	nAT	6	36	9.2
pif7-1	nAT	7	36	2.8
pif7-1	nAT	8	36	7.5
pif7-1	nAT	9	36	18.8
pif7-1	nAT	10	36	12.2
pif7-2	nAT	1	36	13.7
pif7-2	nAT	2	36	11.7
pif7-2	nAT	3	36	10.4
pif7-2	nAT	4	36	10.1
pif7-2	nAT	5	36	16.4
pif7-2	nAT	6	36	8.8
pif7-2	nAT	7	36	15.9
pif7-2	nAT	8	36	18.5
pif7-2	nAT	9	36	5.8
pif7-2	nAT	10	36	5.6
pif3pif7	nAT	1	36	22.4
pif3pif7	nAT	2	36	18.1
pif3pif7	nAT	3	36	25.8
pif3pif7	nAT	4	36	9.9
pif3pif7	nAT	5	36	18
pif3pif7	nAT	6	36	22.2
pif3pif7	nAT	7	36	16.8
pif3pif7	nAT	8	36	10.2
pif3pif7	nAT	9	36	19.3
pif3pif7	nAT	10	36	14.9
pifq	nAT	1	36	4.8
pifq	nAT	2	36	12.2
pifq	nAT	3	36	14.5
pifq	nAT	4	36	11.3
pifq	nAT	5	36	17.4
pifq	nAT	6	36	13.8
pifq	nAT	7	36	17.4
pifq	nAT	8	36	18.6
pifq	nAT	9	36	15.9
pifq	nAT	10	36	10.8
Col-0	nAT	1	39	30.2
Col-0	nAT	2	39	30.4
Col-0	nAT	3	39	21
Col-0	nAT	4	39	26.8
Col-0	nAT	5	39	31
Col-0	nAT	6	39	25.8
Col-0	nAT	7	39	29.1
Col-0	nAT	8	39	26.2
Col-0	nAT	9	39	21.7
Col-0	nAT	10	39	28.6
35S::PIF4	nAT	1	39	18.4
35S::PIF4	nAT	2	39	19.8
35S::PIF4	nAT	3	39	22.2
35S::PIF4	nAT	4	39	23.3
35S::PIF4	nAT	5	39	20.4
35S::PIF4	nAT	6	39	27.3
35S::PIF4	nAT	7	39	13.8
35S::PIF4	nAT	8	39	20.8
35S::PIF4	nAT	9	39	18.3
35S::PIF4	nAT	10	39	25.1
phyb	nAT	1	39	33.5
phyb	nAT	2	39	29.2
phyb	nAT	3	39	30.1
phyb	nAT	4	39	32.9
phyb	nAT	5	39	32.1
phyb	nAT	6	39	32
phyb	nAT	7	39	33.8
phyb	nAT	8	39	27.4
phyb	nAT	9	39	26.5
phyb	nAT	10	39	32.7
pif3	nAT	1	39	22.7
pif3	nAT	2	39	25.9
pif3	nAT	3	39	29
pif3	nAT	4	39	27.8
pif3	nAT	5	39	26.4
pif3	nAT	6	39	23.3
pif3	nAT	7	39	21.9
pif3	nAT	8	39	27.5
pif3	nAT	9	39	21.6
pif3	nAT	10	39	32.5
pif4	nAT	1	39	29.6
pif4	nAT	2	39	27
pif4	nAT	3	39	0
pif4	nAT	4	39	24.7
pif4	nAT	5	39	27.7
pif4	nAT	6	39	22.8
pif4	nAT	7	39	22.8
pif4	nAT	8	39	22
pif4	nAT	9	39	24.2
pif4	nAT	10	39	25.9
pif7-1	nAT	1	39	28
pif7-1	nAT	2	39	11.4
pif7-1	nAT	3	39	20.5
pif7-1	nAT	4	39	19.8
pif7-1	nAT	5	39	28.1
pif7-1	nAT	6	39	20.5
pif7-1	nAT	7	39	12.9
pif7-1	nAT	8	39	17.9
pif7-1	nAT	9	39	25.6
pif7-1	nAT	10	39	21.4
pif7-2	nAT	1	39	21.9
pif7-2	nAT	2	39	23.3
pif7-2	nAT	3	39	22.2
pif7-2	nAT	4	39	22.7
pif7-2	nAT	5	39	27.8
pif7-2	nAT	6	39	18.8
pif7-2	nAT	7	39	23.4
pif7-2	nAT	8	39	24.1
pif7-2	nAT	9	39	18.4
pif7-2	nAT	10	39	17.1
pif3pif7	nAT	1	39	22
pif3pif7	nAT	2	39	25
pif3pif7	nAT	3	39	31.4
pif3pif7	nAT	4	39	20.9
pif3pif7	nAT	5	39	23
pif3pif7	nAT	6	39	23
pif3pif7	nAT	7	39	20.1
pif3pif7	nAT	8	39	20.1
pif3pif7	nAT	9	39	26.3
pif3pif7	nAT	10	39	25.4
pifq	nAT	1	39	14.6
pifq	nAT	2	39	19.9
pifq	nAT	3	39	19.8
pifq	nAT	4	39	19.5
pifq	nAT	5	39	23.4
pifq	nAT	6	39	21.3
pifq	nAT	7	39	21
pifq	nAT	8	39	19.3
pifq	nAT	9	39	21.1
pifq	nAT	10	39	19.5
Col-0	nAT	1	49	30
Col-0	nAT	2	49	35.3
Col-0	nAT	3	49	37.3
Col-0	nAT	4	49	43.8
Col-0	nAT	5	49	35.7
Col-0	nAT	6	49	38.3
Col-0	nAT	7	49	42.1
Col-0	nAT	8	49	31.8
Col-0	nAT	9	49	37.3
Col-0	nAT	10	49	35
35S::PIF4	nAT	1	49	32.4
35S::PIF4	nAT	2	49	29.9
35S::PIF4	nAT	3	49	37.7
35S::PIF4	nAT	4	49	28.6
35S::PIF4	nAT	5	49	31.9
35S::PIF4	nAT	6	49	33
35S::PIF4	nAT	7	49	32
35S::PIF4	nAT	8	49	37.6
35S::PIF4	nAT	9	49	25.6
35S::PIF4	nAT	10	49	23.8
phyb	nAT	1	49	30.8
phyb	nAT	2	49	32.3
phyb	nAT	3	49	34.4
phyb	nAT	4	49	40
phyb	nAT	5	49	35
phyb	nAT	6	49	38
phyb	nAT	7	49	30
phyb	nAT	8	49	28
phyb	nAT	9	49	32.3
phyb	nAT	10	49	36.2
pif3	nAT	1	49	29.3
pif3	nAT	2	49	26.5
pif3	nAT	3	49	34.4
pif3	nAT	4	49	40
pif3	nAT	5	49	33
pif3	nAT	6	49	35.4
pif3	nAT	7	49	33.6
pif3	nAT	8	49	29.5
pif3	nAT	9	49	32.6
pif3	nAT	10	49	38.2
pif4	nAT	1	49	34.6
pif4	nAT	2	49	34.8
pif4	nAT	3	49	18
pif4	nAT	4	49	30.9
pif4	nAT	5	49	28
pif4	nAT	6	49	34.7
pif4	nAT	7	49	32.9
pif4	nAT	8	49	37.8
pif4	nAT	9	49	36.1
pif4	nAT	10	49	38.2
pif7-1	nAT	1	49	38
pif7-1	nAT	2	49	37
pif7-1	nAT	3	49	32.8
pif7-1	nAT	4	49	36
pif7-1	nAT	5	49	35
pif7-1	nAT	6	49	38
pif7-1	nAT	7	49	36.6
pif7-1	nAT	8	49	37
pif7-1	nAT	9	49	32.5
pif7-1	nAT	10	49	36.6
pif7-2	nAT	1	49	39.8
pif7-2	nAT	2	49	36.2
pif7-2	nAT	3	49	40
pif7-2	nAT	4	49	42
pif7-2	nAT	5	49	37.8
pif7-2	nAT	6	49	36.6
pif7-2	nAT	7	49	40
pif7-2	nAT	8	49	34.3
pif7-2	nAT	9	49	39.7
pif7-2	nAT	10	49	37
pif3pif7	nAT	1	49	34.6
pif3pif7	nAT	2	49	40
pif3pif7	nAT	3	49	41
pif3pif7	nAT	4	49	33.5
pif3pif7	nAT	5	49	35.9
pif3pif7	nAT	6	49	34.1
pif3pif7	nAT	7	49	33
pif3pif7	nAT	8	49	34
pif3pif7	nAT	9	49	29.3
pif3pif7	nAT	10	49	43.1
pifq	nAT	1	49	37
pifq	nAT	2	49	35.9
pifq	nAT	3	49	35
pifq	nAT	4	49	33
pifq	nAT	5	49	33.8
pifq	nAT	6	49	32
pifq	nAT	7	49	34.9
pifq	nAT	8	49	31.5
pifq	nAT	9	49	33.5
pifq	nAT	10	49	36.1

## Sheet: Stem_Length_ RGR_nAT
Line	Condition	Stem_RGR (29_39)		Line_Condition	Condition	Stem_RGR_(29-49)
Col-0	nAT	2.51		Col-0	nAT	1.245
Col-0	nAT	2.65		Col-0	nAT	1.57
Col-0	nAT	2.1		Col-0	nAT	1.865
Col-0	nAT	2.68		Col-0	nAT	2.19
Col-0	nAT	2.79		Col-0	nAT	1.63
Col-0	nAT	1.95		Col-0	nAT	1.6
Col-0	nAT	2.91		Col-0	nAT	2.105
Col-0	nAT	2.36		Col-0	nAT	1.46
Col-0	nAT	2.17		Col-0	nAT	1.865
Col-0	nAT	2.86		Col-0	nAT	1.75
35S::PIF4	nAT	1.84		35S::PIF4	nAT	1.62
35S::PIF4	nAT	1.98		35S::PIF4	nAT	1.495
35S::PIF4	nAT	2.22		35S::PIF4	nAT	1.885
35S::PIF4	nAT	1.79		35S::PIF4	nAT	1.16
35S::PIF4	nAT	2.04		35S::PIF4	nAT	1.595
35S::PIF4	nAT	1.87		35S::PIF4	nAT	1.22
35S::PIF4	nAT	1.38		35S::PIF4	nAT	1.6
35S::PIF4	nAT	2.08		35S::PIF4	nAT	1.88
35S::PIF4	nAT	1.83		35S::PIF4	nAT	1.28
35S::PIF4	nAT	2.09		35S::PIF4	nAT	0.98
phyb	nAT	1.71		phyb	nAT	0.72
phyb	nAT	1.22		phyb	nAT	0.765
phyb	nAT	1.69		phyb	nAT	1.06
phyb	nAT	2.22		phyb	nAT	1.465
phyb	nAT	1.69		phyb	nAT	0.99
phyb	nAT	1.71		phyb	nAT	1.155
phyb	nAT	2.264		phyb	nAT	0.942
phyb	nAT	1.47		phyb	nAT	0.765
phyb	nAT	1.6		phyb	nAT	1.09
phyb	nAT	1.88		phyb	nAT	1.115
pif3	nAT	2.08		pif3	nAT	1.37
pif3	nAT	2.59		pif3	nAT	1.325
pif3	nAT	2.02		pif3	nAT	1.28
pif3	nAT	2.41		pif3	nAT	1.815
pif3	nAT	2.4		pif3	nAT	1.53
pif3	nAT	2.33		pif3	nAT	1.77
pif3	nAT	2.07		pif3	nAT	1.62
pif3	nAT	1.94		pif3	nAT	1.07
pif3	nAT	1.85		pif3	nAT	1.475
pif3	nAT	2.67		pif3	nAT	1.62
pif4	nAT	2.45		pif4	nAT	1.475
pif4	nAT	2.7		pif4	nAT	1.74
pif4	nAT	0		pif4	nAT	0.9
pif4	nAT	2.21		pif4	nAT	1.415
pif4	nAT	2.77		pif4	nAT	1.4
pif4	nAT	2.28		pif4	nAT	1.735
pif4	nAT	2.08		pif4	nAT	1.545
pif4	nAT	2.2		pif4	nAT	1.89
pif4	nAT	2.42		pif4	nAT	1.805
pif4	nAT	2.59		pif4	nAT	1.91
pif7-1	nAT	2.8		pif7-1	nAT	1.9
pif7-1	nAT	1.14		pif7-1	nAT	1.85
pif7-1	nAT	2.05		pif7-1	nAT	1.64
pif7-1	nAT	1.98		pif7-1	nAT	1.8
pif7-1	nAT	2.58		pif7-1	nAT	1.635
pif7-1	nAT	2.05		pif7-1	nAT	1.9
pif7-1	nAT	1.29		pif7-1	nAT	1.83
pif7-1	nAT	1.79		pif7-1	nAT	1.85
pif7-1	nAT	2.56		pif7-1	nAT	1.625
pif7-1	nAT	2.14		pif7-1	nAT	1.83
pif7-2	nAT	2.19		pif7-2	nAT	1.99
pif7-2	nAT	2.33		pif7-2	nAT	1.81
pif7-2	nAT	2.22		pif7-2	nAT	2
pif7-2	nAT	2.27		pif7-2	nAT	2.1
pif7-2	nAT	2.78		pif7-2	nAT	1.89
pif7-2	nAT	1.88		pif7-2	nAT	1.83
pif7-2	nAT	2.34		pif7-2	nAT	2
pif7-2	nAT	2.41		pif7-2	nAT	1.715
pif7-2	nAT	1.84		pif7-2	nAT	1.985
pif7-2	nAT	1.71		pif7-2	nAT	1.85
pif3 pif7	nAT	2.02		pif3 pif7	nAT	1.64
pif3 pif7	nAT	2.5		pif3 pif7	nAT	2
pif3 pif7	nAT	2.78		pif3 pif7	nAT	1.87
pif3 pif7	nAT	2.09		pif3 pif7	nAT	1.675
pif3 pif7	nAT	2.19		pif3 pif7	nAT	1.74
pif3 pif7	nAT	2.02		pif3 pif7	nAT	1.565
pif3 pif7	nAT	2.01		pif3 pif7	nAT	1.65
pif3 pif7	nAT	2.01		pif3 pif7	nAT	1.7
pif3 pif7	nAT	2.63		pif3 pif7	nAT	1.465
pif3 pif7	nAT	2.54		pif3 pif7	nAT	2.155
pifq	nAT	1.46		pifq	nAT	1.85
pifq	nAT	1.99		pifq	nAT	1.795
pifq	nAT	1.98		pifq	nAT	1.75
pifq	nAT	1.95		pifq	nAT	1.65
pifq	nAT	2.2		pifq	nAT	1.62
pifq	nAT	2.07		pifq	nAT	1.57
pifq	nAT	1.95		pifq	nAT	1.67
pifq	nAT	1.93		pifq	nAT	1.575
pifq	nAT	2.11		pifq	nAT	1.675
pifq	nAT	1.95		pifq	nAT	1.805

## Sheet: stem length_hAT
Plant ID	Condition	plant #	time point	length
Col-0	hAT	1	27	18.4
Col-0	hAT	2	27	15.4
Col-0	hAT	3	27	13.2
Col-0	hAT	4	27	14.9
Col-0	hAT	5	27	10.6
Col-0	hAT	6	27	13.2
Col-0	hAT	7	27	12.2
Col-0	hAT	8	27	12
Col-0	hAT	9	27	12.9
Col-0	hAT	10	27	17.4
35S::PIF4	hAT	1	27	13.3
35S::PIF4	hAT	2	27	11.3
35S::PIF4	hAT	3	27	8.8
35S::PIF4	hAT	4	27	8
35S::PIF4	hAT	5	27	10.11
35S::PIF4	hAT	6	27	0
35S::PIF4	hAT	7	27	5.3
35S::PIF4	hAT	8	27	0
35S::PIF4	hAT	9	27	0
35S::PIF4	hAT	10	27	0
phyb	hAT	1	27	16.9
phyb	hAT	2	27	16.6
phyb	hAT	3	27	9.8
phyb	hAT	4	27	16.8
phyb	hAT	5	27	20.1
phyb	hAT	6	27	8.7
phyb	hAT	7	27	16.5
phyb	hAT	8	27	8
phyb	hAT	9	27	8
phyb	hAT	10	27	19.1
pif3	hAT	1	27	3
pif3	hAT	2	27	16.6
pif3	hAT	3	27	16
pif3	hAT	4	27	17.3
pif3	hAT	5	27	8.2
pif3	hAT	6	27	15.5
pif3	hAT	7	27	13.3
pif3	hAT	8	27	9.7
pif3	hAT	9	27	10.9
pif3	hAT	10	27	12.3
pif4	hAT	1	27	14.4
pif4	hAT	2	27	16.2
pif4	hAT	3	27	10.2
pif4	hAT	4	27	9.2
pif4	hAT	5	27	13.7
pif4	hAT	6	27	12.3
pif4	hAT	7	27	16.7
pif4	hAT	8	27	13.3
pif4	hAT	9	27	10.8
pif4	hAT	10	27	6.7
pif7-1	hAT	1	27	18.5
pif7-1	hAT	2	27	15.5
pif7-1	hAT	3	27	16.7
pif7-1	hAT	4	27	20.5
pif7-1	hAT	5	27	15
pif7-1	hAT	6	27	8
pif7-1	hAT	7	27	8.4
pif7-1	hAT	8	27	12.7
pif7-1	hAT	9	27	15.5
pif7-1	hAT	10	27	10.3
pif7-2	hAT	1	27	14.7
pif7-2	hAT	2	27	16.3
pif7-2	hAT	3	27	1.2
pif7-2	hAT	4	27	14.5
pif7-2	hAT	5	27	17.3
pif7-2	hAT	6	27	13.4
pif7-2	hAT	7	27	17.2
pif7-2	hAT	8	27	0
pif7-2	hAT	9	27	6.4
pif7-2	hAT	10	27	6.4
pif3pif7	hAT	1	27	6.4
pif3pif7	hAT	2	27	10.1
pif3pif7	hAT	3	27	16.2
pif3pif7	hAT	4	27	15.9
pif3pif7	hAT	5	27	2.2
pif3pif7	hAT	6	27	17.2
pif3pif7	hAT	7	27	15.5
pif3pif7	hAT	8	27	16.2
pif3pif7	hAT	9	27	14.3
pif3pif7	hAT	10	27	13.9
pifq	hAT	1	27	0
pifq	hAT	2	27	9.9
pifq	hAT	3	27	13
pifq	hAT	4	27	6.1
pifq	hAT	5	27	3
pifq	hAT	6	27	11.5
pifq	hAT	7	27	4.3
pifq	hAT	8	27	10.2
pifq	hAT	9	27	0
pifq	hAT	10	27	0.8
Col-0	hAT	1	30	23.7
Col-0	hAT	2	30	17.8
Col-0	hAT	3	30	21.2
Col-0	hAT	4	30	19.4
Col-0	hAT	5	30	19.1
Col-0	hAT	6	30	21.5
Col-0	hAT	7	30	19
Col-0	hAT	8	30	20
Col-0	hAT	9	30	19.9
Col-0	hAT	10	30	21.9
35S::PIF4	hAT	1	30	15.1
35S::PIF4	hAT	2	30	16.8
35S::PIF4	hAT	3	30	14.3
35S::PIF4	hAT	4	30	11.4
35S::PIF4	hAT	5	30	16.5
35S::PIF4	hAT	6	30	1.3
35S::PIF4	hAT	7	30	11.16
35S::PIF4	hAT	8	30	6.7
35S::PIF4	hAT	9	30	12.9
35S::PIF4	hAT	10	30	11
phyb	hAT	1	30	21.9
phyb	hAT	2	30	23.3
phyb	hAT	3	30	16.9
phyb	hAT	4	30	22.6
phyb	hAT	5	30	26.15
phyb	hAT	6	30	15
phyb	hAT	7	30	23.3
phyb	hAT	8	30	15.7
phyb	hAT	9	30	14.8
phyb	hAT	10	30	23.8
pif3	hAT	1	30	9.6
pif3	hAT	2	30	20.5
pif3	hAT	3	30	23.6
pif3	hAT	4	30	22.1
pif3	hAT	5	30	15.9
pif3	hAT	6	30	22.6
pif3	hAT	7	30	19.3
pif3	hAT	8	30	14.6
pif3	hAT	9	30	14
pif3	hAT	10	30	18
pif4	hAT	1	30	18.7
pif4	hAT	2	30	23.3
pif4	hAT	3	30	14.3
pif4	hAT	4	30	16.9
pif4	hAT	5	30	19.1
pif4	hAT	6	30	17.8
pif4	hAT	7	30	22.7
pif4	hAT	8	30	20.9
pif4	hAT	9	30	17.2
pif4	hAT	10	30	16.3
pif7-1	hAT	1	30	26.9
pif7-1	hAT	2	30	23.6
pif7-1	hAT	3	30	21.8
pif7-1	hAT	4	30	28.1
pif7-1	hAT	5	30	20.9
pif7-1	hAT	6	30	16.1
pif7-1	hAT	7	30	19.4
pif7-1	hAT	8	30	21.7
pif7-1	hAT	9	30	23
pif7-1	hAT	10	30	17.7
pif7-2	hAT	1	30	23.1
pif7-2	hAT	2	30	25.5
pif7-2	hAT	3	30	9.3
pif7-2	hAT	4	30	17.4
pif7-2	hAT	5	30	24
pif7-2	hAT	6	30	20.4
pif7-2	hAT	7	30	19.4
pif7-2	hAT	8	30	4.7
pif7-2	hAT	9	30	17.3
pif7-2	hAT	10	30	17.7
pif3pif7	hAT	1	30	17.6
pif3pif7	hAT	2	30	21.6
pif3pif7	hAT	3	30	22.1
pif3pif7	hAT	4	30	12.4
pif3pif7	hAT	5	30	24.5
pif3pif7	hAT	6	30	19.1
pif3pif7	hAT	7	30	23.9
pif3pif7	hAT	8	30	21.3
pif3pif7	hAT	9	30	19.3
pif3pif7	hAT	10	30	20.2
pifq	hAT	1	30	0
pifq	hAT	2	30	17.1
pifq	hAT	3	30	19.8
pifq	hAT	4	30	13.3
pifq	hAT	5	30	12
pifq	hAT	6	30	16.7
pifq	hAT	7	30	13.6
pifq	hAT	8	30	12.3
pifq	hAT	9	30	16.7
pifq	hAT	10	30	7.9
Col-0	hAT	1	37	31.5
Col-0	hAT	2	37	23.2
Col-0	hAT	3	37	29.9
Col-0	hAT	4	37	27
Col-0	hAT	5	37	30
Col-0	hAT	6	37	30
Col-0	hAT	7	37	28
Col-0	hAT	8	37	37
Col-0	hAT	9	37	29
Col-0	hAT	10	37	22.8
35S::PIF4	hAT	1	37	20.5
35S::PIF4	hAT	2	37	22
35S::PIF4	hAT	3	37	17.7
35S::PIF4	hAT	4	37	19.4
35S::PIF4	hAT	5	37	20.7
35S::PIF4	hAT	6	37	13
35S::PIF4	hAT	7	37	17.2
35S::PIF4	hAT	8	37	23.9
35S::PIF4	hAT	9	37	20.2
35S::PIF4	hAT	10	37	15.6
phyb	hAT	1	37	26
phyb	hAT	2	37	26.2
phyb	hAT	3	37	27
phyb	hAT	4	37	24.9
phyb	hAT	5	37	38
phyb	hAT	6	37	29
phyb	hAT	7	37	25.3
phyb	hAT	8	37	27.2
phyb	hAT	9	37	21
phyb	hAT	10	37	29.8
pif3	hAT	1	37	30
pif3	hAT	2	37	32.2
pif3	hAT	3	37	30.9
pif3	hAT	4	37	33.4
pif3	hAT	5	37	32.4
pif3	hAT	6	37	31.6
pif3	hAT	7	37	32.2
pif3	hAT	8	37	18.1
pif3	hAT	9	37	15.6
pif3	hAT	10	37	30.4
pif4	hAT	1	37	26.6
pif4	hAT	2	37	26.8
pif4	hAT	3	37	27.5
pif4	hAT	4	37	28.6
pif4	hAT	5	37	35.2
pif4	hAT	6	37	23.7
pif4	hAT	7	37	28
pif4	hAT	8	37	33
pif4	hAT	9	37	28.4
pif4	hAT	10	37	30
pif7-1	hAT	1	37	30
pif7-1	hAT	2	37	28
pif7-1	hAT	3	37	30.2
pif7-1	hAT	4	37	36.7
pif7-1	hAT	5	37	28.1
pif7-1	hAT	6	37	33
pif7-1	hAT	7	37	23
pif7-1	hAT	8	37	32
pif7-1	hAT	9	37	26
pif7-1	hAT	10	37	31
pif7-2	hAT	1	37	31.9
pif7-2	hAT	2	37	33.5
pif7-2	hAT	3	37	27.7
pif7-2	hAT	4	37	30
pif7-2	hAT	5	37	29.4
pif7-2	hAT	6	37	27.4
pif7-2	hAT	7	37	30
pif7-2	hAT	8	37	18.8
pif7-2	hAT	9	37	35
pif7-2	hAT	10	37	30
pif3pif7	hAT	1	37	29.6
pif3pif7	hAT	2	37	24.8
pif3pif7	hAT	3	37	28.3
pif3pif7	hAT	4	37	17.7
pif3pif7	hAT	5	37	26.5
pif3pif7	hAT	6	37	27.1
pif3pif7	hAT	7	37	27.2
pif3pif7	hAT	8	37	34.3
pif3pif7	hAT	9	37	26.9
pif3pif7	hAT	10	37	29
pifq	hAT	1	37	11.3
pifq	hAT	2	37	31.9
pifq	hAT	3	37	32
pifq	hAT	4	37	27.9
pifq	hAT	5	37	26.4
pifq	hAT	6	37	29.3
pifq	hAT	7	37	22.1
pifq	hAT	8	37	27.7
pifq	hAT	9	37	23.6
pifq	hAT	10	37	20.2
Col-0	hAT	1	41	31.5
Col-0	hAT	2	41	28.1
Col-0	hAT	3	41	31
Col-0	hAT	4	41	28
Col-0	hAT	5	41	30
Col-0	hAT	6	41	30
Col-0	hAT	7	41	29.5
Col-0	hAT	8	41	37
Col-0	hAT	9	41	29
Col-0	hAT	10	41	23
35S::PIF4	hAT	1	41	21
35S::PIF4	hAT	2	41	22.6
35S::PIF4	hAT	3	41	18
35S::PIF4	hAT	4	41	20.6
35S::PIF4	hAT	5	41	22.6
35S::PIF4	hAT	6	41	13
35S::PIF4	hAT	7	41	18.2
35S::PIF4	hAT	8	41	24
35S::PIF4	hAT	9	41	20.3
35S::PIF4	hAT	10	41	15.6
phyb	hAT	1	41	30.9
phyb	hAT	2	41	32.1
phyb	hAT	3	41	27
phyb	hAT	4	41	29.8
phyb	hAT	5	41	43
phyb	hAT	6	41	30
phyb	hAT	7	41	28.3
phyb	hAT	8	41	28
phyb	hAT	9	41	23
phyb	hAT	10	41	31
pif3	hAT	1	41	16
pif3	hAT	2	41	34
pif3	hAT	3	41	32
pif3	hAT	4	41	26.2
pif3	hAT	5	41	33
pif3	hAT	6	41	30
pif3	hAT	7	41	33
pif3	hAT	8	41	23.4
pif3	hAT	9	41	22.8
pif3	hAT	10	41	33
pif4	hAT	1	41	38.9
pif4	hAT	2	41	33.8
pif4	hAT	3	41	31.5
pif4	hAT	4	41	36
pif4	hAT	5	41	35.5
pif4	hAT	6	41	24
pif4	hAT	7	41	31
pif4	hAT	8	41	36
pif4	hAT	9	41	30
pif4	hAT	10	41	37
pif7-1	hAT	1	41	30.6
pif7-1	hAT	2	41	26.7
pif7-1	hAT	3	41	31
pif7-1	hAT	4	41	37
pif7-1	hAT	5	41	29.5
pif7-1	hAT	6	41	34.6
pif7-1	hAT	7	41	37.5
pif7-1	hAT	8	41	32
pif7-1	hAT	9	41	28
pif7-1	hAT	10	41	32
pif7-2	hAT	1	41	32.6
pif7-2	hAT	2	41	34
pif7-2	hAT	3	41	28
pif7-2	hAT	4	41	30
pif7-2	hAT	5	41	36
pif7-2	hAT	6	41	36
pif7-2	hAT	7	41	36
pif7-2	hAT	8	41	29
pif7-2	hAT	9	41	42
pif7-2	hAT	10	41	34
pif3pif7	hAT	1	41	33
pif3pif7	hAT	2	41	31
pif3pif7	hAT	3	41	33
pif3pif7	hAT	4	41	26
pif3pif7	hAT	5	41	29
pif3pif7	hAT	6	41	33
pif3pif7	hAT	7	41	32.8
pif3pif7	hAT	8	41	35
pif3pif7	hAT	9	41	31
pif3pif7	hAT	10	41	33.3
pifq	hAT	1	41	19.9
pifq	hAT	2	41	32.3
pifq	hAT	3	41	33.8
pifq	hAT	4	41	34
pifq	hAT	5	41	28.7
pifq	hAT	6	41	30
pifq	hAT	7	41	28
pifq	hAT	8	41	34
pifq	hAT	9	41	30.8
pifq	hAT	10	41	22.7

## Sheet: Stem_length_RGR_hAT
Line	Condition	Stem_Length_RGR (27-37)		Line	Condition	Stem_Length_RGR (27-41)
Col-0	hAT	1.31		Col-0	hAT	0.935714
Col-0	hAT	0.78		Col-0	hAT	0.907143
Col-0	hAT	1.67		Col-0	hAT	1.27143
Col-0	hAT	1.21		Col-0	hAT	0.935714
Col-0	hAT	1.94		Col-0	hAT	1.38571
Col-0	hAT	1.68		Col-0	hAT	1.2
Col-0	hAT	1.58		Col-0	hAT	1.23571
Col-0	hAT	2.5		Col-0	hAT	1.78571
Col-0	hAT	1.61		Col-0	hAT	1.15
Col-0	hAT	0.54		Col-0	hAT	0.4
35S::PIF4	hAT	0.72		35S::PIF4	hAT	0.55
35S::PIF4	hAT	1.07		35S::PIF4	hAT	0.807143
35S::PIF4	hAT	0.89		35S::PIF4	hAT	0.657143
35S::PIF4	hAT	1.14		35S::PIF4	hAT	0.9
35S::PIF4	hAT	1.059		35S::PIF4	hAT	0.892143
35S::PIF4	hAT	1.3		35S::PIF4	hAT	0.928571
35S::PIF4	hAT	1.19		35S::PIF4	hAT	0.921429
35S::PIF4	hAT	2.39		35S::PIF4	hAT	1.71429
35S::PIF4	hAT	2.02		35S::PIF4	hAT	1.45
35S::PIF4	hAT	1.56		35S::PIF4	hAT	1.11429
phyb	hAT	0.91		phyb	hAT	1
phyb	hAT	0.96		phyb	hAT	1.10714
phyb	hAT	1.72		phyb	hAT	1.22857
phyb	hAT	0.81		phyb	hAT	0.928571
phyb	hAT	1.79		phyb	hAT	1.63571
phyb	hAT	2.03		phyb	hAT	1.52143
phyb	hAT	0.88		phyb	hAT	0.842857
phyb	hAT	1.92		phyb	hAT	1.42857
phyb	hAT	1.3		phyb	hAT	1.07143
phyb	hAT	1.07		phyb	hAT	0.85
pif3	hAT	2.7		pif3	hAT	0.928571
pif3	hAT	1.56		pif3	hAT	1.24286
pif3	hAT	1.49		pif3	hAT	1.14286
pif3	hAT	1.61		pif3	hAT	0.635714
pif3	hAT	2.42		pif3	hAT	1.77143
pif3	hAT	1.61		pif3	hAT	1.03571
pif3	hAT	1.89		pif3	hAT	1.40714
pif3	hAT	0.84		pif3	hAT	0.978571
pif3	hAT	0.47		pif3	hAT	0.85
pif3	hAT	1.81		pif3	hAT	1.47857
pif4	hAT	1.22		pif4	hAT	1.75
pif4	hAT	1.06		pif4	hAT	1.25714
pif4	hAT	1.73		pif4	hAT	1.52143
pif4	hAT	1.94		pif4	hAT	1.91429
pif4	hAT	2.15		pif4	hAT	1.55714
pif4	hAT	1.14		pif4	hAT	0.835714
pif4	hAT	1.13		pif4	hAT	1.02143
pif4	hAT	1.97		pif4	hAT	1.62143
pif4	hAT	1.76		pif4	hAT	1.37143
pif4	hAT	2.33		pif4	hAT	2.16429
pif7-1	hAT	1.15		pif7-1	hAT	0.864286
pif7-1	hAT	1.25		pif7-1	hAT	0.8
pif7-1	hAT	1.35		pif7-1	hAT	1.02143
pif7-1	hAT	1.62		pif7-1	hAT	1.17857
pif7-1	hAT	1.31		pif7-1	hAT	1.03571
pif7-1	hAT	2.5		pif7-1	hAT	1.9
pif7-1	hAT	1.46		pif7-1	hAT	2.07857
pif7-1	hAT	1.93		pif7-1	hAT	1.37857
pif7-1	hAT	1.05		pif7-1	hAT	0.892857
pif7-1	hAT	2.07		pif7-1	hAT	1.55
pif7-2	hAT	1.72		pif7-2	hAT	1.27857
pif7-2	hAT	1.72		pif7-2	hAT	1.26429
pif7-2	hAT	2.65		pif7-2	hAT	1.91429
pif7-2	hAT	1.55		pif7-2	hAT	1.10714
pif7-2	hAT	1.21		pif7-2	hAT	1.33571
pif7-2	hAT	1.4		pif7-2	hAT	1.61429
pif7-2	hAT	1.28		pif7-2	hAT	1.34286
pif7-2	hAT	1.88		pif7-2	hAT	2.07143
pif7-2	hAT	2.86		pif7-2	hAT	2.54286
pif7-2	hAT	2.36		pif7-2	hAT	1.97143
pif3 pif7	hAT	2.32		pif3 pif7	hAT	1.9
pif3 pif7	hAT	1.47		pif3 pif7	hAT	1.49286
pif3 pif7	hAT	1.21		pif3 pif7	hAT	1.2
pif3 pif7	hAT	0.18		pif3 pif7	hAT	0.721429
pif3 pif7	hAT	2.43		pif3 pif7	hAT	1.91429
pif3 pif7	hAT	0.99		pif3 pif7	hAT	1.12857
pif3 pif7	hAT	1.17		pif3 pif7	hAT	1.23571
pif3 pif7	hAT	1.81		pif3 pif7	hAT	1.34286
pif3 pif7	hAT	1.26		pif3 pif7	hAT	1.19286
pif3 pif7	hAT	1.51		pif3 pif7	hAT	1.38571
pifq	hAT	1.13		pifq	hAT	1.42143
pifq	hAT	2.2		pifq	hAT	1.6
pifq	hAT	1.9		pifq	hAT	1.48571
pifq	hAT	2.18		pifq	hAT	1.99286
pifq	hAT	2.34		pifq	hAT	1.83571
pifq	hAT	1.78		pifq	hAT	1.32143
pifq	hAT	1.78		pifq	hAT	1.69286
pifq	hAT	1.75		pifq	hAT	1.7
pifq	hAT	2.36		pifq	hAT	2.2
pifq	hAT	1.94		pifq	hAT	1.56429

## Sheet: StemRGR_(29-39_nAT)vs(27_37hAT)
Line_Condition	Stem_RGR				Tukey multiple comparisons OF means
Col-0_nAT	2,51				95% family-wise confidence level		l
Col-0_nAT	2,65
Col-0_nAT	2,1				Fit: aov(formula = SGR ~ Line_Condition, data =data)
Col-0_nAT	2,68
Col-0_nAT	2,79				Significant differences are highlighted
Col-0_nAT	1,95				$Line_Condition	diff	lwr	upr	p adj
Col-0_nAT	2,91				35S::PIF4_nAT-35S::PIF4_hAT	0.5781	-0.177643	1.33384	0.380483
Col-0_nAT	2,36				Col-0_hAT-35S::PIF4_hAT	0.1481	-0.607643	0.903843	1
Col-0_nAT	2,17				Col-0_nAT-35S::PIF4_hAT	1.1641	0.408357	1.91984	2.56e-05
Col-0_nAT	2,86				phyb_hAT-35S::PIF4_hAT	0.0051	-0.750643	0.760843	1
35S::PIF4_nAT	1,84				phyb_nAT-35S::PIF4_hAT	0.4115	-0.344243	1.16724	0.895489
35S::PIF4_nAT	1,98				pif3_hAT-35S::PIF4_hAT	0.3061	-0.449643	1.06184	0.993444
35S::PIF4_nAT	2,22				pif3_nAT-35S::PIF4_hAT	0.9021	0.146357	1.65784	0.0048135
35S::PIF4_nAT	1,79				pif3pif7_hAT-35S::PIF4_hAT	0.1011	-0.654643	0.856843	1
35S::PIF4_nAT	2,04				pif3pif7_nAT-35S::PIF4_hAT	0.9451	0.189357	1.70084	0.0022122
35S::PIF4_nAT	1,87				pif4_hAT-35S::PIF4_hAT	0.3091	-0.446643	1.06484	0.992705
35S::PIF4_nAT	1,38				pif4_nAT-35S::PIF4_hAT	0.8361	0.0803573	1.59184	0.0147234
35S::PIF4_nAT	2,08				pif7-1_hAT-35S::PIF4_hAT	0.2351	-0.520643	0.990843	0.999736
35S::PIF4_nAT	1,83				pif7-1_nAT-35S::PIF4_hAT	0.7041	-0.0516427	1.45984	0.100097
35S::PIF4_nAT	2,09				pif7-2_hAT-35S::PIF4_hAT	0.5291	-0.226643	1.28484	0.546793
phyb_nAT	1,71				pif7-2_nAT-35S::PIF4_hAT	0.8631	0.107357	1.61884	0.0094276
phyb_nAT	1,22				pifq_hAT-35S::PIF4_hAT	0.6021	-0.153643	1.35784	0.308036
phyb_nAT	1,69				pifq_nAT-35S::PIF4_hAT	0.6261	-0.150352	1.40255	0.287642
phyb_nAT	2,22				Col-0_hAT-35S::PIF4_nAT	-0.43	-1.18574	0.325743	0.856206
phyb_nAT	1,69				Col-0_nAT-35S::PIF4_nAT	0.586	-0.169743	1.34174	0.355776
phyb_nAT	1,71				phyb_hAT-35S::PIF4_nAT	-0.573	-1.32874	0.182743	0.396837
phyb_nAT	2264				phyb_nAT-35S::PIF4_nAT	-0.1666	-0.922343	0.589143	0.999998
phyb_nAT	1,47				pif3_hAT-35S::PIF4_nAT	-0.272	-1.02774	0.483743	0.998326
phyb_nAT	1,6				pif3_nAT-35S::PIF4_nAT	0.324	-0.431743	1.07974	0.987948
phyb_nAT	1,88				pif3pif7_hAT-35S::PIF4_nAT	-0.477	-1.23274	0.278743	0.725001
pif3_nAT	2,08				pif3pif7_nAT-35S::PIF4_nAT	0.367	-0.388743	1.12274	0.959509
pif3_nAT	2,59				pif4_hAT-35S::PIF4_nAT	-0.269	-1.02474	0.486743	0.998537
pif3_nAT	2,02				pif4_nAT-35S::PIF4_nAT	0.258	-0.497743	1.01374	0.999126
pif3_nAT	2,41				pif7-1_hAT-35S::PIF4_nAT	-0.343	-1.09874	0.412743	0.97856
pif3_nAT	2,4				pif7-1_nAT-35S::PIF4_nAT	0.126	-0.629743	0.881743	1
pif3_nAT	2,33				pif7-2_hAT-35S::PIF4_nAT	-0.049	-0.804743	0.706743	1
pif3_nAT	2,07				pif7-2_nAT-35S::PIF4_nAT	0.285	-0.470743	1.04074	0.997084
pif3_nAT	1,94				pifq_hAT-35S::PIF4_nAT	0.024	-0.731743	0.779743	1
pif3_nAT	1,85				pifq_nAT-35S::PIF4_nAT	0.048	-0.728452	0.824452	1
pif3_nAT	2,67				Col-0_nAT-Col-0_hAT	1.016	0.260257	1.77174	0.000569
pif4_nAT	2,45				phyb_hAT-Col-0_hAT	-0.143	-0.898743	0.612743	1
pif4_nAT	2,7				phyb_nAT-Col-0_hAT	0.2634	-0.492343	1.01914	0.998869
pif4_nAT	0				pif3_hAT-Col-0_hAT	0.158	-0.597743	0.913743	0.999999
pif4_nAT	2,21				pif3_nAT-Col-0_hAT	0.754	-0.00174269	1.50974	0.0512482
pif4_nAT	2,77				pif3pif7_hAT-Col-0_hAT	-0.047	-0.802743	0.708743	1
pif4_nAT	2,28				pif3pif7_nAT-Col-0_hAT	0.797	0.0412573	1.55274	0.0272391
pif4_nAT	2,08				pif4_hAT-Col-0_hAT	0.161	-0.594743	0.916743	0.999999
pif4_nAT	2,2				pif4_nAT-Col-0_hAT	0.688	-0.0677427	1.44374	0.122283
pif4_nAT	2,42				pif7-1_hAT-Col-0_hAT	0.087	-0.668743	0.842743	1
pif4_nAT	2,59				pif7-1_nAT-Col-0_hAT	0.556	-0.199743	1.31174	0.453311
pif7-1_nAT	2,8				pif7-2_hAT-Col-0_hAT	0.381	-0.374743	1.13674	0.94377
pif7-1_nAT	1,14				pif7-2_nAT-Col-0_hAT	0.715	-0.0407427	1.47074	0.0870174
pif7-1_nAT	2,05				pifq_hAT-Col-0_hAT	0.454	-0.301743	1.20974	0.794318
pif7-1_nAT	1,98				pifq_nAT-Col-0_hAT	0.478	-0.298452	1.25445	0.761487
pif7-1_nAT	2,58				phyb_hAT-Col-0_nAT	-1.159	-1.91474	-0.403257	2.86e-05
pif7-1_nAT	2,05				phyb_nAT-Col-0_nAT	-0.7526	-1.50834	0.00314269	0.0522703
pif7-1_nAT	1,29				pif3_hAT-Col-0_nAT	-0.858	-1.61374	-0.102257	0.0102688
pif7-1_nAT	1,79				pif3_nAT-Col-0_nAT	-0.262	-1.01774	0.493743	0.998942
pif7-1_nAT	2,56				pif3pif7_hAT-Col-0_nAT	-1.063	-1.81874	-0.307257	0.0002205
pif7-1_nAT	2,14				pif3pif7_nAT-Col-0_nAT	-0.219	-0.974743	0.536743	0.999898
pif7-2_nAT	2,19				pif4_hAT-Col-0_nAT	-0.855	-1.61074	-0.0992573	0.0107953
pif7-2_nAT	2,33				pif4_nAT-Col-0_nAT	-0.328	-1.08374	0.427743	0.986316
pif7-2_nAT	2,22				pif7-1_hAT-Col-0_nAT	-0.929	-1.68474	-0.173257	0.0029724
pif7-2_nAT	2,27				pif7-1_nAT-Col-0_nAT	-0.46	-1.21574	0.295743	0.777085
pif7-2_nAT	2,78				pif7-2_hAT-Col-0_nAT	-0.635	-1.39074	0.120743	0.22282
pif7-2_nAT	1,88				pif7-2_nAT-Col-0_nAT	-0.301	-1.05674	0.454743	0.994558
pif7-2_nAT	2,34				pifq_hAT-Col-0_nAT	-0.562	-1.31774	0.193743	0.433068
pif7-2_nAT	2,41				pifq_nAT-Col-0_nAT	-0.538	-1.31445	0.238452	0.56599
pif7-2_nAT	1,84				phyb_nAT-phyb_hAT	0.4064	-0.349343	1.16214	0.904976
pif7-2_nAT	1,71				pif3_hAT-phyb_hAT	0.301	-0.454743	1.05674	0.994558
pif3pif7_nAT	2,02				pif3_nAT-phyb_hAT	0.897	0.141257	1.65274	0.0052654
pif3pif7_nAT	2,5				pif3pif7_hAT-phyb_hAT	0.096	-0.659743	0.851743	1
pif3pif7_nAT	2,78				pif3pif7_nAT-phyb_hAT	0.94	0.184257	1.69574	0.0024305
pif3pif7_nAT	2,09				pif4_hAT-phyb_hAT	0.304	-0.451743	1.05974	0.993924
pif3pif7_nAT	2,19				pif4_nAT-phyb_hAT	0.831	0.0752573	1.58674	0.0159867
pif3pif7_nAT	2,02				pif7-1_hAT-phyb_hAT	0.23	-0.525743	0.985743	0.999802
pif3pif7_nAT	2,01				pif7-1_nAT-phyb_hAT	0.699	-0.0567427	1.45474	0.106743
pif3pif7_nAT	2,01				pif7-2_hAT-phyb_hAT	0.524	-0.231743	1.27974	0.56476
pif3pif7_nAT	2,63				pif7-2_nAT-phyb_hAT	0.858	0.102257	1.61374	0.0102688
pif3pif7_nAT	2,54				pifq_hAT-phyb_hAT	0.597	-0.158743	1.35274	0.322758
pifq_nAT	1,46				pifq_nAT-phyb_hAT	0.621	-0.155452	1.39745	0.301419
pifq_nAT	1,99				pif3_hAT-phyb_nAT	-0.1054	-0.861143	0.650343	1
pifq_nAT	1,98				pif3_nAT-phyb_nAT	0.4906	-0.265143	1.24634	0.680459
pifq_nAT	1,95				pif3pif7_hAT-phyb_nAT	-0.3104	-1.06614	0.445343	0.992364
pifq_nAT	2,2				pif3pif7_nAT-phyb_nAT	0.5336	-0.222143	1.28934	0.530961
pifq_nAT	2,07				pif4_hAT-phyb_nAT	-0.1024	-0.858143	0.653343	1
pifq_nAT	1,95				pif4_nAT-phyb_nAT	0.4246	-0.331143	1.18034	0.868457
pifq_nAT	1,93				pif7-1_hAT-phyb_nAT	-0.1764	-0.932143	0.579343	0.999995
pifq_nAT	2,11				pif7-1_nAT-phyb_nAT	0.2926	-0.463143	1.04834	0.996048
Col-0_hAT	1,31				pif7-2_hAT-phyb_nAT	0.1176	-0.638143	0.873343	1
Col-0_hAT	0,78				pif7-2_nAT-phyb_nAT	0.4516	-0.304143	1.20734	0.801025
Col-0_hAT	1,67				pifq_hAT-phyb_nAT	0.1906	-0.565143	0.946343	0.999985
Col-0_hAT	1,21				pifq_nAT-phyb_nAT	0.2146	-0.561852	0.991052	0.999947
Col-0_hAT	1,94				pif3_nAT-pif3_hAT	0.596	-0.159743	1.35174	0.325689
Col-0_hAT	1,68				pif3pif7_hAT-pif3_hAT	-0.205	-0.960743	0.550743	0.999959
Col-0_hAT	1,58				pif3pif7_nAT-pif3_hAT	0.639	-0.116743	1.39474	0.213657
Col-0_hAT	2,5				pif4_hAT-pif3_hAT	0.003	-0.752743	0.758743	1
Col-0_hAT	1,61				pif4_nAT-pif3_hAT	0.53	-0.225743	1.28574	0.543624
Col-0_hAT	0,54				pif7-1_hAT-pif3_hAT	-0.071	-0.826743	0.684743	1
35S::PIF4_hAT	0,72				pif7-1_nAT-pif3_hAT	0.398	-0.357743	1.15374	0.919344
35S::PIF4_hAT	1,07				pif7-2_hAT-pif3_hAT	0.223	-0.532743	0.978743	0.99987
35S::PIF4_hAT	0,89				pif7-2_nAT-pif3_hAT	0.557	-0.198743	1.31274	0.449916
35S::PIF4_hAT	1,14				pifq_hAT-pif3_hAT	0.296	-0.459743	1.05174	0.995493
35S::PIF4_hAT	1059				pifq_nAT-pif3_hAT	0.32	-0.456452	1.09645	0.992075
35S::PIF4_hAT	1,3				pif3pif7_hAT-pif3_nAT	-0.801	-1.55674	-0.0452573	0.0256215
35S::PIF4_hAT	1,19				pif3pif7_nAT-pif3_nAT	0.043	-0.712743	0.798743	1
35S::PIF4_hAT	2,39				pif4_hAT-pif3_nAT	-0.593	-1.34874	0.162743	0.334569
35S::PIF4_hAT	2,02				pif4_nAT-pif3_nAT	-0.066	-0.821743	0.689743	1
35S::PIF4_hAT	1,56				pif7-1_hAT-pif3_nAT	-0.667	-1.42274	0.0887427	0.156833
phyb_hAT	0,91				pif7-1_nAT-pif3_nAT	-0.198	-0.953743	0.557743	0.999975
phyb_hAT	0,96				pif7-2_hAT-pif3_nAT	-0.373	-1.12874	0.382743	0.953221
phyb_hAT	1,72				pif7-2_nAT-pif3_nAT	-0.039	-0.794743	0.716743	1
phyb_hAT	0,81				pifq_hAT-pif3_nAT	-0.3	-1.05574	0.455743	0.994757
phyb_hAT	1,79				pifq_nAT-pif3_nAT	-0.276	-1.05245	0.500452	0.99856
phyb_hAT	2,03				pif3pif7_nAT-pif3pif7_hAT	0.844	0.0882573	1.59974	0.0129451
phyb_hAT	0,88				pif4_hAT-pif3pif7_hAT	0.208	-0.547743	0.963743	0.99995
phyb_hAT	1,92				pif4_nAT-pif3pif7_hAT	0.735	-0.0207427	1.49074	0.0666886
phyb_hAT	1,3				pif7-1_hAT-pif3pif7_hAT	0.134	-0.621743	0.889743	1
phyb_hAT	1,07				pif7-1_nAT-pif3pif7_hAT	0.603	-0.152743	1.35874	0.305478
pif3_hAT	2,7				pif7-2_hAT-pif3pif7_hAT	0.428	-0.327743	1.18374	0.860818
pif3_hAT	1,56				pif7-2_nAT-pif3pif7_hAT	0.762	0.00625731	1.51774	0.0457324
pif3_hAT	1,49				pifq_hAT-pif3pif7_hAT	0.501	-0.254743	1.25674	0.645122
pif3_hAT	1,61				pifq_nAT-pif3pif7_hAT	0.525	-0.251452	1.30145	0.610438
pif3_hAT	2,42				pif4_hAT-pif3pif7_nAT	-0.636	-1.39174	0.119743	0.220504
pif3_hAT	1,61				pif4_nAT-pif3pif7_nAT	-0.109	-0.864743	0.646743	1
pif3_hAT	1,89				pif7-1_hAT-pif3pif7_nAT	-0.71	-1.46574	0.0457427	0.0928315
pif3_hAT	0,84				pif7-1_nAT-pif3pif7_nAT	-0.241	-0.996743	0.514743	0.999634
pif3_hAT	0,47				pif7-2_hAT-pif3pif7_nAT	-0.416	-1.17174	0.339743	0.886635
pif3_hAT	1,81				pif7-2_nAT-pif3pif7_nAT	-0.082	-0.837743	0.673743	1
pif4_hAT	1,22				pifq_hAT-pif3pif7_nAT	-0.343	-1.09874	0.412743	0.97856
pif4_hAT	1,06				pifq_nAT-pif3pif7_nAT	-0.319	-1.09545	0.457452	0.99234
pif4_hAT	1,73				pif4_nAT-pif4_hAT	0.527	-0.228743	1.28274	0.55419
pif4_hAT	1,94				pif7-1_hAT-pif4_hAT	-0.074	-0.829743	0.681743	1
pif4_hAT	2,15				pif7-1_nAT-pif4_hAT	0.395	-0.360743	1.15074	0.9241
pif4_hAT	1,14				pif7-2_hAT-pif4_hAT	0.22	-0.535743	0.975743	0.999892
pif4_hAT	1,13				pif7-2_nAT-pif4_hAT	0.554	-0.201743	1.30974	0.460123
pif4_hAT	1,97				pifq_hAT-pif4_hAT	0.293	-0.462743	1.04874	0.995986
pif4_hAT	1,76				pifq_nAT-pif4_hAT	0.317	-0.459452	1.09345	0.992847
pif4_hAT	2,33				pif7-1_hAT-pif4_nAT	-0.601	-1.35674	0.154743	0.311179
pif7-1_hAT	1,15				pif7-1_nAT-pif4_nAT	-0.132	-0.887743	0.623743	1
pif7-1_hAT	1,25				pif7-2_hAT-pif4_nAT	-0.307	-1.06274	0.448743	0.993229
pif7-1_hAT	1,35				pif7-2_nAT-pif4_nAT	0.027	-0.728743	0.782743	1
pif7-1_hAT	1,62				pifq_hAT-pif4_nAT	-0.234	-0.989743	0.521743	0.999752
pif7-1_hAT	1,31				pifq_nAT-pif4_nAT	-0.21	-0.986452	0.566452	0.999961
pif7-1_hAT	2,5				pif7-1_nAT-pif7-1_hAT	0.469	-0.286743	1.22474	0.750072
pif7-1_hAT	1,46				pif7-2_hAT-pif7-1_hAT	0.294	-0.461743	1.04974	0.995827
pif7-1_hAT	1,93				pif7-2_nAT-pif7-1_hAT	0.628	-0.127743	1.38374	0.239487
pif7-1_hAT	1,05				pifq_hAT-pif7-1_hAT	0.367	-0.388743	1.12274	0.959509
pif7-1_hAT	2,07				pifq_nAT-pif7-1_hAT	0.391	-0.385452	1.16745	0.944308
pif7-2_hAT	1,72				pif7-2_hAT-pif7-1_nAT	-0.175	-0.930743	0.580743	0.999996
pif7-2_hAT	1,72				pif7-2_nAT-pif7-1_nAT	0.159	-0.596743	0.914743	0.999999
pif7-2_hAT	2,65				pifq_hAT-pif7-1_nAT	-0.102	-0.857743	0.653743	1
pif7-2_hAT	1,55				pifq_nAT-pif7-1_nAT	-0.078	-0.854452	0.698452	1
pif7-2_hAT	1,21				pif7-2_nAT-pif7-2_hAT	0.334	-0.421743	1.08974	0.98354
pif7-2_hAT	1,4				pifq_hAT-pif7-2_hAT	0.073	-0.682743	0.828743	1
pif7-2_hAT	1,28				pifq_nAT-pif7-2_hAT	0.097	-0.679452	0.873452	1
pif7-2_hAT	1,88				pifq_hAT-pif7-2_nAT	-0.261	-1.01674	0.494743	0.998991
pif7-2_hAT	2,86				pifq_nAT-pif7-2_nAT	-0.237	-1.01345	0.539452	0.999795
pif7-2_hAT	2,36				pifq_nAT-pifq_hAT	0.024	-0.752452	0.800452	1
pif3pif7_hAT	2,32
pif3pif7_hAT	1,47
pif3pif7_hAT	1,21
pif3pif7_hAT	0,18
pif3pif7_hAT	2,43
pif3pif7_hAT	0,99
pif3pif7_hAT	1,17
pif3pif7_hAT	1,81
pif3pif7_hAT	1,26
pif3pif7_hAT	1,51
pifq_hAT	1,13
pifq_hAT	2,2
pifq_hAT	1,9
pifq_hAT	2,18
pifq_hAT	2,34
pifq_hAT	1,78
pifq_hAT	1,78
pifq_hAT	1,75
pifq_hAT	2,36
pifq_hAT	1,94

## Sheet: StemRGR(29_49nAT_vs_27_41hAT)
Line_Condition	Stem_RGR		tukey_result
Col-0_hAT	0.935714		Tukey multiple comparisons of means
Col-0_hAT	0.907143		95% family-wise confidence level
Col-0_hAT	1.27143		Fit: aov(formula = RGR ~ Line_Condition, data=data)
Col-0_hAT	0.935714
Col-0_hAT	1.38571
Col-0_hAT	1.2		Significant differences are highlighted
Col-0_hAT	1.23571		$Line_Condition	diff	lwr	upr	p adj
Col-0_hAT	1.78571		35S::PIF4_nAT-35S::PIF4_hAT	0.478	-0.0067459	0.962746	0.0579486
Col-0_hAT	1.15		Col-0_hAT-35S::PIF4_hAT	0.127214	-0.357532	0.61196	0.999974
Col-0_hAT	0.4		Col-0_nAT-35S::PIF4_hAT	0.7345	0.249754	1.21925	3.88e-05
35S::PIF4_hAT	0.55		phyb_hAT-35S::PIF4_hAT	0.167929	-0.316817	0.652674	0.998951
35S::PIF4_hAT	0.807143		phyb_nAT-35S::PIF4_hAT	0.0132	-0.471546	0.497946	1
35S::PIF4_hAT	0.657143		pif3_hAT-35S::PIF4_hAT	0.153643	-0.331103	0.638389	0.999662
35S::PIF4_hAT	0.9		pif3_nAT-35S::PIF4_hAT	0.494	0.0092541	0.978746	0.0406389
35S::PIF4_hAT	0.892143		pif3pif7_hAT-35S::PIF4_hAT	0.357929	-0.126817	0.842674	0.446434
35S::PIF4_hAT	0.928571		pif3pif7_nAT-35S::PIF4_hAT	0.7525	0.267754	1.23725	2.09e-05
35S::PIF4_hAT	0.921429		pif4_hAT-35S::PIF4_hAT	0.507929	0.0231827	0.992674	0.0294397
35S::PIF4_hAT	1.71429		pif4_nAT-35S::PIF4_hAT	0.588	0.103254	1.07275	0.0037107
35S::PIF4_hAT	1.45		pif7-1_hAT-35S::PIF4_hAT	0.2765	-0.208246	0.761246	0.853687
35S::PIF4_hAT	1.11429		pif7-1_nAT-35S::PIF4_hAT	0.7925	0.307754	1.27725	5.1e-06
phyb_hAT	1		pif7-2_hAT-35S::PIF4_hAT	0.650786	0.16604	1.13553	0.0005849
phyb_hAT	1.10714		pif7-2_nAT-35S::PIF4_hAT	0.9235	0.438754	1.40825	0
phyb_hAT	1.22857		pifq_hAT-35S::PIF4_hAT	0.687929	0.203183	1.17267	0.0001812
phyb_hAT	0.928571		pifq_nAT-35S::PIF4_hAT	0.690389	0.19236	1.18842	0.0003018
phyb_hAT	1.63571		Col-0_hAT-35S::PIF4_nAT -	0.350786	-0.835532	0.13396	0.48456
phyb_hAT	1.52143		Col-0_nAT-35S::PIF4_nAT	0.2565	-0.228246	0.741246	0.916236
phyb_hAT	0.842857		phyb_hAT-35S::PIF4_nAT -	0.310071	-0.794817	0.174674	0.704258
phyb_hAT	1.42857		phyb_nAT-35S::PIF4_nAT -	0.4648	-0.949546	0.0199459	0.0766489
phyb_hAT	1.07143		pif3_hAT-35S::PIF4_nAT -	0.324357	-0.809103	0.160389	0.628925
phyb_hAT	0.85		pif3_nAT-35S::PIF4_nAT	0.016	-0.468746	0.500746	1
pif3_hAT	0.928571		pif3pif7_hAT-35S::PIF4_nAT -	0.120071	-0.604817	0.364674	0.999989
pif3_hAT	1.24286		pif3pif7_nAT-35S::PIF4_nAT	0.2745	-0.210246	0.759246	0.860912
pif3_hAT	1.14286		pif4_hAT-35S::PIF4_nAT	0.0299286	-0.454817	0.514674	1
pif3_hAT	0.635714		pif4_nAT-35S::PIF4_nAT	0.11	-0.374746	0.594746	0.999997
pif3_hAT	1.77143		pif7-1_hAT-35S::PIF4_nAT -	0.2015	-0.686246	0.283246	0.991307
pif3_hAT	1.03571		pif7-1_nAT-35S::PIF4_nAT	0.3145	-0.170246	0.799246	0.681394
pif3_hAT	1.40714		pif7-2_hAT-35S::PIF4_nAT	0.172786	-0.31196	0.657532	0.998511
pif3_hAT	0.978571		pif7-2_nAT-35S::PIF4_nAT	0.4455	-0.0392459	0.930246	0.112819
pif3_hAT	0.85		pifq_hAT-35S::PIF4_nAT	0.209929	-0.274817	0.694674	0.986618
pif3_hAT	1.47857		pifq_nAT-35S::PIF4_nAT	0.212389	-0.28564	0.710418	0.988595
pif4_hAT	1.75		Col-0_nAT-Col-0_hAT	0.607286	0.12254	1.09203	0.0021441
pif4_hAT	1.25714		phyb_hAT-Col-0_hAT	0.0407143	-0.444032	0.52546	1
pif4_hAT	1.52143		phyb_nAT-Col-0_hAT -	0.114014	-0.59876	0.370732	0.999995
pif4_hAT	1.91429		pif3_hAT-Col-0_hAT	0.0264286	-0.458317	0.511174	1
pif4_hAT	1.55714		pif3_nAT-Col-0_hAT	0.366786	-0.11796	0.851532	0.400608
pif4_hAT	0.835714		pif3pif7_hAT-Col-0_hAT	0.230714	-0.254032	0.71546	0.966294
pif4_hAT	1.02143		pif3pif7_nAT-Col-0_hAT	0.625286	0.14054	1.11003	0.0012652
pif4_hAT	1.62143		pif4_hAT-Col-0_hAT	0.380714	-0.104032	0.86546	0.332925
pif4_hAT	1.37143		pif4_nAT-Col-0_hAT	0.460786	-0.0239602	0.945532	0.0832514
pif4_hAT	2.16429		pif7-1_hAT-Col-0_hAT	0.149286	-0.33546	0.634032	0.999769
pif7-1_hAT	0.864286		pif7-1_nAT-Col-0_hAT	0.665286	0.18054	1.15003	0.0003726
pif7-1_hAT	0.8		pif7-2_hAT-Col-0_hAT	0.523571	0.0388255	1.00832	0.0202068
pif7-1_hAT	1.02143		pif7-2_nAT-Col-0_hAT	0.796286	0.31154	1.28103	4.5e-06
pif7-1_hAT	1.17857		pifq_hAT-Col-0_hAT	0.560714	0.0759684	1.04546	0.0078143
pif7-1_hAT	1.03571		pifq_nAT-Col-0_hAT	0.563175	0.0651455	1.0612	0.0108675
pif7-1_hAT	1.9		phyb_hAT-Col-0_nAT -	0.566571	-1.05132	-0.0818255	0.0066812
pif7-1_hAT	2.07857		phyb_nAT-Col-0_nAT -	0.7213	-1.20605	-0.236554	6.05e-05
pif7-1_hAT	1.37857		pif3_hAT-Col-0_nAT -	0.580857	-1.0656	-0.0961112	0.0045258
pif7-1_hAT	0.892857		pif3_nAT-Col-0_nAT -	0.2405	-0.725246	0.244246	0.951031
pif7-1_hAT	1.55		pif3pif7_hAT-Col-0_nAT -	0.376571	-0.861317	0.108174	0.35242
pif7-2_hAT	1.27857		pif3pif7_nAT-Col-0_nAT	0.018	-0.466746	0.502746	1
pif7-2_hAT	1.26429		pif4_hAT-Col-0_nAT -	0.226571	-0.711317	0.258174	0.971546
pif7-2_hAT	1.91429		pif4_nAT-Col-0_nAT -	0.1465	-0.631246	0.338246	0.99982
pif7-2_hAT	1.10714		pif7-1_hAT-Col-0_nAT -	0.458	-0.942746	0.0267459	0.0881047
pif7-2_hAT	1.33571		pif7-1_nAT-Col-0_nAT	0.058	-0.426746	0.542746	1
pif7-2_hAT	1.61429		pif7-2_hAT-Col-0_nAT -	0.0837143	-0.56846	0.401032	1
pif7-2_hAT	1.34286		pif7-2_nAT-Col-0_nAT	0.189	-0.295746	0.673746	0.995719
pif7-2_hAT	2.07143		pifq_hAT-Col-0_nAT -	0.0465714	-0.531317	0.438174	1
pif7-2_hAT	2.54286		pifq_nAT-Col-0_nAT -	0.0441111	-0.54214	0.453918	1
pif7-2_hAT	1.97143		phyb_nAT-phyb_hAT -	0.154729	-0.639474	0.330017	0.99963
pif3pif7_hAT	1.9		pif3_hAT-phyb_hAT -	0.0142857	-0.499032	0.47046	1
pif3pif7_hAT	1.49286		pif3_nAT-phyb_hAT	0.326071	-0.158674	0.810817	0.619635
pif3pif7_hAT	1.2		pif3pif7_hAT-phyb_hAT	0.19	-0.294746	0.674746	0.995455
pif3pif7_hAT	0.721429		pif3pif7_nAT-phyb_hAT	0.584571	0.0998255	1.06932	0.0040831
pif3pif7_hAT	1.91429		pif4_hAT-phyb_hAT	0.34	-0.144746	0.824746	0.543354
pif3pif7_hAT	1.12857		pif4_nAT-phyb_hAT	0.420071	-0.0646745	0.904817	0.17981
pif3pif7_hAT	1.23571		pif7-1_hAT-phyb_hAT	0.108571	-0.376174	0.593317	0.999997
pif3pif7_hAT	1.34286		pif7-1_nAT-phyb_hAT	0.624571	0.139826	1.10932	0.0012924
pif3pif7_hAT	1.19286		pif7-2_hAT-phyb_hAT	0.482857	-0.00188876	0.967603	0.0521246
pif3pif7_hAT	1.38571		pif7-2_nAT-phyb_hAT	0.755571	0.270826	1.24032	1.88e-05
pifq_hAT	1.42143		pifq_hAT-phyb_hAT	0.52	0.0352541	1.00475	0.0220482
pifq_hAT	1.6		pifq_nAT-phyb_hAT	0.52246	0.0244312	1.02049	0.0290279
pifq_hAT	1.48571		pif3_hAT-phyb_nAT	0.140443	-0.344303	0.625189	0.999898
pifq_hAT	1.99286		pif3_nAT-phyb_nAT	0.4808	-0.0039459	0.965546	0.0545267
pifq_hAT	1.83571		pif3pif7_hAT-phyb_nAT	0.344729	-0.140017	0.829474	0.517457
pifq_hAT	1.32143		pif3pif7_nAT-phyb_nAT	0.7393	0.254554	1.22405	3.29e-05
pifq_hAT	1.69286		pif4_hAT-phyb_nAT	0.494729	0.00998267	0.979474	0.0399715
pifq_hAT	1.7		pif4_nAT-phyb_nAT	0.5748	0.0900541	1.05955	0.0053453
pifq_hAT	2.2		pif7-1_hAT-phyb_nAT	0.2633	-0.221446	0.748046	0.897399
pifq_hAT	1.56429		pif7-1_nAT-phyb_nAT	0.7793	0.294554	1.26405	8.2e-06
Col-0_nAT	1.245		pif7-2_hAT-phyb_nAT	0.637586	0.15284	1.12233	0.0008751
Col-0_nAT	1.57		pif7-2_nAT-phyb_nAT	0.9103	0.425554	1.39505	1e-07
Col-0_nAT	1.865		pifq_hAT-phyb_nAT	0.674729	0.189983	1.15947	0.0002765
Col-0_nAT	2.19		pifq_nAT-phyb_nAT	0.677189	0.17916	1.17522	0.0004517
Col-0_nAT	1.63		pif3_nAT-pif3_hAT	0.340357	-0.144389	0.825103	0.541394
Col-0_nAT	1.6		pif3pif7_hAT-pif3_hAT	0.204286	-0.28046	0.689032	0.989935
Col-0_nAT	2.105		pif3pif7_nAT-pif3_hAT	0.598857	0.114111	1.0836	0.0027309
Col-0_nAT	1.46		pif4_hAT-pif3_hAT	0.354286	-0.13046	0.839032	0.46577
Col-0_nAT	1.865		pif4_nAT-pif3_hAT	0.434357	-0.0503888	0.919103	0.13925
Col-0_nAT	1.75		pif7-1_hAT-pif3_hAT	0.122857	-0.361889	0.607603	0.999984
35S::PIF4_nAT	1.62		pif7-1_nAT-pif3_hAT	0.638857	0.154111	1.1236	0.000842
35S::PIF4_nAT	1.495		pif7-2_hAT-pif3_hAT	0.497143	0.012397	0.981889	0.0378283
35S::PIF4_nAT	1.885		pif7-2_nAT-pif3_hAT	0.769857	0.285111	1.2546	1.14e-05
35S::PIF4_nAT	1.16		pifq_hAT-pif3_hAT	0.534286	0.0495398	1.01903	0.0154856
35S::PIF4_nAT	1.595		pifq_nAT-pif3_hAT	0.536746	0.038717	1.03478	0.0207795
35S::PIF4_nAT	1.22		pif3pif7_hAT-pif3_nAT -	0.136071	-0.620817	0.348674	0.999934
35S::PIF4_nAT	1.6		pif3pif7_nAT-pif3_nAT	0.2585	-0.226246	0.743246	0.910955
35S::PIF4_nAT	1.88		pif4_hAT-pif3_nAT	0.0139286	-0.470817	0.498674	1
35S::PIF4_nAT	1.28		pif4_nAT-pif3_nAT	0.094	-0.390746	0.578746	1
35S::PIF4_nAT	0.98		pif7-1_hAT-pif3_nAT -	0.2175	-0.702246	0.267246	0.980849
phyb_nAT	0.72		pif7-1_nAT-pif3_nAT	0.2985	-0.186246	0.783246	0.761109
phyb_nAT	0.765		pif7-2_hAT-pif3_nAT	0.156786	-0.32796	0.641532	0.99956
phyb_nAT	1.06		pif7-2_nAT-pif3_nAT	0.4295	-0.0552459	0.914246	0.152172
phyb_nAT	1.465		pifq_hAT-pif3_nAT	0.193929	-0.290817	0.678674	0.994281
phyb_nAT	0.99		pifq_nAT-pif3_nAT	0.196389	-0.30164	0.694418	0.995134
phyb_nAT	1.155		pif3pif7_nAT-pif3pif7_hAT	0.394571	-0.0901745	0.879317	0.272149
phyb_nAT	0.942		pif4_hAT-pif3pif7_hAT	0.15	-0.334746	0.634746	0.999754
phyb_nAT	0.765		pif4_nAT-pif3pif7_hAT	0.230071	-0.254674	0.714817	0.967153
phyb_nAT	1.09		pif7-1_hAT-pif3pif7_hAT -	0.0814286	-0.566174	0.403317	1
phyb_nAT	1.115		pif7-1_nAT-pif3pif7_hAT	0.434571	-0.0501745	0.919317	0.1387
pif3_nAT	1.37		pif7-2_hAT-pif3pif7_hAT	0.292857	-0.191889	0.777603	0.786991
pif3_nAT	1.325		pif7-2_nAT-pif3pif7_hAT	0.565571	0.0808255	1.05032	0.0068632
pif3_nAT	1.28		pifq_hAT-pif3pif7_hAT	0.33	-0.154746	0.814746	0.598223
pif3_nAT	1.815		pifq_nAT-pif3pif7_hAT	0.33246	-0.165569	0.830489	0.633053
pif3_nAT	1.53		pif4_hAT-pif3pif7_nAT -	0.244571	-0.729317	0.240174	0.943392
pif3_nAT	1.77		pif4_nAT-pif3pif7_nAT -	0.1645	-0.649246	0.320246	0.999189
pif3_nAT	1.62		pif7-1_hAT-pif3pif7_nAT -	0.476	-0.960746	0.0087459	0.0605037
pif3_nAT	1.07		pif7-1_nAT-pif3pif7_nAT	0.04	-0.444746	0.524746	1
pif3_nAT	1.475		pif7-2_hAT-pif3pif7_nAT -	0.101714	-0.58646	0.383032	0.999999
pif3_nAT	1.62		pif7-2_nAT-pif3pif7_nAT	0.171	-0.313746	0.655746	0.998689
pif4_nAT	1.475		pifq_hAT-pif3pif7_nAT -	0.0645714	-0.549317	0.420174	1
pif4_nAT	1.74		pifq_nAT-pif3pif7_nAT -	0.0621111	-0.56014	0.435918	1
pif4_nAT	0.9		pif4_nAT-pif4_hAT	0.0800714	-0.404674	0.564817	1
pif4_nAT	1.415		pif7-1_hAT-pif4_hAT -	0.231429	-0.716174	0.253317	0.965319
pif4_nAT	1.4		pif7-1_nAT-pif4_hAT	0.284571	-0.200174	0.769317	0.822419
pif4_nAT	1.735		pif7-2_hAT-pif4_hAT	0.142857	-0.341889	0.627603	0.999872
pif4_nAT	1.545		pif7-2_nAT-pif4_hAT	0.415571	-0.0691745	0.900317	0.194223
pif4_nAT	1.89		pifq_hAT-pif4_hAT	0.18	-0.304746	0.664746	0.997568
pif4_nAT	1.805		pifq_nAT-pif4_hAT	0.18246	-0.315569	0.680489	0.997928
pif4_nAT	1.91		pif7-1_hAT-pif4_nAT -	0.3115	-0.796246	0.173246	0.69694
pif7-1_nAT	1.9		pif7-1_nAT-pif4_nAT	0.2045	-0.280246	0.689246	0.989823
pif7-1_nAT	1.85		pif7-2_hAT-pif4_nAT	0.0627857	-0.42196	0.547532	1
pif7-1_nAT	1.64		pif7-2_nAT-pif4_nAT	0.3355	-0.149246	0.820246	0.568068
pif7-1_nAT	1.8		pifq_hAT-pif4_nAT	0.0999286	-0.384817	0.584674	0.999999
pif7-1_nAT	1.635		pifq_nAT-pif4_nAT	0.102389	-0.39564	0.600418	0.999999
pif7-1_nAT	1.9		pif7-1_nAT-pif7-1_hAT	0.516	0.0312541	1.00075	0.0242887
pif7-1_nAT	1.83		pif7-2_hAT-pif7-1_hAT	0.374286	-0.11046	0.859032	0.363416
pif7-1_nAT	1.85		pif7-2_nAT-pif7-1_hAT	0.647	0.162254	1.13175	0.000657
pif7-1_nAT	1.625		pifq_hAT-pif7-1_hAT	0.411429	-0.0733173	0.896174	0.208204
pif7-1_nAT	1.83		pifq_nAT-pif7-1_hAT	0.413889	-0.0841402	0.911918	0.239335
pif7-2_nAT	1.99		pif7-2_hAT-pif7-1_nAT -	0.141714	-0.62646	0.343032	0.999885
pif7-2_nAT	1.81		pif7-2_nAT-pif7-1_nAT	0.131	-0.353746	0.615746	0.999961
pif7-2_nAT	2		pifq_hAT-pif7-1_nAT -	0.104571	-0.589317	0.380174	0.999999
pif7-2_nAT	2.1		pifq_nAT-pif7-1_nAT -	0.102111	-0.60014	0.395918	0.999999
pif7-2_nAT	1.89		pif7-2_nAT-pif7-2_hAT	0.272714	-0.212032	0.75746	0.867183
pif7-2_nAT	1.83		pifq_hAT-pif7-2_hAT	0.0371429	-0.447603	0.521889	1
pif7-2_nAT	2		pifq_nAT-pif7-2_hAT	0.0396032	-0.458426	0.537632	1
pif7-2_nAT	1.715		pifq_hAT-pif7-2_nAT -	0.235571	-0.720317	0.249174	0.959243
pif7-2_nAT	1.985		pifq_nAT-pif7-2_nAT -	0.233111	-0.73114	0.264918	0.971161
pif7-2_nAT	1.85		pifq_nAT-pifq_hAT	0.00246032	-0.495569	0.500489	1
pif3pif7_nAT	1.64
pif3pif7_nAT	2
pif3pif7_nAT	1.87
pif3pif7_nAT	1.675
pif3pif7_nAT	1.74
pif3pif7_nAT	1.565
pif3pif7_nAT	1.65
pif3pif7_nAT	1.7
pif3pif7_nAT	1.465
pif3pif7_nAT	2.155
pifq_nAT	1.85
pifq_nAT	1.795
pifq_nAT	1.75
pifq_nAT	1.65
pifq_nAT	1.62
pifq_nAT	1.57
pifq_nAT	1.67
pifq_nAT	1.575
pifq_nAT	1.675

## Sheet: rosette aera_nAT
Plant Info	Measuring Date	rosette area (mm2)			Plant Info	Measuring Date	rosette area (mm2)	Plant Info	Measuring Date	rosette area (mm2)	RGR 20-27			Plant Info	Measuring Date	rosette area (mm2)	Plant Info	Measuring Date	rosette area (mm2)	RGR 28-35
Col-0	9	17.2914			Col-0	20	151.154	Col-0	27	796.971	92.2596			Col-0	28	1014.38	Col-0	35	2896.47	268.87
Col-0	9	19.0151			Col-0	20	150.09	Col-0	27	815.07	94.9971			Col-0	28	1003.16	Col-0	35	2948.39	277.89
Col-0	9	12.8044			Col-0	20	301.19	Col-0	27	912.308	87.3026			Col-0	28	1100.07	Col-0	35	3597.59	356.788
Col-0	9	13.3242			Col-0	20	181.314	Col-0	27	1085.4	129.155			Col-0	28	1311.59	Col-0	35	3522.46	315.837
Col-0	9	15.13			Col-0	20	200.266	Col-0	27	1140.04	134.254			Col-0	28	1398.3	Col-0	35	3327.15	275.549
Col-0	9	17.4009			Col-0	20	234.053	Col-0	27	1157.67	131.946			Col-0	28	1396.04	Col-0	35	3163.48	252.492
Col-0	9	16.7442			Col-0	20	233.916	Col-0	27	1210.74	139.546			Col-0	28	1511.74	Col-0	35	3116.7	229.281
Col-0	9	14.063			Col-0	20	218.427	Col-0	27	1408.11	169.955			Col-0	28	1741	Col-0	35	3386.31	235.044
Col-0	9	11.71			Col-0	20	181.859	Col-0	27	1280.65	156.97			Col-0	28	1560.34	Col-0	35	3205.21	234.981
Col-0	9	24.2135			Col-0	20	277.111	Col-0	27	1097.83	117.246			Col-0	28	1366.42	Col-0	35	3536.55	310.019
Col-0	9	10.0958			Col-0	20	322.132	Col-0	27	1098.91	110.968			Col-0	28	1362.8	Col-0	35	3144.89	254.584
Col-0	9	9.76746			Col-0	20	288.918	Col-0	27	808.576	74.2369			Col-0	28	1033.45	Col-0	35	3250.42	316.71
Col-0	9	13.762			Col-0	20	254.014	Col-0	27	1301.48	149.638			Col-0	28	1650.7	Col-0	35	3495.93	263.604
Col-0	9	25.9371			Col-0	20	287.8	Col-0	27	1090.81	114.716			Col-0	28	1313.03	Col-0	35	3437.71	303.525
Col-0	9	9.35707			Col-0	20	283.11	Col-0	27	1338.45	150.763			Col-0	28	1634.7	Col-0	35	4035.89	343.027
Col-0	9	16.6621			Col-0	20	183.468	Col-0	27	955.055	110.227			Col-0	28	1169.81	Col-0	35	3346.96	311.021
Col-0	9	17.4829			Col-0	20	276.293	Col-0	27	1387.53	158.748			Col-0	28	1631.69	Col-0	35	2420.92	112.748
35S::PIF4	9	6.86732			Col-0	20	280.819	Col-0	27	1004.16	103.334			Col-0	28	1252.6	Col-0	35	4157.64	415.006
35S::PIF4	9	39.7538			Col-0	20	304.762	Col-0	27	870.583	80.8316			Col-0	28	1063.29	Col-0	35	3679.66	373.766
35S::PIF4	9	7.52396			Col-0	20	185.459	Col-0	27	1079.73	127.753			Col-0	28	1281.42	Col-0	35	3482.11	314.385
35S::PIF4	9	29.3024			Col-0	20	187.853	Col-0	27	1088.67	128.688			Col-0	28	1322.84	Col-0	35	3351.13	289.756
35S::PIF4	9	7.57868			Col-0	20	229.905	Col-0	27	1160.59	132.954			Col-0	28	1414.77	Col-0	35	3204.21	255.634
35S::PIF4	9	9.52122			Col-0	20	251.287	Col-0	27	1184.68	133.341			Col-0	28	1486.15	Col-0	35	3262.32	253.74
35S::PIF4	9	43.2559			Col-0	20	231.926	Col-0	27	1447.5	173.653			Col-0	28	1734.48	Col-0	35	3318.69	226.316
35S::PIF4	9	14.6102			Col-0	20	194.294	Col-0	27	1278.88	154.941			Col-0	28	1571.86	Col-0	35	3256.69	240.689
35S::PIF4	9	6.1286			Col-0	20	281.719	Col-0	27	1076.44	113.532			Col-0	28	1312.53	Col-0	35	3445	304.638
35S::PIF4	9	17.6471			Col-0	20	314.742	Col-0	27	1066.99	107.464			Col-0	28	1334.25	Col-0	35	2993.79	237.077
35S::PIF4	9	7.87963			Col-0	20	275.338	Col-0	27	826.565	78.7467			Col-0	28	1040.74	Col-0	35	3287.17	320.918
35S::PIF4	9	7.25036			Col-0	20	249.576	Col-0	27	1326.79	153.888			Col-0	28	1630.97	Col-0	35	3509.41	268.349
35S::PIF4	9	5.14365			Col-0	20	281.177	Col-0	27	1052.27	110.156			Col-0	28	1216.76	Col-0	35	3543.26	332.357
35S::PIF4	9	9.63066			Col-0	20	269.121	Col-0	27	1369.45	157.19			Col-0	28	1665.18	Col-0	35	4082.7	345.36
35S::PIF4	9	12.6402			Col-0	20	194.31	Col-0	27	973.735	111.346			Col-0	28	1180.2	Col-0	35	3357.32	311.017
35S::PIF4	9	20.1916			Col-0	20	266.639	Col-0	27	1314.88	149.749			Col-0	28	1639.23	Col-0	35	2465.71	118.069
35S::PIF4	9	12.7497			Col-0	20	259.386	Col-0	27	982.324	103.277			Col-0	28	1227.73	Col-0	35	4267.5	434.253
35S::PIF4	9	5.60877			35S::PIF4	20	27.7874	35S::PIF4	27	103.732	10.8492			35S::PIF4	28	198.289	35S::PIF4	35	959.255	108.709
phyb	9	12.7223			35S::PIF4	20	22.8517	35S::PIF4	27	119.786	13.8478			35S::PIF4	28	179.803	35S::PIF4	35	976.498	113.813
phyb	9	9.4665			35S::PIF4	20	34.0321	35S::PIF4	27	287.431	36.1999			35S::PIF4	28	415.092	35S::PIF4	35	1484.35	152.751
phyb	9	11.6827			35S::PIF4	20	30.1326	35S::PIF4	27	256.87	32.391			35S::PIF4	28	362.425	35S::PIF4	35	1471.36	158.42
phyb	9	8.80987			35S::PIF4	20	50.2028	35S::PIF4	27	255.046	29.2633			35S::PIF4	28	371.433	35S::PIF4	35	1596.68	175.035
phyb	9	11.5732			35S::PIF4	20	49.3029	35S::PIF4	27	85.0522	5.10704			35S::PIF4	28	131.419	35S::PIF4	35	830.765	99.9066
phyb	9	9.63066			35S::PIF4	20	29.4781	35S::PIF4	27	303.596	39.1597			35S::PIF4	28	418.823	35S::PIF4	35	959.504	77.2402
phyb	9	12.4214			35S::PIF4	20	17.0979	35S::PIF4	27	235.344	31.1781			35S::PIF4	28	352.561	35S::PIF4	35	1424.42	153.122
phyb	9	12.9138			35S::PIF4	20	49.3575	35S::PIF4	27	267.729	31.196			35S::PIF4	28	367.592	35S::PIF4	35	1524.67	165.296
phyb	9	9.93162			35S::PIF4	20	33.4884	35S::PIF4	27	285.801	36.0446			35S::PIF4	28	465.3	35S::PIF4	35	896.696	61.6279
phyb	9	10.8619			35S::PIF4	20	11.8468	35S::PIF4	27	593.929	83.1546			35S::PIF4	28	685.778	35S::PIF4	35	1224.14	76.9086
phyb	9	9.08347			35S::PIF4	20	65.6089	35S::PIF4	27	360.159	42.0786			35S::PIF4	28	511.888	35S::PIF4	35	846.377	47.7841
phyb	9	11.1081			35S::PIF4	20	31.7415	35S::PIF4	27	396.745	52.1433			35S::PIF4	28	516.254	35S::PIF4	35	1488.39	138.876
phyb	9	12.9138			35S::PIF4	20	40.5767	35S::PIF4	27	364.857	46.3257			35S::PIF4	28	502.604	35S::PIF4	35	1002.94	71.4769
phyb	9	9.4665			35S::PIF4	20	33.3504	35S::PIF4	27	383.592	50.0345			35S::PIF4	28	514.431	35S::PIF4	35	1301.87	112.491
phyb	9	10.7524			35S::PIF4	20	54.4023	35S::PIF4	27	294.892	34.3557			35S::PIF4	28	372.843	35S::PIF4	35	1467.22	156.34
phyb	9	10.2873			35S::PIF4	20	55.7385	35S::PIF4	27	143.025	12.4695			35S::PIF4	28	216.057	35S::PIF4	35	836.982	88.7036
phyb	9	9.76746			35S::PIF4	20	43.1128	35S::PIF4	27	450.213	58.1572			35S::PIF4	28	535.1	35S::PIF4	35	1436.33	128.747
phyb	9	16.1423			35S::PIF4	20	101.306	35S::PIF4	27	343.331	34.5751			35S::PIF4	28	449.439	35S::PIF4	35	1069.73	88.6128
pif3	9	15.5677			35S::PIF4	20	45.3626	35S::PIF4	27	264.717	31.3364			35S::PIF4	28	320.507	35S::PIF4	35	1422.93	157.488
pif3	9	44.7607			35S::PIF4	20	43.0855	35S::PIF4	27	269.888	32.4003			35S::PIF4	28	357.451	35S::PIF4	35	1352.88	142.204
pif3	9	9.02875			35S::PIF4	20	44.0945	35S::PIF4	27	170.215	18.0172			35S::PIF4	28	143.356	35S::PIF4	35	886.693	106.191
pif3	9	13.4063			35S::PIF4	20	19.1158	35S::PIF4	27	277.345	36.8899			35S::PIF4	28	407.797	35S::PIF4	35	939.581	75.9691
pif3	9	15.5404			35S::PIF4	20	15.0753	35S::PIF4	27	250.259	33.5977			35S::PIF4	28	419.956	35S::PIF4	35	1488.75	152.684
pif3	9	9.52122			35S::PIF4	20	45.7306	35S::PIF4	27	235.925	27.1706			35S::PIF4	28	346.205	35S::PIF4	35	1519.2	167.57
pif3	9	16.197			35S::PIF4	20	33.8168	35S::PIF4	27	307.176	39.0512			35S::PIF4	28	432.832	35S::PIF4	35	872.904	62.8674
pif3	9	12.3393			35S::PIF4	20	15.8687	35S::PIF4	27	560.521	77.8075			35S::PIF4	28	655.77	35S::PIF4	35	1251.08	85.0443
pif3	9	7.57868			35S::PIF4	20	49.2477	35S::PIF4	27	380.193	47.2779			35S::PIF4	28	345.984	35S::PIF4	35	858.95	73.2809
pif3	9	9.35707			35S::PIF4	20	33.5685	35S::PIF4	27	350.239	45.2387			35S::PIF4	28	502.162	35S::PIF4	35	1493.55	141.627
pif3	9	46.6759			35S::PIF4	20	37.6862	35S::PIF4	27	375.569	48.269			35S::PIF4	28	283.48	35S::PIF4	35	998.631	102.165
pif3	9	49.5487			35S::PIF4	20	30.1326	35S::PIF4	27	366.67	48.0768			35S::PIF4	28	218.074	35S::PIF4	35	1507.45	184.197
pif3	9	13.4884			35S::PIF4	20	37.6471	35S::PIF4	27	219.209	25.9374			35S::PIF4	28	545.6	35S::PIF4	35	1369.95	117.765
pif3	9	12.093			35S::PIF4	20	47.585	35S::PIF4	27	138.783	13.0284			35S::PIF4	28	473.59	35S::PIF4	35	808.936	47.9065
pif3	9	10.342			35S::PIF4	20	45.567	35S::PIF4	27	364.036	45.4956			35S::PIF4	28	303.043	35S::PIF4	35	1339.86	148.117
pif3	9	14.5281			35S::PIF4	20	113.625	35S::PIF4	27	308.901	27.8966			phyb	28	281.96	phyb	35	482.377	28.631
pif3	9	8.53627			35S::PIF4	20	46.1124	35S::PIF4	27	236.035	27.1318			phyb	28	672.598	phyb	35	772.571	14.282
pif3	9	7.27772			phyb	20	173.978	phyb	27	348.664	24.9552			phyb	28	200.003	phyb	35	1153.84	136.263
pif4	9	16.3338			phyb	20	136.837	phyb	27	584.672	63.9763			phyb	28	786.332	phyb	35	1083.52	42.4551
pif4	9	22.3256			phyb	20	112.268	phyb	27	560.853	64.0836			phyb	28	764.586	phyb	35	975.448	30.1232
pif4	9	NaN			phyb	20	127.075	phyb	27	747.122	88.5782			phyb	28	543.583	phyb	35	486.715	-8.1239
pif4	9	8.29003			phyb	20	176.596	phyb	27	709.294	76.0996			phyb	28	553.641	phyb	35	879.674	46.5762
pif4	9	8.94667			phyb	20	131.957	phyb	27	592.823	65.8381			phyb	28	784.039	phyb	35	1045.55	37.3589
pif4	9	35.4036			phyb	20	161.806	phyb	27	533.524	53.1026			phyb	28	528.053	phyb	35	462.316	-9.39103
pif4	9	12.695			phyb	20	155.869	phyb	27	729.686	81.9739			phyb	28	656.82	phyb	35	1378.49	103.096
pif4	9	10.2052			phyb	20	148.836	phyb	27	628.027	68.4559			phyb	28	783.818	phyb	35	924.107	20.0413
pif4	9	19.9453			phyb	20	190.64	phyb	27	561.378	52.9626			phyb	28	665.552	phyb	35	672.294	0.963183
pif4	9	9.24763			phyb	20	144.5	phyb	27	678.235	76.2478			phyb	28	586.496	phyb	35	865.223	39.8181
pif4	9	11.1355			phyb	20	152.599	phyb	27	595.144	63.2208			phyb	28	749.112	phyb	35	911.341	23.1756
pif4	9	11.7374			phyb	20	184.395	phyb	27	610.342	60.8496			phyb	28	597.41	phyb	35	889.207	41.6853
pif4	9	9.98634			phyb	20	176.869	phyb	27	684.894	72.5751			phyb	28	675.306	phyb	35	592.851	-11.7793
pif4	9	21.8879			phyb	20	134.683	phyb	27	598.985	66.3289			phyb	28	775.722	phyb	35	482.515	-41.8866
pif4	9	20.2463			phyb	20	140.164	phyb	27	601.776	65.9445			phyb	28	296.274	phyb	35	779.424	69.0215
pif4	9	9.22027			phyb	20	148.181	phyb	27	733.61	83.6327			phyb	28	656.378	phyb	35	945.301	41.2748
pif4	9	15.3489			phyb	20	127.457	phyb	27	254.917	18.2086			phyb	28	278.478	phyb	35	878.376	85.6996
pif4	9	8.75515			phyb	20	4.33582	phyb	27	567.899	80.509			phyb	28	781.635	phyb	35	886.638	15.0004
pif7-1	9	18.8509			phyb	20	129.066	phyb	27	531.065	57.4285			phyb	28	560.134	phyb	35	947.235	55.3001
pif7-1	9	10.0411			phyb	20	103.896	phyb	27	734.255	90.0512			phyb	28	561.405	phyb	35	486.439	-10.7095
pif7-1	9	15.5951			phyb	20	120.383	phyb	27	729.764	87.0543			phyb	28	558.919	phyb	35	847.621	41.2432
pif7-1	9	8.53627			phyb	20	156.662	phyb	27	604.761	64.014			phyb	28	748.863	phyb	35	994.017	35.022
pif7-1	9	12.4214			phyb	20	113.27	phyb	27	574.512	65.8918			phyb	28	661.49	phyb	35	457.591	-29.1284
pif7-1	9	12.2572			phyb	20	144.515	phyb	27	722.723	82.6012			phyb	28	780.447	phyb	35	1237.04	65.228
pif7-1	9	14.8838			phyb	20	146.758	phyb	27	568.635	60.2681			phyb	28	684.038	phyb	35	872.739	26.9573
pif7-1	9	11.1355			phyb	20	136.019	phyb	27	570.77	62.1072			phyb	28	612.47	phyb	35	717.749	15.0399
pif7-1	9	15.0479			phyb	20	167.87	phyb	27	683.244	73.6248			phyb	28	814.407	phyb	35	916.95	14.6491
pif7-1	9	14.7743			phyb	20	141.8	phyb	27	608.363	66.6518			phyb	28	632.724	phyb	35	901.062	38.3339
pif7-1	9	11.4091			phyb	20	116.195	phyb	27	621.036	72.1202			phyb	28	663.894	phyb	35	843.587	25.6704
pif7-1	9	7.30508			phyb	20	171.988	phyb	27	684.038	73.15			phyb	28	744.58	phyb	35	570.552	-24.8612
pif7-1	9	10.9439			phyb	20	172.011	phyb	27	625.872	64.8372			pif3	28	604.871	pif3	35	1689	154.875
pif7-1	9	5.60877			phyb	20	96.9152	phyb	27	613.824	73.8441			pif3	28	583.539	pif3	35	2006.27	203.247
pif7-1	9	11.1355			phyb	20	114.967	phyb	27	753.091	91.1605			pif3	28	755.909	pif3	35	2235.78	211.411
pif7-1	9	10.342			pif3	20	91.9794	pif3	27	464.748	53.2526			pif3	28	733.444	pif3	35	1111.65	54.029
pif7-1	9	4.97949			pif3	20	167.325	pif3	27	468.948	43.089			pif3	28	1038.92	pif3	35	1105.18	9.46604
pif7-1	9	26.457			pif3	20	199.257	pif3	27	634.134	62.1253			pif3	28	774.506	pif3	35	2236.01	208.786
pif7-2	9	11.5459			pif3	20	171.497	pif3	27	613.409	63.1304			pif3	28	607.358	pif3	35	2240.95	233.371
pif7-2	9	9.95898			pif3	20	282.292	pif3	27	839.331	79.577			pif3	28	979.261	pif3	35	1679.21	99.9934
pif7-2	9	8.83723			pif3	20	164.734	pif3	27	641.125	68.0558			pif3	28	799.734	pif3	35	2464.83	237.871
pif7-2	9	8.20795			pif3	20	161.789	pif3	27	462.813	43.0035			pif3	28	1205.29	pif3	35	1415.55	30.0363
pif7-2	9	24.2955			pif3	20	179.187	pif3	27	799.126	88.5628			pif3	28	985.534	pif3	35	2670.69	240.737
pif7-2	9	7.60604			pif3	20	190.34	pif3	27	657.842	66.786			pif3	28	915.209	pif3	35	1896.57	140.194
pif7-2	9	4.65117			pif3	20	136.756	pif3	27	1004.57	123.974			pif3	28	855.358	pif3	35	2650.57	256.459
pif7-2	9	7.46924			pif3	20	164.27	pif3	27	818.413	93.449			pif3	28	821.785	pif3	35	1347.32	75.077
pif7-2	9	11.1628			pif3	20	160.371	pif3	27	753.146	84.6822			pif3	28	764.144	pif3	35	1393.64	89.9273
pif7-2	9	8.59099			pif3	20	166.616	pif3	27	703.435	76.6886			pif3	28	989.236	pif3	35	2018.54	147.043
pif7-2	9	12.3666			pif3	20	170.972	pif3	27	633.084	66.016			pif3	28	806.78	pif3	35	1477.8	95.8604
pif7-2	9	35.7593			pif3	20	186.512	pif3	27	656.046	67.0763			pif3	28	756.075	pif3	35	2986.58	318.644
pif7-2	9	9.98634			pif3	20	173.79	pif3	27	833.611	94.2602			pif3	28	738.39	pif3	35	1729.73	141.619
pif7-2	9	9.27499			pif3	20	96.6152	pif3	27	678.677	83.1517			pif3	28	980.007	pif3	35	2412.44	204.633
pif7-2	9	11.5185			pif3	20	168.224	pif3	27	643.335	67.873			pif3	28	1022.26	pif3	35	1691.1	95.5485
pif7-2	9	9.11083			pif3	20	203.092	pif3	27	603.517	57.2036			pif3	28	780.336	pif3	35	1966.87	169.504
pif7-2	9	12.5034			pif3	20	161.843	pif3	27	813.688	93.1207			pif3	28	573.398	pif3	35	2217.93	234.934
pif3pif7	9	10.8345			pif3	20	273.32	pif3	27	779.701	72.34			pif3	28	934.856	pif3	35	1606.6	95.963
pif3pif7	9	9.6033			pif3	20	134.22	pif3	27	627.032	70.4018			pif3	28	773.649	pif3	35	2437.17	237.646
pif3pif7	9	13.4337			pif3	20	138.419	pif3	27	461.708	46.1842			pif3	28	1217.48	pif3	35	1450.92	33.3482
pif3pif7	9	7.52396			pif3	20	168.252	pif3	27	762.56	84.9012			pif3	28	976.636	pif3	35	2774.59	256.85
pif3pif7	9	14.3913			pif3	20	179.535	pif3	27	662.756	69.0315			pif3	28	921.731	pif3	35	1842.41	131.526
pif3pif7	9	9.08347			pif3	20	124.87	pif3	27	948.617	117.678			pif3	28	837.811	pif3	35	2710.87	267.579
pif3pif7	9	12.2025			pif3	20	171.088	pif3	27	778.208	86.7315			pif3	28	790.173	pif3	35	1353.15	80.4258
pif3pif7	9	11.6827			pif3	20	145.645	pif3	27	723.469	82.5462			pif3	28	985.174	pif3	35	1381.34	56.5949
pif3pif7	9	12.777			pif3	20	172.777	pif3	27	653.863	68.7265			pif3	28	757.263	pif3	35	2008.62	178.765
pif3pif7	9	9.13819			pif3	20	151.617	pif3	27	644.431	70.4019			pif3	28	791.085	pif3	35	1468.79	96.8157
pif3pif7	9	11.6553			pif3	20	179.596	pif3	27	649.635	67.1485			pif3	28	733.942	pif3	35	3048.95	330.715
pif3pif7	9	6.89468			pif3	20	163.316	pif3	27	783.431	88.5879			pif3	28	987.109	pif3	35	1741.17	107.723
pif3pif7	9	6.37484			pif3	20	119.576	pif3	27	626.783	72.4582			pif4	28	1203.64	pif4	35	3929.2	389.367
pif3pif7	9	12.6402			pif3	20	103.051	pif3	27	664.778	80.2467			pif4	28	1433.87	pif4	35	3305.62	267.394
pif3pif7	9	15.2394			pif3	20	128.548	pif3	27	580.941	64.6277			pif4	28	1259.67	pif4	35	3577.94	331.181
pif3pif7	9	14.446			pif3	20	127.702	pif3	27	775.279	92.511			pif4	28	1290.79	pif4	35	4159.96	409.882
pif3pif7	9	11.9836			pif4	20	184.559	pif4	27	976.995	113.205			pif4	28	1600.55	pif4	35	3198.63	228.298
pif3pif7	9	37.5924			pif4	20	198.166	pif4	27	1112.67	130.643			pif4	28	1251.66	pif4	35	2917.75	238.013
pifq	9	7.44188			pif4	20	215.128	pif4	27	1002.25	112.446			pif4	28	1514.17	pif4	35	3057.85	220.525
pifq	9	20.6293			pif4	20	172.915	pif4	27	1091.72	131.258			pif4	28	1005.76	pif4	35	3913.45	415.385
pifq	9	4.1587			pif4	20	225.217	pif4	27	1303.64	154.06			pif4	28	947.069	pif4	35	4003.81	436.677
pifq	9	10.2599			pif4	20	224.59	pif4	27	991.613	109.575			pif4	28	1076.58	pif4	35	3439.48	337.556
pifq	9	24.0219			pif4	20	169.915	pif4	27	1233.75	151.977			pif4	28	717.086	pif4	35	3595.16	411.153
pifq	9	12.8591			pif4	20	250.878	pif4	27	825.819	82.1345			pif4	28	1073.38	pif4	35	2576.19	214.687
pifq	9	NaN			pif4	20	196.69	pif4	27	800.839	86.3071			pif4	28	1161.41	pif4	35	2712	221.512
pifq	9	7.41452			pif4	20	171.17	pif4	27	891.75	102.94			pif4	28	1197.09	pif4	35	1941.17	106.298
pifq	9	8.56363			pif4	20	159.689	pif4	27	571.132	58.7776			pif4	28	1302.95	pif4	35	2904.38	228.776
pifq	9	7.96171			pif4	20	158.544	pif4	27	888.13	104.227			pif4	28	1143.59	pif4	35	3123.36	282.824
pifq	9	7.79755			pif4	20	152.108	pif4	27	929.274	111.024			pif4	28	1077.49	pif4	35	3881.37	400.554
pifq	9	6.37484			pif4	20	173.924	pif4	27	969.617	113.671			pif4	28	1368.63	pif4	35	3183.71	259.298
pifq	9	9.63066			pif4	20	88.2435	pif4	27	1047.51	137.038			pif4	28	1169.76	pif4	35	3404.93	319.311
pifq	9	10.4241			pif4	20	214.2	pif4	27	922.781	101.226			pif4	28	1433.56	pif4	35	4082.56	378.428
pifq	9	13.1327			pif4	20	210.601	pif4	27	902.581	98.8544			pif4	28	1269.95	pif4	35	3106.48	262.361
pifq	9	11.8468			pif4	20	281.556	pif4	27	1106.48	117.846			pif4	28	1311.76	pif4	35	2885.64	224.84
pifq	9	9.52122			pif4	20	198.821	pif4	27	995.077	113.751			pif4	28	1630.83	pif4	35	3265.2	233.481
pifq	9	6.89468			pif4	20	214.282	pif4	27	1164.51	135.747			pif4	28	1229.06	pif4	35	3180.48	278.774
Col-0	10	23.2285			pif4	20	224.726	pif4	27	1005.04	111.474			pif4	28	1493.19	pif4	35	3093.49	228.614
Col-0	10	33.2696			pif4	20	173.596	pif4	27	1113.23	134.234			pif4	28	986.473	pif4	35	4031.55	435.011
Col-0	10	34.2272			pif4	20	234.009	pif4	27	1361.55	161.078			pif4	28	927.506	pif4	35	4085.44	451.133
Col-0	10	22.7907			pif4	20	226.539	pif4	27	962.405	105.124			pif4	28	1100.15	pif4	35	3620.02	359.982
Col-0	10	20.5199			pif4	20	183.168	pif4	27	1197.39	144.889			pif4	28	722.17	pif4	35	3625.25	414.725
Col-0	10	14.5828			pif4	20	254.914	pif4	27	810.771	79.4083			pif4	28	1064.59	pif4	35	2679.26	230.667
Col-0	10	28.7552			pif4	20	209.85	pif4	27	739.523	75.6676			pif4	28	1186.64	pif4	35	2755.47	224.118
Col-0	10	28.1806			pif4	20	183.721	pif4	27	896.309	101.798			pif4	28	1137.12	pif4	35	1985.41	121.183
Col-0	10	22.8728			pif4	20	168.47	pif4	27	597.466	61.2851			pif4	28	1095.87	pif4	35	2932.75	262.412
Col-0	10	16.9357			pif4	20	175.723	pif4	27	875.861	100.02			pif4	28	1345.14	pif4	35	3121.95	253.83
Col-0	10	37.6471			pif4	20	168.318	pif4	27	908.771	105.779			pif7-1	28	937.039	pif7-1	35	2434.1	213.866
Col-0	10	18.0849			pif4	20	183.119	pif4	27	989.449	115.19			pif7-1	28	1605.05	pif7-1	35	2428.05	117.571
Col-0	10	17.9481			pif4	20	96.0057	pif4	27	1078.3	140.328			pif7-1	28	1285.32	pif7-1	35	2630.21	192.127
Col-0	10	25.1711			pif4	20	226.09	pif4	27	941.266	102.168			pif7-1	28	986.003	pif7-1	35	2589.89	229.127
Col-0	10	16.8537			pif4	20	226.008	pif4	27	930.149	100.591			pif7-1	28	1240.88	pif7-1	35	2980.09	248.458
Col-0	10	22.2162			pif4	20	283.001	pif4	27	1100.32	116.76			pif7-1	28	929.523	pif7-1	35	1766.78	119.608
Col-0	10	24.2682			pif7-1	20	156.253	pif7-1	27	784.785	89.7903			pif7-1	28	1193.33	pif7-1	35	1795.05	85.9601
35S::PIF4	10	9.95898			pif7-1	20	193.394	pif7-1	27	1373.97	168.654			pif7-1	28	899.459	pif7-1	35	2949.39	292.847
35S::PIF4	10	43.4474			pif7-1	20	192.494	pif7-1	27	1022.37	118.553			pif7-1	28	963.151	pif7-1	35	2318.99	193.691
35S::PIF4	10	11.4091			pif7-1	20	139.619	pif7-1	27	787.244	92.5179			pif7-1	28	1015.04	pif7-1	35	2346.56	190.217
35S::PIF4	10	23.6389			pif7-1	20	201.847	pif7-1	27	1025.41	117.651			pif7-1	28	1157.52	pif7-1	35	2244.79	155.325
35S::PIF4	10	13.7346			pif7-1	20	187.94	pif7-1	27	746.376	79.7766			pif7-1	28	1263.32	pif7-1	35	2393.92	161.515
35S::PIF4	10	18.55			pif7-1	20	183.831	pif7-1	27	986.528	114.671			pif7-1	28	1120.3	pif7-1	35	2990.12	267.118
35S::PIF4	10	34.2272			pif7-1	20	207.083	pif7-1	27	791.665	83.5117			pif7-1	28	1141.3	pif7-1	35	2117.05	139.393
35S::PIF4	10	24.2682			pif7-1	20	153.09	pif7-1	27	797.745	92.0935			pif7-1	28	857.983	pif7-1	35	3564.76	386.682
35S::PIF4	10	9.54858			pif7-1	20	189.549	pif7-1	27	803.492	87.7061			pif7-1	28	953.453	pif7-1	35	2715.18	251.675
35S::PIF4	10	32.996			pif7-1	20	158.735	pif7-1	27	872.103	101.91			pif7-1	28	1664.51	pif7-1	35	2881.28	173.823
35S::PIF4	10	14.0082			pif7-1	20	153.744	pif7-1	27	1004.41	121.523			pif7-1	28	1363.29	pif7-1	35	2882.52	217.032
35S::PIF4	10	22.4351			pif7-1	20	162.225	pif7-1	27	908.909	106.669			pif7-1	28	1034.91	pif7-1	35	2731.4	242.355
35S::PIF4	10	8.23531			pif7-1	20	155.978	pif7-1	27	934.58	111.229			pif7-1	28	1295.9	pif7-1	35	2644.96	192.723
35S::PIF4	10	12.1478			pif7-1	20	326.605	pif7-1	27	745.16	59.7937			pif7-1	28	960.72	pif7-1	35	2353.69	198.996
35S::PIF4	10	18.7962			pif7-1	20	174.687	pif7-1	27	827.932	93.3207			pif7-1	28	1229.64	pif7-1	35	2388.76	165.589
35S::PIF4	10	31.0808			pif7-1	20	220.636	pif7-1	27	1456.45	176.545			pif7-1	28	930.076	pif7-1	35	2601.83	238.822
35S::PIF4	10	20.2736			pif7-1	20	213.41	pif7-1	27	1081.69	124.041			pif7-1	28	990.231	pif7-1	35	2547.97	222.535
35S::PIF4	10	10.6703			pif7-1	20	151.072	pif7-1	27	860.249	101.311			pif7-1	28	1041.1	pif7-1	35	2928	269.557
phyb	10	27.1957			pif7-1	20	219.382	pif7-1	27	1097.09	125.386			pif7-1	28	1203.08	pif7-1	35	2383.31	168.604
phyb	10	16.5527			pif7-1	20	204.438	pif7-1	27	811.659	86.7458			pif7-1	28	1165.97	pif7-1	35	2493.68	189.672
phyb	10	14.8564			pif7-1	20	203.694	pif7-1	27	1042.37	119.811			pif7-1	28	1176	pif7-1	35	3054.14	268.306
phyb	10	14.6922			pif7-1	20	229.689	pif7-1	27	830.793	85.8719			pif7-1	28	871.302	pif7-1	35	2210.75	191.35
phyb	10	14.5007			pif7-1	20	165.334	pif7-1	27	831.898	95.2235			pif7-1	28	1354.18	pif7-1	35	3640.91	326.677
phyb	10	15.513			pif7-1	20	200.348	pif7-1	27	870.114	95.6808			pif7-1	28	1395.93	pif7-1	35	2759.09	194.737
phyb	10	16.0876			pif7-1	20	174.033	pif7-1	27	964.091	112.865			pif7-1	28	847.234	pif7-1	35	2891.89	292.093
phyb	10	18.249			pif7-1	20	169.905	pif7-1	27	1090.17	131.466			pif7-1	28	885.063	pif7-1	35	3035.16	307.157
phyb	10	13.6252			pif7-1	20	187.422	pif7-1	27	975.033	112.516			pif7-1	28	696.306	pif7-1	35	2825.84	304.22
phyb	10	16.6348			pif7-1	20	171.251	pif7-1	27	1004.23	118.996			pif7-1	28	722.198	pif7-1	35	2791.75	295.65
phyb	10	13.5705			pif7-1	20	345.53	pif7-1	27	785.421	62.8416			pif7-2	28	944.831	pif7-2	35	3295.65	335.831
phyb	10	22.7634			pif7-1	20	248.969	pif7-1	27	1174.59	132.232			pif7-2	28	1099.32	pif7-2	35	2935.77	262.349
phyb	10	16.0055			pif7-1	20	271.193	pif7-1	27	1238.07	138.125			pif7-2	28	926.456	pif7-2	35	3627.57	385.873
phyb	10	14.446			pif7-1	20	104.196	pif7-1	27	666.712	80.3594			pif7-2	28	990.452	pif7-2	35	3475.56	355.016
phyb	10	15.7319			pif7-1	20	120.885	pif7-1	27	720.54	85.665			pif7-2	28	1203.03	pif7-2	35	2650.6	206.796
phyb	10	12.394			pif7-1	20	103.569	pif7-1	27	577.018	67.6355			pif7-2	28	1128.95	pif7-2	35	2607.77	211.261
phyb	10	38.9604			pif7-1	20	109.241	pif7-1	27	621.92	73.2399			pif7-2	28	996.448	pif7-2	35	3231.04	319.228
phyb	10	17.5377			pif7-2	20	178.205	pif7-2	27	744.276	80.8673			pif7-2	28	1116.57	pif7-2	35	3313.33	313.824
pif3	10	26.8947			pif7-2	20	127.32	pif7-2	27	859.751	104.633			pif7-2	28	1093.38	pif7-2	35	3273.99	311.515
pif3	10	44.3229			pif7-2	20	148.972	pif7-2	27	736.18	83.8868			pif7-2	28	1277.05	pif7-2	35	3290.98	287.704
pif3	10	14.0903			pif7-2	20	130.347	pif7-2	27	775.998	92.2358			pif7-2	28	917.42	pif7-2	35	2788.9	267.354
pif3	10	19.8632			pif7-2	20	148.645	pif7-2	27	948.202	114.222			pif7-2	28	1053.26	pif7-2	35	2766.27	244.716
pif3	10	13.3242			pif7-2	20	136.565	pif7-2	27	899.736	109.024			pif7-2	28	1031.4	pif7-2	35	2828.97	256.795
pif3	10	15.5677			pif7-2	20	135.883	pif7-2	27	830.039	99.1652			pif7-2	28	1311.79	pif7-2	35	3500.76	312.711
pif3	10	20.8208			pif7-2	20	161.053	pif7-2	27	883.515	103.209			pif7-2	28	950.579	pif7-2	35	2747.56	256.712
pif3	10	17.7839			pif7-2	20	201.575	pif7-2	27	786.885	83.6157			pif7-2	28	1079.26	pif7-2	35	3630.58	364.474
pif3	10	12.8318			pif7-2	20	155.517	pif7-2	27	1003.94	121.203			pif7-2	28	988.988	pif7-2	35	3992.56	429.082
pif3	10	13.0506			pif7-2	20	137.901	pif7-2	27	742.812	86.4158			pif7-2	28	1130.38	pif7-2	35	3156.96	289.512
pif3	10	48.9741			pif7-2	20	164.707	pif7-2	27	808.217	91.9301			pif7-2	28	942.234	pif7-2	35	2839.27	271.006
pif3	10	51.8743			pif7-2	20	171.715	pif7-2	27	847.731	96.5738			pif7-2	28	1018.11	pif7-2	35	3514.19	356.583
pif3	10	14.9932			pif7-2	20	138.195	pif7-2	27	1078.77	134.367			pif7-2	28	1238.31	pif7-2	35	3393.27	307.851
pif3	10	18.3311			pif7-2	20	142.128	pif7-2	27	756.047	87.7028			pif7-2	28	1177.08	pif7-2	35	2551.21	196.304
pif3	10	13.1327			pif7-2	20	172.124	pif7-2	27	857.43	97.9009			pif7-2	28	1054.14	pif7-2	35	2525.4	210.179
pif3	10	19.8632			pif7-2	20	200.02	pif7-2	27	814.736	87.8165			pif7-2	28	1179.15	pif7-2	35	3172.41	284.751
pif3	10	12.3393			pif7-2	20	145.1	pif7-2	27	923.911	111.259			pif7-2	28	1071.83	pif7-2	35	3359.15	326.76
pif3	10	10.4515			pif7-2	20	164.898	pif7-2	27	794.803	89.9865			pif7-2	28	1318.64	pif7-2	35	3437.68	302.72
pif4	10	24.8975			pif7-2	20	144.173	pif7-2	27	857.264	101.87			pif7-2	28	958.067	pif7-2	35	2921.18	280.444
pif4	10	13.9535			pif7-2	20	164.216	pif7-2	27	1026.88	123.237			pif7-2	28	1092.75	pif7-2	35	2799.82	243.867
pif4	10	18.1669			pif7-2	20	151.072	pif7-2	27	967.021	116.564			pif7-2	28	1388.33	pif7-2	35	3024.91	233.797
pif4	10	14.829			pif7-2	20	156.117	pif7-2	27	885.403	104.184			pif7-2	28	987.192	pif7-2	35	3594.46	372.468
pif4	10	15.0753			pif7-2	20	176.078	pif7-2	27	959.393	111.902			pif7-2	28	1119.14	pif7-2	35	2830.27	244.447
pif4	10	28.7552			pif7-2	20	222.599	pif7-2	27	860.47	91.1243			pif7-2	28	1357.38	pif7-2	35	3686.76	332.768
pif4	10	19.2613			pif7-2	20	170.27	pif7-2	27	1070.46	128.598			pif7-2	28	1422.81	pif7-2	35	4203.04	397.175
pif4	10	14.5554			pif7-2	20	153.581	pif7-2	27	801.143	92.5089			pif3pif7	28	1535.64	pif3pif7	35	2744.22	172.655
pif4	10	21.0397			pif7-2	20	180.905	pif7-2	27	878.624	99.6742			pif3pif7	28	1168.57	pif3pif7	35	2535.93	195.337
pif4	10	14.446			pif7-2	20	192.093	pif7-2	27	906.75	102.094			pif3pif7	28	1546.44	pif3pif7	35	3222.09	239.379
pif4	10	17.4829			pif7-2	20	149.109	pif7-2	27	1137.66	141.221			pif3pif7	28	1251.66	pif3pif7	35	3678.55	346.699
pif4	10	18.0028			pif7-2	20	159.389	pif7-2	27	828.499	95.5872			pif3pif7	28	1478.22	pif3pif7	35	3216.04	248.26
pif4	10	15.4036			pif7-2	20	190.967	pif7-2	27	913.662	103.242			pif3pif7	28	1175.12	pif3pif7	35	2840.93	237.973
pif4	10	32.5035			pif7-2	20	187.204	pif7-2	27	1044.22	122.432			pif3pif7	28	1050.61	pif3pif7	35	2625.73	225.018
pif4	10	31.1629			pif7-2	20	203.02	pif7-2	27	1129.86	132.405			pif3pif7	28	1213.03	pif3pif7	35	3121.54	272.644
pif4	10	12.8591			pif3pif7	20	218.345	pif3pif7	27	1255.92	148.224			pif3pif7	28	1084.35	pif3pif7	35	2769.72	240.768
pif4	10	24.4597			pif3pif7	20	308.716	pif3pif7	27	953.563	92.121			pif3pif7	28	1225	pif3pif7	35	2806.86	225.981
pif4	10	16.0055			pif3pif7	20	204.22	pif3pif7	27	1271.11	152.413			pif3pif7	28	1104.74	pif3pif7	35	2497.93	199.028
pif7-1	10	23.3106			pif3pif7	20	146.791	pif3pif7	27	1016.7	124.273			pif3pif7	28	1121.6	pif3pif7	35	3124.38	286.113
pif7-1	10	11.2996			pif3pif7	20	127.239	pif3pif7	27	1329.17	171.704			pif3pif7	28	1324.89	pif3pif7	35	3308.58	283.385
pif7-1	10	18.5226			pif3pif7	20	261.158	pif3pif7	27	1006.26	106.443			pif3pif7	28	1082.83	pif3pif7	35	2946.57	266.249
pif7-1	10	11.9836			pif3pif7	20	220.821	pif3pif7	27	891.307	95.7837			pif3pif7	28	1097.33	pif3pif7	35	2676.8	225.637
pif7-1	10	15.5677			pif3pif7	20	179.563	pif3pif7	27	998.604	117.006			pif3pif7	28	870.031	pif3pif7	35	2316.22	206.599
pif7-1	10	16.7442			pif3pif7	20	267.648	pif3pif7	27	863.841	85.1704			pif3pif7	28	1126.6	pif3pif7	35	2346.37	174.253
pif7-1	10	24.6239			pif3pif7	20	160.589	pif3pif7	27	1013.44	121.836			pif3pif7	28	920.846	pif3pif7	35	2873.7	278.98
pif7-1	10	17.9481			pif3pif7	20	198.957	pif3pif7	27	889.29	98.6191			pif3pif7	28	1576.81	pif3pif7	35	2624.6	149.684
pif7-1	10	23.037			pif3pif7	20	174.824	pif3pif7	27	913.717	105.556			pif3pif7	28	1201.45	pif3pif7	35	2537.25	190.829
pif7-1	10	18.1669			pif3pif7	20	154.508	pif3pif7	27	1062.9	129.771			pif3pif7	28	1574.71	pif3pif7	35	3182.22	229.644
pif7-1	10	17.2367			pif3pif7	20	116.849	pif3pif7	27	903.908	112.437			pif3pif7	28	1297.42	pif3pif7	35	3691.32	341.985
pif7-1	10	14.0903			pif3pif7	20	182.868	pif3pif7	27	860.857	96.8555			pif3pif7	28	1519.09	pif3pif7	35	3092.88	224.828
pif7-1	10	13.9809			pif3pif7	20	204.002	pif3pif7	27	745.823	77.4031			pif3pif7	28	1197.09	pif3pif7	35	2797.85	228.681
pif7-1	10	16.5527			pif3pif7	20	155.381	pif3pif7	27	911.396	108.002			pif3pif7	28	1087.25	pif3pif7	35	2536.01	206.966
pif7-1	10	19.8359			pif3pif7	20	154.263	pif3pif7	27	740.214	83.7074			pif3pif7	28	1259.54	pif3pif7	35	3047.54	255.429
pif7-1	10	20.5746			pif3pif7	20	239.506	pif3pif7	27	1348.08	158.368			pif3pif7	28	1111.23	pif3pif7	35	2793.98	240.393
pif7-1	10	11.9836			pif3pif7	20	327.232	pif3pif7	27	1004.67	96.7767			pif3pif7	28	1242.13	pif3pif7	35	2899.6	236.781
pif7-1	10	38.0302			pif3pif7	20	219.927	pif3pif7	27	1358.04	162.588			pif3pif7	28	1135.85	pif3pif7	35	2510.89	196.434
pif7-2	10	16.9905			pif3pif7	20	166.07	pif3pif7	27	1101.09	133.575			pif3pif7	28	1161.5	pif3pif7	35	3226.62	295.018
pif7-2	10	13.0233			pif3pif7	20	141.037	pif3pif7	27	1391.34	178.615			pif3pif7	28	1367.25	pif3pif7	35	3343.56	282.331
pif7-2	10	12.1478			pif3pif7	20	292.327	pif3pif7	27	1055.94	109.088			pif3pif7	28	1130.6	pif3pif7	35	3027.51	270.986
pif7-2	10	12.394			pif3pif7	20	238.359	pif3pif7	27	929.816	98.7796			pif3pif7	28	1151.08	pif3pif7	35	2782.49	233.059
pif7-2	10	42.2983			pif3pif7	20	197.128	pif3pif7	27	1066.61	124.211			pif3pif7	28	888.102	pif3pif7	35	2455.74	223.948
pif7-2	10	10.4788			pif3pif7	20	287.664	pif3pif7	27	937.951	92.8981			pif3pif7	28	1149.14	pif3pif7	35	2384.2	176.436
pif7-2	10	13.7346			pif3pif7	20	177.196	pif3pif7	27	1073.93	128.105			pif3pif7	28	940.714	pif3pif7	35	2984.07	291.908
pif7-2	10	13.1327			pif3pif7	20	216.546	pif3pif7	27	934.884	102.62			pifq	28	777.794	pifq	35	2983.68	315.127
pif7-2	10	15.7045			pif3pif7	20	189.658	pif3pif7	27	981.251	113.085			pifq	28	797.109	pifq	35	2857.12	294.288
pif7-2	10	11.3817			pif3pif7	20	168.906	pif3pif7	27	1145.84	139.562			pifq	28	1108	pifq	35	2439.35	190.193
pif7-2	10	12.5582			pif3pif7	20	135.365	pif3pif7	27	958.898	117.648			pifq	28	886.859	pifq	35	2664.47	253.945
pif7-2	10	48.0986			pif3pif7	20	202.299	pif3pif7	27	930.842	104.078			pifq	28	942.206	pifq	35	2959.7	288.213
pif7-2	10	14.5554			pif3pif7	20	222.983	pif3pif7	27	794.886	81.7005			pifq	28	632.338	pifq	35	2706.09	296.25
pif7-2	10	12.5308			pif3pif7	20	167.415	pif3pif7	27	964.423	113.858			pifq	28	791.113	pifq	35	2204.97	201.98
pif7-2	10	17.5924			pif3pif7	20	171.218	pif3pif7	27	800.287	89.867			pifq	28	828.057	pifq	35	2347.86	217.115
pif7-2	10	11.4364			pifq	20	168.961	pifq	27	617.748	64.1124			pifq	28	1059.09	pifq	35	2711.89	236.114
pif7-2	10	19.8632			pifq	20	193.939	pifq	27	628.58	62.0915			pifq	28	777.601	pifq	35	2269.83	213.175
pif3pif7	10	16.0329			pifq	20	85.2712	pifq	27	893.988	115.531			pifq	28	816.921	pifq	35	2848.12	290.171
pif3pif7	10	13.762			pifq	20	94.8972	pifq	27	708.382	87.6406			pifq	28	938.172	pifq	35	3000.18	294.572
pif3pif7	10	16.9905			pifq	20	200.075	pifq	27	756.075	79.4286			pifq	28	900.924	pifq	35	2799.87	271.278
pif3pif7	10	11.1628			pifq	20	137.983	pifq	27	489.291	50.1868			pifq	28	982.936	pifq	35	2174.03	170.156
pif3pif7	10	16.9357			pifq	20	137.656	pifq	27	603.456	66.5429			pifq	28	722.115	pifq	35	2534.66	258.934
pif3pif7	10	13.2422			pifq	20	175.587	pifq	27	678.614	71.861			pifq	28	737.976	pifq	35	2463.86	246.555
pif3pif7	10	20.3284			pifq	20	109.05	pifq	27	866.107	108.151			pifq	28	1070.95	pifq	35	2033.13	137.455
pif3pif7	10	15.9508			pifq	20	183.25	pifq	27	609.845	60.9422			pifq	28	911.479	pifq	35	2512.61	228.732
pif3pif7	10	17.3461			pifq	20	115.213	pifq	27	652.454	76.7487			pifq	28	992.552	pifq	35	2900.04	272.498
pif3pif7	10	17.6471			pifq	20	126.202	pifq	27	786.388	94.3122			pifq	28	1117.92	pifq	35	2849.36	247.349
pif3pif7	10	13.379			pifq	20	106.841	pifq	27	708.686	85.9778			pifq	28	882.134	pifq	35	2405.25	217.589
pif3pif7	10	5.30781			pifq	20	112.431	pifq	27	786.83	96.3426			pifq	28	947.373	pifq	35	2548.08	228.673
pif3pif7	10	10.5335			pifq	20	157.998	pifq	27	577.736	59.9625			pifq	28	621.561	pifq	35	2910.59	327.005
pif3pif7	10	16.7989			pifq	20	163.667	pifq	27	588.347	60.6686			pifq	28	789.731	pifq	35	2623.8	262.009
pif3pif7	10	24.9248			pifq	20	80.7445	pifq	27	876.773	113.718			pifq	28	844.139	pifq	35	2067.97	174.834
pif3pif7	10	15.4036			pifq	20	129.284	pifq	27	739.661	87.1968			pifq	28	1068.32	pifq	35	2247.47	168.45
pif3pif7	10	13.6526			pifq	20	133.347	pifq	27	790.615	93.8955			pifq	28	784.619	pifq	35	2589.56	257.849
pif3pif7	10	28.509			pifq	20	178.778	pifq	27	934.667	107.984			pifq	28	815.623	pifq	35	2887.41	295.97
pifq	10	13.1327			pifq	20	212.646	pifq	27	726.37	73.3892			pifq	28	943.533	pifq	35	2943.59	285.722
pifq	10	31.1355			pifq	20	87.9163	pifq	27	760.441	96.0749			pifq	28	914.325	pifq	35	2837.59	274.752
pifq	10	10.5609			pifq	20	100.569	pifq	27	502.709	57.4485			pifq	28	723.718	pifq	35	2157.23	204.787
pifq	10	10.643			pifq	20	206.265	pifq	27	617.29	58.7178			pifq	28	749.692	pifq	35	2588.76	262.724
pifq	10	16.6348			pifq	20	147.309	pifq	27	714.128	80.9741			pifq	28	1077.19	pifq	35	2515.87	205.525
pifq	10	25.7182			pifq	20	149.713	pifq	27	873.121	103.344			pifq	28	916.204	pifq	35	2020.28	157.725
pifq	10	10.8619			pifq	20	179.508	pifq	27	627.032	63.932			pifq	28	981.582	pifq	35	2542.75	223.024
pifq	10	NaN			pifq	20	114.586	pifq	27	663.175	78.3699
pifq	10	16.6348			pifq	20	195.085	pifq	27	774.395	82.7586
pifq	10	9.4665			pifq	20	128.302	pifq	27	719.131	84.4041
pifq	10	12.1478			pifq	20	127.484	pifq	27	798.767	95.8976
pifq	10	12.2298			pifq	20	169.713	pifq	27	578.227	58.3592
pifq	10	11.4638			pifq	20	171.797	pifq	27	587.958	59.4517
pifq	10	12.9412			pifq	20	84.644	pifq	27	899.985	116.477
pifq	10	18.6594			pifq	20	142.1	pifq	27	751.61	87.0728
pifq	10	13.1327			pifq	20	139.455	pifq	27	798.38	94.1321
pifq	10	13.0233
pifq	10	9.6033
Col-0	11	20.1095
Col-0	11	22.4898
Col-0	11	36.6895
Col-0	11	41.7238
Col-0	11	42.1342
Col-0	11	41.3954
Col-0	11	25.2805
Col-0	11	30.643
Col-0	11	38.5227
Col-0	11	22.5992
Col-0	11	49.0015
Col-0	11	28.2901
Col-0	11	32.312
Col-0	11	51.3818
Col-0	11	65.9099
Col-0	11	33.7073
Col-0	11	28.3448
Col-0	11	30.0411
Col-0	11	34.063
Col-0	11	35.6225
Col-0	11	37.1547
Col-0	11	24.1587
Col-0	11	28.5363
Col-0	11	34.0356
Col-0	11	20.5199
Col-0	11	43.2285
Col-0	11	22.6813
Col-0	11	31.9289
Col-0	11	36.1423
Col-0	11	60.1096
Col-0	11	33.8441
Col-0	11	31.6553
Col-0	11	26.4022
35S::PIF4	11	16.9357
35S::PIF4	11	26.5664
35S::PIF4	11	34.0083
35S::PIF4	11	12.4214
35S::PIF4	11	31.6553
35S::PIF4	11	4.1587
35S::PIF4	11	21.0397
35S::PIF4	11	12.1478
35S::PIF4	11	17.1273
35S::PIF4	11	22.3256
35S::PIF4	11	70.0138
35S::PIF4	11	12.9686
35S::PIF4	11	44.2682
35S::PIF4	11	54.0083
35S::PIF4	11	15.4583
35S::PIF4	11	16.8537
35S::PIF4	11	19.5896
35S::PIF4	11	17.3188
35S::PIF4	11	26.1834
35S::PIF4	11	12.4487
35S::PIF4	11	25.4173
35S::PIF4	11	8.53627
35S::PIF4	11	12.6676
35S::PIF4	11	10.5062
35S::PIF4	11	13.9809
35S::PIF4	11	15.9508
35S::PIF4	11	48.7005
35S::PIF4	11	15.814
35S::PIF4	11	27.6334
35S::PIF4	11	29.3845
35S::PIF4	11	11.6006
35S::PIF4	11	11.2723
35S::PIF4	11	12.7497
35S::PIF4	11	11.1355
phyb	11	18.9604
phyb	11	34.3092
phyb	11	31.327
phyb	11	21.9152
phyb	11	27.907
phyb	11	21.6143
phyb	11	27.2504
phyb	11	22.2162
phyb	11	34.9932
phyb	11	20.5199
phyb	11	21.8879
phyb	11	27.3051
phyb	11	29.7401
phyb	11	22.8181
phyb	11	20.8208
phyb	11	19.5896
phyb	11	16.0602
phyb	11	19.8906
phyb	11	21.9152
phyb	11	21.368
phyb	11	22.0247
phyb	11	23.3106
phyb	11	18.933
phyb	11	24.7333
phyb	11	18.4679
phyb	11	29.6033
phyb	11	18.9877
phyb	11	18.7141
phyb	11	21.8058
phyb	11	25.8277
phyb	11	19.8085
phyb	11	18.3858
phyb	11	18.7688
pif3	11	69.0289
pif3	11	26.4022
pif3	11	28.1806
pif3	11	21.9426
pif3	11	21.1492
pif3	11	20.3284
pif3	11	16.3612
pif3	11	24.7059
pif3	11	18.249
pif3	11	65.3079
pif3	11	64.1315
pif3	11	20.7935
pif3	11	24.7059
pif3	11	36.4159
pif3	11	29.7401
pif3	11	40.5473
pif3	11	25.855
pif3	11	25.0616
pif3	11	19.4255
pif3	11	22.052
pif3	11	16.6348
pif3	11	29.959
pif3	11	25.6909
pif3	11	18.0028
pif3	11	49.0836
pif3	11	41.9974
pif3	11	21.3133
pif3	11	25.0343
pif3	11	32.8318
pif3	11	22.5719
pif3	11	13.6252
pif3	11	13.461
pif3	11	11.5185
pif3	11	11.4638
pif4	11	17.7565
pif4	11	24.9795
pif4	11	22.0794
pif4	11	26.9221
pif4	11	31.4638
pif4	11	19.5349
pif4	11	26.9221
pif4	11	22.6813
pif4	11	27.9344
pif4	11	24.1314
pif4	11	47.524
pif4	11	28.0438
pif4	11	19.3981
pif4	11	24.2135
pif4	11	21.8332
pif4	11	20.3831
pif4	11	16.9084
pif4	11	19.8359
pif4	11	23.7757
pif4	11	37.5103
pif4	11	32.1205
pif4	11	19.1245
pif4	11	28.2354
pif4	11	30.8619
pif4	11	51.3818
pif4	11	23.3106
pif4	11	28.5363
pif4	11	23.8578
pif4	11	36.0329
pif4	11	28.2627
pif4	11	18.1122
pif4	11	24.4597
pif4	11	19.5896
pif4	11	20.0274
pif7-1	11	20.9029
pif7-1	11	20.6293
pif7-1	11	24.1587
pif7-1	11	22.6813
pif7-1	11	34.1451
pif7-1	11	21.8879
pif7-1	11	22.3803
pif7-1	11	16.9905
pif7-1	11	50.2327
pif7-1	11	17.8386
pif7-1	11	21.2312
pif7-1	11	16.5801
pif7-1	11	29.5213
pif7-1	11	24.0493
pif7-1	11	20.301
pif7-1	11	20.0274
pif7-1	11	36.5527
pif7-1	11	21.8058
pif7-1	11	29.3297
pif7-1	11	23.6936
pif7-1	11	17.2367
pif7-1	11	38.7415
pif7-1	11	17.0178
pif7-1	11	19.5623
pif7-1	11	16.7989
pif7-1	11	23.7483
pif7-1	11	21.3954
pif7-1	11	28.0712
pif7-1	11	31.3544
pif7-1	11	16.4706
pif7-1	11	17.8386
pif7-1	11	51.8469
pif7-1	11	30.7525
pif7-2	11	14.7196
pif7-2	11	53.9536
pif7-2	11	13.8167
pif7-2	11	20.3284
pif7-2	11	20.1916
pif7-2	11	17.6745
pif7-2	11	24.2135
pif7-2	11	53.4611
pif7-2	11	16.7442
pif7-2	11	15.6225
pif7-2	11	22.1888
pif7-2	11	15.6498
pif7-2	11	21.0397
pif7-2	11	16.9631
pif7-2	11	19.8632
pif7-2	11	16.2791
pif7-2	11	21.7784
pif7-2	11	18.7415
pif7-2	11	19.2887
pif7-2	11	17.7018
pif7-2	11	14.6375
pif7-2	11	25.8277
pif7-2	11	18.1943
pif7-2	11	18.4953
pif7-2	11	24.1314
pif7-2	11	15.2668
pif7-2	11	25.0069
pif7-2	11	16.9357
pif7-2	11	18.9877
pif7-2	11	28.0438
pif7-2	11	25.8824
pif3pif7	11	24.1587
pif3pif7	11	36.0603
pif3pif7	11	21.286
pif3pif7	11	51.2723
pif3pif7	11	23.9672
pif3pif7	11	33.4884
pif3pif7	11	14.8838
pif3pif7	11	26.7306
pif3pif7	11	20.301
pif3pif7	11	33.7894
pif3pif7	11	23.5021
pif3pif7	11	30.4789
pif3pif7	11	19.3981
pif3pif7	11	22.3803
pif3pif7	11	14.1177
pif3pif7	11	24.8701
pif3pif7	11	23.3379
pif3pif7	11	18.3858
pif3pif7	11	35.2121
pif3pif7	11	23.2832
pif3pif7	11	34.4734
pif3pif7	11	14.8564
pif3pif7	11	26.6485
pif3pif7	11	21.4228
pif3pif7	11	31.0261
pif3pif7	11	25.4173
pif3pif7	11	27.4419
pif3pif7	11	20.3831
pif3pif7	11	16.1423
pif3pif7	11	14.9111
pif3pif7	11	25.773
pif3pif7	11	23.3653
pif3pif7	11	21.4228
pifq	11	22.9549
pifq	11	19.3434
pifq	11	12.0657
pifq	11	24.9248
pifq	11	12.4214
pifq	11	13.8441
pifq	11	20.9029
pifq	11	16.3885
pifq	11	19.0424
pifq	11	14.6375
pifq	11	57.9755
pifq	11	12.5582
pifq	11	24.0493
pifq	11	27.1683
pifq	11	13.6799
pifq	11	17.4829
pifq	11	26.3202
pifq	11	21.1492
pifq	11	15.9781
pifq	11	19.0698
pifq	11	15.13
pifq	11	13.7346
pifq	11	21.3954
pifq	11	21.3407
pifq	11	14.5554
pifq	11	16.6621
pifq	11	15.7045
pifq	11	35.9782
pifq	11	22.0247
pifq	11	15.5404
pifq	11	24.5144
pifq	11	14.8838
pifq	11	18.2217
pifq	11	10.6977
pifq	11	11.0534
Col-0	12	31.5459
Col-0	12	33.4337
Col-0	12	49.7402
Col-0	12	58.3585
Col-0	12	47.3599
Col-0	12	41.4502
Col-0	12	33.7073
Col-0	12	41.669
Col-0	12	50.3147
Col-0	12	34.446
Col-0	12	68.8374
Col-0	12	41.7785
Col-0	12	46.7306
Col-0	12	63.1739
Col-0	12	84.5145
Col-0	12	46.074
Col-0	12	27.6608
Col-0	12	41.7785
Col-0	12	43.0917
Col-0	12	54.5282
Col-0	12	54.1178
Col-0	12	55.5952
Col-0	12	31.8195
Col-0	12	39.0972
Col-0	12	41.0945
Col-0	12	34.5008
Col-0	12	77.1547
Col-0	12	39.5897
Col-0	12	40.6567
Col-0	12	51.3818
Col-0	12	78.1397
Col-0	12	45.8277
Col-0	12	34.6376
Col-0	12	41.0131
35S::PIF4	12	25.089
35S::PIF4	12	29.5213
35S::PIF4	12	34.3366
35S::PIF4	12	19.2066
35S::PIF4	12	35.732
35S::PIF4	12	14.8564
35S::PIF4	12	35.3216
35S::PIF4	12	10.8892
35S::PIF4	12	21.9426
35S::PIF4	12	13.9535
35S::PIF4	12	25.6362
35S::PIF4	12	24.8975
35S::PIF4	12	47.9344
35S::PIF4	12	17.565
35S::PIF4	12	52.9686
35S::PIF4	12	56.115
35S::PIF4	12	23.2011
35S::PIF4	12	23.1738
35S::PIF4	12	23.037
35S::PIF4	12	15.814
35S::PIF4	12	26.1013
35S::PIF4	12	14.4186
35S::PIF4	12	24.4323
35S::PIF4	12	10.8345
35S::PIF4	12	20.5746
35S::PIF4	12	14.3092
35S::PIF4	12	20.5746
35S::PIF4	12	21.286
35S::PIF4	12	45.9372
35S::PIF4	12	14.5828
35S::PIF4	12	35.2942
35S::PIF4	12	38.5861
35S::PIF4	12	28.0165
35S::PIF4	12	20.2189
35S::PIF4	12	14.3366
35S::PIF4	12	11.2449
phyb	12	25.5814
phyb	12	64.7607
phyb	12	33.1054
phyb	12	29.7401
phyb	12	30.4515
phyb	12	30.2326
phyb	12	38.6321
phyb	12	30.8072
phyb	12	39.234
phyb	12	30.5883
phyb	12	37.7292
phyb	12	26.0192
phyb	12	28.892
phyb	12	35.2942
phyb	12	42.4351
phyb	12	27.825
phyb	12	29.6854
phyb	12	35.1027
phyb	12	20.7661
phyb	12	37.8934
phyb	12	25.1163
phyb	12	23.9672
phyb	12	27.825
phyb	12	25.8824
phyb	12	31.7921
phyb	12	25.0069
phyb	12	29.7949
phyb	12	25.7456
phyb	12	34.5828
phyb	12	21.0944
phyb	12	24.0219
phyb	12	27.8797
phyb	12	34.2272
phyb	12	23.7483
phyb	12	26.2928
phyb	12	29.1109
pif3	12	53.1054
pif3	12	32.5582
pif3	12	37.9755
pif3	12	35.8961
pif3	12	29.9864
pif3	12	25.089
pif3	12	27.6334
pif3	12	43.6937
pif3	12	37.0726
pif3	12	24.5965
pif3	12	75.4858
pif3	12	70.3148
pif3	12	26.2928
pif3	12	38.7963
pif3	12	54.1841
pif3	12	29.0288
pif3	12	35.7046
pif3	12	36.5527
pif3	12	36.1423
pif3	12	31.4912
pif3	12	30.9987
pif3	12	24.5418
pif3	12	23.721
pif3	12	37.2641
pif3	12	33.8168
pif3	12	26.7579
pif3	12	66.4844
pif3	12	44.706
pif3	12	30.6977
pif3	12	34.8017
pif3	12	44.8154
pif3	12	29.1509
pif3	12	18.4405
pif3	12	20.1916
pif3	12	18.7141
pif3	12	25.2531
pif4	12	27.6608
pif4	12	33.8988
pif4	12	32.2025
pif4	12	48.9741
pif4	12	40.5473
pif4	12	28.7278
pif4	12	36.498
pif4	12	34.9385
pif4	12	56.0056
pif4	12	29.576
pif4	12	45.0343
pif4	12	32.3393
pif4	12	58.8784
pif4	12	40.4105
pif4	12	27.3598
pif4	12	30.944
pif4	12	32.8592
pif4	12	24.7059
pif4	12	26.4296
pif4	12	33.68
pif4	12	34.3366
pif4	12	46.5664
pif4	12	41.587
pif4	12	24.6786
pif4	12	38.7963
pif4	12	34.9385
pif4	12	51.1082
pif4	12	34.5008
pif4	12	47.5788
pif4	12	34.2545
pif4	12	56.0877
pif4	12	45.8277
pif4	12	27.907
pif4	12	32.7232
pif4	12	28.1147
pif4	12	27.0512
pif7-1	12	30.0411
pif7-1	12	25.5267
pif7-1	12	33.2422
pif7-1	12	28.3995
pif7-1	12	45.7183
pif7-1	12	26.539
pif7-1	12	34.6102
pif7-1	12	33.2148
pif7-1	12	23.1738
pif7-1	12	57.2383
pif7-1	12	26.6967
pif7-1	12	29.3963
pif7-1	12	21.7064
pif7-1	12	35.2668
pif7-1	12	31.1902
pif7-1	12	30.9987
pif7-1	12	30.643
pif7-1	12	43.0917
pif7-1	12	33.2969
pif7-1	12	51.2997
pif7-1	12	37.3188
pif7-1	12	36.498
pif7-1	12	36.498
pif7-1	12	23.1738
pif7-1	12	56.7169
pif7-1	12	25.9371
pif7-1	12	32.2846
pif7-1	12	23.1464
pif7-1	12	32.394
pif7-1	12	32.8044
pif7-1	12	38.6047
pif7-1	12	48.7279
pif7-1	12	23.3927
pif7-1	12	26.4296
pif7-1	12	51.2176
pif7-1	12	50.7251
pif7-2	12	23.0643
pif7-2	12	75.048
pif7-2	12	18.1396
pif7-2	12	28.2901
pif7-2	12	24.4597
pif7-2	12	23.8031
pif7-2	12	23.8304
pif7-2	12	28.2627
pif7-2	12	80.7115
pif7-2	12	24.3503
pif7-2	12	24.2682
pif7-2	12	32.1205
pif7-2	12	21.286
pif7-2	12	31.3597
pif7-2	12	24.2152
pif7-2	12	27.0862
pif7-2	12	23.5568
pif7-2	12	46.2381
pif7-2	12	18.3311
pif7-2	12	27.141
pif7-2	12	26.3749
pif7-2	12	25.472
pif7-2	12	26.1834
pif7-2	12	22.353
pif7-2	12	50.6157
pif7-2	12	27.7155
pif7-2	12	23.6663
pif7-2	12	32.5035
pif7-2	12	23.3653
pif7-2	12	27.8523
pif7-2	12	29.6581
pif7-2	12	25.9918
pif7-2	12	36.5527
pif7-2	12	34.5281
pif3pif7	12	35.5131
pif3pif7	12	48.5637
pif3pif7	12	39.6991
pif3pif7	12	65.3079
pif3pif7	12	38.4132
pif3pif7	12	40.3284
pif3pif7	12	20.3831
pif3pif7	12	39.486
pif3pif7	12	30.9234
pif3pif7	12	44.2409
pif3pif7	12	33.9809
pif3pif7	12	39.6444
pif3pif7	12	27.2778
pif3pif7	12	23.6115
pif3pif7	12	18.8236
pif3pif7	12	34.8291
pif3pif7	12	28.6458
pif3pif7	12	27.7429
pif3pif7	12	35.1848
pif3pif7	12	49.8496
pif3pif7	12	39.3434
pif3pif7	12	47.8797
pif3pif7	12	33.68
pif3pif7	12	44.2135
pif3pif7	12	21.0397
pif3pif7	12	36.498
pif3pif7	12	32.5035
pif3pif7	12	47.2778
pif3pif7	12	33.379
pif3pif7	12	37.9481
pif3pif7	12	29.3845
pif3pif7	12	22.5719
pif3pif7	12	21.2312
pif3pif7	12	36.2955
pif3pif7	12	20.9428
pif3pif7	12	27.7602
pifq	12	22.5445
pifq	12	27.825
pifq	12	21.6416
pifq	12	23.7757
pifq	12	18.8783
pifq	12	20.8208
pifq	12	27.2778
pifq	12	38.5774
pifq	12	22.7634
pifq	12	25.7182
pifq	12	25.4968
pifq	12	48.126
pifq	12	20
pifq	12	28.0986
pifq	12	30.9713
pifq	12	18.8509
pifq	12	23.6115
pifq	12	31.8742
pifq	12	30.0685
pifq	12	16.9905
pifq	12	26.2654
pifq	12	20.301
pifq	12	20.985
pifq	12	30.0411
pifq	12	37.866
pifq	12	22.4351
pifq	12	25.5267
pifq	12	22.3803
pifq	12	37.2915
pifq	12	18.5773
pifq	12	25.1437
pifq	12	39.4529
pifq	12	20.7114
pifq	12	25.7422
pifq	12	15.1026
pifq	12	15.9234
Col-0	13	43.1738
Col-0	13	46.4942
Col-0	13	61.286
Col-0	13	74.6103
Col-0	13	66.2108
Col-0	13	61.97
Col-0	13	47.4693
Col-0	13	60.6294
Col-0	13	74.3914
Col-0	13	50.5883
Col-0	13	96.5529
Col-0	13	57.1821
Col-0	13	59.4803
Col-0	13	78.468
Col-0	13	107.552
Col-0	13	65.9646
Col-0	13	43.4474
Col-0	13	52.1752
Col-0	13	56.9085
Col-0	13	67.5788
Col-0	13	65.4447
Col-0	13	59.2614
Col-0	13	41.8058
Col-0	13	53.0507
Col-0	13	68.427
Col-0	13	46.4023
Col-0	13	86.4571
Col-0	13	46.4296
Col-0	13	48.7552
Col-0	13	63.4201
Col-0	13	131.984
Col-0	13	69.8497
Col-0	13	37.4953
Col-0	13	42.3804
35S::PIF4	13	28.7278
35S::PIF4	13	31.1355
35S::PIF4	13	46.9221
35S::PIF4	13	21.3407
35S::PIF4	13	36.6075
35S::PIF4	13	17.0725
35S::PIF4	13	58.9605
35S::PIF4	13	36.0055
35S::PIF4	13	27.2148
35S::PIF4	13	14.1177
35S::PIF4	13	35.5952
35S::PIF4	13	19.0972
35S::PIF4	13	31.3817
35S::PIF4	13	33.5705
35S::PIF4	13	59.2341
35S::PIF4	13	17.7839
35S::PIF4	13	46.9768
35S::PIF4	13	66.9769
35S::PIF4	13	25.8277
35S::PIF4	13	33.5705
35S::PIF4	13	50.1232
35S::PIF4	13	23.1191
35S::PIF4	13	29.4665
35S::PIF4	13	16.2244
35S::PIF4	13	52.0384
35S::PIF4	13	14.063
35S::PIF4	13	28.2354
35S::PIF4	13	17.7292
35S::PIF4	13	26.9768
35S::PIF4	13	34.3913
35S::PIF4	13	59.7812
35S::PIF4	13	17.8113
35S::PIF4	13	45.8551
35S::PIF4	13	71.4913
35S::PIF4	13	18.4132
35S::PIF4	13	16.3616
phyb	13	32.5035
phyb	13	73.5159
phyb	13	45.089
phyb	13	38.3038
phyb	13	35.9508
phyb	13	38.4406
phyb	13	51.1903
phyb	13	36.6622
phyb	13	52.5035
phyb	13	43.6937
phyb	13	54.1451
phyb	13	38.851
phyb	13	45.773
phyb	13	44.2409
phyb	13	53.3517
phyb	13	42.7087
phyb	13	43.9673
phyb	13	57.5925
phyb	13	29.7949
phyb	13	55.4858
phyb	13	33.5432
phyb	13	30.0958
phyb	13	29.7949
phyb	13	29.3571
phyb	13	37.4009
phyb	13	30.0137
phyb	13	41.3134
phyb	13	32.9139
phyb	13	40.903
phyb	13	28.2901
phyb	13	39.4255
phyb	13	36.5527
phyb	13	44.5965
phyb	13	34.1451
phyb	13	33.2148
phyb	13	47.3052
pif3	13	56.6896
pif3	13	44.1314
pif3	13	48.208
pif3	13	48.5637
pif3	13	39.9727
pif3	13	41.5322
pif3	13	33.078
pif3	13	47.1136
pif3	13	50.9714
pif3	13	33.7347
pif3	13	87.4147
pif3	13	77.8935
pif3	13	42.0794
pif3	13	54.5555
pif3	13	75.2943
pif3	13	42.7361
pif3	13	59.6444
pif3	13	39.8633
pif3	13	50.944
pif3	13	40.5473
pif3	13	36.5527
pif3	13	49.193
pif3	13	29.1656
pif3	13	43.5021
pif3	13	44.8975
pif3	13	34.9659
pif3	13	81.9974
pif3	13	76.6349
pif3	13	40.301
pif3	13	46.3476
pif3	13	63.7211
pif3	13	37.9207
pif3	13	28.1806
pif3	13	24.706
pif3	13	29.4118
pif3	13	31.5233
pif4	13	34.0904
pif4	13	44.4597
pif4	13	43.1191
pif4	13	65.9919
pif4	13	52.8318
pif4	13	36.8811
pif4	13	51.2723
pif4	13	43.9399
pif4	13	60.6294
pif4	13	43.6389
pif4	13	57.2094
pif4	13	45.8825
pif4	13	71.3545
pif4	13	52.9686
pif4	13	40.9303
pif4	13	44.2135
pif4	13	43.6937
pif4	13	36.6075
pif4	13	38.8236
pif4	13	39.0972
pif4	13	45.9098
pif4	13	77.2642
pif4	13	56.7169
pif4	13	38.3859
pif4	13	49.4392
pif4	13	46.0466
pif4	13	61.8059
pif4	13	46.2108
pif4	13	66.8127
pif4	13	45.4994
pif4	13	77.6472
pif4	13	53.5158
pif4	13	39.895
pif4	13	45.8551
pif4	13	41.8058
pif4	13	37.0452
pif7-1	13	41.0398
pif7-1	13	39.2066
pif7-1	13	50.4515
pif7-1	13	47.825
pif7-1	13	66.1287
pif7-1	13	58.7963
pif7-1	13	42.8455
pif7-1	13	47.825
pif7-1	13	30.4789
pif7-1	13	68.5364
pif7-1	13	33.8441
pif7-1	13	44.6786
pif7-1	13	34.5281
pif7-1	13	43.9673
pif7-1	13	47.0863
pif7-1	13	44.5692
pif7-1	13	45.773
pif7-1	13	60.4652
pif7-1	13	55.5405
pif7-1	13	85.007
pif7-1	13	57.1821
pif7-1	13	43.4474
pif7-1	13	53.9536
pif7-1	13	37.3188
pif7-1	13	68.1807
pif7-1	13	39.1519
pif7-1	13	51.5459
pif7-1	13	42.1068
pif7-1	13	48.3722
pif7-1	13	53.8569
pif7-1	13	66.8127
pif7-1	13	78.7538
pif7-1	13	31.2176
pif7-1	13	35.8319
pif7-1	13	68.0439
pif7-1	13	88.1617
pif7-2	13	30.944
pif7-2	13	82.3805
pif7-2	13	25.6088
pif7-2	13	34.5828
pif7-2	13	34.3913
pif7-2	13	29.1109
pif7-2	13	38.851
pif7-2	13	38.9604
pif7-2	13	80.7936
pif7-2	13	39.6718
pif7-2	13	30.0958
pif7-2	13	43.1191
pif7-2	13	36.498
pif7-2	13	41.7785
pif7-2	13	37.7019
pif7-2	13	37.4556
pif7-2	13	37.4556
pif7-2	13	88.728
pif7-2	13	31.7374
pif7-2	13	42.9823
pif7-2	13	40.6841
pif7-2	13	32.996
pif7-2	13	47.524
pif7-2	13	40.6294
pif7-2	13	69.6582
pif7-2	13	45.3079
pif7-2	13	33.3243
pif7-2	13	47.524
pif7-2	13	44.9249
pif7-2	13	47.0589
pif7-2	13	52.8866
pif7-2	13	40.0041
pif7-2	13	44.6786
pif7-2	13	52.6025
pif3pif7	13	47.1684
pif3pif7	13	66.8948
pif3pif7	13	47.8797
pif3pif7	13	76.717
pif3pif7	13	46.7032
pif3pif7	13	65.8551
pif3pif7	13	30.4515
pif3pif7	13	48.126
pif3pif7	13	43.1465
pif3pif7	13	58.5501
pif3pif7	13	49.6034
pif3pif7	13	52.312
pif3pif7	13	39.4802
pif3pif7	13	44.7607
pif3pif7	13	27.7702
pif3pif7	13	47.9071
pif3pif7	13	38.3585
pif3pif7	13	33.4611
pif3pif7	13	58.9331
pif3pif7	13	71.1082
pif3pif7	13	53.4064
pif3pif7	13	96.334
pif3pif7	13	50.6157
pif3pif7	13	57.6472
pif3pif7	13	35.0206
pif3pif7	13	54.9386
pif3pif7	13	51.7648
pif3pif7	13	69.1657
pif3pif7	13	55.9509
pif3pif7	13	54.9659
pif3pif7	13	43.6389
pif3pif7	13	40.8767
pif3pif7	13	33.214
pif3pif7	13	50.26
pif3pif7	13	46.1834
pif3pif7	13	38.6868
pifq	13	42.3257
pifq	13	34.8564
pifq	13	22.1068
pifq	13	39.0972
pifq	13	24.6512
pifq	13	28.3995
pifq	13	35.9235
pifq	13	50.6978
pifq	13	30.8072
pifq	13	38.0849
pifq	13	31.4091
pifq	13	78.9605
pifq	13	26.2107
pifq	13	46.8127
pifq	13	42.1342
pifq	13	26.5938
pifq	13	32.4761
pifq	13	45.3626
pifq	13	42.1068
pifq	13	25.1984
pifq	13	32.011
pifq	13	28.1806
pifq	13	30.8345
pifq	13	38.7142
pifq	13	57.2094
pifq	13	32.9139
pifq	13	40.4926
pifq	13	32.695
pifq	13	71.6828
pifq	13	26.9421
pifq	13	26.0422
pifq	13	60.3197
pifq	13	31.5506
pifq	13	33.5432
pifq	13	21.4501
pifq	13	23.3425
Col-0	14	27.4419
Col-0	14	35.0753
Col-0	14	57.3462
Col-0	14	57.4009
Col-0	14	54.1178
Col-0	14	64.4051
Col-0	14	43.8305
Col-0	14	50.5883
Col-0	14	45.5541
Col-0	14	40.8209
Col-0	14	58.6321
Col-0	14	44.2682
Col-0	14	48.2901
Col-0	14	60.7388
Col-0	14	74.665
Col-0	14	56.1424
Col-0	14	34.2545
Col-0	14	34.1724
Col-0	14	56.5254
Col-0	14	63.9947
Col-0	14	52.2847
Col-0	14	61.1219
Col-0	14	45.0069
Col-0	14	47.2778
Col-0	14	41.9153
Col-0	14	40.6567
Col-0	14	61.5323
Col-0	14	47.4693
Col-0	14	49.2751
Col-0	14	62.1889
Col-0	14	76.9632
Col-0	14	59.7812
Col-0	14	37.7019
Col-0	14	38.2589
35S::PIF4	14	NaN
35S::PIF4	14	NaN
35S::PIF4	14	20.7388
35S::PIF4	14	4.43229
35S::PIF4	14	8.91931
35S::PIF4	14	4.18606
35S::PIF4	14	8.91931
35S::PIF4	14	4.40493
35S::PIF4	14	14.9385
35S::PIF4	14	4.62381
35S::PIF4	14	9.52122
35S::PIF4	14	4.43229
35S::PIF4	14	NaN
35S::PIF4	14	16.5801
35S::PIF4	14	NaN
35S::PIF4	14	NaN
35S::PIF4	14	16.7169
35S::PIF4	14	22.353
35S::PIF4	14	14.446
35S::PIF4	14	4.78797
35S::PIF4	14	15.8961
35S::PIF4	14	4.43229
35S::PIF4	14	18.2217
35S::PIF4	14	4.62381
35S::PIF4	14	17.7018
35S::PIF4	14	4.59645
35S::PIF4	14	12.3393
35S::PIF4	14	9.08347
35S::PIF4	14	6.32012
35S::PIF4	14	17.8933
35S::PIF4	14	15.4583
35S::PIF4	14	NaN
35S::PIF4	14	16.2517
35S::PIF4	14	19.6612
35S::PIF4	14	4.54173
35S::PIF4	14	NaN
phyb	14	31.5459
phyb	14	29.7949
phyb	14	23.7757
phyb	14	32.9686
phyb	14	6.97676
phyb	14	30.9166
phyb	14	37.866
phyb	14	9.68538
phyb	14	35.0206
phyb	14	6.70316
phyb	14	28.6458
phyb	14	28.8646
phyb	14	34.9385
phyb	14	20.684
phyb	14	9.11083
phyb	14	26.4022
phyb	14	32.9412
phyb	14	24.7333
phyb	14	14.0356
phyb	14	32.6129
phyb	14	23.6663
phyb	14	32.4488
phyb	14	28.5363
phyb	14	39.8906
phyb	14	13.379
phyb	14	28.1533
phyb	14	9.84954
phyb	14	29.2477
phyb	14	28.3722
phyb	14	34.5828
phyb	14	25.2805
phyb	14	12.1478
phyb	14	21.8605
phyb	14	32.6129
phyb	14	26.7032
pif3	14	30.0958
pif3	14	39.1246
pif3	14	33.762
pif3	14	42.1068
pif3	14	40.7935
pif3	14	32.1752
pif3	14	32.5582
pif3	14	40.6294
pif3	14	43.8031
pif3	14	23.9399
pif3	14	48.7279
pif3	14	40.8482
pif3	14	37.483
pif3	14	38.6047
pif3	14	61.2587
pif3	14	33.1601
pif3	14	30.1505
pif3	14	39.4529
pif3	14	37.4009
pif3	14	38.2764
pif3	14	41.6143
pif3	14	32.7497
pif3	14	35.4584
pif3	14	41.9153
pif3	14	44.4324
pif3	14	27.7702
pif3	14	45.6636
pif3	14	40.4652
pif3	14	34.364
pif3	14	40.7935
pif3	14	61.1492
pif3	14	34.3048
pif3	14	21.286
pif3	14	21.3954
pif3	14	26.1834
pif3	14	27.8797
pif4	14	29.8769
pif4	14	31.0534
pif4	14	45.0069
pif4	14	47.1957
pif4	14	50.8072
pif4	14	35.2121
pif4	14	48.4543
pif4	14	42.6813
pif4	14	33.2422
pif4	14	40.5199
pif4	14	57.4283
pif4	14	49.9043
pif4	14	63.8579
pif4	14	41.9426
pif4	14	37.8934
pif4	14	37.866
pif4	14	33.4064
pif4	14	28.892
pif4	14	22.9549
pif4	14	34.063
pif4	14	47.0589
pif4	14	50.0685
pif4	14	51.6007
pif4	14	36.9631
pif4	14	51.4091
pif4	14	45.5268
pif4	14	40.1916
pif4	14	42.4078
pif4	14	59.7539
pif4	14	47.8797
pif4	14	61.1492
pif4	14	42.1615
pif4	14	35.1848
pif4	14	37.3862
pif4	14	34.0594
pif4	14	26.8603
pif7-1	14	16.4706
pif7-1	14	34.8564
pif7-1	14	37.7019
pif7-1	14	46.7032
pif7-1	14	63.7211
pif7-1	14	40.6567
pif7-1	14	41.2313
pif7-1	14	38.3859
pif7-1	14	31.3817
pif7-1	14	45.6089
pif7-1	14	31.327
pif7-1	14	37.2641
pif7-1	14	25.855
pif7-1	14	45.7183
pif7-1	14	37.9481
pif7-1	14	24.1587
pif7-1	14	36.3886
pif7-1	14	39.6718
pif7-1	14	45.6909
pif7-1	14	66.3476
pif7-1	14	43.8578
pif7-1	14	44.6786
pif7-1	14	39.3708
pif7-1	14	32.6676
pif7-1	14	47.5788
pif7-1	14	34.1451
pif7-1	14	40.7662
pif7-1	14	24.104
pif7-1	14	45.3626
pif7-1	14	41.4502
pif7-1	14	50.2327
pif7-1	14	54.063
pif7-1	14	6.9494
pif7-1	14	12.4214
pif7-1	14	13.1054
pif7-1	14	11.327
pif7-2	14	31.8742
pif7-2	14	36.6348
pif7-2	14	22.353
pif7-2	14	32.8044
pif7-2	14	31.628
pif7-2	14	30.3147
pif7-2	14	32.5308
pif7-2	14	23.1738
pif7-2	14	38.2217
pif7-2	14	26.8947
pif7-2	14	23.5842
pif7-2	14	41.669
pif7-2	14	32.695
pif7-2	14	35.814
pif7-2	14	31.4365
pif7-2	14	36.6348
pif7-2	14	33.0233
pif7-2	14	39.7538
pif7-2	14	24.6786
pif7-2	14	34.446
pif7-2	14	31.9289
pif7-2	14	32.7497
pif7-2	14	32.5308
pif7-2	14	25.3352
pif7-2	14	38.8783
pif7-2	14	23.8851
pif7-2	14	32.9139
pif7-2	14	32.695
pif7-2	14	34.0356
pif7-2	14	37.2367
pif7-2	14	30.1779
pif7-2	14	39.8906
pif7-2	14	29.2203
pif7-2	14	34.364
pif3pif7	14	39.2887
pif3pif7	14	61.2313
pif3pif7	14	42.0521
pif3pif7	14	55.4584
pif3pif7	14	33.078
pif3pif7	14	45.4721
pif3pif7	14	30.7798
pif3pif7	14	49.877
pif3pif7	14	35.431
pif3pif7	14	59.0699
pif3pif7	14	42.6266
pif3pif7	14	48.3722
pif3pif7	14	36.4159
pif3pif7	14	28.3995
pif3pif7	14	30.8619
pif3pif7	14	43.0097
pif3pif7	14	32.0384
pif3pif7	14	32.2299
pif3pif7	14	44.7333
pif3pif7	14	64.1041
pif3pif7	14	42.654
pif3pif7	14	51.2176
pif3pif7	14	35.6225
pif3pif7	14	46.5117
pif3pif7	14	32.8592
pif3pif7	14	52.1479
pif3pif7	14	35.6772
pif3pif7	14	60.7388
pif3pif7	14	42.0521
pif3pif7	14	50.1232
pif3pif7	14	39.234
pif3pif7	14	29.0288
pif3pif7	14	30.8619
pif3pif7	14	47.2032
pif3pif7	14	34.1685
pif3pif7	14	34.3048
pifq	14	28.208
pifq	14	37.4283
pifq	14	18.5773
pifq	14	27.2778
pifq	14	23.9672
pifq	14	27.7155
pifq	14	35.4857
pifq	14	27.6061
pifq	14	29.6307
pifq	14	33.9809
pifq	14	28.7552
pifq	14	42.8455
pifq	14	17.5103
pifq	14	21.9426
pifq	14	43.5842
pifq	14	28.3722
pifq	14	30.8619
pifq	14	28.6458
pifq	14	39.0425
pifq	14	23.2011
pifq	14	23.0917
pifq	14	26.7853
pifq	14	27.4419
pifq	14	34.8564
pifq	14	39.2887
pifq	14	31.7648
pifq	14	38.5774
pifq	14	30.0411
pifq	14	46.4296
pifq	14	20.9029
pifq	14	23.2285
pifq	14	41.7238
pifq	14	29.4939
pifq	14	32.6959
pifq	14	22.4624
pifq	14	24.104
Col-0	15	43.8852
Col-0	15	46.84
Col-0	15	74.0084
Col-0	15	75.8688
Col-0	15	73.4338
Col-0	15	78.5227
Col-0	15	56.4707
Col-0	15	59.0973
Col-0	15	53.7074
Col-0	15	55.0206
Col-0	15	77.4283
Col-0	15	58.3585
Col-0	15	61.3681
Col-0	15	78.9879
Col-0	15	95.4038
Col-0	15	79.9728
Col-0	15	47.2778
Col-0	15	50.0685
Col-0	15	69.9865
Col-0	15	76.5255
Col-0	15	67.2505
Col-0	15	77.2642
Col-0	15	54.6376
Col-0	15	57.4283
Col-0	15	49.9864
Col-0	15	53.5979
Col-0	15	71.1903
Col-0	15	56.6896
Col-0	15	59.5897
Col-0	15	75.732
Col-0	15	95.9236
Col-0	15	74.5008
Col-0	15	49.3024
Col-0	15	51.245
35S::PIF4	15	6.70316
35S::PIF4	15	5.19837
35S::PIF4	15	21.9152
35S::PIF4	15	15.5951
35S::PIF4	15	22.3256
35S::PIF4	15	4.48701
35S::PIF4	15	23.0643
35S::PIF4	15	4.89741
35S::PIF4	15	24.0493
35S::PIF4	15	5.11629
35S::PIF4	15	18.1396
35S::PIF4	15	9.49386
35S::PIF4	15	17.3735
35S::PIF4	15	23.5842
35S::PIF4	15	20.5746
35S::PIF4	15	NaN
35S::PIF4	15	24.1587
35S::PIF4	15	30.5883
35S::PIF4	15	23.4747
35S::PIF4	15	15.6498
35S::PIF4	15	15.4857
35S::PIF4	15	5.06157
35S::PIF4	15	14.8017
35S::PIF4	15	5.08893
35S::PIF4	15	17.2641
35S::PIF4	15	4.78797
35S::PIF4	15	20.301
35S::PIF4	15	14.9111
35S::PIF4	15	13.5978
35S::PIF4	15	22.1068
35S::PIF4	15	17.0999
35S::PIF4	15	NaN
35S::PIF4	15	13.3242
35S::PIF4	15	21.9973
35S::PIF4	15	4.54173
35S::PIF4	15	9.32971
phyb	15	34.3366
phyb	15	43.5295
phyb	15	26.1834
phyb	15	42.6813
phyb	15	38.7415
phyb	15	49.9043
phyb	15	18.2764
phyb	15	42.8181
phyb	15	32.0384
phyb	15	37.0179
phyb	15	39.6718
phyb	15	47.3325
phyb	15	39.918
phyb	15	27.524
phyb	15	27.5787
phyb	15	45.089
phyb	15	32.6403
phyb	15	31.8195
phyb	15	38.0302
phyb	15	30.4515
phyb	15	38.6047
phyb	15	37.7019
phyb	15	50.5063
phyb	15	23.1191
phyb	15	44.1041
phyb	15	20.5472
phyb	15	33.2422
phyb	15	33.379
phyb	15	42.9549
phyb	15	37.0179
phyb	15	36.7443
phyb	15	26.3749
phyb	15	37.2094
phyb	15	34.6649
pif3	15	43.6937
pif3	15	44.2956
pif3	15	45.7183
pif3	15	53.297
pif3	15	51.2723
pif3	15	41.4775
pif3	15	43.6663
pif3	15	54.747
pif3	15	56.7169
pif3	15	38.1943
pif3	15	62.2984
pif3	15	57.483
pif3	15	48.0439
pif3	15	54.3914
pif3	15	81.3134
pif3	15	42.9549
pif3	15	37.0452
pif3	15	50.1779
pif3	15	46.8948
pif3	15	47.2231
pif3	15	52.0931
pif3	15	41.5596
pif3	15	42.6266
pif3	15	55.349
pif3	15	57.8661
pif3	15	34.8017
pif3	15	48.7005
pif3	15	56.0877
pif3	15	47.0042
pif3	15	51.5459
pif3	15	75.732
pif3	15	44.7881
pif3	15	30.8619
pif3	15	28.6184
pif3	15	32.312
pif3	15	34.9385
pif4	15	32.5035
pif4	15	34.8838
pif4	15	57.7293
pif4	15	58.7142
pif4	15	65.4721
pif4	15	45.1437
pif4	15	63.2559
pif4	15	50.9714
pif4	15	49.1383
pif4	15	46.3476
pif4	15	71.4365
pif4	15	61.8332
pif4	15	66.2929
pif4	15	50.3695
pif4	15	43.2559
pif4	15	43.8852
pif4	15	42.654
pif4	15	28.208
pif4	15	36.4433
pif4	15	45.4721
pif4	15	62.2436
pif4	15	62.8456
pif4	15	69.1657
pif4	15	47.7156
pif4	15	66.9495
pif4	15	56.3339
pif4	15	54.9112
pif4	15	47.6061
pif4	15	77.3736
pif4	15	65.4174
pif4	15	66.9222
pif4	15	53.0234
pif4	15	45.4721
pif4	15	45.0617
pif4	15	44.1314
pif4	15	28.9467
pif7-1	15	35.6225
pif7-1	15	42.1068
pif7-1	15	43.721
pif7-1	15	51.929
pif7-1	15	82.0248
pif7-1	15	49.9317
pif7-1	15	52.2847
pif7-1	15	42.8729
pif7-1	15	39.234
pif7-1	15	50.7251
pif7-1	15	40.0548
pif7-1	15	49.9591
pif7-1	15	32.8865
pif7-1	15	51.8469
pif7-1	15	52.0111
pif7-1	15	36.6622
pif7-1	15	49.0015
pif7-1	15	49.0015
pif7-1	15	59.2614
pif7-1	15	90.2054
pif7-1	15	54.5555
pif7-1	15	56.6622
pif7-1	15	44.8701
pif7-1	15	40.4378
pif7-1	15	63.1191
pif7-1	15	44.706
pif7-1	15	55.6499
pif7-1	15	30.4515
pif7-1	15	52.2026
pif7-1	15	57.6745
pif7-1	15	67.5514
pif7-1	15	72.0932
pif7-1	15	21.8332
pif7-1	15	20.1916
pif7-1	15	11.1628
pif7-1	15	14.3092
pif7-2	15	36.3886
pif7-2	15	49.6307
pif7-2	15	29.7675
pif7-2	15	38.6047
pif7-2	15	41.1492
pif7-2	15	36.7443
pif7-2	15	41.3134
pif7-2	15	32.1205
pif7-2	15	45.0069
pif7-2	15	30.4789
pif7-2	15	36.7169
pif7-2	15	35.9782
pif7-2	15	39.8359
pif7-2	15	44.1861
pif7-2	15	33.379
pif7-2	15	46.9221
pif7-2	15	40.4652
pif7-2	15	49.4666
pif7-2	15	36.1697
pif7-2	15	42.654
pif7-2	15	44.7607
pif7-2	15	41.7238
pif7-2	15	45.4994
pif7-2	15	36.0876
pif7-2	15	47.524
pif7-2	15	29.7675
pif7-2	15	40.5199
pif7-2	15	32.8592
pif7-2	15	45.6089
pif7-2	15	49.0836
pif7-2	15	38.7689
pif7-2	15	49.8496
pif7-2	15	42.353
pif7-2	15	46.7032
pif3pif7	15	51.0808
pif3pif7	15	75.1575
pif3pif7	15	52.8592
pif3pif7	15	60.0822
pif3pif7	15	42.3804
pif3pif7	15	50.3147
pif3pif7	15	36.6622
pif3pif7	15	55.1848
pif3pif7	15	44.6513
pif3pif7	15	69.193
pif3pif7	15	44.706
pif3pif7	15	57.6198
pif3pif7	15	44.6513
pif3pif7	15	33.1875
pif3pif7	15	34.1451
pif3pif7	15	57.1821
pif3pif7	15	41.5322
pif3pif7	15	41.8606
pif3pif7	15	57.1
pif3pif7	15	83.639
pif3pif7	15	60.2737
pif3pif7	15	67.3599
pif3pif7	15	46.457
pif3pif7	15	52.0111
pif3pif7	15	36.2791
pif3pif7	15	59.3435
pif3pif7	15	46.5938
pif3pif7	15	75.1301
pif3pif7	15	46.9221
pif3pif7	15	60.3558
pif3pif7	15	49.7128
pif3pif7	15	37.0999
pif3pif7	15	36.9631
pif3pif7	15	60.3011
pif3pif7	15	46.7032
pif3pif7	15	44.9522
pifq	15	29.0288
pifq	15	44.4324
pifq	15	28.3995
pifq	15	26.457
pifq	15	31.9289
pifq	15	31.9563
pifq	15	41.2039
pifq	15	53.6526
pifq	15	38.55
pifq	15	44.022
pifq	15	32.8592
pifq	15	51.7922
pifq	15	25.8003
pifq	15	24.9795
pifq	15	51.7375
pifq	15	35.2395
pifq	15	41.587
pifq	15	30.3968
pifq	15	48.5911
pifq	15	28.8099
pifq	15	31.4912
pifq	15	35.6772
pifq	15	33.3516
pifq	15	47.6608
pifq	15	58.4406
pifq	15	37.5651
pifq	15	45.6909
pifq	15	35.5404
pifq	15	54.3093
pifq	15	24.5144
pifq	15	26.539
pifq	15	53.4611
pifq	15	37.7566
pifq	15	44.3503
pifq	15	28.8373
pifq	15	28.3174
Col-0	16	59.8086
Col-0	16	62.3804
Col-0	16	103.174
Col-0	16	64.3503
Col-0	16	74.966
Col-0	16	83.9947
Col-0	16	76.334
Col-0	16	56.7443
Col-0	16	67.3052
Col-0	16	101.231
Col-0	16	119.097
Col-0	16	102.025
Col-0	16	79.0973
Col-0	16	102.49
Col-0	16	97.401
Col-0	16	66.5665
Col-0	16	93.1603
Col-0	16	101.423
Col-0	16	109.713
Col-0	16	66.9769
Col-0	16	65.1164
Col-0	16	80.7389
Col-0	16	77.2368
Col-0	16	62.8182
Col-0	16	67.0863
Col-0	16	106.512
Col-0	16	125.062
Col-0	16	104.569
Col-0	16	80.3285
Col-0	16	98.6596
Col-0	16	99.9455
Col-0	16	70.561
Col-0	16	99.7813
Col-0	16	102.764
35S::PIF4	16	8.70043
35S::PIF4	16	4.10398
35S::PIF4	16	25.6088
35S::PIF4	16	10.2052
35S::PIF4	16	9.82218
35S::PIF4	16	5.55405
35S::PIF4	16	14.8017
35S::PIF4	16	22.6266
35S::PIF4	16	NaN
35S::PIF4	16	29.2477
35S::PIF4	16	18.5226
35S::PIF4	16	32.4214
35S::PIF4	16	17.7292
35S::PIF4	16	28.9467
35S::PIF4	16	26.539
35S::PIF4	16	18.3311
35S::PIF4	16	9.35707
35S::PIF4	16	NaN
35S::PIF4	16	NaN
35S::PIF4	16	21.9152
35S::PIF4	16	10.9439
35S::PIF4	16	15.4036
35S::PIF4	16	14.4186
35S::PIF4	16	21.7511
35S::PIF4	16	NaN
35S::PIF4	16	28.0712
35S::PIF4	16	25.3352
35S::PIF4	16	31.0534
35S::PIF4	16	12.3119
35S::PIF4	16	24.9795
35S::PIF4	16	30.2053
35S::PIF4	16	19.5896
35S::PIF4	16	5.49933
35S::PIF4	16	24.0767
phyb	16	60.219
phyb	16	53.7347
phyb	16	36.0055
phyb	16	59.6444
phyb	16	43.5295
phyb	16	42.4625
phyb	16	55.3216
phyb	16	41.6143
phyb	16	54.4734
phyb	16	57.0179
phyb	16	49.7675
phyb	16	52.996
phyb	16	60.6294
phyb	16	65.0617
phyb	16	44.5692
phyb	16	58.6321
phyb	16	47.6882
phyb	16	48.3996
phyb	16	36.5527
phyb	16	53.981
phyb	16	44.6786
phyb	16	41.1218
phyb	16	52.2299
phyb	16	37.5651
phyb	16	45.1711
phyb	16	59.0699
phyb	16	47.6061
phyb	16	45.4447
phyb	16	53.68
phyb	16	62.4352
phyb	16	48.7005
phyb	16	55.1848
phyb	16	38.4953
pif3	16	45.9919
[truncated: 7,156 more rows]

## Sheet: rosette area_hAT
Plant Info	Measuring Date	rosette area (mm2)			Plant Info	Measuring Date	rosette area (mm2)	Plant Info	Measuring Date	rosette area (mm2)	RGR 20-27			Plant Info	Measuring Date	rosette area (mm2)	Plant Info	Measuring Date	rosette area (mm2)	RGR 28-35
Col-0	10	20.0225			Col-0	20	210.884	Col-0	27	739.43	75.5065			Col-0	28	748.491	Col-0	35	1436.06	98.2242
Col-0	10	24.8423			Col-0	20	167.837	Col-0	27	682.199	73.4803			Col-0	28	618.606	Col-0	35	1119.5	71.5563
Col-0	10	13.2749			Col-0	20	186.813	Col-0	27	543.501	50.9554			Col-0	28	694.427	Col-0	35	1207.14	73.2442
Col-0	10	17.2133			Col-0	20	198.986	Col-0	27	574.127	53.5915			Col-0	28	530.721	Col-0	35	1615.66	154.991
Col-0	10	15.7536			Col-0	20	159.905	Col-0	27	537.607	53.9574			Col-0	28	457.434	Col-0	35	1409.29	135.979
Col-0	10	16.4697			Col-0	20	200.418	Col-0	27	520.338	45.7029			Col-0	28	660.496	Col-0	35	1166.16	72.237
Col-0	10	8.7306			Col-0	20	190.503	Col-0	27	751.548	80.1492			Col-0	28	818.473	Col-0	35	1418.19	85.6732
Col-0	10	25.5308			Col-0	20	215.098	Col-0	27	867.579	93.2117			Col-0	28	944.585	Col-0	35	1553.08	86.9283
Col-0	10	21.0967			Col-0	20	174.474	Col-0	27	723.18	78.3866			Col-0	28	807.539	Col-0	35	1319.75	73.1734
Col-0	10	15.1753			Col-0	20	175.218	Col-0	27	600.649	60.7758			Col-0	28	804.785	Col-0	35	1210.33	57.9352
Col-0	10	15.5333			Col-0	20	219.78	Col-0	27	601.723	54.5633			Col-0	28	610.536	Col-0	35	1509.93	128.484
Col-0	10	17.1032			Col-0	20	138.257	Col-0	27	486.132	49.6964			Col-0	28	702.111	Col-0	35	1621.83	131.388
Col-0	10	16.2218			Col-0	20	226.307	Col-0	27	806.272	82.8522			Col-0	28	644.55	Col-0	35	1536.37	127.402
Col-0	10	15.5609			Col-0	20	186.593	Col-0	27	411.55	32.1368			Col-0	28	657.88	Col-0	35	1220.3	80.3459
Col-0	10	14.6244			Col-0	20	187.556	Col-0	27	560.411	53.2649			Col-0	28	615.686	Col-0	35	1674.43	151.249
Col-0	10	24.7046			Col-0	20	200.005	Col-0	27	734.555	76.3642			Col-0	28	751.851	Col-0	35	1662.15	130.042
Col-0	10	15.3681			Col-0	20	319.149	Col-0	27	527.334	29.7407			Col-0	28	793.328	Col-0	35	1363.96	81.5184
Col-0	10	16.0566			Col-0	20	258.641	Col-0	27	727.725	67.012			35S::PIF4	28	51.8328	35S::PIF4	35	437.769	55.1338
Col-0	10	13.1372			Col-0	20	203.365	Col-0	27	621.415	59.7214			35S::PIF4	28	144.84	35S::PIF4	35	254.014	15.5963
Col-0	10	12.8343			Col-0	20	223.553	Col-0	27	665.977	63.2034			35S::PIF4	28	167.699	35S::PIF4	35	808.2	91.5002
Col-0	10	16.5799			Col-0	20	236.773	Col-0	27	509.845	39.0103			35S::PIF4	28	53.7056	35S::PIF4	35	667.437	87.6759
Col-0	10	13.9635			Col-0	20	197.003	Col-0	27	634.304	62.4716			35S::PIF4	28	122.476	35S::PIF4	35	471.012	49.7908
Col-0	10	15.1202			Col-0	20	232.724	Col-0	27	775.316	77.5131			35S::PIF4	28	94.8799	35S::PIF4	35	642.952	78.2961
Col-0	10	10.4106			Col-0	20	234.652	Col-0	27	881.984	92.4759			35S::PIF4	28	168.691	35S::PIF4	35	510.754	48.8662
Col-0	10	20.4357			Col-0	20	239.444	Col-0	27	787.021	78.2252			35S::PIF4	28	74.8849	35S::PIF4	35	456.387	54.5004
Col-0	10	18.4802			Col-0	20	206.422	Col-0	27	750.749	77.761			35S::PIF4	28	283.18	35S::PIF4	35	691.48	58.3286
Col-0	10	13.7431			Col-0	20	219.78	Col-0	27	567.902	49.7318			35S::PIF4	28	397.752	35S::PIF4	35	521.771	17.7169
Col-0	10	14.8999			Col-0	20	261.643	Col-0	27	625.794	52.0216			35S::PIF4	28	226.472	35S::PIF4	35	1088.27	123.114
Col-0	10	15.9464			Col-0	20	170.977	Col-0	27	652.454	68.7825			35S::PIF4	28	221.405	35S::PIF4	35	503.538	40.3048
Col-0	10	13.688			Col-0	20	264.645	Col-0	27	677.599	58.9935			35S::PIF4	28	204.329	35S::PIF4	35	308.959	14.9471
Col-0	10	13.991			Col-0	20	219.587	Col-0	27	578.698	51.3016			35S::PIF4	28	82.7342	35S::PIF4	35	576.66	70.5609
Col-0	10	13.1648			Col-0	20	222.561	Col-0	27	667.712	63.5929			35S::PIF4	28	402.627	35S::PIF4	35	459.334	8.10109
Col-0	10	21.4822			Col-0	20	230.934	Col-0	27	745.213	73.4685			35S::PIF4	28	348.343	35S::PIF4	35	1202.07	121.961
Col-0	10	13.9635			Col-0	20	353.465	Col-0	27	715.992	51.7895			35S::PIF4	28	133.575	35S::PIF4	35	1289.71	165.161
35S::PIF4	10	4.40661			Col-0	20	216.998	Col-0	27	614.943	56.8492			35S::PIF4	28	239.417	35S::PIF4	35	579.58	48.5947
35S::PIF4	10	NaN			Col-0	20	153.791	Col-0	27	676.14	74.6213			phyb	28	271.943	phyb	35	487.564	30.803
35S::PIF4	10	4.9299			Col-0	20	159.354	Col-0	27	507.724	49.7672			phyb	28	215.538	phyb	35	318.708	14.7385
35S::PIF4	10	NaN			Col-0	20	192.486	Col-0	27	497.754	43.6097			phyb	28	128.838	phyb	35	352.116	31.8968
35S::PIF4	10	5.50827			Col-0	20	140.02	Col-0	27	632.542	70.3602			phyb	28	232.339	phyb	35	479.054	35.245
35S::PIF4	10	7.65649			Col-0	20	194.139	Col-0	27	770.083	82.2778			phyb	28	183.315	phyb	35	246.853	9.07684
35S::PIF4	10	5.7286			Col-0	20	199.867	Col-0	27	881.02	97.3075			phyb	28	155.609	phyb	35	495.937	48.6183
35S::PIF4	10	NaN			Col-0	20	194.056	Col-0	27	765.787	81.6758			phyb	28	60.4532	phyb	35	305.433	34.9972
35S::PIF4	10	6.41713			Col-0	20	150.926	Col-0	27	758.323	86.7709			phyb	28	81.0541	phyb	35	261.312	25.7511
35S::PIF4	10	NaN			Col-0	20	187.804	Col-0	27	585.694	56.8414			phyb	28	139.332	phyb	35	280.977	20.235
35S::PIF4	10	3.02955			Col-0	20	212.013	Col-0	27	622.186	58.5961			phyb	28	206.092	phyb	35	529.262	46.1671
35S::PIF4	10	3.99349			Col-0	20	147.511	Col-0	27	665.123	73.9445			phyb	28	173.51	phyb	35	383.926	30.0594
35S::PIF4	10	8.70306			Col-0	20	203.778	Col-0	27	714.973	73.0278			phyb	28	164.67	phyb	35	335.481	24.4016
35S::PIF4	10	11.7326			Col-0	20	206.257	Col-0	27	577.073	52.9738			phyb	28	150.926	phyb	35	140.158	-1.53838
35S::PIF4	10	7.35354			Col-0	20	184.004	Col-0	27	668.511	69.2153			phyb	28	189.181	phyb	35	485.416	42.3192
35S::PIF4	10	4.73711			Col-0	20	200.914	Col-0	27	743.396	77.4974			phyb	28	233.495	phyb	35	587.457	50.5659
35S::PIF4	10	13.4677			35S::PIF4	20	29.6345	35S::PIF4	27	71.5524	5.98827			phyb	28	204.219	phyb	35	403.095	28.4108
35S::PIF4	10	7.68403			35S::PIF4	20	53.5954	35S::PIF4	27	54.5869	0.141641			phyb	28	223.939	phyb	35	243.906	2.85249
35S::PIF4	10	4.10366			35S::PIF4	20	NaN	35S::PIF4	27	399.459	#VALUE!			phyb	28	250.846	phyb	35	364.041	16.1707
35S::PIF4	10	4.68203			35S::PIF4	20	30.2955	35S::PIF4	27	93.5854	9.04143			pif4	28	1518.57	pif4	35	2283.53	109.28
35S::PIF4	10	4.87482			35S::PIF4	20	9.36405	35S::PIF4	27	222.947	30.5119			pif4	28	1291.5	pif4	35	1827.23	76.5334
35S::PIF4	10	NaN			35S::PIF4	20	34.4542	35S::PIF4	27	139.579	15.0179			pif4	28	1142.22	pif4	35	2134.59	141.767
35S::PIF4	10	4.81973			35S::PIF4	20	68.3576	35S::PIF4	27	177.917	15.6513			pif4	28	1171.33	pif4	35	1703.54	76.0298
35S::PIF4	10	7.60141			35S::PIF4	20	31.7001	35S::PIF4	27	185.573	21.9819			pif4	28	1264.64	pif4	35	3504.39	319.963
35S::PIF4	10	2.83676			35S::PIF4	20	43.5428	35S::PIF4	27	193.478	21.4193			pif4	28	1210.39	pif4	35	2944.83	247.778
35S::PIF4	10	5.61843			35S::PIF4	20	61.5549	35S::PIF4	27	107.659	6.58631			pif4	28	1115.84	pif4	35	2361.26	177.917
35S::PIF4	10	6.25188			35S::PIF4	20	NaN	35S::PIF4	27	59.3516	#VALUE!			pif4	28	1362.33	pif4	35	2669.83	186.785
35S::PIF4	10	6.77517			35S::PIF4	20	14.8723	35S::PIF4	27	311.906	42.4333			pif4	28	1478.12	pif4	35	2017.51	77.0567
35S::PIF4	10	2.94692			35S::PIF4	20	10.1352	35S::PIF4	27	393.758	54.8033			pif4	28	1278.74	pif4	35	1776.8	71.1511
35S::PIF4	10	3.99349			35S::PIF4	20	28.5328	35S::PIF4	27	258.641	32.8725			pif4	28	1019.97	pif4	35	2031.61	144.521
35S::PIF4	10	7.57387			35S::PIF4	20	26.0266	35S::PIF4	27	61.004	4.99678			pif4	28	1566.88	pif4	35	2479.44	130.365
35S::PIF4	10	11.4297			35S::PIF4	20	30.1027	35S::PIF4	27	120.962	12.9798			pif4	28	1086.73	pif4	35	1609.65	74.7039
35S::PIF4	10	10.1903			35S::PIF4	20	102.013	35S::PIF4	27	200.776	14.109			pif4	28	1051.06	pif4	35	1891.7	120.092
35S::PIF4	10	4.10366			35S::PIF4	20	16.3871	35S::PIF4	27	180.093	23.3865			pif4	28	1103.11	pif4	35	1897.93	113.545
35S::PIF4	10	12.2008			35S::PIF4	20	90.1428	35S::PIF4	27	54.284	-5.12269			pif4	28	1063.01	pif4	35	2271.94	172.704
35S::PIF4	10	6.88533			35S::PIF4	20	87.9946	35S::PIF4	27	199.289	15.8992			pif4	28	1465.2	pif4	35	2340.9	125.101
phyb	10	10.989			35S::PIF4	20	65.631	35S::PIF4	27	199.206	19.0822			pif4	28	1184.88	pif4	35	1659.39	67.7871
phyb	10	10.989			35S::PIF4	20	46.5173	35S::PIF4	27	55.7987	1.32592			pifq	28	1311.16	pifq	35	1788.2	68.1491
phyb	10	11.2644			35S::PIF4	20	49.5193	35S::PIF4	27	135.834	12.3306			pifq	28	1177.67	pifq	35	2417.66	177.142
phyb	10	9.88734			35S::PIF4	20	59.8198	35S::PIF4	27	42.4412	-2.48265			pifq	28	367.291	pifq	35	2011.37	234.869
phyb	10	11.1818			35S::PIF4	20	108.954	35S::PIF4	27	134.677	3.6748			pifq	28	856.811	pifq	35	1848.57	141.68
phyb	10	8.86831			35S::PIF4	20	39.9349	35S::PIF4	27	69.1563	4.17448			pifq	28	773.168	pifq	35	1691.45	131.183
phyb	10	11.9254			35S::PIF4	20	89.0136	35S::PIF4	27	259.632	24.3741			pifq	28	938.113	pifq	35	932.742	-0.767223
phyb	10	11.3195			35S::PIF4	20	95.954	35S::PIF4	27	409.182	44.7468			pifq	28	1012.39	pifq	35	905.476	-15.2736
phyb	10	8.34502			35S::PIF4	20	62.2985	35S::PIF4	27	134.815	10.3595			pifq	28	236.663	pifq	35	1598.25	194.513
phyb	10	14.1012			35S::PIF4	20	76.8679	35S::PIF4	27	202.897	18.0042			pifq	28	389.627	pifq	35	720.619	47.2845
phyb	10	14.5418			35S::PIF4	20	50.3456	35S::PIF4	27	159.822	15.6395			pifq	28	822.604	pifq	35	1426.28	86.2398
phyb	10	11.6224			35S::PIF4	20	59.2965	35S::PIF4	27	70.8363	1.64855			pifq	28	375.664	pifq	35	1645.65	181.427
phyb	10	15.0926			35S::PIF4	20	52.0256	35S::PIF4	27	306.067	36.2916			pifq	28	1072.84	pifq	35	2151.03	154.027
phyb	10	15.5884			35S::PIF4	20	55.1928	35S::PIF4	27	361.48	43.7553			pifq	28	575.531	pifq	35	1778.4	171.838
phyb	10	3.08463			35S::PIF4	20	177.476	35S::PIF4	27	95.4858	-11.7129			pifq	28	907.927	pifq	35	1581.89	96.2806
phyb	10	13.6054			35S::PIF4	20	47.619	35S::PIF4	27	180.23	18.9445			pifq	28	1049.74	pifq	35	1698.47	92.6766
phyb	10	10.686			35S::PIF4	20	79.4292	35S::PIF4	27	52.9895	-3.7771			pifq	28	1022.58	pifq	35	1849.7	118.16
phyb	10	10.9339			35S::PIF4	20	61.8303	35S::PIF4	27	188.41	18.0829			pifq	28	966.535	pifq	35	1442.5	67.9956
phyb	10	9.88734			35S::PIF4	20	77.5288	35S::PIF4	27	197.692	17.1661			pif3	28	712.99	pif3	35	1101.85	55.5509
phyb	10	10.1352			35S::PIF4	20	43.2399	35S::PIF4	27	51.4472	1.17247			pif3	28	588.971	pif3	35	1073.26	69.1838
phyb	10	12.669			35S::PIF4	20	46.3245	35S::PIF4	27	132.088	12.252			pif3	28	487.729	pif3	35	757.855	38.5893
phyb	10	10.8788			35S::PIF4	20	48.7206	35S::PIF4	27	39.4116	-1.32985			pif3	28	940.729	pif3	35	1387.5	63.8251
phyb	10	11.4847			35S::PIF4	20	88.4628	35S::PIF4	27	154.121	9.37979			pif3	28	802.417	pif3	35	1189.87	55.3502
phyb	10	14.2664			35S::PIF4	20	40.1002	35S::PIF4	27	71.938	4.54825			pif3	28	498.195	pif3	35	1067.47	81.3256
phyb	10	11.7601			35S::PIF4	20	87.7742	35S::PIF4	27	261.835	24.8659			pif3	28	311.988	pif3	35	1249.55	133.937
phyb	10	10.9614			35S::PIF4	20	83.5879	35S::PIF4	27	404.307	45.817			pif3	28	430.03	pif3	35	732.269	43.1769
phyb	10	12.0631			35S::PIF4	20	73.2875	35S::PIF4	27	134.457	8.73847			pif3	28	399.459	pif3	35	858.27	65.5444
phyb	10	12.7241			35S::PIF4	20	76.0967	35S::PIF4	27	207.662	18.795			pif3	28	510.038	pif3	35	690.406	25.7669
phyb	10	11.8979			35S::PIF4	20	54.2564	35S::PIF4	27	150.348	13.7274			pif3	28	377.812	pif3	35	1808.39	204.368
phyb	10	12.972			35S::PIF4	20	62.8493	35S::PIF4	27	66.5949	0.535089			pif3	28	658.431	pif3	35	1494.94	119.502
phyb	10	15.313			35S::PIF4	20	42.0005	35S::PIF4	27	314.302	38.9002			pif3	28	674.79	pif3	35	1062.24	55.3502
phyb	10	14.4867			35S::PIF4	20	45.9389	35S::PIF4	27	378.831	47.556			pif3	28	688.643	pif3	35	1600.45	130.259
phyb	10	11.6224			35S::PIF4	20	150.155	35S::PIF4	27	125.478	-3.52529			pif3	28	548.431	pif3	35	806.989	36.9369
phyb	10	6.58238			35S::PIF4	20	39.329	35S::PIF4	27	173.207	19.1255			pif3	28	626.813	pif3	35	1376.82	107.144
phyb	10	10.1077			phyb	20	16.1943	phyb	27	230.686	30.6417			pif3	28	636.067	pif3	35	962.404	46.6196
pif4	10	14.3215			phyb	20	61.004	phyb	27	180.699	17.0992			pif3	28	757.414	pif3	35	1119.72	51.758
pif4	10	16.1392			phyb	20	53.5403	phyb	27	159.877	15.191			pif7-1	28	1356.69	pif7-1	35	1984.99	89.7572
pif4	10	11.5674			phyb	20	31.5348	phyb	27	236.635	29.3			pif7-1	28	606.598	pif7-1	35	2551.81	277.888
pif4	10	22.9144			phyb	20	7.65649	phyb	27	120.135	16.0684			pif7-1	28	1352.17	pif7-1	35	1449.28	13.873
pif4	10	16.7727			phyb	20	78.658	phyb	27	201.465	17.5438			pif7-1	28	1455.94	pif7-1	35	2016.41	80.0666
pif4	10	10.4932			phyb	20	52.4662	phyb	27	167.534	16.4382			pif7-1	28	1215.62	pif7-1	35	2062.9	121.04
pif4	10	12.3936			phyb	20	74.4442	phyb	27	156.38	11.7051			pif7-1	28	1874.63	pif7-1	35	2091.24	30.9447
pif4	10	22.7491			phyb	20	5.75614	phyb	27	163.623	22.5524			pif7-1	28	1643.25	pif7-1	35	2230.68	83.9184
pif4	10	11.0165			phyb	20	53.1548	phyb	27	144.84	13.0979			pif7-1	28	2019.5	pif7-1	35	2769.8	107.187
pif4	10	16.4146			phyb	20	40.0176	phyb	27	153.543	16.2179			pif7-1	28	1324.57	pif7-1	35	2654.27	189.956
pif4	10	13.9635			phyb	20	61.2795	phyb	27	169.297	15.431			pif7-1	28	1438.54	pif7-1	35	2905.64	209.586
pif4	10	17.0205			phyb	20	63.3451	phyb	27	51.5849	-1.68002			pif7-1	28	1660.58	pif7-1	35	2668.84	144.037
pif4	10	20.9039			phyb	20	43.7081	phyb	27	69.8999	3.74169			pif7-1	28	1287.09	pif7-1	35	2141.72	122.091
pif4	10	12.8893			phyb	20	46.958	phyb	27	176.733	18.5392			pif7-1	28	1485.28	pif7-1	35	2191.33	100.864
pif4	10	18.6179			phyb	20	58.5529	phyb	27	184.251	17.9569			pif7-1	28	1464.62	pif7-1	35	2625.13	165.787
pif4	10	14.7346			phyb	20	52.9895	phyb	27	256.189	29.0286			pif7-1	28	1503.84	pif7-1	35	1995.31	70.2107
pif4	10	20.9865			phyb	20	62.4637	phyb	27	137.624	10.7372			pif7-1	28	1693.21	pif7-1	35	2490.01	113.828
pif4	10	14.9549			phyb	20	127.902	phyb	27	268.858	20.1366			pif7-1	28	1708.11	pif7-1	35	2431.35	103.319
pif4	10	14.7897			phyb	20	119.282	phyb	27	197.802	11.2172			pif7-1	28	1736.29	pif7-1	35	2388.16	93.1251
pif4	10	13.7982			phyb	20	99.617	phyb	27	124.872	3.60791			pif7-2	28	1559.72	pif7-2	35	2543.72	140.571
pif4	10	11.7051			phyb	20	118.235	phyb	27	224.407	15.1674			pif7-2	28	1543.03	pif7-2	35	2698.42	165.055
pif4	10	21.1793			phyb	20	103.5	phyb	27	153.873	7.19616			pif7-2	28	1741.33	pif7-2	35	2269.49	75.4514
pif4	10	16.635			phyb	20	106.337	phyb	27	56.6525	-7.09779			pif7-2	28	1915.33	pif7-2	35	2313.91	56.9397
pif4	10	10.6034			phyb	20	47.674	phyb	27	77.3636	4.24136			pif7-2	28	824.037	pif7-2	35	2626.89	257.551
pif4	10	12.2834			phyb	20	67.0356	phyb	27	132.006	9.28143			pif7-2	28	1136.36	pif7-2	35	3327.1	312.964
pif4	10	19.8022			phyb	20	107.411	phyb	27	177.669	10.0368			pif7-2	28	1661.73	pif7-2	35	2824.89	166.165
pif4	10	11.4297			phyb	20	102.316	phyb	27	155.746	7.63288			pif7-2	28	1681.78	pif7-2	35	2878.07	170.898
pif4	10	19.1963			phyb	20	65.3831	phyb	27	168.691	14.7582			pif7-2	28	761.931	pif7-2	35	1791.26	147.047
pif4	10	14.9549			phyb	20	141.149	phyb	27	137.624	-0.503613			pif7-2	28	1130.46	pif7-2	35	2213.36	154.7
pif4	10	17.296			phyb	20	109.256	phyb	27	168.222	8.42371			pif7-2	28	1334.79	pif7-2	35	2682.47	192.526
pif4	10	21.4822			phyb	20	116.5	phyb	27	227.188	15.8127			pif7-2	28	1370.1	pif7-2	35	1888.98	74.1255
pif4	10	13.5228			phyb	20	90.0051	phyb	27	203.007	16.1432			pif7-2	28	1648.27	pif7-2	35	1916.33	38.2943
pif4	10	18.5904			phyb	20	66.4297	phyb	27	182.985	16.6507			pif7-2	28	1285.38	pif7-2	35	2338.81	150.49
pif4	10	15.6159			phyb	20	39.6044	phyb	27	253.821	30.6024			pif7-2	28	1486.43	pif7-2	35	2783.27	185.263
pif4	10	21.0691			phyb	20	74.8298	phyb	27	262.001	26.7387			pif7-2	28	1799.77	pif7-2	35	2916.43	159.523
pif4	10	14.0185			phyb	20	97.4963	phyb	27	201.052	14.7936			pif7-2	28	1721.47	pif7-2	35	2249.44	75.4239
pifq	10	4.73711			phyb	20	80.2004	phyb	27	128.563	6.90894			pif3pif7	28	783.964	pif3pif7	35	1906.44	160.353
pifq	10	11.1542			phyb	20	87.4988	phyb	27	226.5	19.8573			pif3pif7	28	1352.5	pif3pif7	35	2381.99	147.071
pifq	10	12.1182			phyb	20	103.225	phyb	27	174.199	10.1391			pif3pif7	28	1280.59	pif3pif7	35	1857.97	82.4823
pifq	10	10.5208			phyb	20	103.693	phyb	27	159.327	7.94764			pif3pif7	28	1670.16	pif3pif7	35	2707.84	148.239
pifq	10	11.2093			phyb	20	74.279	phyb	27	58.3325	-2.27806			pif3pif7	28	1228.32	pif3pif7	35	2774.1	220.826
pifq	10	7.07812			phyb	20	54.2013	phyb	27	75.7937	3.08463			pif3pif7	28	1322.42	pif3pif7	35	2591.75	181.332
pifq	10	13.6605			phyb	20	56.6801	phyb	27	134.732	11.1503			pif3pif7	28	1491.2	pif3pif7	35	2042.24	78.721
pifq	10	4.73711			phyb	20	110.578	phyb	27	181.635	10.1509			pif3pif7	28	1477.95	pif3pif7	35	2109.36	90.2018
pifq	10	3.663			phyb	20	108.045	phyb	27	161.668	7.66042			pif3pif7	28	1428.38	pif3pif7	35	2342.91	130.648
pifq	10	8.34502			phyb	20	78.0246	phyb	27	167.424	12.7713			pif3pif7	28	1617.31	pif3pif7	35	1290.28	-46.718
pifq	10	4.84727			phyb	20	158.776	phyb	27	139.882	-2.69905			pif3pif7	28	1247.62	pif3pif7	35	2574.23	189.516
pifq	10	7.90436			phyb	20	99.314	phyb	27	175.356	10.8631			pif3pif7	28	1135.01	pif3pif7	35	2684.7	221.385
pifq	10	9.58438			phyb	20	107.742	phyb	27	235.286	18.2206			pif3pif7	28	1744.8	pif3pif7	35	2454.37	101.368
pifq	10	10.3831			phyb	20	58.6906	phyb	27	194.332	19.3773			pif3pif7	28	1569.36	pif3pif7	35	2616.34	149.569
pifq	10	15.0926			pif4	20	337.216	pif4	27	1345.06	143.978			pif3pif7	28	1606.73	pif3pif7	35	2978.62	195.984
pifq	10	5.64597			pif4	20	277.534	pif4	27	1036.24	108.387			pif3pif7	28	1784.73	pif3pif7	35	2146.96	51.7462
pifq	10	4.4617			pif4	20	435.594	pif4	27	1010.99	82.1991			pif3pif7	28	1169.4	pif3pif7	35	2182.02	144.659
pifq	10	4.1312			pif4	20	232.945	pif4	27	1420.77	169.69			pif3pif7	28	1117.35	pif3pif7	35	2535.81	202.637
pifq	10	10.4932			pif4	20	287.173	pif4	27	1349.86	151.812
pifq	10	14.5418			pif4	20	317.001	pif4	27	1058.3	105.9
pifq	10	11.4297			pif4	20	365.308	pif4	27	1188	117.527
pifq	10	11.7326			pif4	20	270.263	pif4	27	1086.73	116.638
pifq	10	8.7306			pif4	20	233.688	pif4	27	1117.02	126.19
pifq	10	13.3025			pif4	20	242.639	pif4	27	1167.59	132.135
pifq	10	5.3981			pif4	20	312.98	pif4	27	1196.45	126.21
pifq	10	6.94042			pif4	20	184.527	pif4	27	948.22	109.099
pifq	10	8.67552			pif4	20	313.531	pif4	27	1193.42	125.699
pifq	10	5.61843			pif4	20	221.46	pif4	27	994.628	110.453
pifq	10	8.31748			pif4	20	190.311	pif4	27	1014.26	117.708
pifq	10	12.0631			pif4	20	281.996	pif4	27	884.517	86.0745
pifq	10	11.7877			pif4	20	366.107	pif4	27	1052.66	98.0786
pifq	10	14.4867			pif4	20	357.404	pif4	27	966.783	87.0542
pifq	10	6.94042			pif4	20	373.157	pif4	27	1267.75	127.8
pifq	10	9.88734			pif4	20	307.058	pif4	27	1374.45	152.485
pif3	10	19.5268			pif4	20	487.592	pif4	27	1480.48	141.842
pif3	10	5.48072			pif4	20	271.668	pif4	27	1219.94	135.468
pif3	10	13.5779			pif4	20	325.649	pif4	27	1006.77	97.3035
pif3	10	16.3596			pif4	20	354.622	pif4	27	1042.88	98.3225
pif3	10	15.2304			pif4	20	419.262	pif4	27	1061.36	91.7284
pif3	10	14.1287			pif4	20	302.459	pif4	27	1212.29	129.975
pif3	10	12.1182			pif4	20	263.846	pif4	27	908.286	92.0628
pif3	10	21.7577			pif4	20	287.807	pif4	27	1155.55	123.964
pif3	10	12.7516			pif4	20	352.364	pif4	27	1452.5	157.163
pif3	10	4.81973			pif4	20	217.879	pif4	27	1240.93	146.15
pif3	10	9.77717			pif4	20	353.603	pif4	27	1004.79	93.0267
pif3	10	15.4231			pif4	20	247.569	pif4	27	1418.98	167.345
pif3	10	13.5503			pif4	20	224.021	pif4	27	1096.12	124.585
pif3	10	23.7131			pif4	20	311.74	pif4	27	892.119	82.9112
pif3	10	12.8618			pif4	20	398.551	pif4	27	1048.06	92.7867
pif3	10	19.7471			pif4	20	401.635	pif4	27	1026.08	89.2064
pif3	10	5.64597			pif4	20	362.389	pif4	27	1334.35	138.852
pif3	10	14.7346			pif4	20	293.398	pif4	27	1074.83	111.633
pif3	10	19.6645			pif4	20	462.557	pif4	27	1499.65	148.157
pif3	10	9.11618			pif4	20	271.392	pif4	27	1222.17	135.826
pif3	10	12.8618			pif4	20	313.586	pif4	27	1006.14	98.9363
pif3	10	14.8723			pif4	20	357.845	pif4	27	1046.52	98.3816
pif3	10	17.1582			pif4	20	425.1	pif4	27	1077.53	93.2038
pif3	10	13.5228			pif4	20	332.396	pif4	27	1214.68	126.041
pif3	10	12.5313			pif4	20	244.87	pif4	27	911.701	95.2615
pif3	10	19.2789			pif4	20	295.023	pif4	27	1151.78	122.394
pif3	10	13.2198			pif4	20	355.366	pif4	27	1450.9	156.506
pif3	10	8.01453			pif4	20	205.1	pif4	27	1240.19	147.869
pif3	10	9.47422			pif4	20	348.205	pif4	27	1037.48	98.4681
pif3	10	15.1202			pif4	20	238.04	pif4	27	1386.1	164.009
pif3	10	14.5143			pif4	20	215.566	pif4	27	1094.52	125.565
pif3	10	21.317			pif4	20	300.063	pif4	27	879.643	82.7971
pif3	10	11.3746			pif4	20	361.7	pif4	27	1055.33	99.0898
pif3	10	17.1582			pif4	20	398.413	pif4	27	1014.02	87.9434
pif3	10	15.974			pifq	20	154.176	pifq	27	921.781	109.658
pif3	10	14.1012			pifq	20	79.2915				-11.3274
pif7-1	10	15.6159			pifq	20	269.409	pifq	27	767.549	71.1629
pif7-1	10	20.9039			pifq	20	188.603	pifq	27	896.498	101.128
pif7-1	10	15.7261			pifq	20	63.5378	pifq	27	863.2	114.238
pif7-1	10	14.9549			pifq	20	38.8608	pifq	27	900.574	123.102
pif7-1	10	29.1938			pifq	20	163.623	pifq	27	309.399	20.8252
pif7-1	10	4.5994			pifq	20	45.2504	pifq	27	1166.1	160.121
pif7-1	10	11.8152			pifq	20	202.181	pifq	27	269.519	9.61979
pif7-1	10	23.4652			pifq	20	46.5448	pifq	27	928.253	125.958
pif7-1	10	8.7306			pifq	20	104.877	pifq	27	301.22	28.0489
pif7-1	10	25.7236			pifq	20	137.624	pifq	27	684.705	78.1544
pif7-1	10	14.1287			pifq	20	203.062	pifq	27	1012.92	115.693
pif7-1	10	23.0246			pifq	20	177.945	pifq	27	981.132	114.741
pif7-1	10	14.2664			pifq	20	223.746	pifq	27	652.179	61.2047
pif7-1	10	23.0796			pifq	20	244.87	pifq	27	195.681	-7.02697
pif7-1	10	23.658			pifq	20	127.379	pifq	27	726.348	85.567
pif7-1	10	19.0586			pifq	20	179.267	pifq	27	739.43	80.0233
pif7-1	10	19.6645			pifq	20	92.594	pifq	27	463.576	52.9974
pif7-1	10	20.959			pifq	20	302.679	pifq	27	1245.72	134.72
pif7-1	10	17.2684			pifq	20	219.284	pifq	27	1016.16	113.84
pif7-1	10	23.8783			pifq	20	72.654	pifq	27	305.075	33.203
pif7-1	10	17.1858			pifq	20	46.297	pifq	27	739.815	99.074
pif7-1	10	18.976			pifq	20	185.766	pifq	27	660.827	67.8658
pif7-1	10	26.2469			pifq	20	53.8158	pifq	27	793.245	105.633
pif7-1	10	5.12269			pifq	20	232.669	pifq	27	1042.47	115.685
pif7-1	10	12.9444			pifq	20	60.3981	pifq	27	190.283	18.555
pif7-1	10	15.6435			pifq	20	126.194	pifq	27	327.163	28.7099
pif7-1	10	10.7687			pifq	20	168.305	pifq	27	720.426	78.8744
pif7-1	10	28.4777			pifq	20	233.11	pifq	27	308.05	10.7057
pif7-1	10	17.6815			pifq	20	214.327	pifq	27	935.799	103.068
pif7-1	10	21.5924			pifq	20	250.185	pifq	27	475.446	32.1801
pif7-1	10	16.3045			pifq	20	277.093	pifq	27	751.272	67.7399
pif7-1	10	24.8698			pifq	20	147.787	pifq	27	923.819	110.862
pif7-1	10	24.5118			pifq	20	178.523	pifq	27	868.378	98.5507
pif7-1	10	21.5924			pifq	20	92.1257	pifq	27	920.101	118.282
pif7-1	10	16.2494			pifq	20	305.241	pifq	27	1190.06	126.403
pif7-1	10	20.7111			pifq	20	210.223	pifq	27	1022.8	116.083
pif7-2	10	16.5799			pifq	20	81.1643	pifq	27	305.957	32.1132
pif7-2	10	17.7917			pifq	20	49.5469	pifq	27	734.169	97.8032
pif7-2	10	17.9845			pifq	20	3.05709	pifq	27	661.019	93.9946
pif7-2	10	6.41713			pifq	20	199.014	pifq	27	767.549	81.2194
pif7-2	10	13.33			pifq	20	52.659	pifq	27	1046.93	142.039
pif7-2	10	13.633			pifq	20	239.224	pifq	27	188.328	-7.27091
pif7-2	10	12.7792			pifq	20	65.7687	pifq	27	327.549	37.3972
pif7-2	10	19.3065			pifq	20	140.846	pifq	27	724.723	83.4109
pif7-2	10	25.3105			pifq	20	177.917	pifq	27	311.024	19.0153
pif7-2	10	12.669			pifq	20	236.938	pifq	27	945.356	101.203
pif7-2	10	24.8698			pifq	20	219.009	pifq	27	479.687	37.2398
pif7-2	10	5.75614			pifq	20	260.844	pifq	27	751.658	70.1163
pif7-2	10	6.94042			pifq	20	281.5	pifq	27	887.134	86.5191
pif7-2	10	15.7261			pifq	20	146.658	pifq	27	870.719	103.437
pif7-2	10	11.5949			pif3	20	157.316				-22.4737
pif7-2	10	27.3485			pif3	20	155.746	pif3	27	835.769	97.1461
pif7-2	10	18.4527			pif3	20	178.716	pif3	27	729.597	78.6974
pif7-2	10	17.4337			pif3	20	215.786	pif3	27	543.115	46.7612
pif7-2	10	19.7196			pif3	20	175.769	pif3	27	431.545	36.5395
pif7-2	10	21.2619			pif3	20	170.811	pif3	27	607.204	62.3418
pif7-2	10	6.5273			pif3	20	164.615	pif3	27	611.032	63.7739
pif7-2	10	14.5969			pif3	20	268.886	pif3	27	276.432	1.07805
pif7-2	10	14.349			pif3	20	152.524	pif3	27	612.464	65.7057
pif7-2	10	10.4382			pif3	20	178.247	pif3	27	692.912	73.5235
pif7-2	10	21.4547			pif3	20	88.0772	pif3	27	333.801	35.1034
pif7-2	10	28.8358			pif3	20	198.738	pif3	27	480.045	40.1867
pif7-2	10	13.1923			pif3	20	158.115	pif3	27	393.373	33.6083
pif7-2	10	26.0541			pif3	20	87.3336	pif3	27	381.998	42.095
pif7-2	10	7.40862			pif3	20	155.581	pif3	27	763.198	86.8024
pif7-2	10	6.77517			pif3	20	126.387	pif3	27	494.202	52.5449
pif7-2	10	17.6265			pif3	20	157.536	pif3	27	707.73	78.599
pif7-2	10	12.9169			pif3	20	193.891	pif3	27	475.088	40.171
pif7-2	10	30.2404			pif3	20	191.825	pif3	27	586.438	56.3732
pif7-2	10	20.6009			pif3	20	186.565	pif3	27	680.078	70.5019
pif3pif7	10	16.4697			pif3	20	228.676	pif3	27	555.922	46.7494
pif3pif7	10	NaN			pif3	20	245.999	pif3	27	450.411	29.2017
pif3pif7	10	15.6986			pif3	20	213.308	pif3	27	896.195	97.5553
pif3pif7	10	13.4402			pif3	20	211.297	pif3	27	796.743	83.6352
pif3pif7	10	6.11418			pif3	20	208.818	pif3	27	512.709	43.413
pif3pif7	10	15.2028			pif3	20	316.78	pif3	27	416.012	14.1759
pif3pif7	10	17.4061			pif3	20	187.556	pif3	27	344.873	22.4737
pif3pif7	10	15.8913			pif3	20	204.935	pif3	27	487.399	40.352
pif3pif7	10	15.5333			pif3	20	100.333	pif3	27	441.047	48.6734
pif3pif7	10	21.5924			pif3	20	236.442	pif3	27	580.764	49.1888
pif3pif7	10	25.6134			pif3	20	185.546	pif3	27	617.78	61.7477
pif3pif7	10	16.8553			pif3	20	110.826	pif3	27	639.702	75.5537
pif3pif7	10	16.1943			pif3	20	188.686	pif3	27	529.702	48.7167
pif3pif7	10	15.0926			pif3	20	146.74	pif3	27	610.261	66.2172
pif3pif7	10	26.7426			pif3	20	184.72	pif3	27	587.76	57.5771
pif3pif7	10	19.995			pif3	20	237.709	pif3	27	702.414	66.3864
pif3pif7	10	23.658			pif3	20	154.865	pif3	27	685.394	75.7898
pif3pif7	10	26.1367			pif3	20	156.655	pif3	27	588.586	61.7044
pif3pif7	10	18.7281			pif3	20	212.206	pif3	27	449.585	33.9112
pif3pif7	10	NaN			pif3	20	209.369	pif3	27	879.863	95.7848
pif3pif7	10	16.332			pif3	20	188.3	pif3	27	782.311	84.8588
pif3pif7	10	15.6986			pif3	20	174.805	pif3	27	516.923	48.8741
pif3pif7	10	6.88533			pif3	20	197.361	pif3	27	284.529	12.4526
pif3pif7	10	16.9655			pif3	20	278.223	pif3	27	408.879	18.6652
pif3pif7	10	19.995			pif3	20	174.226	pif3	27	348.288	24.8659
pif3pif7	10	17.5989			pif3	20	169.297	pif3	27	488.363	45.5809
pif3pif7	10	17.296			pif3	20	99.5344	pif3	27	439.532	48.5711
pif3pif7	10	25.0351			pif3	20	223.939	pif3	27	598.335	53.4853
pif3pif7	10	30.02			pif3	20	173.125	pif3	27	630.559	65.3477
pif3pif7	10	15.9464			pif3	20	81.5774	pif3	27	591.588	72.8586
pif3pif7	10	18.5353			pif3	20	171.803	pif3	27	529.234	51.0616
pif3pif7	10	13.33			pif3	20	136.55	pif3	27	617.064	68.6448
pif3pif7	10	28.3951			pif3	20	153.212	pif3	27	589.88	62.3811
pif3pif7	10	22.2259			pif3	20	205.21	pif3	27	724.998	74.2554
pif3pif7	10	25.5033			pif7-1	20	315.596	pif7-1	27	1648.6	190.429
pif3pif7	10	29.2489			pif7-1	20	474.014	pif7-1	27	462.088	-1.70363
Col-0	11	26.2469			pif7-1	20	325.841	pif7-1	27	1291.14	137.899
Col-0	11	25.338			pif7-1	20	444.352	pif7-1	27	1364.84	131.498
Col-0	11	18.8934			pif7-1	20	466.137	pif7-1	27	1178.14	101.714
Col-0	11	24.016			pif7-1	20	536.257	pif7-1	27	1309.12	110.409
Col-0	11	22.1983			pif7-1	20	62.7667	pif7-1	27	1659.64	228.125
Col-0	11	23.9334			pif7-1	20	299.953	pif7-1	27	1379.44	154.212
Col-0	11	16.8828			pif7-1	20	399.9	pif7-1	27	1310.72	130.117
Col-0	11	31.2594			pif7-1	20	236.938	pif7-1	27	1333.47	156.647
Col-0	11	27.7066			pif7-1	20	554.435	pif7-1	27	1538.4	140.567
Col-0	11	20.959			pif7-1	20	388.773	pif7-1	27	1383.73	142.137
Col-0	11	21.3996			pif7-1	20	313.999	pif7-1	27	1157.98	120.568
Col-0	11	25.8613			pif7-1	20	279.737	pif7-1	27	1527.5	178.251
Col-0	11	23.2449			pif7-1	20	312.264	pif7-1	27	1755.68	206.202
Col-0	11	20.7662			pif7-1	20	476.079	pif7-1	27	1521.38	149.329
Col-0	11	22.3911			pif7-1	20	365.969	pif7-1	27	1930.29	223.474
Col-0	11	36.1067			pif7-1	20	332.754	pif7-1	27	1389.35	150.942
Col-0	11	22.0331			pif7-1	20	348.15	pif7-1	27	1329.39	140.178
Col-0	11	19.7471			pif7-1	20	525.296	pif7-1	27	510.423	-2.12462
Col-0	11	14.8723			pif7-1	20	367.842	pif7-1	27	1324.9	136.723
Col-0	11	14.4867			pif7-1	20	484.314	pif7-1	27	1388.63	129.189
Col-0	11	16.1668			pif7-1	20	513.646	pif7-1	27	1206.59	98.9914
Col-0	11	14.1562			pif7-1	20	589.853	pif7-1	27	1779.89	170.005
Col-0	11	17.0205			pif7-1	20	75.9314	pif7-1	27	1577.13	214.456
Col-0	11	10.8513			pif7-1	20	338.015	pif7-1	27	1983.66	235.093
Col-0	11	21.0691			pif7-1	20	444.49	pif7-1	27	1537.27	156.112
Col-0	11	16.2494			pif7-1	20	263.901	pif7-1	27	1192.76	132.694
Col-0	11	15.2854			pif7-1	20	609.682	pif7-1	27	1410.09	114.344
Col-0	11	15.1753			pif7-1	20	434.189	pif7-1	27	1393.98	137.113
Col-0	11	16.4422			pif7-1	20	350.271	pif7-1	27	1447.77	156.785
Col-0	11	9.55684			pif7-1	20	319.149	pif7-1	27	1654.9	190.822
Col-0	11	15.8638			pif7-1	20	355.889	pif7-1	27	1582.17	175.183
Col-0	11	14.2389			pif7-1	20	530.198	pif7-1	27	1693.96	166.251
Col-0	11	22.2809			pif7-1	20	419.069	pif7-1	27	1340.77	131.671
Col-0	11	10.631			pif7-1	20	376.297	pif7-1	27	511.277	19.2829
35S::PIF4	11	NaN			pif7-1	20	378.28	pif7-1	27	1342.86	137.797
35S::PIF4	11	8.40011			pif7-1	20	554.297	pif7-1	27	1372.22	116.846
35S::PIF4	11	NaN			pif7-1	20	402.406	pif7-1	27	1188.9	112.357
35S::PIF4	11	4.24136			pif7-1	20	523.12	pif7-1	27	1782.56	179.92
35S::PIF4	11	3.47021			pif7-1	20	570.188	pif7-1	27	1597.84	146.807
35S::PIF4	11	4.90236			pif7-1	20	624.858	pif7-1	27	1985.45	194.371
35S::PIF4	11	7.07812			pif7-1	20	85.5158	pif7-1	27	1336.61	178.727
35S::PIF4	11	4.07612			pif7-1	20	372.441	pif7-1	27	1387.73	145.041
35S::PIF4	11	4.21382			pif7-1	20	483.213	pif7-1	27	1547.74	152.075
35S::PIF4	11	2.89184			pif7-1	20	277.864	pif7-1	27	1193.12	130.75
35S::PIF4	11	NaN			pif7-1	20	636.783	pif7-1	27	1408.02	110.177
35S::PIF4	11	5.50827			pif7-1	20	470.241	pif7-1	27	1434.41	137.738
35S::PIF4	11	10.6034			pif7-1	20	377.179	pif7-1	27	1436.75	151.367
35S::PIF4	11	15.4507			pif7-1	20	339.392	pif7-1	27	1665.48	189.441
35S::PIF4	11	10.328			pif7-1	20	391.693	pif7-1	27	1601.67	172.853
35S::PIF4	11	4.18628			pif7-1	20	578.148	pif7-1	27	1681.73	157.654
35S::PIF4	11	9.08864			pif7-2	20	520.118	pif7-2	27	1607.81	155.384
35S::PIF4	11	8.51027			pif7-2	20	91.4923	pif7-2	27	1405.65	187.737
35S::PIF4	11	NaN			pif7-2	20	270.373	pif7-2	27	1686.74	202.338
35S::PIF4	11	NaN			pif7-2	20	280.178	pif7-2	27	1498.83	174.093
35S::PIF4	11	NaN			pif7-2	20	350.298	pif7-2	27	1396.24	149.42
35S::PIF4	11	NaN			pif7-2	20	587.264	pif7-2	27	1687.95	157.241
35S::PIF4	11	NaN			pif7-2	20	268.693	pif7-2	27	672.89	57.7424
35S::PIF4	11	NaN			pif7-2	20	439.863	pif7-2	27	1174.53	104.952
35S::PIF4	11	NaN			pif7-2	20	300.366	pif7-2	27	1576.77	182.343
35S::PIF4	11	NaN			pif7-2	20	444.6	pif7-2	27	1545.65	157.292
35S::PIF4	11	NaN			pif7-2	20	112.589	pif7-2	27	579.552	66.709
35S::PIF4	11	NaN			pif7-2	20	291.387	pif7-2	27	937.011	92.232
35S::PIF4	11	NaN			pif7-2	20	278.443	pif7-2	27	1230.41	135.995
35S::PIF4	11	NaN			pif7-2	20	370.211	pif7-2	27	1484.42	159.173
35S::PIF4	11	NaN			pif7-2	20	359.277	pif7-2	27	1341.98	140.386
35S::PIF4	11	NaN			pif7-2	20	445.619	pif7-2	27	1826.49	197.267
35S::PIF4	11	NaN			pif7-2	20	78.4377	pif7-2	27	1123.58	149.305
35S::PIF4	11	NaN			pif7-2	20	226.775	pif7-2	27	1551.71	189.276
35S::PIF4	11	NaN			pif7-2	20	242.832	pif7-2	27	1470.05	175.316
35S::PIF4	11	NaN			pif7-2	20	405.877	pif7-2	27	1738.68	190.401
phyb	11	15.8363			pif7-2	20	207.772	pif7-2	27	1866.53	236.966
phyb	11	14.4867			pif7-2	20	388.663	pif7-2	27	1595.72	172.436
phyb	11	16.5799			pif7-2	20	638.188	pif7-2	27	1607.81	138.517
phyb	11	15.7536			pif7-2	20	298.548	pif7-2	27	635.984	48.2052
phyb	11	15.5058			pif7-2	20	489.602	pif7-2	27	1019.17	75.6521
phyb	11	20.1052			pif7-2	20	331.625	pif7-2	27	1264.45	133.261
phyb	11	8.23486			pif7-2	20	488.776	pif7-2	27	1386.32	128.221
phyb	11	12.8343			pif7-2	20	129.499	pif7-2	27	1550.3	202.972
phyb	11	3.36004			pif7-2	20	323.996	pif7-2	27	1139.77	116.539
phyb	11	20.7386			pif7-2	20	307.857	pif7-2	27	1451.21	163.336
phyb	11	12.0906			pif7-2	20	408.658	pif7-2	27	1798.2	198.506
phyb	11	19.2789			pif7-2	20	403.095	pif7-2	27	1644	177.272
phyb	11	22.0606			pif7-2	20	496.928	pif7-2	27	1540.77	149.121
phyb	11	19.6645			pif7-2	20	91.7126	pif7-2	27	1447.65	193.706
phyb	11	2.94692			pif7-2	20	258.53	pif7-2	27	1748.74	212.887
phyb	11	11.4021			pif7-2	20	274.174	pif7-2	27	1857.5	226.189
phyb	11	7.57387			pif7-2	20	432.95	pif7-2	27	731.36	42.63
phyb	11	14.294			pif7-2	20	222.451	pif7-2	27	1095.54	124.727
phyb	11	4.81973			pif7-2	20	420.556	pif7-2	27	1650.61	175.722
phyb	11	8.48273			pif7-2	20	687.514	pif7-2	27	1606.05	131.219
phyb	11	8.53781			pif7-2	20	315.651	pif7-2	27	636.342	45.813
phyb	11	4.57186			pif7-2	20	516.813	pif7-2	27	1005.4	69.7976
phyb	11	5.92139			pif7-2	20	357.955	pif7-2	27	1252.25	127.756
phyb	11	6.14172			pif7-2	20	505.273	pif7-2	27	1377.92	124.664
phyb	11	14.349			pif7-2	20	142.223	pif7-2	27	1547.91	200.812
phyb	11	15.2579			pif7-2	20	340.989	pif7-2	27	1131.18	112.884
pif4	11	22.5288			pif7-2	20	330.854	pif7-2	27	1466.44	162.226
pif4	11	24.8423			pif7-2	20	439.863	pif7-2	27	1768.48	189.803
pif4	11	16.7727			pif7-2	20	440.634	pif7-2	27	1654.79	173.451
pif4	11	35.5834			pif3pif7	20	290.974	pif3pif7	27	1125.64	119.238
pif4	11	28.3676			pif3pif7	20	412.955	pif3pif7	27	921.202	72.6068
pif4	11	15.7812			pif3pif7	20	175.163	pif3pif7	27	1209.01	147.692
pif4	11	18.4251			pif3pif7	20	421.41	pif3pif7	27	1579.36	165.421
pif4	11	30.8738			pif3pif7	20	357.569	pif3pif7	27	1664.49	186.703
pif4	11	15.8913			pif3pif7	20	172.409	pif3pif7	27	702.139	75.6757
pif4	11	23.9885			pif3pif7	20	519.402	pif3pif7	27	1283.1	109.099
pif4	11	19.9399			pif3pif7	20	555.674	pif3pif7	27	1158	86.047
pif4	11	26.1643			pif3pif7	20	319.837	pif3pif7	27	1160.1	120.037
pif4	11	32.306			pif3pif7	20	297.804	pif3pif7	27	1361.09	151.898
pif4	11	19.2238			pif3pif7	20	265.416	pif3pif7	27	1463.77	171.193
pif4	11	27.982			pif3pif7	20	254.344	pif3pif7	27	1382.85	161.215
pif4	11	22.1708			pif3pif7	20	341.292	pif3pif7	27	1140.02	114.104
pif4	11	30.984			pif3pif7	20	464.237	pif3pif7	27	1668.29	172.007
pif4	11	22.2534			pif3pif7	20	334.875	pif3pif7	27	1398.14	151.894
pif4	11	15.2854			pif3pif7	20	234.129	pif3pif7	27	1457.51	174.769
pif4	11	18.7556			pif3pif7	20	345.175	pif3pif7	27	1674.62	189.921
pif4	11	10.989			pif3pif7	20	150.899	pif3pif7	27	1098.46	135.366
pif4	11	28.4502			pif3pif7	20	345.12	pif3pif7	27	725.439	54.3312
pif4	11	20.0776			pif3pif7	20	301.385	pif3pif7	27	1290.59	141.315
pif4	11	13.991			pif3pif7	20	127.709	pif3pif7	27	1215.76	155.435
pif4	11	14.6795			pif3pif7	20	450.714	pif3pif7	27	1636.64	169.419
pif4	11	27.2108			pif3pif7	20	235.038	pif3pif7	27	1449.06	173.432
pif4	11	14.3766			pif3pif7	20	398.275	pif3pif7	27	1461.51	151.89
pif4	11	23.5754			pif3pif7	20	472.527	pif3pif7	27	1720.42	178.271
pif4	11	21.1517			pif3pif7	20	612.795	pif3pif7	27	1122.12	72.7603
pif4	11	23.4652			pif3pif7	20	359.855	pif3pif7	27	1129.19	109.906
pif4	11	22.4186			pif3pif7	20	334.572	pif3pif7	27	1647.08	187.501
pif4	11	15.671			pif3pif7	20	305.075	pif3pif7	27	1450.77	163.67
pif4	11	20.4357			pif3pif7	20	286.815	pif3pif7	27	1549.81	180.427
pif4	11	18.1773			pif3pif7	20	382.88	pif3pif7	27	1706.05	189.024
pif4	11	26.4672			pif3pif7	20	511.966	pif3pif7	27	1145.03	90.4379
pif4	11	16.1943			pif3pif7	20	366.162	pif3pif7	27	965.158	85.5709
pifq	11	3.13971			pif3pif7	20	264.424	pif3pif7	27	732.82	66.9136
pifq	11	14.4317			pif3pif7	20	383.127	pif3pif7	27	1317.85	133.532
pifq	11	19.5819			pif3pif7	20	169.379	pif3pif7	27	1222.28	150.415
pifq	11	15.8638			pif3pif7	20	385.634	pif3pif7	27	1642.54	179.558
pifq	11	16.2218			pif3pif7	20	330.854	pif3pif7	27	1160.89	118.577
pifq	11	10.5759			pif3pif7	20	154.094	pif3pif7	27	1190.75	148.094
pifq	11	19.8848			pif3pif7	20	492.439	pif3pif7	27	1356	123.365
pifq	11	7.87682			pif3pif7	20	261.367	pif3pif7	27	1461.65	171.468
pifq	11	8.48273			pif3pif7	20	422.126	pif3pif7	27	1423.78	143.093
pifq	11	12.1182			pif3pif7	20	509.212	pif3pif7	27	1719.18	172.853
pifq	11	10.7962			pif3pif7	20	660.496	pif3pif7	27	1111.84	64.4782
pifq	11	13.5779			pif3pif7	20	396.127	pif3pif7	27	1117.52	103.056
pifq	11	17.8468			pif3pif7	20	372.689	pif3pif7	27	1662.75	184.295
pifq	11	17.7917			pif3pif7	20	325.897	pif3pif7	27	1452.7	160.971
pifq	11	18.315			pif3pif7	20	306.067	pif3pif7	27	1552.12	178.007
pifq	11	8.23486			pif3pif7	20	417.444	pif3pif7	27	1715.94	185.499
pifq	11	13.9635			pif3pif7	20	547.384	pif3pif7	27	1158.39	87.2863
pifq	11	7.9319			pif3pif7	20	399.432	pif3pif7	27	970.97	81.6482
pifq	11	19.0861
pifq	11	13.7982
pifq	11	17.6265
pifq	11	11.7326
pifq	11	14.0185
pifq	11	7.43616
pifq	11	5.94893
pifq	11	9.74963
pifq	11	10.4382
pifq	11	12.2559
pifq	11	17.7091
pifq	11	15.01
pifq	11	13.8533
pifq	11	8.5929
pifq	11	17.1858
pif3	11	32.5263
pif3	11	23.8508
pif3	11	20.4632
pif3	11	25.1728
pif3	11	24.98
pif3	11	18.7832
pif3	11	17.9569
pif3	11	29.2489
pif3	11	18.3701
pif3	11	11.2919
pif3	11	11.5123
pif3	11	24.2364
pif3	11	21.7852
pif3	11	29.7997
pif3	11	17.4612
pif3	11	27.8167
pif3	11	19.1137
pif3	11	22.5013
pif3	11	19.6094
pif3	11	20.5734
pif3	11	14.1012
pif3	11	4.29645
pif3	11	12.3661
pif3	11	14.8999
pif3	11	12.7516
pif3	11	18.1222
pif3	11	16.5799
pif3	11	6.05909
pif3	11	9.17126
pif3	11	18.0396
pif3	11	11.4572
pif3	11	18.7556
pif3	11	4.4617
pif3	11	18.0671
pif3	11	20.6009
pif3	11	16.69
pif7-1	11	23.2449
pif7-1	11	31.2594
pif7-1	11	23.658
pif7-1	11	27.1282
pif7-1	11	41.1743
pif7-1	11	4.21382
pif7-1	11	20.353
pif7-1	11	29.5794
pif7-1	11	15.2854
pif7-1	11	37.4562
pif7-1	11	22.8318
pif7-1	11	31.8378
pif7-1	11	21.2894
pif7-1	11	33.0221
pif7-1	11	31.2043
pif7-1	11	30.681
pif7-1	11	25.8062
pif7-1	11	29.7997
pif7-1	11	20.4632
pif7-1	11	27.1282
pif7-1	11	17.9019
pif7-1	11	16.8828
pif7-1	11	35.3906
pif7-1	11	18.4527
pif7-1	11	22.336
pif7-1	11	9.77717
pif7-1	11	34.1788
pif7-1	11	22.9144
pif7-1	11	27.4587
pif7-1	11	20.9314
pif7-1	11	25.0075
pif7-1	11	29.1663
pif7-1	11	26.7151
pif7-1	11	18.4251
pif7-1	11	26.6325
pif7-2	11	24.0436
pif7-2	11	28.0646
pif7-2	11	28.4502
pif7-2	11	4.4617
pif7-2	11	17.3786
pif7-2	11	17.4612
pif7-2	11	15.7536
pif7-2	11	29.7446
pif7-2	11	40.1277
pif7-2	11	18.315
pif7-2	11	33.0221
pif7-2	11	10.6034
pif7-2	11	8.40011
pif7-2	11	24.8423
pif7-2	11	16.5248
pif7-2	11	41.2569
pif7-2	11	29.7446
pif7-2	11	21.8403
pif7-2	11	22.0606
pif7-2	11	30.8187
pif7-2	11	5.70106
pif7-2	11	18.2324
pif7-2	11	18.9209
pif7-2	11	17.9294
pif7-2	11	28.9735
pif7-2	11	40.4582
pif7-2	11	18.2048
pif7-2	11	27.9269
pif7-2	11	7.07812
pif7-2	11	7.49124
pif7-2	11	23.961
pif7-2	11	18.7832
pif7-2	11	40.1002
pif7-2	11	26.3295
pif3pif7	11	25.1452
pif3pif7	11	5.50827
pif3pif7	11	22.8593
pif3pif7	11	19.8573
pif3pif7	11	10.328
pif3pif7	11	22.8593
pif3pif7	11	25.9715
pif3pif7	11	25.7511
pif3pif7	11	23.9885
pif3pif7	11	32.4437
pif3pif7	11	37.291
pif3pif7	11	26.2469
pif3pif7	11	23.6855
pif3pif7	11	24.9249
pif3pif7	11	38.971
pif3pif7	11	29.6896
pif3pif7	11	33.0221
pif3pif7	11	36.4647
pif3pif7	11	24.8423
pif3pif7	11	NaN
pif3pif7	11	20.9865
pif3pif7	11	18.4802
pif3pif7	11	10.5759
pif3pif7	11	20.7662
pif3pif7	11	18.9209
pif3pif7	11	23.1623
pif3pif7	11	21.4547
pif3pif7	11	29.001
pif3pif7	11	32.7466
pif3pif7	11	23.1347
pif3pif7	11	22.1157
pif3pif7	11	23.0796
pif3pif7	11	36.4647
pif3pif7	11	26.1092
pif3pif7	11	29.9925
pif3pif7	11	35.4457
Col-0	12	36.4096
Col-0	12	35.666
Col-0	12	27.7341
Col-0	12	31.8929
Col-0	12	30.626
Col-0	12	32.6916
Col-0	12	22.5563
Col-0	12	42.0005
Col-0	12	38.1998
Col-0	12	28.3676
Col-0	12	27.8718
Col-0	12	33.5453
Col-0	12	32.3611
Col-0	12	29.3591
Col-0	12	28.2299
Col-0	12	45.2779
Col-0	12	31.1217
Col-0	12	22.4186
Col-0	12	23.4377
Col-0	12	20.2704
Col-0	12	25.2003
Col-0	12	21.5649
Col-0	12	30.2955
Col-0	12	19.1688
Col-0	12	29.5794
Col-0	12	24.3465
Col-0	12	22.2809
Col-0	12	22.0881
Col-0	12	24.5944
Col-0	12	22.4186
Col-0	12	22.8593
Col-0	12	23.9885
Col-0	12	33.7106
Col-0	12	21.5649
35S::PIF4	12	NaN
35S::PIF4	12	14.0185
35S::PIF4	12	6.83025
35S::PIF4	12	6.74763
35S::PIF4	12	3.91087
35S::PIF4	12	12.2834
35S::PIF4	12	8.42765
35S::PIF4	12	6.9955
35S::PIF4	12	6.30696
35S::PIF4	12	11.0441
35S::PIF4	12	6.11418
35S::PIF4	12	5.59089
35S::PIF4	12	11.5123
35S::PIF4	12	16.8278
35S::PIF4	12	22.8868
35S::PIF4	12	5.15023
35S::PIF4	12	16.0566
35S::PIF4	12	16.8002
35S::PIF4	12	3.08463
35S::PIF4	12	10.9339
35S::PIF4	12	9.88734
35S::PIF4	12	6.00401
35S::PIF4	12	7.9319
35S::PIF4	12	11.3746
35S::PIF4	12	13.3575
35S::PIF4	12	10.9614
35S::PIF4	12	10.631
35S::PIF4	12	9.91488
35S::PIF4	12	10.1352
35S::PIF4	12	6.27942
35S::PIF4	12	13.991
35S::PIF4	12	10.0526
35S::PIF4	12	13.9084
35S::PIF4	12	5.17777
35S::PIF4	12	14.349
35S::PIF4	12	14.5143
phyb	12	18.3425
phyb	12	20.9314
phyb	12	21.8954
phyb	12	20.3806
phyb	12	15.2854
phyb	12	17.296
phyb	12	16.5248
phyb	12	20.959
phyb	12	8.51027
phyb	12	24.7046
phyb	12	3.11217
phyb	12	26.7151
phyb	12	31.2319
phyb	12	26.8253
phyb	12	16.4973
phyb	12	21.2894
phyb	12	10.7962
phyb	12	19.4442
phyb	12	13.991
phyb	12	17.2133
phyb	12	19.4442
phyb	12	16.0566
phyb	12	18.3425
phyb	12	16.7176
phyb	12	16.9104
phyb	12	17.2409
phyb	12	18.4802
phyb	12	23.4928
phyb	12	10.4657
phyb	12	22.0606
phyb	12	21.8678
phyb	12	22.5563
phyb	12	17.1032
phyb	12	16.0015
phyb	12	4.54432
phyb	12	17.1582
pif4	12	30.2679
pif4	12	34.7021
pif4	12	22.9144
pif4	12	42.3035
pif4	12	38.6129
pif4	12	26.3295
pif4	12	24.8423
pif4	12	44.7547
pif4	12	23.2449
pif4	12	33.2148
pif4	12	29.7171
pif4	12	37.8418
pif4	12	44.2589
pif4	12	26.6875
pif4	12	37.9244
pif4	12	31.7001
pif4	12	41.6425
pif4	12	29.6069
pif4	12	33.9034
pif4	12	34.5644
pif4	12	18.976
pif4	12	44.8097
pif4	12	32.4712
pif4	12	26.3846
pif4	12	20.4907
pif4	12	48.3626
pif4	12	24.1262
pif4	12	40.4582
pif4	12	32.9394
pif4	12	40.2379
pif4	12	42.0281
pif4	12	26.4948
pif4	12	36.0516
pif4	12	33.9034
pif4	12	45.7737
pif4	12	32.0856
pifq	12	3.3325
pifq	12	18.2599
pifq	12	26.5498
pifq	12	21.8678
pifq	12	25.8338
pifq	12	17.6815
pifq	12	29.6896
pifq	12	11.0992
pifq	12	10.686
pifq	12	17.4612
pifq	12	13.7431
pifq	12	5.01252
pifq	12	19.2514
pifq	12	25.7787
pifq	12	26.8803
pifq	12	26.0816
pifq	12	14.4867
pifq	12	23.9334
pifq	12	5.0676
pifq	12	14.7622
pifq	12	28.6154
pifq	12	23.3
pifq	12	28.5604
pifq	12	20.353
pifq	12	31.7552
pifq	12	10.3555
pifq	12	11.65
pifq	12	15.2579
pifq	12	16.9379
pifq	12	5.17777
pifq	12	18.2324
pifq	12	28.0922
pifq	12	23.7682
pifq	12	28.6705
pifq	12	17.4612
pifq	12	27.7892
pif3	12	41.5048
pif3	12	36.63
pif3	12	29.5794
pif3	12	28.4502
pif3	12	31.342
pif3	12	26.7151
pif3	12	24.98
pif3	12	41.3395
pif3	12	27.5689
pif3	12	14.1287
pif3	12	16.2494
pif3	12	34.9775
pif3	12	31.4247
pif3	12	41.0366
pif3	12	25.9715
pif3	12	36.1893
pif3	12	34.5093
pif3	12	31.3971
pif3	12	31.4247
pif3	12	28.9735
pif3	12	26.2193
pif3	12	19.3065
pif3	12	23.8233
pif3	12	20.7386
pif3	12	19.7747
pif3	12	31.0115
pif3	12	29.0286
pif3	12	15.6986
pif3	12	15.313
pif3	12	26.9354
pif3	12	25.0075
pif3	12	31.0115
pif3	12	19.4717
pif3	12	25.4482
pif3	12	25.338
pif3	12	28.1197
pif7-1	12	28.3125
pif7-1	12	38.1172
pif7-1	12	30.984
pif7-1	12	33.4352
pif7-1	12	54.642
pif7-1	12	4.5994
pif7-1	12	29.3315
pif7-1	12	38.4202
pif7-1	12	23.6305
pif7-1	12	49.96
pif7-1	12	33.9585
pif7-1	12	41.2845
pif7-1	12	31.0391
pif7-1	12	43.7907
pif7-1	12	44.6445
pif7-1	12	45.1402
pif7-1	12	36.1618
pif7-1	12	40.9264
pif7-1	12	35.6109
pif7-1	12	45.5809
pif7-1	12	35.4182
pif7-1	12	40.9264
pif7-1	12	59.1312
pif7-1	12	5.81122
pif7-1	12	31.7001
pif7-1	12	43.6805
pif7-1	12	28.0922
pif7-1	12	54.2564
pif7-1	12	38.8884
pif7-1	12	46.8203
pif7-1	12	36.2995
pif7-1	12	50.5383
pif7-1	12	49.6019
pif7-1	12	48.5278
pif7-1	12	43.5428
pif7-1	12	44.3966
pif7-2	12	35.8864
pif7-2	12	36.8228
pif7-2	12	42.0281
pif7-2	12	11.3746
pif7-2	12	23.7957
pif7-2	12	25.338
pif7-2	12	29.1387
pif7-2	12	38.6405
pif7-2	12	52.8794
pif7-2	12	25.3656
pif7-2	12	42.8268
pif7-2	12	14.7622
pif7-2	12	12.669
pif7-2	12	34.2339
pif7-2	12	27.4036
pif7-2	12	56.1843
pif7-2	12	39.7697
pif7-2	12	41.3946
pif7-2	12	43.8183
pif7-2	12	49.4367
pif7-2	12	12.2834
pif7-2	12	26.9354
pif7-2	12	29.8548
pif7-2	12	33.628
pif7-2	12	43.1022
pif7-2	12	63.0972
pif7-2	12	28.5604
pif7-2	12	52.0531
pif7-2	12	19.334
pif7-2	12	15.671
pif7-2	12	39.0811
pif7-2	12	32.0306
pif7-2	12	66.8428
pif7-2	12	44.5894
pif3pif7	12	35.9139
pif3pif7	12	9.80471
pif3pif7	12	31.9755
pif3pif7	12	27.2108
pif3pif7	12	17.4612
pif3pif7	12	29.7446
pif3pif7	12	35.666
pif3pif7	12	34.5644
pif3pif7	12	31.7001
pif3pif7	12	42.992
pif3pif7	12	48.5003
pif3pif7	12	36.1067
pif3pif7	12	31.4522
pif3pif7	12	33.7106
pif3pif7	12	54.3115
pif3pif7	12	40.0726
pif3pif7	12	43.5979
pif3pif7	12	53.5954
pif3pif7	12	40.2103
pif3pif7	12	12.6966
pif3pif7	12	35.5008
pif3pif7	12	32.306
pif3pif7	12	19.0861
pif3pif7	12	34.5919
pif3pif7	12	42.2759
pif3pif7	12	39.9074
pif3pif7	12	35.5008
pif3pif7	12	48.996
pif3pif7	12	53.6505
pif3pif7	12	41.5874
pif3pif7	12	28.2023
pif3pif7	12	39.9625
pif3pif7	12	60.1778
pif3pif7	12	44.5619
pif3pif7	12	48.5278
pif3pif7	12	59.7371
Col-0	13	44.011
Col-0	13	46.6826
Col-0	13	37.0706
Col-0	13	44.0386
Col-0	13	41.4772
Col-0	13	36.4096
Col-0	13	20.8212
Col-0	13	58.2499
Col-0	13	46.4071
Col-0	13	38.3375
Col-0	13	37.2083
Col-0	13	45.1402
Col-0	13	44.975
Col-0	13	27.4587
Col-0	13	38.5579
Col-0	13	49.3541
Col-0	13	38.8333
Col-0	13	32.0856
Col-0	13	35.1427
Col-0	13	18.9209
Col-0	13	29.4417
Col-0	13	25.6961
Col-0	13	26.9079
Col-0	13	14.0736
Col-0	13	34.647
Col-0	13	28.643
Col-0	13	25.2003
Col-0	13	24.0711
Col-0	13	27.5964
Col-0	13	5.83876
Col-0	13	24.3465
Col-0	13	29.7171
Col-0	13	37.1808
Col-0	13	19.6094
35S::PIF4	13	NaN
35S::PIF4	13	19.6645
35S::PIF4	13	15.8638
35S::PIF4	13	2.8643
35S::PIF4	13	15.974
35S::PIF4	13	9.11618
35S::PIF4	13	18.4251
35S::PIF4	13	7.43616
35S::PIF4	13	10.6585
35S::PIF4	13	8.17978
35S::PIF4	13	14.4592
35S::PIF4	13	8.34502
35S::PIF4	13	19.7196
35S::PIF4	13	24.1537
35S::PIF4	13	21.9229
35S::PIF4	13	NaN
35S::PIF4	13	21.2068
35S::PIF4	13	18.7006
35S::PIF4	13	NaN
35S::PIF4	13	10.5483
35S::PIF4	13	7.7942
35S::PIF4	13	NaN
35S::PIF4	13	NaN
35S::PIF4	13	4.76465
35S::PIF4	13	4.98498
35S::PIF4	13	NaN
35S::PIF4	13	4.43415
35S::PIF4	13	NaN
35S::PIF4	13	NaN
35S::PIF4	13	NaN
35S::PIF4	13	5.0676
35S::PIF4	13	NaN
35S::PIF4	13	8.2624
35S::PIF4	13	NaN
35S::PIF4	13	NaN
35S::PIF4	13	NaN
phyb	13	23.3826
phyb	13	27.5413
phyb	13	34.2339
phyb	13	27.8443
phyb	13	22.8042
phyb	13	24.4567
phyb	13	18.976
phyb	13	31.0115
phyb	13	14.4867
phyb	13	35.1703
phyb	13	36.2168
phyb	13	19.9675
phyb	13	3.30496
phyb	13	27.4312
phyb	13	17.1032
phyb	13	25.5033
phyb	13	7.57387
phyb	13	5.78368
phyb	13	12.0356
phyb	13	10.4382
phyb	13	12.3661
phyb	13	18.1773
phyb	13	9.00601
phyb	13	15.9464
phyb	13	4.5994
phyb	13	8.42765
phyb	13	17.6265
phyb	13	18.5078
phyb	13	8.81323
phyb	13	6.58238
phyb	13	8.06961
pif4	13	41.2569
pif4	13	47.3986
pif4	13	31.1768
pif4	13	58.0296
pif4	13	51.5574
pif4	13	37.2634
pif4	13	32.4988
pif4	13	63.2349
pif4	13	30.323
pif4	13	46.6826
pif4	13	37.7316
pif4	13	52.0531
pif4	13	61.1693
pif4	13	36.0791
pif4	13	47.2334
pif4	13	43.3501
pif4	13	55.8538
pif4	13	40.5959
pif4	13	38.7782
pif4	13	41.5323
pif4	13	23.7682
pif4	13	54.339
pif4	13	40.2103
pif4	13	35.2529
pif4	13	27.7892
pif4	13	59.9024
pif4	13	25.7236
pif4	13	46.8203
pif4	13	37.346
pif4	13	49.0236
pif4	13	52.4387
pif4	13	29.3866
pif4	13	44.5343
pif4	13	39.99
pif4	13	60.7562
pif4	13	37.9244
pifq	13	7.16075
pifq	13	23.658
pifq	13	35.3906
pifq	13	31.4247
pifq	13	35.6936
pifq	13	23.0246
pifq	13	41.4772
pifq	13	12.669
pifq	13	16.4697
pifq	13	23.9059
pifq	13	20.8763
pifq	13	8.09715
pifq	13	25.0902
pifq	13	37.3736
pifq	13	35.969
pifq	13	36.2444
pifq	13	18.0947
pifq	13	33.4076
pifq	13	7.68403
pifq	13	20.2153
pifq	13	34.3991
pifq	13	28.6705
pifq	13	36.8228
pifq	13	24.5118
pifq	13	39.1087
pifq	13	13.7431
pifq	13	16.7451
pifq	13	19.9675
pifq	13	22.1983
pifq	13	5.89384
pifq	13	23.4928
pifq	13	31.9479
pifq	13	32.4161
pifq	13	35.969
pifq	13	16.0015
pifq	13	25.3656
pif3	13	53.7056
pif3	13	50.1252
pif3	13	41.6976
pif3	13	41.8628
pif3	13	43.6805
pif3	13	34.8398
pif3	13	34.5919
pif3	13	59.3516
pif3	13	37.0706
pif3	13	18.8107
pif3	13	23.2449
pif3	13	47.5088
pif3	13	32.4437
pif3	13	50.318
pif3	13	32.5539
pif3	13	48.2249
pif3	13	41.4772
pif3	13	32.8568
pif3	13	31.7552
pif3	13	28.5328
pif3	13	26.1643
pif3	13	20.5183
pif3	13	28.8633
pif3	13	27.1007
pif3	13	20.353
pif3	13	27.2384
pif3	13	24.5118
pif3	13	16.2769
pif3	13	17.351
pif3	13	32.1132
pif3	13	25.3931
pif3	13	32.1958
pif3	13	15.3956
pif3	13	25.3105
pif3	13	27.1558
pif3	13	28.9735
pif7-1	13	39.7972
pif7-1	13	53.4577
pif7-1	13	42.0832
pif7-1	13	44.975
pif7-1	13	75.1052
pif7-1	13	5.8663
pif7-1	13	38.2274
pif7-1	13	55.1653
pif7-1	13	31.0666
pif7-1	13	66.953
pif7-1	13	48.1422
pif7-1	13	56.4046
pif7-1	13	42.1382
pif7-1	13	57.2309
pif7-1	13	61.4172
pif7-1	13	63.2349
pif7-1	13	52.7141
pif7-1	13	55.6059
pif7-1	13	38.9985
pif7-1	13	52.962
pif7-1	13	39.6044
pif7-1	13	41.5874
pif7-1	13	72.0206
pif7-1	13	5.70106
pif7-1	13	36.7952
pif7-1	13	49.6019
pif7-1	13	29.8273
pif7-1	13	65.3556
pif7-1	13	44.1212
pif7-1	13	53.6505
pif7-1	13	39.8248
pif7-1	13	58.305
pif7-1	13	61.307
pif7-1	13	62.4087
pif7-1	13	50.6485
pif7-1	13	51.8328
pif7-2	13	49.2164
pif7-2	13	52.5489
pif7-2	13	58.1948
pif7-2	13	15.0376
pif7-2	13	31.8653
pif7-2	13	35.4732
pif7-2	13	41.6425
pif7-2	13	46.7927
pif7-2	13	72.2409
pif7-2	13	32.1683
pif7-2	13	58.3325
pif7-2	13	22.0055
pif7-2	13	17.8192
pif7-2	13	44.4242
pif7-2	13	38.5579
pif7-2	13	76.7577
pif7-2	13	52.0807
pif7-2	13	49.8498
pif7-2	13	52.2184
pif7-2	13	58.1948
pif7-2	13	12.669
pif7-2	13	30.7086
pif7-2	13	36.5473
pif7-2	13	41.6425
pif7-2	13	46.0491
pif7-2	13	74.4718
pif7-2	13	27.2384
pif7-2	13	55.7437
pif7-2	13	21.2068
pif7-2	13	14.1287
pif7-2	13	43.3225
pif7-2	13	36.6024
pif7-2	13	78.5754
pif7-2	13	48.2249
pif3pif7	13	44.2314
pif3pif7	13	15.1477
pif3pif7	13	44.314
pif3pif7	13	37.1533
pif3pif7	13	24.6219
pif3pif7	13	39.9349
pif3pif7	13	49.5193
pif3pif7	13	46.7101
pif3pif7	13	42.1933
pif3pif7	13	54.945
pif3pif7	13	66.1818
pif3pif7	13	47.2058
pif3pif7	13	36.2168
pif3pif7	13	46.297
pif3pif7	13	67.4487
pif3pif7	13	53.9535
pif3pif7	13	54.7522
pif3pif7	13	75.3806
pif3pif7	13	44.011
pif3pif7	13	5.92139
pif3pif7	13	42.4412
pif3pif7	13	37.1808
pif3pif7	13	21.1242
pif3pif7	13	38.2274
pif3pif7	13	48.8308
pif3pif7	13	45.1402
pif3pif7	13	38.0897
pif3pif7	13	54.5043
pif3pif7	13	65.2179
pif3pif7	13	48.4727
pif3pif7	13	35.0601
pif3pif7	13	45.4432
pif3pif7	13	69.0737
pif3pif7	13	52.7692
pif3pif7	13	53.623
pif3pif7	13	69.9825
Col-0	14	54.6695
Col-0	14	53.9259
Col-0	14	49.3541
Col-0	14	57.341
Col-0	14	51.337
Col-0	14	52.0807
Col-0	14	32.306
Col-0	14	53.7882
Col-0	14	56.7076
Col-0	14	48.0872
Col-0	14	49.0236
Col-0	14	55.2754
Col-0	14	52.1357
Col-0	14	43.5153
Col-0	14	51.1443
Col-0	14	79.9525
Col-0	14	48.996
Col-0	14	45.2229
Col-0	14	47.4813
Col-0	14	61.9129
Col-0	14	39.6044
Col-0	14	43.4051
Col-0	14	33.1873
Col-0	14	39.8248
Col-0	14	32.664
Col-0	14	41.8353
Col-0	14	46.9304
Col-0	14	36.0241
Col-0	14	36.2444
Col-0	14	39.0811
Col-0	14	47.7291
Col-0	14	19.7747
Col-0	14	46.2144
Col-0	14	39.9625
35S::PIF4	14	NaN
35S::PIF4	14	25.4482
35S::PIF4	14	21.6475
35S::PIF4	14	11.9254
35S::PIF4	14	20.7386
35S::PIF4	14	18.315
35S::PIF4	14	24.2364
35S::PIF4	14	14.294
35S::PIF4	14	16.7176
35S::PIF4	14	23.1623
35S::PIF4	14	19.2238
35S::PIF4	14	15.1202
35S::PIF4	14	23.7131
35S::PIF4	14	30.5433
35S::PIF4	14	42.7166
35S::PIF4	14	4.4617
35S::PIF4	14	30.1302
35S::PIF4	14	26.4672
35S::PIF4	14	11.8152
35S::PIF4	14	8.17978
35S::PIF4	14	7.05058
35S::PIF4	14	8.15223
35S::PIF4	14	15.671
35S::PIF4	14	20.2704
35S::PIF4	14	2.75413
35S::PIF4	14	14.1838
35S::PIF4	14	20.5734
35S::PIF4	14	16.9379
35S::PIF4	14	16.0015
35S::PIF4	14	15.8913
35S::PIF4	14	17.7642
35S::PIF4	14	3.74562
35S::PIF4	14	14.0736
35S::PIF4	14	12.7241
phyb	14	35.9139
phyb	14	34.6195
phyb	14	43.8183
phyb	14	35.2804
phyb	14	21.7577
phyb	14	35.9414
phyb	14	33.2148
phyb	14	39.0261
phyb	14	12.6139
phyb	14	31.8929
phyb	14	38.0621
phyb	14	37.2634
phyb	14	44.6445
phyb	14	34.3716
phyb	14	31.6725
phyb	14	40.4582
phyb	14	21.5649
phyb	14	31.6725
phyb	14	20.4907
phyb	14	26.1367
phyb	14	30.2955
phyb	14	24.1537
phyb	14	15.5609
phyb	14	32.0581
phyb	14	36.8503
phyb	14	18.5353
phyb	14	15.4507
phyb	14	22.6114
phyb	14	30.1853
phyb	14	23.5754
phyb	14	23.8508
phyb	14	18.7556
phyb	14	28.0922
phyb	14	22.0606
pif4	14	54.8348
pif4	14	58.3601
pif4	14	42.6064
pif4	14	81.6876
pif4	14	69.9825
pif4	14	50.3456
pif4	14	42.2484
pif4	14	87.0306
pif4	14	39.6595
pif4	14	65.0802
pif4	14	50.4282
pif4	14	70.8363
pif4	14	80.5584
pif4	14	46.8753
pif4	14	61.3621
pif4	14	57.4512
pif4	14	76.1242
pif4	14	52.4112
pif4	14	78.4102
pif4	14	88.0496
pif4	14	92.5664
pif4	14	47.3435
pif4	14	63.0146
pif4	14	62.4913
pif4	14	64.1988
pif4	14	55.9364
pif4	14	43.3501
pif4	14	59.0486
pif4	14	64.9975
pif4	14	35.8864
pif4	14	67.6966
pif4	14	53.2099
pif4	14	35.2804
pif4	14	88.27
pifq	14	10.7687
pifq	14	32.5814
pifq	14	46.655
pifq	14	42.4963
pifq	14	49.0511
pifq	14	31.8102
pifq	14	55.8814
pifq	14	16.993
pifq	14	23.9334
pifq	14	30.0476
pifq	14	29.6896
pifq	14	12.0906
pifq	14	31.7552
pifq	14	42.4963
pifq	14	49.0787
pifq	14	51.3921
pifq	14	21.1242
pifq	14	40.6785
pifq	14	53.2925
pifq	14	22.0881
pifq	14	64.6395
pifq	14	41.5599
pifq	14	22.8318
pifq	14	9.83225
pifq	14	8.64798
pifq	14	28.3676
pifq	14	12.4762
pifq	14	49.0236
pifq	14	10.6585
pifq	14	26.2744
pifq	14	33.5453
pifq	14	49.5469
pifq	14	43.5428
pifq	14	52.0531
pifq	14	30.2404
pif3	14	61.4447
pif3	14	54.7797
pif3	14	55.661
pif3	14	49.5744
pif3	14	53.6781
pif3	14	47.977
pif3	14	42.634
pif3	14	65.5208
pif3	14	43.7907
pif3	14	25.6685
pif3	14	27.4587
pif3	14	39.7697
pif3	14	42.9369
pif3	14	64.5844
pif3	14	44.3415
pif3	14	59.9024
pif3	14	54.6971
pif3	14	47.316
pif3	14	49.9875
pif3	14	28.2299
pif3	14	54.6971
pif3	14	38.3375
pif3	14	42.8268
pif3	14	40.8163
pif3	14	40.954
pif3	14	54.7797
pif3	14	32.7191
pif3	14	35.7762
pif3	14	24.5944
pif3	14	54.9725
pif3	14	48.5278
pif3	14	23.9334
pif3	14	35.4182
pif3	14	31.5899
pif3	14	33.7106
pif7-1	14	55.6335
pif7-1	14	78.603
pif7-1	14	61.307
pif7-1	14	61.3621
pif7-1	14	101.077
pif7-1	14	11.6224
pif7-1	14	52.6315
pif7-1	14	70.8914
pif7-1	14	40.7612
pif7-1	14	92.3736
pif7-1	14	62.629
pif7-1	14	73.2599
pif7-1	14	58.1673
pif7-1	14	82.1558
pif7-1	14	86.1217
pif7-1	14	91.2444
pif7-1	14	73.1498
pif7-1	14	74.3341
pif7-1	14	81.4397
pif7-1	14	103.528
pif7-1	14	68.633
pif7-1	14	95.2104
pif7-1	14	100.994
pif7-1	14	105.18
pif7-1	14	15.5058
pif7-1	14	59.0211
pif7-1	14	84.1938
pif7-1	14	50.3731
pif7-1	14	114.765
pif7-1	14	83.3951
pif7-1	14	65.7962
pif7-1	14	64.0061
pif7-1	14	61.8578
pif7-1	14	95.0451
pif7-1	14	69.0737
pif7-2	14	66.2369
pif7-2	14	69.5143
pif7-2	14	82.1007
pif7-2	14	16.9655
pif7-2	14	42.3861
pif7-2	14	48.3075
pif7-2	14	57.7542
pif7-2	14	58.5529
pif7-2	14	94.7146
pif7-2	14	41.312
pif7-2	14	72.2685
pif7-2	14	29.8273
pif7-2	14	20.353
pif7-2	14	58.4152
pif7-2	14	49.8773
pif7-2	14	105.291
pif7-2	14	69.1012
pif7-2	14	34.6745
pif7-2	14	67.2559
pif7-2	14	117.409
pif7-2	14	45.994
pif7-2	14	80.4482
pif7-2	14	67.7517
pif7-2	14	108.045
pif7-2	14	23.8508
pif7-2	14	63.8683
pif7-2	14	50.8964
pif7-2	14	69.1838
pif7-2	14	78.8784
pif7-2	14	95.293
pif7-2	14	16.9655
pif7-2	14	54.2289
pif7-2	14	54.0912
pif3pif7	14	61.0316
pif3pif7	14	21.4547
pif3pif7	14	60.2329
pif3pif7	14	50.9239
pif3pif7	14	34.5368
pif3pif7	14	48.9134
pif3pif7	14	67.8618
pif3pif7	14	62.8218
pif3pif7	14	56.9555
pif3pif7	14	70.8088
pif3pif7	14	92.5113
pif3pif7	14	65.7687
pif3pif7	14	47.8668
pif3pif7	14	66.3746
pif3pif7	14	92.6215
pif3pif7	14	73.6731
pif3pif7	14	78.4377
pif3pif7	14	103.225
pif3pif7	14	99.9475
pif3pif7	14	38.3926
pif3pif7	14	80.8338
pif3pif7	14	90.7762
pif3pif7	14	115.398
pif3pif7	14	68.7707
pif3pif7	14	58.2775
pif3pif7	14	67.972
pif3pif7	14	64.3916
pif3pif7	14	80.7787
pif3pif7	14	104.988
pif3pif7	14	72.4062
pif3pif7	14	56.8728
pif3pif7	14	77.0882
pif3pif7	14	48.1973
pif3pif7	14	73.4803
pif3pif7	14	72.1858
pif3pif7	14	25.3105
Col-0	15	67.0356
Col-0	15	72.1858
Col-0	15	122.036
Col-0	15	67.8618
Col-0	15	69.1287
Col-0	15	61.665
Col-0	15	70.8088
Col-0	15	65.8513
Col-0	15	74.6921
Col-0	15	80.7236
Col-0	15	73.0121
Col-0	15	61.8578
Col-0	15	62.0231
Col-0	15	75.7662
Col-0	15	46.1593
Col-0	15	85.9014
Col-0	15	74.4718
Col-0	15	59.4617
Col-0	15	65.9064
Col-0	15	94.0261
Col-0	15	56.4046
Col-0	15	54.5318
Col-0	15	43.0196
Col-0	15	54.3666
Col-0	15	50.7862
Col-0	15	57.5338
Col-0	15	66.8703
Col-0	15	65.7962
Col-0	15	49.7121
Col-0	15	51.3095
Col-0	15	64.4743
Col-0	15	36.1893
Col-0	15	64.8874
Col-0	15	59.6821
35S::PIF4	15	28.2023
35S::PIF4	15	25.7511
35S::PIF4	15	15.6159
35S::PIF4	15	17.6265
35S::PIF4	15	26.5223
35S::PIF4	15	37.346
35S::PIF4	15	6.55484
35S::PIF4	15	20.5183
35S::PIF4	15	34.0962
35S::PIF4	15	22.0881
35S::PIF4	15	24.9524
35S::PIF4	15	18.9484
35S::PIF4	15	28.2849
35S::PIF4	15	9.25389
35S::PIF4	15	22.0606
35S::PIF4	15	19.995
35S::PIF4	15	16.5523
35S::PIF4	15	20.8763
35S::PIF4	15	35.0326
35S::PIF4	15	21.2894
35S::PIF4	15	13.2749
35S::PIF4	15	4.21382
35S::PIF4	15	21.0967
35S::PIF4	15	30.4607
35S::PIF4	15	13.2198
35S::PIF4	15	15.0376
35S::PIF4	15	24.7046
35S::PIF4	15	20.2704
35S::PIF4	15	24.4016
35S::PIF4	15	18.3701
35S::PIF4	15	20.2704
35S::PIF4	15	10.1352
35S::PIF4	15	17.1032
35S::PIF4	15	20.6285
35S::PIF4	15	16.0015
35S::PIF4	15	18.2048
phyb	15	36.1893
phyb	15	46.6275
phyb	15	47.8393
phyb	15	38.7231
phyb	15	35.8864
phyb	15	25.0626
phyb	15	57.7266
phyb	15	40.0726
phyb	15	31.4522
phyb	15	34.8673
phyb	15	6.77517
phyb	15	38.8333
phyb	15	51.9429
phyb	15	26.3295
phyb	15	33.6555
phyb	15	31.9204
phyb	15	37.4011
phyb	15	50.5659
phyb	15	24.2915
phyb	15	40.4582
phyb	15	37.5664
phyb	15	30.626
phyb	15	27.321
phyb	15	32.003
phyb	15	40.5408
phyb	15	35.7211
phyb	15	29.6345
phyb	15	35.0326
phyb	15	32.967
phyb	15	27.0456
phyb	15	27.8443
phyb	15	37.9244
phyb	15	38.1723
phyb	15	25.2003
phyb	15	23.7131
phyb	15	34.6195
pif4	15	88.325
pif4	15	112.672
pif4	15	120.879
pif4	15	65.5208
pif4	15	83.0371
pif4	15	77.4738
pif4	15	96.973
pif4	15	68.8533
pif4	15	62.4913
pif4	15	76.6751
pif4	15	83.0096
pif4	15	53.7882
pif4	15	89.6195
pif4	15	63.5929
pif4	15	60.6736
pif4	15	109.064
pif4	15	73.1498
pif4	15	116.445
pif4	15	98.2399
pif4	15	125.478
pif4	15	130.766
pif4	15	68.7707
pif4	15	91.7126
pif4	15	88.1873
pif4	15	92.1533
pif4	15	77.1157
pif4	15	68.0271
pif4	15	82.5138
pif4	15	92.2084
pif4	15	58.7732
pif4	15	100.306
pif4	15	69.0737
pif4	15	54.3666
pif4	15	120.438
pif4	15	74.4718
pif4	15	124.322
pifq	15	70.9189
pifq	15	22.8318
pifq	15	80.2004
pifq	15	59.0762
pifq	15	25.6134
pifq	15	10.7687
pifq	15	4.81973
pifq	15	43.2399
pifq	15	16.332
pifq	15	59.0211
pifq	15	17.296
pifq	15	34.0411
pifq	15	45.7461
pifq	15	61.7201
pifq	15	60.7562
pifq	15	68.4127
pifq	15	48.6931
pifq	15	35.1152
pifq	15	70.1478
pifq	15	28.0646
pifq	15	91.4923
pifq	15	60.1778
pifq	15	25.0626
pifq	15	13.1097
pifq	15	5.26039
pifq	15	35.9414
pifq	15	17.9569
pifq	15	62.1057
pifq	15	15.4507
pifq	15	37.5939
pifq	15	48.6931
pifq	15	64.6946
pifq	15	62.6841
pifq	15	72.3235
pifq	15	54.339
pifq	15	37.7041
pif3	15	78.658
pif3	15	58.0296
pif3	15	86.7001
pif3	15	66.8428
pif3	15	75.3255
pif3	15	70.9189
pif3	15	64.667
pif3	15	91.988
pif3	15	58.6906
pif3	15	63.6205
pif3	15	34.7847
pif3	15	96.0917
pif3	15	54.0361
pif3	15	32.1958
pif3	15	59.2965
pif3	15	61.7752
pif3	15	56.7076
pif3	15	62.6841
pif3	15	60.6736
pif3	15	40.4031
pif3	15	67.0081
pif3	15	57.947
pif3	15	56.4597
pif3	15	55.9089
pif3	15	54.0361
pif3	15	80.6961
pif3	15	39.9625
pif3	15	52.2734
pif3	15	35.5559
pif3	15	68.33
pif3	15	55.4682
pif3	15	24.2915
pif3	15	43.9284
pif3	15	45.6084
pif3	15	42.634
pif3	15	45.6911
pif7-1	15	91.933
pif7-1	15	126.525
pif7-1	15	85.3781
pif7-1	15	116.004
pif7-1	15	119.337
pif7-1	15	132.419
pif7-1	15	17.1858
pif7-1	15	71.6625
pif7-1	15	99.3691
pif7-1	15	56.3496
pif7-1	15	143.05
pif7-1	15	107.273
pif7-1	15	83.9184
pif7-1	15	72.0206
pif7-1	15	71.7452
pif7-1	15	118.345
pif7-1	15	93.8333
pif7-1	15	83.643
pif7-1	15	104.988
pif7-1	15	142.802
pif7-1	15	94.0812
pif7-1	15	128.618
pif7-1	15	137.046
pif7-1	15	145.942
pif7-1	15	18.4802
pif7-1	15	81.9079
pif7-1	15	113.801
pif7-1	15	61.307
pif7-1	15	163.761
pif7-1	15	120.493
pif7-1	15	97.1383
pif7-1	15	80.5859
pif7-1	15	81.9355
pif7-1	15	131.152
pif7-1	15	103.473
pif7-1	15	90.2254
pif7-2	15	43.8183
pif7-2	15	87.1959
pif7-2	15	151.037
pif7-2	15	61.3621
pif7-2	15	100.085
pif7-2	15	80.5308
pif7-2	15	134.209
pif7-2	15	31.0115
pif7-2	15	75.8764
pif7-2	15	66.1543
pif7-2	15	90.0326
pif7-2	15	96.615
pif7-2	15	96.3396
pif7-2	15	120.631
pif7-2	15	20.0225
pif7-2	15	67.1182
pif7-2	15	66.8703
pif7-2	15	45.5258
pif7-2	15	92.9244
pif7-2	15	165.248
pif7-2	15	64.612
pif7-2	15	112.782
pif7-2	15	90.2254
pif7-2	15	150.679
pif7-2	15	33.6555
pif7-2	15	83.3125
pif7-2	15	73.9209
pif7-2	15	97.7442
pif7-2	15	106.75
pif7-2	15	106.007
pif7-2	15	134.594
pif7-2	15	17.2409
pif7-2	15	72.1307
pif7-2	15	72.2134
pif3pif7	15	129.114
pif3pif7	15	47.8393
pif3pif7	15	101.958
pif3pif7	15	109.532
pif3pif7	15	141.012
pif3pif7	15	81.5223
pif3pif7	15	65.9339
pif3pif7	15	72.1032
pif3pif7	15	74.2239
pif3pif7	15	98.4052
pif3pif7	15	130.629
pif3pif7	15	89.5919
pif3pif7	15	65.9615
pif3pif7	15	93.971
pif3pif7	15	66.4297
pif3pif7	15	93.4753
pif3pif7	15	80.2279
pif3pif7	15	30.4607
pif3pif7	15	139.442
pif3pif7	15	53.3751
pif3pif7	15	109.697
pif3pif7	15	122.862
pif3pif7	15	154.81
pif3pif7	15	96.7252
pif3pif7	15	78.1348
pif3pif7	15	82.2935
pif3pif7	15	85.3506
pif3pif7	15	113.994
pif3pif7	15	143.463
pif3pif7	15	100.168
pif3pif7	15	69.8999
pif3pif7	15	108.54
pif3pif7	15	67.1458
pif3pif7	15	106.475
pif3pif7	15	89.8674
pif3pif7	15	34.5093
Col-0	16	87.2509
Col-0	16	89.289
Col-0	16	137.514
Col-0	16	88.931
Col-0	16	84.5519
Col-0	16	81.1368
Col-0	16	81.4673
Col-0	16	72.7091
Col-0	16	85.4607
Col-0	16	100.774
Col-0	16	85.1303
Col-0	16	82.4037
Col-0	16	80.9715
Col-0	16	98.6255
Col-0	16	55.6059
Col-0	16	85.7637
Col-0	16	95.9265
Col-0	16	65.6861
Col-0	16	64.6395
Col-0	16	50.9239
Col-0	16	69.2114
Col-0	16	54.5043
Col-0	16	72.296
Col-0	16	85.2404
Col-0	16	71.8829
Col-0	16	53.981
Col-0	16	59.4617
Col-0	16	74.9124
Col-0	16	41.2294
Col-0	16	64.8874
Col-0	16	83.0096
Col-0	16	65.4933
Col-0	16	54.2564
Col-0	16	106.668
35S::PIF4	16	44.5343
35S::PIF4	16	NaN
35S::PIF4	16	21.4822
35S::PIF4	16	18.5353
35S::PIF4	16	38.8333
35S::PIF4	16	48.4177
35S::PIF4	16	16.8828
35S::PIF4	16	32.306
35S::PIF4	16	44.1488
35S::PIF4	16	33.9034
35S::PIF4	16	35.8037
35S::PIF4	16	18.5078
35S::PIF4	16	35.4457
35S::PIF4	16	10.2454
35S::PIF4	16	26.3295
35S::PIF4	16	24.2639
35S::PIF4	16	30.2955
35S::PIF4	16	32.5263
35S::PIF4	16	15.671
35S::PIF4	16	15.8913
35S::PIF4	16	9.96996
35S::PIF4	16	18.1497
35S::PIF4	16	9.08864
35S::PIF4	16	29.3315
35S::PIF4	16	25.3931
35S::PIF4	16	17.0205
35S::PIF4	16	12.6139
35S::PIF4	16	25.9715
35S::PIF4	16	24.4016
35S::PIF4	16	16.3871
35S::PIF4	16	16.9655
35S::PIF4	16	23.355
35S::PIF4	16	4.5994
35S::PIF4	16	18.7006
35S::PIF4	16	41.009
35S::PIF4	16	20.8763
phyb	16	41.1192
phyb	16	66.5123
phyb	16	58.4978
phyb	16	54.7522
phyb	16	51.0341
phyb	16	57.5889
phyb	16	62.6841
phyb	16	41.5874
phyb	16	52.2184
phyb	16	24.5669
phyb	16	53.8433
phyb	16	47.977
phyb	16	59.324
phyb	16	45.3606
phyb	16	56.983
phyb	16	61.61
phyb	16	44.4517
phyb	16	47.5639
phyb	16	18.8383
phyb	16	35.8864
phyb	16	30.1027
phyb	16	50.2629
phyb	16	44.9199
phyb	16	43.956
phyb	16	38.31
phyb	16	41.3671
phyb	16	59.1037
phyb	16	41.9179
phyb	16	52.5213
phyb	16	26.6325
phyb	16	50.5108
phyb	16	20.9314
phyb	16	51.64
phyb	16	41.8628
phyb	16	37.8418
phyb	16	41.8353
pif4	16	115.426
pif4	16	151.808
pif4	16	160.263
pif4	16	84.8548
pif4	16	112.892
[truncated: 6,136 more rows]

## Sheet: Stat_Rosette_RGR_(28-35hAT_nAT)
Plant Info	RGR 28-35			# View the Tukey's HSD resul	ts
Col-0_hAT	98.2242			> print(tukey_result)
Col-0_hAT	71.5563			Tukey multiple comparisons of means
Col-0_hAT	73.2442			95% family-wise confidence level
Col-0_hAT	154.991
Col-0_hAT	135.979			Fit: aov(formula = RGR.28.35~Plant.Info,data=rosette_data)
Col-0_hAT	72.237
Col-0_hAT	85.6732			significant differences are highlighted
Col-0_hAT	86.9283			Line_Condition	diff	lwr	upr	p adj
Col-0_hAT	73.1734			35S::PIF4_nAT-35S::PIF4_hAT	52.0128	-9.61175	113.637	0.223589
Col-0_hAT	57.9352			Col-0_hAT-35S::PIF4_hAT	38.4776	-33.0215	109.977	0.914848
Col-0_hAT	128.484			Col-0_nAT-35S::PIF4_hAT	221.494	159.87	283.119	0
Col-0_hAT	131.388			phyb_hAT-35S::PIF4_hAT	-36.6322	-107.102	33.8382	0.936034
Col-0_hAT	127.402			phyb_nAT-35S::PIF4_hAT	-34.8963	-96.8432	27.0505	0.878806
Col-0_hAT	80.3459			pif3_hAT-35S::PIF4_hAT	13.0021	-57.4682	83.4725	1
Col-0_hAT	151.249			pif3_nAT-35S::PIF4_hAT	94.0233	32.7043	155.342	1.77e-05
Col-0_hAT	130.042			pif3pif7_hAT-35S::PIF4_hAT	72.2151	1.7448	142.685	0.0378247
Col-0_hAT	81.5184			pif3pif7_nAT-35S::PIF4_hAT	175	113.971	236.029	0
35S::PIF4_hAT	55.1338			pif4_hAT-35S::PIF4_hAT	71.2739	0.803583	141.744	0.044027
35S::PIF4_hAT	15.5963			pif4_nAT-35S::PIF4_hAT	232.522	170.897	294.146	0
35S::PIF4_hAT	91.5002			pif7-1_hAT-35S::PIF4_hAT	53.7406	-16.7298	124.211	0.400286
35S::PIF4_hAT	87.6759			pif7-1_nAT-35S::PIF4_hAT	156.248	94.9289	217.567	0
35S::PIF4_hAT	49.7908			pif7-2_hAT-35S::PIF4_hAT	84.5138	13.0146	156.013	0.0051122
35S::PIF4_hAT	78.2961			pif7-2_nAT-35S::PIF4_hAT	232.22	170.273	294.167	0
35S::PIF4_hAT	48.8662			pifq_hAT-35S::PIF4_hAT	50.6571	-20.842	122.156	0.542087
35S::PIF4_hAT	54.5004			pifq_nAT-35S::PIF4_hAT	178.124	116.805	239.443	0
35S::PIF4_hAT	58.3286			Col-0_hAT-35S::PIF4_nAT	-13.5351	-76.3335	49.2633	0.999999
35S::PIF4_hAT	17.7169			Col-0_nAT-35S::PIF4_nAT	169.481	118.207	220.756	0
35S::PIF4_hAT	123.114			phyb_hAT-35S::PIF4_nAT	-88.6449	-150.269	-27.0204	9.45e-05
35S::PIF4_hAT	40.3048			phyb_nAT-35S::PIF4_nAT	-86.9091	-138.571	-35.2474	1.1e-06
35S::PIF4_hAT	14.9471			pif3_hAT-35S::PIF4_nAT	-39.0106	-100.635	22.6139	0.738306
35S::PIF4_hAT	70.5609			pif3_nAT-35S::PIF4_nAT	42.0106	-8.89656	92.9177	0.25909
35S::PIF4_hAT	8.10109			pif3pif7_hAT-35S::PIF4_nAT	20.2024	-41.4221	81.8269	0.999599
35S::PIF4_hAT	121.961			pif3pif7_nAT-35S::PIF4_nAT	122.987	72.4297	173.545	0
35S::PIF4_hAT	165.161			pif4_hAT-35S::PIF4_nAT	19.2611	-42.3634	80.8857	0.999787
35S::PIF4_hAT	48.5947			pif4_nAT-35S::PIF4_nAT	180.509	129.234	231.784	0
phyb_hAT	30.803			pif7-1_hAT-35S::PIF4_nAT	1.72781	-59.8967	63.3523	1
phyb_hAT	14.7385			pif7-1_nAT-35S::PIF4_nAT	104.235	53.328	155.142	0
phyb_hAT	31.8968			pif7-2_hAT-35S::PIF4_nAT	32.501	-30.2974	95.2994	0.938381
phyb_hAT	35.245			pif7-2_nAT-35S::PIF4_nAT	180.207	128.546	231.869	0
phyb_hAT	9.07684			pifq_hAT-35S::PIF4_nAT	-1.35561	-64.154	61.4428	1
phyb_hAT	48.6183			pifq_nAT-35S::PIF4_nAT	126.111	75.204	177.018	0
phyb_hAT	34.9972			Col-0_nAT-Col-0_hAT	183.016	120.218	245.815	0
phyb_hAT	25.7511			phyb_hAT-Col-0_hAT	-75.1098	-146.609	-3.61065	0.0279915
phyb_hAT	20.235			phyb_nAT-Col-0_hAT	-73.374	-136.489	-10.2592	0.0066833
phyb_hAT	46.1671			pif3_hAT-Col-0_hAT	-25.4755	-96.9746	46.0236	0.99884
phyb_hAT	30.0594			pif3_nAT-Col-0_hAT	55.5457	-6.95297	118.044	0.152791
phyb_hAT	24.4016			pif3pif7_hAT-Col-0_hAT	33.7375	-37.7617	105.237	0.973457
phyb_hAT	-1.53838			pif3pif7_nAT-Col-0_hAT	136.522	74.3081	198.737	0
phyb_hAT	42.3192			pif4_hAT-Col-0_hAT	32.7963	-38.7029	104.295	0.979905
phyb_hAT	50.5659			pif4_nAT-Col-0_hAT	194.044	131.246	256.843	0
phyb_hAT	28.4108			pif7-1_hAT-Col-0_hAT	15.2629	-56.2362	86.7621	0.999999
phyb_hAT	2.85249			pif7-1_nAT-Col-0_hAT	117.77	55.2716	180.269	0
phyb_hAT	16.1707			pif7-2_hAT-Col-0_hAT	46.0361	-26.4772	118.55	0.733933
pif4_hAT	109.28			pif7-2_nAT-Col-0_hAT	193.742	130.628	256.857	0
pif4_hAT	76.5334			pifq_hAT-Col-0_hAT	12.1795	-60.3338	84.6929	1
pif4_hAT	141.767			pifq_nAT-Col-0_hAT	139.646	77.1476	202.145	0
pif4_hAT	76.0298			phyb_hAT-Col-0_nAT	-258.126	-319.751	-196.502	0
pif4_hAT	319.963			phyb_nAT-Col-0_nAT	-256.39	-308.052	-204.729	0
pif4_hAT	247.778			pif3_hAT-Col-0_nAT	-208.492	-270.116	-146.867	0
pif4_hAT	177.917			pif3_nAT-Col-0_nAT	-127.471	-178.378	-76.5636	0
pif4_hAT	186.785			pif3pif7_hAT-Col-0_nAT	-149.279	-210.903	-87.6545	0
pif4_hAT	77.0567			pif3pif7_nAT-Col-0_nAT	-46.4941	-97.0517	4.06339	0.114724
pif4_hAT	71.1511			pif4_hAT-Col-0_nAT	-150.22	-211.845	-88.5957	0
pif4_hAT	144.521			pif4_nAT-Col-0_nAT	11.0278	-40.2468	62.3025	0.999999
pif4_hAT	130.365			pif7-1_hAT-Col-0_nAT	-167.754	-229.378	-106.129	0
pif4_hAT	74.7039			pif7-1_nAT-Col-0_nAT	-65.2462	-116.153	-14.3391	0.0011966
pif4_hAT	120.092			pif7-2_hAT-Col-0_nAT	-136.98	-199.779	-74.1819	0
pif4_hAT	113.545			pif7-2_nAT-Col-0_nAT	10.726	-40.9356	62.3877	0.999999
pif4_hAT	172.704			pifq_hAT-Col-0_nAT	-170.837	-233.635	-108.039	0
pif4_hAT	125.101			pifq_nAT-Col-0_nAT	-43.3702	-94.2773	7.5369	0.209645
pif4_hAT	67.7871			phyb_nAT-phyb_hAT	1.73583	-60.211	63.6827	1
pifq_hAT	68.1491			pif3_hAT-phyb_hAT	49.6343	-20.836	120.105	0.553334
pifq_hAT	177.142			pif3_nAT-phyb_hAT	130.655	69.3365	191.974	0
pifq_hAT	234.869			pif3pif7_hAT-phyb_hAT	108.847	38.377	179.318	1.45e-05
pifq_hAT	141.68			pif3pif7_nAT-phyb_hAT	211.632	150.603	272.661	0
pifq_hAT	131.183			pif4_hAT-phyb_hAT	107.906	37.4357	178.376	1.84e-05
pifq_hAT	-0.767223			pif4_nAT-phyb_hAT	269.154	207.53	330.779	0
pifq_hAT	-15.2736			pif7-1_hAT-phyb_hAT	90.3727	19.9024	160.843	0.001183
pifq_hAT	194.513			pif7-1_nAT-phyb_hAT	192.88	131.561	254.199	0
pifq_hAT	47.2845			pif7-2_hAT-phyb_hAT	121.146	49.6468	192.645	8e-07
pifq_hAT	86.2398			pif7-2_nAT-phyb_hAT	268.852	206.905	330.799	0
pifq_hAT	181.427			pifq_hAT-phyb_hAT	87.2893	15.7902	158.788	0.0029499
pifq_hAT	154.027			pifq_nAT-phyb_hAT	214.756	153.437	276.075	0
pifq_hAT	171.838			pif3_hAT-phyb_nAT	47.8985	-14.0484	109.845	0.374156
pifq_hAT	96.2806			pif3_nAT-phyb_nAT	128.92	77.6228	180.217	0
pifq_hAT	92.6766			pif3pif7_hAT-phyb_nAT	107.111	45.1646	169.058	4e-07
pifq_hAT	118.16			pif3pif7_nAT-phyb_nAT	209.896	158.946	260.846	0
pifq_hAT	67.9956			pif4_hAT-phyb_nAT	106.17	44.2234	168.117	6e-07
pif3_hAT	55.5509			pif4_nAT-phyb_nAT	267.418	215.757	319.08	0
pif3_hAT	69.1838			pif7-1_hAT-phyb_nAT	88.6369	26.69	150.584	0.0001077
pif3_hAT	38.5893			pif7-1_nAT-phyb_nAT	191.144	139.847	242.441	0
pif3_hAT	63.8251			pif7-2_hAT-phyb_nAT	119.41	56.2953	182.525	0
pif3_hAT	55.3502			pif7-2_nAT-phyb_nAT	267.116	215.071	319.162	0
pif3_hAT	81.3256			pifq_hAT-phyb_nAT	85.5535	22.4387	148.668	0.0003756
pif3_hAT	133.937			pifq_nAT-phyb_nAT	213.02	161.723	264.317	0
pif3_hAT	43.1769			pif3_nAT-pif3_hAT	81.0212	19.7022	142.34	0.0006479
pif3_hAT	65.5444			pif3pif7_hAT-pif3_hAT	59.213	-11.2573	129.683	0.230445
pif3_hAT	25.7669			pif3pif7_nAT-pif3_hAT	161.998	100.969	223.027	0
pif3_hAT	204.368			pif4_hAT-pif3_hAT	58.2718	-12.1985	128.742	0.25582
pif3_hAT	119.502			pif4_nAT-pif3_hAT	219.52	157.895	281.144	0
pif3_hAT	55.3502			pif7-1_hAT-pif3_hAT	40.7384	-29.7319	111.209	0.853859
pif3_hAT	130.259			pif7-1_nAT-pif3_hAT	143.246	81.9267	204.565	0
pif3_hAT	36.9369			pif7-2_hAT-pif3_hAT	71.5116	0.0125044	143.011	0.0499034
pif3_hAT	107.144			pif7-2_nAT-pif3_hAT	219.218	157.271	281.165	0
pif3_hAT	46.6196			pifq_hAT-pif3_hAT	37.655	-33.8441	109.154	0.92863
pif3_hAT	51.758			pifq_nAT-pif3_hAT	165.122	103.803	226.441	0
pif7-1_hAT	89.7572			pif3pif7_hAT-pif3_nAT	-21.8082	-83.1272	39.5108	0.998866
pif7-1_hAT	277.888			pif3pif7_nAT-pif3_nAT	80.9766	30.7919	131.161	4e-06
pif7-1_hAT	13.873			pif4_hAT-pif3_nAT	-22.7494	-84.0684	38.5696	0.998095
pif7-1_hAT	80.0666			pif4_nAT-pif3_nAT	138.499	87.5915	189.406	0
pif7-1_hAT	121.04			pif7-1_hAT-pif3_nAT	-40.2828	-101.602	21.0363	0.67906
pif7-1_hAT	30.9447			pif7-1_nAT-pif3_nAT	62.2246	11.6877	112.761	0.002536
pif7-1_hAT	83.9184			pif7-2_hAT-pif3_nAT	-9.50954	-72.0082	52.9891	1
pif7-1_hAT	107.187			pif7-2_nAT-pif3_nAT	138.197	86.8999	189.494	0
pif7-1_hAT	189.956			pifq_hAT-pif3_nAT	-43.3662	-105.865	19.1325	0.581517
pif7-1_hAT	209.586			pifq_nAT-pif3_nAT	84.1005	33.5637	134.637	1.5e-06
pif7-1_hAT	144.037			pif3pif7_nAT-pif3pif7_hAT	102.785	41.7557	163.814	1e-06
pif7-1_hAT	122.091			pif4_hAT-pif3pif7_hAT	-0.941214	-71.4115	69.5291	1
pif7-1_hAT	100.864			pif4_nAT-pif3pif7_hAT	160.307	98.6823	221.931	0
pif7-1_hAT	165.787			pif7-1_hAT-pif3pif7_hAT	-18.4745	-88.9449	51.9958	0.999982
pif7-1_hAT	70.2107			pif7-1_nAT-pif3pif7_hAT	84.0328	22.7137	145.352	0.0002949
pif7-1_hAT	113.828			pif7-2_hAT-pif3pif7_hAT	12.2987	-59.2005	83.7978	1
pif7-1_hAT	103.319			pif7-2_nAT-pif3pif7_hAT	160.005	98.0581	221.952	0
pif7-1_hAT	93.1251			pifq_hAT-pif3pif7_hAT	-21.558	-93.0571	49.9412	0.999869
pif7-2_hAT	140.571			pifq_nAT-pif3pif7_hAT	105.909	44.5897	167.228	4e-07
pif7-2_hAT	165.055			pif4_hAT-pif3pif7_nAT	-103.726	-164.755	-42.697	8e-07
pif7-2_hAT	75.4514			pif4_nAT-pif3pif7_nAT	57.522	6.96446	108.08	0.0093266
pif7-2_hAT	56.9397			pif7-1_hAT-pif3pif7_nAT	-121.259	-182.288	-60.2303	0
pif7-2_hAT	257.551			pif7-1_nAT-pif3pif7_nAT	-18.7521	-68.9368	31.4326	0.997923
pif7-2_hAT	312.964			pif7-2_hAT-pif3pif7_nAT	-90.4862	-152.7	-28.2719	7.18e-05
pif7-2_hAT	166.165			pif7-2_nAT-pif3pif7_nAT	57.2202	6.27021	108.17	0.0113138
pif7-2_hAT	170.898			pifq_hAT-pif3pif7_nAT	-124.343	-186.557	-62.1286	0
pif7-2_hAT	147.047			pifq_nAT-pif3pif7_nAT	3.12392	-47.0608	53.3086	1
pif7-2_hAT	154.7			pif4_nAT-pif4_hAT	161.248	99.6235	222.873	0
pif7-2_hAT	192.526			pif7-1_hAT-pif4_hAT	-17.5333	-88.0037	52.937	0.999991
pif7-2_hAT	74.1255			pif7-1_nAT-pif4_hAT	84.974	23.655	146.293	0.0002292
pif7-2_hAT	38.2943			pif7-2_hAT-pif4_hAT	13.2399	-58.2593	84.739	1
pif7-2_hAT	150.49			pif7-2_nAT-pif4_hAT	160.946	98.9993	222.893	0
pif7-2_hAT	185.263			pifq_hAT-pif4_hAT	-20.6168	-92.1159	50.8824	0.999929
pif7-2_hAT	159.523			pifq_nAT-pif4_hAT	106.85	45.5309	168.169	3e-07
pif7-2_hAT	75.4239			pif7-1_hAT-pif4_nAT	-178.781	-240.406	-117.157	0
pif3pif7_hAT	160.353			pif7-1_nAT-pif4_nAT	-76.274	-127.181	-25.3669	3.33e-05
pif3pif7_hAT	147.071			pif7-2_hAT-pif4_nAT	-148.008	-210.807	-85.2097	0
pif3pif7_hAT	82.4823			pif7-2_nAT-pif4_nAT	-0.301816	-51.9635	51.3599	1
pif3pif7_hAT	148.239			pifq_hAT-pif4_nAT	-181.865	-244.663	-119.066	0
pif3pif7_hAT	220.826			pifq_nAT-pif4_nAT	-54.3981	-105.305	-3.49094	0.022511
pif3pif7_hAT	181.332			pif7-1_nAT-pif7-1_hAT	102.507	41.1883	163.826	1.3e-06
pif3pif7_hAT	78.721			pif7-2_hAT-pif7-1_hAT	30.7732	-40.7259	102.272	0.989604
pif3pif7_hAT	90.2018			pif7-2_nAT-pif7-1_hAT	178.48	116.533	240.426	0
pif3pif7_hAT	130.648			pifq_hAT-pif7-1_hAT	-3.08342	-74.5826	68.4157	1
pif3pif7_hAT	-46.718			pifq_nAT-pif7-1_hAT	124.383	63.0643	185.702	0
pif3pif7_hAT	189.516			pif7-2_hAT-pif7-1_nAT	-71.7341	-134.233	-9.23545	0.0081606
pif3pif7_hAT	221.385			pif7-2_nAT-pif7-1_nAT	75.9722	24.6753	127.269	4.52e-05
pif3pif7_hAT	101.368			pifq_hAT-pif7-1_nAT	-105.591	-168.089	-43.0921	9e-07
pif3pif7_hAT	149.569			pifq_nAT-pif7-1_nAT	21.876	-28.6609	72.4129	0.988949
pif3pif7_hAT	195.984			pif7-2_nAT-pif7-2_hAT	147.706	84.5916	210.821	0
pif3pif7_hAT	51.7462			pifq_hAT-pif7-2_hAT	-33.8566	-106.37	38.6567	0.97605
pif3pif7_hAT	144.659			pifq_nAT-pif7-2_hAT	93.6101	31.1114	156.109	3.36e-05
pif3pif7_hAT	202.637			pifq_hAT-pif7-2_nAT	-181.563	-244.678	-118.448	0
Col-0_nAT	268.87			pifq_nAT-pif7-2_nAT	-54.0962	-105.393	-2.79936	0.0266628
Col-0_nAT	277.89			pifq_nAT-pifq_hAT	127.467	64.9681	189.965	0
Col-0_nAT	356.788
Col-0_nAT	315.837
Col-0_nAT	275.549
Col-0_nAT	252.492
Col-0_nAT	229.281
Col-0_nAT	235.044
Col-0_nAT	234.981
Col-0_nAT	310.019
Col-0_nAT	254.584
Col-0_nAT	316.71
Col-0_nAT	263.604
Col-0_nAT	303.525
Col-0_nAT	343.027
Col-0_nAT	311.021
Col-0_nAT	112.748
Col-0_nAT	415.006
Col-0_nAT	373.766
Col-0_nAT	314.385
Col-0_nAT	289.756
Col-0_nAT	255.634
Col-0_nAT	253.74
Col-0_nAT	226.316
Col-0_nAT	240.689
Col-0_nAT	304.638
Col-0_nAT	237.077
Col-0_nAT	320.918
Col-0_nAT	268.349
Col-0_nAT	332.357
Col-0_nAT	345.36
Col-0_nAT	311.017
Col-0_nAT	118.069
Col-0_nAT	434.253
35S::PIF4_nAT	108.709
35S::PIF4_nAT	113.813
35S::PIF4_nAT	152.751
35S::PIF4_nAT	158.42
35S::PIF4_nAT	175.035
35S::PIF4_nAT	99.9066
35S::PIF4_nAT	77.2402
35S::PIF4_nAT	153.122
35S::PIF4_nAT	165.296
35S::PIF4_nAT	61.6279
35S::PIF4_nAT	76.9086
35S::PIF4_nAT	47.7841
35S::PIF4_nAT	138.876
35S::PIF4_nAT	71.4769
35S::PIF4_nAT	112.491
35S::PIF4_nAT	156.34
35S::PIF4_nAT	88.7036
35S::PIF4_nAT	128.747
35S::PIF4_nAT	88.6128
35S::PIF4_nAT	157.488
35S::PIF4_nAT	142.204
35S::PIF4_nAT	106.191
35S::PIF4_nAT	75.9691
35S::PIF4_nAT	152.684
35S::PIF4_nAT	167.57
35S::PIF4_nAT	62.8674
35S::PIF4_nAT	85.0443
35S::PIF4_nAT	73.2809
35S::PIF4_nAT	141.627
35S::PIF4_nAT	102.165
35S::PIF4_nAT	184.197
35S::PIF4_nAT	117.765
35S::PIF4_nAT	47.9065
35S::PIF4_nAT	148.117
phyb_nAT	28.631
phyb_nAT	14.282
phyb_nAT	136.263
phyb_nAT	42.4551
phyb_nAT	30.1232
phyb_nAT	-8.1239
phyb_nAT	46.5762
phyb_nAT	37.3589
phyb_nAT	-9.39103
phyb_nAT	103.096
phyb_nAT	20.0413
phyb_nAT	0.963183
phyb_nAT	39.8181
phyb_nAT	23.1756
phyb_nAT	41.6853
phyb_nAT	-11.7793
phyb_nAT	-41.8866
phyb_nAT	69.0215
phyb_nAT	41.2748
phyb_nAT	85.6996
phyb_nAT	15.0004
phyb_nAT	55.3001
phyb_nAT	-10.7095
phyb_nAT	41.2432
phyb_nAT	35.022
phyb_nAT	-29.1284
phyb_nAT	65.228
phyb_nAT	26.9573
phyb_nAT	15.0399
phyb_nAT	14.6491
phyb_nAT	38.3339
phyb_nAT	25.6704
phyb_nAT	-24.8612
pif3_nAT	154.875
pif3_nAT	203.247
pif3_nAT	211.411
pif3_nAT	54.029
pif3_nAT	9.46604
pif3_nAT	208.786
pif3_nAT	233.371
pif3_nAT	99.9934
pif3_nAT	237.871
pif3_nAT	30.0363
pif3_nAT	240.737
pif3_nAT	140.194
pif3_nAT	256.459
pif3_nAT	75.077
pif3_nAT	89.9273
pif3_nAT	147.043
pif3_nAT	95.8604
pif3_nAT	318.644
pif3_nAT	141.619
pif3_nAT	204.633
pif3_nAT	95.5485
pif3_nAT	169.504
pif3_nAT	234.934
pif3_nAT	95.963
pif3_nAT	237.646
pif3_nAT	33.3482
pif3_nAT	256.85
pif3_nAT	131.526
pif3_nAT	267.579
pif3_nAT	80.4258
pif3_nAT	56.5949
pif3_nAT	178.765
pif3_nAT	96.8157
pif3_nAT	330.715
pif3_nAT	107.723
pif4_nAT	389.367
pif4_nAT	267.394
pif4_nAT	331.181
pif4_nAT	409.882
pif4_nAT	228.298
pif4_nAT	238.013
pif4_nAT	220.525
pif4_nAT	415.385
pif4_nAT	436.677
pif4_nAT	337.556
pif4_nAT	411.153
pif4_nAT	214.687
pif4_nAT	221.512
pif4_nAT	106.298
pif4_nAT	228.776
pif4_nAT	282.824
pif4_nAT	400.554
pif4_nAT	259.298
pif4_nAT	319.311
pif4_nAT	378.428
pif4_nAT	262.361
pif4_nAT	224.84
pif4_nAT	233.481
pif4_nAT	278.774
pif4_nAT	228.614
pif4_nAT	435.011
pif4_nAT	451.133
pif4_nAT	359.982
pif4_nAT	414.725
pif4_nAT	230.667
pif4_nAT	224.118
pif4_nAT	121.183
pif4_nAT	262.412
pif4_nAT	253.83
pif7-1_nAT	213.866
pif7-1_nAT	117.571
pif7-1_nAT	192.127
pif7-1_nAT	229.127
pif7-1_nAT	248.458
pif7-1_nAT	119.608
pif7-1_nAT	85.9601
pif7-1_nAT	292.847
pif7-1_nAT	193.691
pif7-1_nAT	190.217
pif7-1_nAT	155.325
pif7-1_nAT	161.515
pif7-1_nAT	267.118
pif7-1_nAT	139.393
pif7-1_nAT	386.682
pif7-1_nAT	251.675
pif7-1_nAT	173.823
pif7-1_nAT	217.032
pif7-1_nAT	242.355
pif7-1_nAT	192.723
pif7-1_nAT	198.996
pif7-1_nAT	165.589
pif7-1_nAT	238.822
pif7-1_nAT	222.535
pif7-1_nAT	269.557
pif7-1_nAT	168.604
pif7-1_nAT	189.672
pif7-1_nAT	268.306
pif7-1_nAT	191.35
pif7-1_nAT	326.677
pif7-1_nAT	194.737
pif7-1_nAT	292.093
pif7-1_nAT	307.157
pif7-1_nAT	304.22
pif7-1_nAT	295.65
pif7-2_nAT	335.831
pif7-2_nAT	262.349
pif7-2_nAT	385.873
pif7-2_nAT	355.016
pif7-2_nAT	206.796
pif7-2_nAT	211.261
pif7-2_nAT	319.228
pif7-2_nAT	313.824
pif7-2_nAT	311.515
pif7-2_nAT	287.704
pif7-2_nAT	267.354
pif7-2_nAT	244.716
pif7-2_nAT	256.795
pif7-2_nAT	312.711
pif7-2_nAT	256.712
pif7-2_nAT	364.474
pif7-2_nAT	429.082
pif7-2_nAT	289.512
pif7-2_nAT	271.006
pif7-2_nAT	356.583
pif7-2_nAT	307.851
pif7-2_nAT	196.304
pif7-2_nAT	210.179
pif7-2_nAT	284.751
pif7-2_nAT	326.76
pif7-2_nAT	302.72
pif7-2_nAT	280.444
pif7-2_nAT	243.867
pif7-2_nAT	233.797
pif7-2_nAT	372.468
pif7-2_nAT	244.447
pif7-2_nAT	332.768
pif7-2_nAT	397.175
pif3pif7_nAT	172.655
pif3pif7_nAT	195.337
pif3pif7_nAT	239.379
pif3pif7_nAT	346.699
pif3pif7_nAT	248.26
pif3pif7_nAT	237.973
pif3pif7_nAT	225.018
pif3pif7_nAT	272.644
pif3pif7_nAT	240.768
pif3pif7_nAT	225.981
pif3pif7_nAT	199.028
pif3pif7_nAT	286.113
pif3pif7_nAT	283.385
pif3pif7_nAT	266.249
pif3pif7_nAT	225.637
pif3pif7_nAT	206.599
pif3pif7_nAT	174.253
pif3pif7_nAT	278.98
pif3pif7_nAT	149.684
pif3pif7_nAT	190.829
pif3pif7_nAT	229.644
pif3pif7_nAT	341.985
pif3pif7_nAT	224.828
pif3pif7_nAT	228.681
pif3pif7_nAT	206.966
pif3pif7_nAT	255.429
pif3pif7_nAT	240.393
pif3pif7_nAT	236.781
pif3pif7_nAT	196.434
pif3pif7_nAT	295.018
pif3pif7_nAT	282.331
pif3pif7_nAT	270.986
pif3pif7_nAT	233.059
pif3pif7_nAT	223.948
pif3pif7_nAT	176.436
pif3pif7_nAT	291.908
pifq_nAT	315.127
pifq_nAT	294.288
pifq_nAT	190.193
pifq_nAT	253.945
pifq_nAT	288.213
pifq_nAT	296.25
pifq_nAT	201.98
pifq_nAT	217.115
pifq_nAT	236.114
pifq_nAT	213.175
pifq_nAT	290.171
pifq_nAT	294.572
pifq_nAT	271.278
pifq_nAT	170.156
pifq_nAT	258.934
pifq_nAT	246.555
pifq_nAT	137.455
pifq_nAT	228.732
pifq_nAT	272.498
pifq_nAT	247.349
pifq_nAT	217.589
pifq_nAT	228.673
pifq_nAT	327.005
pifq_nAT	262.009
pifq_nAT	174.834
pifq_nAT	168.45
pifq_nAT	257.849
pifq_nAT	295.97
pifq_nAT	285.722
pifq_nAT	274.752
pifq_nAT	204.787
pifq_nAT	262.724
pifq_nAT	205.525
pifq_nAT	157.725
pifq_nAT	223.024

## Sheet: Stat_Rosette_RGR_(20-27hAT_nAT)
Plant Info	RGR 20-27		Tukey multiple comparisons of means
Col-0_nAT	92.2596		95% family-wise confidence level
Col-0_nAT	94.9971
Col-0_nAT	87.3026		Fit: aov(formula = RGR.20.27 ~ Plant.Info, data = data)
Col-0_nAT	129.155		Significant differences are highlighted
Col-0_nAT	134.254		$Plant.Info	diff	lwr	upr	p adj
Col-0_nAT	131.946		35S::PIF4_nAT-35S::PIF4_hAT	20.1433	-1.7621	42.0486	0.116668
Col-0_nAT	139.546		Col-0_hAT-35S::PIF4_hAT	48.6795	28.6682	68.6908	0
Col-0_nAT	169.955		Col-0_nAT-35S::PIF4_hAT	108.761	86.4786	131.044	0
Col-0_nAT	156.97		phyb_hAT-35S::PIF4_hAT	-3.16126	-23.0723	16.7498	1
Col-0_nAT	117.246		phyb_nAT-35S::PIF4_hAT	51.9548	29.672	74.2376	0
Col-0_nAT	110.968		pif3_hAT-35S::PIF4_hAT	38.8929	19.1725	58.6134	0
Col-0_nAT	74.2369		pif3_nAT-35S::PIF4_hAT	59.2112	37.3059	81.1166	0
Col-0_nAT	149.638		pif3pif7_hAT-35S::PIF4_hAT	122.403	102.492	142.314	0
Col-0_nAT	114.716		pif3pif7_nAT-35S::PIF4_hAT	99.8542	77.9488	121.76	0
Col-0_nAT	150.763		pif4_hAT-35S::PIF4_hAT	102.276	82.646	121.906	0
Col-0_nAT	110.227		pif4_nAT-35S::PIF4_hAT	95.6806	73.7753	117.586	0
Col-0_nAT	158.748		pif7-1_hAT-35S::PIF4_hAT	129.474	109.659	149.288	0
Col-0_nAT	103.334		pif7-1_nAT-35S::PIF4_hAT	88.5537	66.6483	110.459	0
Col-0_nAT	80.8316		pif7-2_hAT-35S::PIF4_hAT	132.514	112.399	152.629	0
Col-0_nAT	127.753		pif7-2_nAT-35S::PIF4_hAT	88.1404	65.8576	110.423	0
Col-0_nAT	128.688		pifq_hAT-35S::PIF4_hAT	62.4443	42.5332	82.3553	0
Col-0_nAT	132.954		pifq_nAT-35S::PIF4_hAT	65.4473	43.5419	87.3526	0
Col-0_nAT	133.341		Col-0_hAT-35S::PIF4_nAT	28.5362	6.45239	50.6201	0.0009184
Col-0_nAT	173.653		Col-0_nAT-35S::PIF4_nAT	88.6182	64.4569	112.779	0
Col-0_nAT	154.941		phyb_hAT-35S::PIF4_nAT	-23.3045	-45.2975	-1.31148	0.024702
Col-0_nAT	113.532		phyb_nAT-35S::PIF4_nAT	31.8115	7.65023	55.9728	0.0006211
Col-0_nAT	107.464		pif3_hAT-35S::PIF4_nAT	18.7497	-3.07099	40.5703	0.202159
Col-0_nAT	78.7467		pif3_nAT-35S::PIF4_nAT	39.068	15.2543	62.8816	1.7e-06
Col-0_nAT	153.888		pif3pif7_hAT-35S::PIF4_nAT	102.26	80.2669	124.253	0
Col-0_nAT	110.156		pif3pif7_nAT-35S::PIF4_nAT	79.7109	55.8973	103.525	0
Col-0_nAT	157.19		pif4_hAT-35S::PIF4_nAT	82.1325	60.3938	103.871	0
Col-0_nAT	111.346		pif4_nAT-35S::PIF4_nAT	75.5374	51.7238	99.351	0
Col-0_nAT	149.749		pif7-1_hAT-35S::PIF4_nAT	109.33	87.4249	131.236	0
Col-0_nAT	103.277		pif7-1_nAT-35S::PIF4_nAT	68.4104	44.5968	92.2241	0
35S::PIF4_nAT	10.8492		pif7-2_hAT-35S::PIF4_nAT	112.371	90.1926	134.549	0
35S::PIF4_nAT	13.8478		pif7-2_nAT-35S::PIF4_nAT	67.9971	43.8358	92.1584	0
35S::PIF4_nAT	36.1999		pifq_hAT-35S::PIF4_nAT	42.301	20.308	64.2941	0
35S::PIF4_nAT	32.391		pifq_nAT-35S::PIF4_nAT	45.304	21.4904	69.1177	0
35S::PIF4_nAT	29.2633		Col-0_nAT-Col-0_hAT	60.082	37.6237	82.5403	0
35S::PIF4_nAT	5.10704		phyb_hAT-Col-0_hAT	-51.8407	-71.948	-31.7335	0
35S::PIF4_nAT	39.1597		phyb_nAT-Col-0_hAT	3.27528	-19.183	25.7336	1
35S::PIF4_nAT	31.1781		pif3_hAT-Col-0_hAT	-9.78658	-29.7051	10.132	0.96755
35S::PIF4_nAT	31.196		pif3_nAT-Col-0_hAT	10.5317	-11.5521	32.6156	0.975868
35S::PIF4_nAT	36.0446		pif3pif7_hAT-Col-0_hAT	73.7236	53.6164	93.8309	0
35S::PIF4_nAT	83.1546		pif3pif7_nAT-Col-0_hAT	51.1747	29.0908	73.2585	0
35S::PIF4_nAT	42.0786		pif4_hAT-Col-0_hAT	53.5963	33.7675	73.4251	0
35S::PIF4_nAT	52.1433		pif4_nAT-Col-0_hAT	47.0012	24.9173	69.085	0
35S::PIF4_nAT	46.3257		pif7-1_hAT-Col-0_hAT	80.794	60.7827	100.805	0
35S::PIF4_nAT	50.0345		pif7-1_nAT-Col-0_hAT	39.8742	17.7903	61.958	0
35S::PIF4_nAT	34.3557		pif7-2_hAT-Col-0_hAT	83.8343	63.5249	104.144	0
35S::PIF4_nAT	12.4695		pif7-2_nAT-Col-0_hAT	39.4609	17.0026	61.9192	1e-07
35S::PIF4_nAT	58.1572		pifq_hAT-Col-0_hAT	13.7648	-6.34245	33.872	0.623204
35S::PIF4_nAT	34.5751		pifq_nAT-Col-0_hAT	16.7678	-5.31605	38.8516	0.42093
35S::PIF4_nAT	31.3364		phyb_hAT-Col-0_nAT	-111.923	-134.292	-89.5537	0
35S::PIF4_nAT	32.4003		phyb_nAT-Col-0_nAT	-56.8067	-81.3107	-32.3027	0
35S::PIF4_nAT	18.0172		pif3_hAT-Col-0_nAT	-69.8685	-92.0681	-47.669	0
35S::PIF4_nAT	36.8899		pif3_nAT-Col-0_nAT	-49.5502	-73.7115	-25.3889	0
35S::PIF4_nAT	33.5977		pif3pif7_hAT-Col-0_nAT	13.6417	-8.72732	36.0107	0.807161
35S::PIF4_nAT	27.1706		pif3pif7_nAT-Col-0_nAT	-8.90729	-33.0686	15.254	0.998778
35S::PIF4_nAT	39.0512		pif4_hAT-Col-0_nAT	-6.48566	-28.6047	15.6334	0.999948
35S::PIF4_nAT	77.8075		pif4_nAT-Col-0_nAT	-13.0808	-37.2421	11.0805	0.921589
35S::PIF4_nAT	47.2779		pif7-1_hAT-Col-0_nAT	20.7121	-1.57072	42.9949	0.105779
35S::PIF4_nAT	45.2387		pif7-1_nAT-Col-0_nAT	-20.2078	-44.3691	3.95352	0.244012
35S::PIF4_nAT	48.269		pif7-2_hAT-Col-0_nAT	23.7523	1.20147	46.3032	0.0267079
35S::PIF4_nAT	48.0768		pif7-2_nAT-Col-0_nAT	-20.6211	-45.1251	3.88296	0.234103
35S::PIF4_nAT	25.9374		pifq_hAT-Col-0_nAT	-46.3172	-68.6862	-23.9482	0
35S::PIF4_nAT	13.0284		pifq_nAT-Col-0_nAT	-43.3142	-67.4754	-19.1529	1e-07
35S::PIF4_nAT	45.4956		phyb_nAT-phyb_hAT	55.116	32.747	77.485	0
35S::PIF4_nAT	27.8966		pif3_hAT-phyb_hAT	42.0542	22.2364	61.872	0
35S::PIF4_nAT	27.1318		pif3_nAT-phyb_hAT	62.3725	40.3795	84.3655	0
phyb_nAT	24.9552		pif3pif7_hAT-phyb_hAT	125.564	105.557	145.572	0
phyb_nAT	63.9763		pif3pif7_nAT-phyb_hAT	103.015	81.0224	125.008	0
phyb_nAT	64.0836		pif4_hAT-phyb_hAT	105.437	85.7094	125.165	0
phyb_nAT	88.5782		pif4_nAT-phyb_hAT	98.8419	76.8489	120.835	0
phyb_nAT	76.0996		pif7-1_hAT-phyb_hAT	132.635	112.724	152.546	0
phyb_nAT	65.8381		pif7-1_nAT-phyb_hAT	91.7149	69.7219	113.708	0
phyb_nAT	53.1026		pif7-2_hAT-phyb_hAT	135.675	115.464	155.886	0
phyb_nAT	81.9739		pif7-2_nAT-phyb_hAT	91.3016	68.9326	113.671	0
phyb_nAT	68.4559		pifq_hAT-phyb_hAT	65.6055	45.5981	85.613	0
phyb_nAT	52.9626		pifq_nAT-phyb_hAT	68.6086	46.6155	90.6016	0
phyb_nAT	76.2478		pif3_hAT-phyb_nAT	-13.0619	-35.2614	9.13768	0.849634
phyb_nAT	63.2208		pif3_nAT-phyb_nAT	7.25645	-16.9048	31.4177	0.999927
phyb_nAT	60.8496		pif3pif7_hAT-phyb_nAT	70.4484	48.0794	92.8174	0
phyb_nAT	72.5751		pif3pif7_nAT-phyb_nAT	47.8994	23.7381	72.0607	0
phyb_nAT	66.3289		pif4_hAT-phyb_nAT	50.321	28.202	72.4401	0
phyb_nAT	65.9445		pif4_nAT-phyb_nAT	43.7259	19.5646	67.8872	0
phyb_nAT	83.6327		pif7-1_hAT-phyb_nAT	77.5188	55.236	99.8016	0
phyb_nAT	18.2086		pif7-1_nAT-phyb_nAT	36.5989	12.4376	60.7602	1.97e-05
phyb_nAT	80.509		pif7-2_hAT-phyb_nAT	80.559	58.0082	103.11	0
phyb_nAT	57.4285		pif7-2_nAT-phyb_nAT	36.1856	11.6816	60.6896	3.97e-05
phyb_nAT	90.0512		pifq_hAT-phyb_nAT	10.4895	-11.8795	32.8585	0.979688
phyb_nAT	87.0543		pifq_nAT-phyb_nAT	13.4925	-10.6688	37.6538	0.898895
phyb_nAT	64.014		pif3_nAT-pif3_hAT	20.3183	-1.50233	42.139	0.104064
phyb_nAT	65.8918		pif3pif7_hAT-pif3_hAT	83.5102	63.6924	103.328	0
phyb_nAT	82.6012		pif3pif7_nAT-pif3_hAT	60.9613	39.1406	82.7819	0
phyb_nAT	60.2681		pif4_hAT-pif3_hAT	63.3829	43.8476	82.9181	0
phyb_nAT	62.1072		pif4_nAT-pif3_hAT	56.7877	34.9671	78.6084	0
phyb_nAT	73.6248		pif7-1_hAT-pif3_hAT	90.5806	70.8602	110.301	0
phyb_nAT	66.6518		pif7-1_nAT-pif3_hAT	49.6608	27.8401	71.4814	0
phyb_nAT	72.1202		pif7-2_hAT-pif3_hAT	93.6209	73.598	113.644	0
phyb_nAT	73.15		pif7-2_nAT-pif3_hAT	49.2475	27.0479	71.447	0
phyb_nAT	64.8372		pifq_hAT-pif3_hAT	23.5514	3.73357	43.3692	0.0044093
phyb_nAT	73.8441		pifq_nAT-pif3_hAT	26.5544	4.73374	48.375	0.0029079
phyb_nAT	91.1605		pif3pif7_hAT-pif3_nAT	63.1919	41.1989	85.1849	0
pif3_nAT	53.2526		pif3pif7_nAT-pif3_nAT	40.6429	16.8293	64.4566	4e-07
pif3_nAT	43.089		pif4_hAT-pif3_nAT	43.0646	21.3258	64.8033	0
pif3_nAT	62.1253		pif4_nAT-pif3_nAT	36.4694	12.6558	60.2831	1.44e-05
pif3_nAT	63.1304		pif7-1_hAT-pif3_nAT	70.2623	48.357	92.1677	0
pif3_nAT	79.577		pif7-1_nAT-pif3_nAT	29.3425	5.52883	53.1561	0.0023175
pif3_nAT	68.0558		pif7-2_hAT-pif3_nAT	73.3026	51.1246	95.4806	0
pif3_nAT	43.0035		pif7-2_nAT-pif3_nAT	28.9292	4.76788	53.0905	0.0038752
pif3_nAT	88.5628		pifq_hAT-pif3_nAT	3.23305	-18.76	25.2261	1
pif3_nAT	66.786		pifq_nAT-pif3_nAT	6.23607	-17.5776	30.0497	0.999991
pif3_nAT	123.974		pif3pif7_nAT-pif3pif7_hAT	-22.549	-44.542	-0.555943	0.037366
pif3_nAT	93.449		pif4_hAT-pif3pif7_hAT	-20.1273	-39.855	-0.399737	0.039625
pif3_nAT	84.6822		pif4_nAT-pif3pif7_hAT	-26.7225	-48.7155	-4.72946	0.0029905
pif3_nAT	76.6886		pif7-1_hAT-pif3pif7_hAT	7.0704	-12.8406	26.9814	0.999251
pif3_nAT	66.016		pif7-1_nAT-pif3pif7_hAT	-33.8495	-55.8425	-11.8564	1.25e-05
pif3_nAT	67.0763		pif7-2_hAT-pif3pif7_hAT	10.1107	-10.0999	30.3212	0.961403
pif3_nAT	94.2602		pif7-2_nAT-pif3pif7_hAT	-34.2628	-56.6318	-11.8937	1.44e-05
pif3_nAT	83.1517		pifq_hAT-pif3pif7_hAT	-59.9589	-79.9663	-39.9514	0
pif3_nAT	67.873		pifq_nAT-pif3pif7_hAT	-56.9558	-78.9489	-34.9628	0
pif3_nAT	57.2036		pif4_hAT-pif3pif7_nAT	2.42163	-19.3171	24.1604	1
pif3_nAT	93.1207		pif4_nAT-pif3pif7_nAT	-4.17352	-27.9871	19.6401	1
pif3_nAT	72.34		pif7-1_hAT-pif3pif7_nAT	29.6194	7.71402	51.5247	0.0003469
pif3_nAT	70.4018		pif7-1_nAT-pif3pif7_nAT	-11.3005	-35.1141	12.5131	0.977053
pif3_nAT	46.1842		pif7-2_hAT-pif3pif7_nAT	32.6596	10.4817	54.8376	4.28e-05
pif3_nAT	84.9012		pif7-2_nAT-pif3pif7_nAT	-11.7138	-35.8751	12.4475	0.971539
pif3_nAT	69.0315		pifq_hAT-pif3pif7_nAT	-37.4099	-59.4029	-15.4169	5e-07
pif3_nAT	117.678		pifq_nAT-pif3pif7_nAT	-34.4069	-58.2205	-10.5932	7.04e-05
pif3_nAT	86.7315		pif4_nAT-pif4_hAT	-6.59514	-28.3339	15.1436	0.999915
pif3_nAT	82.5462		pif7-1_hAT-pif4_hAT	27.1977	7.56793	46.8276	0.0001978
pif3_nAT	68.7265		pif7-1_nAT-pif4_hAT	-13.7221	-35.4609	8.01666	0.759473
pif3_nAT	70.4019		pif7-2_hAT-pif4_hAT	30.238	10.3044	50.1716	1.89e-05
pif3_nAT	67.1485		pif7-2_nAT-pif4_hAT	-14.1354	-36.2545	7.98366	0.740819
pif3_nAT	88.5879		pifq_hAT-pif4_hAT	-39.8315	-59.5591	-20.1039	0
pif3_nAT	72.4582		pifq_nAT-pif4_hAT	-36.8285	-58.5673	-15.0897	6e-07
pif3_nAT	80.2467		pif7-1_hAT-pif4_nAT	33.7929	11.8875	55.6982	1.17e-05
pif3_nAT	64.6277		pif7-1_nAT-pif4_nAT	-7.12697	-30.9406	16.6867	0.99993
pif3_nAT	92.511		pif7-2_hAT-pif4_nAT	36.8331	14.6552	59.0111	1.1e-06
pif4_nAT	113.205		pif7-2_nAT-pif4_nAT	-7.54026	-31.7015	16.621	0.999873
pif4_nAT	130.643		pifq_hAT-pif4_nAT	-33.2364	-55.2294	-11.2433	2.11e-05
pif4_nAT	112.446		pifq_nAT-pif4_nAT	-30.2334	-54.047	-6.41973	0.001309
pif4_nAT	131.258		pif7-1_nAT-pif7-1_hAT	-40.9199	-62.8252	-19.0145	0
pif4_nAT	154.06		pif7-2_hAT-pif7-1_hAT	3.04026	-17.0749	23.1554	1
pif4_nAT	109.575		pif7-2_nAT-pif7-1_hAT	-41.3331	-63.616	-19.0503	0
pif4_nAT	151.977		pifq_hAT-pif7-1_hAT	-67.0293	-86.9403	-47.1182	0
pif4_nAT	82.1345		pifq_nAT-pif7-1_hAT	-64.0262	-85.9316	-42.1209	0
pif4_nAT	86.3071		pif7-2_hAT-pif7-1_nAT	43.9601	21.7821	66.1381	0
pif4_nAT	102.94		pif7-2_nAT-pif7-1_nAT	-0.413293	-24.5746	23.748	1
pif4_nAT	58.7776		pifq_hAT-pif7-1_nAT	-26.1094	-48.1024	-4.11638	0.0044877
pif4_nAT	104.227		pifq_nAT-pif7-1_nAT	-23.1064	-46.92	0.707237	0.0693582
pif4_nAT	111.024		pif7-2_nAT-pif7-2_hAT	-44.3734	-66.9243	-21.8225	0
pif4_nAT	113.671		pifq_hAT-pif7-2_hAT	-70.0695	-90.2801	-49.8589	0
pif4_nAT	137.038		pifq_nAT-pif7-2_hAT	-67.0665	-89.2445	-44.8885	0
pif4_nAT	101.226		pifq_hAT-pif7-2_nAT	-25.6961	-48.0651	-3.32711	0.0077062
pif4_nAT	98.8544		pifq_nAT-pif7-2_nAT	-22.6931	-46.8544	1.46819	0.0959377
pif4_nAT	117.846		pifq_nAT-pifq_hAT	3.00302	-18.99	24.996	1
pif4_nAT	113.751
pif4_nAT	135.747
pif4_nAT	111.474
pif4_nAT	134.234
pif4_nAT	161.078
pif4_nAT	105.124
pif4_nAT	144.889
pif4_nAT	79.4083
pif4_nAT	75.6676
pif4_nAT	101.798
pif4_nAT	61.2851
pif4_nAT	100.02
pif4_nAT	105.779
pif4_nAT	115.19
pif4_nAT	140.328
pif4_nAT	102.168
pif4_nAT	100.591
pif4_nAT	116.76
pif7-1_nAT	89.7903
pif7-1_nAT	168.654
pif7-1_nAT	118.553
pif7-1_nAT	92.5179
pif7-1_nAT	117.651
pif7-1_nAT	79.7766
pif7-1_nAT	114.671
pif7-1_nAT	83.5117
pif7-1_nAT	92.0935
pif7-1_nAT	87.7061
pif7-1_nAT	101.91
pif7-1_nAT	121.523
pif7-1_nAT	106.669
pif7-1_nAT	111.229
pif7-1_nAT	59.7937
pif7-1_nAT	93.3207
pif7-1_nAT	176.545
pif7-1_nAT	124.041
pif7-1_nAT	101.311
pif7-1_nAT	125.386
pif7-1_nAT	86.7458
pif7-1_nAT	119.811
pif7-1_nAT	85.8719
pif7-1_nAT	95.2235
pif7-1_nAT	95.6808
pif7-1_nAT	112.865
pif7-1_nAT	131.466
pif7-1_nAT	112.516
pif7-1_nAT	118.996
pif7-1_nAT	62.8416
pif7-1_nAT	132.232
pif7-1_nAT	138.125
pif7-1_nAT	80.3594
pif7-1_nAT	85.665
pif7-1_nAT	67.6355
pif7-1_nAT	73.2399
pif7-2_nAT	80.8673
pif7-2_nAT	104.633
pif7-2_nAT	83.8868
pif7-2_nAT	92.2358
pif7-2_nAT	114.222
pif7-2_nAT	109.024
pif7-2_nAT	99.1652
pif7-2_nAT	103.209
pif7-2_nAT	83.6157
pif7-2_nAT	121.203
pif7-2_nAT	86.4158
pif7-2_nAT	91.9301
pif7-2_nAT	96.5738
pif7-2_nAT	134.367
pif7-2_nAT	87.7028
pif7-2_nAT	97.9009
pif7-2_nAT	87.8165
pif7-2_nAT	111.259
pif7-2_nAT	89.9865
pif7-2_nAT	101.87
pif7-2_nAT	123.237
pif7-2_nAT	116.564
pif7-2_nAT	104.184
pif7-2_nAT	111.902
pif7-2_nAT	91.1243
pif7-2_nAT	128.598
pif7-2_nAT	92.5089
pif7-2_nAT	99.6742
pif7-2_nAT	102.094
pif7-2_nAT	141.221
pif7-2_nAT	95.5872
pif7-2_nAT	103.242
pif7-2_nAT	122.432
pif7-2_nAT	132.405
pif3pif7_nAT	148.224
pif3pif7_nAT	92.121
pif3pif7_nAT	152.413
pif3pif7_nAT	124.273
pif3pif7_nAT	171.704
pif3pif7_nAT	106.443
pif3pif7_nAT	95.7837
pif3pif7_nAT	117.006
pif3pif7_nAT	85.1704
pif3pif7_nAT	121.836
pif3pif7_nAT	98.6191
pif3pif7_nAT	105.556
pif3pif7_nAT	129.771
pif3pif7_nAT	112.437
pif3pif7_nAT	96.8555
pif3pif7_nAT	77.4031
pif3pif7_nAT	108.002
pif3pif7_nAT	83.7074
pif3pif7_nAT	158.368
pif3pif7_nAT	96.7767
pif3pif7_nAT	162.588
pif3pif7_nAT	133.575
pif3pif7_nAT	178.615
pif3pif7_nAT	109.088
pif3pif7_nAT	98.7796
pif3pif7_nAT	124.211
pif3pif7_nAT	92.8981
pif3pif7_nAT	128.105
pif3pif7_nAT	102.62
pif3pif7_nAT	113.085
pif3pif7_nAT	139.562
pif3pif7_nAT	117.648
pif3pif7_nAT	104.078
pif3pif7_nAT	81.7005
pif3pif7_nAT	113.858
pif3pif7_nAT	89.867
pifq_nAT	64.1124
pifq_nAT	62.0915
pifq_nAT	115.531
pifq_nAT	87.6406
pifq_nAT	79.4286
pifq_nAT	50.1868
pifq_nAT	66.5429
pifq_nAT	71.861
pifq_nAT	108.151
pifq_nAT	60.9422
pifq_nAT	76.7487
pifq_nAT	94.3122
pifq_nAT	85.9778
pifq_nAT	96.3426
pifq_nAT	59.9625
pifq_nAT	60.6686
pifq_nAT	113.718
pifq_nAT	87.1968
pifq_nAT	93.8955
pifq_nAT	107.984
pifq_nAT	73.3892
pifq_nAT	96.0749
pifq_nAT	57.4485
pifq_nAT	58.7178
pifq_nAT	80.9741
pifq_nAT	103.344
pifq_nAT	63.932
pifq_nAT	78.3699
pifq_nAT	82.7586
pifq_nAT	84.4041
pifq_nAT	95.8976
pifq_nAT	58.3592
pifq_nAT	59.4517
pifq_nAT	116.477
pifq_nAT	87.0728
pifq_nAT	94.1321
Col-0_hAT	75.5065
Col-0_hAT	73.4803
Col-0_hAT	50.9554
Col-0_hAT	53.5915
Col-0_hAT	53.9574
Col-0_hAT	45.7029
Col-0_hAT	80.1492
Col-0_hAT	93.2117
Col-0_hAT	78.3866
Col-0_hAT	60.7758
Col-0_hAT	54.5633
Col-0_hAT	49.6964
Col-0_hAT	82.8522
Col-0_hAT	32.1368
Col-0_hAT	53.2649
Col-0_hAT	76.3642
Col-0_hAT	29.7407
Col-0_hAT	67.012
Col-0_hAT	59.7214
Col-0_hAT	63.2034
Col-0_hAT	39.0103
Col-0_hAT	62.4716
Col-0_hAT	77.5131
Col-0_hAT	92.4759
Col-0_hAT	78.2252
Col-0_hAT	77.761
Col-0_hAT	49.7318
Col-0_hAT	52.0216
Col-0_hAT	68.7825
Col-0_hAT	58.9935
Col-0_hAT	51.3016
Col-0_hAT	63.5929
Col-0_hAT	73.4685
Col-0_hAT	51.7895
Col-0_hAT	56.8492
Col-0_hAT	74.6213
Col-0_hAT	49.7672
Col-0_hAT	43.6097
Col-0_hAT	70.3602
Col-0_hAT	82.2778
Col-0_hAT	97.3075
Col-0_hAT	81.6758
Col-0_hAT	86.7709
Col-0_hAT	56.8414
Col-0_hAT	58.5961
Col-0_hAT	73.9445
Col-0_hAT	73.0278
Col-0_hAT	52.9738
Col-0_hAT	69.2153
Col-0_hAT	77.4974
35S::PIF4_hAT	5.98827
35S::PIF4_hAT	0.141641
35S::PIF4_hAT	#VALUE!
35S::PIF4_hAT	9.04143
35S::PIF4_hAT	30.5119
35S::PIF4_hAT	15.0179
35S::PIF4_hAT	15.6513
35S::PIF4_hAT	21.9819
35S::PIF4_hAT	21.4193
35S::PIF4_hAT	6.58631
35S::PIF4_hAT	#VALUE!
35S::PIF4_hAT	42.4333
35S::PIF4_hAT	54.8033
35S::PIF4_hAT	32.8725
35S::PIF4_hAT	4.99678
35S::PIF4_hAT	12.9798
35S::PIF4_hAT	14.109
35S::PIF4_hAT	23.3865
35S::PIF4_hAT	-5.12269
35S::PIF4_hAT	15.8992
35S::PIF4_hAT	19.0822
35S::PIF4_hAT	1.32592
35S::PIF4_hAT	12.3306
35S::PIF4_hAT	-2.48265
35S::PIF4_hAT	3.6748
35S::PIF4_hAT	4.17448
35S::PIF4_hAT	24.3741
35S::PIF4_hAT	44.7468
35S::PIF4_hAT	10.3595
35S::PIF4_hAT	18.0042
35S::PIF4_hAT	15.6395
35S::PIF4_hAT	1.64855
35S::PIF4_hAT	36.2916
35S::PIF4_hAT	43.7553
35S::PIF4_hAT	-11.7129
35S::PIF4_hAT	18.9445
35S::PIF4_hAT	-3.7771
35S::PIF4_hAT	18.0829
35S::PIF4_hAT	17.1661
35S::PIF4_hAT	1.17247
35S::PIF4_hAT	12.252
35S::PIF4_hAT	-1.32985
35S::PIF4_hAT	9.37979
35S::PIF4_hAT	4.54825
35S::PIF4_hAT	24.8659
35S::PIF4_hAT	45.817
35S::PIF4_hAT	8.73847
35S::PIF4_hAT	18.795
35S::PIF4_hAT	13.7274
35S::PIF4_hAT	0.535089
35S::PIF4_hAT	38.9002
35S::PIF4_hAT	47.556
35S::PIF4_hAT	-3.52529
35S::PIF4_hAT	19.1255
phyb_hAT	30.6417
phyb_hAT	17.0992
phyb_hAT	15.191
phyb_hAT	29.3
phyb_hAT	16.0684
phyb_hAT	17.5438
phyb_hAT	16.4382
phyb_hAT	11.7051
phyb_hAT	22.5524
phyb_hAT	13.0979
phyb_hAT	16.2179
phyb_hAT	15.431
phyb_hAT	-1.68002
phyb_hAT	3.74169
phyb_hAT	18.5392
phyb_hAT	17.9569
phyb_hAT	29.0286
phyb_hAT	10.7372
phyb_hAT	20.1366
phyb_hAT	11.2172
phyb_hAT	3.60791
phyb_hAT	15.1674
phyb_hAT	7.19616
phyb_hAT	-7.09779
phyb_hAT	4.24136
phyb_hAT	9.28143
phyb_hAT	10.0368
phyb_hAT	7.63288
phyb_hAT	14.7582
phyb_hAT	-0.503613
phyb_hAT	8.42371
phyb_hAT	15.8127
phyb_hAT	16.1432
phyb_hAT	16.6507
phyb_hAT	30.6024
phyb_hAT	26.7387
phyb_hAT	14.7936
phyb_hAT	6.90894
phyb_hAT	19.8573
phyb_hAT	10.1391
phyb_hAT	7.94764
phyb_hAT	-2.27806
phyb_hAT	3.08463
phyb_hAT	11.1503
phyb_hAT	10.1509
phyb_hAT	7.66042
phyb_hAT	12.7713
phyb_hAT	-2.69905
phyb_hAT	10.8631
phyb_hAT	18.2206
phyb_hAT	19.3773
pif4_hAT	143.978
pif4_hAT	108.387
pif4_hAT	82.1991
pif4_hAT	169.69
pif4_hAT	151.812
pif4_hAT	105.9
pif4_hAT	117.527
pif4_hAT	116.638
pif4_hAT	126.19
pif4_hAT	132.135
pif4_hAT	126.21
pif4_hAT	109.099
pif4_hAT	125.699
pif4_hAT	110.453
pif4_hAT	117.708
pif4_hAT	86.0745
pif4_hAT	98.0786
pif4_hAT	87.0542
pif4_hAT	127.8
pif4_hAT	152.485
pif4_hAT	141.842
pif4_hAT	135.468
pif4_hAT	97.3035
pif4_hAT	98.3225
pif4_hAT	91.7284
pif4_hAT	129.975
pif4_hAT	92.0628
pif4_hAT	123.964
pif4_hAT	157.163
pif4_hAT	146.15
pif4_hAT	93.0267
pif4_hAT	167.345
pif4_hAT	124.585
pif4_hAT	82.9112
pif4_hAT	92.7867
pif4_hAT	89.2064
pif4_hAT	138.852
pif4_hAT	111.633
pif4_hAT	148.157
pif4_hAT	135.826
pif4_hAT	98.9363
pif4_hAT	98.3816
pif4_hAT	93.2038
pif4_hAT	126.041
pif4_hAT	95.2615
pif4_hAT	122.394
pif4_hAT	156.506
pif4_hAT	147.869
pif4_hAT	98.4681
pif4_hAT	164.009
pif4_hAT	125.565
pif4_hAT	82.7971
pif4_hAT	99.0898
pif4_hAT	87.9434
pifq_hAT	109.658
_hAT	-11.3274
pifq_hAT	71.1629
pifq_hAT	101.128
pifq_hAT	114.238
pifq_hAT	123.102
pifq_hAT	20.8252
pifq_hAT	160.121
pifq_hAT	9.61979
pifq_hAT	125.958
pifq_hAT	28.0489
pifq_hAT	78.1544
pifq_hAT	115.693
pifq_hAT	114.741
pifq_hAT	61.2047
pifq_hAT	-7.02697
pifq_hAT	85.567
pifq_hAT	80.0233
pifq_hAT	52.9974
pifq_hAT	134.72
pifq_hAT	113.84
pifq_hAT	33.203
pifq_hAT	99.074
pifq_hAT	67.8658
pifq_hAT	105.633
pifq_hAT	115.685
pifq_hAT	18.555
pifq_hAT	28.7099
pifq_hAT	78.8744
pifq_hAT	10.7057
pifq_hAT	103.068
pifq_hAT	32.1801
pifq_hAT	67.7399
pifq_hAT	110.862
pifq_hAT	98.5507
pifq_hAT	118.282
pifq_hAT	126.403
pifq_hAT	116.083
pifq_hAT	32.1132
pifq_hAT	97.8032
pifq_hAT	93.9946
pifq_hAT	81.2194
pifq_hAT	142.039
pifq_hAT	-7.27091
pifq_hAT	37.3972
pifq_hAT	83.4109
pifq_hAT	19.0153
pifq_hAT	101.203
pifq_hAT	37.2398
pifq_hAT	70.1163
pifq_hAT	86.5191
pifq_hAT	103.437
_hAT	-22.4737
pif3_hAT	97.1461
pif3_hAT	78.6974
pif3_hAT	46.7612
pif3_hAT	36.5395
pif3_hAT	62.3418
pif3_hAT	63.7739
pif3_hAT	1.07805
pif3_hAT	65.7057
pif3_hAT	73.5235
pif3_hAT	35.1034
pif3_hAT	40.1867
pif3_hAT	33.6083
pif3_hAT	42.095
pif3_hAT	86.8024
pif3_hAT	52.5449
pif3_hAT	78.599
pif3_hAT	40.171
pif3_hAT	56.3732
pif3_hAT	70.5019
pif3_hAT	46.7494
pif3_hAT	29.2017
pif3_hAT	97.5553
pif3_hAT	83.6352
pif3_hAT	43.413
pif3_hAT	14.1759
pif3_hAT	22.4737
pif3_hAT	40.352
pif3_hAT	48.6734
pif3_hAT	49.1888
pif3_hAT	61.7477
pif3_hAT	75.5537
pif3_hAT	48.7167
pif3_hAT	66.2172
pif3_hAT	57.5771
pif3_hAT	66.3864
pif3_hAT	75.7898
pif3_hAT	61.7044
pif3_hAT	33.9112
pif3_hAT	95.7848
pif3_hAT	84.8588
pif3_hAT	48.8741
pif3_hAT	12.4526
pif3_hAT	18.6652
pif3_hAT	24.8659
pif3_hAT	45.5809
pif3_hAT	48.5711
pif3_hAT	53.4853
pif3_hAT	65.3477
pif3_hAT	72.8586
pif3_hAT	51.0616
pif3_hAT	68.6448
pif3_hAT	62.3811
pif3_hAT	74.2554
pif7-1_hAT	190.429
pif7-1_hAT	-1.70363
pif7-1_hAT	137.899
pif7-1_hAT	131.498
pif7-1_hAT	101.714
pif7-1_hAT	110.409
pif7-1_hAT	228.125
pif7-1_hAT	154.212
pif7-1_hAT	130.117
pif7-1_hAT	156.647
pif7-1_hAT	140.567
pif7-1_hAT	142.137
pif7-1_hAT	120.568
pif7-1_hAT	178.251
pif7-1_hAT	206.202
pif7-1_hAT	149.329
pif7-1_hAT	223.474
pif7-1_hAT	150.942
pif7-1_hAT	140.178
pif7-1_hAT	-2.12462
pif7-1_hAT	136.723
pif7-1_hAT	129.189
pif7-1_hAT	98.9914
pif7-1_hAT	170.005
pif7-1_hAT	214.456
pif7-1_hAT	235.093
pif7-1_hAT	156.112
pif7-1_hAT	132.694
pif7-1_hAT	114.344
pif7-1_hAT	137.113
pif7-1_hAT	156.785
pif7-1_hAT	190.822
pif7-1_hAT	175.183
pif7-1_hAT	166.251
pif7-1_hAT	131.671
pif7-1_hAT	19.2829
pif7-1_hAT	137.797
pif7-1_hAT	116.846
pif7-1_hAT	112.357
pif7-1_hAT	179.92
pif7-1_hAT	146.807
pif7-1_hAT	194.371
pif7-1_hAT	178.727
pif7-1_hAT	145.041
pif7-1_hAT	152.075
pif7-1_hAT	130.75
pif7-1_hAT	110.177
pif7-1_hAT	137.738
pif7-1_hAT	151.367
pif7-1_hAT	189.441
pif7-1_hAT	172.853
pif7-1_hAT	157.654
pif7-2_hAT	155.384
pif7-2_hAT	187.737
pif7-2_hAT	202.338
pif7-2_hAT	174.093
pif7-2_hAT	149.42
pif7-2_hAT	157.241
pif7-2_hAT	57.7424
pif7-2_hAT	104.952
pif7-2_hAT	182.343
pif7-2_hAT	157.292
pif7-2_hAT	66.709
pif7-2_hAT	92.232
pif7-2_hAT	135.995
pif7-2_hAT	159.173
pif7-2_hAT	140.386
pif7-2_hAT	197.267
pif7-2_hAT	149.305
pif7-2_hAT	189.276
pif7-2_hAT	175.316
pif7-2_hAT	190.401
pif7-2_hAT	236.966
pif7-2_hAT	172.436
pif7-2_hAT	138.517
pif7-2_hAT	48.2052
pif7-2_hAT	75.6521
pif7-2_hAT	133.261
pif7-2_hAT	128.221
pif7-2_hAT	202.972
pif7-2_hAT	116.539
pif7-2_hAT	163.336
pif7-2_hAT	198.506
pif7-2_hAT	177.272
pif7-2_hAT	149.121
pif7-2_hAT	193.706
pif7-2_hAT	212.887
pif7-2_hAT	226.189
pif7-2_hAT	42.63
pif7-2_hAT	124.727
pif7-2_hAT	175.722
pif7-2_hAT	131.219
pif7-2_hAT	45.813
pif7-2_hAT	69.7976
pif7-2_hAT	127.756
pif7-2_hAT	124.664
pif7-2_hAT	200.812
pif7-2_hAT	112.884
pif7-2_hAT	162.226
pif7-2_hAT	189.803
pif7-2_hAT	173.451
pif3pif7_hAT	119.238
pif3pif7_hAT	72.6068
pif3pif7_hAT	147.692
pif3pif7_hAT	165.421
pif3pif7_hAT	186.703
pif3pif7_hAT	75.6757
pif3pif7_hAT	109.099
pif3pif7_hAT	86.047
pif3pif7_hAT	120.037
pif3pif7_hAT	151.898
pif3pif7_hAT	171.193
pif3pif7_hAT	161.215
pif3pif7_hAT	114.104
pif3pif7_hAT	172.007
pif3pif7_hAT	151.894
pif3pif7_hAT	174.769
pif3pif7_hAT	189.921
pif3pif7_hAT	135.366
pif3pif7_hAT	54.3312
pif3pif7_hAT	141.315
pif3pif7_hAT	155.435
pif3pif7_hAT	169.419
pif3pif7_hAT	173.432
pif3pif7_hAT	151.89
pif3pif7_hAT	178.271
pif3pif7_hAT	72.7603
pif3pif7_hAT	109.906
pif3pif7_hAT	187.501
pif3pif7_hAT	163.67
pif3pif7_hAT	180.427
pif3pif7_hAT	189.024
pif3pif7_hAT	90.4379
pif3pif7_hAT	85.5709
pif3pif7_hAT	66.9136
pif3pif7_hAT	133.532
pif3pif7_hAT	150.415
pif3pif7_hAT	179.558
pif3pif7_hAT	118.577
pif3pif7_hAT	148.094
pif3pif7_hAT	123.365
pif3pif7_hAT	171.468
pif3pif7_hAT	143.093
pif3pif7_hAT	172.853
pif3pif7_hAT	64.4782
pif3pif7_hAT	103.056
pif3pif7_hAT	184.295
pif3pif7_hAT	160.971
pif3pif7_hAT	178.007
pif3pif7_hAT	185.499
pif3pif7_hAT	87.2863
pif3pif7_hAT	81.6482
