# Supplementary material for: Integrative phenotyping approaches to unmask the Phyb-PIF4 pathway in Arabidopsis thaliana reproductive organs at high ambient temperatures
Source: Research Square preprint supplement (doi:10.21203/rs.3.rs-4223427/v1), 2024-04-15
Supplement: Supplementary file 11 [file e98324510ef90f20bb671f1f.xlsx]

## Sheet: UP Col-0 hAT vs nAT
gene_id	COL_HT	COL_NC	log2FoldChange	pvalue	padj	gene_name	gene_chr	gene_length	gene_description	tf_family
AT2G18440	5386.22	680.509	2.98789	0	0	GUT15	2	1696	GUT15 (GENE WITH UNSTABLE TRANSCRIPT 15); other RNA [Source:TAIR;Acc:AT2G18440]	-
AT4G11830	2911.68	380.473	2.93704	0	0	PLDGAMMA2	4	4723	Phospholipase D gamma 2 [Source:UniProtKB/Swiss-Prot;Acc:Q9T051]	C2
AT1G53780	3277.99	270.778	3.59283	6.18549e-296	1.27416e-292	-	1	3522	26S proteasome regulatory complex ATPase [Source:UniProtKB/TrEMBL;Acc:F4HTC3]	AAA
AT4G33270	2500.79	620.181	2.00963	5.11243e-226	4.51336e-223	CDC20-1	4	2097	Cell division cycle 20.1, cofactor of APC complex [Source:UniProtKB/Swiss-Prot;Acc:Q9SZA4]	WD40
AT2G23790	3011.24	773.088	1.95982	1.48704e-219	1.14869e-216	-	2	1470	Calcium uniporter protein 2, mitochondrial [Source:UniProtKB/Swiss-Prot;Acc:O64823]	-
AT5G25560	4789.8	405.598	3.55776	3.11719e-219	2.33496e-216	-	5	2995	CHY-type/CTCHY-type/RING-type Zinc finger protein [Source:UniProtKB/TrEMBL;Acc:F4JY59]	zf-CHY
AT1G76720	947.432	39.786	4.5791	7.44566e-206	4.38213e-203	-	1	4342	Eukaryotic translation initiation factor 2 (eIF-2) family protein [Source:UniProtKB/TrEMBL;Acc:Q9SRE1]	GTP_EFTU
AT1G26580	3878.98	642.974	2.59187	1.23296e-190	5.75047e-188	-	1	3012	At1g26580 [Source:UniProtKB/TrEMBL;Acc:Q9FZE2]	-
AT5G40910	1757.18	376.634	2.22273	4.2848e-185	1.85817e-182	-	5	5048	Disease resistance protein (TIR-NBS-LRR class) family [Source:UniProtKB/TrEMBL;Acc:Q9FKR7]	NB-ARC
AT2G25590	982.822	56.4454	4.08757	7.86665e-177	3.1878e-174	-	2	1312	Plant Tudor-like protein [Source:UniProtKB/TrEMBL;Acc:Q9SLA4]	Agenet
AT3G60970	826.088	89.0527	3.219	3.72389e-176	1.46112e-173	ABCC15	3	3556	Putative ABC transporter C family member 15 [Source:UniProtKB/Swiss-Prot;Acc:Q7FB56]	ABC_tran
AT2G33830	1961.29	143.052	3.79063	4.12465e-176	1.59308e-173	DRMH1	2	1119	DRM2 [Source:UniProtKB/TrEMBL;Acc:A0A178VR62]	-
AT5G65050	1892.72	424.137	2.15087	2.52893e-168	8.6823e-166	AGL31	5	3384	Agamous-like MADS-box protein AGL31 [Source:UniProtKB/Swiss-Prot;Acc:Q9FPN7]	SRF-TF
AT1G30970	1783.73	471.187	1.91741	5.75461e-167	1.92227e-164	SUF4	1	2170	zinc finger (C2H2 type) family protein [Source:TAIR;Acc:AT1G30970]	-
AT1G30590	2106.08	659.957	1.67397	6.83758e-161	2.11273e-158	-	1	3241	RNA polymerase I specific transcription initiation factor RRN3 protein [Source:TAIR;Acc:AT1G30590]	RRN3
AT3G17150	701.025	57.2026	3.63808	4.58529e-158	1.33346e-155	-	3	641	Plant invertase/pectin methylesterase inhibitor superfamily protein [Source:UniProtKB/TrEMBL;Acc:Q0WR80]	-
AT5G55100	1213.04	135.412	3.15733	8.31281e-158	2.38935e-155	-	5	3509	SWAP (Suppressor-of-White-APricot)/surp domain-containing protein [Source:UniProtKB/TrEMBL;Acc:Q94BN8]	-
AT3G05460	766.569	114.351	2.75376	3.24405e-157	9.11246e-155	-	3	681	Sporozoite surface protein-like protein [Source:UniProtKB/TrEMBL;Acc:Q8L9R7]	-
AT4G36648	1508.36	321.992	2.22952	7.3477e-157	2.01809e-154	-	4	2105	other RNA [Source:TAIR;Acc:AT4G36648]	-
AT2G36325	828.411	18.2465	5.47203	1.96388e-156	5.27665e-154	-	2	1191	GDSL esterase/lipase At2g36325 [Source:UniProtKB/Swiss-Prot;Acc:Q8RWJ4]	Lipase_GDSL
AT5G22700	1064.74	126.563	3.05322	6.3524e-156	1.67048e-153	-	5	3097	F-box/RNI-like/FBD-like domains-containing protein [Source:TAIR;Acc:AT5G22700]	F-box
AT2G42330	798.368	67.5331	3.57039	3.01368e-154	7.67991e-152	STIPL2	2	3380	Septin and tuftelin-interacting protein 1 homolog 2 [Source:UniProtKB/Swiss-Prot;Acc:Q9SLC6]	G-patch
AT4G00060	1053.52	140.652	2.90378	4.15815e-154	1.04883e-151	MEE44	4	5502	Nucleotidyltransferase family protein [Source:UniProtKB/TrEMBL;Acc:F4JH01]	NTP_transf_2
AT1G60260	1355.86	204.416	2.73256	3.93273e-153	9.72132e-151	BGLU5	1	1634	beta glucosidase 5 [Source:TAIR;Acc:AT1G60260]	Glyco_hydro_1
AT1G12880	856.532	137.689	2.62917	1.66497e-152	4.0749e-150	NUDT12	1	1268	NUDT12 [Source:UniProtKB/TrEMBL;Acc:A0A178WEE5]	NUDIX
AT5G27950	1308.18	313.763	2.05547	2.87027e-152	6.95591e-150	KIN14U	5	4200	Kinesin-like protein KIN-14U [Source:UniProtKB/Swiss-Prot;Acc:Q8W0Y9]	Kinesin
AT4G38950	2130.58	405.907	2.38554	2.66046e-147	5.87177e-145	KIN7F	4	3863	Kinesin-like protein KIN-7F [Source:UniProtKB/Swiss-Prot;Acc:F4JUI9]	Kinesin
AT5G54062	668.342	87.5764	2.92711	4.76547e-143	1.0155e-140	-	5	845	unknown protein; FUNCTIONS IN: molecular_function unknown; INVOLVED IN: biological_process unknown; LOCATED IN: endomembrane system; CONTAINS InterPro DOMAIN/s: Protein of unknown function DUF1278 (InterPro:IPR010701); BEST Arabidopsis thaliana prot /.../tch is: Protein of unknown function (DUF1278) (TAIR:AT5G53742.1); Ha. [Source:TAIR;Acc:AT5G54062]	-
AT1G31600	998.159	165.558	2.58294	2.76308e-142	5.78818e-140	-	1	2332	-	-
AT5G52640	679.498	103.562	2.71834	4.81963e-141	9.76528e-139	HSP90-1	5	2103	Heat shock protein 90-1 [Source:UniProtKB/Swiss-Prot;Acc:P27323]	HATPase_c
AT1G10570	965.721	160.298	2.58638	5.04843e-138	9.90415e-136	ULP1C	1	2498	Ubiquitin-like-specific protease 1C [Source:UniProtKB/Swiss-Prot;Acc:Q8RWN0]	Peptidase_C48
AT1G69750	1752.05	391.151	2.16996	3.60501e-137	6.90793e-135	COX19-2	1	2929	At1g66590 [Source:UniProtKB/TrEMBL;Acc:Q9C9L6]	-
AT4G35165	738.852	18.252	5.33093	1.56537e-134	2.8244e-132	-	4	761	Egg cell-secreted-like protein (DUF1278) [Source:UniProtKB/TrEMBL;Acc:Q5BPK0]	-
AT5G42400	1069.86	157.719	2.75446	1.08557e-132	1.90314e-130	ATXR7	5	5372	SET domain protein 25 [Source:TAIR;Acc:AT5G42400]	SET
AT4G03205	1020.13	86.5492	3.58063	5.94488e-132	1.00652e-129	hemf2	4	1858	Coproporphyrinogen III oxidase [Source:TAIR;Acc:AT4G03205]	-
AT4G15440	2522.29	886.766	1.50784	3.02654e-131	5.05493e-129	CYP74B2	4	1870	Probable inactive linolenate hydroperoxide lyase [Source:UniProtKB/Swiss-Prot;Acc:B3LF83]	p450
AT3G26100	1263.57	321.043	1.97804	7.53076e-131	1.23696e-128	-	3	3112	Regulator of chromosome condensation (RCC1) family protein [Source:UniProtKB/TrEMBL;Acc:Q9LU80]	-
AT3G11990	673.998	15.7907	5.36224	7.55615e-131	1.23696e-128	-	3	653	ECA1 gametogenesis family protein (DUF784) [Source:UniProtKB/TrEMBL;Acc:Q9LHM2]	-
AT2G39851	632.128	22.7215	4.86216	2.67981e-130	4.35803e-128	-	2	579	Proteinase inhibitor, propeptide [Source:UniProtKB/TrEMBL;Acc:B3H4B7]	-
AT4G33260	1636.69	148.203	3.44947	8.13753e-130	1.30618e-127	CDC20-2	4	1940	Cell division cycle 20.2, cofactor of APC complex [Source:UniProtKB/Swiss-Prot;Acc:Q9S7I8]	WD40
AT4G32060	3394.75	753.529	2.16751	1.73103e-128	2.70818e-126	MICU	4	1977	Calcium uptake protein, mitochondrial [Source:UniProtKB/Swiss-Prot;Acc:Q9SZ45]	efhand
AT2G24693	581.354	42.4164	3.79231	3.55069e-127	5.48559e-125	-	2	443	Defensin-like protein 87 [Source:UniProtKB/Swiss-Prot;Acc:Q3E7S1]	-
AT2G39580	1974.82	202.969	3.27658	4.78663e-127	7.34912e-125	-	2	5352	CONTAINS InterPro DOMAIN/s: Putative zinc-finger domain (InterPro:IPR019607); Ha. [Source:TAIR;Acc:AT2G39580]	-
AT4G21326	783.532	80.6113	3.2803	1.04029e-126	1.57761e-124	ATSBT3.12	4	3185	subtilase 3.12 [Source:TAIR;Acc:AT4G21326]	Peptidase_S8
AT1G65370	7587.73	458.174	4.04676	1.2569e-126	1.88299e-124	-	1	1392	At1g65370/T8F5_15 [Source:UniProtKB/TrEMBL;Acc:Q940M1]	MATH
AT1G27520	1523.48	196.217	2.94569	2.1349e-125	3.10427e-123	MNS5	1	2309	Alpha-mannosidase I MNS5 [Source:UniProtKB/Swiss-Prot;Acc:Q9SXC9]	-
AT2G21465	547.73	29.1798	4.22524	2.76474e-125	3.99659e-123	-	2	420	Defensin-like protein 291 [Source:UniProtKB/Swiss-Prot;Acc:Q2V472]	-
AT2G22980	785.454	91.3451	3.08364	2.89131e-125	4.15525e-123	SCPL13	2	2432	Serine carboxypeptidase-like 13 [Source:UniProtKB/TrEMBL;Acc:A8MQS0]	Peptidase_S10
AT4G02430	1013.76	51.2361	4.29381	4.39004e-125	6.27268e-123	SR34b	4	2246	RNA-binding (RRM/RBD/RNP motifs) family protein [Source:TAIR;Acc:AT4G02430]	RRM_1
AT1G19485	916.813	114.553	2.99237	8.53169e-125	1.21204e-122	-	1	2735	Transducin/WD40 repeat-like superfamily protein [Source:UniProtKB/TrEMBL;Acc:F4HP69]	-
AT2G14378	594.426	44.7896	3.74779	1.40429e-124	1.97231e-122	-	2	501	Protein of unknown function (DUF1278) [Source:TAIR;Acc:AT2G14378]	-
AT2G27315	555.605	22.1419	4.60692	1.31955e-123	1.81211e-121	-	2	538	Protein of unknown function (DUF1278) [Source:TAIR;Acc:AT2G27315]	-
AT3G54500	6263.41	1394.05	2.16586	3.05436e-120	3.99475e-118	-	3	2926	BEST Arabidopsis thaliana protein match is: dentin sialophosphoprotein-related (TAIR:AT5G64170.1); Ha. [Source:TAIR;Acc:AT3G54500]	-
AT2G01100	2051.75	372.57	2.45614	3.63723e-120	4.70726e-118	-	2	1631	AT2G01100 protein [Source:UniProtKB/TrEMBL;Acc:Q9SJV6]	-
AT1G30820	6615.76	3281.41	1.01155	4.04609e-119	5.18214e-117	-	1	2509	CTP synthase [Source:UniProtKB/TrEMBL;Acc:F4I6G9]	CTP_synth_N
AT1G58060	985.255	215.224	2.1864	4.79391e-119	6.10828e-117	-	1	4691	DExH-box ATP-dependent RNA helicase DExH7, chloroplastic [Source:UniProtKB/Swiss-Prot;Acc:F4I9Q5]	DUF1605
AT1G65070	818.886	137.478	2.55975	5.13917e-118	6.44848e-116	-	1	3316	DNA mismatch repair protein MutS, type 2 [Source:UniProtKB/TrEMBL;Acc:Q9SS53]	-
AT4G11840	519.455	45.0245	3.50947	2.8794e-117	3.55879e-115	PLDGAMMA3	4	3223	Phospholipase D gamma 3 [Source:UniProtKB/Swiss-Prot;Acc:Q9T052]	C2
AT5G24670	2276.03	202.14	3.48263	3.4265e-117	4.21392e-115	-	5	2860	Cytidine/deoxycytidylate deaminase family protein [Source:UniProtKB/TrEMBL;Acc:F4KH85]	-
AT3G08840	858.561	226.277	1.92615	1.09938e-116	1.33869e-114	-	3	4600	D-alanine-D-alanine ligase family [Source:UniProtKB/TrEMBL;Acc:A0A1I9LPE3]	-
AT3G57170	847.144	148.863	2.49609	1.2416e-116	1.50447e-114	-	3	2685	N-acetylglucosaminyl transferase component family protein / Gpi1 family protein [Source:UniProtKB/TrEMBL;Acc:F4J262]	-
AT5G58200	1272.6	296.887	2.09426	1.80017e-116	2.14968e-114	-	5	1281	Calcineurin-like metallo-phosphoesterase superfamily protein [Source:UniProtKB/TrEMBL;Acc:F4KDK1]	Metallophos
AT2G19800	2158.73	754.941	1.51675	2.14264e-115	2.51013e-113	MIOX2	2	1620	At2g19800 [Source:UniProtKB/TrEMBL;Acc:B4F7Q2]	-
AT1G36060	616.176	13.1655	5.57718	2.47776e-115	2.88904e-113	ERF055	1	1841	Ethylene-responsive transcription factor ERF055 [Source:UniProtKB/Swiss-Prot;Acc:Q9SKW5]	AP2
AT2G24650	826.7	93.9207	3.13271	8.118e-115	9.33344e-113	REM13	2	3724	B3 domain-containing protein REM13 [Source:UniProtKB/Swiss-Prot;Acc:P0CAP5]	B3
novel.61	466.736	28.3939	3.99834	3.02335e-114	3.41252e-112	-	2	1900	- && Q9SJE1.3 RecName: Full=Magnesium-chelatase subunit ChlD, chloroplastic; Short=Mg-chelatase subunit D; AltName: Full=Mg-protoporphyrin IX chelatase subunit ChlD; AltName: Full=Protein ALBINA 1; AltName: Full=Protein PIGMENT DEFECTIVE EMBRYO 166; Flags: Precursor && -	-
AT5G45910	566.102	14.1082	5.35127	4.72469e-114	5.30862e-112	-	5	1277	GDSL esterase/lipase At5g45910 [Source:UniProtKB/Swiss-Prot;Acc:Q9FJ45]	Lipase_GDSL
AT1G09140	2331.62	607.224	1.93769	9.34595e-113	1.02677e-110	SR30	1	2256	Serine/arginine-rich splicing factor SR30 [Source:UniProtKB/Swiss-Prot;Acc:Q9XFR5]	RRM_1
AT1G31450	524.804	17.1299	4.94028	1.97516e-112	2.16036e-110	-	1	1384	Aspartyl protease family protein [Source:UniProtKB/TrEMBL;Acc:Q9C864]	-
AT1G15380	650.181	125.54	2.38682	3.9949e-112	4.35022e-110	-	1	1193	GLYI4 [Source:UniProtKB/TrEMBL;Acc:A0A178W6B2]	Glyoxalase
AT3G18530	576.412	59.0128	3.26638	1.13935e-111	1.21395e-109	-	3	1817	ARM repeat superfamily protein [Source:UniProtKB/TrEMBL;Acc:F4J8S4]	-
AT4G21910	14568.3	3578.68	2.02474	7.78802e-111	8.192e-109	-	4	4044	MATE efflux family protein [Source:TAIR;Acc:AT4G21910]	MatE
AT3G59320	442.049	30.8145	3.81257	1.42528e-110	1.49286e-108	-	3	1404	Anthocyanin-related membrane protein 2 [Source:UniProtKB/TrEMBL;Acc:Q948Q8]	-
AT2G38400	1023.3	266.37	1.94725	3.42927e-110	3.56169e-108	AGT3	2	2047	Alanine:glyoxylate aminotransferase 3 [Source:UniProtKB/TrEMBL;Acc:F4ISY3]	Aminotran_3
AT5G47500	5528.67	773.969	2.83432	1.28295e-108	1.3137e-106	PME68	5	1454	Probable pectinesterase 68 [Source:UniProtKB/Swiss-Prot;Acc:Q8LPF3]	-
AT3G57230	704.21	58.0002	3.59992	6.66244e-106	6.53527e-104	AGL16	3	2758	Agamous-like MADS-box protein AGL16 [Source:UniProtKB/Swiss-Prot;Acc:A2RVQ5]	SRF-TF
AT2G35615	733.227	37.8248	4.29739	8.30064e-106	8.07809e-104	-	2	1443	Probable aspartic protease At2g35615 [Source:UniProtKB/Swiss-Prot;Acc:Q3EBM5]	-
AT3G47675	444.43	26.0767	4.04454	2.33828e-104	2.2403e-102	-	3	639	Ternary complex factor MIP1 leucine-zipper protein [Source:UniProtKB/TrEMBL;Acc:Q8L5Z2]	-
AT5G20250	5791.96	1184.04	2.2888	2.85696e-104	2.72669e-102	DIN10	5	3120	Raffinose synthase family protein [Source:UniProtKB/TrEMBL;Acc:F4K470]	-
AT5G03830	482.386	26.7352	4.13239	3.07285e-104	2.91026e-102	-	5	1500	CDK inhibitor P21 binding protein [Source:UniProtKB/TrEMBL;Acc:F4KI15]	-
AT2G31280	1139.83	202.391	2.4832	5.40051e-104	5.07587e-102	CPUORF7	2	3489	conserved peptide upstream open reading frame 7 [Source:TAIR;Acc:AT2G31280]	-
AT4G22050	1822.2	432.967	2.0755	1.32547e-103	1.23639e-101	-	4	1253	Eukaryotic aspartyl protease family protein [Source:UniProtKB/TrEMBL;Acc:F4JKD9]	Asp
AT5G27860	1876.47	383.883	2.29595	2.04836e-103	1.89638e-101	-	5	942	unknown protein; FUNCTIONS IN: molecular_function unknown; INVOLVED IN: biological_process unknown; LOCATED IN: chloroplast; EXPRESSED IN: pollen tube; Ha. [Source:TAIR;Acc:AT5G27860]	-
AT1G61970	455.33	67.2149	2.76887	6.98656e-103	6.34929e-101	-	1	3098	At1g61970 [Source:UniProtKB/TrEMBL;Acc:O80702]	-
AT3G08065	396.76	36.3734	3.43577	3.47163e-102	3.10925e-100	-	3	591	-	-
AT5G02940	2374.88	760.376	1.63955	1.86794e-101	1.64905e-99	-	5	2989	Protein of unknown function (DUF1012) [Source:TAIR;Acc:AT5G02940]	-
AT3G49140	1384.8	310.353	2.1511	3.96985e-101	3.4922e-99	-	3	2010	Uncharacterized protein At3g49140 [Source:UniProtKB/Swiss-Prot;Acc:Q0WMN5]	-
AT5G64070	2263.87	590.846	1.93335	1.04386e-100	9.08562e-99	PI4KB1	5	4744	Phosphatidylinositol 4-kinase beta 1 [Source:UniProtKB/Swiss-Prot;Acc:Q9FMJ0]	PI3_PI4_kinase
AT2G25482	478.242	13.4775	5.17656	2.71068e-100	2.33468e-98	-	2	556	Protein of unknown function (DUF784) [Source:TAIR;Acc:AT2G25482]	-
AT3G61420	642.465	110.374	2.53391	3.00449e-100	2.57875e-98	TFB1-3	3	2682	General transcription and DNA repair factor IIH subunit TFB1-3 [Source:UniProtKB/Swiss-Prot;Acc:Q9M322]	-
AT5G09370	556.371	113.543	2.29691	4.15127e-100	3.5263e-98	-	5	1110	Bifunctional inhibitor/lipid-transfer protein/seed storage 2S albumin superfamily protein [Source:UniProtKB/TrEMBL;Acc:Q9FY78]	-
AT2G02570	1504.54	594.565	1.34166	1.13558e-97	9.38806e-96	-	2	1502	Nucleic acid binding/RNA binding protein [Source:UniProtKB/TrEMBL;Acc:Q84K41]	-
AT1G02300	428.09	25.7678	4.06963	2.28602e-97	1.88361e-95	CATHB1	1	1464	Cathepsin B-like protease 1 [Source:UniProtKB/Swiss-Prot;Acc:F4HVZ1]	Peptidase_C1
AT3G28830	1170.28	160.703	2.85547	2.56252e-96	2.07682e-94	-	3	2107	Mucin-like protein, putative (DUF1216) [Source:UniProtKB/TrEMBL;Acc:F4J0F0]	-
AT1G55310	2264.4	615.83	1.87519	3.22841e-96	2.59945e-94	SR33	1	2635	SC35-like splicing factor 33 [Source:TAIR;Acc:AT1G55310]	RRM_1
AT3G56960	397.204	43.6272	3.18181	4.89518e-96	3.91736e-94	PIP5K4	3	3875	Phosphatidylinositol 4-phosphate 5-kinase 4 [Source:UniProtKB/Swiss-Prot;Acc:Q9M1K2]	PIP5K
AT5G51290	631.856	139.503	2.18088	5.16306e-95	4.09057e-93	CERK	5	2512	Ceramide kinase [Source:UniProtKB/Swiss-Prot;Acc:Q6USK2]	-
AT2G14255	922.912	153.455	2.58773	1.02491e-93	8.01732e-92	PAT23	2	1986	Probable protein S-acyltransferase 23 [Source:UniProtKB/Swiss-Prot;Acc:Q3EC11]	-
AT4G32440	899.77	269.274	1.74077	6.57114e-93	5.04447e-91	-	4	2663	Plant Tudor-like RNA-binding protein [Source:UniProtKB/TrEMBL;Acc:Q0WP65]	Agenet
AT3G01770	2407.65	566.578	2.08238	2.69135e-92	2.04072e-90	GTE11	3	2506	Transcription factor GTE11 [Source:UniProtKB/Swiss-Prot;Acc:Q93ZB7]	Bromodomain
AT4G24450	418.436	27.5007	3.93169	4.45351e-92	3.32587e-90	GWD2	4	4517	Alpha-glucan water dikinase 2 [Source:UniProtKB/Swiss-Prot;Acc:Q9STV0]	-
AT3G01690	3491.07	1499.99	1.2179	1.54625e-91	1.14436e-89	-	3	1861	Alpha/beta-Hydrolases superfamily protein [Source:UniProtKB/TrEMBL;Acc:Q9S7U7]	-
AT3G47680	1043.46	67.58	3.92985	2.9106e-91	2.13493e-89	-	3	1646	At3g47680 [Source:UniProtKB/TrEMBL;Acc:Q9STU5]	-
AT5G58412	572.578	99.9372	2.53019	7.46994e-91	5.463e-89	-	5	590	Putative membrane lipoprotein [Source:TAIR;Acc:AT5G58412]	-
AT3G54910	500.196	42.5279	3.51219	2.134e-90	1.54693e-88	-	3	2554	At3g54910 [Source:UniProtKB/TrEMBL;Acc:Q501B7]	LRR_2
AT5G58350	554.562	86.2655	2.66957	3.51743e-90	2.53491e-88	WNK4	5	2552	Probable serine/threonine-protein kinase WNK4 [Source:UniProtKB/Swiss-Prot;Acc:Q9LVL5]	Pkinase
AT2G15880	380.093	19.0754	4.32056	4.93632e-90	3.53684e-88	PEX3	2	2709	Pollen-specific leucine-rich repeat extensin-like protein 3 [Source:UniProtKB/Swiss-Prot;Acc:Q9XIL9]	-
AT5G27920	1216.97	442.188	1.46486	1.30867e-88	9.26907e-87	-	5	2693	At5g27920 [Source:UniProtKB/TrEMBL;Acc:Q8GZ31]	-
AT5G37370	1768.6	669.747	1.39766	1.95058e-88	1.37369e-86	SRL1	5	2562	Pre-mRNA splicing factor SR-like 1 [Source:UniProtKB/Swiss-Prot;Acc:Q8RWB1]	-
AT3G48231	366.04	13.6813	4.72475	2.00685e-88	1.4093e-86	LCR48	3	439	Defensin-like protein 51 [Source:UniProtKB/Swiss-Prot;Acc:P82763]	-
AT2G42920	378.667	50.0192	2.90053	2.31412e-88	1.62047e-86	PCMP-E75	2	4069	Pentatricopeptide repeat-containing protein At2g42920, chloroplastic [Source:UniProtKB/Swiss-Prot;Acc:Q9SJG6]	-
AT1G05890	1707.77	655.73	1.3781	2.45885e-86	1.70253e-84	ARI5	1	2669	RBR-type E3 ubiquitin transferase [Source:UniProtKB/TrEMBL;Acc:F4IAE4]	IBR
AT4G12400	443.253	50.8934	3.1139	2.52719e-86	1.74496e-84	HOP3	4	2723	Hsp70-Hsp90 organizing protein 3 [Source:UniProtKB/Swiss-Prot;Acc:Q9STH1]	TPR_1
AT5G63930	486.546	107.412	2.17475	2.56306e-86	1.7648e-84	-	5	4857	Non-specific serine/threonine protein kinase [Source:UniProtKB/TrEMBL;Acc:A0A178UJL1]	Pkinase
AT5G52965	454.267	25.9441	4.07081	3.00897e-86	2.06035e-84	-	5	363	Egg cell-secreted-like protein (DUF1278) [Source:UniProtKB/TrEMBL;Acc:Q3E709]	-
AT5G35170	1919.94	450.853	2.08657	7.94443e-86	5.38023e-84	-	5	2442	Adenylate kinase 5, chloroplastic [Source:UniProtKB/Swiss-Prot;Acc:Q8VYL1]	ADK
AT5G60000	332.219	17.9953	4.20379	1.33554e-85	8.97098e-84	-	5	487	Transmembrane protein [Source:UniProtKB/TrEMBL;Acc:Q9FJD7]	-
AT1G19715	1029.38	158.731	2.69229	2.98391e-85	1.98277e-83	JAL3	1	2246	Jacalin-related lectin 3 [Source:UniProtKB/Swiss-Prot;Acc:F4HQX1]	-
AT2G11215	368.631	15.0699	4.57751	1.13495e-84	7.40232e-83	-	2	93	-	-
AT5G09880	2256.33	631.956	1.83249	2.41632e-84	1.56769e-82	-	5	1953	Splicing factor, CC1-like protein [Source:UniProtKB/TrEMBL;Acc:Q93Y25]	RRM_1
AT4G00760	356.416	37.8413	3.22048	4.94922e-84	3.17766e-82	APRR8	4	3365	pseudo-response regulator 8 [Source:TAIR;Acc:AT4G00760]	-
AT1G01305	374.962	14.1039	4.78752	5.46995e-84	3.50289e-82	-	1	617	Putative uncharacterized protein [Source:UniProtKB/TrEMBL;Acc:Q1G401]	-
novel.107	721.863	132.372	2.46361	8.42947e-84	5.38419e-82	-	3	975	- && Q9SSB5.1 RecName: Full=26S protease regulatory subunit 7 homolog A; AltName: Full=26S proteasome AAA-ATPase subunit RPT1a; AltName: Full=26S proteasome subunit 7 homolog A; AltName: Full=Regulatory particle triple-A ATPase subunit 1a && -	-
AT3G59330	337.01	17.8913	4.24712	2.43901e-83	1.54194e-81	-	3	1057	Solute carrier family 35 protein (DUF914) [Source:UniProtKB/TrEMBL;Acc:A0A1I9LQ57]	-
AT4G13263	433.295	9.42466	5.48929	2.87482e-83	1.81282e-81	-	4	582	ECA1 gametogenesis family protein (DUF784) [Source:UniProtKB/TrEMBL;Acc:Q3E6Z0]	-
AT5G04047	378.367	14.1186	4.73983	3.10132e-83	1.95067e-81	-	5	581	Plant self-incompatibility protein S1 family [Source:UniProtKB/TrEMBL;Acc:B3H5F7]	Self-incomp_S1
AT5G26622	668.742	166.39	2.01879	4.18797e-83	2.62747e-81	-	5	1497	Beta-galactosidase related protein [Source:UniProtKB/TrEMBL;Acc:Q2V346]	-
AT2G17000	554.126	116.914	2.23951	4.88479e-83	3.05689e-81	MSL7	2	2958	Mechanosensitive ion channel protein 7 [Source:UniProtKB/Swiss-Prot;Acc:F4IME1]	-
AT3G59780	1265.83	438.923	1.52263	1.02337e-82	6.3242e-81	-	3	2734	Rhodanese/Cell cycle control phosphatase superfamily protein [Source:UniProtKB/TrEMBL;Acc:F4J9G2]	-
AT4G27370	510.395	41.5631	3.60171	3.06172e-82	1.87798e-80	VIIIB	4	3882	P-loop containing nucleoside triphosphate hydrolases superfamily protein [Source:TAIR;Acc:AT4G27370]	Myosin_head
AT5G61740	610.018	118.761	2.35312	3.34842e-82	2.04875e-80	ABCA10	5	2975	ABC transporter A family member 10 [Source:UniProtKB/Swiss-Prot;Acc:Q9FLT4]	ABC_tran
AT1G48430	1166.21	398.559	1.55489	5.21516e-82	3.17521e-80	-	1	2316	Dihydroxyacetone kinase [Source:UniProtKB/TrEMBL;Acc:F4HYF4]	-
AT3G06500	1210.6	181.871	2.72267	6.16694e-82	3.74547e-80	INVC	3	2717	Alkaline/neutral invertase C, mitochondrial [Source:UniProtKB/Swiss-Prot;Acc:B9DFA8]	-
AT3G01185	495.158	8.42336	5.884	8.36577e-82	5.06847e-80	-	3	830	Prolamin-like protein (DUF784) [Source:UniProtKB/TrEMBL;Acc:Q3EBD9]	-
AT3G47360	410.472	75.3205	2.44997	9.35503e-82	5.65396e-80	HSD3	3	1296	11-beta-hydroxysteroid dehydrogenase-like 3 [Source:UniProtKB/Swiss-Prot;Acc:Q9STY7]	adh_short
AT4G12460	1192.31	297.303	1.99734	2.45675e-81	1.46334e-79	ORP2B	4	3666	OSBP(oxysterol binding protein)-related protein 2B [Source:TAIR;Acc:AT4G12460]	-
AT1G64430	1146.03	236.587	2.27314	2.57548e-81	1.5267e-79	-	1	2458	Pentatricopeptide repeat (PPR) superfamily protein [Source:UniProtKB/TrEMBL;Acc:Q8VYZ8]	-
AT5G25630	1277.28	412.643	1.62516	2.78564e-81	1.64733e-79	-	5	2519	Tetratricopeptide repeat (TPR)-like superfamily protein [Source:UniProtKB/TrEMBL;Acc:F4JY71]	-
AT4G02120	1148.28	319.004	1.85414	1.02223e-80	5.95958e-79	-	4	2280	CTP synthase family protein [Source:TAIR;Acc:AT4G02120]	CTP_synth_N
AT1G59980	396.077	70.0969	2.49083	2.08886e-80	1.20924e-78	ATJ39	1	5214	Chaperone protein dnaJ 39 [Source:UniProtKB/Swiss-Prot;Acc:Q6XL73]	DnaJ
AT2G05210	727.803	181.059	1.99474	4.96768e-80	2.8425e-78	POT1A	2	2463	Protection of telomeres protein 1a [Source:UniProtKB/Swiss-Prot;Acc:Q56Y52]	-
AT2G33240	362.084	32.4343	3.47547	1.38994e-79	7.91659e-78	XI-D	2	6177	Myosin-10 [Source:UniProtKB/Swiss-Prot;Acc:F4IVR7]	Myosin_head
AT5G22970	321.34	30.7439	3.37978	1.11689e-78	6.27463e-77	-	5	591	unknown protein; BEST Arabidopsis thaliana protein match is: unknown protein (TAIR:AT5G60000.1); Ha. [Source:TAIR;Acc:AT5G22970]	-
AT1G20100	1358.9	510.084	1.41756	3.34205e-78	1.85645e-76	-	1	1484	DNA ligase-like protein [Source:UniProtKB/TrEMBL;Acc:Q9LNT6]	-
AT1G14455	327.421	17.0687	4.26038	5.561e-78	3.08211e-76	-	1	582	Putative uncharacterized protein [Source:UniProtKB/TrEMBL;Acc:Q1G3U9]	-
AT2G11225	4994.9	377.477	3.72357	6.84941e-78	3.78771e-76	-	2	963	-	-
AT5G40450	639.081	49.0505	3.693	7.92075e-78	4.37038e-76	-	5	9194	unknown protein; FUNCTIONS IN: molecular_function unknown; INVOLVED IN: biological_process unknown; LOCATED IN: chloroplast, plasma membrane; EXPRESSED IN: 24 plant structures; EXPRESSED DURING: 13 growth stages; Ha. [Source:TAIR;Acc:AT5G40450]	-
AT5G22794	313.516	16.053	4.25744	1.34251e-77	7.35819e-76	-	5	1162	FUNCTIONS IN: molecular_function unknown; INVOLVED IN: biological_process unknown; LOCATED IN: cellular_component unknown; BEST Arabidopsis thaliana protein match is: Tetratricopeptide repeat (TPR)-like superfamily protein (TAIR:AT1G04770.1); Has 13 /.../t hits to 132 proteins in 14 species: Archae - 0; Bacteria - 0; Metazoa - 0; Fungi - 0; Plants - 132; Viruses - 0; Other Eukaryotes - 0 (source:…	-
AT5G55060	868.793	234.187	1.88274	2.34115e-77	1.28033e-75	-	5	2873	Rab3 GTPase-activating protein catalytic subunit [Source:UniProtKB/TrEMBL;Acc:Q683D2]	-
AT1G47450	351.658	14.1011	4.72416	4.69972e-77	2.55324e-75	-	1	579	Protein of unknown function (DUF784) [Source:TAIR;Acc:AT1G47450]	-
AT3G52840	803.463	222.493	1.86133	2.83235e-76	1.52533e-74	BGAL2	3	2636	Beta-galactosidase [Source:UniProtKB/TrEMBL;Acc:A0A1I9LM56]	-
AT2G37840	821.335	147.936	2.46959	2.94989e-76	1.58518e-74	ATG1C	2	3580	Serine/threonine-protein kinase ATG1c [Source:UniProtKB/Swiss-Prot;Acc:F4IRW0]	Pkinase
AT3G62230	371.02	32.4707	3.54362	3.52007e-76	1.88747e-74	-	3	1616	F-box protein At3g62230 [Source:UniProtKB/Swiss-Prot;Acc:Q9M1Q1]	-
AT4G04740	317.592	24.8006	3.66296	3.53273e-76	1.89017e-74	CPK23	4	4316	Calcium-dependent protein kinase 23 [Source:UniProtKB/TrEMBL;Acc:F4JGW8]	Pkinase
AT4G36860	519.319	142.024	1.86746	4.11367e-76	2.19624e-74	-	4	2537	LIM domain-containing protein [Source:TAIR;Acc:AT4G36860]	LIM
AT1G05790	609.206	188.959	1.68341	8.62641e-76	4.56609e-74	-	1	2640	lipase class 3 family protein [Source:TAIR;Acc:AT1G05790]	Lipase_3
AT1G69100	320.576	18.6111	4.08125	9.54863e-76	5.04343e-74	-	1	1278	Eukaryotic aspartyl protease family protein [Source:UniProtKB/TrEMBL;Acc:Q9LQA9]	Asp
AT2G46180	566.052	115.865	2.27537	1.44913e-75	7.63776e-74	GC4	2	2540	Golgin candidate 4 [Source:UniProtKB/Swiss-Prot;Acc:Q8VYU6]	-
AT1G52970	405.273	9.8685	5.47897	1.93407e-75	1.0172e-73	DD11	1	602	Protein DOWN-REGULATED IN DIF1 11 [Source:UniProtKB/Swiss-Prot;Acc:Q9C924]	-
AT5G13590	1116.01	284.382	1.96445	1.99129e-75	1.04507e-73	-	5	5815	unknown protein; Ha. [Source:TAIR;Acc:AT5G13590]	-
AT2G45580	338.808	20.5235	3.98699	2.20969e-75	1.15479e-73	CYP76C3	2	2115	Cytochrome P450 76C3 [Source:UniProtKB/Swiss-Prot;Acc:O64638]	p450
AT2G21727	422.146	6.98382	5.89678	2.47396e-75	1.29017e-73	-	2	514	ECA1 gametogenesis family protein (DUF784) [Source:UniProtKB/TrEMBL;Acc:A8MQ83]	-
AT3G11000	3594.67	1083.2	1.72799	3.32068e-75	1.72808e-73	-	3	2485	DCD (Development and Cell Death) domain protein [Source:UniProtKB/TrEMBL;Acc:F4J517]	-
AT3G56160	1079.26	396.18	1.44267	3.82981e-75	1.98053e-73	BASS4	3	2154	Probable sodium/metabolite cotransporter BASS4, chloroplastic [Source:UniProtKB/Swiss-Prot;Acc:F4IZC4]	-
AT3G48710	1205.34	347.417	1.78972	1.25484e-74	6.44873e-73	-	3	2111	At3g48710 [Source:UniProtKB/TrEMBL;Acc:Q9SMM8]	-
AT4G31210	1057.31	297.162	1.82272	3.66525e-74	1.86423e-72	-	4	4450	DNA topoisomerase, type IA, core [Source:UniProtKB/TrEMBL;Acc:F4JRX3]	Topoisom_bac
AT1G26440	448.719	63.8112	2.83631	7.6839e-74	3.88646e-72	UPS5	1	1919	Ureide permease 5 [Source:UniProtKB/Swiss-Prot;Acc:Q93Z75]	-
AT4G38120	850.177	171.606	2.29482	9.7252e-74	4.89608e-72	-	4	4015	ARM repeat superfamily protein [Source:TAIR;Acc:AT4G38120]	-
AT1G50970	594.374	43.7025	3.76068	1.35619e-73	6.81377e-72	-	1	2097	Vacuolar protein sorting-associated protein 53 B [Source:UniProtKB/Swiss-Prot;Acc:F4I7Y2]	-
AT1G51430	446.47	88.1809	2.33775	1.38798e-73	6.94523e-72	-	1	893	unknown protein; BEST Arabidopsis thaliana protein match is: unknown protein (TAIR:AT3G28370.1); Ha. [Source:TAIR;Acc:AT1G51430]	-
AT1G14970	516.495	89.2823	2.54019	1.43975e-73	7.18976e-72	OFUT4	1	2582	O-fucosyltransferase 4 [Source:UniProtKB/Swiss-Prot;Acc:F4HXW9]	-
AT3G22420	2267.18	1009.68	1.16538	1.75795e-73	8.76104e-72	WNK2	3	2347	With no lysine (K) kinase 2 [Source:UniProtKB/TrEMBL;Acc:A0A1I9LMD0]	Pkinase
AT3G19780	525.906	131.416	1.9978	7.96475e-73	3.91413e-71	-	3	3817	LOCATED IN: endomembrane system; CONTAINS InterPro DOMAIN/s: Protein of unknown function DUF179 (InterPro:IPR003774), Thioredoxin fold (InterPro:IPR012335), Thioredoxin-like fold (InterPro:IPR012336); BEST Arabidopsis thaliana protein match is: Prot /.../ unknown function (DUF179) (TAIR:AT1G33780.1); Ha. [Source:TAIR;Acc:AT3G19780]	-
AT2G34150	902.3	179.028	2.3203	1.12797e-72	5.53219e-71	SCAR1	2	3231	Protein SCAR1 [Source:UniProtKB/Swiss-Prot;Acc:Q6AWX6]	-
AT4G02460	601.835	94.6475	2.65468	1.34626e-72	6.5767e-71	PMS1	4	3289	DNA mismatch repair protein PMS1 [Source:UniProtKB/Swiss-Prot;Acc:Q941I6]	-
AT3G05380	1212.28	295.353	2.03056	1.85335e-72	9.03607e-71	ALY2	3	3884	DIRP ;Myb-like DNA-binding domain [Source:TAIR;Acc:AT3G05380]	DIRP
AT1G65950	379.519	39.4065	3.25241	1.88387e-72	9.16679e-71	-	1	1943	Protein kinase superfamily protein [Source:UniProtKB/TrEMBL;Acc:F4ID59]	ABC1
AT3G44740	314.043	29.5241	3.40531	2.45822e-72	1.19147e-70	-	3	1739	Class II aaRS and biotin synthetases superfamily protein [Source:UniProtKB/TrEMBL;Acc:F4J376]	-
AT4G30310	1006.87	393.06	1.35411	3.12398e-72	1.51118e-70	-	4	2244	FGGY family of carbohydrate kinase [Source:UniProtKB/TrEMBL;Acc:F4JQ90]	-
AT1G16680	1140.79	491.385	1.21517	5.15517e-72	2.48888e-70	-	1	2797	Chaperone DnaJ-domain superfamily protein [Source:UniProtKB/TrEMBL;Acc:F4I4I3]	DnaJ
AT1G55560	332.761	47.1146	2.8359	7.00303e-72	3.36132e-70	sks14	1	2036	Sks14 [Source:UniProtKB/TrEMBL;Acc:A0A178WAD5]	-
AT1G15740	1414.85	503.838	1.49486	1.23649e-71	5.90052e-70	-	1	2295	Leucine-rich repeat family protein [Source:UniProtKB/TrEMBL;Acc:Q8H1Q4]	-
AT5G67570	547.429	126.089	2.10964	2.56025e-71	1.21239e-69	DG1	5	2471	Pentatricopeptide repeat-containing protein At5g67570, chloroplastic [Source:UniProtKB/Swiss-Prot;Acc:Q9FJW6]	-
AT3G57300	3374.75	451.153	2.9005	3.17782e-71	1.49909e-69	INO80	3	5305	DNA helicase INO80-like protein [Source:UniProtKB/TrEMBL;Acc:F4J277]	SNF2_N
AT3G45940	998.918	87.7015	3.4964	3.61402e-71	1.69838e-69	XYL2	3	2607	Putative alpha-xylosidase 2 [Source:UniProtKB/Swiss-Prot;Acc:F4J6T7]	Glyco_hydro_31
AT2G31150	573.108	55.3489	3.34835	7.69394e-71	3.58843e-69	-	2	2049	ATP binding / ATPase [Source:UniProtKB/TrEMBL;Acc:F4IPY0]	-
AT5G53010	422.936	44.6036	3.23432	8.4624e-71	3.9394e-69	-	5	3764	Calcium-transporting ATPase [Source:UniProtKB/TrEMBL;Acc:F4KHQ2]	E1-E2_ATPase
AT5G44660	390.767	52.4992	2.88291	1.11796e-70	5.17505e-69	-	5	1705	At5g44650 [Source:UniProtKB/TrEMBL;Acc:Q9LU00]	-
AT3G14570	903.411	129.59	2.79671	1.59438e-70	7.31197e-69	CALS8	3	6416	Putative callose synthase 8 [Source:UniProtKB/Swiss-Prot;Acc:Q9LUD7]	DUF605
AT4G08470	375.711	53.569	2.78268	1.63297e-70	7.47508e-69	MAPKKK10	4	2484	Mitogen-activated protein kinase kinase kinase 3 [Source:UniProtKB/Swiss-Prot;Acc:Q9M0T3]	Pkinase
AT5G11800	724.247	238.701	1.60052	1.78593e-70	8.14508e-69	KEA6	5	2318	K(+) efflux antiporter 6 [Source:UniProtKB/Swiss-Prot;Acc:B5X0N6]	Na_H_Exchanger
AT4G26260	866.101	165.677	2.39961	3.01449e-70	1.37229e-68	MIOX4	4	1499	MIOX4 [Source:UniProtKB/TrEMBL;Acc:A0A178V1J3]	-
AT2G26030	474.693	93.1662	2.3514	4.16454e-70	1.88887e-68	-	2	1963	F-box/RNI-like/FBD-like domains-containing protein [Source:TAIR;Acc:AT2G26030]	LRR_2
AT3G12580	2167.89	298.078	2.8604	9.79231e-70	4.39303e-68	MED37C	3	2520	Probable mediator of RNA polymerase II transcription subunit 37c [Source:UniProtKB/Swiss-Prot;Acc:Q9LHA8]	HSP70
AT3G20210	4289.18	1726.96	1.31064	1.16579e-69	5.19227e-68	dVPE	3	1754	DELTAVPE [Source:UniProtKB/TrEMBL;Acc:A0A178VB13]	-
AT2G17525	313.046	26.919	3.5325	1.67512e-69	7.44734e-68	-	2	2290	Pentatricopeptide repeat-containing protein At2g17525, mitochondrial [Source:UniProtKB/Swiss-Prot;Acc:Q84VG6]	-
AT5G66610	315.263	49.5979	2.69625	2.241e-69	9.92745e-68	DAR7	5	2205	DA1-related protein 7 [Source:UniProtKB/TrEMBL;Acc:F4K0N7]	LIM
AT2G22620	416.001	99.5002	2.05685	3.26338e-69	1.43792e-67	-	2	2658	Rhamnogalacturonate lyase family protein [Source:UniProtKB/TrEMBL;Acc:Q9ZQ51]	-
AT3G10550	871.887	244.643	1.82962	4.04153e-69	1.77132e-67	MTM1	3	3012	MTM1 [Source:UniProtKB/TrEMBL;Acc:A0A178V871]	-
AT3G13080	1404.84	588.305	1.25152	6.0272e-69	2.62762e-67	ABCC3	3	5626	MRP3 [Source:UniProtKB/TrEMBL;Acc:A0A178VHA7]	ABC_tran
AT5G57565	398.576	81.4379	2.27536	1.06297e-68	4.60973e-67	-	5	1479	Protein kinase superfamily protein [Source:TAIR;Acc:AT5G57565]	Pkinase
AT5G66030	1449.6	158.307	3.18609	2.2264e-68	9.60462e-67	GRIP	5	3084	Protein GRIP [Source:UniProtKB/Swiss-Prot;Acc:Q8S2T0]	-
AT2G21655	392.954	6.06678	6.00458	2.42788e-68	1.04373e-66	-	2	562	At2g21655 [Source:UniProtKB/TrEMBL;Acc:Q8S8C9]	-
AT5G56750	970.822	298.123	1.7003	2.76243e-68	1.1855e-66	NDL1	5	2009	Protein NDL1 [Source:UniProtKB/Swiss-Prot;Acc:Q9FJT7]	Ndr
AT5G13840	1251.05	203.455	2.61494	3.02662e-68	1.29662e-66	FZR3	5	1927	Protein FIZZY-RELATED 3 [Source:UniProtKB/Swiss-Prot;Acc:Q8LPL5]	-
AT2G45380	1363.3	334.103	2.03628	7.27467e-68	3.07915e-66	-	2	2426	FUNCTIONS IN: molecular_function unknown; INVOLVED IN: biological_process unknown; LOCATED IN: cellular_component unknown; EXPRESSED IN: inflorescence meristem, flower, cultured cell; EXPRESSED DURING: petal differentiation and expansion stage; BEST /.../dopsis thaliana protein match is: Calcium-binding EF-hand family protein (TAIR:AT4G34070.1); Ha. [Source:TAIR;Acc:AT2G45380]	-
AT4G20800	248.786	20.7382	3.5918	9.97686e-68	4.20133e-66	-	4	1703	Berberine bridge enzyme-like 17 [Source:UniProtKB/Swiss-Prot;Acc:Q9SVG7]	FAD_binding_4
AT1G68990	1201.26	298.037	2.01115	1.05602e-67	4.4394e-66	MGP3	1	3695	DNA-directed RNA polymerase [Source:UniProtKB/TrEMBL;Acc:F4I0I3]	-
AT5G48570	413.504	66.1305	2.62334	4.45982e-67	1.83432e-65	FKBP65	5	2211	Peptidyl-prolyl cis-trans isomerase FKBP65 [Source:UniProtKB/Swiss-Prot;Acc:Q9FJL3]	FKBP_C
AT1G23935	543.176	129.844	2.05207	4.66288e-67	1.91465e-65	-	1	4314	CONTAINS InterPro DOMAIN/s: Apoptosis inhibitory 5 (InterPro:IPR008383); BEST Arabidopsis thaliana protein match is: unknown protein (TAIR:AT3G19515.2); Ha. [Source:TAIR;Acc:AT1G23935]	-
AT3G57470	2653.89	201	3.71686	4.86773e-67	1.99545e-65	-	3	3483	Insulin-degrading enzyme-like 2 [Source:UniProtKB/Swiss-Prot;Acc:F4J3D9]	-
AT3G24510	299.938	8.81949	5.10619	5.46176e-67	2.23525e-65	-	3	539	Defensin-like protein 259 [Source:UniProtKB/Swiss-Prot;Acc:Q9LV55]	-
AT1G05670	327.912	45.0784	2.84004	6.32833e-67	2.58135e-65	-	1	3419	Glycosyltransferase (Fragment) [Source:UniProtKB/TrEMBL;Acc:A0A068FPW3]	-
AT2G48100	1303.31	522.48	1.32095	6.88665e-67	2.79985e-65	-	2	2416	Exonuclease family protein [Source:UniProtKB/TrEMBL;Acc:Q9ZU79]	Exonuc_X-T
AT1G24520	275.616	22.9116	3.55748	9.13199e-67	3.70055e-65	BCP1	1	706	BCP1 [Source:UniProtKB/TrEMBL;Acc:A0A178W8R9]	-
AT2G20595	273.541	21.8623	3.64349	1.17533e-66	4.74721e-65	-	2	453	Expressed protein [Source:UniProtKB/TrEMBL;Acc:Q8S8D5]	-
AT3G59410	463.539	92.5955	2.32728	2.64621e-66	1.05673e-64	GCN2	3	5552	Protein kinase family protein [Source:UniProtKB/TrEMBL;Acc:F4J8A5]	Pkinase
AT4G12670	429.119	104.467	2.03032	3.39031e-66	1.3517e-64	-	4	2434	Homeodomain-like superfamily protein [Source:TAIR;Acc:AT4G12670]	-
AT4G24740	1527.14	478.533	1.67086	5.39138e-66	2.13573e-64	AFC2	4	2696	At4g24740 [Source:UniProtKB/TrEMBL;Acc:Q1EBU3]	Pkinase
AT5G43990	1017.41	358.564	1.4999	6.45202e-66	2.5518e-64	SUVR2	5	3033	SET-domain containing protein lysine methyltransferase family protein [Source:UniProtKB/TrEMBL;Acc:F4K7E3]	Pre-SET
AT1G35340	527.636	162.039	1.69861	7.10435e-66	2.80084e-64	-	1	1770	ATP-dependent protease La (LON) domain protein [Source:UniProtKB/TrEMBL;Acc:Q682J5]	-
AT4G13261	319.767	7.54152	5.31648	7.82487e-66	3.0702e-64	-	4	581	ECA1 gametogenesis family protein (DUF784) [Source:UniProtKB/TrEMBL;Acc:Q3E6U3]	-
AT2G47030	593.642	127.66	2.22601	9.6342e-66	3.77413e-64	PME4	2	2264	Pectinesterase 4 [Source:UniProtKB/Swiss-Prot;Acc:O80722]	-
AT5G55310	1221.11	229.361	2.4064	2.90497e-65	1.13441e-63	TOP1B	5	3197	DNA topoisomerase 1 beta [Source:UniProtKB/Swiss-Prot;Acc:Q9FJ79]	-
AT1G30490	1397.84	403.29	1.78792	3.38932e-65	1.32146e-63	ATHB-9	1	3079	Homeobox-leucine zipper protein ATHB-9 [Source:UniProtKB/Swiss-Prot;Acc:O04292]	START
AT2G29340	928.611	365.914	1.34668	3.43559e-65	1.33739e-63	-	2	1993	Tropinone reductase homolog At2g29340 [Source:UniProtKB/Swiss-Prot;Acc:F4IKM1]	-
AT2G46270	1543.94	556.031	1.47292	4.00236e-65	1.55557e-63	GBF3	2	1944	G-box-binding factor 3 [Source:UniProtKB/Swiss-Prot;Acc:P42776]	MFMR
AT3G53570	666.469	187.906	1.81984	4.69463e-65	1.82177e-63	AFC1	3	2123	AT3G53570 protein [Source:UniProtKB/TrEMBL;Acc:B9DH08]	Pkinase
AT2G37420	645.67	168.689	1.92504	8.74255e-65	3.38196e-63	KIN5B	2	3656	Kinesin-like protein KIN-5B [Source:UniProtKB/Swiss-Prot;Acc:Q0WQJ7]	Kinesin
AT4G13150	555.738	172.737	1.67455	9.9325e-65	3.83627e-63	-	4	1518	unknown protein; Ha. [Source:TAIR;Acc:AT4G13150]	-
AT2G24700	387.642	87.2296	2.14008	1.04899e-64	4.04523e-63	REM10	2	1956	B3 domain-containing protein REM10 [Source:UniProtKB/Swiss-Prot;Acc:P0DH85]	B3
AT3G62710	283.203	14.6999	4.25722	1.31206e-64	5.02833e-63	-	3	2282	Beta-D-glucan exohydrolase-like protein [Source:UniProtKB/TrEMBL;Acc:Q9LZJ4]	Glyco_hydro_3
AT3G03300	940.673	164.859	2.49898	1.80741e-64	6.89466e-63	DCL2	3	5338	Endoribonuclease Dicer homolog 2 [Source:UniProtKB/Swiss-Prot;Acc:Q3EBC8]	Ribonuclease_3
AT1G74180	346.781	37.2225	3.18176	1.94247e-64	7.39846e-63	AtRLP14	1	3546	Receptor-like protein 14 [Source:UniProtKB/Swiss-Prot;Acc:F4HTV4]	LRRNT_2
AT2G39280	1528.17	214.849	2.82518	2.02415e-64	7.67407e-63	-	2	2893	Ypt/Rab-GAP domain of gyp1p superfamily protein [Source:UniProtKB/TrEMBL;Acc:F4IUX9]	TBC
AT1G63300	568.157	114.246	2.29662	2.02815e-64	7.67748e-63	-	1	3529	Myosin heavy chain-related protein [Source:UniProtKB/TrEMBL;Acc:Q9C8T4]	-
AT4G36980	4625.54	393.374	3.55248	3.03553e-64	1.14558e-62	-	4	2310	FUNCTIONS IN: molecular_function unknown; INVOLVED IN: biological_process unknown; EXPRESSED IN: 23 plant structures; EXPRESSED DURING: 13 growth stages; CONTAINS InterPro DOMAIN/s: Splicing factor, suppressor of white apricot (InterPro:IPR019147). [Source:TAIR;Acc:AT4G36980]	-
AT2G38330	571.708	203.683	1.4888	3.83331e-64	1.44225e-62	DTX44	2	1753	Protein DETOXIFICATION [Source:UniProtKB/TrEMBL;Acc:A0A178VTF1]	MatE
AT1G02010	301.637	52.2865	2.53848	3.89624e-64	1.46369e-62	SEC1A	1	3073	secretory 1A [Source:TAIR;Acc:AT1G02010]	Sec1
AT3G29390	2107.02	182.458	3.5229	5.72392e-64	2.14054e-62	RIK	3	3371	Protein RIK [Source:UniProtKB/Swiss-Prot;Acc:Q9LIA4]	-
AT2G24280	2334.95	804.996	1.5358	6.65499e-64	2.48122e-62	-	2	3938	Alpha/beta-Hydrolases superfamily protein [Source:UniProtKB/TrEMBL;Acc:Q93Z34]	Peptidase_S28
novel.96	384.462	19.8792	4.22065	9.45289e-64	3.51907e-62	-	3	3721	- && C0LGR6.2 RecName: Full=Probable LRR receptor-like serine/threonine-protein kinase At4g29180; Flags: Precursor && -	-
AT4G33080	2262.53	747.905	1.59272	9.85849e-64	3.66454e-62	-	4	2323	AGC (cAMP-dependent, cGMP-dependent and protein kinase C) kinase family protein [Source:UniProtKB/TrEMBL;Acc:Q8GUH5]	Pkinase
AT3G63340	1243.42	250.933	2.30389	1.0448e-63	3.87783e-62	-	3	4204	Protein phosphatase 2C family protein [Source:TAIR;Acc:AT3G63340]	PP2C
AT3G55850	701.813	193.005	1.85449	1.37884e-63	5.10234e-62	LAF3	3	2867	Protein LONG AFTER FAR-RED 3 [Source:UniProtKB/Swiss-Prot;Acc:A0A1I9LN01]	-
AT3G20810	479.567	126.269	1.92709	1.52076e-63	5.6191e-62	JMJ30	3	2035	Lysine-specific demethylase JMJ30 [Source:UniProtKB/Swiss-Prot;Acc:Q8RWR1]	-
AT1G76820	236.416	21.8429	3.41458	5.36907e-63	1.96619e-61	-	1	3857	eukaryotic translation initiation factor 2 (eIF-2) family protein [Source:TAIR;Acc:AT1G76820]	GTP_EFTU
AT5G44750	2437.12	207.368	3.54718	5.954e-63	2.17717e-61	REV1	5	3842	DNA repair protein REV1 [Source:UniProtKB/Swiss-Prot;Acc:A3EWL3]	IMS
AT3G03828	269.166	29.8679	3.13231	7.03985e-63	2.56664e-61	-	3	431	Transmembrane protein [Source:UniProtKB/TrEMBL;Acc:B3H4H1]	-
AT3G61010	1445.22	113.95	3.65972	1.67065e-62	6.0464e-61	-	3	3104	Ferritin [Source:UniProtKB/TrEMBL;Acc:F4JD24]	Ferritin
AT3G59660	917.445	395.32	1.21475	2.57145e-62	9.27938e-61	BAGP1	3	2352	BAG-associated GRAM protein 1 [Source:UniProtKB/Swiss-Prot;Acc:Q8W4D4]	C2
AT1G01770	444.801	64.7471	2.77835	3.74663e-62	1.34808e-60	-	1	2377	Propionyl-CoA carboxylase [Source:UniProtKB/TrEMBL;Acc:Q8GZ85]	-
AT5G37170	259.293	20.7856	3.59471	5.39953e-62	1.92321e-60	-	5	1643	O-methyltransferase family protein [Source:UniProtKB/TrEMBL;Acc:F4K5W7]	-
AT3G28030	641.302	113.685	2.4785	5.53334e-62	1.96804e-60	UVH3	3	5030	5'-3' exonuclease family protein [Source:UniProtKB/TrEMBL;Acc:A0A1I9LM66]	XPG_I
AT1G56140	343.923	78.8805	2.115	6.0352e-62	2.14345e-60	-	1	3671	Probable LRR receptor-like serine/threonine-protein kinase At1g56140 [Source:UniProtKB/Swiss-Prot;Acc:C0LGH3]	Pkinase_Tyr
AT1G61680	349.575	61.4442	2.51608	9.01558e-62	3.18821e-60	TPS14	1	1883	S-(+)-linalool synthase, chloroplastic [Source:UniProtKB/Swiss-Prot;Acc:Q84UV0]	-
AT4G01593	268.125	12.5995	4.38128	1.04331e-61	3.67897e-60	-	4	1349	other RNA [Source:TAIR;Acc:AT4G01593]	-
AT5G23610	1391.98	580.508	1.25724	1.30025e-61	4.57197e-60	-	5	2373	BEST Arabidopsis thaliana protein match is: SWITCH1 (TAIR:AT5G51330.1); Ha. [Source:TAIR;Acc:AT5G23610]	-
AT2G22730	237.128	23.4356	3.33481	1.47808e-61	5.18987e-60	-	2	1990	Major facilitator superfamily protein [Source:TAIR;Acc:AT2G22730]	MFS_1
AT1G56385	288.786	12.6149	4.62012	1.81431e-61	6.34342e-60	-	1	553	Plant self-incompatibility protein S1 family [Source:UniProtKB/TrEMBL;Acc:B3H6X7]	Self-incomp_S1
AT1G65280	989.15	320.139	1.62218	2.14432e-61	7.46557e-60	-	1	2387	DNAJ heat shock N-terminal domain-containing protein [Source:UniProtKB/TrEMBL;Acc:Q0WVU7]	DnaJ
AT1G05950	753.311	221.174	1.76064	2.53383e-61	8.79686e-60	-	1	2415	unknown protein; Ha. [Source:TAIR;Acc:AT1G05950]	-
AT5G15700	539.996	160.983	1.73637	2.84606e-61	9.86701e-60	-	5	4300	DNA-directed RNA polymerase [Source:UniProtKB/TrEMBL;Acc:F4KB75]	-
AT4G07455	500.381	126.139	1.99318	3.66788e-61	1.26984e-59	-	4	341	Putative uncharacterized protein [Source:UniProtKB/TrEMBL;Acc:Q0WTS9]	-
AT3G54720	1596.19	546.861	1.54002	3.79941e-61	1.31353e-59	AMP1	3	2432	Probable glutamate carboxypeptidase AMP1 [Source:UniProtKB/Swiss-Prot;Acc:Q9M1S8]	TFR_dimer
AT2G41060	1057.66	399.617	1.3999	4.01303e-61	1.38352e-59	UBA2B	2	3313	UBP1-associated protein 2B [Source:UniProtKB/Swiss-Prot;Acc:O80678]	RRM_1
AT1G73350	547.59	172.831	1.66843	5.02065e-61	1.72608e-59	-	1	1602	unknown protein; FUNCTIONS IN: molecular_function unknown; INVOLVED IN: biological_process unknown; LOCATED IN: nucleus; EXPRESSED IN: 25 plant structures; EXPRESSED DURING: 15 growth stages; Ha. [Source:TAIR;Acc:AT1G73350]	-
AT5G01670	289.157	42.1534	2.77743	7.33229e-61	2.51035e-59	-	5	1480	NAD(P)-linked oxidoreductase superfamily protein [Source:UniProtKB/TrEMBL;Acc:F4K9G7]	Aldo_ket_red
AT1G48360	446.842	118.875	1.90681	1.48924e-60	5.07059e-59	FAN1	1	3446	Fanconi-associated nuclease 1 homolog [Source:UniProtKB/Swiss-Prot;Acc:Q5XVJ4]	-
AT5G24316	250.135	28.175	3.15611	3.51894e-60	1.18669e-58	-	5	509	Proline-rich family protein [Source:UniProtKB/TrEMBL;Acc:Q8L8V7]	-
AT1G18160	1258.95	457.782	1.45942	5.91217e-60	1.96958e-58	-	1	3815	Protein kinase superfamily protein [Source:UniProtKB/TrEMBL;Acc:F4IAN2]	Pkinase_Tyr
AT1G49180	302.776	46.7199	2.66819	7.09689e-60	2.3579e-58	-	1	1498	Serine/threonine-protein kinase ATG1t [Source:UniProtKB/Swiss-Prot;Acc:F4I1N8]	Pkinase
AT3G12980	518.543	151.626	1.77615	1.21293e-59	4.01372e-58	HAC5	3	5701	Histone acetyltransferase HAC5 [Source:UniProtKB/Swiss-Prot;Acc:Q9LE42]	zf-TAZ
AT4G02655	316.466	34.6315	3.23442	1.79447e-59	5.90647e-58	-	4	640	unknown protein; FUNCTIONS IN: molecular_function unknown; INVOLVED IN: biological_process unknown; LOCATED IN: endomembrane system; BEST Arabidopsis thaliana protein match is: unknown protein (TAIR:AT1G18486.1); Ha. [Source:TAIR;Acc:AT4G02655]	-
AT1G16540	328.297	43.036	2.90504	2.51585e-59	8.25888e-58	SIR3	1	2981	molybdenum cofactor sulfurase (LOS5) (ABA3) [Source:TAIR;Acc:AT1G16540]	MOSC_N
AT3G52030	588.782	190.557	1.62894	4.53769e-59	1.47589e-57	-	3	1485	F-box/WD-40 repeat-containing protein At3g52030 [Source:UniProtKB/Swiss-Prot;Acc:Q9SV01]	F-box
AT4G30690	754.072	194.308	1.96903	6.66598e-59	2.15959e-57	IF3-4	4	1132	Translation initiation factor IF3-4, chloroplastic [Source:UniProtKB/Swiss-Prot;Acc:Q94B52]	-
AT1G67310	1541.15	588.077	1.3856	7.15343e-59	2.31447e-57	CAMTA4	1	3051	Calmodulin-binding transcription activator 4 [Source:UniProtKB/Swiss-Prot;Acc:Q9FYG2]	CG-1
AT5G04180	245.193	14.2665	4.16789	8.89343e-59	2.87368e-57	ACA3	5	1140	Alpha carbonic anhydrase 3 [Source:UniProtKB/Swiss-Prot;Acc:Q9FYE3]	-
AT2G31800	673.389	178.515	1.91591	9.31938e-59	3.00739e-57	-	2	1983	At2g31800 [Source:UniProtKB/TrEMBL;Acc:Q1JPN7]	Pkinase_Tyr
AT4G16745	356.735	58.7186	2.58363	1.50622e-58	4.83537e-57	-	4	2427	Exostosin family protein [Source:UniProtKB/TrEMBL;Acc:F4JMK5]	-
AT2G30600	1545.35	376.982	2.03335	1.70203e-58	5.45687e-57	-	2	3328	BTB/POZ domain-containing protein [Source:UniProtKB/TrEMBL;Acc:F4INV5]	BTB
AT1G14640	265.89	13.2543	4.27163	1.84593e-58	5.90293e-57	-	1	2347	SWAP (Suppressor-of-White-APricot)/surp domain-containing protein [Source:UniProtKB/TrEMBL;Acc:F4HW92]	-
AT5G35930	692.802	211.643	1.70218	2.02528e-58	6.45593e-57	-	5	4746	AMP-dependent synthetase and ligase family protein [Source:TAIR;Acc:AT5G35930]	AMP-binding
AT4G12680	290.654	18.6479	3.88809	2.0267e-58	6.45593e-57	-	4	1910	Expressed protein [Source:UniProtKB/TrEMBL;Acc:Q45GJ7]	-
AT3G30720	249.988	25.604	3.27992	2.04464e-58	6.50469e-57	QQS	3	687	Protein QQS [Source:UniProtKB/Swiss-Prot;Acc:Q3E7K4]	-
AT5G05540	688.606	191.143	1.84407	3.03239e-58	9.63467e-57	SDN2	5	1804	Small RNA degrading nuclease 2 [Source:UniProtKB/Swiss-Prot;Acc:Q9FFG1]	Exonuc_X-T
AT5G12230	772.692	311.343	1.30944	3.94332e-58	1.25128e-56	MED19A	5	1334	Mediator of RNA polymerase II transcription subunit 19a [Source:UniProtKB/Swiss-Prot;Acc:Q9FMP0]	-
AT3G24010	634.7	220.349	1.53126	7.34217e-58	2.31494e-56	ING1	3	1020	PHD finger protein ING1 [Source:UniProtKB/Swiss-Prot;Acc:Q9LIQ6]	-
AT5G22620	531.182	161.134	1.71774	7.95625e-58	2.50217e-56	-	5	2289	Probable 2-carboxy-D-arabinitol-1-phosphatase [Source:UniProtKB/Swiss-Prot;Acc:Q9FNJ9]	-
AT5G39880	362.492	69.9978	2.35628	9.33161e-58	2.92355e-56	-	5	1458	Transmembrane protein [Source:UniProtKB/TrEMBL;Acc:Q9FLE6]	-
AT1G80260	1569.34	480.033	1.70356	9.5496e-58	2.98806e-56	emb1427	1	3834	Gamma-tubulin complex component [Source:UniProtKB/TrEMBL;Acc:Q0WPZ0]	-
AT5G58980	267.895	28.2859	3.22794	1.0368e-57	3.23595e-56	NCER3	5	2404	Neutral ceramidase 3 [Source:UniProtKB/Swiss-Prot;Acc:F4KHQ8]	Ceramidase_alk
AT1G79700	605.831	211.834	1.51257	1.2448e-57	3.87534e-56	-	1	1578	Integrase-type DNA-binding superfamily protein [Source:UniProtKB/TrEMBL;Acc:A8MQS2]	AP2
AT5G20380	645.525	225.903	1.50905	1.53771e-57	4.75728e-56	PHT4;5	5	2067	phosphate transporter 4;5 [Source:TAIR;Acc:AT5G20380]	MFS_1
AT3G02300	1725.04	500.578	1.79048	1.57351e-57	4.86196e-56	-	3	2156	Regulator of chromosome condensation (RCC1) family protein [Source:UniProtKB/TrEMBL;Acc:A0A1I9LR23]	-
AT5G64390	898.365	222.606	2.01033	3.64398e-57	1.11756e-55	HEN4	5	4433	RNA-binding KH domain-containing protein [Source:UniProtKB/TrEMBL;Acc:F4KDM9]	KH_1
AT1G67300	746.594	274.254	1.43771	4.07363e-57	1.24778e-55	-	1	2083	Major facilitator superfamily protein [Source:UniProtKB/TrEMBL;Acc:F4HRU5]	Sugar_tr
AT5G11400	272.033	46.15	2.56866	7.95508e-57	2.42468e-55	-	5	985	Protein kinase superfamily protein [Source:TAIR;Acc:AT5G11400]	Pkinase_Tyr
AT3G54740	693.943	249.611	1.47084	1.042e-56	3.16817e-55	-	3	2218	Uncharacterized protein T5N23_100 [Source:UniProtKB/TrEMBL;Acc:Q9M1S6]	-
AT4G36270	422.342	52.6087	2.98172	1.53145e-56	4.61094e-55	-	4	2163	ATP binding [Source:TAIR;Acc:AT4G36270]	-
AT4G26255	1124.39	244.252	2.21214	1.80765e-56	5.42931e-55	-	4	1222	other RNA [Source:TAIR;Acc:AT4G26255]	-
AT5G37260	2606.5	480.763	2.44317	2.01984e-56	6.05928e-55	RVE2	5	980	Protein REVEILLE 2 [Source:UniProtKB/Swiss-Prot;Acc:F4K5X6]	Myb_DNA-binding
AT5G17440	895.53	255.642	1.79846	3.08286e-56	9.21465e-55	-	5	1999	AT5g17440/K3M16_10 [Source:UniProtKB/TrEMBL;Acc:Q940U9]	-
AT1G73310	237.425	35.092	2.74582	4.80954e-56	1.4341e-54	SCPL4	1	1820	Serine carboxypeptidase-like 4 [Source:UniProtKB/Swiss-Prot;Acc:Q9CAU4]	Peptidase_S10
AT1G02960	599.313	86.801	2.77607	8.21769e-56	2.43857e-54	-	1	1924	Kinetochore protein [Source:UniProtKB/TrEMBL;Acc:Q8GWB5]	-
AT1G07350	1248.45	392.027	1.67762	8.35958e-56	2.47474e-54	SR45A	1	1983	Serine/arginine-rich splicing factor SR45a [Source:UniProtKB/Swiss-Prot;Acc:Q84TH4]	RRM_1
AT1G13040	291.177	48.5174	2.5689	8.56579e-56	2.53275e-54	-	1	2304	Pentatricopeptide repeat-containing protein At1g13040, mitochondrial [Source:UniProtKB/Swiss-Prot;Acc:Q9SAD9]	-
AT2G22830	289.256	64.5219	2.15032	1.16007e-55	3.41786e-54	SQE2	2	2204	Squalene epoxidase 2, mitochondrial [Source:UniProtKB/Swiss-Prot;Acc:O81000]	-
AT4G02005	380.56	93.7462	2.00788	1.21342e-55	3.57077e-54	-	4	2113	other RNA [Source:TAIR;Acc:AT4G02005]	-
AT1G11720	959.195	200.207	2.25137	1.36011e-55	3.99295e-54	ATSS3	1	3796	SS3 [Source:UniProtKB/TrEMBL;Acc:A0A178W4M9]	-
AT2G31510	1409.73	665.871	1.08228	1.44169e-55	4.22742e-54	ARI7	2	2981	Probable E3 ubiquitin-protein ligase ARI7 [Source:UniProtKB/Swiss-Prot;Acc:Q84RR0]	IBR
AT4G08480	418.662	102.751	2.01752	1.7867e-55	5.22051e-54	MEKK2	4	3207	Mitogen-activated protein kinase kinase kinase 9 [Source:UniProtKB/Swiss-Prot;Acc:O81472]	Pkinase
AT2G41700	1034.34	274.159	1.90838	1.94164e-55	5.66652e-54	ABCA1	2	6532	ABC transporter A family member 1 [Source:UniProtKB/Swiss-Prot;Acc:Q84M24]	ABC_tran
AT2G23980	1548.99	662.47	1.22211	2.23728e-55	6.52162e-54	ATCNGC6	2	3131	cyclic nucleotide-gated channel 6 [Source:TAIR;Acc:AT2G23980]	Ion_trans
AT1G50730	757.856	281.623	1.42796	4.29904e-55	1.24145e-53	-	1	3174	unknown protein; Ha. [Source:TAIR;Acc:AT1G50730]	-
AT2G35920	1185.34	377.719	1.64715	6.55187e-55	1.88399e-53	-	2	3653	RNA helicase family protein [Source:TAIR;Acc:AT2G35920]	HA2
AT1G78080	3064.47	1496.85	1.03592	6.5546e-55	1.88399e-53	RAP2-4	1	2136	Ethylene-responsive transcription factor RAP2-4 [Source:UniProtKB/Swiss-Prot;Acc:Q8H1E4]	AP2
AT2G21750	296.582	5.29895	5.84489	8.08694e-55	2.31635e-53	EC1.3	2	408	Egg cell-secreted protein 1.3 [Source:UniProtKB/Swiss-Prot;Acc:Q9SJ23]	-
AT4G31240	272.969	39.2579	2.7782	1.13102e-54	3.23209e-53	-	4	2224	Probable nucleoredoxin 3 [Source:UniProtKB/Swiss-Prot;Acc:Q8VZQ0]	-
AT1G57777	411.137	3.76345	6.73323	1.20425e-54	3.43741e-53	-	1	564	ECA1 gametogenesis family protein (DUF784) [Source:UniProtKB/TrEMBL;Acc:A7REC9]	-
AT4G09680	1150.49	210.935	2.44045	1.76894e-54	5.02027e-53	CTC1	4	4760	Conserved telomere maintenance component 1 [Source:UniProtKB/TrEMBL;Acc:F4JKR3]	-
AT5G65740	412.355	106.631	1.95656	1.78051e-54	5.04729e-53	-	5	1537	AT5G65740 protein [Source:UniProtKB/TrEMBL;Acc:B9DHA4]	-
AT1G10890	1729.81	169.636	3.34457	2.20346e-54	6.20356e-53	-	1	2245	unknown protein; FUNCTIONS IN: molecular_function unknown; INVOLVED IN: biological_process unknown; LOCATED IN: chloroplast; EXPRESSED IN: petal, flower, leaf; EXPRESSED DURING: LP.04 four leaves visible, 4 anthesis, petal differentiation and expans /.../age; BEST Arabidopsis thaliana protein match is: unknown protein (TAIR:AT5G13340.1); Ha. [Source:TAIR;Acc:AT1G10890]	-
AT5G04540	827.854	283.131	1.54427	2.22417e-54	6.25476e-53	MTM2	5	3150	Phosphatidylinositol-3-phosphatase myotubularin-2 [Source:UniProtKB/Swiss-Prot;Acc:F4JWB3]	-
AT1G02050	408.204	87.5769	2.20584	3.5185e-54	9.86098e-53	PKSA	1	1540	Type III polyketide synthase A [Source:UniProtKB/Swiss-Prot;Acc:O23674]	Chal_sti_synt_N
AT5G18590	1249.01	584.578	1.09511	3.62079e-54	1.01362e-52	-	5	2756	Galactose oxidase/kelch repeat superfamily protein [Source:UniProtKB/TrEMBL;Acc:Q0WWX4]	Kelch_1
AT2G36695	354.206	55.3632	2.67844	4.49052e-54	1.25425e-52	-	2	541	unknown protein; FUNCTIONS IN: molecular_function unknown; INVOLVED IN: biological_process unknown; LOCATED IN: endomembrane system; Ha. [Source:TAIR;Acc:AT2G36695]	-
AT4G08035	1436.93	92.6674	3.94673	4.76418e-54	1.32918e-52	-	4	1790	other RNA [Source:TAIR;Acc:AT4G08035]	-
AT3G14150	826.238	248.817	1.735	4.90002e-54	1.36554e-52	GLO3	3	1980	HAOX2 [Source:UniProtKB/TrEMBL;Acc:A0A178VKC7]	FMN_dh
AT5G44510	656.517	102.997	2.66346	4.95307e-54	1.37877e-52	TAO1	5	4053	Disease resistance protein TAO1 [Source:UniProtKB/Swiss-Prot;Acc:Q9FI14]	TIR
AT5G40570	255.009	49.2363	2.37111	6.83778e-54	1.89701e-52	-	5	813	Surfeit locus protein 2 (SURF2) [Source:UniProtKB/TrEMBL;Acc:A8MRG2]	-
AT2G21385	844.718	333.891	1.34394	6.8843e-54	1.90777e-52	-	2	1551	Expressed protein [Source:UniProtKB/TrEMBL;Acc:Q94AU3]	-
AT5G21930	1219.44	334.321	1.8631	7.9985e-54	2.21158e-52	PAA2	5	3359	Copper-transporting ATPase PAA2, chloroplastic [Source:UniProtKB/Swiss-Prot;Acc:B9DFX7]	E1-E2_ATPase
AT5G41260	963.03	360.216	1.42201	8.92488e-54	2.46496e-52	BSK8	5	2404	Serine/threonine-protein kinase BSK8 [Source:UniProtKB/Swiss-Prot;Acc:Q9FHD7]	Pkinase_Tyr
AT3G30247	287.162	6.78986	5.47116	1.08283e-53	2.98734e-52	-	3	551	ECA1 gametogenesis family protein (DUF784) [Source:UniProtKB/TrEMBL;Acc:Q9LRU1]	-
AT5G46840	1490.43	731.556	1.02336	1.25874e-53	3.46489e-52	-	5	1771	At5g46840 [Source:UniProtKB/TrEMBL;Acc:Q9LUK6]	RRM_1
AT5G44090	1114.19	371.158	1.58189	1.27904e-53	3.51296e-52	-	5	3014	Calcium-binding EF-hand family protein [Source:TAIR;Acc:AT5G44090]	-
AT1G55810	857.221	303.467	1.49831	2.35394e-53	6.43662e-52	UKL3	1	2517	uridine kinase-like 3 [Source:TAIR;Acc:AT1G55810]	-
AT4G27910	583.987	101.494	2.50893	2.57455e-53	7.02431e-52	ATX4	4	4237	Histone-lysine N-methyltransferase [Source:UniProtKB/TrEMBL;Acc:A0A178UVA2]	SET
AT3G56610	219.039	27.2978	3.01314	3.94507e-53	1.07399e-51	-	3	499	At3g56610 [Source:UniProtKB/TrEMBL;Acc:Q9LXX9]	-
AT5G21160	2590.41	860.27	1.58697	4.44487e-53	1.20872e-51	-	5	3257	LA RNA-binding protein [Source:UniProtKB/TrEMBL;Acc:F4K704]	-
AT1G06710	356.357	80.2668	2.14768	6.12893e-53	1.65575e-51	-	1	4600	Tetratricopeptide repeat (TPR)-like superfamily protein [Source:TAIR;Acc:AT1G06710]	-
AT3G24740	869.083	324.131	1.41635	7.93062e-53	2.14014e-51	-	3	2769	AT3g24740/K7P8_3 [Source:UniProtKB/TrEMBL;Acc:Q9LRY5]	-
AT5G56520	231.758	42.3749	2.46524	9.91808e-53	2.67064e-51	-	5	1295	At5g56520 [Source:UniProtKB/TrEMBL;Acc:Q8L9N8]	-
AT5G25270	1913.5	763.772	1.32125	1.20644e-52	3.24151e-51	-	5	2681	Ubiquitin-like superfamily protein [Source:TAIR;Acc:AT5G25270]	ubiquitin
AT5G56380	694.015	115.963	2.57057	2.14937e-52	5.76875e-51	-	5	2155	FBD-associated F-box protein At5g56380 [Source:UniProtKB/Swiss-Prot;Acc:Q9FM93]	-
AT4G15030	476.961	84.3255	2.48734	2.15614e-52	5.78065e-51	-	4	2164	Folate-sensitive fragile site protein [Source:UniProtKB/TrEMBL;Acc:F4JJC3]	-
AT2G42640	247.962	34.9304	2.81996	2.86925e-52	7.66756e-51	-	2	2942	Mitogen activated protein kinase kinase kinase-like protein [Source:UniProtKB/TrEMBL;Acc:F4IP61]	Pkinase_Tyr
AT5G48605	321.907	4.63826	6.15548	3.61091e-52	9.62872e-51	-	5	349	Defensin-like protein 220 [Source:UniProtKB/Swiss-Prot;Acc:Q2V304]	-
AT1G02530	660.796	137.603	2.25214	3.63535e-52	9.68344e-51	ABCB12	1	4221	PGP12 [Source:UniProtKB/TrEMBL;Acc:A0A178WBY9]	ABC_membrane
AT2G38780	380.567	100.233	1.91096	4.67284e-52	1.24069e-50	-	2	3689	unknown protein; FUNCTIONS IN: molecular_function unknown; INVOLVED IN: biological_process unknown; LOCATED IN: chloroplast; EXPRESSED IN: 21 plant structures; EXPRESSED DURING: 13 growth stages; Ha. [Source:TAIR;Acc:AT2G38780]	-
AT1G08300	269.815	55.6726	2.27439	5.42446e-52	1.43716e-50	NVL	1	2462	No vein-like protein [Source:UniProtKB/TrEMBL;Acc:F4HW09]	-
AT1G34320	1237.53	516.09	1.25923	6.15655e-52	1.62938e-50	-	1	2959	At1g34320 [Source:UniProtKB/TrEMBL;Acc:Q6NQ48]	-
AT5G19480	551.055	164.378	1.73583	6.71486e-52	1.77334e-50	MED19B	5	1674	Probable mediator of RNA polymerase II transcription subunit 19b [Source:UniProtKB/Swiss-Prot;Acc:Q6NQD9]	-
AT5G10940	1005.05	411.351	1.29187	7.62909e-52	2.01048e-50	-	5	2788	Transducin family protein / WD-40 repeat family protein [Source:UniProtKB/TrEMBL;Acc:Q94BQ3]	WD40
AT2G04041	217.881	16.4526	3.77748	1.18251e-51	3.09974e-50	-	2	564	ECA1 gametogenesis family protein (DUF784) [Source:UniProtKB/TrEMBL;Acc:Q3E7V3]	-
AT4G32660	917.088	271.69	1.74655	1.29973e-51	3.39619e-50	AFC3	4	1901	At4g32660 [Source:UniProtKB/TrEMBL;Acc:A1L4Y9]	Pkinase
AT2G28070	1114.22	359.434	1.62479	1.36273e-51	3.55705e-50	ABCG3	2	2609	ABC transporter G family member 3 [Source:UniProtKB/Swiss-Prot;Acc:Q9ZUU9]	ABC2_membrane
novel.80	389.764	97.7572	1.98867	1.81022e-51	4.69537e-50	-	2	1868	- && Q8W4K3.1 RecName: Full=Cationic amino acid transporter 4, vacuolar && -	-
AT1G78580	3345.48	1448.47	1.20591	2.30788e-51	5.95496e-50	TPS1	1	5341	TPS1 [Source:UniProtKB/TrEMBL;Acc:A0A384L3B9]	-
AT1G47470	292.152	4.42381	6.01791	2.43396e-51	6.26068e-50	-	1	604	Protein of unknown function (DUF784) [Source:TAIR;Acc:AT1G47470]	-
AT4G35420	256.874	22.4711	3.50785	2.71834e-51	6.98489e-50	TKPR1	4	1147	Tetraketide alpha-pyrone reductase 1 [Source:UniProtKB/Swiss-Prot;Acc:Q500U8]	Epimerase
AT1G20920	2860.65	532.381	2.42288	3.02244e-51	7.75017e-50	RH42	1	4902	DEAD-box ATP-dependent RNA helicase 42 [Source:UniProtKB/Swiss-Prot;Acc:Q8H0U8]	DEAD
AT2G17975	268.018	50.4693	2.38554	3.86529e-51	9.87046e-50	-	2	1122	At2g17975 [Source:UniProtKB/TrEMBL;Acc:Q8S8K1]	zf-RanBP
AT5G37130	1353.97	639.68	1.07876	4.30511e-51	1.09484e-49	-	5	2966	Protein prenylyltransferase superfamily protein [Source:UniProtKB/TrEMBL;Acc:F4K5W3]	-
AT3G29810	764.784	332.24	1.2023	5.03031e-51	1.27795e-49	COBL3	3	1706	COBRA-like protein 2 [Source:UniProtKB/Swiss-Prot;Acc:Q8L8Q7]	-
AT4G26760	3225.7	1508.2	1.09638	5.34536e-51	1.3552e-49	MAP65-2	4	2223	MAP65-2 [Source:UniProtKB/TrEMBL;Acc:A0A178V4W3]	-
AT1G78780	449.237	112.809	1.99717	5.41555e-51	1.37159e-49	-	1	1139	pathogenesis-related family protein [Source:TAIR;Acc:AT1G78780]	-
AT3G54230	1917.81	358.599	2.41524	5.44108e-51	1.37596e-49	SUA	3	4060	suppressor of abi3-5 [Source:TAIR;Acc:AT3G54230]	RRM_1
AT3G43540	718.514	307.357	1.22706	5.83777e-51	1.47399e-49	-	3	1629	Initiation factor 4F subunit (DUF1350) [Source:UniProtKB/TrEMBL;Acc:Q9M236]	-
AT3G20250	1014.17	342.297	1.56256	6.2921e-51	1.58709e-49	APUM5	3	3625	Pumilio 5 [Source:UniProtKB/TrEMBL;Acc:A0A178VL84]	PUF
AT3G22750	288.808	65.1932	2.1429	1.12884e-50	2.82713e-49	-	3	2418	Kinase-like protein [Source:UniProtKB/TrEMBL;Acc:Q9LUI6]	Pkinase_Tyr
AT4G19490	1761.49	640.835	1.45515	1.40618e-50	3.51459e-49	VPS54	4	4016	Vacuolar protein sorting-associated protein 54, chloroplastic [Source:UniProtKB/Swiss-Prot;Acc:F4JT76]	-
novel.116	256.732	47.9276	2.42058	1.76225e-50	4.3824e-49	-	3	1452	- && Q93ZA5.1 PUTATIVE PSEUDOGENE: RecName: Full=Putative truncated protein trichome birefringence-like 46 && -	-
AT4G04350	755.421	195.995	1.93795	2.12095e-50	5.26912e-49	EMB2369	4	3081	Leucine--tRNA ligase, chloroplastic/mitochondrial [Source:UniProtKB/Swiss-Prot;Acc:Q9XEA0]	-
AT5G65240	477.164	171.33	1.48044	2.17253e-50	5.39185e-49	-	5	3699	Leucine-rich repeat protein kinase family protein [Source:UniProtKB/TrEMBL;Acc:F4KGL1]	Pkinase
AT2G46590	1097.45	400.11	1.4592	2.51912e-50	6.24574e-49	DOF2.5	2	2459	Dof zinc finger protein DOF2.5 [Source:UniProtKB/Swiss-Prot;Acc:Q9ZPY0]	zf-Dof
AT1G56100	273.695	5.09793	5.72999	2.76e-50	6.82246e-49	-	1	1224	Plant invertase/pectin methylesterase inhibitor superfamily protein [Source:UniProtKB/TrEMBL;Acc:F4I3J6]	-
AT2G19600	858.904	418.491	1.03704	2.97047e-50	7.33536e-49	KEA4	2	2456	K(+) efflux antiporter 4 [Source:UniProtKB/Swiss-Prot;Acc:Q9ZUN3]	Na_H_Exchanger
AT5G09350	438.135	110.326	1.98688	3.1167e-50	7.68113e-49	PI4KB2	5	4265	PI4KBETA2 [Source:UniProtKB/TrEMBL;Acc:A0A178UGA7]	PI3_PI4_kinase
AT5G46400	473.523	133.78	1.81214	3.36542e-50	8.28583e-49	AT PRP39-2	5	3536	Tetratricopeptide repeat (TPR)-like superfamily protein [Source:UniProtKB/TrEMBL;Acc:F4KHG8]	-
AT5G57960	444.796	153.267	1.54786	3.66542e-50	9.00651e-49	-	5	2404	GTP binding protein-like [Source:UniProtKB/TrEMBL;Acc:Q9FJM0]	-
AT5G38140	515.224	44.7537	3.53042	4.27313e-50	1.04789e-48	NFYC10	5	1142	Nuclear transcription factor Y subunit C-10 [Source:UniProtKB/Swiss-Prot;Acc:Q58CM8]	-
AT3G61035	203.202	17.5411	3.56683	6.66173e-50	1.62558e-48	-	3	1816	Cytochrome P450 superfamily protein [Source:UniProtKB/TrEMBL;Acc:F4JD28]	-
AT2G32970	588.9	222.722	1.39993	6.96377e-50	1.69761e-48	-	2	3340	unknown protein; Ha. [Source:TAIR;Acc:AT2G32970]	-
AT5G38360	507.173	197.467	1.3671	7.06377e-50	1.72029e-48	-	5	1471	alpha/beta-Hydrolases superfamily protein [Source:TAIR;Acc:AT5G38360]	-
AT2G21520	2308.58	1063.52	1.11633	7.64202e-50	1.85928e-48	-	2	2634	Sec14p-like phosphatidylinositol transfer family protein [Source:UniProtKB/TrEMBL;Acc:B3H588]	CRAL_TRIO_N
AT4G15540	621.696	148.832	2.05026	8.44745e-50	2.04919e-48	-	4	1932	WAT1-related protein At4g15540 [Source:UniProtKB/Swiss-Prot;Acc:F4JK59]	DUF6
AT3G01310	1235.62	330.639	1.8961	1.02715e-49	2.48194e-48	-	3	3893	Phosphoglycerate mutase-like family protein [Source:UniProtKB/TrEMBL;Acc:F4J8C7]	Acid_phosphat_A
AT4G36380	1404.93	535.045	1.38939	1.38719e-49	3.33885e-48	CYP90C1	4	2397	ROT3 [Source:UniProtKB/TrEMBL;Acc:A0A178V4B0]	p450
AT2G29140	1073.27	401.189	1.41405	1.62039e-49	3.885e-48	APUM3	2	3846	Pumilio homolog 3 [Source:UniProtKB/Swiss-Prot;Acc:Q9ZW02]	PUF
AT1G32540	1140.79	535.332	1.08754	1.6872e-49	4.04126e-48	LOL1	1	2478	lsd one like 1 [Source:TAIR;Acc:AT1G32540]	zf-LSD1
AT4G19990	494.287	98.352	2.31577	2.04031e-49	4.8776e-48	FRS1	4	3197	FAR1-related sequence 1 [Source:UniProtKB/TrEMBL;Acc:F4JU19]	FAR1
AT3G58160	358.849	35.3583	3.31111	2.09009e-49	4.99178e-48	XI-J	3	4517	Myosin-16 [Source:UniProtKB/Swiss-Prot;Acc:Q9M2K0]	Myosin_head
AT1G03090	1112.45	247.429	2.16117	2.51977e-49	5.98906e-48	MCCA	1	2741	Methylcrotonoyl-CoA carboxylase subunit alpha, mitochondrial [Source:UniProtKB/Swiss-Prot;Acc:Q42523]	CPSase_L_D2
AT5G64720	213.233	11.5837	4.27092	2.63142e-49	6.24242e-48	EC1.5	5	529	EC1.5 [Source:UniProtKB/TrEMBL;Acc:A0A178U9F2]	-
AT3G09360	404.579	82.0822	2.28733	2.64928e-49	6.27878e-48	-	3	2360	Cyclin/Brf1-like TBP-binding protein [Source:UniProtKB/TrEMBL;Acc:Q0WVQ3]	-
AT2G36370	200.616	18.6482	3.40421	2.78595e-49	6.59635e-48	FBL11	2	3003	BTB/POZ domain-containing protein FBL11 [Source:UniProtKB/Swiss-Prot;Acc:Q8S8F2]	BTB
AT5G16453	356.92	43.338	3.02988	2.85448e-49	6.75214e-48	-	5	435	Defensin-like protein 24 [Source:UniProtKB/Swiss-Prot;Acc:Q2V371]	-
AT2G25930	1033.47	260.357	1.9826	3.33845e-49	7.88187e-48	ELF3	2	2749	Protein EARLY FLOWERING 3 [Source:UniProtKB/Swiss-Prot;Acc:O82804]	-
AT2G42835	185.626	9.46798	4.30962	3.53027e-49	8.31885e-48	-	2	2718	other RNA [Source:TAIR;Acc:AT2G42835]	-
novel.11	311.894	47.5386	2.74121	4.033e-49	9.47639e-48	-	1	1391	- && - && -	-
AT5G53170	2281.49	965.27	1.23865	4.17005e-49	9.77983e-48	FTSH11	5	2827	ATP-dependent zinc metalloprotease FTSH 11, chloroplastic/mitochondrial [Source:UniProtKB/Swiss-Prot;Acc:Q9FGM0]	AAA
AT1G03000	860.466	360.331	1.25217	7.09978e-49	1.65254e-47	PEX6	1	3295	Peroxisome biogenesis protein 6 [Source:UniProtKB/Swiss-Prot;Acc:Q8RY16]	AAA
AT3G24100	1167.85	514.626	1.18655	8.58829e-49	1.9915e-47	-	3	629	Putative uncharacterized protein AT3g24100 [Source:UniProtKB/TrEMBL;Acc:Q94K36]	-
AT2G22650	375.846	112.848	1.74928	8.94382e-49	2.072e-47	-	2	1737	FAD-dependent oxidoreductase family protein [Source:UniProtKB/TrEMBL;Acc:Q5S4X7]	DAO
AT1G33050	1258.24	434.449	1.53247	9.99253e-49	2.30846e-47	-	1	2954	Uncharacterized protein At1g33050 [Source:UniProtKB/TrEMBL;Acc:Q8VYZ1]	-
AT4G25120	295.019	55.6536	2.40391	1.26248e-48	2.91113e-47	SRS2	4	3785	ATP-dependent DNA helicase SRS2-like protein At4g25120 [Source:UniProtKB/Swiss-Prot;Acc:D1KF50]	UvrD-helicase
AT1G60860	935.764	217.025	2.10006	1.3465e-48	3.09908e-47	AGD2	1	3300	ADP-ribosylation factor GTPase-activating protein AGD2 [Source:UniProtKB/Swiss-Prot;Acc:Q9C6C3]	PH
AT4G24900	367.399	64.2403	2.50505	1.48411e-48	3.40946e-47	TTL	4	1561	TITAN-like protein [Source:UniProtKB/Swiss-Prot;Acc:F4JRR5]	-
AT1G05160	460.923	143.258	1.68553	1.49038e-48	3.42067e-47	KAO1	1	2136	Ent-kaurenoic acid oxidase 1 [Source:UniProtKB/Swiss-Prot;Acc:O23051]	p450
AT4G36690	5035.33	1428.15	1.81669	1.6291e-48	3.73559e-47	U2AF65A	4	2348	U2 snRNP auxiliary factor large subunit [Source:UniProtKB/TrEMBL;Acc:A0A178UYD2]	RRM_1
AT1G45248	263.05	53.7939	2.28166	2.92549e-48	6.65273e-47	-	1	1075	Nucleolar histone methyltransferase-related protein [Source:UniProtKB/TrEMBL;Acc:F4HRC7]	-
AT5G38330	211.918	24.7139	3.06812	2.94294e-48	6.68626e-47	PDF3.1	5	519	Defensin-like protein 181 [Source:UniProtKB/Swiss-Prot;Acc:P82789]	-
AT1G71340	1426.59	575.583	1.3144	3.12924e-48	7.103e-47	GDPD4	1	2416	Glycerophosphodiester phosphodiesterase GDPD4 [Source:UniProtKB/Swiss-Prot;Acc:F4I8H8]	-
AT2G40850	190.949	12.2717	3.89665	3.16689e-48	7.18188e-47	PI4KG1	2	2580	Phosphatidylinositol 4-kinase gamma 1 [Source:UniProtKB/Swiss-Prot;Acc:O22199]	PI3_PI4_kinase
AT2G27950	1077.62	392.54	1.45223	3.23527e-48	7.33021e-47	-	2	3445	Ring/U-Box superfamily protein [Source:UniProtKB/TrEMBL;Acc:F4IHN6]	-
AT1G33400	516.251	168.66	1.61622	3.35482e-48	7.59411e-47	TPR9	1	2723	Tetratricopeptide repeat (TPR)-like superfamily protein [Source:TAIR;Acc:AT1G33400]	-
AT2G32240	1176.47	318.958	1.8768	3.97435e-48	8.96368e-47	-	2	4480	FUNCTIONS IN: molecular_function unknown; INVOLVED IN: response to cadmium ion; LOCATED IN: plasma membrane; EXPRESSED IN: 25 plant structures; EXPRESSED DURING: 13 growth stages; CONTAINS InterPro DOMAIN/s: Prefoldin (InterPro:IPR009053); BEST Arab /.../s thaliana protein match is: unknown protein (TAIR:AT1G05320.3); Ha. [Source:TAIR;Acc:AT2G32240]	-
AT1G79380	781.971	177.795	2.12902	5.22587e-48	1.17435e-46	RGLG4	1	1820	E3 ubiquitin-protein ligase RGLG4 [Source:UniProtKB/Swiss-Prot;Acc:Q9SAL0]	-
AT1G18660	1006.3	425.457	1.24531	6.1238e-48	1.37363e-46	-	1	2462	Zinc finger (C3HC4-type RING finger) family protein [Source:UniProtKB/TrEMBL;Acc:F4ICB5]	-
AT5G35670	803.776	243.869	1.7155	6.76951e-48	1.51572e-46	iqd33	5	1912	IQ-domain 33 [Source:UniProtKB/TrEMBL;Acc:Q8L8M9]	-
AT5G01630	375.039	83.5338	2.14523	7.2112e-48	1.61024e-46	BRCA2B	5	3929	Protein BREAST CANCER SUSCEPTIBILITY 2 homolog B [Source:UniProtKB/Swiss-Prot;Acc:Q7Y1C4]	-
AT5G41370	1347.27	327.951	2.03373	9.7531e-48	2.17391e-46	XPB1	5	2768	General transcription and DNA repair factor IIH helicase subunit XPB1 [Source:UniProtKB/Swiss-Prot;Acc:Q38861]	-
AT1G74170	402.652	90.9798	2.14636	1.40473e-47	3.11701e-46	AtRLP13	1	3692	Receptor-like protein 13 [Source:UniProtKB/Swiss-Prot;Acc:Q9C6A6]	-
AT4G06598	240.438	49.2028	2.27903	1.64735e-47	3.6423e-46	-	4	1087	Uncharacterized protein At4g06598 [Source:UniProtKB/Swiss-Prot;Acc:Q8W3M7]	-
AT1G08720	550.528	199.181	1.45676	1.90677e-47	4.19337e-46	EDR1	1	3260	Serine/threonine-protein kinase EDR1 [Source:UniProtKB/Swiss-Prot;Acc:Q9FPR3]	Pkinase_Tyr
AT5G62570	662.613	183.563	1.84256	2.07175e-47	4.55214e-46	-	5	2983	Calmodulin binding protein-like [Source:TAIR;Acc:AT5G62570]	-
AT5G14770	278.873	62.5985	2.14309	2.61143e-47	5.7075e-46	-	5	3515	Pentatricopeptide repeat-containing protein At5g14770, mitochondrial [Source:UniProtKB/Swiss-Prot;Acc:Q9LER0]	-
AT1G16780	1073.6	482.062	1.15151	2.85499e-47	6.23431e-46	AVPL2	1	2817	Pyrophosphate-energized membrane proton pump 3 [Source:UniProtKB/Swiss-Prot;Acc:Q9FWR2]	-
AT2G04037	191.282	7.47429	4.74866	2.91265e-47	6.35461e-46	-	2	589	Protein of unknown function (DUF784) [Source:TAIR;Acc:AT2G04037]	-
AT1G01920	1090.83	442.455	1.29688	3.30683e-47	7.19557e-46	-	1	2371	SET domain-containing protein [Source:UniProtKB/TrEMBL;Acc:F4HU79]	SET
AT4G11653	247.449	4.50399	5.68248	8.06326e-47	1.73318e-45	RALFL29	4	289	Protein RALF-like 29 [Source:UniProtKB/Swiss-Prot;Acc:A8MQP2]	-
AT1G73980	880.331	295.978	1.56399	9.62197e-47	2.06284e-45	TTM1	1	2637	Inorganic pyrophosphatase TTM1 [Source:UniProtKB/Swiss-Prot;Acc:Q9C9B9]	-
AT3G56690	606.252	214.181	1.49364	1.03754e-46	2.22244e-45	CIP111	3	3453	Calmodulin-interacting protein 111 [Source:UniProtKB/Swiss-Prot;Acc:Q9LET7]	AAA
AT3G19860	929.917	357.945	1.37819	1.49814e-46	3.18697e-45	BHLH121	3	2021	Transcription factor bHLH121 [Source:UniProtKB/Swiss-Prot;Acc:Q9LT23]	HLH
AT3G01270	1232.79	536.472	1.2001	1.57808e-46	3.35413e-45	-	3	1920	Pectate lyase [Source:UniProtKB/TrEMBL;Acc:Q08A70]	-
AT3G59100	659.832	120.76	2.44687	1.72406e-46	3.65812e-45	CALS6	3	6655	Putative callose synthase 6 [Source:UniProtKB/Swiss-Prot;Acc:Q9LYS6]	DUF605
AT3G03040	653.139	260.107	1.32371	1.75616e-46	3.72187e-45	-	3	1960	F-box protein At3g03040 [Source:UniProtKB/Swiss-Prot;Acc:Q9LDJ9]	-
AT3G46850	430.731	90.8714	2.25291	1.75712e-46	3.72187e-45	SBT4.6	3	2231	Subtilisin-like protease SBT4.6 [Source:UniProtKB/Swiss-Prot;Acc:Q9STF7]	Peptidase_S8
AT1G32530	656.757	216.523	1.59715	2.06554e-46	4.36515e-45	MIP1	1	2484	MND1-interacting protein 1 [Source:UniProtKB/Swiss-Prot;Acc:Q8RX22]	-
AT5G28400	301.674	26.6783	3.44567	2.06611e-46	4.36515e-45	-	5	2922	unknown protein; BEST Arabidopsis thaliana protein match is: unknown protein (TAIR:AT5G28320.1); Ha. [Source:TAIR;Acc:AT5G28400]	-
AT3G29797	385.389	2.88824	7.0537	2.47406e-46	5.22257e-45	-	3	538	ECA1 gametogenesis family protein (DUF784) [Source:UniProtKB/TrEMBL;Acc:A8MRH6]	-
novel.48	5082.55	438.693	3.53256	2.63731e-46	5.55768e-45	-	1	4790	- && - && -	-
AT1G10820	742.931	296.187	1.32501	4.19474e-46	8.78726e-45	-	1	1625	Protein of unknown function (DUF3755) [Source:TAIR;Acc:AT1G10820]	-
AT4G29990	245.951	18.3148	3.70613	5.37594e-46	1.12426e-44	-	4	3341	Leucine-rich repeat transmembrane protein kinase protein [Source:UniProtKB/TrEMBL;Acc:Q9SZV2]	Pkinase_Tyr
AT3G12100	404.677	138.826	1.5555	5.41791e-46	1.13208e-44	MTPC2	3	1537	Uncharacterized protein At3g12100 [Source:UniProtKB/TrEMBL;Acc:Q0WSX7]	-
AT5G03910	504.002	207.728	1.27505	5.6665e-46	1.18203e-44	ABCB29	5	2207	ATH12 [Source:UniProtKB/TrEMBL;Acc:A0A178USA1]	ABC_tran
AT3G26080	391.823	127.49	1.61891	5.82547e-46	1.21416e-44	-	3	1194	Plastid-lipid associated protein PAP / fibrillin family protein [Source:UniProtKB/TrEMBL;Acc:A0A1I9LP70]	-
AT3G04690	321.1	80.3472	1.98841	7.99488e-46	1.65793e-44	ANX1	3	3807	ANX1 [Source:UniProtKB/TrEMBL;Acc:A0A178VHY9]	Pkinase_Tyr
AT4G21640	208.461	36.8397	2.50336	8.55475e-46	1.77255e-44	-	4	2202	Subtilase family protein [Source:TAIR;Acc:AT4G21640]	Peptidase_S8
AT1G75120	193.797	22.4641	3.13913	9.07315e-46	1.87839e-44	RRA1	1	1663	Arabinosyltransferase RRA1 [Source:UniProtKB/Swiss-Prot;Acc:Q9C9Q6]	-
AT1G78460	410.394	59.6033	2.8012	1.01049e-45	2.08848e-44	-	1	1050	AT1G78460 protein [Source:UniProtKB/TrEMBL;Acc:Q9SYN5]	-
AT1G33410	2099.4	815.948	1.35993	1.6029e-45	3.28814e-44	SAR1	1	4756	SAR1 [Source:UniProtKB/TrEMBL;Acc:A0A178WF46]	-
AT3G20080	581.664	159.94	1.86648	1.7771e-45	3.63643e-44	CYP705A15	3	4451	Cytochrome P450, family 705, subfamily A, polypeptide 15 [Source:UniProtKB/TrEMBL;Acc:Q9LJZ2]	p450
AT4G29780	752.949	274.067	1.45062	1.87664e-45	3.83694e-44	-	4	2495	Nuclease [Source:UniProtKB/TrEMBL;Acc:Q84J48]	-
AT1G13450	707.082	302.553	1.22611	1.95381e-45	3.99142e-44	GT-1	1	2000	Trihelix transcription factor GT-1 [Source:UniProtKB/Swiss-Prot;Acc:Q9FX53]	-
AT1G17850	359.78	109.265	1.72056	2.21216e-45	4.50803e-44	STR8	1	2011	Rhodanese-like domain-containing protein 8, chloroplastic [Source:UniProtKB/Swiss-Prot;Acc:F4I933]	Rhodanese
AT1G58350	845.849	263.282	1.67731	2.31761e-45	4.71902e-44	ZW18	1	3427	F19C14.4 protein [Source:UniProtKB/TrEMBL;Acc:Q9SLU9]	-
AT1G51520	258.529	57.4369	2.1547	3.41664e-45	6.92262e-44	-	1	2110	RNA-binding (RRM/RBD/RNP motifs) family protein [Source:UniProtKB/TrEMBL;Acc:F4I9J8]	RRM_1
AT3G16940	726.076	303.65	1.25192	3.76367e-45	7.61328e-44	-	3	3859	calmodulin binding;transcription regulators [Source:TAIR;Acc:AT3G16940]	CG-1
AT1G30410	648.397	103.689	2.63428	3.82794e-45	7.72448e-44	ATMRP13	1	5679	multidrug resistance-associated protein 13 [Source:TAIR;Acc:AT1G30410]	ABC_membrane
AT1G18190	713.351	202.331	1.81567	4.23121e-45	8.49645e-44	GC2	1	2295	Golgin candidate 2 [Source:UniProtKB/Swiss-Prot;Acc:B0F9L7]	-
AT1G05580	208.524	7.13047	4.71712	5.68884e-45	1.13772e-43	CHX23	1	2976	Cation/H(+) antiporter 23, chloroplastic [Source:UniProtKB/Swiss-Prot;Acc:Q8VYD4]	Na_H_Exchanger
AT5G66050	955.81	475.713	1.01021	6.02577e-45	1.20413e-43	-	5	2133	Wound-responsive family protein [Source:UniProtKB/TrEMBL;Acc:Q8GWL4]	-
AT3G29185	751.621	304.208	1.29838	6.41001e-45	1.27885e-43	-	3	1955	Glutamate NMDA receptor subunit epsilon-1, putative (DUF3598) [Source:UniProtKB/TrEMBL;Acc:F4J1U2]	-
AT3G63520	2367.24	863.938	1.45319	7.23776e-45	1.44166e-43	CCD1	3	1931	Carotenoid 9,10(9',10')-cleavage dioxygenase 1 [Source:UniProtKB/Swiss-Prot;Acc:O65572]	RPE65
AT5G43513	348.482	3.10069	6.90702	8.13786e-45	1.61964e-43	LURE1.3	5	356	Protein LURE 1.3 [Source:UniProtKB/Swiss-Prot;Acc:Q4VP10]	-
AT1G53440	1327	290.83	2.18372	8.83241e-45	1.75646e-43	-	1	3198	Probable LRR receptor-like serine/threonine-protein kinase At1g53440 [Source:UniProtKB/Swiss-Prot;Acc:C0LGG9]	Pkinase_Tyr
AT1G79950	1057.53	185.827	2.50021	9.29211e-45	1.8464e-43	RTEL1	1	4872	Regulator of telomere elongation helicase 1 homolog [Source:UniProtKB/Swiss-Prot;Acc:F4HQE2]	-
AT4G15200	200.833	14.6279	3.76152	9.71768e-45	1.92941e-43	AFH3	4	2885	formin 3 [Source:TAIR;Acc:AT4G15200]	FH2
AT1G67580	1493.95	720.458	1.04847	1.01272e-44	2.00748e-43	-	1	3200	Protein kinase superfamily protein [Source:UniProtKB/TrEMBL;Acc:Q9CAG1]	Pkinase
AT1G06090	301.414	64.0806	2.25051	1.63123e-44	3.22579e-43	-	1	2313	Delta-9 desaturase-like 1 protein [Source:UniProtKB/Swiss-Prot;Acc:Q9LND9]	-
AT1G79030	670.545	261.243	1.36065	2.51843e-44	4.95645e-43	-	1	2904	Chaperone DnaJ-domain superfamily protein [Source:UniProtKB/TrEMBL;Acc:F4IDH6]	DnaJ
AT1G35660	450.035	139.706	1.6804	2.55731e-44	5.02898e-43	-	1	4748	unknown protein; FUNCTIONS IN: molecular_function unknown; INVOLVED IN: biological_process unknown; LOCATED IN: plasma membrane; EXPRESSED IN: 19 plant structures; EXPRESSED DURING: 11 growth stages; Ha. [Source:TAIR;Acc:AT1G35660]	-
AT5G12960	181.353	9.31395	4.37175	2.88806e-44	5.67487e-43	-	5	2941	Proline-tRNA ligase (DUF1680) [Source:UniProtKB/TrEMBL;Acc:Q84W43]	-
AT1G79740	862.199	243.235	1.81979	3.04121e-44	5.97106e-43	-	1	2764	HAT transposon superfamily [Source:UniProtKB/TrEMBL;Acc:F4HQA2]	DUF659
AT5G23240	174.276	8.27143	4.33249	3.17733e-44	6.23337e-43	DJC76	5	1713	Chaperone protein dnaJ C76, chloroplastic [Source:UniProtKB/Swiss-Prot;Acc:Q9FMX6]	DnaJ
AT5G61730	344.89	77.3142	2.166	3.20617e-44	6.28496e-43	ABCA9	5	3031	ABC transporter A family member 9 [Source:UniProtKB/Swiss-Prot;Acc:Q9FLT5]	ABC_tran
AT1G52000	3353.48	1021.42	1.71332	3.2172e-44	6.30158e-43	JAL5	1	2717	Jacalin-related lectin 5 [Source:UniProtKB/Swiss-Prot;Acc:Q9ZU23]	-
AT3G26085	437.031	139.352	1.65873	3.50724e-44	6.8534e-43	-	3	1414	CAAX amino terminal protease family protein [Source:UniProtKB/TrEMBL;Acc:A8MRZ2]	-
AT4G16680	160.786	12.7267	3.64288	4.30127e-44	8.3785e-43	-	4	4105	P-loop containing nucleoside triphosphate hydrolases superfamily protein [Source:TAIR;Acc:AT4G16680]	HA2
AT3G49290	490.478	152.384	1.6789	4.69991e-44	9.1478e-43	ABIL2	3	1748	At3g49290 [Source:UniProtKB/TrEMBL;Acc:Q147L2]	-
AT4G38470	1614.7	667.174	1.27218	6.66948e-44	1.29711e-42	STY46	4	2627	Serine/threonine-protein kinase STY46 [Source:UniProtKB/Swiss-Prot;Acc:F4JTP5]	Pkinase_Tyr
AT4G08869	252.013	4.31161	6.01958	8.77669e-44	1.70425e-42	-	4	781	Defensin-like protein 210 [Source:UniProtKB/Swiss-Prot;Acc:Q2V3K4]	-
AT3G04160	579.112	58.0873	3.29144	1.09682e-43	2.12478e-42	-	3	2795	unknown protein; Ha. [Source:TAIR;Acc:AT3G04160]	-
AT5G61120	904.35	258.21	1.80045	1.17164e-43	2.26795e-42	-	5	1819	BEST Arabidopsis thaliana protein match is: Polynucleotidyl transferase, ribonuclease H-like superfamily protein (TAIR:AT5G61090.1); Ha. [Source:TAIR;Acc:AT5G61120]	-
novel.127	181.505	8.93675	4.37684	1.4424e-43	2.7877e-42	-	3	1703	- && Q9LTM4.1 RecName: Full=Cytochrome P450 71B19 && PF00067:Cytochrome P450	p450
AT5G51080	340.449	103.423	1.71157	1.5208e-43	2.93693e-42	-	5	1606	AT5G51080 protein [Source:UniProtKB/TrEMBL;Acc:Q84TE0]	-
AT4G12760	281.868	72.0701	1.97427	1.56075e-43	3.01173e-42	-	4	1046	unknown protein; Ha. [Source:TAIR;Acc:AT4G12760]	-
AT5G27890	290.978	28.0896	3.3435	1.84838e-43	3.55289e-42	-	5	1591	BEST Arabidopsis thaliana protein match is: myosin heavy chain-related (TAIR:AT2G15420.1); Ha. [Source:TAIR;Acc:AT5G27890]	-
AT3G16340	425.837	131.885	1.68227	1.93063e-43	3.70811e-42	ABCG29	3	4987	ABC transporter G family member 29 [Source:UniProtKB/Swiss-Prot;Acc:Q94A18]	ABC2_membrane
AT4G24790	632.303	271.425	1.21386	2.00921e-43	3.85005e-42	-	4	3821	Protein STICHEL-like 2 [Source:UniProtKB/Swiss-Prot;Acc:F4JRP8]	-
AT5G41120	355.766	115.376	1.62547	2.20732e-43	4.2264e-42	-	5	2359	Esterase/lipase/thioesterase family protein [Source:UniProtKB/TrEMBL;Acc:Q9FLL7]	-
AT1G70620	3952.87	376.449	3.38974	3.07666e-43	5.88182e-42	-	1	3820	Cyclin-like protein [Source:UniProtKB/TrEMBL;Acc:F4I6U7]	-
AT1G30420	494.707	59.2224	3.04248	3.43603e-43	6.56378e-42	ABCC11	1	5222	ABC transporter C family member 11 [Source:UniProtKB/Swiss-Prot;Acc:Q9C8H1]	ABC_membrane
AT4G21534	290.878	55.279	2.39999	3.50981e-43	6.69437e-42	SPHK2	4	1867	Sphingosine kinase 2 [Source:UniProtKB/Swiss-Prot;Acc:F2Y4A3]	-
AT1G54370	1080.57	512.766	1.07875	3.75012e-43	7.14721e-42	NHX5	1	1875	Sodium/hydrogen exchanger 5 [Source:UniProtKB/Swiss-Prot;Acc:Q8S396]	Na_H_Exchanger
AT4G24810	473.175	188.632	1.32782	4.27692e-43	8.1324e-42	-	4	2547	Protein kinase superfamily protein [Source:UniProtKB/TrEMBL;Acc:F4JRQ4]	ABC1
AT3G61480	1174.7	381.099	1.61951	4.43913e-43	8.43435e-42	-	3	4224	Quinoprotein amine dehydrogenase, beta chain-like RIC1-like guanyl-nucleotide exchange factor [Source:UniProtKB/TrEMBL;Acc:A0A1I9LQF4]	-
AT1G35190	403.619	132.271	1.61171	4.6586e-43	8.84454e-42	-	1	1453	2-oxoglutarate (2OG) and Fe(II)-dependent oxygenase superfamily protein [Source:UniProtKB/TrEMBL;Acc:Q9C6F0]	2OG-FeII_Oxy
AT5G17890	1061.42	259.376	2.02642	4.8748e-43	9.2479e-42	DAR4	5	5329	Protein DA1-related 4 [Source:UniProtKB/Swiss-Prot;Acc:Q9FKN7]	NB-ARC
AT1G08630	683.422	278.306	1.30051	5.48582e-43	1.03831e-41	THA1	1	2096	Probable low-specificity L-threonine aldolase 1 [Source:UniProtKB/Swiss-Prot;Acc:Q8RXU4]	Beta_elim_lyase
AT4G00630	1326.83	515.178	1.36015	6.5901e-43	1.24162e-41	KEA2	4	4275	K+ efflux antiporter 2 [Source:UniProtKB/TrEMBL;Acc:F4JHE9]	Na_H_Exchanger
AT3G51950	7111.46	3115.77	1.18983	7.58499e-43	1.42472e-41	-	3	3157	Zinc finger CCCH domain-containing protein 46 [Source:UniProtKB/Swiss-Prot;Acc:Q9SV09]	RRM_1
AT5G54095	196.283	38.0819	2.34895	7.85932e-43	1.47513e-41	-	5	767	At5g54095 [Source:UniProtKB/TrEMBL;Acc:Q681J0]	-
AT1G10610	223.569	45.3126	2.2941	8.01038e-43	1.50234e-41	BHLH90	1	2010	Transcription factor bHLH90 [Source:UniProtKB/Swiss-Prot;Acc:Q0WNR2]	HLH
AT1G60740	214.378	35.4444	2.61655	8.62132e-43	1.61447e-41	PRXIID	1	825	At1g60740 [Source:UniProtKB/TrEMBL;Acc:B4G289]	-
AT5G18640	581.071	163.49	1.82567	8.953e-43	1.67532e-41	-	5	2016	alpha/beta-Hydrolases superfamily protein [Source:TAIR;Acc:AT5G18640]	Lipase_3
AT5G48140	171.154	15.7938	3.41399	9.63926e-43	1.801e-41	-	5	1545	At5g48140 [Source:UniProtKB/TrEMBL;Acc:Q9LUB8]	-
AT1G13050	189.151	33.9049	2.46023	1.00314e-42	1.87145e-41	-	1	1599	F3F19.7 [Source:UniProtKB/TrEMBL;Acc:Q9SAE0]	-
AT4G22860	578.315	198.62	1.53821	1.1243e-42	2.09589e-41	-	4	2373	At4g22860 [Source:UniProtKB/TrEMBL;Acc:Q4V3C5]	-
AT4G19060	353.152	76.8794	2.17857	1.14167e-42	2.12667e-41	-	4	1385	Probable disease resistance protein At4g19060 [Source:UniProtKB/Swiss-Prot;Acc:Q84WD3]	NB-ARC
AT1G33360	708.872	254.428	1.47546	1.25707e-42	2.3346e-41	CLPX3	1	2999	CLP protease regulatory subunit CLPX3, mitochondrial [Source:UniProtKB/Swiss-Prot;Acc:Q66GN9]	-
AT3G63400	1435.3	659.749	1.11657	1.44359e-42	2.67898e-41	CYP63	3	2362	Peptidyl-prolyl cis-trans isomerase CYP63 [Source:UniProtKB/Swiss-Prot;Acc:Q9LY75]	Pro_isomerase
AT4G34310	506.343	101.546	2.29763	1.61852e-42	2.99912e-41	-	4	4347	Alpha/beta-Hydrolases superfamily protein [Source:UniProtKB/TrEMBL;Acc:F4JKN4]	-
AT5G51070	1472.42	468.394	1.64788	2.01395e-42	3.72068e-41	CLPD	5	3504	Chaperone protein ClpD, chloroplastic [Source:UniProtKB/Swiss-Prot;Acc:P42762]	Clp_N
novel.9	2476.43	272.896	3.17801	2.18508e-42	4.02181e-41	-	1	9119	- && P10978.1 RecName: Full=Retrovirus-related Pol polyprotein from transposon TNT 1-94; Includes: RecName: Full=Protease; Includes: RecName: Full=Reverse transcriptase; Includes: RecName: Full=Endonuclease && PF00098:Zinc knuckle	zf-CCHC
AT4G21410	325.062	59.8027	2.42018	2.44654e-42	4.4797e-41	CRK29	4	3076	Cysteine-rich receptor-like protein kinase 29 [Source:UniProtKB/Swiss-Prot;Acc:Q8S9L6]	Pkinase
AT1G66730	1416.99	194.099	2.86148	2.54396e-42	4.65463e-41	LIG6	1	4724	DNA ligase 6 [Source:UniProtKB/Swiss-Prot;Acc:F4HPZ9]	DNA_ligase_A_M
AT1G01020	315.44	76.6587	2.03089	2.654e-42	4.85239e-41	ARV1	1	1571	ARV1 family protein [Source:UniProtKB/TrEMBL;Acc:Q5MK24]	-
AT2G43370	326.895	115.289	1.50858	3.24188e-42	5.90974e-41	SNRNP35	2	1319	U11/U12 small nuclear ribonucleoprotein 35 kDa protein [Source:UniProtKB/Swiss-Prot;Acc:Q8VY74]	RRM_1
AT4G18540	418.524	116.185	1.83525	3.65352e-42	6.65523e-41	-	4	1770	Transmembrane protein [Source:UniProtKB/TrEMBL;Acc:O49522]	-
AT3G26920	471.698	199.284	1.24657	3.81296e-42	6.93543e-41	-	3	2048	FBD / Leucine Rich Repeat domains containing protein [Source:UniProtKB/TrEMBL;Acc:A0A1I9LRV1]	LRR_2
AT1G60490	1037.9	477.246	1.11647	3.95024e-42	7.17457e-41	ATVPS34	1	2864	Phosphatidylinositol 3-kinase VPS34 [Source:UniProtKB/Swiss-Prot;Acc:P42339]	PI3Ka
AT4G27120	791.771	311.665	1.34	4.32284e-42	7.83978e-41	-	4	1704	DDRGK domain-containing protein 1 [Source:UniProtKB/Swiss-Prot;Acc:Q94C53]	-
AT5G63200	617.263	275.24	1.1604	4.62042e-42	8.36719e-41	-	5	2230	Tetratricopeptide repeat (TPR)-containing protein [Source:UniProtKB/TrEMBL;Acc:Q67YJ9]	TPR_2
AT4G10070	702.798	169.141	2.04484	4.6578e-42	8.42255e-41	-	4	2576	KH domain-containing protein [Source:TAIR;Acc:AT4G10070]	KH_1
AT1G72050	1497.71	464.217	1.68568	5.11108e-42	9.23544e-41	TFIIIA	1	1847	transcription factor IIIA [Source:TAIR;Acc:AT1G72050]	-
novel.5	1181.84	421.028	1.48495	6.10494e-42	1.09991e-40	-	1	2079	- && - && -	-
AT2G24755	440.571	97.7202	2.15781	8.4842e-42	1.52082e-40	-	2	7249	other RNA [Source:TAIR;Acc:AT2G24755]	-
AT2G24205	403.482	2.10862	7.48424	9.69698e-42	1.73444e-40	-	2	415	ECA1 gametogenesis related family protein [Source:UniProtKB/TrEMBL;Acc:A8MQI9]	-
AT3G45420	207.895	26.6998	2.99728	9.85731e-42	1.76184e-40	LECRK14	3	3468	Putative L-type lectin-domain containing receptor kinase I.4 [Source:UniProtKB/Swiss-Prot;Acc:Q9M3D7]	Pkinase
AT3G46590	1175.07	558.732	1.06803	1.09616e-41	1.95498e-40	TRP2	3	2804	Telomere repeat-binding protein 2 [Source:UniProtKB/Swiss-Prot;Acc:Q9SNB9]	-
AT1G27630	644.304	268.188	1.26358	1.13237e-41	2.01809e-40	CYCT1-3	1	2520	Cyclin-T1-3 [Source:UniProtKB/Swiss-Prot;Acc:Q8LBC0]	-
AT1G45229	203.144	25.235	3.01369	1.16e-41	2.06585e-40	-	1	1127	unknown protein; FUNCTIONS IN: molecular_function unknown; INVOLVED IN: biological_process unknown; LOCATED IN: cellular_component unknown; Ha. [Source:TAIR;Acc:AT1G45229]	-
AT1G32200	653.72	314.676	1.05866	1.24986e-41	2.22428e-40	ATS1	1	2105	Glycerol-3-phosphate acyltransferase, chloroplastic [Source:UniProtKB/Swiss-Prot;Acc:Q43307]	Acyltransferase
AT1G22990	239.301	3.42146	6.07956	1.31797e-41	2.34044e-40	HIPP22	1	754	HIPP22 [Source:UniProtKB/TrEMBL;Acc:A0A178WF89]	HMA
AT1G10450	1169.12	295.921	1.97416	1.35542e-41	2.40522e-40	SNL6	1	4242	Paired amphipathic helix protein Sin3-like 6 [Source:UniProtKB/Swiss-Prot;Acc:Q9XIK6]	PAH
AT3G18000	786.924	327.725	1.26218	1.51899e-41	2.69161e-40	NMT1	3	1912	XPL1 [Source:UniProtKB/TrEMBL;Acc:A0A178VHS8]	Methyltransf_11
AT5G55600	1469.87	411.114	1.83443	1.53628e-41	2.7203e-40	-	5	3270	AT5g55600/MDF20_4 [Source:UniProtKB/TrEMBL;Acc:Q8W109]	Agenet
AT1G19397	162.857	7.45536	4.40072	1.56186e-41	2.76361e-40	-	1	857	unknown protein; Ha. [Source:TAIR;Acc:AT1G19397]	-
AT1G21160	946.501	140.176	2.74833	1.61222e-41	2.85068e-40	-	1	4186	Eukaryotic translation initiation factor 2 (eIF-2) family protein (Fragment) [Source:UniProtKB/TrEMBL;Acc:C0SUW8]	GTP_EFTU
AT4G15215	178.373	16.4091	3.46214	1.63853e-41	2.89513e-40	ABCG41	4	5165	ABC transporter G family member 41 [Source:UniProtKB/Swiss-Prot;Acc:Q7PC83]	ABC2_membrane
AT4G29770	259.141	52.1503	2.33358	1.64604e-41	2.90632e-40	-	4	1215	Target of trans acting-siR480/255. [Source:TAIR;Acc:AT4G29770]	-
AT5G06100	457.668	97.1468	2.2162	1.80994e-41	3.19114e-40	MYB33	5	2806	Transcription factor MYB33 [Source:UniProtKB/Swiss-Prot;Acc:Q8W1W6]	-
AT5G63920	771.871	293.871	1.39115	1.81794e-41	3.20297e-40	TOP3A	5	3098	DNA topoisomerase 3-alpha [Source:UniProtKB/Swiss-Prot;Acc:Q9LVP1]	Topoisom_bac
AT5G28000	177.197	18.0135	3.29665	1.94771e-41	3.42673e-40	-	5	700	Major latex-like protein [Source:UniProtKB/TrEMBL;Acc:Q941R5]	-
AT4G03230	530.858	44.3529	3.56053	1.98939e-41	3.49755e-40	-	4	3948	S-locus lectin protein kinase family protein [Source:TAIR;Acc:AT4G03230]	Pkinase_Tyr
AT1G70610	489.111	173.685	1.48611	2.10109e-41	3.6887e-40	ABCB26	1	2478	ABC transporter B family member 26, chloroplastic [Source:UniProtKB/Swiss-Prot;Acc:Q8RY46]	ABC_membrane
AT1G11080	472.604	103.173	2.18773	2.12813e-41	3.73351e-40	scpl31	1	2322	Carboxypeptidase [Source:UniProtKB/TrEMBL;Acc:F4I7C9]	Peptidase_S10
AT3G03340	857.535	313.15	1.44935	2.44516e-41	4.27756e-40	UNE6	3	1925	LUC7 related protein [Source:UniProtKB/TrEMBL;Acc:A0A1I9LRM4]	-
AT2G31650	484.55	151.06	1.66938	2.94017e-41	5.13264e-40	ATX1	2	3615	Histone-lysine N-methyltransferase ATX1 [Source:UniProtKB/Swiss-Prot;Acc:Q9C5X4]	PWWP
AT5G02680	253.435	28.5273	3.11563	3.56985e-41	6.21869e-40	-	5	1020	LOCATED IN: endomembrane system; EXPRESSED IN: 21 plant structures; EXPRESSED DURING: 13 growth stages; BEST Arabidopsis thaliana protein match is: methionine--tRNA ligase, putative / methionyl-tRNA synthetase, putative / MetRS, putative (TAIR:AT4G1 /.../); Ha. [Source:TAIR;Acc:AT5G02680]	-
AT5G26980	553.673	168.92	1.72479	4.32525e-41	7.51341e-40	SYP41	5	2048	Syntaxin-41 [Source:UniProtKB/Swiss-Prot;Acc:O65359]	SNARE
AT3G20780	327.732	98.9454	1.73926	4.34782e-41	7.54731e-40	TOP6B	3	2390	DNA topoisomerase 6 subunit B [Source:UniProtKB/Swiss-Prot;Acc:Q9C5V6]	HATPase_c
AT1G22015	232.662	47.1234	2.314	4.67718e-41	8.10765e-40	B3GALT5	1	1522	DD46 [Source:UniProtKB/TrEMBL;Acc:A0A384KFJ9]	Galactosyl_T
AT3G12140	1242.46	579.208	1.09863	5.11365e-41	8.83946e-40	-	3	2565	EML1 [Source:UniProtKB/TrEMBL;Acc:A0A178VB56]	-
AT2G36740	368.674	98.708	1.88639	5.40681e-41	9.3397e-40	SWC2	2	1899	SWR1 complex subunit 2 [Source:UniProtKB/Swiss-Prot;Acc:F4IP06]	YL1
AT1G05230	508.396	207.387	1.28926	6.62927e-41	1.14194e-39	HDG2	1	4132	AT1G05230 protein [Source:UniProtKB/TrEMBL;Acc:B9DFH8]	START
AT5G51630	187.897	25.7979	2.82725	6.73662e-41	1.15963e-39	-	5	5905	Disease resistance protein (TIR-NBS-LRR class) family [Source:UniProtKB/TrEMBL;Acc:Q0WPW2]	TIR
AT1G76740	356.486	129.8	1.4505	9.12617e-41	1.56878e-39	-	1	4890	Uncharacterized protein F28O16.11 [Source:UniProtKB/TrEMBL;Acc:Q9SRD9]	-
AT1G03050	155.187	17.4976	3.17771	9.30779e-41	1.59666e-39	-	1	2222	Putative clathrin assembly protein At1g03050 [Source:UniProtKB/Swiss-Prot;Acc:Q9SA65]	-
AT1G56460	505.654	141.148	1.82776	9.31924e-41	1.59752e-39	-	1	2270	HIT zinc finger and PAPA-1-like domain-containing protein [Source:UniProtKB/TrEMBL;Acc:Q9C7X2]	-
AT1G61720	152.804	6.89063	4.43328	9.33136e-41	1.59849e-39	BAN	1	1429	Anthocyanidin reductase [Source:UniProtKB/Swiss-Prot;Acc:Q9SEV0]	Epimerase
AT1G58370	202.013	41.645	2.28826	9.73679e-41	1.66563e-39	RXF12	1	3262	glycosyl hydrolase family 10 protein / carbohydrate-binding domain-containing protein [Source:TAIR;Acc:AT1G58370]	-
AT4G10380	405.761	137.333	1.56429	1.10006e-40	1.87923e-39	NIP5-1	4	2170	At4g10380 [Source:UniProtKB/TrEMBL;Acc:A3KPG0]	-
AT1G56612	185.123	24.3626	2.92216	1.16166e-40	1.98036e-39	-	1	1783	other RNA [Source:TAIR;Acc:AT1G56612]	-
AT3G14380	773.152	347.011	1.16221	1.40727e-40	2.39411e-39	-	3	1429	CASP-like protein 2A2 [Source:UniProtKB/Swiss-Prot;Acc:Q9LUL1]	-
AT3G04910	1497.73	643.495	1.2151	1.66379e-40	2.81693e-39	WNK1	3	2907	Serine/threonine-protein kinase WNK1 [Source:UniProtKB/Swiss-Prot;Acc:Q9CAV6]	Pkinase
AT5G16540	566.83	225.356	1.33003	2.27638e-40	3.84356e-39	ZFN3	5	1816	Zinc finger CCCH domain-containing protein 57 [Source:UniProtKB/Swiss-Prot;Acc:Q8L7N8]	zf-CCCH
AT1G55590	511.847	170.617	1.57298	2.713e-40	4.55898e-39	ATB	1	2124	F-box protein At-B [Source:UniProtKB/Swiss-Prot;Acc:Q9ZWC6]	-
AT4G31060	252.319	20.1055	3.64162	2.86796e-40	4.81611e-39	ERF015	4	1372	Ethylene-responsive transcription factor ERF015 [Source:UniProtKB/Swiss-Prot;Acc:Q6NLD5]	AP2
AT1G09195	228.652	37.6828	2.59984	3.12188e-40	5.2354e-39	-	1	3037	FUNCTIONS IN: molecular_function unknown; INVOLVED IN: biological_process unknown; LOCATED IN: mitochondrion; CONTAINS InterPro DOMAIN/s: Metal-dependent phosphohydrolase, HD subdomain (InterPro:IPR006674), Ppx/GppA phosphatase (InterPro:IPR003695). [Source:TAIR;Acc:AT1G09195]	HD
AT4G09020	608.164	211.383	1.52174	3.20135e-40	5.36139e-39	ISA3	4	2746	Isoamylase 3, chloroplastic [Source:UniProtKB/Swiss-Prot;Acc:Q9M0S5]	-
AT5G55840	252.162	37.5474	2.73641	3.39826e-40	5.68347e-39	-	5	4495	Pentatricopeptide repeat (PPR) superfamily protein [Source:TAIR;Acc:AT5G55840]	-
AT5G48090	159.818	9.9597	3.9997	3.49997e-40	5.84961e-39	ELP1	5	2956	EDM2-like protein1 [Source:UniProtKB/TrEMBL;Acc:F4K064]	-
AT1G01448	190.228	26.539	2.83224	3.53602e-40	5.90587e-39	-	1	2386	other RNA [Source:TAIR;Acc:AT1G01448]	Pkinase_Tyr
AT3G26110	153.46	11.0115	3.80767	3.89784e-40	6.48827e-39	-	3	682	Anther-specific protein agp1-like protein [Source:UniProtKB/TrEMBL;Acc:Q3EB02]	-
AT5G56160	190.454	29.2104	2.73696	3.91619e-40	6.51442e-39	SFH14	5	2531	Phosphatidylinositol/phosphatidylcholine transfer protein SFH14 [Source:UniProtKB/Swiss-Prot;Acc:F4K6D3]	-
AT1G71696	569.591	175.302	1.70973	4.5049e-40	7.47862e-39	SOL1	1	2087	Carboxypeptidase SOL1 [Source:UniProtKB/Swiss-Prot;Acc:Q9M9H7]	-
AT5G24750	392.748	144.332	1.45407	4.68635e-40	7.77463e-39	-	5	1955	UDP-Glycosyltransferase superfamily protein [Source:UniProtKB/TrEMBL;Acc:F4KII1]	-
AT3G21810	372.116	112.183	1.71376	5.77869e-40	9.54836e-39	-	3	3103	Zinc finger CCCH domain-containing protein 40 [Source:UniProtKB/Swiss-Prot;Acc:Q93XW7]	zf-CCCH
AT3G04490	1037.56	309.817	1.73811	6.2571e-40	1.03319e-38	-	3	4243	Exportin-4 protein [Source:UniProtKB/TrEMBL;Acc:A0A1I9LPW2]	-
AT3G54800	162.824	5.88154	4.81102	7.06994e-40	1.16353e-38	-	3	2898	AT3G54800 protein [Source:UniProtKB/TrEMBL;Acc:B9DGX7]	START
AT4G38240	818.872	368.031	1.15486	7.29922e-40	1.19966e-38	GNTI	4	1887	Alpha-1,3-mannosyl-glycoprotein 2-beta-N-acetylglucosaminyltransferase [Source:UniProtKB/Swiss-Prot;Acc:Q9XGM8]	-
AT5G06690	186.906	34.709	2.44739	7.6964e-40	1.2641e-38	WCRKC1	5	1275	WCRKC thioredoxin 1 [Source:UniProtKB/TrEMBL;Acc:F4K3Y1]	-
AT5G08110	358.981	92.3263	1.94635	9.00989e-40	1.47396e-38	-	5	3744	nucleic acid binding;ATP-dependent helicases;ATP binding;helicases;ATP-dependent helicases [Source:TAIR;Acc:AT5G08110]	DEAD
AT5G07630	775.744	309.806	1.32142	9.30181e-40	1.51971e-38	-	5	2063	Lipid transporter [Source:UniProtKB/TrEMBL;Acc:F4K836]	-
AT3G60310	250.222	63.5739	1.97442	9.38228e-40	1.53184e-38	-	3	2888	Acyl-CoA synthetase family protein [Source:UniProtKB/TrEMBL;Acc:Q9LY34]	-
AT3G10500	332.119	113.609	1.54435	1.58775e-39	2.57869e-38	NAC053	3	2518	NAC domain-containing protein 53 [Source:UniProtKB/Swiss-Prot;Acc:Q949N0]	NAM
AT1G32700	847.362	328.307	1.36647	1.66447e-39	2.7015e-38	-	1	1641	PLATZ transcription factor family protein [Source:UniProtKB/TrEMBL;Acc:F4IEB6]	-
AT2G13790	340.092	120.345	1.50114	1.75918e-39	2.85148e-38	SERK4	2	2502	Somatic embryogenesis receptor kinase 4 [Source:UniProtKB/Swiss-Prot;Acc:Q9SKG5]	Pkinase
AT1G61490	151.727	19.7181	2.94788	1.76791e-39	2.86376e-38	-	1	3896	G-type lectin S-receptor-like serine/threonine-protein kinase At1g61490 [Source:UniProtKB/Swiss-Prot;Acc:O64770]	Pkinase_Tyr
AT2G39090	532.607	229.79	1.2095	2.51124e-39	4.04137e-38	APC7	2	2042	AtAPC7 [Source:UniProtKB/TrEMBL;Acc:A0A178VSZ9]	-
AT5G55930	419.997	140.519	1.57919	2.82262e-39	4.53952e-38	OPT1	5	2820	Oligopeptide transporter 1 [Source:UniProtKB/Swiss-Prot;Acc:Q9FG72]	OPT
AT3G63480	162.177	18.9068	3.07531	3.01167e-39	4.83725e-38	-	3	1766	ATP binding microtubule motor family protein [Source:TAIR;Acc:AT3G63480]	Kinesin
AT1G01040	1548.19	191.379	3.00866	3.27454e-39	5.25265e-38	DCL1	1	6279	Dicer-like 1 [Source:UniProtKB/TrEMBL;Acc:F4HQG6]	Ribonuclease_3
AT5G20450	348.3	122.778	1.49987	3.83389e-39	6.13001e-38	-	5	2251	CONTAINS InterPro DOMAIN/s: Dilute (InterPro:IPR002710); BEST Arabidopsis thaliana protein match is: Myosin family protein with Dil domain (TAIR:AT5G20490.2); Ha. [Source:TAIR;Acc:AT5G20450]	-
AT5G45190	1089.63	526.681	1.04784	4.07223e-39	6.50689e-38	-	5	2734	Cyclin family protein [Source:UniProtKB/TrEMBL;Acc:F4KD43]	-
AT5G66310	2402.83	631.157	1.92635	4.17913e-39	6.67339e-38	KIN7H	5	4485	Kinesin-like protein KIN-7H [Source:UniProtKB/Swiss-Prot;Acc:F4JZ68]	Kinesin
AT5G43745	510.819	126.21	2.00462	4.36294e-39	6.95791e-38	-	5	2839	Putative ion channel POLLUX-like 2 [Source:UniProtKB/Swiss-Prot;Acc:Q940Y9]	-
AT2G37150	296.717	88.7813	1.74028	4.64115e-39	7.39205e-38	-	2	4846	RING/U-box superfamily protein [Source:UniProtKB/TrEMBL;Acc:F4IQ07]	-
AT5G02670	326.147	58.8009	2.46396	4.67892e-39	7.4474e-38	-	5	1444	BEST Arabidopsis thaliana protein match is: poly(A) polymerase 3 (TAIR:AT3G06560.1); Ha. [Source:TAIR;Acc:AT5G02670]	-
AT5G13870	190.77	28.4824	2.73738	5.18778e-39	8.23614e-38	XTH5	5	1922	Xyloglucan endotransglucosylase/hydrolase [Source:UniProtKB/TrEMBL;Acc:Q67Z90]	-
AT2G21430	498.913	204.341	1.29361	5.59284e-39	8.86782e-38	RD19B	2	1367	Probable cysteine protease RD19B [Source:UniProtKB/Swiss-Prot;Acc:P43295]	Peptidase_C1
AT1G29560	225.009	16.2572	3.7615	6.2069e-39	9.82885e-38	-	1	2268	Zinc finger C-x8-C-x5-C-x3-H type family protein [Source:UniProtKB/TrEMBL;Acc:B3H4U9]	-
AT4G35770	373.102	98.2675	1.94024	6.41732e-39	1.01491e-37	STR15	4	1297	SEN1 [Source:UniProtKB/TrEMBL;Acc:A0A178UYD5]	Rhodanese
AT3G44115	162.26	8.22196	4.23003	7.57407e-39	1.19632e-37	-	3	539	ECA1 gametogenesis family protein (DUF784) [Source:UniProtKB/TrEMBL;Acc:Q3EAQ3]	-
AT5G05310	304.764	74.2332	2.0405	8.55258e-39	1.34829e-37	-	5	2140	TLC ATP/ADP transporter [Source:TAIR;Acc:AT5G05310]	-
AT5G14720	1771.01	680.197	1.37761	8.5747e-39	1.35091e-37	-	5	3182	Protein kinase superfamily protein [Source:UniProtKB/TrEMBL;Acc:Q84WU5]	Pkinase
AT1G02670	252.703	48.5877	2.35828	9.62958e-39	1.51517e-37	-	1	3030	P-loop containing nucleoside triphosphate hydrolases superfamily protein [Source:TAIR;Acc:AT1G02670]	SNF2_N
AT5G56850	646.608	97.9258	2.71131	1.00676e-38	1.58309e-37	-	5	2352	unknown protein; EXPRESSED IN: 21 plant structures; EXPRESSED DURING: 13 growth stages; Ha. [Source:TAIR;Acc:AT5G56850]	-
AT1G17960	183.648	31.701	2.55885	1.03291e-38	1.62317e-37	-	1	1596	Probable threonine--tRNA ligase, cytoplasmic [Source:UniProtKB/Swiss-Prot;Acc:Q8GZ45]	tRNA-synt_2b
AT4G39110	224.778	36.7302	2.61093	1.08243e-38	1.69991e-37	-	4	3246	Probable receptor-like protein kinase At4g39110 [Source:UniProtKB/Swiss-Prot;Acc:Q9T020]	Pkinase_Tyr
AT1G61810	160.999	9.86019	4.01079	1.09443e-38	1.71766e-37	BGLU45	1	2413	Beta-glucosidase 45 [Source:UniProtKB/TrEMBL;Acc:F4HVG0]	Glyco_hydro_1
AT2G25010	707.102	272.453	1.38135	1.16769e-38	1.83032e-37	MAIL1	2	1897	Protein MAIN-LIKE 1 [Source:UniProtKB/Swiss-Prot;Acc:Q9SK32]	-
AT1G63420	1143.67	548.064	1.0669	1.19706e-38	1.87397e-37	-	1	2281	Glycosyltransferase [Source:UniProtKB/TrEMBL;Acc:F4I232]	-
AT1G60985	147.895	7.77057	4.15163	1.44462e-38	2.25581e-37	SCRL6	1	478	Defensin-like protein 247 [Source:UniProtKB/Swiss-Prot;Acc:P82625]	-
AT5G63087	154.57	24.2938	2.69187	1.45236e-38	2.26647e-37	-	5	524	Plant thionin family protein [Source:UniProtKB/TrEMBL;Acc:A8MSA5]	-
AT1G56710	307.314	82.7896	1.88418	1.48031e-38	2.30864e-37	-	1	1835	Pectin lyase-like superfamily protein [Source:UniProtKB/TrEMBL;Acc:Q9FXC1]	-
AT1G76170	221.548	37.9889	2.54955	1.52879e-38	2.38274e-37	-	1	1769	2-thiocytidine tRNA biosynthesis protein, TtcA [Source:TAIR;Acc:AT1G76170]	-
AT2G36720	1397.52	407.489	1.77377	1.56073e-38	2.43098e-37	-	2	3654	Acyl-CoA N-acyltransferase with RING/FYVE/PHD-type zinc finger domain-containing protein [Source:UniProtKB/TrEMBL;Acc:Q8RWG0]	PHD
AT3G43860	153.137	17.3965	3.13678	1.84896e-38	2.87268e-37	AtGH9A4	3	2241	Endoglucanase 16 [Source:UniProtKB/Swiss-Prot;Acc:Q8VYG3]	-
AT4G31000	193.801	38.8314	2.3128	1.96882e-38	3.05316e-37	CBP60F	4	2212	Calmodulin-binding protein 60 F [Source:UniProtKB/Swiss-Prot;Acc:F4JR57]	-
AT2G47220	220.301	39.3354	2.46868	2.00898e-38	3.11348e-37	DUF5	2	2062	DOMAIN OF UNKNOWN FUNCTION 724 5 [Source:TAIR;Acc:AT2G47220]	-
AT5G50030	269.185	76.2848	1.8246	2.0836e-38	3.22509e-37	-	5	898	At5g50030 [Source:UniProtKB/TrEMBL;Acc:Q9FGA8]	-
AT1G21170	650.704	266.001	1.28866	2.48065e-38	3.83725e-37	SEC5B	1	3777	Exocyst complex component SEC5 [Source:TAIR;Acc:AT1G21170]	-
AT1G15200	2359.9	463.846	2.34361	2.71214e-38	4.18747e-37	-	1	1757	Protein-protein interaction regulator family protein [Source:UniProtKB/TrEMBL;Acc:F4HZI8]	-
AT2G33435	754.258	163.509	2.20055	2.78481e-38	4.29699e-37	-	2	4484	RNA-binding (RRM/RBD/RNP motifs) family protein [Source:TAIR;Acc:AT2G33435]	RRM_1
AT1G27510	1238.07	540.016	1.1915	2.87337e-38	4.43086e-37	EX2	1	2359	EX2 [Source:UniProtKB/TrEMBL;Acc:A0A178WE62]	-
AT3G23790	295.855	94.7534	1.63762	3.03215e-38	4.66989e-37	AAE16	3	2716	Probable acyl-activating enzyme 16, chloroplastic [Source:UniProtKB/Swiss-Prot;Acc:Q9LK39]	AMP-binding
AT3G50240	1123.78	168.787	2.72833	3.36251e-38	5.16581e-37	KIN4B	3	3575	Kinesin-like protein KIN-4B [Source:UniProtKB/Swiss-Prot;Acc:Q94LW7]	Kinesin
AT3G21250	2378.27	855.214	1.47249	4.05676e-38	6.20155e-37	MRP6	3	5013	Multidrug resistance-associated protein 6 [Source:UniProtKB/TrEMBL;Acc:A0A1I9LPV5]	ABC_tran
AT3G19020	324.06	100.591	1.67786	4.37879e-38	6.6897e-37	PEX1	3	3414	Pollen-specific leucine-rich repeat extensin-like protein 1 [Source:UniProtKB/Swiss-Prot;Acc:Q9LJ64]	-
AT5G17300	1851.05	886.143	1.06002	4.55481e-38	6.95431e-37	RVE1	5	2017	Protein REVEILLE 1 [Source:UniProtKB/Swiss-Prot;Acc:F4KGY6]	Myb_DNA-binding
AT5G60615	143.37	17.0241	3.09262	4.71974e-38	7.20169e-37	-	5	684	Putative defensin-like protein 274 [Source:UniProtKB/Swiss-Prot;Acc:Q2V2W7]	-
AT3G23980	1125.94	427.581	1.3916	4.90807e-38	7.47982e-37	BLI	3	3150	KOS1 [Source:UniProtKB/TrEMBL;Acc:A0A178VL19]	-
AT1G65540	957.809	406.038	1.23328	4.95914e-38	7.55299e-37	-	1	3003	LETM1-like protein [Source:UniProtKB/TrEMBL;Acc:F4IBH5]	-
AT5G06670	620.674	134.996	2.18999	5.0453e-38	7.67004e-37	-	5	3736	P-loop containing nucleoside triphosphate hydrolases superfamily protein [Source:TAIR;Acc:AT5G06670]	Kinesin
AT4G17910	414.818	157.975	1.39603	6.52248e-38	9.84906e-37	-	4	2001	transferases, transferring acyl groups [Source:TAIR;Acc:AT4G17910]	-
novel.167	775.717	102.055	2.92207	6.83397e-38	1.03068e-36	-	4	11024	- && P10401.1 RecName: Full=Retrovirus-related Pol polyprotein from transposon gypsy; Includes: RecName: Full=Reverse transcriptase; Includes: RecName: Full=Endonuclease && -	-
AT1G50260	327.428	106.071	1.6121	7.12521e-38	1.07395e-36	NTMC2TYPE5.1	1	2601	At1g50260 [Source:UniProtKB/TrEMBL;Acc:Q8L626]	C2
AT2G18050	190.747	17.8757	3.36872	8.77157e-38	1.31888e-36	HIS1-3	2	967	HIS1-3 [Source:UniProtKB/TrEMBL;Acc:A0A178VX64]	-
AT1G71330	146.488	9.50433	3.92261	9.03911e-38	1.35828e-36	NAP5	1	975	Probable non-intrinsic ABC protein 5 [Source:UniProtKB/Swiss-Prot;Acc:Q9FVV9]	ABC_tran
AT4G30910	289.503	54.7586	2.40587	9.69e-38	1.45344e-36	-	4	2175	Cytosol aminopeptidase family protein [Source:TAIR;Acc:AT4G30910]	-
AT1G10130	1468.19	423.246	1.78953	1.00154e-37	1.50043e-36	ECA3	1	3534	Calcium-transporting ATPase 3, endoplasmic reticulum-type [Source:UniProtKB/Swiss-Prot;Acc:Q9SY55]	E1-E2_ATPase
AT5G11470	224.635	51.9424	2.09559	1.0192e-37	1.52504e-36	-	5	2742	bromo-adjacent homology (BAH) domain-containing protein [Source:TAIR;Acc:AT5G11470]	BAH
AT1G73660	1285.64	359.401	1.83388	1.22148e-37	1.8244e-36	SIS8	1	4101	Probable serine/threonine-protein kinase SIS8 [Source:UniProtKB/Swiss-Prot;Acc:Q9C9U5]	Pkinase_Tyr
AT5G27270	502.827	128.735	1.95009	1.25969e-37	1.88033e-36	EMB976	5	3754	Pentatricopeptide repeat-containing protein At5g27270 [Source:UniProtKB/Swiss-Prot;Acc:O04647]	-
AT1G52500	933.292	357.467	1.37994	1.26321e-37	1.88444e-36	FPG1	1	1956	Formamidopyrimidine-DNA glycosylase [Source:UniProtKB/Swiss-Prot;Acc:O80358]	H2TH
AT3G06630	207.367	29.6553	2.76444	1.35698e-37	2.02007e-36	-	3	3762	Protein kinase family protein [Source:UniProtKB/TrEMBL;Acc:A0A1I9LPU6]	Pkinase_Tyr
AT5G53550	309.192	86.0169	1.85215	1.35821e-37	2.02007e-36	YSL3	5	3038	YSL3 [Source:UniProtKB/TrEMBL;Acc:A0A178U7D6]	OPT
AT5G09690	273.261	60.4991	2.19996	1.49328e-37	2.21829e-36	ATMGT7	5	2201	magnesium transporter 7 [Source:TAIR;Acc:AT5G09690]	-
AT3G10380	1824.52	783.327	1.21682	1.53026e-37	2.27186e-36	SEC8	3	4041	SEC8 [Source:UniProtKB/TrEMBL;Acc:A0A178VA38]	-
AT2G24690	551.718	71.4717	2.93276	1.55393e-37	2.30561e-36	-	2	3156	Transcriptional factor B3 family protein [Source:TAIR;Acc:AT2G24690]	B3
AT2G26790	171.118	33.8073	2.32789	1.63013e-37	2.41577e-36	-	2	3630	Pentatricopeptide repeat-containing protein At2g26790, mitochondrial [Source:UniProtKB/Swiss-Prot;Acc:O81028]	-
AT5G60120	435.537	94.1542	2.21394	1.76834e-37	2.61432e-36	TOE2	5	2981	Target of early activation tagged (EAT) 2 [Source:UniProtKB/TrEMBL;Acc:F4JXG9]	AP2
AT1G61500	248.552	44.2567	2.47814	1.88855e-37	2.79039e-36	-	1	3439	S-locus lectin protein kinase family protein [Source:TAIR;Acc:AT1G61500]	Pkinase_Tyr
AT3G24560	240.787	71.5403	1.74597	2.01061e-37	2.96718e-36	RSY3	3	2200	Adenine nucleotide alpha hydrolases-like superfamily protein [Source:UniProtKB/TrEMBL;Acc:F4J7P7]	-
AT3G57840	193.498	10.4393	4.16176	2.14736e-37	3.16333e-36	-	3	465	Plant self-incompatibility protein S1 family [Source:UniProtKB/TrEMBL;Acc:Q9M2R3]	Self-incomp_S1
AT1G05830	1443.74	225.073	2.67651	2.30827e-37	3.3943e-36	ATX2	1	4258	Histone-lysine N-methyltransferase ATX2 [Source:UniProtKB/Swiss-Prot;Acc:P0CB22]	SET
AT1G26150	3327.07	439.92	2.91597	2.38431e-37	3.50404e-36	PERK10	1	3487	Proline-rich receptor-like protein kinase PERK10 [Source:UniProtKB/Swiss-Prot;Acc:Q9C660]	Pkinase_Tyr
AT1G49940	175.794	9.21119	4.2747	2.39508e-37	3.51776e-36	-	1	1841	BEST Arabidopsis thaliana protein match is: Tetratricopeptide repeat (TPR)-like superfamily protein (TAIR:AT1G04770.1); Ha. [Source:TAIR;Acc:AT1G49940]	-
AT1G02060	423.976	119.836	1.81273	2.56406e-37	3.75703e-36	-	1	2225	Pentatricopeptide repeat-containing protein At1g02060, chloroplastic [Source:UniProtKB/Swiss-Prot;Acc:O81908]	PPR
AT1G45223	256.548	2.69313	6.63574	3.02537e-37	4.42248e-36	-	1	580	ECA1 gametogenesis family protein (DUF784) [Source:UniProtKB/TrEMBL;Acc:A7REF3]	-
AT2G32340	141.624	8.90565	3.97413	3.53014e-37	5.1573e-36	-	2	1567	TraB family protein [Source:TAIR;Acc:AT2G32340]	-
AT1G29357	136.795	8.30494	3.98097	3.53862e-37	5.16664e-36	-	1	1835	other RNA [Source:TAIR;Acc:AT1G29357]	-
AT5G54730	426.051	101.116	2.06368	3.6224e-37	5.28583e-36	ATG18F	5	3089	Autophagy-related protein 18f [Source:UniProtKB/Swiss-Prot;Acc:Q9FH32]	-
AT2G01220	1291.39	456.537	1.50545	3.9147e-37	5.70226e-36	-	2	1843	Nucleotidylyl transferase superfamily protein [Source:UniProtKB/TrEMBL;Acc:Q8L845]	CTP_transf_2
AT5G43920	718.641	229.912	1.64146	4.00643e-37	5.83244e-36	WDS	5	2734	WD repeat-containing protein WDS homolog [Source:UniProtKB/Swiss-Prot;Acc:Q9FND4]	WD40
AT1G17260	147.149	7.19867	4.31527	4.45847e-37	6.47145e-36	AHA10	1	2844	Plasma membrane ATPase [Source:UniProtKB/TrEMBL;Acc:A0A178W776]	E1-E2_ATPase
AT2G33980	269.748	43.7133	2.6605	4.8327e-37	6.99821e-36	atnudt22	2	2684	nudix hydrolase homolog 22 [Source:TAIR;Acc:AT2G33980]	NUDIX
AT5G42567	381.477	1.99683	7.62437	4.97322e-37	7.19748e-36	-	5	433	Protein of unknown function (DUF784) [Source:TAIR;Acc:AT5G42567]	-
AT3G48120	283.757	75.3556	1.89654	5.06436e-37	7.3251e-36	-	3	1265	At3g48120 [Source:UniProtKB/TrEMBL;Acc:Q6NQC3]	-
AT5G03406	194.204	35.5546	2.42585	5.85254e-37	8.44536e-36	-	5	1460	Class II aaRS and biotin synthetases superfamily protein [Source:UniProtKB/TrEMBL;Acc:F4KFB0]	-
AT3G02890	924.357	235.107	1.9704	5.96666e-37	8.60501e-36	-	3	3992	RING/FYVE/PHD zinc finger superfamily protein [Source:UniProtKB/TrEMBL;Acc:F4IYH6]	-
AT1G02260	654.987	301.422	1.11371	6.27789e-37	9.04858e-36	-	1	2579	At1g02260 [Source:UniProtKB/TrEMBL;Acc:O81915]	-
AT1G65840	779.292	385.687	1.01555	6.39203e-37	9.20772e-36	PAO4	1	2258	Probable polyamine oxidase 4 [Source:UniProtKB/Swiss-Prot;Acc:Q8H191]	Amino_oxidase
AT3G10010	706.575	118.973	2.56228	7.0159e-37	1.00947e-35	DML2	3	4393	DEMETER-like protein 2 [Source:UniProtKB/Swiss-Prot;Acc:Q9SR66]	-
AT5G56990	199.016	48.0461	2.03086	7.32882e-37	1.05387e-35	-	5	1091	BEST Arabidopsis thaliana protein match is: Cystatin/monellin superfamily protein (TAIR:AT5G56920.1); Ha. [Source:TAIR;Acc:AT5G56990]	-
AT5G63970	221.343	43.7958	2.34207	7.37522e-37	1.05993e-35	RGLG3	5	1690	E3 ubiquitin-protein ligase RGLG3 [Source:UniProtKB/Swiss-Prot;Acc:Q8RX26]	-
AT3G56450	311.026	35.4603	3.16371	8.30763e-37	1.19116e-35	ASNAP1	3	1146	Alpha-soluble NSF attachment protein 1 [Source:UniProtKB/Swiss-Prot;Acc:Q9LXZ5]	-
AT4G19890	290.637	90.3721	1.67719	8.40441e-37	1.20434e-35	-	4	2514	Pentatricopeptide repeat-containing protein At4g19890 [Source:UniProtKB/Swiss-Prot;Acc:P0C8Q3]	-
AT5G06120	1118.78	353.686	1.65585	1.04599e-36	1.49284e-35	-	5	4559	ARM repeat superfamily protein [Source:UniProtKB/TrEMBL;Acc:F4K2C1]	-
novel.7	793.62	348.933	1.18982	1.07382e-36	1.53166e-35	-	1	2425	- && - && -	-
AT4G21430	699.029	182.313	1.93308	1.24096e-36	1.76396e-35	B160	4	2935	Protein B160 [Source:UniProtKB/TrEMBL;Acc:Q8H1S7]	JmjC
AT1G36070	510.598	173.552	1.55222	1.25414e-36	1.78065e-35	-	1	3026	At1g36070 [Source:UniProtKB/TrEMBL;Acc:Q0V7U5]	-
AT1G01980	141.366	10.4617	3.81411	1.29255e-36	1.83308e-35	SEC1A	1	1933	Berberine bridge enzyme-like 1 [Source:UniProtKB/Swiss-Prot;Acc:Q9LPC3]	FAD_binding_4
AT3G03350	168.905	18.3986	3.14317	1.31137e-36	1.85871e-35	-	3	1429	NAD(P)-binding Rossmann-fold superfamily protein [Source:UniProtKB/TrEMBL;Acc:F4J128]	adh_short
AT2G18280	1071.78	505.543	1.08145	1.34784e-36	1.9093e-35	TULP2	2	1955	Tubby-like F-box protein [Source:UniProtKB/TrEMBL;Acc:B9DGB6]	Tub
AT4G30990	2244.26	487.681	2.19952	1.50265e-36	2.12495e-35	-	4	8242	ARM repeat superfamily protein [Source:TAIR;Acc:AT4G30990]	-
AT2G22720	1563.26	600.935	1.3766	1.56529e-36	2.21099e-35	-	2	2375	SPT2 chromatin protein [Source:UniProtKB/TrEMBL;Acc:F4IKF3]	-
AT4G38650	377.549	142.55	1.40793	1.74815e-36	2.46788e-35	-	4	2156	At4g38650 [Source:UniProtKB/TrEMBL;Acc:Q84VX1]	-
AT3G21420	734.91	285.004	1.36511	2.14005e-36	3.00397e-35	-	3	1629	2-oxoglutarate (2OG) and Fe(II)-dependent oxygenase superfamily protein [Source:UniProtKB/TrEMBL;Acc:Q9LIF4]	2OG-FeII_Oxy
AT5G66160	618.968	240.127	1.37159	2.20571e-36	3.09438e-35	RMR1	5	1696	Receptor homology region, transmembrane domain- and RING domain-containing protein 1 [Source:UniProtKB/Swiss-Prot;Acc:Q9M622]	-
AT5G27495	146.667	22.0155	2.72574	2.28553e-36	3.20272e-35	-	5	312	Defensin-like protein 113 [Source:UniProtKB/Swiss-Prot;Acc:Q2V342]	-
AT2G05540	288.787	70.9746	2.04315	2.31413e-36	3.24096e-35	-	2	824	At2g05540/T20G20.11 [Source:UniProtKB/TrEMBL;Acc:Q9SL13]	-
AT5G37590	353.24	107.706	1.72868	2.50447e-36	3.49762e-35	-	5	2044	Tetratricopeptide repeat (TPR)-like superfamily protein [Source:TAIR;Acc:AT5G37590]	-
AT4G11970	315.237	120.47	1.39295	2.89865e-36	4.03672e-35	-	4	2101	YTH family protein [Source:UniProtKB/TrEMBL;Acc:F4JPV2]	YTH
novel.28	177.056	26.761	2.7267	3.15723e-36	4.39187e-35	-	1	1629	- && - && -	-
AT5G44530	307.542	102.682	1.5674	3.20292e-36	4.45042e-35	-	5	3050	Subtilase family protein [Source:TAIR;Acc:AT5G44530]	Peptidase_S8
AT3G07740	440.587	139.205	1.65185	3.21374e-36	4.46294e-35	ADA2A	3	2087	Transcriptional adapter [Source:UniProtKB/TrEMBL;Acc:F4JFM6]	Myb_DNA-binding
AT4G01995	227.011	64.9752	1.8147	3.34354e-36	4.64059e-35	-	4	1274	Beta-carotene isomerase D27 [Source:UniProtKB/TrEMBL;Acc:Q8W4C4]	-
AT1G67500	559.696	130.955	2.08319	3.36639e-36	4.66969e-35	REV3	1	6373	recovery protein 3 [Source:TAIR;Acc:AT1G67500]	DNA_pol_B
AT2G26860	537.227	217.673	1.29606	3.88655e-36	5.38217e-35	-	2	1827	FBD-associated F-box protein At2g26860 [Source:UniProtKB/Swiss-Prot;Acc:Q84X02]	LRR_2
AT3G02030	291.889	65.5242	2.14005	3.91936e-36	5.42456e-35	-	3	2653	Transferase [Source:UniProtKB/TrEMBL;Acc:A0A1I9LSS3]	-
AT1G79460	457.503	182.313	1.32602	4.10195e-36	5.67092e-35	GA2	1	2660	KS1 [Source:UniProtKB/TrEMBL;Acc:A0A178WDK0]	-
AT5G09410	1454.1	410.743	1.82045	4.20857e-36	5.80858e-35	EICBP.B	5	3687	Ethylene induced calmodulin binding protein [Source:UniProtKB/TrEMBL;Acc:F4KCL4]	CG-1
AT3G17227	232.554	46.8271	2.30644	4.80873e-36	6.62427e-35	-	3	686	Plant invertase/pectin methylesterase inhibitor superfamily protein [Source:UniProtKB/TrEMBL;Acc:A0A1I9LPY7]	-
AT3G58820	244.874	50.2835	2.27066	5.55565e-36	7.64645e-35	-	3	1457	Putative F-box protein At3g58820 [Source:UniProtKB/Swiss-Prot;Acc:Q9LXS0]	F-box
AT4G33150	1020.18	237.02	2.09833	5.76188e-36	7.92147e-35	-	4	4024	Lysine-ketoglutarate reductase/saccharopine dehydrogenase bifunctional enzyme [Source:UniProtKB/TrEMBL;Acc:F4JVY8]	Saccharop_dh
AT1G78290	421.881	134.819	1.64321	5.93205e-36	8.15088e-35	SRK2C	1	1868	SRK2C [Source:UniProtKB/TrEMBL;Acc:A0A178W6S8]	Pkinase
AT2G47410	1285.87	259.993	2.29987	6.81681e-36	9.34061e-35	-	2	5894	WD40/YVTN repeat-like-containing domain;Bromodomain [Source:TAIR;Acc:AT2G47410]	WD40
AT5G23050	1345.51	557.796	1.27065	6.9337e-36	9.49552e-35	AAE17	5	2700	Probable acyl-activating enzyme 17, peroxisomal [Source:UniProtKB/Swiss-Prot;Acc:F4KBF3]	AMP-binding
AT4G23190	192.365	30.6561	2.65211	7.25944e-36	9.93611e-35	CRK11	4	2530	Cysteine-rich receptor-like protein kinase 11 [Source:UniProtKB/Swiss-Prot;Acc:Q9ZP16]	Pkinase_Tyr
AT3G24255	264.232	82.2078	1.68134	7.60452e-36	1.03969e-34	-	3	3434	RNA-directed DNA polymerase (Reverse transcriptase)-related family protein [Source:UniProtKB/TrEMBL;Acc:A0A1I9LSY4]	-
AT5G26700	217.361	21.0753	3.39696	7.78679e-36	1.06344e-34	-	5	868	Probable germin-like protein subfamily 2 member 5 [Source:UniProtKB/Swiss-Prot;Acc:O65252]	-
AT5G10490	906.337	419.407	1.11132	8.19293e-36	1.11828e-34	MSL2	5	2557	Mechanosensitive ion channel protein 2, chloroplastic [Source:UniProtKB/Swiss-Prot;Acc:Q56X46]	-
AT5G18065	231.457	52.2713	2.14147	8.70262e-36	1.1872e-34	HTT3	5	1391	unknown protein; BEST Arabidopsis thaliana protein match is: unknown protein (TAIR:AT4G29760.1); Ha. [Source:TAIR;Acc:AT5G18065]	-
AT3G45750	313.127	106.454	1.55596	8.95749e-36	1.22129e-34	-	3	2819	Nucleotidyltransferase family protein [Source:UniProtKB/TrEMBL;Acc:Q7Y216]	-
AT2G23740	900.358	296.293	1.59737	1.0661e-35	1.45116e-34	SUVR5	2	4903	Histone-lysine N-methyltransferase SUVR5 [Source:UniProtKB/Swiss-Prot;Acc:O64827]	SET
AT4G16845	721.361	331.16	1.11878	1.18236e-35	1.60763e-34	VRN2	4	1974	Polycomb group protein VERNALIZATION 2 [Source:UniProtKB/Swiss-Prot;Acc:Q8W5B1]	-
AT1G27420	159.953	19.9886	3.00019	1.18949e-35	1.61644e-34	-	1	1278	Putative F-box/kelch-repeat protein At1g27420 [Source:UniProtKB/Swiss-Prot;Acc:Q9FZJ3]	Kelch_1
AT5G43285	222.51	2.63196	6.26687	1.23703e-35	1.68012e-34	LURE1.1	5	287	Protein LURE 1.1 [Source:UniProtKB/Swiss-Prot;Acc:Q4VP09]	-
AT1G17145	498.368	198.037	1.33352	1.25071e-35	1.69777e-34	DA2L	1	1671	E3 ubiquitin-protein ligase DA2L [Source:UniProtKB/Swiss-Prot;Acc:Q940G8]	-
AT4G22350	340.988	119.599	1.49952	1.3134e-35	1.7809e-34	-	4	2883	Ubiquitin C-terminal hydrolases superfamily protein [Source:UniProtKB/TrEMBL;Acc:F4JL64]	UCH
AT5G03380	893.296	377.403	1.23863	1.5864e-35	2.1499e-34	HIPP06	5	1881	Heavy metal-associated isoprenylated plant protein 6 [Source:UniProtKB/Swiss-Prot;Acc:Q9LZF1]	HMA
AT1G05360	924.631	408.366	1.18241	1.72372e-35	2.33473e-34	KMS2	1	2354	Vacuole membrane protein KMS2 [Source:UniProtKB/Swiss-Prot;Acc:F4I8Q7]	-
AT2G42160	450.092	186.62	1.26488	1.84178e-35	2.4919e-34	BRIZ1	2	1833	BRIZ1 [Source:UniProtKB/TrEMBL;Acc:E5KGE0]	-
novel.40	240.219	61.6538	1.96468	1.88902e-35	2.55441e-34	-	1	5601	- && P92519.1 RecName: Full=Uncharacterized mitochondrial protein AtMg00810; AltName: Full=ORF240b && PF00665:Integrase core domain	rve
AT3G19670	1115.01	213.386	2.38058	2.01872e-35	2.72682e-34	PRP40B	3	3581	Pre-mRNA-processing protein 40B [Source:UniProtKB/Swiss-Prot;Acc:F4JCC1]	FF
AT3G42640	853.858	179.338	2.25141	2.03092e-35	2.7418e-34	AHA8	3	3318	ATPase 8, plasma membrane-type [Source:UniProtKB/Swiss-Prot;Acc:Q9M2A0]	E1-E2_ATPase
AT3G59300	564.844	252	1.15949	2.29199e-35	3.08247e-34	-	3	2615	Pentatricopeptide repeat (PPR) superfamily protein [Source:UniProtKB/TrEMBL;Acc:A0A1I9LM77]	-
AT4G23330	478.986	202.141	1.24028	2.31691e-35	3.11428e-34	-	4	2115	BEST Arabidopsis thaliana protein match is: eukaryotic translation initiation factor 3A (TAIR:AT4G11420.1); Ha. [Source:TAIR;Acc:AT4G23330]	-
AT2G42890	470.604	176.883	1.40549	2.37503e-35	3.18721e-34	ML2	2	3461	ML2 [Source:UniProtKB/TrEMBL;Acc:A0A178VQK0]	RRM_1
AT2G26450	162.122	22.9384	2.80966	2.3843e-35	3.19791e-34	PME13	2	2250	Probable pectinesterase/pectinesterase inhibitor 13 [Source:UniProtKB/Swiss-Prot;Acc:Q7Y201]	-
AT2G41520	840.795	267.036	1.64791	2.3994e-35	3.21642e-34	TPR15	2	3890	TPR15 [Source:UniProtKB/TrEMBL;Acc:A0A178VZX6]	DnaJ
AT2G45920	346.175	17.5508	4.23361	2.49147e-35	3.33622e-34	PUB37	2	2251	U-box domain-containing protein 37 [Source:UniProtKB/Swiss-Prot;Acc:Q683D5]	U-box
AT5G50423	330.679	1.97509	7.41703	2.95422e-35	3.94732e-34	-	5	512	Defensin-like protein 222 [Source:UniProtKB/Swiss-Prot;Acc:Q2V300]	-
AT5G66055	903.301	444.623	1.02296	3.35211e-35	4.46929e-34	AKRP	5	1785	AT5G66055 protein [Source:UniProtKB/TrEMBL;Acc:B9DF91]	-
AT1G70100	805.234	292.369	1.45563	3.39103e-35	4.51875e-34	-	1	2624	unknown protein; BEST Arabidopsis thaliana protein match is: unknown protein (TAIR:AT1G24160.2); Ha. [Source:TAIR;Acc:AT1G70100]	-
AT5G24620	1693.16	148.672	3.50192	3.98666e-35	5.29534e-34	-	5	2033	Pathogenesis-related thaumatin superfamily protein [Source:TAIR;Acc:AT5G24620]	Thaumatin
AT1G15240	1252.85	276.947	2.17131	4.03449e-35	5.35599e-34	-	1	4194	Phox (PX) domain-containing protein [Source:UniProtKB/TrEMBL;Acc:F4HZJ6]	PX
AT3G45850	1498.81	429.669	1.79874	4.08698e-35	5.41986e-34	-	3	3789	P-loop containing nucleoside triphosphate hydrolases superfamily protein [Source:TAIR;Acc:AT3G45850]	Kinesin
AT2G36390	1545.42	632.647	1.28568	5.04126e-35	6.6746e-34	SBE2.1	2	2801	SBE2.1 [Source:UniProtKB/TrEMBL;Acc:A0A178VXI8]	-
AT2G44900	696.843	308.177	1.17256	5.64661e-35	7.4641e-34	FBX5	2	3905	Protein ARABIDILLO 1 [Source:UniProtKB/Swiss-Prot;Acc:O22161]	Arm
AT5G56790	561.361	217.809	1.36213	5.7938e-35	7.65048e-34	-	5	3027	Protein kinase superfamily protein [Source:UniProtKB/TrEMBL;Acc:Q8H0Z8]	Pkinase_Tyr
AT5G43930	815.792	175.47	2.21033	6.12559e-35	8.08428e-34	-	5	2952	Transducin family protein / WD-40 repeat family protein [Source:UniProtKB/TrEMBL;Acc:F4K7D1]	-
AT1G75860	654.79	256.69	1.3489	6.30685e-35	8.31462e-34	-	1	1354	unknown protein; BEST Arabidopsis thaliana protein match is: unknown protein (TAIR:AT1G20100.1); Ha. [Source:TAIR;Acc:AT1G75860]	-
AT4G39340	289.36	75.5115	1.94612	6.91914e-35	9.1121e-34	EC1.4	4	384	Egg cell-secreted protein 1.4 [Source:UniProtKB/Swiss-Prot;Acc:Q9T039]	-
AT5G15020	1746.42	437.092	1.99496	6.93787e-35	9.1319e-34	SNL2	5	4710	Paired amphipathic helix protein Sin3-like 2 [Source:UniProtKB/Swiss-Prot;Acc:Q9LFQ3]	PAH
AT5G28350	1128.54	350.054	1.68203	6.97426e-35	9.17492e-34	-	5	4164	Quinoprotein amine dehydrogenase, beta chain-like RIC1-like guanyl-nucleotide exchange factor [Source:UniProtKB/TrEMBL;Acc:F4K735]	-
AT4G36050	219.686	66.3302	1.73136	7.22913e-35	9.5001e-34	APE2	4	2513	DNA-(apurinic or apyrimidinic site) lyase 2 [Source:UniProtKB/Swiss-Prot;Acc:F4JNY0]	Exo_endo_phos
AT3G44050	703.89	219.047	1.67691	7.62258e-35	1.00065e-33	KIN12E	3	4338	Kinesin-like protein KIN-12E [Source:UniProtKB/Swiss-Prot;Acc:F4J1U4]	Kinesin
AT3G05345	291.127	97.749	1.56632	8.27174e-35	1.08472e-33	-	3	777	Chaperone DnaJ-domain superfamily protein [Source:UniProtKB/TrEMBL;Acc:F4J794]	DnaJ
AT1G30610	421.692	131.3	1.67399	8.3129e-35	1.08929e-33	EMB2279	1	3391	Pentatricopeptide repeat-containing protein At1g30610, chloroplastic [Source:UniProtKB/Swiss-Prot;Acc:Q9SA76]	-
AT1G60200	3783.8	547.488	2.78702	9.61881e-35	1.25537e-33	-	1	4124	Splicing factor PWI domain-containing protein / RNA recognition motif (RRM)-containing protein [Source:UniProtKB/TrEMBL;Acc:Q8VY15]	RRM_1
AT5G05560	787.796	215.125	1.86638	1.09967e-34	1.43217e-33	EMB2771	5	6854	E3 ubiquitin ligase, putative [Source:TAIR;Acc:AT5G05560]	-
AT1G22870	501.481	136.11	1.8713	1.16747e-34	1.51888e-33	-	1	3381	Kinase family with ARM repeat domain-containing protein [Source:UniProtKB/TrEMBL;Acc:F4I313]	Pkinase
AT5G01450	279.349	99.2695	1.49238	1.21026e-34	1.57372e-33	-	5	1917	APD2 [Source:UniProtKB/TrEMBL;Acc:A0A178U8I6]	-
AT2G28450	1039.3	423.264	1.29247	1.22736e-34	1.59512e-33	-	2	2837	Zinc finger CCCH domain-containing protein 24 [Source:UniProtKB/Swiss-Prot;Acc:Q8L7S3]	zf-CCCH
AT3G63240	384.776	163.543	1.23707	1.26192e-34	1.63917e-33	IP5P4	3	2899	Type I inositol polyphosphate 5-phosphatase 4 [Source:UniProtKB/Swiss-Prot;Acc:Q8GTS0]	Exo_endo_phos
AT5G46510	736.365	193.645	1.91635	1.31032e-34	1.70115e-33	-	5	5243	Disease resistance protein (TIR-NBS-LRR class) family [Source:UniProtKB/TrEMBL;Acc:Q9FHF4]	TIR
AT5G09740	461.135	205.367	1.16562	1.77211e-34	2.29585e-33	HAM2	5	1599	Histone acetyltransferase of the MYST family 2 [Source:UniProtKB/Swiss-Prot;Acc:Q9LXD7]	MOZ_SAS
AT4G16280	987.052	205.691	2.2534	1.96181e-34	2.53629e-33	FCA	4	5338	Flowering time control protein FCA [Source:UniProtKB/Swiss-Prot;Acc:O04425]	RRM_1
AT2G02490	135.314	6.10272	4.46679	2.25804e-34	2.91622e-33	-	2	1244	At2g02490 [Source:UniProtKB/TrEMBL;Acc:Q6NLV7]	-
AT1G17040	399.911	171.937	1.21845	2.31146e-34	2.98221e-33	SHA	1	2576	-	-
AT2G45950	425.061	135.676	1.63631	2.34995e-34	3.0286e-33	ASK20	2	2450	SKP1-like protein 20 [Source:UniProtKB/Swiss-Prot;Acc:A8MQG7]	Skp1
AT3G06620	628.538	227.601	1.46592	2.40732e-34	3.0993e-33	-	3	3303	PAS domain-containing protein tyrosine kinase family protein [Source:UniProtKB/TrEMBL;Acc:Q9C902]	Pkinase_Tyr
AT3G49590	913.504	385.992	1.23796	2.47432e-34	3.18224e-33	-	3	2619	Autophagy-related protein 13 [Source:UniProtKB/TrEMBL;Acc:F4IXZ6]	-
AT2G25850	817.148	174.957	2.21509	2.62372e-34	3.36913e-33	PAPS2	2	4009	PAPS2 [Source:UniProtKB/TrEMBL;Acc:A0A178VXR1]	NTP_transf_2
AT5G26000	46205	13252.3	1.8017	3.10552e-34	3.98161e-33	TGG1	5	1893	TGG1 [Source:UniProtKB/TrEMBL;Acc:A0A178U7L7]	Glyco_hydro_1
AT5G20930	545.523	204.335	1.40783	3.22438e-34	4.12971e-33	TOUSLED	5	2648	Serine/threonine-protein kinase TOUSLED [Source:UniProtKB/Swiss-Prot;Acc:Q39238]	Pkinase
AT2G31970	1325.31	193.925	2.76557	3.55468e-34	4.55039e-33	RAD50	2	4466	DNA repair protein RAD50 [Source:UniProtKB/Swiss-Prot;Acc:Q9SL02]	-
AT3G49050	587.305	220.287	1.40904	3.67457e-34	4.699e-33	-	3	2460	Alpha/beta-Hydrolases superfamily protein [Source:UniProtKB/TrEMBL;Acc:Q9SMU2]	Lipase_3
AT3G24840	389.46	144.335	1.42258	4.11164e-34	5.24706e-33	-	3	2848	Sec14p-like phosphatidylinositol transfer family protein [Source:UniProtKB/TrEMBL;Acc:A0A178VMA9]	CRAL_TRIO_N
AT2G47700	839.608	364.403	1.19868	4.47439e-34	5.70115e-33	RFI2	2	1644	E3 ubiquitin-protein ligase RFI2 [Source:UniProtKB/Swiss-Prot;Acc:O82239]	-
AT5G49390	156.257	25.3649	2.63168	4.82811e-34	6.14237e-33	-	5	3170	LOCATED IN: endomembrane system; EXPRESSED IN: 17 plant structures; EXPRESSED DURING: 11 growth stages; BEST Arabidopsis thaliana protein match is: binding (TAIR:AT3G06670.1); Ha. [Source:TAIR;Acc:AT5G49390]	-
AT5G08420	1975.06	861.943	1.19375	5.48761e-34	6.97779e-33	-	5	1648	KRR1 small subunit processome component [Source:UniProtKB/TrEMBL;Acc:A0A178UIZ9]	-
AT2G31530	477.558	192.625	1.30457	5.70993e-34	7.25301e-33	SCY2	2	2101	Preprotein translocase subunit SCY2, chloroplastic [Source:UniProtKB/Swiss-Prot;Acc:F4IQV7]	-
AT2G40570	242.378	67.4607	1.83825	6.09632e-34	7.73985e-33	-	2	2163	At2g40570 [Source:UniProtKB/TrEMBL;Acc:Q7Y230]	-
AT5G66960	242.275	60.8339	1.98502	6.43048e-34	8.14737e-33	-	5	2446	Prolyl oligopeptidase family protein [Source:UniProtKB/TrEMBL;Acc:Q9FGD4]	-
AT1G77890	210.412	45.5503	2.18203	6.46751e-34	8.19008e-33	-	1	2486	At1g77890 [Source:UniProtKB/TrEMBL;Acc:Q147F2]	-
AT1G76710	713.736	252.672	1.49105	6.70081e-34	8.4725e-33	ASHH1	1	2097	SET domain group 26 [Source:TAIR;Acc:AT1G76710]	SET
AT1G14420	135.684	16.9372	2.99349	6.96294e-34	8.79493e-33	AT59	1	1996	Probable pectate lyase 3 [Source:UniProtKB/Swiss-Prot;Acc:Q9M9S2]	-
AT5G08230	1119.72	126.099	3.14466	7.17936e-34	9.05442e-33	HULK1	5	5419	Protein HUA2-LIKE 1 [Source:UniProtKB/Swiss-Prot;Acc:Q9LEY4]	PWWP
AT3G58900	345.183	78.9343	2.15243	7.52957e-34	9.47675e-33	-	3	1957	F-box/RNI-like superfamily protein [Source:UniProtKB/TrEMBL;Acc:F4J721]	F-box
AT1G61430	218.662	45.997	2.25618	8.0841e-34	1.0154e-32	-	1	3638	G-type lectin S-receptor-like serine/threonine-protein kinase At1g61430 [Source:UniProtKB/Swiss-Prot;Acc:O64777]	Pkinase_Tyr
novel.55	157.472	21.1491	2.86041	9.57457e-34	1.19956e-32	-	2	6204	- && P10978.1 RecName: Full=Retrovirus-related Pol polyprotein from transposon TNT 1-94; Includes: RecName: Full=Protease; Includes: RecName: Full=Reverse transcriptase; Includes: RecName: Full=Endonuclease && PF13456:Reverse transcriptase-like	-
AT5G64240	330.722	79.2308	2.04404	9.8127e-34	1.22788e-32	AMC3	5	1627	Metacaspase-3 [Source:UniProtKB/Swiss-Prot;Acc:Q9FMG1]	Peptidase_C14
AT2G02910	524.552	248.566	1.08003	1.00004e-33	1.25038e-32	-	2	1911	At2g02910 [Source:UniProtKB/TrEMBL;Acc:A4IJ37]	-
AT4G29890	564.49	121.254	2.23412	1.09366e-33	1.36674e-32	-	4	1397	Choline monooxygenase, chloroplastic [Source:UniProtKB/Swiss-Prot;Acc:Q9SZR0]	-
AT5G65060	397.124	162.598	1.29659	1.1107e-33	1.38593e-32	MAF3	5	1464	Agamous-like MADS-box protein AGL70 [Source:UniProtKB/Swiss-Prot;Acc:Q9LSR7]	SRF-TF
AT1G01780	198.349	46.3243	2.09648	1.1147e-33	1.39023e-32	PLIM2B	1	939	LIM domain-containing protein PLIM2b [Source:UniProtKB/Swiss-Prot;Acc:Q1ECF5]	LIM
AT1G26930	708.063	311.136	1.18592	1.12873e-33	1.40702e-32	-	1	1873	F-box/kelch-repeat protein At1g26930 [Source:UniProtKB/Swiss-Prot;Acc:Q84M94]	Kelch_1
AT5G19390	1664.64	780.867	1.08873	1.19309e-33	1.48425e-32	ROPGAP7	5	3634	Rho GTPase-activating protein 7 [Source:UniProtKB/Swiss-Prot;Acc:Q8RWQ4]	RhoGAP
novel.156	306.518	76.2542	2.01423	1.22532e-33	1.52358e-32	-	4	1197	- && - && -	-
AT5G44973	147.819	4.23858	5.14088	1.22784e-33	1.52594e-32	-	5	474	Defensin-like protein 285 [Source:UniProtKB/Swiss-Prot;Acc:Q2V315]	-
AT5G44480	186.923	44.2098	2.07531	1.23233e-33	1.53076e-32	DUR	5	1927	Putative UDP-arabinose 4-epimerase 4 [Source:UniProtKB/Swiss-Prot;Acc:Q9FI17]	-
AT1G29030	649.497	284.74	1.18225	1.25027e-33	1.55226e-32	-	1	1997	Apoptosis inhibitory protein 5 (API5) [Source:UniProtKB/TrEMBL;Acc:Q8GXH2]	-
AT2G23990	190.37	22.84	3.06916	1.35818e-33	1.68453e-32	ENODL11	2	925	Early nodulin-like protein 11 [Source:UniProtKB/TrEMBL;Acc:F4INN8]	Cu_bind_like
AT2G34090	272.839	96.7319	1.49597	1.48695e-33	1.83964e-32	MEE18	2	1890	maternal effect embryo arrest 18 [Source:TAIR;Acc:AT2G34090]	-
AT4G32730	969.146	227.944	2.08362	1.59948e-33	1.97786e-32	PC-MYB1	4	3874	Homeodomain-like protein [Source:UniProtKB/TrEMBL;Acc:F4JV48]	Myb_DNA-binding
AT4G10930	986.452	224.294	2.13163	1.62238e-33	2.00519e-32	-	4	4075	unknown protein; LOCATED IN: cellular_component unknown; EXPRESSED IN: 23 plant structures; EXPRESSED DURING: 14 growth stages; Ha. [Source:TAIR;Acc:AT4G10930]	PHD
AT2G31500	126.151	8.39657	3.86691	1.65769e-33	2.04678e-32	CPK24	2	2305	Calcium-dependent protein kinase 24 [Source:UniProtKB/Swiss-Prot;Acc:Q9SIQ7]	Pkinase
AT4G00040	795.19	78.714	3.32203	1.66042e-33	2.04913e-32	-	4	1366	Type III polyketide synthase C [Source:UniProtKB/Swiss-Prot;Acc:O81305]	Chal_sti_synt_N
AT1G56415	173.18	3.91781	5.59999	1.74124e-33	2.14565e-32	-	1	499	Expressed protein [Source:TAIR;Acc:AT1G56415]	-
AT5G22320	632.393	278.906	1.181	1.75741e-33	2.16234e-32	-	5	1736	AT5g22320/MWD9_11 [Source:UniProtKB/TrEMBL;Acc:Q9FMS0]	-
AT5G65660	746.07	362.619	1.03879	1.78329e-33	2.192e-32	-	5	1436	Uncharacterized protein At5g65660 [Source:UniProtKB/Swiss-Prot;Acc:Q9LSK9]	-
AT1G68710	1550.17	371.861	2.05595	1.79758e-33	2.20737e-32	-	1	4866	ATPase E1-E2 type family protein / haloacid dehalogenase-like hydrolase family protein [Source:TAIR;Acc:AT1G68710]	-
AT5G02830	656.855	231.505	1.4939	1.90804e-33	2.34069e-32	-	5	2855	Pentatricopeptide repeat-containing protein At5g02830, chloroplastic [Source:UniProtKB/Swiss-Prot;Acc:Q8GYL7]	-
AT3G27990	456.017	71.8276	2.66392	1.9205e-33	2.3548e-32	-	3	5171	other RNA [Source:TAIR;Acc:AT3G27990]	-
AT3G26890	853.605	232.259	1.87247	2.02577e-33	2.48019e-32	-	3	3620	AT3G26890 protein [Source:UniProtKB/TrEMBL;Acc:Q949N7]	-
AT3G27700	965.461	394.468	1.28733	2.07504e-33	2.538e-32	-	3	3912	Uncharacterized protein At3g27700 (Fragment) [Source:UniProtKB/TrEMBL;Acc:C0SVD1]	RRM_1
AT2G35060	2315.05	858.496	1.42901	2.497e-33	3.04807e-32	KUP11	2	3447	Potassium transporter [Source:UniProtKB/TrEMBL;Acc:F4IIZ3]	K_trans
AT1G20060	263.9	53.4184	2.27566	2.53806e-33	3.09666e-32	-	1	3431	ATP binding microtubule motor family protein [Source:TAIR;Acc:AT1G20060]	Kinesin
AT2G43080	633.83	263.504	1.2682	3.17129e-33	3.85783e-32	P4H1	2	1391	Prolyl 4-hydroxylase 1 [Source:UniProtKB/Swiss-Prot;Acc:Q9ZW86]	-
AT4G39050	1484.02	434.681	1.76759	3.44915e-33	4.19172e-32	KIN7D	4	3889	Kinesin-like protein KIN-7D, mitochondrial [Source:UniProtKB/Swiss-Prot;Acc:Q8W5R5]	Kinesin
AT4G08025	367.17	1.36694	7.83489	3.46001e-33	4.20284e-32	-	4	582	ECA1 gametogenesis family protein (DUF784) [Source:UniProtKB/TrEMBL;Acc:Q1PEB1]	-
AT1G11593	125.519	10.6391	3.59888	3.50094e-33	4.25048e-32	-	1	608	Plant invertase/pectin methylesterase inhibitor superfamily protein [Source:UniProtKB/TrEMBL;Acc:F4I8Y4]	-
AT3G21290	671.022	187.136	1.83362	3.72272e-33	4.51531e-32	-	3	4210	Dentin sialophosphoprotein-like protein [Source:UniProtKB/TrEMBL;Acc:F4IXI9]	-
AT2G25660	1191.14	291.357	2.02774	3.83805e-33	4.65291e-32	emb2410	2	7962	Embryo defective 2410 [Source:UniProtKB/TrEMBL;Acc:F4ISL7]	-
AT2G38600	115.838	9.29502	3.63376	4.03264e-33	4.88162e-32	-	2	1320	HAD superfamily, subfamily IIIB acid phosphatase [Source:UniProtKB/TrEMBL;Acc:Q9ZVI2]	-
AT3G51150	1519.93	358.282	2.08094	4.11415e-33	4.97785e-32	KIN7G	3	4264	Kinesin-like protein KIN-7G [Source:UniProtKB/Swiss-Prot;Acc:F4J394]	Kinesin
AT4G23000	295.01	52.7424	2.45899	4.22403e-33	5.10581e-32	-	4	4073	Calcineurin-like metallo-phosphoesterase superfamily protein [Source:TAIR;Acc:AT4G23000]	Metallophos
AT1G05200	432.561	111.895	1.94675	4.35519e-33	5.2592e-32	GLR3.4	1	3783	Glutamate receptor [Source:UniProtKB/TrEMBL;Acc:Q53YX3]	ANF_receptor
AT3G20150	672.925	201.674	1.73197	4.76802e-33	5.7437e-32	KIN12F	3	4126	Kinesin-like protein KIN-12F [Source:UniProtKB/Swiss-Prot;Acc:F4JDI6]	Kinesin
AT1G71240	386.969	153.179	1.3463	4.9005e-33	5.89754e-32	-	1	2918	Plant protein of unknown function (DUF639) [Source:TAIR;Acc:AT1G71240]	-
AT5G18630	450.538	165.603	1.43913	4.98758e-33	5.99941e-32	-	5	1760	Alpha/beta-Hydrolases superfamily protein [Source:UniProtKB/TrEMBL;Acc:Q6DBI3]	Lipase_3
AT5G41850	160.482	30.2316	2.41992	5.06196e-33	6.08593e-32	-	5	927	Alpha/beta-Hydrolases superfamily protein [Source:UniProtKB/TrEMBL;Acc:Q9FJ29]	-
AT5G43500	481.076	216.08	1.1555	5.12634e-33	6.16033e-32	ARP9	5	2635	Actin-related protein 9 [Source:UniProtKB/Swiss-Prot;Acc:Q9LSW2]	Actin
AT1G48310	281.293	97.0867	1.53212	5.25061e-33	6.3066e-32	CHR18	1	2515	chromatin remodeling factor18 [Source:TAIR;Acc:AT1G48310]	SNF2_N
AT5G57590	427.998	162.352	1.38637	5.35758e-33	6.42883e-32	BIO3-BIO1	5	2779	Bifunctional dethiobiotin synthetase/7,8-diamino-pelargonic acid aminotransferase, mitochondrial [Source:UniProtKB/Swiss-Prot;Acc:B0F481]	Aminotran_3
novel.47	168.097	11.5024	3.8033	7.58112e-33	9.05303e-32	-	1	2133	- && Q9C8D4.1 RecName: Full=Butyrate--CoA ligase AAE11, peroxisomal; AltName: Full=Acyl-activating enzyme 11; AltName: Full=Butyryl-CoA synthetase && -	-
AT2G02410	304.749	78.5333	1.96707	8.07447e-33	9.63285e-32	-	2	1794	unknown protein; CONTAINS InterPro DOMAIN/s: Protein of unknown function DUF901 (InterPro:IPR010298); Ha. [Source:TAIR;Acc:AT2G02410]	-
AT2G35250	214.737	55.3311	1.94862	9.13451e-33	1.0887e-31	-	2	1038	NEP-interacting protein, putative (DUF239) [Source:UniProtKB/TrEMBL;Acc:O82168]	-
AT5G25770	419.172	90.7726	2.19259	9.13451e-33	1.0887e-31	-	5	1831	Alpha/beta-Hydrolases superfamily protein [Source:UniProtKB/TrEMBL;Acc:A8MQE3]	-
AT3G04810	705.1	291.13	1.27075	9.39257e-33	1.11892e-31	NEK2	3	2779	Serine/threonine-protein kinase Nek2 [Source:UniProtKB/Swiss-Prot;Acc:Q9CAU7]	Pkinase
AT1G71810	305.325	106.458	1.51294	9.73132e-33	1.15815e-31	-	1	2487	Uncharacterized aarF domain-containing protein kinase At1g71810, chloroplastic [Source:UniProtKB/Swiss-Prot;Acc:Q94BU1]	ABC1
AT3G07700	849.372	393.284	1.11095	9.84529e-33	1.17115e-31	-	3	2911	Protein kinase superfamily protein [Source:UniProtKB/TrEMBL;Acc:F4JFM1]	ABC1
AT5G14090	126.354	11.3835	3.48125	1.0025e-32	1.19138e-31	LA1	5	1754	Protein LAZY 1 [Source:UniProtKB/Swiss-Prot;Acc:Q5XV40]	-
AT5G02880	1910.73	301.881	2.65772	1.15615e-32	1.37046e-31	UPL4	5	5200	E3 ubiquitin-protein ligase UPL4 [Source:UniProtKB/Swiss-Prot;Acc:Q9LYZ7]	HECT
AT5G04020	382.833	59.2531	2.6807	1.15651e-32	1.37046e-31	PICBP	5	5083	calmodulin binding [Source:TAIR;Acc:AT5G04020]	-
AT3G43210	464.074	149.706	1.63564	1.35195e-32	1.59975e-31	KIN7B	3	3607	Kinesin-like protein KIN-7B [Source:UniProtKB/Swiss-Prot;Acc:Q8LNZ2]	Kinesin
AT1G03780	897.394	243.905	1.87383	1.36922e-32	1.61941e-31	TPX2	1	2906	Protein TPX2 [Source:UniProtKB/Swiss-Prot;Acc:F4I2H7]	-
AT2G36950	486.623	197.476	1.29109	1.41636e-32	1.67356e-31	HIPP05	2	1702	Heavy metal-associated isoprenylated plant protein 5 [Source:UniProtKB/Swiss-Prot;Acc:Q9SJL2]	HMA
AT3G55630	390.924	99.472	1.98806	1.43983e-32	1.69887e-31	FPGS3	3	1999	Folylpolyglutamate synthase [Source:UniProtKB/Swiss-Prot;Acc:Q8W035]	-
AT2G25964	484.989	122.644	1.99131	1.49608e-32	1.76439e-31	-	2	649	Putative uncharacterized protein [Source:UniProtKB/TrEMBL;Acc:Q0WR94]	-
AT5G63960	1013.47	412.262	1.29174	1.55873e-32	1.8374e-31	-	5	3591	DNA polymerase [Source:UniProtKB/TrEMBL;Acc:F4KC69]	DNA_pol_B
AT5G58510	745.304	185.875	1.99441	1.61187e-32	1.89822e-31	-	5	3369	Rab3 GTPase-activating protein catalytic protein [Source:UniProtKB/TrEMBL;Acc:Q8RWW8]	-
AT2G20320	293.879	97.536	1.58724	1.66821e-32	1.9627e-31	-	2	3859	DENN (AEX-3) domain-containing protein [Source:UniProtKB/TrEMBL;Acc:F4IUH2]	DENN
AT3G48190	1194.92	179.547	2.72988	1.85733e-32	2.18314e-31	ATM	3	9734	Serine/Threonine-kinase ATM-like protein [Source:UniProtKB/TrEMBL;Acc:A0A1I9LQ79]	PI3_PI4_kinase
AT1G15520	201.453	37.2418	2.40843	1.91874e-32	2.25425e-31	ABCG40	1	4641	ABC transporter G family member 40 [Source:UniProtKB/Swiss-Prot;Acc:Q9M9E1]	ABC2_membrane
AT5G66810	499.504	187.558	1.40516	1.98817e-32	2.3336e-31	-	5	2796	CONTAINS InterPro DOMAIN/s: CTLH, C-terminal LisH motif (InterPro:IPR006595); BEST Arabidopsis thaliana protein match is: LisH and RanBPM domains containing protein (TAIR:AT1G61150.1); Ha. [Source:TAIR;Acc:AT5G66810]	-
AT5G27600	729.479	364.842	1.00187	2.02605e-32	2.3758e-31	LACS7	5	2456	Long chain acyl-CoA synthetase 7, peroxisomal [Source:UniProtKB/Swiss-Prot;Acc:Q8LKS5]	AMP-binding
AT5G48953	166.471	26.1184	2.67094	2.10265e-32	2.46328e-31	LCR86	5	361	Defensin-like protein 76 [Source:UniProtKB/Swiss-Prot;Acc:P82795]	-
AT5G10965	136.208	13.115	3.34285	2.20575e-32	2.58162e-31	-	5	2945	-	-
AT2G25350	305.435	84.0624	1.8517	2.22267e-32	2.60019e-31	-	2	2856	Phox (PX) domain-containing protein [Source:TAIR;Acc:AT2G25350]	PX
AT5G35560	676.01	191.016	1.81617	2.23118e-32	2.60892e-31	-	5	2966	DENN (AEX-3) domain-containing protein [Source:UniProtKB/TrEMBL;Acc:F4JZV9]	DENN
AT5G18245	186.115	25.9518	2.88442	2.35762e-32	2.75416e-31	-	5	3305	other RNA [Source:TAIR;Acc:AT5G18245]	-
AT2G07040	177.894	39.5281	2.15691	2.36016e-32	2.75582e-31	PRK2	2	2781	Pollen receptor-like kinase 2 [Source:UniProtKB/Swiss-Prot;Acc:Q84JQ4]	Pkinase
AT3G14205	1085.73	323.348	1.74488	2.37374e-32	2.77038e-31	SAC2	3	3866	Phosphoinositide phosphatase SAC2 [Source:UniProtKB/Swiss-Prot;Acc:Q94A27]	-
AT2G36810	878.652	256.002	1.77189	2.61471e-32	3.04873e-31	SGR6	2	5789	Protein SHOOT GRAVITROPISM 6 [Source:UniProtKB/Swiss-Prot;Acc:F4IP13]	-
AT3G07273	128.428	20.444	2.6406	2.72446e-32	3.17519e-31	-	3	311	unknown protein; Ha. [Source:TAIR;Acc:AT3G07273]	-
AT2G29890	1228.47	261.339	2.22732	2.77594e-32	3.23366e-31	VLN1	2	3288	Villin-like 1 [Source:UniProtKB/TrEMBL;Acc:F4ILN8]	-
AT1G23000	850.578	390.762	1.12711	2.93049e-32	3.41049e-31	-	1	1773	Heavy metal transport/detoxification superfamily protein [Source:TAIR;Acc:AT1G23000]	HMA
AT1G32810	977.581	330.864	1.55938	2.93532e-32	3.4145e-31	-	1	3878	Location of EST 206I21T7, gb [Source:UniProtKB/TrEMBL;Acc:Q9MAQ7]	-
AT1G05490	3045.24	867.9	1.80897	2.99712e-32	3.48476e-31	CLSY3	1	4735	SNF2 domain-containing protein CLASSY 3 [Source:UniProtKB/Swiss-Prot;Acc:F4I8S3]	SNF2_N
AT3G49307	118.159	12.504	3.20386	3.40524e-32	3.95184e-31	-	3	538	At3g49307 [Source:UniProtKB/TrEMBL;Acc:B1WCA5]	-
AT5G43155	133.119	10.1386	3.69205	3.65789e-32	4.24106e-31	-	5	717	QWRF motif protein [Source:UniProtKB/TrEMBL;Acc:A0A1P8BC48]	-
AT3G09530	127.304	9.20531	3.81253	3.74827e-32	4.33974e-31	ATEXO70H3	3	2528	Exocyst subunit Exo70 family protein [Source:UniProtKB/TrEMBL;Acc:Q9SF50]	Exo70
AT1G45231	369.956	136.429	1.42981	3.77865e-32	4.37286e-31	-	1	1946	S-adenosyl-L-methionine-dependent methyltransferases superfamily protein [Source:UniProtKB/TrEMBL;Acc:F4HRC0]	WW
AT5G61450	532.756	225.394	1.23727	3.82044e-32	4.41709e-31	-	5	1850	P-loop containing nucleoside triphosphate hydrolases superfamily protein [Source:UniProtKB/TrEMBL;Acc:Q9FII8]	-
AT4G35780	670.387	293.128	1.1912	4.07472e-32	4.70448e-31	STY17	4	2288	Serine/threonine-protein kinase STY17 [Source:UniProtKB/Swiss-Prot;Acc:Q8RWL6]	Pkinase_Tyr
AT5G08470	809.282	277.383	1.53754	4.44238e-32	5.12658e-31	PEX1	5	4146	Peroxisome biogenesis protein 1 [Source:UniProtKB/Swiss-Prot;Acc:Q9FNP1]	AAA
AT5G47900	238.622	75.3776	1.66628	5.16543e-32	5.93881e-31	-	5	2423	Protein of unknown function (DUF1624) [Source:TAIR;Acc:AT5G47900]	-
AT1G80420	500.098	189.792	1.38966	5.21591e-32	5.99405e-31	XRCC1	1	2077	DNA-repair protein XRCC1 [Source:UniProtKB/Swiss-Prot;Acc:Q24JK4]	BRCT
AT3G14010	1489.9	526.062	1.49896	5.51001e-32	6.32615e-31	CID4	3	3340	CTC-interacting domain 4 [Source:UniProtKB/TrEMBL;Acc:A0A1I9LLC0]	-
AT5G23380	309.239	106.13	1.53376	5.5377e-32	6.35498e-31	-	5	1857	Gb [Source:UniProtKB/TrEMBL;Acc:Q9FGE1]	-
AT5G65450	346.484	93.1107	1.88351	5.58279e-32	6.40376e-31	UBP17	5	2759	ubiquitin-specific protease 17 [Source:TAIR;Acc:AT5G65450]	UCH
AT2G19260	326.801	101.699	1.67088	5.86376e-32	6.72292e-31	-	2	2738	RING/FYVE/PHD zinc finger superfamily protein [Source:UniProtKB/TrEMBL;Acc:F4ISG1]	PHD
AT1G27070	389.047	173.65	1.16169	6.10698e-32	6.98972e-31	PTST2	1	2161	Protein PTST homolog 2, chloroplastic [Source:UniProtKB/Swiss-Prot;Acc:Q9LFY0]	-
AT4G36520	1643.08	155.462	3.39716	6.39776e-32	7.31482e-31	-	4	4414	Chaperone DnaJ-domain superfamily protein [Source:UniProtKB/TrEMBL;Acc:F4JPR4]	-
AT2G32320	616.578	227.211	1.43263	6.44731e-32	7.36806e-31	THG2	2	2413	tRNA(His) guanylyltransferase 2 [Source:UniProtKB/Swiss-Prot;Acc:F4ISV6]	-
AT4G32920	894.687	405.764	1.13509	6.49357e-32	7.41749e-31	-	4	5474	Glycine-rich protein [Source:UniProtKB/TrEMBL;Acc:F4JV81]	-
AT4G13550	294.405	89.369	1.70581	6.85111e-32	7.82187e-31	-	4	3161	triglyceride lipases;triglyceride lipases [Source:TAIR;Acc:AT4G13550]	Lipase_3
AT3G15950	163.42	39.4799	2.04688	6.85391e-32	7.82187e-31	NAI2	3	2604	TSA1-like protein [Source:UniProtKB/Swiss-Prot;Acc:Q9LSB4]	-
AT5G47000	197.368	57.0744	1.77804	6.92947e-32	7.90446e-31	PER65	5	1531	Peroxidase 65 [Source:UniProtKB/Swiss-Prot;Acc:Q9FJR1]	-
AT4G05040	447.249	179.139	1.32179	7.34268e-32	8.37194e-31	-	4	2962	AT4G05040 protein [Source:UniProtKB/TrEMBL;Acc:Q94A85]	-
AT4G38060	737.658	304.91	1.27279	7.38191e-32	8.41279e-31	-	4	2268	AT4G38060 protein [Source:UniProtKB/TrEMBL;Acc:Q93VQ7]	-
AT5G14550	475.319	191.175	1.30589	8.75472e-32	9.94979e-31	-	5	2012	At5g14550 [Source:UniProtKB/TrEMBL;Acc:B6IDH4]	-
AT1G71110	309.218	120.284	1.3659	8.95011e-32	1.01578e-30	-	1	2282	unknown protein; FUNCTIONS IN: molecular_function unknown; INVOLVED IN: biological_process unknown; LOCATED IN: endomembrane system; BEST Arabidopsis thaliana protein match is: unknown protein (TAIR:AT2G12400.1); Ha. [Source:TAIR;Acc:AT1G71110]	-
AT5G24280	1796.1	468.937	1.9336	9.54243e-32	1.08102e-30	GMI1	5	5146	Structural maintenance of chromosomes flexible hinge domain-containing protein GMI1 [Source:UniProtKB/Swiss-Prot;Acc:F4KFS5]	-
AT1G20490	167.197	30.9282	2.40171	1.01117e-31	1.14499e-30	-	1	2212	AMP-dependent synthetase and ligase family protein [Source:TAIR;Acc:AT1G20490]	AMP-binding
AT1G05820	128.615	18.4123	2.82773	1.03116e-31	1.16709e-30	SPPL5	1	2723	Signal peptide peptidase-like 5 [Source:UniProtKB/Swiss-Prot;Acc:Q9MA44]	-
AT1G04030	391.98	144.664	1.42745	1.03373e-31	1.16946e-30	-	1	1854	unknown protein; BEST Arabidopsis thaliana protein match is: unknown protein (TAIR:AT5G44040.1); Ha. [Source:TAIR;Acc:AT1G04030]	-
AT1G79880	567.924	221.046	1.358	1.04398e-31	1.17998e-30	LA2	1	1577	La protein 2 [Source:UniProtKB/Swiss-Prot;Acc:Q0V7U7]	RRM_1
AT3G14660	659.312	316.181	1.06069	1.05227e-31	1.1888e-30	CYP72A13	3	2593	Cytochrome P450 72A13 [Source:UniProtKB/Swiss-Prot;Acc:Q9LUC8]	p450
AT3G17700	337.08	112.351	1.57159	1.16455e-31	1.31446e-30	CNGC20	3	2896	Probable cyclic nucleotide-gated ion channel 20, chloroplastic [Source:UniProtKB/Swiss-Prot;Acc:Q9LD37]	Ion_trans
AT1G10910	1066.14	244.741	2.11691	1.21676e-31	1.37088e-30	-	1	2430	Pentatricopeptide repeat-containing protein At1g10910, chloroplastic [Source:UniProtKB/Swiss-Prot;Acc:Q0WVV0]	-
AT2G34710	2071.19	733.697	1.49515	1.21919e-31	1.37299e-30	ATHB-14	2	3146	Homeobox-leucine zipper protein ATHB-14 [Source:UniProtKB/Swiss-Prot;Acc:O04291]	START
AT3G05610	299.362	36.3946	3.01541	1.25407e-31	1.41099e-30	PME21	3	2557	Probable pectinesterase/pectinesterase inhibitor 21 [Source:UniProtKB/Swiss-Prot;Acc:Q8GX86]	-
AT2G29910	359.96	156.469	1.19713	1.30946e-31	1.47263e-30	-	2	2095	F-box/RNI-like superfamily protein [Source:TAIR;Acc:AT2G29910]	-
AT1G11280	1167.5	527.027	1.14929	1.36216e-31	1.53121e-30	-	1	2915	S-locus lectin protein kinase family protein [Source:TAIR;Acc:AT1G11280]	Pkinase_Tyr
AT5G61300	252.899	71.7539	1.80752	1.38508e-31	1.55626e-30	-	5	2368	Gb [Source:UniProtKB/TrEMBL;Acc:Q9FLK3]	-
AT4G13495	189.17	35.0301	2.422	1.40576e-31	1.57878e-30	-	4	1042	other RNA [Source:TAIR;Acc:AT4G13495]	-
AT5G48600	1048.76	260.665	2.00121	1.42405e-31	1.59859e-30	ATSMC3	5	4166	Structural maintenance of chromosomes protein [Source:UniProtKB/TrEMBL;Acc:F4K1S1]	SMC_N
AT1G78010	450.95	204.186	1.14731	1.47887e-31	1.65863e-30	-	1	1993	At1g78010 [Source:UniProtKB/TrEMBL;Acc:Q66GQ1]	-
AT1G33615	118.32	7.21835	4.05737	1.49316e-31	1.67314e-30	-	1	3585	other RNA [Source:TAIR;Acc:AT1G33615]	-
AT4G12750	531.334	197.019	1.41931	1.49896e-31	1.67888e-30	-	4	3976	Homeodomain-like transcriptional regulator [Source:TAIR;Acc:AT4G12750]	Homeobox
AT2G02765	478.571	82.6665	2.54566	1.58676e-31	1.7756e-30	-	2	1429	L-aminoadipate-semialdehyde dehydrogenase-phosphopantetheinyl transferase [Source:UniProtKB/TrEMBL;Acc:A0A1P8B2C9]	ACPS
AT2G46980	415.475	152.357	1.44373	1.6315e-31	1.82237e-30	ASY3	2	3872	Meiosis-specific protein ASY3 [Source:UniProtKB/Swiss-Prot;Acc:Q0WR66]	-
AT5G18840	222.304	58.4548	1.9199	1.63813e-31	1.82895e-30	-	5	1890	Sugar transporter ERD6-like 16 [Source:UniProtKB/Swiss-Prot;Acc:Q8LBI9]	Sugar_tr
AT5G47540	522.799	208.348	1.33145	1.83788e-31	2.05104e-30	-	5	1698	At5g47540 [Source:UniProtKB/TrEMBL;Acc:B3LFB8]	-
AT2G39340	1861.08	396.057	2.22969	1.89942e-31	2.11685e-30	SAC3A	2	3740	SAC3 family protein A [Source:UniProtKB/Swiss-Prot;Acc:F4IUY8]	SAC3_GANP
AT5G58720	1620.9	612.335	1.4003	2.22427e-31	2.47331e-30	PIPC	5	2256	SMR domain-containing protein At5g58720 [Source:UniProtKB/Swiss-Prot;Acc:O65573]	-
AT1G55690	2015.37	590.266	1.76847	2.26014e-31	2.51207e-30	SFH13	1	3232	Phosphatidylinositol/phosphatidylcholine transfer protein SFH13 [Source:UniProtKB/Swiss-Prot;Acc:Q501H5]	-
AT2G31040	538.017	258.371	1.05626	2.32594e-31	2.58172e-30	CGL160	2	1699	Protein CONSERVED ONLY IN THE GREEN LINEAGE 160, chloroplastic [Source:UniProtKB/Swiss-Prot;Acc:O82279]	-
AT5G35405	118.274	5.29263	4.51665	2.97148e-31	3.28792e-30	-	5	583	ECA1 gametogenesis family protein (DUF784) [Source:UniProtKB/TrEMBL;Acc:Q9LKB8]	-
AT5G22796	115.143	5.61539	4.31635	3.6782e-31	4.06262e-30	-	5	598	-	-
AT5G18403	149.791	3.65325	5.53197	3.69396e-31	4.0782e-30	-	5	334	Defensin-like protein 218 [Source:UniProtKB/Swiss-Prot;Acc:Q2V370]	-
AT4G38230	281.822	32.104	3.10384	3.80541e-31	4.1975e-30	CPK26	4	2181	Calcium-dependent protein kinase 26 [Source:UniProtKB/TrEMBL;Acc:F4JTL3]	Pkinase
AT5G22690	220.238	59.711	1.8791	4.0248e-31	4.43356e-30	-	5	3808	Disease resistance protein (TIR-NBS-LRR class) family [Source:TAIR;Acc:AT5G22690]	TIR
AT1G26260	279.42	90.3925	1.61582	5.14096e-31	5.64798e-30	BHLH76	1	2011	Transcription factor bHLH76 [Source:UniProtKB/Swiss-Prot;Acc:Q9C670]	HLH
AT1G04470	114.157	11.312	3.34111	5.47643e-31	6.01386e-30	-	1	3611	F19P19.6 protein [Source:UniProtKB/TrEMBL;Acc:P93812]	-
AT5G62170	551.111	210.441	1.38716	5.52161e-31	6.06078e-30	-	5	2744	unknown protein; BEST Arabidopsis thaliana protein match is: unknown protein (TAIR:AT5G51850.1); Ha. [Source:TAIR;Acc:AT5G62170]	-
AT3G16750	187.974	50.9818	1.89196	5.83574e-31	6.39422e-30	-	3	1317	Putative uncharacterized protein [Source:UniProtKB/TrEMBL;Acc:Q9LUQ8]	-
AT5G57110	2923.64	1040.42	1.48957	6.01753e-31	6.59049e-30	ACA8	5	3968	Calcium-transporting ATPase [Source:UniProtKB/TrEMBL;Acc:Q0WV19]	Cation_ATPase_C
AT5G07660	663.06	102.646	2.68092	6.62225e-31	7.23356e-30	SMC6A	5	3457	Structural maintenance of chromosomes protein 6A [Source:UniProtKB/Swiss-Prot;Acc:Q9FLR5]	SMC_N
AT1G04950	876.454	369.713	1.23791	7.31118e-31	7.97551e-30	TAF6	1	2363	TAFII59 [Source:UniProtKB/TrEMBL;Acc:A0A178W741]	-
AT3G19180	872.133	387.491	1.1671	7.35695e-31	8.0219e-30	CDP1	3	3079	Plastid division protein CDP1, chloroplastic [Source:UniProtKB/Swiss-Prot;Acc:Q8VY16]	-
AT2G27340	504.222	190.511	1.4139	7.60837e-31	8.28508e-30	-	2	1661	At2g27340 [Source:UniProtKB/TrEMBL;Acc:Q6NLZ3]	-
AT1G05900	234.536	83.3074	1.49077	7.99269e-31	8.69975e-30	NTH2	1	1579	Endonuclease III homolog [Source:UniProtKB/TrEMBL;Acc:A0A178W393]	HhH-GPD
AT3G57410	2122.38	887.92	1.25599	8.09629e-31	8.80088e-30	VLN3	3	5061	Villin-3 [Source:UniProtKB/Swiss-Prot;Acc:O81645]	-
AT4G39560	294.447	99.3273	1.55558	8.18294e-31	8.89116e-30	-	4	1627	F-box/kelch-repeat protein At4g39560 [Source:UniProtKB/Swiss-Prot;Acc:Q67XN8]	Kelch_1
AT3G10360	778.904	303.962	1.35156	8.39235e-31	9.11469e-30	APUM4	3	3757	Pumilio homolog 4 [Source:UniProtKB/Swiss-Prot;Acc:Q9SS47]	PUF
AT1G19660	1648.19	697.306	1.24334	8.64601e-31	9.38607e-30	BBD2	1	1852	Bifunctional nuclease 2 [Source:UniProtKB/Swiss-Prot;Acc:Q93VH2]	UVR
AT2G44280	251.947	84.9912	1.55635	8.69733e-31	9.43763e-30	-	2	2543	AT3g60070/T2O9_50 [Source:UniProtKB/TrEMBL;Acc:Q8L7S2]	-
AT5G04810	1535.56	413.424	1.88923	8.74403e-31	9.47583e-30	PPR4	5	3242	Pentatricopeptide repeat-containing protein At5g04810, chloroplastic [Source:UniProtKB/Swiss-Prot;Acc:Q0WMY5]	RRM_1
AT2G13965	158.155	30.7963	2.33485	9.07552e-31	9.82645e-30	-	2	348	Transmembrane protein [Source:UniProtKB/TrEMBL;Acc:A0A1P8AXY6]	-
AT3G10310	485.143	165.426	1.54237	1.02371e-30	1.10648e-29	-	3	3374	P-loop nucleoside triphosphate hydrolases superfamily protein with CH (Calponin Homology) domain-containing protein [Source:UniProtKB/TrEMBL;Acc:A0A1I9LMT1]	Kinesin
AT1G34315	137.497	3.53673	5.27748	1.13591e-30	1.22667e-29	-	1	819	unknown protein; FUNCTIONS IN: molecular_function unknown; INVOLVED IN: biological_process unknown; LOCATED IN: endomembrane system; BEST Arabidopsis thaliana protein match is: unknown protein (TAIR:AT3G31400.1); Ha. [Source:TAIR;Acc:AT1G34315]	-
AT2G47830	406.376	155.904	1.3753	1.15494e-30	1.24596e-29	MTPC1	2	1817	Metal tolerance protein C1 [Source:UniProtKB/Swiss-Prot;Acc:Q8L725]	-
AT5G12000	163.893	2.8128	5.82076	1.15529e-30	1.24596e-29	-	5	2696	Kinase with adenine nucleotide alpha hydrolases-like domain-containing protein [Source:UniProtKB/TrEMBL;Acc:Q0WVJ0]	Pkinase_Tyr
AT4G25290	874.934	249.56	1.80229	1.20888e-30	1.30263e-29	-	4	2381	DNA photolyase [Source:UniProtKB/TrEMBL;Acc:F4JSJ6]	Abhydrolase_1
AT2G38580	594.702	197.653	1.57806	1.3111e-30	1.41155e-29	-	2	1915	Mitochondrial ATP synthase D chain-related protein [Source:UniProtKB/TrEMBL;Acc:Q682E1]	-
AT5G17270	799.399	302.772	1.39258	1.31772e-30	1.41805e-29	-	5	3381	Protein prenylyltransferase superfamily protein [Source:UniProtKB/TrEMBL;Acc:Q9FFI4]	-
AT4G36610	118.068	12.8246	3.25569	1.3855e-30	1.49035e-29	-	4	1365	Alpha/beta-Hydrolases superfamily protein [Source:UniProtKB/TrEMBL;Acc:O23220]	Abhydrolase_1
AT1G30755	186.223	27.3491	2.7428	1.38746e-30	1.49181e-29	-	1	3256	Elongation factor G, putative (DUF668) [Source:UniProtKB/TrEMBL;Acc:Q8L5Y3]	-
AT5G63370	2063.78	719.573	1.51774	1.39173e-30	1.49551e-29	CDKG1	5	3461	Cyclin-dependent kinase G1 [Source:UniProtKB/Swiss-Prot;Acc:Q9FGW5]	Pkinase
AT1G54730	846.408	371.538	1.18795	1.76331e-30	1.88689e-29	-	1	3540	Sugar transporter ERD6-like 5 [Source:UniProtKB/Swiss-Prot;Acc:Q3ECP7]	Sugar_tr
AT1G23360	410.299	174.048	1.24097	1.82366e-30	1.95063e-29	MENG	1	1428	2-phytyl-1,4-beta-naphthoquinone methyltransferase, chloroplastic [Source:UniProtKB/Swiss-Prot;Acc:Q3ED65]	-
AT1G07745	202.564	32.1321	2.62248	1.86811e-30	1.99645e-29	RAD51D	1	1669	DNA repair protein RAD51 homolog 4 [Source:UniProtKB/Swiss-Prot;Acc:Q9LQQ2]	-
AT5G18525	831.857	219.565	1.91343	1.96352e-30	2.0975e-29	GFS12	5	5280	Protein GFS12 [Source:UniProtKB/Swiss-Prot;Acc:F4JY12]	Beach
novel.46	228.511	47.3178	2.23801	1.98941e-30	2.12389e-29	-	1	2221	- && Q9SH60.2 RecName: Full=Pentatricopeptide repeat-containing protein At1g64100 && -	-
AT1G53510	868.589	337.684	1.35768	1.98994e-30	2.12389e-29	MPK18	1	2710	Mitogen-activated protein kinase 18 [Source:UniProtKB/Swiss-Prot;Acc:Q9C5C0]	Pkinase
AT5G06440	454.923	192.399	1.25152	2.07933e-30	2.21738e-29	-	5	2580	BEST Arabidopsis thaliana protein match is: Polyketide cyclase/dehydrase and lipid transport superfamily protein (TAIR:AT3G11720.3); Ha. [Source:TAIR;Acc:AT5G06440]	-
AT2G20290	491.126	149.044	1.7103	2.15076e-30	2.29257e-29	XI-G	2	5133	Myosin-13 [Source:UniProtKB/Swiss-Prot;Acc:F4IUG9]	Myosin_head
AT3G54925	130.631	6.07824	4.48624	2.27632e-30	2.42431e-29	-	3	546	Plant self-incompatibility protein S1 family [Source:UniProtKB/TrEMBL;Acc:B3H7I0]	Self-incomp_S1
AT5G15270	1287.38	525.614	1.28951	2.46039e-30	2.6136e-29	-	5	3043	RNA-binding KH domain-containing protein [Source:UniProtKB/TrEMBL;Acc:Q0WNX3]	KH_1
AT3G53930	372.76	159.961	1.22155	2.46522e-30	2.6176e-29	-	3	3255	Protein kinase superfamily protein [Source:UniProtKB/TrEMBL;Acc:A8MR56]	Pkinase
AT2G20815	129.137	18.615	2.74995	2.46874e-30	2.62021e-29	QWRF3	2	2417	Family of unknown function (DUF566) [Source:TAIR;Acc:AT2G20815]	-
AT5G49840	727.233	324.938	1.15547	2.47266e-30	2.62325e-29	-	5	3036	ATP-dependent Clp protease [Source:TAIR;Acc:AT5G49840]	-
AT3G17225	250.516	55.4483	2.15734	2.73364e-30	2.89391e-29	-	3	848	Plant invertase/pectin methylesterase inhibitor superfamily protein [Source:UniProtKB/TrEMBL;Acc:Q9LUV0]	-
AT3G02940	308.495	102.51	1.59513	3.06241e-30	3.23503e-29	MYB107	3	1450	At3g02940 [Source:UniProtKB/TrEMBL;Acc:Q9LDI5]	Myb_DNA-binding
AT3G02370	179.312	29.711	2.56475	3.08993e-30	3.26271e-29	-	3	1666	tRNA-splicing endonuclease subunit [Source:UniProtKB/TrEMBL;Acc:F4J8D6]	-
AT1G27752	639.502	277.853	1.1972	3.12485e-30	3.29817e-29	-	1	3083	Ubiquitin system component Cue protein [Source:UniProtKB/TrEMBL;Acc:B3H6L4]	CUE
AT3G16320	171.351	44.4472	1.93983	3.41006e-30	3.59153e-29	CDC27a	3	2763	Tetratricopeptide repeat (TPR)-like superfamily protein [Source:TAIR;Acc:AT3G16320]	TPR_1
AT3G10900	110.932	11.5964	3.25974	3.59992e-30	3.78827e-29	MAN4	3	1227	Putative mannan endo-1,4-beta-mannosidase 4 [Source:UniProtKB/Swiss-Prot;Acc:Q9SG95]	-
AT2G26980	616.788	207.464	1.57671	3.63089e-30	3.81923e-29	CIPK3	2	3224	Non-specific serine/threonine protein kinase [Source:UniProtKB/TrEMBL;Acc:F4IVM7]	Pkinase
AT3G15605	115.54	12.7552	3.22734	3.92865e-30	4.12717e-29	-	3	2005	Nucleic acid binding protein [Source:UniProtKB/TrEMBL;Acc:F4J000]	-
AT1G45221	129.931	4.29427	4.95551	4.18232e-30	4.38807e-29	-	1	565	Bifunctional inhibitor/lipid-transfer protein/seed storage 2S albumin superfamily protein [Source:UniProtKB/TrEMBL;Acc:A8MQF4]	-
AT5G49470	355.612	107.569	1.7231	4.29764e-30	4.50523e-29	-	5	3741	PAS domain-containing protein tyrosine kinase family protein [Source:UniProtKB/TrEMBL;Acc:F4K645]	Pkinase_Tyr
AT1G26330	217.07	66.1837	1.70642	4.7853e-30	5.01007e-29	-	1	3946	DNA binding protein [Source:UniProtKB/TrEMBL;Acc:F4IE60]	-
AT5G63320	552.659	190.033	1.53557	5.17066e-30	5.40895e-29	GTE10	5	4556	NPX1 [Source:UniProtKB/TrEMBL;Acc:A0A178UIE5]	Bromodomain
AT2G26850	122.48	11.1347	3.47701	5.44156e-30	5.68512e-29	-	2	1890	F-box protein At2g26850 [Source:UniProtKB/Swiss-Prot;Acc:Q6NLB1]	F-box
AT4G21710	2717.5	1177.34	1.20491	6.455e-30	6.71836e-29	NRPB2	4	4052	DNA-directed RNA polymerase II subunit 2 [Source:UniProtKB/Swiss-Prot;Acc:P38420]	RNA_pol_Rpb2_6
AT3G16840	1571.21	394.337	1.99038	6.69944e-30	6.96691e-29	-	3	2911	P-loop containing nucleoside triphosphate hydrolases superfamily protein [Source:UniProtKB/TrEMBL;Acc:A0A178VJW0]	DEAD
AT2G32295	308.944	101.092	1.59342	7.02179e-30	7.28986e-29	-	2	2284	EXS (ERD1/XPR1/SYG1) family protein [Source:UniProtKB/TrEMBL;Acc:F4ISV2]	-
AT5G47020	2207.1	659.275	1.741	7.1776e-30	7.44849e-29	-	5	4975	unknown protein; FUNCTIONS IN: molecular_function unknown; INVOLVED IN: biological_process unknown; LOCATED IN: endomembrane system; EXPRESSED IN: 23 plant structures; EXPRESSED DURING: 13 growth stages; BEST Arabidopsis thaliana protein match is: u /.../ protein (TAIR:AT5G11700.2); Ha. [Source:TAIR;Acc:AT5G47020]	-
AT2G45460	527.328	145.229	1.85056	7.21602e-30	7.48522e-29	-	2	3228	SMAD/FHA domain-containing protein [Source:UniProtKB/TrEMBL;Acc:F4IG63]	FHA
AT3G50670	2801.83	1250.88	1.16153	7.95272e-30	8.24249e-29	RNU1	3	2701	U1SNRNP [Source:UniProtKB/TrEMBL;Acc:A0A178VDW4]	RRM_1
AT5G41130	206.967	58.3144	1.82866	8.19581e-30	8.49087e-29	-	5	2707	Esterase/lipase/thioesterase family protein [Source:TAIR;Acc:AT5G41130]	-
AT3G01100	622.54	244.773	1.33899	8.33186e-30	8.62459e-29	HYP1	3	3224	hypothetical protein 1 [Source:TAIR;Acc:AT3G01100]	-
AT2G33060	326.15	121.116	1.41953	8.47209e-30	8.76608e-29	AtRLP27	2	2779	Receptor like protein 27 [Source:UniProtKB/Swiss-Prot;Acc:F4IUU1]	-
AT5G47860	302.872	113.533	1.42917	8.77009e-30	9.06303e-29	-	5	1545	AT5g47860/MCA23_20 [Source:UniProtKB/TrEMBL;Acc:Q9FIJ5]	-
AT4G27860	1361.63	377.134	1.84896	9.86941e-30	1.01778e-28	-	4	2368	vacuolar iron transporter (VIT) family protein [Source:TAIR;Acc:AT4G27860]	-
AT4G16990	605.893	194.949	1.62663	9.96036e-30	1.02673e-28	RLM3	4	4114	disease resistance protein (TIR-NBS class), putative [Source:TAIR;Acc:AT4G16990]	NB-ARC
AT5G44030	409.911	166.389	1.28866	1.02332e-29	1.05441e-28	CESA4	5	3771	cellulose synthase A4 [Source:TAIR;Acc:AT5G44030]	-
AT2G12465	133.151	17.0396	2.92274	1.0888e-29	1.12048e-28	LCR50	2	370	Putative defensin-like protein 111 [Source:UniProtKB/Swiss-Prot;Acc:P82765]	-
AT3G55252	140.492	3.44509	5.30925	1.18174e-29	1.2126e-28	-	3	595	Plant self-incompatibility protein S1 family [Source:UniProtKB/TrEMBL;Acc:Q1G395]	Self-incomp_S1
AT4G35010	644.754	169.482	1.92483	1.1923e-29	1.22292e-28	BGAL11	4	2990	Beta-galactosidase 11 [Source:UniProtKB/Swiss-Prot;Acc:Q9SCV1]	-
AT1G02080	4104.05	969.903	2.07978	1.24985e-29	1.28142e-28	-	1	7649	Transcription regulator [Source:UniProtKB/TrEMBL;Acc:F4HVV6]	Not1
AT3G49410	106.601	9.47677	3.42526	1.25824e-29	1.28949e-28	-	3	2403	Transcription factor IIIC, subunit 5 [Source:UniProtKB/TrEMBL;Acc:F4IXX4]	-
AT4G09465	116.307	14.7339	2.95	1.35072e-29	1.38083e-28	-	4	465	Carbohydrate-binding X8 domain superfamily protein [Source:UniProtKB/TrEMBL;Acc:Q1G3J2]	-
AT2G41760	496.933	198.995	1.31878	1.43028e-29	1.46095e-28	NTAQ1	2	1957	Protein N-terminal glutamine amidohydrolase [Source:UniProtKB/Swiss-Prot;Acc:O22944]	-
AT5G11940	142.724	3.047	5.61904	1.43293e-29	1.46306e-28	SBT3.11	5	2289	Subtilisin-like protease SBT3.11 [Source:UniProtKB/Swiss-Prot;Acc:Q1PDX5]	Peptidase_S8
AT4G08310	1213.54	399.875	1.5974	1.62243e-29	1.65381e-28	-	4	1944	DNA ligase [Source:UniProtKB/TrEMBL;Acc:Q9SUE9]	-
AT5G42232	270.498	90.4395	1.5863	1.70053e-29	1.73128e-28	-	5	398	Defensin-like protein 115 [Source:UniProtKB/Swiss-Prot;Acc:Q2V321]	-
AT4G16660	3961.08	1306.05	1.59892	1.76792e-29	1.79841e-28	-	4	3405	heat shock protein 70 (Hsp 70) family protein [Source:TAIR;Acc:AT4G16660]	HSP70
AT5G20320	1277.69	357.017	1.83634	1.8166e-29	1.8464e-28	DCL4	5	5738	Dicer-like protein 4 [Source:UniProtKB/Swiss-Prot;Acc:P84634]	DUF283
AT3G04450	159.353	36.0383	2.14089	1.9504e-29	1.97914e-28	PHL13	3	2896	Myb family transcription factor PHL13 [Source:UniProtKB/Swiss-Prot;Acc:F4J3P7]	Myb_DNA-binding
AT5G12280	125.116	21.3365	2.55631	1.96714e-29	1.99449e-28	-	5	1873	SWAP (Suppressor-of-White-APricot)/surp RNA-binding domain-containing protein [Source:UniProtKB/TrEMBL;Acc:Q94CL4]	-
AT3G10030	993.509	482.126	1.04001	1.9831e-29	2.00902e-28	-	3	2359	AT3g10030/T22K18_15 [Source:UniProtKB/TrEMBL;Acc:Q94JR1]	AA_kinase
AT3G14470	118.939	17.113	2.77751	2.02782e-29	2.05349e-28	RPPL1	3	3781	Putative disease resistance RPP13-like protein 1 [Source:UniProtKB/Swiss-Prot;Acc:Q9LRR4]	NB-ARC
AT2G21710	239.774	88.816	1.43808	2.13111e-29	2.15721e-28	MTERF2	2	2237	Transcription termination factor MTERF2, chloroplastic [Source:UniProtKB/Swiss-Prot;Acc:F4IHL3]	-
AT1G54350	562.151	273.649	1.03524	2.15925e-29	2.18479e-28	ABCC2	1	2338	ABC transporter D family member 2, chloroplastic [Source:UniProtKB/Swiss-Prot;Acc:Q6NLC1]	ABC_tran
AT5G24740	1547.93	250.729	2.62209	2.2798e-29	2.30488e-28	-	5	11260	Protein of unknown function (DUF1162) [Source:TAIR;Acc:AT5G24740]	-
AT1G34150	384.378	158.076	1.27805	2.32423e-29	2.34884e-28	-	1	1807	tRNA pseudouridine synthase [Source:UniProtKB/TrEMBL;Acc:Q9C5K6]	-
novel.10	154.963	13.275	3.47994	2.5339e-29	2.5576e-28	-	1	416	- && - && -	-
AT2G07680	202.397	40.5752	2.29939	2.62852e-29	2.65201e-28	ATMRP11	2	4870	multidrug resistance-associated protein 11 [Source:TAIR;Acc:AT2G07680]	ABC_membrane
AT5G21150	15079.6	3725.11	2.01687	2.89704e-29	2.91817e-28	AGO9	5	3075	Protein argonaute 9 [Source:UniProtKB/Swiss-Prot;Acc:Q84VQ0]	Piwi
AT2G32170	844.894	387.022	1.12627	3.63484e-29	3.65688e-28	-	2	2626	S-adenosyl-L-methionine-dependent methyltransferases superfamily protein [Source:UniProtKB/TrEMBL;Acc:F4IST2]	-
AT1G07650	2301.34	761.612	1.59317	4.25288e-29	4.27172e-28	-	1	4120	Leucine-rich repeat transmembrane protein kinase [Source:UniProtKB/TrEMBL;Acc:F4HSE1]	Pkinase_Tyr
AT5G51810	784.745	370.167	1.07821	4.39148e-29	4.40914e-28	GA20OX2	5	1560	Gibberellin 20 oxidase 2 [Source:UniProtKB/Swiss-Prot;Acc:Q39111]	2OG-FeII_Oxy
AT2G33540	919.047	187.91	2.28709	4.79842e-29	4.81381e-28	CPL3	2	4926	RNA polymerase II C-terminal domain phosphatase-like 3 [Source:UniProtKB/Swiss-Prot;Acc:Q8LL04]	NIF
AT3G27260	1855.11	477.615	1.95456	4.93936e-29	4.95318e-28	GTE8	3	3372	Global transcription factor group E8 [Source:UniProtKB/TrEMBL;Acc:A0A1I9LS77]	Bromodomain
AT2G45840	160.769	36.2591	2.1807	5.1867e-29	5.1949e-28	-	2	2004	Glycosyltransferase [Source:UniProtKB/TrEMBL;Acc:F4IH52]	-
AT1G62914	169.953	36.1987	2.24202	5.21229e-29	5.21619e-28	-	1	1848	Pentatricopeptide repeat-containing protein At1g62914, mitochondrial [Source:UniProtKB/Swiss-Prot;Acc:Q9LQ15]	-
AT1G16705	712.825	303.272	1.22973	5.88251e-29	5.87515e-28	-	1	1067	p300/CBP acetyltransferase-related protein-like protein [Source:UniProtKB/TrEMBL;Acc:F4I4I6]	-
AT3G51830	567.78	224.087	1.33192	5.93275e-29	5.92293e-28	SAC8	3	2214	Phosphoinositide phosphatase SAC8 [Source:UniProtKB/Swiss-Prot;Acc:Q96328]	-
AT5G18130	192.202	53.6083	1.8362	6.64145e-29	6.62243e-28	-	5	2176	Gb [Source:UniProtKB/TrEMBL;Acc:Q9FK57]	-
AT1G72650	1057.65	376.733	1.48506	6.67364e-29	6.65184e-28	TRFL6	1	2501	TRF-like 6 [Source:UniProtKB/TrEMBL;Acc:F4IDF1]	Myb_DNA-binding
AT4G37030	121.576	19.8046	2.5714	6.92751e-29	6.90211e-28	-	4	2354	Membrane protein [Source:UniProtKB/TrEMBL;Acc:Q58FU6]	-
AT3G04540	160.679	2.77645	5.95769	7.04624e-29	7.01192e-28	-	3	372	Defensin-like protein 44 [Source:UniProtKB/Swiss-Prot;Acc:Q9M833]	-
AT5G10650	274.362	103.843	1.40336	7.40798e-29	7.36301e-28	-	5	2987	At5g10650 [Source:UniProtKB/TrEMBL;Acc:Q5XEP8]	-
AT1G53250	206.078	55.4593	1.90092	7.85293e-29	7.79584e-28	-	1	1352	unknown protein; BEST Arabidopsis thaliana protein match is: unknown protein (TAIR:AT1G53800.1); Ha. [Source:TAIR;Acc:AT1G53250]	-
AT4G16900	592.896	95.0314	2.62931	7.90872e-29	7.84808e-28	-	4	3767	Disease resistance protein (TIR-NBS-LRR class) family [Source:UniProtKB/TrEMBL;Acc:F4JNB2]	TIR
AT5G65685	620.631	283.314	1.13944	7.93102e-29	7.86705e-28	-	5	3201	UDP-Glycosyltransferase superfamily protein [Source:TAIR;Acc:AT5G65685]	-
AT5G26610	766.394	206.48	1.88534	7.97464e-29	7.90714e-28	-	5	1450	At5g26610 [Source:UniProtKB/TrEMBL;Acc:Q147M4]	G-patch
AT4G15475	663.773	310.465	1.08834	8.03625e-29	7.96185e-28	FBL4	4	2116	F-box/LRR-repeat protein 4 [Source:UniProtKB/Swiss-Prot;Acc:Q9C5D2]	-
AT5G63063	267.152	27.6268	3.2865	8.68721e-29	8.59988e-28	-	5	569	Plant thionin family protein [Source:TAIR;Acc:AT5G63063]	-
AT3G49645	250.734	78.4605	1.66104	8.73882e-29	8.64405e-28	-	3	1350	FAD-binding protein [Source:UniProtKB/TrEMBL;Acc:A0A1I9LMB9]	-
AT3G48900	160.567	26.9421	2.54809	8.92196e-29	8.82168e-28	GEN2	3	2214	Flap endonuclease GEN-like 2 [Source:UniProtKB/Swiss-Prot;Acc:Q9M2Z3]	XPG_I
AT5G41020	462.853	176.218	1.38627	8.94828e-29	8.84416e-28	-	5	1915	Gb [Source:UniProtKB/TrEMBL;Acc:Q9FLM7]	-
AT3G25840	2172.06	391.483	2.46991	9.05386e-29	8.94494e-28	-	3	3650	Protein kinase superfamily protein [Source:UniProtKB/TrEMBL;Acc:Q8RWN3]	Pkinase
AT3G19740	1015.87	382.25	1.40608	9.15793e-29	9.04414e-28	-	3	3492	P-loop containing nucleoside triphosphate hydrolases superfamily protein [Source:UniProtKB/TrEMBL;Acc:F4JCC9]	AAA
AT1G74580	319.179	54.2343	2.53745	9.17489e-29	9.05728e-28	-	1	3168	Putative pentatricopeptide repeat-containing protein At1g74580 [Source:UniProtKB/Swiss-Prot;Acc:Q9CA58]	-
AT5G50830	119.083	10.2092	3.60529	9.3646e-29	9.24086e-28	-	5	1380	unknown protein; FUNCTIONS IN: molecular_function unknown; INVOLVED IN: N-terminal protein myristoylation; LOCATED IN: cellular_component unknown; EXPRESSED IN: 11 plant structures; EXPRESSED DURING: L mature pollen stage, M germinated pollen stage, /.../hesis, C globular stage, petal differentiation and expansion stage; Ha. [Source:TAIR;Acc:AT5G50830]	-
AT3G61160	274.15	86.0418	1.68158	1.06329e-28	1.04757e-27	-	3	2015	Protein kinase superfamily protein [Source:UniProtKB/TrEMBL;Acc:F4JE58]	Pkinase
AT1G56440	257.891	74.3586	1.79143	1.07526e-28	1.05893e-27	TPR5	1	1843	TPR5 [Source:UniProtKB/TrEMBL;Acc:A0A178WG02]	TPR_1
AT1G06265	116.113	10.6521	3.41292	1.0848e-28	1.06791e-27	-	1	2366	other RNA [Source:TAIR;Acc:AT1G06265]	-
AT2G14680	581.045	129.279	2.15559	1.14708e-28	1.12787e-27	MEE13	2	2710	Myosin heavy chain-like protein [Source:UniProtKB/TrEMBL;Acc:F4IGF6]	-
AT1G09060	1354.79	538.487	1.32853	1.16781e-28	1.14735e-27	-	1	3216	JmjC domain protein JMJ24 [Source:UniProtKB/TrEMBL;Acc:F4HZD1]	JmjC
AT2G07435	101.39	10.5782	3.25518	1.19198e-28	1.17015e-27	-	2	320	-	-
AT4G11800	1459.48	511.159	1.50989	1.32227e-28	1.29558e-27	-	4	3752	Calcineurin-like metallo-phosphoesterase superfamily protein [Source:UniProtKB/TrEMBL;Acc:F4JPS4]	Metallophos
AT4G24100	350.505	114.543	1.59596	1.32236e-28	1.29558e-27	-	4	2996	Protein kinase superfamily protein [Source:TAIR;Acc:AT4G24100]	Pkinase
AT4G35785	2028.28	821.045	1.30643	1.36934e-28	1.33963e-27	-	4	1526	At4g35785 [Source:UniProtKB/TrEMBL;Acc:Q494N5]	RRM_1
AT1G61210	675.357	211.932	1.66243	1.36949e-28	1.33963e-27	-	1	4446	Katanin p80 WD40 repeat-containing subunit B1 homolog [Source:UniProtKB/TrEMBL;Acc:F4HTH8]	WD40
AT5G42895	128.981	19.9803	2.69312	1.38727e-28	1.35648e-27	-	5	402	ECA1 gametogenesis related family protein [Source:UniProtKB/TrEMBL;Acc:A8MQ80]	-
AT5G02250	636.25	254.855	1.31049	1.45177e-28	1.41787e-27	RNR1	5	3086	Ribonuclease II, chloroplastic/mitochondrial [Source:UniProtKB/Swiss-Prot;Acc:Q6NQJ6]	RNB
AT1G09863	143.991	12.4517	3.5458	1.50597e-28	1.4679e-27	-	1	2320	-	-
AT1G28765	133.304	24.3492	2.42998	1.54889e-28	1.50915e-27	-	1	1031	-	-
AT1G03520	359.55	129.768	1.46172	1.62181e-28	1.57895e-27	-	1	2137	Core-2/I-branching beta-1,6-N-acetylglucosaminyltransferase family protein [Source:UniProtKB/TrEMBL;Acc:Q9LR71]	-
AT1G56553	143.567	2.47321	5.64028	1.66844e-28	1.6237e-27	-	1	375	Defensin-like protein 199 [Source:UniProtKB/Swiss-Prot;Acc:Q2V4G5]	-
AT5G23270	133.037	3.32542	5.36529	1.87545e-28	1.82159e-27	STP11	5	2017	Sugar transport protein 11 [Source:UniProtKB/Swiss-Prot;Acc:Q9FMX3]	Sugar_tr
AT5G19172	103.528	6.68963	3.93685	2.22118e-28	2.15146e-27	-	5	395	Defensin-like protein 49 [Source:UniProtKB/Swiss-Prot;Acc:Q2V366]	-
AT5G39790	447.326	177.126	1.32931	2.26843e-28	2.19379e-27	-	5	1466	5'-AMP-activated protein kinase-related [Source:TAIR;Acc:AT5G39790]	-
AT1G74590	138.63	28.8512	2.23511	2.28269e-28	2.20672e-27	GSTU10	1	1153	Glutathione S-transferase U10 [Source:UniProtKB/Swiss-Prot;Acc:Q9CA57]	GST_N
AT1G21730	456.283	140.525	1.68915	2.81294e-28	2.70768e-27	KIN7C	1	3342	Kinesin-like protein KIN-7C, mitochondrial [Source:UniProtKB/Swiss-Prot;Acc:Q8W5R6]	Kinesin
AT1G18270	1661.5	468.739	1.8226	2.98186e-28	2.86804e-27	-	1	4823	Ketose-bisphosphate aldolase class-II family protein [Source:UniProtKB/TrEMBL;Acc:F4IAP5]	F_bP_aldolase
AT3G48205	118.729	3.83449	5.05908	3.06333e-28	2.94526e-27	-	3	435	Plant thionin family protein [Source:UniProtKB/TrEMBL;Acc:A0A1I9LPN2]	-
AT1G52150	1345.85	556.097	1.27223	3.15044e-28	3.02547e-27	ATHB-15	1	3621	Homeobox-leucine zipper family protein / lipid-binding START domain-containing protein [Source:UniProtKB/TrEMBL;Acc:B3H4G8]	START
AT1G66540	233.491	62.9847	1.8753	3.21709e-28	3.08588e-27	-	1	2255	At1g66540 [Source:UniProtKB/TrEMBL;Acc:A2RVN3]	p450
AT5G04510	1122.2	428.452	1.3842	3.27696e-28	3.14209e-27	PDPK1	5	2285	3-phosphoinositide-dependent protein kinase 1 [Source:UniProtKB/Swiss-Prot;Acc:Q9XF67]	Pkinase
AT2G19280	311.34	112.13	1.473	3.38634e-28	3.24194e-27	-	2	3619	Pentatricopeptide repeat-containing protein At2g19280 [Source:UniProtKB/Swiss-Prot;Acc:Q6NKW7]	-
AT5G28290	525.837	223.561	1.22746	3.5011e-28	3.35051e-27	NEK3	5	2916	NEK3 [Source:UniProtKB/TrEMBL;Acc:A0A178UI68]	Pkinase
AT3G56300	194.002	34.4079	2.49062	3.58178e-28	3.4264e-27	-	3	1911	Cysteine--tRNA ligase 1, cytoplasmic [Source:UniProtKB/Swiss-Prot;Acc:Q9LYL3]	tRNA-synt_1e
AT2G25540	489.667	164.177	1.56862	3.92145e-28	3.74698e-27	CESA10	2	3591	Cellulose synthase (Fragment) [Source:UniProtKB/TrEMBL;Acc:W8QNX9]	-
AT3G61570	284.019	62.84	2.14987	4.08862e-28	3.89917e-27	GC3	3	2721	Golgin candidate 3 [Source:UniProtKB/Swiss-Prot;Acc:Q84WU4]	-
AT1G09710	309.4	88.5937	1.78742	4.15133e-28	3.95441e-27	-	1	2374	Homeodomain-like superfamily protein [Source:UniProtKB/TrEMBL;Acc:F4I129]	Myb_DNA-binding
AT1G19690	270.163	99.8371	1.44322	4.18221e-28	3.98228e-27	-	1	1349	At1g19690 [Source:UniProtKB/TrEMBL;Acc:Q147R9]	-
AT5G63080	313.128	99.0371	1.64299	4.20832e-28	4.0056e-27	-	5	1637	2-oxoglutarate (2OG) and Fe(II)-dependent oxygenase superfamily protein [Source:UniProtKB/TrEMBL;Acc:Q67ZB6]	-
AT5G60170	1442.93	433.196	1.73285	4.57003e-28	4.34152e-27	-	5	3509	RNA binding (RRM/RBD/RNP motifs) family protein [Source:UniProtKB/TrEMBL;Acc:F4JXH7]	RRM_1
AT2G28940	305.457	94.7942	1.70205	4.68334e-28	4.44747e-27	-	2	1598	At2g28940 [Source:UniProtKB/TrEMBL;Acc:O81064]	Pkinase_Tyr
AT1G62540	675.6	313.43	1.11063	4.74668e-28	4.50415e-27	FMO GS-OX2	1	1986	flavin-monooxygenase glucosinolate S-oxygenase 2 [Source:TAIR;Acc:AT1G62540]	FMO-like
AT1G58230	1240.03	362.97	1.76868	4.96021e-28	4.70317e-27	-	1	8387	binding [Source:TAIR;Acc:AT1G58230]	Beach
AT4G32700	490.363	125.56	1.9565	5.37674e-28	5.0942e-27	TEB	4	7232	Helicase and polymerase-containing protein TEBICHI [Source:UniProtKB/Swiss-Prot;Acc:Q588V7]	DEAD
AT3G26540	201.677	47.2333	2.08977	5.49555e-28	5.20477e-27	PCMP-A5	3	2111	Pentatricopeptide repeat-containing protein At3g26540 [Source:UniProtKB/Swiss-Prot;Acc:Q9LRV2]	PPR
AT1G03930	617.211	196.092	1.6457	5.56471e-28	5.26825e-27	CKL9	1	2419	Casein kinase 1-like protein 9 [Source:UniProtKB/Swiss-Prot;Acc:Q9ZWB3]	Pkinase
AT5G66540	857.054	299.85	1.50964	5.64251e-28	5.33578e-27	-	5	2017	U3 small nucleolar ribonucleoprotein protein MPP10 [Source:UniProtKB/TrEMBL;Acc:Q9FJY5]	-
AT3G10440	238.371	71.8169	1.72483	6.09562e-28	5.75545e-27	SGO1	3	2224	SHUGOSHIN 1 [Source:UniProtKB/Swiss-Prot;Acc:F4J3S1]	-
AT2G22300	876.171	352.514	1.30693	6.83919e-28	6.45259e-27	CAMTA3	2	4103	Calmodulin-binding transcription activator 3 [Source:UniProtKB/Swiss-Prot;Acc:Q8GSA7]	CG-1
AT2G40630	363.406	168.344	1.10833	7.46431e-28	7.02896e-27	-	2	3169	At2g40630/T2P4.2 [Source:UniProtKB/TrEMBL;Acc:Q94EI6]	-
AT5G52975	242.817	42.5331	2.54416	7.57933e-28	7.13456e-27	-	5	582	At5g05770 [Source:UniProtKB/TrEMBL;Acc:Q147K7]	-
AT5G46340	643.339	234.681	1.45275	7.99572e-28	7.52365e-27	RWA1	5	2522	RWA1 [Source:UniProtKB/TrEMBL;Acc:A0A178UNJ7]	-
AT4G30150	970.129	457.919	1.08007	9.27109e-28	8.70384e-27	-	4	6468	CONTAINS InterPro DOMAIN/s: Nucleolar 27S pre-rRNA processing, Urb2/Npa2 (InterPro:IPR018849); Ha. [Source:TAIR;Acc:AT4G30150]	-
AT4G32180	1463.5	701.773	1.05612	9.85104e-28	9.23778e-27	PANK2	4	3288	Pantothenate kinase 2 [Source:UniProtKB/TrEMBL;Acc:A0A178V4D0]	Fumble
AT1G03410	137.164	24.7187	2.50773	1.02305e-27	9.58273e-27	2A6	1	2652	1-aminocyclopropane-1-carboxylate oxidase homolog 5 [Source:UniProtKB/Swiss-Prot;Acc:Q43383]	2OG-FeII_Oxy
AT5G67340	240.143	51.7144	2.18248	1.02854e-27	9.63049e-27	PUB2	5	2902	U-box domain-containing protein 2 [Source:UniProtKB/Swiss-Prot;Acc:Q5XEZ8]	U-box
AT1G76050	451.421	179.668	1.3254	1.0606e-27	9.9232e-27	-	1	1674	RNA pseudouridine synthase 2, chloroplastic [Source:UniProtKB/Swiss-Prot;Acc:Q3ECD0]	S4
AT1G24160	1219.42	469.508	1.37213	1.06766e-27	9.98546e-27	-	1	2609	F3I6.9 protein [Source:UniProtKB/TrEMBL;Acc:O48683]	-
AT3G15354	1124.23	513.176	1.12907	1.07619e-27	1.00614e-26	SPA3	3	3544	Protein SPA1-RELATED 3 [Source:UniProtKB/Swiss-Prot;Acc:Q9LJR3]	WD40
AT3G02810	134.906	3.05173	5.39409	1.13754e-27	1.06229e-26	LIP2	3	2323	Receptor-like kinase LIP2 [Source:UniProtKB/Swiss-Prot;Acc:Q9M8S2]	Pkinase
AT2G17036	124.941	3.16866	5.27781	1.14054e-27	1.06469e-26	-	2	1455	F-box protein At2g17036 [Source:UniProtKB/Swiss-Prot;Acc:Q6DR20]	DUF295
AT3G14520	553.662	268.976	1.03673	1.18958e-27	1.10837e-26	TPS18	3	2124	Terpenoid synthase 18 [Source:UniProtKB/Swiss-Prot;Acc:Q9LUE2]	-
AT3G60330	105.898	9.12953	3.55188	1.23951e-27	1.15316e-26	AHA7	3	3447	Plasma membrane ATPase [Source:UniProtKB/TrEMBL;Acc:A0A1I9LS30]	E1-E2_ATPase
AT1G79350	1567.75	479.822	1.70468	1.24589e-27	1.15866e-26	FGT1	1	4347	Protein FORGETTER 1 [Source:UniProtKB/Swiss-Prot;Acc:F4IF36]	PHD
AT3G53540	771.613	327.715	1.22968	1.34355e-27	1.24714e-26	-	3	3888	Afadin [Source:UniProtKB/TrEMBL;Acc:A0A1I9LP47]	-
AT4G21530	483.247	222.813	1.11528	1.43478e-27	1.33032e-26	APC4	4	2670	Anaphase-promoting complex subunit 4 [Source:UniProtKB/Swiss-Prot;Acc:O65418]	-
AT2G02710	591.793	225.093	1.4053	1.47678e-27	1.36875e-26	TLP1	2	1986	Protein TWIN LOV 1 [Source:UniProtKB/Swiss-Prot;Acc:O64511]	-
AT1G79830	2985.38	676.377	2.14012	1.58545e-27	1.46672e-26	GC5	1	3826	Golgin Putative 5 [Source:UniProtKB/TrEMBL;Acc:F4HQB9]	-
AT4G26140	287.613	93.7121	1.63548	1.65007e-27	1.52593e-26	BGAL12	4	3171	beta-galactosidase 12 [Source:TAIR;Acc:AT4G26140]	-
AT4G21400	106.065	7.13111	3.84596	1.68856e-27	1.56094e-26	CRK28	4	3049	Cysteine-rich receptor-like protein kinase 28 [Source:UniProtKB/Swiss-Prot;Acc:O65405]	Pkinase_Tyr
AT5G65350	172.487	50.063	1.76727	1.72819e-27	1.59698e-26	HTR11	5	615	Histone H3-like 5 [Source:UniProtKB/Swiss-Prot;Acc:Q9FKQ3]	Histone
AT5G61380	1402.76	563.403	1.31245	1.9314e-27	1.78143e-26	APRR1	5	2808	Two-component response regulator-like APRR1 [Source:UniProtKB/Swiss-Prot;Acc:Q9LKL2]	Response_reg
AT2G04230	367.008	133.77	1.46609	1.93971e-27	1.78843e-26	-	2	1999	F-box/FBD/LRR-repeat protein At2g04230 [Source:UniProtKB/Swiss-Prot;Acc:Q6NKX3]	F-box
AT1G10540	1530.58	629.965	1.27834	1.98262e-27	1.82731e-26	NAT8	1	2139	Nucleobase-ascorbate transporter 8 [Source:UniProtKB/Swiss-Prot;Acc:Q8VZQ5]	-
AT3G22910	165.146	34.2414	2.25258	1.98732e-27	1.83096e-26	ACA13	3	3199	Putative calcium-transporting ATPase 13, plasma membrane-type [Source:UniProtKB/Swiss-Prot;Acc:Q9LIK7]	Cation_ATPase_C
AT2G22010	962.753	343.307	1.48471	2.00287e-27	1.8446e-26	RKP	2	5143	Related to KPC1 [Source:UniProtKB/TrEMBL;Acc:F4IIK4]	SPRY
AT1G62260	113.404	19.3069	2.53212	2.1789e-27	2.00448e-26	PCMP-E10	1	2075	Pentatricopeptide repeat-containing protein At1g62260, mitochondrial [Source:UniProtKB/Swiss-Prot;Acc:O04590]	-
AT1G60900	2952.43	898.027	1.71549	2.34694e-27	2.15425e-26	U2AF65B	1	2131	Splicing factor U2af large subunit B [Source:UniProtKB/Swiss-Prot;Acc:Q8L716]	RRM_1
AT1G34340	749.526	157.462	2.24576	2.50698e-27	2.29604e-26	-	1	1989	Alpha/beta-Hydrolases superfamily protein [Source:UniProtKB/TrEMBL;Acc:Q9XID7]	Abhydrolase_1
AT3G03965	94.6372	9.03245	3.39244	2.51791e-27	2.3052e-26	-	3	522	-	-
AT4G14070	628.147	309.432	1.0176	2.52722e-27	2.31286e-26	AAE15	4	2511	Long-chain-fatty-acid--[acyl-carrier-protein] ligase AEE15, chloroplastic [Source:UniProtKB/Swiss-Prot;Acc:Q8W471]	AMP-binding
AT5G65440	1672.95	398.499	2.06561	2.71024e-27	2.47852e-26	-	5	4156	unknown protein; INVOLVED IN: biological_process unknown; LOCATED IN: plasma membrane; EXPRESSED IN: 22 plant structures; EXPRESSED DURING: 13 growth stages; BEST Arabidopsis thaliana protein match is: unknown protein (TAIR:AT4G24610.1); Has 30201 B /.../its to 17322 proteins in 780 species: Archae - 12; Bacteria - 1396; Metazoa - 17338; Fungi - 3422; Plants - 5037; Viruses - 0; Other Eukaryotes …	-
AT3G32920	110.901	3.74371	4.84371	2.88628e-27	2.63853e-26	-	3	1983	Putative DNA repair protein recA homolog 4 [Source:UniProtKB/Swiss-Prot;Acc:Q3EAS6]	-
AT1G28320	819.801	289.742	1.49243	3.0091e-27	2.74878e-26	DEG15	1	2725	Glyoxysomal processing protease, glyoxysomal [Source:UniProtKB/Swiss-Prot;Acc:Q8VZD4]	-
AT4G14140	109.872	5.26342	4.3337	3.01923e-27	2.75702e-26	MET2	4	4783	DNA methyltransferase 2 [Source:TAIR;Acc:AT4G14140]	DNA_methylase
AT3G10405	444.013	155.902	1.50526	3.24025e-27	2.95338e-26	-	3	2331	At3g10405 [Source:UniProtKB/TrEMBL;Acc:A0JQ78]	RRM_1
AT1G60640	897.155	230.733	1.95343	3.34534e-27	3.0458e-26	-	1	1527	unknown protein; Ha. [Source:TAIR;Acc:AT1G60640]	-
AT1G43640	873.087	399.123	1.12694	3.39841e-27	3.09298e-26	TULP5	1	1759	Tubby-like F-box protein 5 [Source:UniProtKB/Swiss-Prot;Acc:Q944S3]	Tub
AT1G48540	704.308	236.68	1.56407	3.57181e-27	3.24721e-26	-	1	3630	Outer arm dynein light chain 1 protein [Source:UniProtKB/TrEMBL;Acc:F4HYH4]	-
AT1G17680	814.48	254.857	1.67015	3.6182e-27	3.28697e-26	-	1	3243	Tetratricopeptide repeat (TPR)-containing protein [Source:UniProtKB/TrEMBL;Acc:Q8GUP0]	-
AT2G02515	95.0597	5.77888	3.96435	3.65562e-27	3.31974e-26	-	2	470	At2g02515 [Source:UniProtKB/TrEMBL;Acc:Q8S8R5]	-
AT1G78540	377.125	98.2087	1.92767	3.74495e-27	3.39947e-26	SHB	1	2692	-	-
AT1G51720	766.579	336.959	1.18218	3.74617e-27	3.39947e-26	-	1	3014	Amino acid dehydrogenase family protein [Source:UniProtKB/TrEMBL;Acc:F4I9M9]	-
AT1G05840	863.757	279.492	1.62214	4.12221e-27	3.73523e-26	-	1	1700	Eukaryotic aspartyl protease family protein [Source:UniProtKB/TrEMBL;Acc:F4IAD5]	-
AT2G01905	98.4078	5.06043	4.25677	4.14804e-27	3.75726e-26	CYCJ18	2	3280	Cyclin-J18 [Source:UniProtKB/Swiss-Prot;Acc:Q9C5X2]	-
AT5G62760	548.659	143.553	1.92616	4.39562e-27	3.97859e-26	-	5	4183	P-loop containing nucleoside triphosphate hydrolases superfamily protein [Source:UniProtKB/TrEMBL;Acc:F4K7T1]	-
AT3G55160	770.831	317.595	1.27382	5.16707e-27	4.66831e-26	-	3	6975	Thyroid adenoma-associated-like protein [Source:UniProtKB/TrEMBL;Acc:F4JFA0]	-
AT5G22750	395.939	137.325	1.51788	5.54412e-27	5.0053e-26	RAD5	5	3665	DNA repair protein RAD5A [Source:UniProtKB/Swiss-Prot;Acc:Q9FNI6]	SNF2_N
AT2G30740	792.454	306.514	1.36531	5.736e-27	5.17664e-26	PTI12	2	2638	PTI1-like tyrosine-protein kinase 2 [Source:UniProtKB/Swiss-Prot;Acc:O49339]	Pkinase_Tyr
AT1G09460	391.323	142.711	1.44107	5.81575e-27	5.24562e-26	-	1	1466	Carbohydrate-binding X8 domain superfamily protein [Source:UniProtKB/TrEMBL;Acc:F4I0Z2]	-
AT5G04320	630.458	207.092	1.59874	5.90516e-27	5.32153e-26	SGO2	5	2108	SHUGOSHIN 2 [Source:UniProtKB/Swiss-Prot;Acc:Q0WTB8]	-
AT4G13020	1054.37	391.264	1.4248	6.17068e-27	5.55474e-26	MHK	4	2562	Protein kinase superfamily protein [Source:UniProtKB/TrEMBL;Acc:F4JS69]	Pkinase
AT2G32040	735.251	350.79	1.06656	6.22719e-27	5.60357e-26	-	2	2214	Folate-biopterin transporter 1, chloroplastic [Source:UniProtKB/Swiss-Prot;Acc:Q9SKZ5]	-
AT5G24630	203.687	57.42	1.80246	6.90637e-27	6.20569e-26	BIN4	5	2058	DNA-binding protein BIN4 [Source:UniProtKB/Swiss-Prot;Acc:Q9FLU1]	-
AT4G39917	104.589	4.84557	4.43612	6.94215e-27	6.23558e-26	LCR45	4	249	Defensin-like protein 75 [Source:UniProtKB/Swiss-Prot;Acc:P82760]	-
AT5G37340	218.259	71.813	1.61314	7.25846e-27	6.51732e-26	-	5	2223	ZPR1 zinc-finger domain protein [Source:UniProtKB/TrEMBL;Acc:F4K746]	-
AT1G69060	424.908	142.502	1.56834	7.42908e-27	6.6681e-26	-	1	2458	Chaperone DnaJ-domain superfamily protein [Source:UniProtKB/TrEMBL;Acc:Q8RWZ0]	-
AT2G03060	226.688	71.8838	1.65957	7.83582e-27	7.02552e-26	AGL30	2	2334	Agamous-like MADS-box protein AGL30 [Source:UniProtKB/Swiss-Prot;Acc:Q1PFA4]	SRF-TF
AT2G04031	104.173	4.26505	4.53881	7.9977e-27	7.16547e-26	-	2	624	Prolamin-like protein (DUF784) [Source:UniProtKB/TrEMBL;Acc:A7REG6]	-
AT5G58160	225.789	56.7369	1.99172	8.15317e-27	7.30211e-26	FH13	5	4426	Formin-like protein 13 [Source:UniProtKB/Swiss-Prot;Acc:Q9LVN1]	FH2
AT3G16030	97.374	5.54343	4.15074	8.23256e-27	7.37054e-26	CES101	3	3323	Lectin protein kinase family protein [Source:UniProtKB/TrEMBL;Acc:A0A1I9LPL5]	Pkinase_Tyr
AT4G15210	7419.63	3506.57	1.08083	8.56198e-27	7.65992e-26	BAM5	4	2642	Beta-amylase 5 [Source:UniProtKB/Swiss-Prot;Acc:P25853]	-
AT5G43403	113.82	22.044	2.34279	8.56634e-27	7.66105e-26	-	5	873	other RNA [Source:TAIR;Acc:AT5G43403]	-
AT3G56040	853.288	264.294	1.68502	8.63482e-27	7.71949e-26	UGP3	3	3052	UTP--glucose-1-phosphate uridylyltransferase 3, chloroplastic [Source:UniProtKB/Swiss-Prot;Acc:F4IY62]	-
AT2G19930	173.372	22.8616	2.86515	9.74008e-27	8.68874e-26	-	2	3334	RNA-dependent RNA polymerase family protein [Source:TAIR;Acc:AT2G19930]	-
AT2G46560	2104.16	484.535	2.11584	1.08501e-26	9.64757e-26	-	2	7863	Transducin family protein / WD-40 repeat family protein [Source:UniProtKB/TrEMBL;Acc:F4IJ68]	-
AT3G24630	410.565	192.602	1.08497	1.18239e-26	1.04946e-25	-	3	2725	unknown protein; Ha. [Source:TAIR;Acc:AT3G24630]	-
AT1G20970	2565.84	719.998	1.83149	1.28364e-26	1.13688e-25	-	1	5065	FUNCTIONS IN: molecular_function unknown; INVOLVED IN: biological_process unknown; LOCATED IN: plasma membrane, vacuole; EXPRESSED IN: guard cell, cultured cell; BEST Arabidopsis thaliana protein match is: proton pump interactor 1 (TAIR:AT4G27500.1). [Source:TAIR;Acc:AT1G20970]	-
AT1G31175	338.654	124.692	1.43365	1.35456e-26	1.1984e-25	-	1	2157	At1g31175 [Source:UniProtKB/TrEMBL;Acc:Q9SA13]	-
AT5G67240	1371.93	305.542	2.1618	1.35544e-26	1.19875e-25	SDN3	5	2879	SDN3 [Source:UniProtKB/TrEMBL;Acc:A0A178UGK8]	-
AT3G49640	393.89	170.308	1.20433	1.39971e-26	1.23746e-25	-	3	1755	Aldolase-type TIM barrel family protein [Source:UniProtKB/TrEMBL;Acc:F4IY04]	Dus
AT1G32120	547.959	236.371	1.20939	1.40966e-26	1.24581e-25	-	1	3886	FUNCTIONS IN: molecular_function unknown; INVOLVED IN: biological_process unknown; LOCATED IN: membrane; EXPRESSED IN: 14 plant structures; EXPRESSED DURING: 4 anthesis, C globular stage, F mature embryo stage, petal differentiation and expansion st /.../ expanded cotyledon stage; CONTAINS InterPro DOMAIN/s: Aminotransferase-like, plant mobile domain (InterPro:IPR019557), Protein of unknown funct…	-
AT3G13690	1993.64	869.233	1.19505	1.48144e-26	1.30832e-25	-	3	3862	Kinase with adenine nucleotide alpha hydrolases-like domain-containing protein [Source:UniProtKB/TrEMBL;Acc:Q9LIC9]	Pkinase
AT3G50430	346.155	67.7135	2.33474	1.50012e-26	1.32434e-25	-	3	2414	Golgin [Source:UniProtKB/TrEMBL;Acc:Q84TJ4]	-
AT1G50745	100.489	11.6954	3.1463	1.54441e-26	1.36247e-25	-	1	1568	Plant mobile domain protein [Source:UniProtKB/TrEMBL;Acc:A0A1P8AP45]	-
AT1G03960	419.486	101.811	2.03607	1.6355e-26	1.4418e-25	B''EPSILON	1	2768	Probable serine/threonine protein phosphatase 2A regulatory subunit B''epsilon [Source:UniProtKB/Swiss-Prot;Acc:Q84JI6]	-
AT2G03730	453.495	212.526	1.09068	1.66162e-26	1.4643e-25	ACR5	2	2014	ACT domain-containing protein ACR5 [Source:UniProtKB/Swiss-Prot;Acc:Q9ZPQ8]	ACT
AT4G37080	466.884	183.437	1.33797	1.68281e-26	1.48139e-25	-	4	3186	Protein of unknown function, DUF547 [Source:TAIR;Acc:AT4G37080]	-
AT4G14760	910.441	248.715	1.8688	1.6948e-26	1.49141e-25	NET1B	4	5964	Protein NETWORKED 1B [Source:UniProtKB/Swiss-Prot;Acc:F4JIF4]	-
AT2G30990	277.917	100.481	1.46568	2.02844e-26	1.78184e-25	-	2	2848	Protein of unknown function (DUF688) [Source:TAIR;Acc:AT2G30990]	-
AT1G75010	385.367	147.059	1.38159	2.19835e-26	1.92835e-25	ARC3	1	2564	Protein ACCUMULATION AND REPLICATION OF CHLOROPLASTS 3 [Source:UniProtKB/Swiss-Prot;Acc:Q6F6B5]	MORN
AT1G12290	101.447	14.1004	2.86811	2.20523e-26	1.9337e-25	-	1	3989	Probable disease resistance protein At1g12290 [Source:UniProtKB/Swiss-Prot;Acc:P60839]	NB-ARC
AT1G29750	875.764	247.665	1.81472	2.25129e-26	1.97199e-25	RKF1	1	4167	Probable LRR receptor-like serine/threonine-protein kinase RFK1 [Source:UniProtKB/Swiss-Prot;Acc:Q9FXF2]	Pkinase_Tyr
AT1G12430	1454.14	715.333	1.02186	2.40027e-26	2.10101e-25	ARK3	1	3411	Kinesin-like protein [Source:UniProtKB/TrEMBL;Acc:F4IC87]	Kinesin
AT5G16630	482.912	195.924	1.29011	2.44824e-26	2.14224e-25	RAD4	5	3313	DNA repair protein RAD4 [Source:UniProtKB/Swiss-Prot;Acc:Q8W489]	Transglut_core
AT4G11845	114.947	15.2796	2.94515	2.54614e-26	2.22711e-25	-	4	726	Interleukin-1 receptor-associated kinase 4 protein [Source:UniProtKB/TrEMBL;Acc:F4JPT1]	-
AT2G33820	338.858	139.156	1.28304	2.66936e-26	2.33406e-25	ATMBAC1	2	1272	Mitochondrial substrate carrier family protein [Source:TAIR;Acc:AT2G33820]	Mito_carr
AT5G26170	131.841	17.3981	2.92037	2.7129e-26	2.3713e-25	WRKY50	5	1082	Probable WRKY transcription factor 50 [Source:UniProtKB/Swiss-Prot;Acc:Q8VWQ5]	WRKY
AT5G43730	208.32	49.438	2.04846	2.72987e-26	2.38528e-25	-	5	4256	Probable disease resistance protein At5g43730 [Source:UniProtKB/Swiss-Prot;Acc:Q9FG91]	NB-ARC
AT5G61140	1887.94	383.043	2.29806	2.75413e-26	2.40563e-25	BRR2C	5	6778	DExH-box ATP-dependent RNA helicase DExH14 [Source:UniProtKB/Swiss-Prot;Acc:Q9FNQ1]	Sec63
AT4G32850	2278.6	953.782	1.2549	2.90288e-26	2.53287e-25	nPAP	4	4000	nuclear poly(a) polymerase [Source:TAIR;Acc:AT4G32850]	NTP_transf_2
AT1G56145	384.124	66.9271	2.51779	2.95104e-26	2.57399e-25	-	1	3591	Leucine-rich repeat transmembrane protein kinase [Source:UniProtKB/TrEMBL;Acc:F4I3K4]	Pkinase_Tyr
AT5G01780	456.594	143.053	1.66889	2.96736e-26	2.58731e-25	-	5	2109	2-oxoglutarate-dependent dioxygenase family protein [Source:UniProtKB/TrEMBL;Acc:F4KAV2]	-
AT5G58040	2108.84	629.155	1.74287	2.97334e-26	2.5916e-25	FIPS5	5	4208	FIP1[V]-like protein [Source:UniProtKB/Swiss-Prot;Acc:F4KDH9]	-
AT1G59820	1028.7	439.986	1.22111	2.98399e-26	2.59997e-25	ALA3	1	4299	Phospholipid-transporting ATPase [Source:UniProtKB/TrEMBL;Acc:A0A178WFR7]	E1-E2_ATPase
AT3G27610	272.694	91.8675	1.55523	3.16312e-26	2.75411e-25	-	3	1868	At3g27610 [Source:UniProtKB/TrEMBL;Acc:Q84Q59]	CTP_transf_2
AT5G64840	1867.1	874.756	1.09112	3.16839e-26	2.75773e-25	ABCF5	5	2874	GCN5 [Source:UniProtKB/TrEMBL;Acc:A0A178UAA3]	ABC_tran
AT3G51630	1372.04	544.333	1.33046	3.18413e-26	2.76947e-25	WNK5	3	2535	Probable serine/threonine-protein kinase WNK5 [Source:UniProtKB/Swiss-Prot;Acc:Q9SCU5]	Pkinase
AT5G28390	172.321	18.5075	3.1797	3.25635e-26	2.8303e-25	-	5	543	RNA-binding (RRM/RBD/RNP motifs) family protein [Source:UniProtKB/TrEMBL;Acc:F4K739]	RRM_1
AT2G34930	295.255	79.4279	1.87693	3.4303e-26	2.9794e-25	-	2	3081	Disease resistance family protein / LRR family protein [Source:UniProtKB/TrEMBL;Acc:O64757]	LRRNT_2
AT2G27880	4607.67	1597.21	1.52735	3.70613e-26	3.21558e-25	AGO5	2	3381	Protein argonaute 5 [Source:UniProtKB/Swiss-Prot;Acc:Q9SJK3]	Piwi
AT4G37480	334.861	103.429	1.71046	3.7595e-26	3.26074e-25	-	4	1730	Chaperone DnaJ-domain superfamily protein [Source:UniProtKB/TrEMBL;Acc:F4JS27]	DnaJ
AT5G23570	2138	917.002	1.21861	3.76465e-26	3.26406e-25	SGS3	5	2966	Protein SUPPRESSOR OF GENE SILENCING 3 [Source:UniProtKB/Swiss-Prot;Acc:Q9LDX1]	-
AT1G33415	121.387	27.3587	2.1355	3.89793e-26	3.37844e-25	-	1	6708	other RNA [Source:TAIR;Acc:AT1G33415]	-
AT1G63490	848.223	178.145	2.24308	4.04637e-26	3.50587e-25	-	1	5123	transcription factor jumonji (jmjC) domain-containing protein [Source:TAIR;Acc:AT1G63490]	JmjC
AT1G64600	490.972	154.446	1.66403	4.08368e-26	3.53695e-25	-	1	1908	At1g64600 [Source:UniProtKB/TrEMBL;Acc:Q8GW63]	-
AT3G55480	1067.89	497.801	1.10005	4.41498e-26	3.81988e-25	PAT2	3	3621	AP-3 complex subunit beta [Source:UniProtKB/TrEMBL;Acc:F4IWW1]	-
AT1G58180	200.791	70.8464	1.50964	4.57154e-26	3.95118e-25	BCA6	1	1977	Beta carbonic anhydrase 6, mitochondrial [Source:UniProtKB/Swiss-Prot;Acc:Q9C6F5]	-
AT1G31530	121.815	23.9131	2.33514	4.5851e-26	3.96152e-25	-	1	852	DNAse I-like superfamily protein [Source:UniProtKB/TrEMBL;Acc:Q9C6U7]	Exo_endo_phos
AT1G09230	426.758	186.623	1.19058	4.75604e-26	4.10778e-25	SNRNP65	1	1739	U11/U12 small nuclear ribonucleoprotein 65 kDa protein [Source:UniProtKB/Swiss-Prot;Acc:Q8RWV8]	RRM_1
AT1G50410	872.265	213.038	2.02776	4.7619e-26	4.1114e-25	CHR28	1	4027	Helicase-like transcription factor CHR28 [Source:UniProtKB/Swiss-Prot;Acc:Q94BR5]	SNF2_N
AT3G02860	411.843	176.768	1.217	4.84776e-26	4.18407e-25	-	3	1412	F13E7.20 protein [Source:UniProtKB/TrEMBL;Acc:Q9M8S7]	-
AT4G29790	826.361	350.718	1.23516	4.90961e-26	4.2345e-25	-	4	4588	AT4g29790/F27B13_30 [Source:UniProtKB/TrEMBL;Acc:Q9SZQ2]	-
AT5G04460	637.506	218.854	1.53747	4.97246e-26	4.28721e-25	-	5	3572	RING/U-box superfamily protein [Source:UniProtKB/TrEMBL;Acc:F4JWA1]	-
AT5G01510	266.985	80.2083	1.74012	5.01156e-26	4.31941e-25	RUS5	5	2157	Protein root UVB sensitive 5 [Source:UniProtKB/Swiss-Prot;Acc:B6IDH3]	-
AT5G60430	166.703	44.1861	1.93799	5.02867e-26	4.33265e-25	-	5	1609	Antiporter/ drug transporter [Source:UniProtKB/TrEMBL;Acc:Q9FKK3]	-
AT1G48780	111.59	18.0111	2.6279	5.11741e-26	4.4045e-25	-	1	1507	Uncharacterized protein F11I4_5 [Source:UniProtKB/TrEMBL;Acc:Q9C746]	-
AT1G77525	556.819	73.1975	2.93639	5.34248e-26	4.59502e-25	-	1	428	unknown protein; FUNCTIONS IN: molecular_function unknown; INVOLVED IN: biological_process unknown; LOCATED IN: endomembrane system; Ha. [Source:TAIR;Acc:AT1G77525]	-
AT5G22640	2903.46	1268.35	1.19287	5.39011e-26	4.63437e-25	TIC100	5	3226	Protein TIC 100 [Source:UniProtKB/Swiss-Prot;Acc:Q8LPR8]	-
AT3G11720	173.598	39.9594	2.1054	5.77801e-26	4.96443e-25	-	3	2241	Polyketide cyclase/dehydrase and lipid transport superfamily protein [Source:UniProtKB/TrEMBL;Acc:F4J7F3]	-
AT4G03000	610.002	212.141	1.52036	6.05281e-26	5.19692e-25	RF298	4	3458	Putative E3 ubiquitin-protein ligase RF298 [Source:UniProtKB/Swiss-Prot;Acc:Q0WPJ7]	-
AT1G24560	647.53	266.706	1.27748	6.27227e-26	5.37975e-25	-	1	2559	Paramyosin [Source:UniProtKB/TrEMBL;Acc:Q8LPK7]	-
AT5G26240	966.381	265.652	1.85919	6.37943e-26	5.46976e-25	CLC-D	5	2987	Chloride channel protein CLC-d [Source:UniProtKB/Swiss-Prot;Acc:P92943]	Voltage_CLC
AT1G74320	548.026	266.557	1.03679	6.44004e-26	5.51981e-25	-	1	1664	Probable choline kinase 2 [Source:UniProtKB/Swiss-Prot;Acc:Q8L518]	Choline_kinase
AT1G49520	242.12	28.8794	3.06809	6.53116e-26	5.59403e-25	-	1	1607	At1g49520 [Source:UniProtKB/TrEMBL;Acc:Q501B9]	-
AT1G68170	158.988	47.9677	1.72054	7.37333e-26	6.30662e-25	-	1	1719	nodulin MtN21 /EamA-like transporter family protein [Source:TAIR;Acc:AT1G68170]	DUF6
AT3G45970	260.604	88.5459	1.55637	8.16117e-26	6.97325e-25	EXLA1	3	1065	Expansin-like A1 [Source:UniProtKB/Swiss-Prot;Acc:Q9LZT4]	-
AT2G41310	482.265	108.863	2.13217	8.50756e-26	7.2667e-25	ARR8	2	2370	Two-component response regulator ARR8 [Source:UniProtKB/Swiss-Prot;Acc:O80365]	Response_reg
AT3G63070	1456.48	451.108	1.68789	8.67286e-26	7.40278e-25	HULK3	3	4429	Protein HUA2-LIKE 3 [Source:UniProtKB/Swiss-Prot;Acc:F4IZM8]	PWWP
AT5G44490	102.903	10.205	3.28641	8.98662e-26	7.66529e-25	-	5	1765	FBD-associated F-box protein At5g44490 [Source:UniProtKB/Swiss-Prot;Acc:Q9FI16]	LRR_2
AT2G36080	272.116	78.3508	1.78529	9.00072e-26	7.67467e-25	ARF31	2	3376	B3 domain-containing protein At2g36080 [Source:UniProtKB/Swiss-Prot;Acc:Q8GYJ2]	B3
AT1G15960	169.096	31.4829	2.45649	9.53135e-26	8.12153e-25	NRAMP6	1	3160	Metal transporter Nramp6 [Source:UniProtKB/Swiss-Prot;Acc:Q9S9N8]	-
AT1G31360	471	146.78	1.67244	9.5837e-26	8.16332e-25	RECQL2	1	2747	RECQ helicase L2 [Source:TAIR;Acc:AT1G31360]	DEAD
AT3G02680	232.853	81.7375	1.49868	9.65333e-26	8.21979e-25	NBS1	3	1928	Nijmegen breakage syndrome 1 protein [Source:UniProtKB/Swiss-Prot;Acc:Q0H8D7]	FHA
AT3G07215	411.234	124.992	1.73388	1.04309e-25	8.85749e-25	-	3	1754	other RNA [Source:TAIR;Acc:AT3G07215]	-
AT3G44670	1735.27	302.556	2.51695	1.04878e-25	8.90277e-25	-	3	4393	Disease resistance protein (TIR-NBS-LRR class) family [Source:UniProtKB/TrEMBL;Acc:F4J361]	TIR
AT5G24580	2055.63	909.181	1.17479	1.10404e-25	9.36858e-25	HIPP09	5	1677	Heavy metal-associated isoprenylated plant protein 9 [Source:UniProtKB/Swiss-Prot;Acc:Q9FLU5]	HMA
AT4G12290	327.915	125.158	1.38769	1.10642e-25	9.38557e-25	-	4	3024	Amine oxidase [Source:UniProtKB/TrEMBL;Acc:Q8L742]	-
AT3G53830	368.72	162.839	1.18658	1.12289e-25	9.52202e-25	-	3	2172	Regulator of chromosome condensation (RCC1) family protein [Source:UniProtKB/TrEMBL;Acc:A0A1I9LSN7]	-
AT5G35753	396.175	100.496	1.96731	1.14063e-25	9.66917e-25	-	5	2335	Domain of unknown function (DUF3444) [Source:TAIR;Acc:AT5G35753]	-
AT3G56000	107.548	4.15874	4.78676	1.15337e-25	9.77375e-25	CSLA14	3	2002	Probable glucomannan 4-beta-mannosyltransferase 14 [Source:UniProtKB/Swiss-Prot;Acc:Q84W06]	-
AT2G25170	3126.16	865.19	1.852	1.16345e-25	9.85581e-25	PKL	2	4608	chromatin remodeling factor CHD3 (PICKLE) [Source:TAIR;Acc:AT2G25170]	SNF2_N
AT5G58790	232.952	71.4103	1.70857	1.18839e-25	1.00637e-24	-	5	986	unknown protein; Ha. [Source:TAIR;Acc:AT5G58790]	-
AT3G08020	740.143	301.525	1.29153	1.19509e-25	1.01169e-24	-	3	2970	PHD finger family protein [Source:UniProtKB/TrEMBL;Acc:Q0WKW1]	-
AT1G61370	105.555	9.77247	3.44357	1.26042e-25	1.0659e-24	-	1	3473	G-type lectin S-receptor-like serine/threonine-protein kinase At1g61370 [Source:UniProtKB/Swiss-Prot;Acc:O64783]	Pkinase_Tyr
AT5G22450	1721.19	515.149	1.73682	1.27723e-25	1.07975e-24	-	5	4116	unknown protein; LOCATED IN: chloroplast; EXPRESSED IN: 22 plant structures; EXPRESSED DURING: 13 growth stages; BEST Arabidopsis thaliana protein match is: unknown protein (TAIR:AT2G19390.1); Ha. [Source:TAIR;Acc:AT5G22450]	-
AT3G43840	100.587	16.7899	2.58684	1.29098e-25	1.09062e-24	-	3	793	3-oxo-5-alpha-steroid 4-dehydrogenase family protein [Source:UniProtKB/TrEMBL;Acc:Q9LZG4]	-
AT4G24480	154.248	40.827	1.90599	1.55402e-25	1.30927e-24	-	4	3638	Protein kinase superfamily protein [Source:UniProtKB/TrEMBL;Acc:F4JQX7]	Pkinase_Tyr
AT5G16680	1065.87	275.362	1.94776	1.56708e-25	1.31982e-24	-	5	4668	RING/FYVE/PHD zinc finger superfamily protein [Source:UniProtKB/TrEMBL;Acc:F4KE59]	-
AT2G40770	575.279	126.435	2.17561	1.63845e-25	1.37946e-24	-	2	5376	RING-finger, DEAD-like helicase, PHD and SNF2 domain-containing protein [Source:UniProtKB/TrEMBL;Acc:F4II36]	SNF2_N
AT1G10320	574.604	76.5662	2.89394	1.70114e-25	1.43078e-24	-	1	2323	Zinc finger CCCH domain-containing protein 5 [Source:UniProtKB/Swiss-Prot;Acc:Q9SY74]	zf-CCCH
AT1G55250	859.12	219.921	1.95945	1.75824e-25	1.47729e-24	HUB2	1	3839	E3 ubiquitin-protein ligase BRE1-like 2 [Source:UniProtKB/Swiss-Prot;Acc:Q9C895]	-
AT3G25690	1299.6	321.911	2.00952	1.87181e-25	1.57111e-24	CHUP1	3	4447	Hydroxyproline-rich glycoprotein family protein [Source:UniProtKB/TrEMBL;Acc:A0A1I9LT48]	-
AT3G19840	715.454	178.096	2.00254	1.90484e-25	1.59667e-24	MED35C	3	3031	Pre-mRNA-processing protein 40C [Source:UniProtKB/Swiss-Prot;Acc:Q9LT25]	FF
AT2G44750	269.133	103.104	1.39369	1.90625e-25	1.59731e-24	TPK2	2	1009	Thiamine pyrophosphokinase 2 [Source:UniProtKB/Swiss-Prot;Acc:F4IV16]	-
AT1G04200	830.481	411.305	1.00787	1.92524e-25	1.61267e-24	-	1	3102	Dyggve-melchior-clausen syndrome protein [Source:UniProtKB/TrEMBL;Acc:Q8RWV1]	-
AT5G56210	306.473	119.079	1.36189	1.9306e-25	1.61661e-24	WIP2	5	2182	WPP domain-interacting protein 2 [Source:UniProtKB/Swiss-Prot;Acc:Q9FH18]	-
AT5G66930	523.269	239.156	1.13676	1.94106e-25	1.62483e-24	-	5	1114	unknown protein; CONTAINS InterPro DOMAIN/s: Protein of unknown function DUF1649 (InterPro:IPR012445); Ha. [Source:TAIR;Acc:AT5G66930]	-
AT3G57850	150.365	1.7745	6.28334	2.28562e-25	1.91001e-24	-	3	303	Transmembrane protein [Source:UniProtKB/TrEMBL;Acc:Q9M2R2]	Self-incomp_S1
AT2G35765	108.847	8.46437	3.78649	2.37898e-25	1.98535e-24	-	2	455	Putative uncharacterized protein [Source:UniProtKB/TrEMBL;Acc:Q1G3S0]	-
AT1G23010	688.652	336.032	1.02836	2.43475e-25	2.0312e-24	LPR1	1	2292	Multicopper oxidase LPR1 [Source:UniProtKB/Swiss-Prot;Acc:F4I4K5]	-
AT4G19610	879.039	290.762	1.59182	2.45475e-25	2.0472e-24	-	4	2881	Nucleotide/nucleic acid binding protein [Source:UniProtKB/TrEMBL;Acc:F4JT92]	RRM_1
AT4G34890	1021.43	483.243	1.07563	2.50254e-25	2.08635e-24	XDH1	4	4457	Xanthine dehydrogenase 1 [Source:UniProtKB/Swiss-Prot;Acc:Q8GUQ8]	Fer2
AT1G64060	187.957	43.7314	2.08698	2.52294e-25	2.10265e-24	RBOHF	1	3994	Respiratory burst oxidase homolog protein F [Source:UniProtKB/Swiss-Prot;Acc:O48538]	FAD_binding_8
AT4G25707	99.5413	7.71281	3.78966	2.67239e-25	2.22495e-24	-	4	1229	unknown protein; Ha. [Source:TAIR;Acc:AT4G25707]	-
AT3G27670	936.271	278.55	1.74147	2.91884e-25	2.42932e-24	RST1	3	5902	Protein RST1 [Source:UniProtKB/Swiss-Prot;Acc:Q7XZF5]	-
AT4G33760	897.711	317.989	1.49617	2.92267e-25	2.43169e-24	-	4	2303	Aspartate--tRNA ligase, chloroplastic/mitochondrial [Source:UniProtKB/Swiss-Prot;Acc:F4JJT9]	tRNA-synt_2
AT4G11080	642.239	132.227	2.26952	2.98885e-25	2.48353e-24	HMGB13	4	2188	High mobility group B protein 13 [Source:UniProtKB/Swiss-Prot;Acc:Q9T012]	HMG_box
AT4G22760	151.909	39.4314	1.94899	2.98899e-25	2.48353e-24	PCMP-E6	4	2934	Pentatricopeptide repeat-containing protein At4g22760 [Source:UniProtKB/Swiss-Prot;Acc:P0C8Q5]	PPR
AT4G15570	596.274	280.445	1.08406	3.02437e-25	2.51039e-24	MAA3	4	2998	Probable helicase MAGATAMA 3 [Source:UniProtKB/Swiss-Prot;Acc:B6SFA4]	-
AT1G68130	557.811	253.784	1.12982	3.047e-25	2.52833e-24	IDD14	1	2218	Protein indeterminate-domain 14 [Source:UniProtKB/Swiss-Prot;Acc:Q9C9X7]	-
AT4G16070	356.469	138.109	1.36355	3.08543e-25	2.5585e-24	-	4	2653	Mono-/di-acylglycerol lipase, N-terminal;Lipase, class 3 [Source:TAIR;Acc:AT4G16070]	Lipase_3
AT4G00800	1720.29	344.381	2.31704	3.56753e-25	2.95034e-24	-	4	6256	Transducin family protein / WD-40 repeat family protein [Source:UniProtKB/TrEMBL;Acc:F4JHM9]	-
AT1G64572	140.824	35.803	1.94776	3.77512e-25	3.11785e-24	-	1	490	Unknown gene [Source:TAIR;Acc:AT1G64572]	-
AT1G68910	386.969	140.668	1.44775	3.78552e-25	3.12539e-24	WIT2	1	2364	WPP domain-interacting tail-anchored protein 2 [Source:UniProtKB/Swiss-Prot;Acc:A8MQR0]	-
AT1G19870	3064.28	1386.57	1.1422	3.97311e-25	3.27808e-24	IQD32	1	3364	Protein IQ-DOMAIN 32 [Source:UniProtKB/Swiss-Prot;Acc:Q9FXI5]	-
AT1G17690	791.529	315.401	1.32007	4.08585e-25	3.36997e-24	NOF1	1	2645	U3 small nucleolar RNA-associated protein [Source:UniProtKB/TrEMBL;Acc:Q8H1E7]	-
AT1G05380	1383.53	656.795	1.07158	4.26585e-25	3.51492e-24	-	1	4308	Acyl-CoA N-acyltransferase with RING/FYVE/PHD-type zinc finger protein [Source:UniProtKB/TrEMBL;Acc:Q9ZW00]	PHD
AT5G19600	704.172	284.962	1.30004	4.50887e-25	3.71145e-24	SULTR3;5	5	2359	Probable sulfate transporter 3.5 [Source:UniProtKB/Swiss-Prot;Acc:Q94LW6]	Sulfate_transp
AT3G21180	141.907	34.9564	1.98886	4.71372e-25	3.87749e-24	ACA9	3	3979	Calcium-transporting ATPase [Source:UniProtKB/TrEMBL;Acc:A0A178VER8]	Cation_ATPase_C
AT1G70250	109.534	15.1959	2.80583	5.07594e-25	4.17405e-24	-	1	2745	Receptor serine/threonine kinase [Source:UniProtKB/TrEMBL;Acc:F4I5D4]	Thaumatin
AT1G73850	248.228	65.3814	1.92363	5.21852e-25	4.28845e-24	-	1	2577	Protein of unknown function (DUF1666) [Source:TAIR;Acc:AT1G73850]	-
AT3G03360	321.721	42.0872	2.91971	5.23844e-25	4.30196e-24	-	3	1607	F-box/RNI-like superfamily protein [Source:TAIR;Acc:AT3G03360]	-
AT4G30790	1305.95	404.913	1.68477	5.37043e-25	4.40743e-24	ATG11	4	5298	Autophagy-related protein 11 [Source:UniProtKB/Swiss-Prot;Acc:Q9SUG7]	-
AT5G26692	118.695	24.2339	2.2665	5.55643e-25	4.55705e-24	-	5	677	Putative membrane lipoprotein [Source:UniProtKB/TrEMBL;Acc:Q3E927]	-
AT5G48610	440.446	90.6178	2.26912	5.78103e-25	4.73968e-24	-	5	3204	unknown protein; Ha. [Source:TAIR;Acc:AT5G48610]	-
AT4G15090	662.301	276.659	1.254	5.88963e-25	4.82551e-24	FAR1	4	3533	Protein FAR-RED IMPAIRED RESPONSE 1 [Source:UniProtKB/Swiss-Prot;Acc:Q9SWG3]	FAR1
AT5G47480	2131.23	584.614	1.86355	6.06303e-25	4.96594e-24	MAG5	5	4954	Protein transport protein SEC16A homolog [Source:UniProtKB/Swiss-Prot;Acc:Q9FGK9]	-
AT3G12915	260.18	88.3761	1.5573	6.08264e-25	4.98035e-24	-	3	2872	Ribosomal protein S5/Elongation factor G/III/V family protein [Source:UniProtKB/TrEMBL;Acc:F4JB06]	GTP_EFTU
AT5G60100	96.969	12.9879	2.85215	6.11099e-25	5.00025e-24	PRR3	5	2805	Pseudo-response regulator 3 [Source:UniProtKB/TrEMBL;Acc:F4JXG7]	Response_reg
AT1G49720	274.527	101.68	1.42062	6.15711e-25	5.03632e-24	ABF1	1	1720	Abscisic acid responsive element-binding factor 1 [Source:UniProtKB/TrEMBL;Acc:F4I3C9]	bZIP_1
AT1G04645	151.937	2.2014	6.28963	6.4335e-25	5.25544e-24	SPH5	1	494	S-protein homolog 5 [Source:UniProtKB/Swiss-Prot;Acc:O23020]	Self-incomp_S1
AT5G44180	2095.36	532.296	1.97437	6.45686e-25	5.27278e-24	RLT2	5	6096	Homeobox-DDT domain protein RLT2 [Source:UniProtKB/Swiss-Prot;Acc:Q9FFH1]	DDT
AT5G52070	529.236	186.758	1.51149	6.49261e-25	5.29848e-24	-	5	3289	Agenet domain-containing protein [Source:UniProtKB/TrEMBL;Acc:Q8RXR3]	-
AT1G23090	805.75	320.156	1.32609	6.53379e-25	5.33032e-24	SULTR3;3	1	2690	Probable sulfate transporter 3.3 [Source:UniProtKB/Swiss-Prot;Acc:Q9SXS2]	Sulfate_transp
AT3G45060	85.9292	7.43919	3.53659	7.193e-25	5.85073e-24	NRT2.6	3	1912	High affinity nitrate transporter 2.6 [Source:UniProtKB/Swiss-Prot;Acc:Q9LXH0]	MFS_1
AT1G02990	670.271	188.731	1.82272	7.32323e-25	5.9547e-24	-	1	4845	BEST Arabidopsis thaliana protein match is: CW-type Zinc Finger (TAIR:AT3G62900.1); Ha. [Source:TAIR;Acc:AT1G02990]	-
AT5G01770	696.367	156.738	2.14222	7.38005e-25	5.99696e-24	RAPTOR2	5	5281	Regulatory-associated protein of TOR 2 [Source:UniProtKB/Swiss-Prot;Acc:Q9LZW9]	-
AT5G07400	161.115	46.6023	1.78487	7.46322e-25	6.06056e-24	-	5	3994	At5g07400 [Source:UniProtKB/TrEMBL;Acc:Q84MA4]	Tyr-DNA_phospho
AT3G25430	307.88	126.726	1.27446	7.69103e-25	6.24145e-24	-	3	2092	Poly(A)-specific ribonuclease PARN-like [Source:UniProtKB/Swiss-Prot;Acc:Q8W4C3]	CAF1
AT3G52280	436.952	204.008	1.09672	8.14118e-25	6.59809e-24	GTE6	3	1450	General transcription factor group E6 [Source:UniProtKB/TrEMBL;Acc:F4J6V6]	Bromodomain
AT5G13950	916.034	404.15	1.17722	8.26248e-25	6.68982e-24	-	5	3605	unknown protein; BEST Arabidopsis thaliana protein match is: unknown protein (TAIR:AT1G02290.1); Ha. [Source:TAIR;Acc:AT5G13950]	-
AT1G24070	2739.35	748.742	1.86971	8.28837e-25	6.70858e-24	CSLA10	1	2607	Probable glucomannan 4-beta-mannosyltransferase 10 [Source:UniProtKB/Swiss-Prot;Acc:Q9LR87]	-
AT3G17740	593.499	186.287	1.6635	9.94946e-25	8.02941e-24	-	3	3811	At3g17740 [Source:UniProtKB/TrEMBL;Acc:Q9LSH4]	-
AT2G03140	1101.96	229.715	2.25799	1.00434e-24	8.09732e-24	-	2	7834	alpha/beta-Hydrolases superfamily protein [Source:TAIR;Acc:AT2G03140]	-
AT2G32700	3017.63	1494.23	1.01231	1.04913e-24	8.45568e-24	LUH	2	3254	LEUNIG_homolog [Source:TAIR;Acc:AT2G32700]	WD40
AT5G53090	144.764	33.3899	2.0919	1.10671e-24	8.91103e-24	-	5	1339	At5g53090 [Source:UniProtKB/TrEMBL;Acc:Q66GR1]	adh_short
AT3G50380	1198.77	254.271	2.23252	1.12258e-24	9.03583e-24	-	3	9735	Vacuolar protein sorting-associated protein, putative (DUF1162) [Source:UniProtKB/TrEMBL;Acc:A0A1I9LQ65]	-
AT5G15540	1107.65	218.955	2.33304	1.12877e-24	9.07973e-24	EMB2773	5	6176	Sister chromatid cohesion protein SCC2 [Source:UniProtKB/Swiss-Prot;Acc:A5HEI1]	-
AT1G53800	411.208	195.52	1.06389	1.20558e-24	9.67874e-24	-	1	2204	AT1G53800 protein [Source:UniProtKB/TrEMBL;Acc:B9DHC9]	-
AT4G17610	603.667	256.971	1.22447	1.20763e-24	9.69203e-24	-	4	6340	tRNA/rRNA methyltransferase (SpoU) family protein [Source:TAIR;Acc:AT4G17610]	SpoU_methylase
AT4G14276	185.743	43.6199	2.05733	1.21665e-24	9.76126e-24	-	4	429	Defensin-like protein 21 [Source:UniProtKB/Swiss-Prot;Acc:P0CAX9]	-
AT3G42473	122.244	29.4451	2.08267	1.22772e-24	9.84685e-24	LCR47	3	401	Defensin-like protein 91 [Source:UniProtKB/Swiss-Prot;Acc:P82762]	-
AT3G20475	113.167	26.3278	2.09991	1.26325e-24	1.01252e-23	MSH5	3	2991	DNA mismatch repair protein MSH5 [Source:UniProtKB/Swiss-Prot;Acc:F4JEP5]	-
AT1G32940	160.681	43.2932	1.88635	1.26646e-24	1.01477e-23	SBT3.5	1	3113	Subtilisin-like protease SBT3.5 [Source:UniProtKB/Swiss-Prot;Acc:Q9MAP7]	Peptidase_S8
AT1G26130	616.673	178.99	1.77418	1.31835e-24	1.05566e-23	-	1	4897	Phospholipid-transporting ATPase [Source:UniProtKB/TrEMBL;Acc:F4IE35]	-
AT1G72990	386.867	153.074	1.33568	1.3407e-24	1.07286e-23	BGAL17	1	2655	Beta-galactosidase 17 [Source:UniProtKB/Swiss-Prot;Acc:Q93Z24]	-
AT3G17360	633.818	121.983	2.36838	1.39187e-24	1.11309e-23	POK1	3	6815	Phragmoplast orienting kinesin 1 [Source:UniProtKB/TrEMBL;Acc:A0A1I9LN37]	Kinesin
AT1G72250	948.174	253.599	1.89811	1.46133e-24	1.1675e-23	-	1	4074	Di-glucose binding protein with Kinesin motor domain [Source:TAIR;Acc:AT1G72250]	Kinesin
AT2G44710	1233.69	563.413	1.12918	1.476e-24	1.17885e-23	-	2	3487	At2g44720/F16B22.21 [Source:UniProtKB/TrEMBL;Acc:Q8RWQ1]	RRM_1
novel.177	584.421	272.361	1.10616	1.51761e-24	1.21168e-23	-	4	2651	- && P0DH86.1 RecName: Full=G-type lectin S-receptor-like serine/threonine-protein kinase SRK; Flags: Precursor && PF00954:S-locus glycoprotein domain|PF12398:Receptor serine/threonine kinase|PF07714:Protein tyrosine and serine/threonine kinase	Pkinase_Tyr
AT1G01950	704.86	346.434	1.02348	1.53009e-24	1.22125e-23	ARK2	1	3213	Kinesin-like protein [Source:UniProtKB/TrEMBL;Acc:F4HU83]	Kinesin
AT1G48390	138.293	30.3645	2.19784	1.55475e-24	1.24014e-23	-	1	1597	RNI-like superfamily protein [Source:UniProtKB/TrEMBL;Acc:F4HYE7]	-
AT3G05270	439.78	110.547	1.98264	1.65485e-24	1.31871e-23	FPP3	3	2838	Filament-like plant protein 3 [Source:UniProtKB/Swiss-Prot;Acc:Q9MA92]	-
AT1G71720	652.731	254.133	1.35686	1.83405e-24	1.45916e-23	-	1	1800	F14O23.10 protein [Source:UniProtKB/TrEMBL;Acc:Q9M9H4]	S1
AT1G13350	1387.84	177.749	2.95993	1.84741e-24	1.46931e-23	-	1	2867	Protein kinase superfamily protein [Source:TAIR;Acc:AT1G13350]	Pkinase
AT3G21240	533.473	255.48	1.05929	1.85444e-24	1.47442e-23	4CL2	3	2096	Cinnamyl alcohol dehydrogenase [Source:UniProtKB/TrEMBL;Acc:B1GUZ3]	AMP-binding
AT5G43518	230.361	1.29698	7.48208	1.86821e-24	1.48489e-23	LURE1.4	5	401	Protein LURE 1.4 [Source:UniProtKB/Swiss-Prot;Acc:P0CAY6]	-
AT4G14920	1199.71	420.556	1.50796	1.9184e-24	1.52332e-23	-	4	4218	Acyl-CoA N-acyltransferase with RING/FYVE/PHD-type zinc finger protein [Source:TAIR;Acc:AT4G14920]	PHD
AT1G19650	424.554	135.464	1.63414	2.0319e-24	1.61138e-23	SFH4	1	2493	Phosphatidylinositol/phosphatidylcholine transfer protein SFH4 [Source:UniProtKB/Swiss-Prot;Acc:F4HP88]	-
AT5G07270	656.512	290.097	1.18376	2.05522e-24	1.62934e-23	XBAT33	5	2086	XBAT33 [Source:UniProtKB/TrEMBL;Acc:A0A178U6J8]	-
AT2G17820	285.179	94.8127	1.56978	2.06301e-24	1.63499e-23	AHK1	2	4376	Histidine kinase 1 [Source:UniProtKB/Swiss-Prot;Acc:Q9SXL4]	HATPase_c
AT1G19100	900.375	344.881	1.37961	2.18985e-24	1.73386e-23	MORC6	1	2643	Protein MICRORCHIDIA 6 [Source:UniProtKB/Swiss-Prot;Acc:Q56Y74]	-
AT1G77320	293.658	94.6406	1.61783	2.21184e-24	1.75014e-23	MEI1	1	3587	transcription coactivators [Source:TAIR;Acc:AT1G77320]	-
AT3G06290	1275.09	275.314	2.20657	2.23328e-24	1.76598e-23	SAC3B	3	5561	SAC3 family protein B [Source:UniProtKB/Swiss-Prot;Acc:F4JAU2]	SAC3_GANP
novel.76	167.239	33.5311	2.30061	2.28456e-24	1.80595e-23	-	2	4946	- && P10978.1 RecName: Full=Retrovirus-related Pol polyprotein from transposon TNT 1-94; Includes: RecName: Full=Protease; Includes: RecName: Full=Reverse transcriptase; Includes: RecName: Full=Endonuclease && PF00665:Integrase core domain	rve
AT5G50970	360.273	160.537	1.17328	2.37194e-24	1.87263e-23	-	5	1915	Transducin family protein / WD-40 repeat family protein [Source:UniProtKB/TrEMBL;Acc:Q683G3]	-
AT2G32250	395.32	127.851	1.61622	2.37768e-24	1.87656e-23	FRS2	2	3394	Protein FAR1-RELATED SEQUENCE 2 [Source:UniProtKB/Swiss-Prot;Acc:Q3EBQ3]	FAR1
AT3G24070	422.436	192.86	1.12434	2.5208e-24	1.98888e-23	-	3	1710	At3g24060 [Source:UniProtKB/TrEMBL;Acc:Q940K6]	-
AT1G75310	1035.44	233.494	2.14463	2.86735e-24	2.25798e-23	AUL1	1	4758	auxin-like 1 protein [Source:TAIR;Acc:AT1G75310]	-
AT1G17380	965.64	403.443	1.25458	2.91895e-24	2.29789e-23	TIFY11A	1	2237	Protein TIFY 11A [Source:UniProtKB/Swiss-Prot;Acc:Q9LDU5]	Zim
AT5G07890	371.34	113.644	1.70086	3.06401e-24	2.41113e-23	-	5	2132	AT5G07890 protein [Source:UniProtKB/TrEMBL;Acc:B9DG86]	-
AT1G75850	746.044	206.107	1.84782	3.06573e-24	2.41113e-23	VPS35B	1	2768	Vacuolar protein sorting-associated protein 35 [Source:UniProtKB/TrEMBL;Acc:A0A178WDK6]	-
AT5G11850	822.767	285.639	1.51933	3.10542e-24	2.44079e-23	-	5	3341	AT5g11850/F14F18_20 [Source:UniProtKB/TrEMBL;Acc:Q8S9K4]	Pkinase_Tyr
AT2G24592	302.905	120.563	1.33136	3.15645e-24	2.48011e-23	-	2	483	unknown protein; LOCATED IN: endomembrane system; Ha. [Source:TAIR;Acc:AT2G24592]	-
AT3G49551	85.6407	4.34638	4.24924	3.1957e-24	2.50936e-23	-	3	168	unknown protein; Ha. [Source:TAIR;Acc:AT3G49551]	-
AT5G08600	149.958	14.7978	3.29993	3.26673e-24	2.56351e-23	-	5	3147	U3 ribonucleoprotein (Utp) family protein [Source:UniProtKB/TrEMBL;Acc:F4KB50]	Utp14
AT1G65040	1570.2	648.942	1.27848	3.30006e-24	2.58884e-23	HRD1B	1	2981	ERAD-associated E3 ubiquitin-protein ligase HRD1B [Source:UniProtKB/Swiss-Prot;Acc:Q6NPT7]	-
AT3G62910	420.557	206.986	1.02355	3.38634e-24	2.65567e-23	APG3	3	1620	Peptide chain release factor APG3, chloroplastic [Source:UniProtKB/Swiss-Prot;Acc:Q8RX79]	-
AT4G08990	116.577	10.8175	3.47785	3.67906e-24	2.87975e-23	MET2	4	4539	DNA (cytosine-5)-methyltransferase 2 [Source:UniProtKB/Swiss-Prot;Acc:Q9M0S8]	DNA_methylase
AT4G24050	756.563	358.181	1.07282	4.11085e-24	3.21163e-23	-	4	2033	AT4g24050/T19F6_40 [Source:UniProtKB/TrEMBL;Acc:O22985]	adh_short
AT4G12560	1125.84	449.669	1.3258	4.11589e-24	3.21455e-23	CPR1	4	1994	F-box protein CPR1 [Source:UniProtKB/Swiss-Prot;Acc:Q9SU30]	-
AT3G24715	96.2688	9.79263	3.27285	4.24879e-24	3.31562e-23	-	3	4165	Kinase superfamily with octicosapeptide/Phox/Bem1p domain-containing protein [Source:UniProtKB/TrEMBL;Acc:Q9LRY7]	Pkinase_Tyr
AT2G01750	616.438	265.352	1.20685	4.24931e-24	3.31562e-23	MAP70-3	2	3162	Microtubule-associated proteins 70-3 [Source:UniProtKB/TrEMBL;Acc:F4IPB2]	-
AT3G63510	397.939	163.973	1.27629	4.4498e-24	3.46986e-23	-	3	1378	FMN-linked oxidoreductases superfamily protein [Source:UniProtKB/TrEMBL;Acc:Q8H128]	Dus
AT3G01710	268.876	101.415	1.39779	4.52161e-24	3.52427e-23	-	3	1719	TPX2 (Targeting protein for Xklp2) protein family [Source:UniProtKB/TrEMBL;Acc:A0A1I9LPX1]	-
AT1G76570	155.475	48.9863	1.67957	4.52243e-24	3.52427e-23	LHCB7	1	1215	Chlorophyll a-b binding protein 7, chloroplastic [Source:UniProtKB/Swiss-Prot;Acc:Q9C9K1]	-
AT4G20060	201.072	58.2338	1.78138	4.59854e-24	3.58133e-23	EMB1895	4	3902	ARM repeat superfamily protein [Source:UniProtKB/TrEMBL;Acc:O49433]	-
AT4G33200	1680.14	436.349	1.9413	4.62645e-24	3.60079e-23	XI-I	4	5063	myosin, putative [Source:TAIR;Acc:AT4G33200]	Myosin_head
AT4G29900	1369.07	437.578	1.6427	5.1251e-24	3.98639e-23	ACA10	4	4296	Calcium-transporting ATPase 10, plasma membrane-type [Source:UniProtKB/Swiss-Prot;Acc:Q9SZR1]	Cation_ATPase_C
AT1G15410	558.121	248.596	1.16488	5.14715e-24	4.00102e-23	-	1	2306	Aspartate-glutamate racemase family [Source:UniProtKB/TrEMBL;Acc:Q9XI28]	Asp_Glu_race
AT5G53430	398.179	90.3502	2.13747	5.23606e-24	4.06758e-23	ATX5	5	4565	Histone-lysine N-methyltransferase ATX5 [Source:UniProtKB/Swiss-Prot;Acc:Q8GZ42]	SET
AT1G65050	92.9507	8.89608	3.45514	5.63134e-24	4.36641e-23	-	1	1053	TRAF-like superfamily protein [Source:TAIR;Acc:AT1G65050]	MATH
AT1G27320	2179.92	1017.39	1.0968	6.09798e-24	4.72526e-23	AHK3	1	4513	HK3 [Source:UniProtKB/TrEMBL;Acc:A0A178WL02]	HATPase_c
AT1G20380	222.833	74.4047	1.56297	6.12e-24	4.74084e-23	-	1	2686	Prolyl oligopeptidase family protein [Source:UniProtKB/TrEMBL;Acc:F4HSS5]	-
AT5G37240	87.2431	4.9293	4.08357	6.75437e-24	5.22898e-23	-	5	1311	unknown protein; Ha. [Source:TAIR;Acc:AT5G37240]	-
AT1G19396	88.7959	11.7896	2.90076	6.78736e-24	5.25123e-23	-	1	707	unknown protein. [Source:TAIR;Acc:AT1G19396]	-
AT5G54090	129.597	34.1489	1.9218	6.97569e-24	5.39524e-23	-	5	2594	DNA mismatch repair protein MutS, type 2 [Source:UniProtKB/TrEMBL;Acc:F4JYU0]	-
AT2G04235	395.628	106.49	1.88638	7.13015e-24	5.51126e-23	-	2	4358	unknown protein; FUNCTIONS IN: molecular_function unknown; INVOLVED IN: biological_process unknown; LOCATED IN: cellular_component unknown; EXPRESSED IN: cultured cell; Ha. [Source:TAIR;Acc:AT2G04235]	-
AT3G14780	155.36	39.5348	1.98898	7.19855e-24	5.56239e-23	-	3	1268	Callose synthase [Source:UniProtKB/TrEMBL;Acc:Q8GW77]	DUF605
AT1G50750	82.6582	5.78436	3.8323	7.63375e-24	5.89315e-23	-	1	1251	Plant mobile domain protein family [Source:TAIR;Acc:AT1G50750]	-
AT5G24000	366.765	85.2605	2.10055	7.66375e-24	5.91446e-23	-	5	1610	Keratin-associated protein (DUF819) [Source:UniProtKB/TrEMBL;Acc:Q9FLW1]	-
AT1G52450	82.8557	4.58531	4.10527	8.26328e-24	6.37317e-23	-	1	3609	F6D8.33 [Source:UniProtKB/TrEMBL;Acc:Q9SSP9]	UCH
AT4G26700	582.31	275.508	1.07658	8.30192e-24	6.40097e-23	FIM1	4	3084	Fimbrin-1 [Source:UniProtKB/Swiss-Prot;Acc:Q7G188]	CH
AT5G64960	1765.84	872.976	1.01456	8.35962e-24	6.43943e-23	CDKC-2	5	2240	Cyclin-dependent kinase C-2 [Source:UniProtKB/Swiss-Prot;Acc:Q8W4P1]	Pkinase
AT5G10946	124.856	18.9123	2.78655	8.57712e-24	6.60286e-23	-	5	1359	unknown protein; FUNCTIONS IN: molecular_function unknown; INVOLVED IN: biological_process unknown; LOCATED IN: endomembrane system; Ha. [Source:TAIR;Acc:AT5G10946]	-
AT5G15110	138.759	25.1642	2.4986	8.80763e-24	6.7782e-23	-	5	1919	Pectate lyase family protein [Source:TAIR;Acc:AT5G15110]	-
AT4G08540	406.721	167.945	1.27246	8.8736e-24	6.82472e-23	-	4	1759	DNA-directed RNA polymerase II protein [Source:UniProtKB/TrEMBL;Acc:Q8H1E1]	-
AT1G08910	756.72	204.146	1.88299	9.18062e-24	7.05646e-23	-	1	2909	zinc ion binding;zinc ion binding [Source:TAIR;Acc:AT1G08910]	zf-MIZ
AT2G37520	587.342	217.094	1.42663	9.39065e-24	7.21117e-23	-	2	3373	Acyl-CoA N-acyltransferase with RING/FYVE/PHD-type zinc finger domain-containing protein [Source:UniProtKB/TrEMBL;Acc:F4IQY0]	PHD
AT4G23350	102.665	10.6023	3.27102	9.41435e-24	7.22712e-23	-	4	1378	Protein of Unknown Function (DUF239) [Source:TAIR;Acc:AT4G23350]	-
AT1G30640	143.718	39.0533	1.88168	9.71335e-24	7.4474e-23	-	1	2658	Non-specific serine/threonine protein kinase [Source:UniProtKB/TrEMBL;Acc:F4I6E4]	Pkinase
novel.215	102.881	8.59283	3.56594	9.85574e-24	7.55189e-23	-	5	1958	- && - && -	-
AT3G13225	702.987	131.366	2.41186	1.02613e-23	7.85778e-23	-	3	3455	WW domain-containing protein [Source:UniProtKB/TrEMBL;Acc:F4JC80]	WW
AT1G76460	659.149	245.232	1.42278	1.05161e-23	8.0454e-23	-	1	2210	RNA-binding (RRM/RBD/RNP motifs) family protein [Source:UniProtKB/TrEMBL;Acc:F4I2E4]	RRM_1
AT4G03440	165.153	46.354	1.81187	1.08986e-23	8.32771e-23	-	4	3067	Ankyrin repeat family protein [Source:UniProtKB/TrEMBL;Acc:Q9ZT72]	-
AT4G19510	820.949	226.404	1.85045	1.13826e-23	8.6868e-23	-	4	4933	Disease resistance protein (TIR-NBS-LRR class) [Source:TAIR;Acc:AT4G19510]	TIR
AT5G14130	99.9706	18.5221	2.44178	1.14281e-23	8.71887e-23	-	5	1438	Peroxidase superfamily protein [Source:TAIR;Acc:AT5G14130]	-
AT1G65230	232.743	92.3122	1.32825	1.15568e-23	8.80887e-23	-	1	1103	Transmembrane protein, putative (DUF2358) [Source:UniProtKB/TrEMBL;Acc:Q8L604]	-
AT1G36340	204.011	64.141	1.68021	1.17795e-23	8.97314e-23	UBC31	1	682	Probable ubiquitin-conjugating enzyme E2 31 [Source:UniProtKB/Swiss-Prot;Acc:Q9C8X7]	UQ_con
AT3G06260	92.0753	8.69235	3.4021	1.22411e-23	9.31901e-23	GATL4	3	2128	Probable galacturonosyltransferase-like 4 [Source:UniProtKB/Swiss-Prot;Acc:Q9M8J2]	Glyco_transf_8
AT2G41210	145.367	23.2387	2.63651	1.22449e-23	9.31905e-23	PIP5K5	2	2863	Phosphatidylinositol 4-phosphate 5-kinase 5 [Source:UniProtKB/Swiss-Prot;Acc:Q9SLG9]	PIP5K
AT1G35490	122.235	14.9917	3.01794	1.24754e-23	9.49152e-23	-	1	1406	BZIP family transcription factor (Fragment) [Source:UniProtKB/TrEMBL;Acc:C0SUZ3]	-
AT3G53920	650.856	216.818	1.57892	1.2743e-23	9.69209e-23	SIGC	3	2222	RNA polymerase sigma factor sigC [Source:UniProtKB/Swiss-Prot;Acc:O24621]	Sigma70_r4
AT1G64570	790.941	128.372	2.61406	1.27649e-23	9.70582e-23	DUO3	1	3975	Homeodomain-like superfamily protein [Source:UniProtKB/TrEMBL;Acc:F4I6S6]	-
AT3G21500	125.967	22.6953	2.43897	1.35625e-23	1.03059e-22	DXPS1	3	2426	1-deoxy-D-xylulose 5-phosphate synthase 1 [Source:UniProtKB/TrEMBL;Acc:A0A1I9LTC7]	-
AT5G16280	1173.55	358.808	1.70507	1.37149e-23	1.04121e-22	-	5	4412	Tetratricopeptide repeat (TPR)-like superfamily protein [Source:TAIR;Acc:AT5G16280]	-
AT1G48490	850.042	233.783	1.85467	1.38911e-23	1.05427e-22	-	1	4513	Protein kinase superfamily protein [Source:TAIR;Acc:AT1G48490]	Pkinase
AT4G33970	109.801	14.9759	2.88301	1.39954e-23	1.06185e-22	PEX4	4	3108	Pollen-specific leucine-rich repeat extensin-like protein 4 [Source:UniProtKB/Swiss-Prot;Acc:O81765]	-
AT2G39570	3227.96	1601.64	1.01241	1.40174e-23	1.06297e-22	ACR9	2	1840	ACT domain-containing protein ACR9 [Source:UniProtKB/Swiss-Prot;Acc:O80644]	ACT
AT1G50500	1097.4	517.323	1.08154	1.40187e-23	1.06297e-22	HIT1	1	3358	Membrane trafficking VPS53 family protein [Source:TAIR;Acc:AT1G50500]	-
AT1G55110	983.848	401.191	1.28961	1.4654e-23	1.10978e-22	IDD7	1	2160	Protein indeterminate-domain 7 [Source:UniProtKB/Swiss-Prot;Acc:Q8H1F5]	-
AT3G56140	859.366	285.17	1.58643	1.57422e-23	1.19074e-22	RER6	3	3030	Protein RETICULATA-RELATED 6, chloroplastic [Source:UniProtKB/Swiss-Prot;Acc:Q8RWG3]	-
AT5G04770	922.517	422.343	1.12201	1.71147e-23	1.29257e-22	CAT6	5	3025	CAT6 [Source:UniProtKB/TrEMBL;Acc:A0A178UKC8]	-
AT5G43560	1221.11	402.189	1.59804	1.74676e-23	1.31681e-22	TRAF1A	5	4022	TNF receptor-associated factor homolog 1a [Source:UniProtKB/Swiss-Prot;Acc:Q8RY18]	MATH
AT5G38970	288.563	113.979	1.33753	1.81226e-23	1.36535e-22	CYP85A1	5	2047	Cytochrome P450 85A1 [Source:UniProtKB/Swiss-Prot;Acc:Q9FMA5]	p450
AT2G47895	115.122	13.8291	3.10616	1.8401e-23	1.3859e-22	-	2	720	other RNA [Source:TAIR;Acc:AT2G47895]	-
AT5G26180	883.231	314.173	1.48692	2.03362e-23	1.52701e-22	-	5	2792	S-adenosyl-L-methionine-dependent methyltransferases superfamily protein [Source:UniProtKB/TrEMBL;Acc:Q8GYE8]	-
AT4G14350	1032.6	356.379	1.52928	2.06389e-23	1.5488e-22	-	4	2840	Non-specific serine/threonine protein kinase [Source:UniProtKB/TrEMBL;Acc:Q8L7S7]	Pkinase
AT2G42270	1044.87	103.242	3.33338	2.21193e-23	1.65788e-22	BRR2B	2	7160	DExH-box ATP-dependent RNA helicase DExH13 [Source:UniProtKB/Swiss-Prot;Acc:O48534]	Sec63
AT2G28320	898.575	391.412	1.19741	2.28202e-23	1.70833e-22	-	2	2974	Pleckstrin homology (PH) and lipid-binding START domains-containing protein [Source:UniProtKB/TrEMBL;Acc:F4IHT0]	START
AT2G38440	1713.68	798.638	1.0983	2.34231e-23	1.75294e-22	SCAR2	2	4885	Protein SCAR2 [Source:UniProtKB/Swiss-Prot;Acc:Q5XPJ9]	-
AT2G39400	165.359	44.2939	1.91891	2.37963e-23	1.77979e-22	-	2	1507	Alpha/beta-Hydrolases superfamily protein [Source:UniProtKB/TrEMBL;Acc:O80627]	-
AT2G42750	686.332	292.179	1.22549	2.38255e-23	1.78144e-22	-	2	1483	At2g42750/F7D19.25 [Source:UniProtKB/TrEMBL;Acc:Q9SJI1]	DnaJ
AT2G46960	96.3041	3.25198	4.90231	2.46359e-23	1.84147e-22	CYP709B1	2	2082	Cytochrome P450 709B1 [Source:UniProtKB/Swiss-Prot;Acc:Q9ASR3]	p450
AT1G67140	1575.89	434.285	1.85685	2.51317e-23	1.87796e-22	SWEETIE	1	6999	HEAT repeat-containing protein [Source:TAIR;Acc:AT1G67140]	-
AT2G32640	449.74	147.422	1.59811	2.53616e-23	1.89457e-22	-	2	2287	Lycopene beta/epsilon cyclase protein [Source:UniProtKB/TrEMBL;Acc:Q0WVA1]	-
AT2G24120	1478.89	325.02	2.18242	2.58153e-23	1.92788e-22	RPOT3	2	3761	DNA-directed RNA polymerase 3, chloroplastic [Source:UniProtKB/Swiss-Prot;Acc:O24600]	-
AT1G50030	2617.36	536.823	2.28391	2.61657e-23	1.95346e-22	TOR	1	8200	Serine/threonine-protein kinase TOR [Source:UniProtKB/TrEMBL;Acc:A0A178WN52]	PI3_PI4_kinase
AT1G54710	743.134	331.134	1.16161	2.63554e-23	1.96703e-22	ATG18H	1	3499	Autophagy-related protein 18h [Source:UniProtKB/Swiss-Prot;Acc:Q8H1Q5]	-
AT4G10470	355.884	166.325	1.10081	2.64827e-23	1.97593e-22	-	4	1563	AT4g10470/F7L13_50 [Source:UniProtKB/TrEMBL;Acc:Q944H1]	-
AT2G47310	236.564	67.3913	1.80729	2.67066e-23	1.99143e-22	-	2	2080	At2g47310 [Source:UniProtKB/TrEMBL;Acc:Q6AWW6]	RRM_1
AT1G32280	176.137	46.3711	1.95278	2.71708e-23	2.02483e-22	-	1	555	Bifunctional inhibitor/lipid-transfer protein/seed storage 2S albumin superfamily protein [Source:UniProtKB/TrEMBL;Acc:Q9LQN1]	-
AT1G13970	161.209	35.7836	2.14633	2.71808e-23	2.02496e-22	-	1	2226	Beta-hexosaminidase (DUF1336) [Source:UniProtKB/TrEMBL;Acc:Q9XI89]	-
AT3G05370	89.9197	13.7402	2.72766	2.73053e-23	2.0331e-22	AtRLP31	3	2921	Receptor-like protein 31 [Source:UniProtKB/Swiss-Prot;Acc:Q8RX63]	LRRNT_2
AT3G43220	978.542	351.263	1.47377	2.73065e-23	2.0331e-22	SAC3	3	3254	Phosphoinositide phosphatase SAC3 [Source:UniProtKB/Swiss-Prot;Acc:Q7XZU2]	-
AT5G16610	410.539	199.166	1.04869	2.87192e-23	2.13636e-22	-	5	2707	unknown protein; Ha. [Source:TAIR;Acc:AT5G16610]	-
AT1G10870	827.969	326.691	1.33662	2.97603e-23	2.21047e-22	AGD4	1	2832	ARF-GAP domain 4 [Source:TAIR;Acc:AT1G10870]	PH
AT5G23810	159.18	38.7038	2.03109	3.03962e-23	2.25499e-22	AAP7	5	2120	Probable amino acid permease 7 [Source:UniProtKB/Swiss-Prot;Acc:Q9FF99]	Aa_trans
AT2G19450	239.829	89.7225	1.41322	3.1051e-23	2.30219e-22	DGAT1	2	2280	Diacylglycerol O-acyltransferase 1 [Source:UniProtKB/Swiss-Prot;Acc:Q9SLD2]	MBOAT
AT5G01270	1062.7	345.893	1.61393	3.12734e-23	2.31798e-22	CPL2	5	3110	Carboxyl-terminal domain (Ctd) phosphatase-like 2 [Source:UniProtKB/TrEMBL;Acc:F4K802]	NIF
AT2G46610	411.877	160.667	1.36526	3.2414e-23	2.39965e-22	RS31A	2	1805	Serine/arginine-rich splicing factor RS31A [Source:UniProtKB/Swiss-Prot;Acc:Q9ZPX8]	RRM_1
AT5G54280	679.61	130.172	2.37625	3.36447e-23	2.48852e-22	VIII-2	5	4409	Myosin-2 [Source:UniProtKB/Swiss-Prot;Acc:F4K0A6]	Myosin_head
AT5G60280	234.618	78.3951	1.56632	3.38464e-23	2.50194e-22	LECRK18	5	2312	L-type lectin-domain containing receptor kinase I.8 [Source:UniProtKB/Swiss-Prot;Acc:Q9LSR9]	Pkinase
AT2G02960	763.089	306.247	1.32383	3.54155e-23	2.61402e-22	-	2	1711	RING/FYVE/PHD zinc finger superfamily protein [Source:UniProtKB/TrEMBL;Acc:F4IS71]	-
AT1G21650	468.582	164.38	1.49955	3.85797e-23	2.84502e-22	SECA2	1	6019	Protein translocase subunit SecA [Source:UniProtKB/TrEMBL;Acc:F4HY36]	-
AT1G70060	534.196	156.635	1.76201	3.86726e-23	2.85103e-22	SNL4	1	4841	Paired amphipathic helix protein Sin3-like 4 [Source:UniProtKB/Swiss-Prot;Acc:O04539]	PAH
AT2G40640	373.178	155.434	1.26442	4.09441e-23	3.01399e-22	PUB63	2	1862	U-box domain-containing protein 63 [Source:UniProtKB/Swiss-Prot;Acc:Q58FY4]	-
AT1G04730	369.473	119.089	1.62143	4.25669e-23	3.13065e-22	CTF18	1	3257	p-loop containing nucleoside triphosphate hydrolases superfamily protein [Source:UniProtKB/TrEMBL;Acc:F4I5S3]	AAA
AT4G34140	467.076	72.3418	2.67713	4.32536e-23	3.17926e-22	-	4	3369	D111/G-patch domain-containing protein [Source:UniProtKB/TrEMBL;Acc:F4JKK9]	G-patch
AT4G31390	690.16	297.267	1.21352	4.67884e-23	3.43295e-22	ABC1K1	4	2748	AtACDO1 [Source:UniProtKB/TrEMBL;Acc:A0A178V5V0]	ABC1
AT3G26922	283.067	123.751	1.19732	4.68234e-23	3.4345e-22	-	3	1958	F-box/LRR-repeat protein At3g26922 [Source:UniProtKB/Swiss-Prot;Acc:Q9LJF8]	F-box
AT5G43510	272.367	0	10.1499	4.84611e-23	3.55252e-22	LURE1.2	5	342	Protein LURE 1.2 [Source:UniProtKB/Swiss-Prot;Acc:Q4VP08]	-
AT2G01980	233.613	69.7422	1.72848	5.28352e-23	3.86744e-22	NHX7	2	3772	Sodium/hydrogen exchanger 7 [Source:UniProtKB/Swiss-Prot;Acc:Q9LKW9]	Na_H_Exchanger
AT2G35450	629.015	310.73	1.02458	5.5616e-23	4.06737e-22	-	2	1825	Catalytic/ hydrolase [Source:UniProtKB/TrEMBL;Acc:Q682E0]	Amidohydro_2
AT4G30067	95.7597	13.7594	2.84295	5.61999e-23	4.10886e-22	LCR63	4	356	Defensin-like protein 173 [Source:UniProtKB/Swiss-Prot;Acc:P82777]	-
AT4G30900	298.234	122.321	1.28555	5.77764e-23	4.22038e-22	-	4	1706	DNAse I-like superfamily protein [Source:UniProtKB/TrEMBL;Acc:F4JR41]	-
AT5G22760	1159.51	341.307	1.75917	5.80318e-23	4.23778e-22	-	5	5585	PHD finger family protein [Source:UniProtKB/TrEMBL;Acc:F4KBB1]	DDT
AT5G38565	100.83	22.5518	2.17631	5.9726e-23	4.35763e-22	-	5	1599	Probable FBD-associated F-box protein At5g38565 [Source:UniProtKB/Swiss-Prot;Acc:Q3E8L3]	-
AT5G08780	384.251	166.381	1.19864	6.11162e-23	4.45643e-22	-	5	1612	At5g08780 [Source:UniProtKB/TrEMBL;Acc:Q6AWW7]	-
AT3G51390	301.845	139.651	1.116	6.36166e-23	4.63602e-22	PAT10	3	1351	Protein S-acyltransferase 10 [Source:UniProtKB/Swiss-Prot;Acc:Q7XA86]	-
AT1G68890	1129.47	195.928	2.52154	6.47728e-23	4.7175e-22	PHYLLO	1	5468	Protein PHYLLO, chloroplastic [Source:UniProtKB/Swiss-Prot;Acc:Q15KI9]	TPP_enzyme_N
novel.207	444.621	163.632	1.44997	6.54994e-23	4.7648e-22	-	5	4519	- && - && -	-
AT4G36490	88.9619	7.76618	3.47225	6.66067e-23	4.84393e-22	SFH12	4	2126	Phosphatidylinositol/phosphatidylcholine transfer protein SFH12 [Source:UniProtKB/Swiss-Prot;Acc:Q94A34]	CRAL_TRIO_N
AT2G17780	295.59	128.357	1.19936	6.87871e-23	4.99956e-22	MCA2	2	2806	Protein MID1-COMPLEMENTING ACTIVITY 2 [Source:UniProtKB/Swiss-Prot;Acc:Q3EBY6]	-
AT5G49580	577.139	281.232	1.03855	6.93592e-23	5.03965e-22	-	5	2943	Chaperone DnaJ-domain superfamily protein [Source:UniProtKB/TrEMBL;Acc:Q9FGY8]	DnaJ
AT2G21080	88.7908	15.9661	2.48952	7.57077e-23	5.49286e-22	-	2	1529	At2g21080 [Source:UniProtKB/TrEMBL;Acc:Q8L726]	-
AT3G14460	76.7341	5.92337	3.72444	7.76815e-23	5.63276e-22	-	3	4461	Putative disease resistance protein At3g14460 [Source:UniProtKB/Swiss-Prot;Acc:Q9LRR5]	NB-ARC
AT4G12120	223.476	70.7101	1.64985	7.77356e-23	5.63503e-22	SEC1B	4	2420	Protein transport Sec1b [Source:UniProtKB/Swiss-Prot;Acc:Q9SZ77]	Sec1
AT3G20550	781.512	291.802	1.41466	8.1788e-23	5.91851e-22	DDL	3	1387	FHA domain-containing protein DDL [Source:UniProtKB/Swiss-Prot;Acc:Q8W4D8]	FHA
AT5G58830	127.323	32.3038	1.971	8.17898e-23	5.91851e-22	SBT4.8	5	2229	Subtilisin-like protease SBT4.8 [Source:UniProtKB/Swiss-Prot;Acc:Q9FIM6]	Peptidase_S8
AT2G04540	348.529	145.474	1.25463	8.20886e-23	5.93839e-22	KAS	2	1598	3-oxoacyl-[acyl-carrier-protein] synthase [Source:UniProtKB/TrEMBL;Acc:A0A178VUN0]	ketoacyl-synt
AT5G36930	193.746	51.371	1.89292	8.25326e-23	5.96876e-22	-	5	4721	Disease resistance protein (TIR-NBS-LRR class) family [Source:UniProtKB/TrEMBL;Acc:B3H776]	TIR
AT5G66620	160.805	48.4897	1.7312	8.31392e-23	6.01088e-22	DAR6	5	2670	Protein DA1-related 6 [Source:UniProtKB/Swiss-Prot;Acc:Q9FJX8]	LIM
AT1G61690	871.621	246.896	1.81329	8.52015e-23	6.15637e-22	-	1	4074	At1g61690 [Source:UniProtKB/TrEMBL;Acc:Q6NPS1]	FYVE
AT1G58250	1865.1	471.419	1.98136	8.57771e-23	6.19615e-22	SAB	1	8618	HYPERSENSITIVE TO PI STARVATION 4 [Source:UniProtKB/TrEMBL;Acc:F4I9T6]	-
AT4G02760	490.527	127.329	1.93399	8.5807e-23	6.19651e-22	-	4	3283	RNI-like superfamily protein [Source:UniProtKB/TrEMBL;Acc:F4JHU9]	-
AT3G24320	453.752	191.519	1.23488	8.9642e-23	6.46967e-22	MSH1	3	4232	DNA mismatch repair protein MSH1, mitochondrial [Source:UniProtKB/Swiss-Prot;Acc:Q84LK0]	-
AT1G16090	88.3433	12.5155	2.81846	9.51669e-23	6.8644e-22	WAKL7	1	1310	Wall associated kinase-like 7 [Source:UniProtKB/TrEMBL;Acc:F4I2T5]	-
AT1G30200	816.316	402.382	1.0195	9.73438e-23	7.01324e-22	-	1	1796	F-box protein At1g30200 [Source:UniProtKB/Swiss-Prot;Acc:Q9C534]	-
AT2G46915	456.604	197.782	1.20412	9.80537e-23	7.06233e-22	-	2	2312	Protein of unknown function (DUF3754) [Source:TAIR;Acc:AT2G46915]	-
AT1G58055	78.6547	5.94312	3.75587	1.00043e-22	7.20352e-22	-	1	333	Defensin-like protein 117 [Source:UniProtKB/Swiss-Prot;Acc:Q2V4G3]	-
AT5G01950	814.494	186.155	2.12744	1.00724e-22	7.25046e-22	-	5	4134	Leucine-rich repeat protein kinase family protein [Source:TAIR;Acc:AT5G01950]	Pkinase
AT2G43850	174.135	56.5435	1.60864	1.0194e-22	7.3358e-22	ILK1	2	2049	Integrin-linked protein kinase 1 [Source:UniProtKB/Swiss-Prot;Acc:F4IS56]	Pkinase_Tyr
AT5G01400	904.454	338.154	1.41479	1.01978e-22	7.3364e-22	ESP4	5	5032	HEAT repeat-containing protein [Source:UniProtKB/TrEMBL;Acc:Q9M033]	-
AT5G62410	981.009	276.708	1.81926	1.02657e-22	7.37886e-22	SMC2-1	5	4045	Structural maintenance of chromosomes protein 2-1 [Source:UniProtKB/Swiss-Prot;Acc:Q9C5Y4]	SMC_N
AT2G02525	88.0435	4.61851	4.28387	1.03319e-22	7.41776e-22	-	2	207	Transmembrane protein [Source:UniProtKB/TrEMBL;Acc:A0A1P8B2Y0]	-
AT1G35467	119.172	1.90364	5.9468	1.03804e-22	7.45047e-22	RALFL5	1	324	Protein RALF-like 5 [Source:UniProtKB/Swiss-Prot;Acc:A8MQI8]	-
AT3G13790	1654.85	617.016	1.42206	1.04883e-22	7.52567e-22	CWINV1	3	2551	Beta-fructofuranosidase, insoluble isoenzyme CWINV1 [Source:UniProtKB/Swiss-Prot;Acc:Q43866]	-
AT1G21000	418.262	180.359	1.2208	1.16184e-22	8.31244e-22	-	1	1423	At1g21000/F9H16_1 [Source:UniProtKB/TrEMBL;Acc:Q93V70]	-
AT1G58025	837.742	292.63	1.51285	1.16968e-22	8.36609e-22	-	1	2412	DNA-binding bromodomain-containing protein [Source:UniProtKB/TrEMBL;Acc:F4I9P7]	Bromodomain
AT1G23020	134.376	36.6217	1.86093	1.17962e-22	8.43478e-22	FRO3	1	2785	Ferric reduction oxidase 3, mitochondrial [Source:UniProtKB/Swiss-Prot;Acc:F4I4K7]	FAD_binding_8
AT1G77270	1703.17	579.343	1.55239	1.18055e-22	8.43901e-22	-	1	2822	Uncharacterized protein At1g77270 [Source:UniProtKB/TrEMBL;Acc:Q8VY02]	-
AT4G15233	88.9901	10.8851	2.9907	1.21137e-22	8.65681e-22	ABCG42	4	5360	ABC transporter G family member 42 [Source:UniProtKB/Swiss-Prot;Acc:Q7PC82]	ABC2_membrane
AT1G05030	225.43	75.3689	1.58115	1.26144e-22	9.01201e-22	-	1	2412	Probable plastidic glucose transporter 1 [Source:UniProtKB/Swiss-Prot;Acc:Q0WVE9]	Sugar_tr
AT3G30383	111.318	1.89816	5.63606	1.27889e-22	9.13139e-22	-	3	409	Inhibitor/lipid-transfer protein/seed storage 2S albumin superfamily protein (DUF784) [Source:UniProtKB/TrEMBL;Acc:A8MQI1]	-
AT4G30270	580.715	256.881	1.1771	1.3494e-22	9.62926e-22	XTH24	4	1210	Xyloglucan endotransglucosylase/hydrolase protein 24 [Source:UniProtKB/Swiss-Prot;Acc:P24806]	-
AT4G24640	127.266	32.378	1.99018	1.39297e-22	9.93732e-22	APPB1	4	1110	Bnm1 like protein [Source:UniProtKB/TrEMBL;Acc:Q9SB59]	-
AT1G55930	277.731	123.361	1.16133	1.55626e-22	1.10862e-21	CBSDUFCH2	1	2894	DUF21 domain-containing protein At1g55930, chloroplastic [Source:UniProtKB/Swiss-Prot;Acc:Q84R21]	CBS
AT1G30270	885.241	410.739	1.10148	1.61743e-22	1.1512e-21	CIPK23	1	2564	CBL-interacting serine/threonine-protein kinase 23 [Source:UniProtKB/Swiss-Prot;Acc:Q93VD3]	Pkinase
AT5G08440	593.324	195.708	1.59215	1.65051e-22	1.17373e-21	-	5	2918	unknown protein; FUNCTIONS IN: molecular_function unknown; INVOLVED IN: biological_process unknown; LOCATED IN: plasma membrane; EXPRESSED IN: 21 plant structures; EXPRESSED DURING: 13 growth stages; BEST Arabidopsis thaliana protein match is: unkno /.../tein (TAIR:AT5G23490.1); Ha. [Source:TAIR;Acc:AT5G08440]	-
AT3G25440	234.013	90.7154	1.35854	1.69279e-22	1.20276e-21	-	3	1715	Uncharacterized CRM domain-containing protein At3g25440, chloroplastic [Source:UniProtKB/Swiss-Prot;Acc:Q67XL4]	-
AT3G20010	1422.58	348.545	2.02632	1.74635e-22	1.24046e-21	CHR27	3	4687	Helicase-like transcription factor CHR27 [Source:UniProtKB/Swiss-Prot;Acc:Q9LHE4]	SNF2_N
AT1G33980	1359.62	618.936	1.13259	1.81323e-22	1.28649e-21	ATUPF3	1	2303	Smg-4/UPF3 family protein [Source:TAIR;Acc:AT1G33980]	-
AT1G66980	717.061	274.146	1.38066	1.86195e-22	1.3203e-21	SNC4	1	4071	suppressor of npr1-1 constitutive 4 [Source:TAIR;Acc:AT1G66980]	Pkinase_Tyr
AT1G28960	549.482	270.335	1.01545	1.88635e-22	1.33721e-21	ATNUDT15	1	1648	NUDX15 [Source:UniProtKB/TrEMBL;Acc:A0A178WAX9]	NUDIX
AT1G61850	769.321	201.275	1.928	1.90878e-22	1.35273e-21	-	1	4912	phospholipases;galactolipases [Source:TAIR;Acc:AT1G61850]	Arm
AT1G34460	89.9458	2.8128	4.95638	1.91388e-22	1.35595e-21	CYCB1;5	1	3984	CYCLIN B1;5 [Source:TAIR;Acc:AT1G34460]	-
AT1G76630	922.087	313.434	1.55271	2.03828e-22	1.44246e-21	SKI3	1	3835	Tetratricopeptide repeat protein SKI3 [Source:UniProtKB/Swiss-Prot;Acc:F4I3Z5]	-
AT2G30580	441.07	191.167	1.19651	2.05726e-22	1.45504e-21	DRIP2	2	2386	DRIP2 [Source:UniProtKB/TrEMBL;Acc:A0A178VRI3]	-
AT5G09230	314.928	145.42	1.12363	2.05951e-22	1.45621e-21	SRT2	5	1671	sirtuin 2 [Source:TAIR;Acc:AT5G09230]	SIR2
AT2G23900	163.178	48.9592	1.7192	2.09504e-22	1.48006e-21	-	2	1844	Glycoside hydrolase family 28 protein/polygalacturonase family protein [Source:UniProtKB/TrEMBL;Acc:Q1PF10]	-
AT5G61460	519.548	107.454	2.26763	2.10862e-22	1.48923e-21	SMC6B	5	3676	Structural maintenance of chromosomes protein 6B [Source:UniProtKB/Swiss-Prot;Acc:Q9FII7]	-
AT1G34630	266.834	108.453	1.2985	2.15435e-22	1.51935e-21	-	1	1977	At1g34630/F12K21.3 [Source:UniProtKB/TrEMBL;Acc:Q8VZG0]	-
AT5G46410	903.221	429.501	1.07499	2.15674e-22	1.52061e-21	SSP4	5	3070	SCP1-like small phosphatase 4 [Source:UniProtKB/TrEMBL;Acc:F4KHG9]	NIF
AT1G63810	1018.8	468.589	1.11562	2.27729e-22	1.60422e-21	-	1	3801	Nucleolar protein [Source:UniProtKB/TrEMBL;Acc:Q0WVM5]	-
AT3G17450	900.918	402.167	1.15953	2.29277e-22	1.61467e-21	-	3	3374	HAT dimerization domain-containing protein [Source:UniProtKB/TrEMBL;Acc:Q0WQA4]	DUF659
AT3G51740	2499.82	635.381	1.97452	2.41795e-22	1.69992e-21	IMK2	3	3234	Probably inactive leucine-rich repeat receptor-like protein kinase IMK2 [Source:UniProtKB/Swiss-Prot;Acc:Q9SCT4]	Pkinase_Tyr
AT5G45840	86.9497	11.9313	2.83229	2.54982e-22	1.7906e-21	-	5	2764	-	Pkinase_Tyr
AT1G24190	1398.5	342.324	2.02619	2.5884e-22	1.81517e-21	SNL3	1	4577	SIN3-like 3 [Source:TAIR;Acc:AT1G24190]	PAH
AT1G62915	93.2467	14.1935	2.74363	2.60071e-22	1.82323e-21	-	1	693	-	-
AT5G54080	539.466	245.34	1.1454	2.64423e-22	1.85216e-21	HGO	5	2284	Homogentisate 1,2-dioxygenase [Source:UniProtKB/Swiss-Prot;Acc:Q9ZRA2]	-
AT5G19280	710.041	348.184	1.02279	2.88196e-22	2.01354e-21	KAPP	5	2174	Kinase associated protein phosphatase [Source:UniProtKB/TrEMBL;Acc:F4K124]	PP2C
AT1G09050	180.731	69.0191	1.39403	2.9876e-22	2.08559e-21	-	1	3220	Arginine-glutamic acid dipeptide repeat protein [Source:UniProtKB/TrEMBL;Acc:Q8RX35]	-
AT5G49500	271.84	59.0839	2.17872	2.99858e-22	2.09266e-21	SRP-54B	5	1869	Signal recognition particle 54 kDa protein 2 [Source:UniProtKB/Swiss-Prot;Acc:P49966]	-
AT3G62900	1538.13	330.858	2.21351	3.02359e-22	2.10948e-21	-	3	5751	CW-type Zinc Finger [Source:UniProtKB/TrEMBL;Acc:F4IZK5]	zf-CW
AT3G20540	1553.47	659.44	1.23258	3.02439e-22	2.10948e-21	POLGAMMA1	3	3617	Polymerase gamma 1 [Source:UniProtKB/TrEMBL;Acc:F4JEQ3]	3_5_exonuc
AT4G19070	281.324	129.479	1.12335	3.02825e-22	2.11158e-21	-	4	1085	Cadmium-induced protein AS8 [Source:UniProtKB/Swiss-Prot;Acc:P42735]	-
AT1G30460	904.387	449.134	1.00731	3.07172e-22	2.14068e-21	CPSF30	1	3220	30-kDa cleavage and polyadenylation specificity factor 30 [Source:UniProtKB/Swiss-Prot;Acc:A9LNK9]	YTH
AT3G24140	279.497	100.514	1.48427	3.10098e-22	2.16046e-21	FAMA	3	2372	FMA [Source:UniProtKB/TrEMBL;Acc:A0A178VKX8]	HLH
AT4G23540	604.759	198.091	1.60387	3.11815e-22	2.17181e-21	-	4	3596	ARM repeat superfamily protein [Source:UniProtKB/TrEMBL;Acc:F4JNL5]	NUC173
AT1G60930	174.251	40.4588	2.07279	3.28762e-22	2.28856e-21	RECQL4B	1	3876	RECQ helicase L4B [Source:TAIR;Acc:AT1G60930]	Helicase_C
AT5G04220	119.451	15.3082	2.89687	3.31603e-22	2.30769e-21	SYT3	5	2375	Synaptotagmin-3 [Source:UniProtKB/Swiss-Prot;Acc:Q7XA06]	C2
AT4G16892	80.1675	4.81636	3.96757	3.40916e-22	2.37116e-21	-	4	1427	other RNA [Source:TAIR;Acc:AT4G16892]	-
AT3G23900	1498.16	511.695	1.54757	3.45313e-22	2.40039e-21	-	3	3683	RNA recognition motif (RRM)-containing protein [Source:UniProtKB/TrEMBL;Acc:F4J5A7]	RRM_1
AT3G13000	1221.15	598.879	1.02388	3.48467e-22	2.42164e-21	-	3	3216	AT3G13000 protein [Source:UniProtKB/TrEMBL;Acc:Q56W79]	-
AT3G05210	423.368	157.066	1.41722	3.54425e-22	2.46097e-21	ERCC1	3	1800	DNA excision repair protein ERCC-1 [Source:UniProtKB/Swiss-Prot;Acc:Q9MA98]	-
AT3G23930	109.987	19.6256	2.44894	3.66069e-22	2.5411e-21	-	3	1129	Troponin T, skeletal protein [Source:UniProtKB/TrEMBL;Acc:Q9LIR5]	-
AT2G36270	1393.49	594.101	1.22766	3.7459e-22	2.59806e-21	ABI5	2	2109	Basic-leucine zipper (bZIP) transcription factor family protein [Source:TAIR;Acc:AT2G36270]	bZIP_1
AT2G43500	396.288	166.562	1.24478	3.76429e-22	2.60935e-21	-	2	4140	Plant regulator RWP-RK family protein [Source:TAIR;Acc:AT2G43500]	RWP-RK
AT5G26160	666.578	319.804	1.05218	3.78856e-22	2.62544e-21	PMIR2	5	3698	Protein PLASTID MOVEMENT IMPAIRED 1-RELATED 2 [Source:UniProtKB/Swiss-Prot;Acc:Q7Y219]	-
AT1G67890	560.797	205.161	1.44061	3.79548e-22	2.6295e-21	-	1	3649	PAS domain-containing protein tyrosine kinase family protein [Source:UniProtKB/TrEMBL;Acc:F4HVH9]	Pkinase_Tyr
AT5G34905	86.3763	2.96409	4.75026	3.95283e-22	2.73698e-21	-	5	425	Protein of unknown function (DUF784) [Source:TAIR;Acc:AT5G34905]	-
AT1G42470	1222	351.538	1.79418	4.10362e-22	2.83741e-21	-	1	4533	Patched family protein [Source:TAIR;Acc:AT1G42470]	-
AT1G76370	74.459	8.15565	3.15577	4.15043e-22	2.86657e-21	PBL22	1	1817	Probable serine/threonine-protein kinase PBL22 [Source:UniProtKB/Swiss-Prot;Acc:Q9SFX0]	Pkinase
AT2G38185	158.74	40.5275	1.99394	4.27456e-22	2.94982e-21	-	2	2142	RING/U-box superfamily protein [Source:UniProtKB/TrEMBL;Acc:F4IS08]	-
AT1G29630	408.723	145.3	1.4852	4.3023e-22	2.96814e-21	EXO1	1	2763	Exonuclease 1 [Source:UniProtKB/Swiss-Prot;Acc:Q8L6Z7]	XPG_I
AT3G26440	171.786	58.8561	1.5582	4.43904e-22	3.06077e-21	-	3	5981	Transmembrane protein, putative (DUF707) [Source:UniProtKB/TrEMBL;Acc:A0A1I9LLN8]	-
AT2G21740	87.3311	3.45929	4.62246	4.49441e-22	3.09722e-21	EC1.2	2	402	Egg cell-secreted protein 1.2 [Source:UniProtKB/Swiss-Prot;Acc:Q9SJ24]	-
AT1G60505	402.628	92.239	2.11557	4.5139e-22	3.10979e-21	-	1	3013	other RNA [Source:TAIR;Acc:AT1G60505]	-
AT4G00930	425.332	79.8832	2.40127	4.61146e-22	3.17611e-21	CIP4.1	4	3943	COP1-interacting protein 4.1 [Source:UniProtKB/TrEMBL;Acc:F4JHQ0]	-
AT4G02260	500.138	125.695	1.9811	4.61549e-22	3.178e-21	RSH1	4	3397	RSH1 [Source:UniProtKB/TrEMBL;Acc:A0A178V5K1]	-
AT5G11330	856.261	413.976	1.0434	4.80611e-22	3.30649e-21	-	5	1582	At5g11330 [Source:UniProtKB/TrEMBL;Acc:Q9LFM4]	FAD_binding_3
AT3G28770	79.8337	7.94627	3.36166	4.85574e-22	3.3397e-21	-	3	6564	Transmembrane protein, putative (DUF1216) [Source:UniProtKB/TrEMBL;Acc:Q9LH98]	-
AT1G54070	78.338	7.17064	3.46265	5.03819e-22	3.46423e-21	-	1	737	Dormancy-associated protein homolog 4 [Source:UniProtKB/Swiss-Prot;Acc:F4HV65]	-
AT4G34020	471.334	230.371	1.0345	5.0404e-22	3.46478e-21	DJ1C	4	1926	Protein DJ-1 homolog C [Source:UniProtKB/Swiss-Prot;Acc:Q8VY09]	DJ-1_PfpI
AT1G64790	3612.53	1209.63	1.57709	5.08403e-22	3.49381e-21	ILA	1	8762	Protein ILITYHIA [Source:UniProtKB/Swiss-Prot;Acc:F4I893]	-
AT1G31950	82.2999	10.3954	2.95849	5.75432e-22	3.94785e-21	-	1	2454	Terpenoid cyclases/Protein prenyltransferases superfamily protein [Source:TAIR;Acc:AT1G31950]	-
AT2G03150	1871.1	350.551	2.41424	5.82816e-22	3.99629e-21	emb1579	2	4574	Protein SHORT ROOT IN SALT MEDIUM 1 [Source:UniProtKB/Swiss-Prot;Acc:F4IS91]	-
AT1G03365	645.054	243.247	1.40175	5.84497e-22	4.00449e-21	RF4	1	3333	Putative E3 ubiquitin-protein ligase RF4 [Source:UniProtKB/Swiss-Prot;Acc:Q9ZVT8]	-
AT3G28810	77.3886	6.75949	3.45451	5.98013e-22	4.09482e-21	-	3	1639	Mediator of RNA polymerase II transcription subunit-like protein, putative (DUF1216) [Source:UniProtKB/TrEMBL;Acc:Q9LH93]	-
AT3G17712	111.072	18.4925	2.59309	6.1294e-22	4.19238e-21	-	3	2832	unknown protein; FUNCTIONS IN: molecular_function unknown; INVOLVED IN: biological_process unknown; LOCATED IN: cellular_component unknown; CONTAINS InterPro DOMAIN/s: Protein of unknown function DUF1740 (InterPro:IPR013633); BEST Arabidopsis thalia /.../tein match is: unknown protein (TAIR:AT3G17740.1); Ha. [Source:TAIR;Acc:AT3G17712]	-
AT3G20200	230.255	41.4447	2.44715	6.21399e-22	4.24906e-21	-	3	3135	At3g20200 [Source:UniProtKB/TrEMBL;Acc:Q8GWU3]	Pkinase_Tyr
AT1G76780	118.147	18.4517	2.71603	6.38012e-22	4.36025e-21	-	1	6974	HSP20-like chaperones superfamily protein [Source:TAIR;Acc:AT1G76780]	-
AT5G43525	400.103	0.334118	9.98367	6.66627e-22	4.54951e-21	LURE1.5	5	334	Protein LURE 1.5 [Source:UniProtKB/Swiss-Prot;Acc:A8MRC6]	-
AT2G33100	77.8768	9.4084	3.05522	6.71506e-22	4.58028e-21	CSLD1	2	3421	Cellulose synthase-like protein D1 [Source:UniProtKB/Swiss-Prot;Acc:O49323]	-
AT5G27000	188.311	45.5696	2.05977	6.82775e-22	4.65458e-21	KIN14G	5	3346	Kinesin-like protein KIN-14G [Source:UniProtKB/Swiss-Prot;Acc:O81635]	Kinesin
AT1G61180	947.456	420.57	1.16784	6.99057e-22	4.76427e-21	-	1	3414	LRR and NB-ARC domains-containing disease resistance protein [Source:UniProtKB/TrEMBL;Acc:Q2V4G0]	NB-ARC
AT1G35320	652.884	263.321	1.31926	7.01758e-22	4.78136e-21	-	1	2351	unknown protein; BEST Arabidopsis thaliana protein match is: unknown protein (TAIR:AT3G30160.1); Ha. [Source:TAIR;Acc:AT1G35320]	-
AT2G16940	3335.48	1214.75	1.45593	7.10501e-22	4.83825e-21	-	2	2672	Splicing factor, CC1-like protein [Source:UniProtKB/TrEMBL;Acc:F4ILE1]	RRM_1
AT3G57520	14136.4	6025.94	1.22986	8.04562e-22	5.46974e-21	RFS2	3	2797	Probable galactinol--sucrose galactosyltransferase 2 [Source:UniProtKB/Swiss-Prot;Acc:Q94A08]	-
AT4G28710	712.054	137.1	2.36911	8.14225e-22	5.53391e-21	XI-H	4	5230	Myosin-14 [Source:UniProtKB/Swiss-Prot;Acc:F4JM19]	Myosin_head
AT4G18340	306.592	130.88	1.22994	8.40707e-22	5.70918e-21	-	4	1687	Beta-1,3-glucanase-like protein [Source:UniProtKB/TrEMBL;Acc:Q8L837]	Glyco_hydro_17
AT5G28262	102.972	22.2705	2.24299	8.58314e-22	5.82556e-21	-	5	1006	other RNA [Source:TAIR;Acc:AT5G28262]	-
AT5G28320	138.498	17.8925	2.94271	8.77369e-22	5.95162e-21	-	5	2784	unknown protein; BEST Arabidopsis thaliana protein match is: unknown protein (TAIR:AT5G28400.1); Ha. [Source:TAIR;Acc:AT5G28320]	-
AT4G30680	247.896	111.026	1.15304	9.09335e-22	6.16338e-21	-	4	873	Initiation factor eIF-4 gamma, MA3 [Source:UniProtKB/TrEMBL;Acc:Q9SUH8]	-
AT4G35440	565.539	234.963	1.26257	9.12847e-22	6.18549e-21	CLC-E	4	2661	Chloride channel protein [Source:UniProtKB/TrEMBL;Acc:F4JN11]	Voltage_CLC
AT5G65930	1209.28	513.643	1.23262	1.01889e-21	6.8909e-21	ZWI	5	4234	Kinesin-like calmodulin-binding protein (ZWICHEL) [Source:UniProtKB/TrEMBL;Acc:F4JXM5]	Kinesin
novel.74	117.993	25.8133	2.17055	1.04683e-21	7.07592e-21	-	2	2404	- && Q9LUP4.1 RecName: Full=Putative F-box/kelch-repeat protein At3g17540 && PF12937:F-box-like	-
AT4G32090	122.272	2.24722	5.97088	1.08837e-21	7.35065e-21	-	4	375	Beta-1,3-N-Acetylglucosaminyltransferase family protein [Source:UniProtKB/TrEMBL;Acc:O49383]	-
AT5G60553	154.461	35.5336	2.13603	1.09334e-21	7.38219e-21	-	5	390	Defensin-like protein 272 [Source:UniProtKB/Swiss-Prot;Acc:Q2V2W8]	-
AT1G50140	1151.48	281.005	2.03148	1.09619e-21	7.39744e-21	-	1	3469	p-loop containing nucleoside triphosphate hydrolases superfamily protein [Source:UniProtKB/TrEMBL;Acc:F4I4Y6]	AAA
AT1G48840	333.862	133.72	1.31125	1.15351e-21	7.77783e-21	-	1	2638	Heat-inducible transcription repressor (DUF639) [Source:UniProtKB/TrEMBL;Acc:Q8VXZ2]	-
AT5G50330	240.9	98.0486	1.30244	1.19148e-21	8.03171e-21	-	5	1851	At5g50330 [Source:UniProtKB/TrEMBL;Acc:Q0WSU9]	ABC1
AT1G34355	465.278	191.527	1.27857	1.21774e-21	8.20644e-21	PS1	1	4829	FHA domain-containing protein PS1 [Source:UniProtKB/Swiss-Prot;Acc:B7SY83]	FHA
AT1G16710	1313.8	342.439	1.93624	1.22489e-21	8.25239e-21	HAC12	1	6824	Histone acetyltransferase HAC12 [Source:UniProtKB/Swiss-Prot;Acc:Q9FWQ5]	zf-TAZ
AT3G06880	484.4	154.766	1.63545	1.24848e-21	8.40902e-21	-	3	4752	Transducin/WD40 repeat-like superfamily protein [Source:UniProtKB/TrEMBL;Acc:A0A1I9LN87]	-
AT1G65010	2767.26	858.214	1.68716	1.29339e-21	8.69731e-21	-	1	4761	Putative WEB family protein At1g65010, chloroplastic [Source:UniProtKB/Swiss-Prot;Acc:F4I8B9]	-
AT1G80245	290.313	120.498	1.26927	1.36725e-21	9.18395e-21	-	1	1297	At1g80245 [Source:UniProtKB/TrEMBL;Acc:Q0V7R8]	-
AT1G06840	662.062	223.519	1.55919	1.36934e-21	9.1955e-21	-	1	3268	Probable LRR receptor-like serine/threonine-protein kinase At1g06840 [Source:UniProtKB/Swiss-Prot;Acc:C0LGD7]	Pkinase_Tyr
AT3G05750	651.645	243.257	1.41681	1.37737e-21	9.24693e-21	-	3	3536	Serine-rich adhesin for platelets-like protein [Source:UniProtKB/TrEMBL;Acc:F4J8I0]	-
AT5G43710	645.067	285.235	1.18023	1.39604e-21	9.3672e-21	MNS4	5	2426	Alpha-mannosidase I MNS4 [Source:UniProtKB/Swiss-Prot;Acc:Q9FG93]	-
AT1G58200	834.608	326.119	1.35013	1.4021e-21	9.40272e-21	MSL3	1	2749	Mechanosensitive ion channel protein 3, chloroplastic [Source:UniProtKB/Swiss-Prot;Acc:Q8L7W1]	-
AT4G13400	209.326	71.5626	1.5519	1.47754e-21	9.88985e-21	-	4	1542	2-oxoglutarate (2OG) and Fe(II)-dependent oxygenase superfamily protein [Source:UniProtKB/TrEMBL;Acc:F4JT13]	-
AT3G45100	598.096	298.573	1.00033	1.52822e-21	1.02236e-20	PIGA	3	2147	SETH2 [Source:UniProtKB/TrEMBL;Acc:A0A178VAH7]	Glycos_transf_1
AT1G02890	2470	787.183	1.64827	1.58439e-21	1.05936e-20	-	1	4233	AAA-type ATPase family protein [Source:UniProtKB/TrEMBL;Acc:F4HZ82]	AAA
AT4G25650	504.728	241.937	1.05271	1.75464e-21	1.17161e-20	PTC52	4	1981	Protochlorophyllide-dependent translocon component 52, chloroplastic [Source:UniProtKB/Swiss-Prot;Acc:Q8W496]	-
AT1G53350	262.055	71.6241	1.86044	1.78984e-21	1.19382e-20	RPP8L2	1	2999	Probable disease resistance RPP8-like protein 2 [Source:UniProtKB/Swiss-Prot;Acc:P0C8S1]	NB-ARC
AT3G10890	93.138	3.4056	4.72167	1.8347e-21	1.22342e-20	MAN3	3	1368	Mannan endo-1,4-beta-mannosidase 3 [Source:UniProtKB/Swiss-Prot;Acc:Q9SG94]	-
AT4G03290	129.925	35.7694	1.87331	1.85721e-21	1.23809e-20	CML6	4	1093	Calmodulin-like protein 6 [Source:UniProtKB/Swiss-Prot;Acc:Q9ZR02]	-
AT3G11560	1684.53	716.681	1.23018	1.90395e-21	1.26788e-20	-	3	3528	AT3G11560 protein [Source:UniProtKB/TrEMBL;Acc:Q8H0W4]	-
AT1G80810	507.245	143.553	1.81347	1.99871e-21	1.33027e-20	-	1	3306	Tudor/PWWP/MBT superfamily protein [Source:TAIR;Acc:AT1G80810]	-
AT2G13370	1530.34	281.473	2.43907	2.05851e-21	1.36933e-20	CHR5	2	6567	Protein CHROMATIN REMODELING 5 [Source:UniProtKB/Swiss-Prot;Acc:F4IV99]	SNF2_N
AT1G31310	996.009	457.968	1.12573	2.08337e-21	1.38549e-20	-	1	1480	Hydroxyproline-rich glycoprotein family protein [Source:UniProtKB/TrEMBL;Acc:F4I9C1]	-
AT1G76580	637.959	171.129	1.88907	2.19172e-21	1.45637e-20	-	1	3951	Squamosa promoter-binding protein-like (SBP domain) transcription factor family protein [Source:TAIR;Acc:AT1G76580]	SBP
novel.218	128.216	1.65084	6.312	2.21867e-21	1.47389e-20	-	5	474	- && - && -	-
AT4G24260	428.432	195.998	1.1206	2.23207e-21	1.48239e-20	KOR3	4	2536	Endoglucanase 21 [Source:UniProtKB/Swiss-Prot;Acc:Q9STW8]	-
AT1G76040	272.919	105.004	1.36756	2.27161e-21	1.50824e-20	CPK29	1	2528	calcium-dependent protein kinase 29 [Source:TAIR;Acc:AT1G76040]	Pkinase
AT2G04430	92.0794	12.658	2.89719	2.29499e-21	1.52295e-20	NUDT5	2	1712	Nudix hydrolase 5 [Source:UniProtKB/Swiss-Prot;Acc:Q9SJC6]	NUDIX
AT3G20580	154.641	45.7852	1.75119	2.30474e-21	1.52901e-20	COBL10	3	2615	COBRA-like protein 10 [Source:UniProtKB/Swiss-Prot;Acc:Q9LJU0]	-
AT4G21063	78.3668	10.5518	2.92008	2.41625e-21	1.60084e-20	-	4	81	-	-
AT2G28540	1433.13	659.343	1.11765	2.51159e-21	1.66267e-20	-	2	3447	RNA binding (RRM/RBD/RNP motifs) family protein [Source:UniProtKB/TrEMBL;Acc:Q0WQD5]	RRM_1
AT5G08710	286.689	136.656	1.07141	2.59152e-21	1.71421e-20	-	5	1956	RUG1 [Source:UniProtKB/TrEMBL;Acc:A0A178UAH3]	-
AT5G43310	1614.88	421.441	1.93478	2.66175e-21	1.75784e-20	-	5	4354	COP1-interacting protein-like protein [Source:UniProtKB/TrEMBL;Acc:F4K5Y5]	-
AT1G79000	1626.09	408.09	1.99136	2.84108e-21	1.87176e-20	HAC1	1	6214	Histone acetyltransferase of the CBP family 1 [Source:UniProtKB/TrEMBL;Acc:F4IDH2]	zf-TAZ
AT1G17940	382.317	168.371	1.17601	2.91738e-21	1.92101e-20	-	1	2828	At1g17940 [Source:UniProtKB/TrEMBL;Acc:Q9LMT6]	-
AT1G45215	85.7698	2.61222	4.89495	2.97493e-21	1.95734e-20	-	1	549	ECA1 gametogenesis family protein (DUF784) [Source:UniProtKB/TrEMBL;Acc:A7REF1]	-
AT2G18760	460.614	155.86	1.55246	3.00809e-21	1.97863e-20	CHR8	2	5088	chromatin remodeling 8 [Source:TAIR;Acc:AT2G18760]	SNF2_N
AT2G06090	108.36	13.8392	3.01088	3.05665e-21	2.01004e-20	-	2	478	Plant self-incompatibility protein S1 family [Source:UniProtKB/TrEMBL;Acc:Q9ZQ02]	Self-incomp_S1
AT4G33240	1553.16	684.864	1.17785	3.12981e-21	2.05705e-20	FAB1A	4	6519	1-phosphatidylinositol-3-phosphate 5-kinase FAB1A [Source:UniProtKB/Swiss-Prot;Acc:Q0WUR5]	PIP5K
AT1G02770	130.986	36.7883	1.83156	3.1675e-21	2.08072e-20	-	1	1233	UPF0725 protein At1g02770 [Source:UniProtKB/Swiss-Prot;Acc:Q9SRX1]	-
AT1G05470	559.004	248.168	1.16371	3.43549e-21	2.25437e-20	IP5P6	1	3568	CVP2 [Source:UniProtKB/TrEMBL;Acc:A0A178WIE4]	-
AT4G21550	619.35	248.992	1.31268	3.45313e-21	2.26534e-20	VAL3	4	2631	VP1/ABI3-like 3 [Source:TAIR;Acc:AT4G21550]	B3
AT5G26910	709.317	294.851	1.26304	3.53903e-21	2.32046e-20	-	5	3762	TRM8 [Source:UniProtKB/TrEMBL;Acc:A0A384LKQ3]	-
AT3G12020	928.454	245.328	1.91328	3.67106e-21	2.40575e-20	-	3	4880	P-loop containing nucleoside triphosphate hydrolases superfamily protein [Source:UniProtKB/TrEMBL;Acc:F4J8L2]	Kinesin
AT5G19660	709.011	283.216	1.31866	3.74832e-21	2.45443e-20	SBT6.1	5	3503	S1P [Source:UniProtKB/TrEMBL;Acc:A0A178UNR0]	Peptidase_S8
AT2G21380	1203.66	255.863	2.22914	3.87195e-21	2.53404e-20	KIN7M	2	3884	Kinesin-like protein KIN-7M, chloroplastic [Source:UniProtKB/Swiss-Prot;Acc:Q9SJU0]	Kinesin
AT2G27980	1304.8	395.029	1.71969	4.04915e-21	2.64721e-20	-	2	4070	Acyl-CoA N-acyltransferase with RING/FYVE/PHD-type zinc finger domain-containing protein [Source:UniProtKB/TrEMBL;Acc:F4IHN9]	-
AT3G29100	252.754	69.9916	1.84689	4.06318e-21	2.65568e-20	VTI13	3	1751	Vesicle transport v-SNARE 13 [Source:UniProtKB/Swiss-Prot;Acc:Q9LVP9]	-
AT4G28010	235.202	95.4067	1.30112	4.09178e-21	2.67366e-20	-	4	2929	RPF5 [Source:UniProtKB/TrEMBL;Acc:A0A178UVK0]	-
AT3G26932	1331.6	475.445	1.48227	4.16165e-21	2.7186e-20	DRB3	3	2175	Double-stranded RNA-binding protein 3 [Source:UniProtKB/Swiss-Prot;Acc:Q9LJF5]	-
AT1G54920	1107.75	524.13	1.07717	4.2325e-21	2.76342e-20	-	1	3307	unknown protein; FUNCTIONS IN: molecular_function unknown; INVOLVED IN: biological_process unknown; LOCATED IN: membrane; EXPRESSED IN: 23 plant structures; EXPRESSED DURING: 15 growth stages; Ha. [Source:TAIR;Acc:AT1G54920]	-
AT4G29750	708.394	275.039	1.35992	4.2911e-21	2.80095e-20	-	4	2893	CRS1 / YhbY (CRM) domain-containing protein [Source:UniProtKB/TrEMBL;Acc:F4JNR2]	-
AT5G35210	3705.81	591.313	2.64617	4.34707e-21	2.83598e-20	-	5	6197	metalloendopeptidases;zinc ion binding;DNA binding [Source:TAIR;Acc:AT5G35210]	DDT
AT3G44370	305.828	152.815	1.00519	4.60116e-21	2.997e-20	ALB3L3	3	2085	ALBINO3-like protein 3, mitochondrial [Source:UniProtKB/Swiss-Prot;Acc:Q0WUC5]	-
AT2G40190	487.403	243.886	1.00187	4.63821e-21	3.02034e-20	ALG11	2	1784	Glycosyltransferase (Fragment) [Source:UniProtKB/TrEMBL;Acc:W8PUX5]	Glycos_transf_1
AT2G32900	712.184	310.307	1.19244	4.75555e-21	3.09512e-20	ZW10	2	2649	Centromere/kinetochore protein zw10 homolog [Source:UniProtKB/Swiss-Prot;Acc:O48626]	-
AT3G15220	736.889	223.361	1.71565	4.78643e-21	3.11357e-20	-	3	2605	MAP kinase [Source:UniProtKB/TrEMBL;Acc:Q9LDN6]	Pkinase
AT1G34844	180.405	53.0753	1.76211	5.06451e-21	3.29273e-20	-	1	1646	other RNA [Source:TAIR;Acc:AT1G34844]	-
AT1G50520	94.1457	8.15058	3.41918	5.14058e-21	3.33936e-20	CYP705A27	1	1754	Cytochrome P450, family 705, subfamily A, polypeptide 27 [Source:UniProtKB/TrEMBL;Acc:F4I6I6]	p450
AT2G34170	247.958	89.3721	1.46511	5.14164e-21	3.33936e-20	-	2	2836	Uncharacterized protein At2g34170 [Source:UniProtKB/TrEMBL;Acc:Q8RYE0]	-
AT2G12170	90.5394	9.03475	3.2871	5.20955e-21	3.3817e-20	-	2	707	BEST Arabidopsis thaliana protein match is: Transcriptional factor B3 family protein (TAIR:AT2G24645.1); Ha. [Source:TAIR;Acc:AT2G12170]	-
AT1G59835	107.014	15.9144	2.69842	5.27487e-21	3.42319e-20	CEP2	1	477	Precursor of CEP2 [Source:UniProtKB/Swiss-Prot;Acc:Q3ECM0]	-
AT1G59124	160.513	29.7707	2.40266	5.35326e-21	3.47316e-20	RDL5	1	4090	Probable disease resistance protein RF45 [Source:UniProtKB/Swiss-Prot;Acc:F4IBE4]	NB-ARC
AT4G21660	2881.94	1298.56	1.14846	5.65193e-21	3.66501e-20	-	4	2650	proline-rich spliceosome-associated (PSP) family protein [Source:TAIR;Acc:AT4G21660]	-
AT3G53680	344.075	140.408	1.28498	5.78402e-21	3.74771e-20	-	3	3413	Acyl-CoA N-acyltransferase with RING/FYVE/PHD-type zinc finger domain-containing protein [Source:UniProtKB/TrEMBL;Acc:A0A1I9LNX5]	PHD
AT3G43610	1097.78	418.107	1.38868	6.11337e-21	3.95593e-20	-	3	3992	Spc97 / Spc98 family of spindle pole body (SBP) component [Source:UniProtKB/TrEMBL;Acc:A0A1I9LLJ3]	-
AT5G38710	100.338	21.68	2.24581	6.15736e-21	3.98335e-20	POX2	5	2067	Proline dehydrogenase 2, mitochondrial [Source:UniProtKB/Swiss-Prot;Acc:Q6NKX1]	-
AT5G40240	276.92	120.983	1.18535	6.18673e-21	4.00026e-20	-	5	2191	WAT1-related protein [Source:UniProtKB/TrEMBL;Acc:F4KHA9]	DUF6
AT2G46020	4250.89	1127.13	1.91407	6.33593e-21	4.09458e-20	BRM	2	7578	ATP-dependent helicase BRM [Source:UniProtKB/Swiss-Prot;Acc:Q6EVK6]	SNF2_N
AT4G33500	639.83	239.379	1.4129	6.33838e-21	4.0951e-20	-	4	2526	Probable protein phosphatase 2C 62 [Source:UniProtKB/Swiss-Prot;Acc:Q93V88]	SpoIIE
AT4G38350	3306.02	1135.89	1.53995	6.51089e-21	4.20436e-20	-	4	4238	Patched family protein [Source:UniProtKB/TrEMBL;Acc:F4JTN1]	-
AT5G14210	1656.38	577.067	1.51819	6.76602e-21	4.3634e-20	-	5	4125	Leucine-rich repeat protein kinase family protein [Source:TAIR;Acc:AT5G14210]	Pkinase
AT5G47820	2414.24	626.32	1.94488	6.85825e-21	4.42058e-20	KIN4A	5	4066	Kinesin-like protein KIN-4A [Source:UniProtKB/Swiss-Prot;Acc:Q8GS71]	Kinesin
AT4G00350	83.6692	14.5477	2.55287	6.91188e-21	4.45398e-20	DTX34	4	1948	Protein DETOXIFICATION 34 [Source:UniProtKB/Swiss-Prot;Acc:F4JH46]	MatE
AT1G61560	816.509	401.483	1.02176	7.27426e-21	4.68018e-20	MLO6	1	2856	MLO-like protein 6 [Source:UniProtKB/Swiss-Prot;Acc:Q94KB7]	-
AT2G25730	1311.76	228.843	2.51496	7.27867e-21	4.6818e-20	-	2	8310	unknown protein; Ha. [Source:TAIR;Acc:AT2G25730]	-
AT5G10800	925.043	215.286	2.09699	7.36588e-21	4.73666e-20	-	5	3633	Protein RRC1-like [Source:UniProtKB/Swiss-Prot;Acc:F4KIA8]	RRM_1
AT3G06210	343.332	157.004	1.13103	7.81962e-21	5.02452e-20	-	3	2881	ARM repeat superfamily protein [Source:UniProtKB/TrEMBL;Acc:Q9M8J7]	-
AT5G02690	126.668	21.6018	2.5367	7.9077e-21	5.0798e-20	-	5	360	At5g02690 [Source:UniProtKB/TrEMBL;Acc:Q6NNM9]	-
AT3G55640	215.601	79.8485	1.41848	7.91072e-21	5.08041e-20	-	3	2247	Ca-dependent solute carrier-like protein [Source:UniProtKB/TrEMBL;Acc:Q9M058]	Mito_carr
AT3G09560	1077.09	415.076	1.37144	7.92042e-21	5.08532e-20	PAH1	3	3914	Phosphatidate phosphatase PAH1 [Source:UniProtKB/Swiss-Prot;Acc:Q9SF47]	-
AT1G77460	885.653	341.751	1.36969	8.04182e-21	5.15791e-20	CSI3	1	7274	Protein CELLULOSE SYNTHASE INTERACTIVE 3 [Source:UniProtKB/Swiss-Prot;Acc:F4I718]	C2
AT1G12700	147.817	38.2861	1.91796	8.04694e-21	5.15985e-20	-	1	2745	ATP binding;nucleic acid binding;helicases [Source:TAIR;Acc:AT1G12700]	-
AT4G16957	87.4968	9.50873	3.1469	8.10265e-21	5.19288e-20	-	4	1473	SUPPRESSOR OF, CONSTITUTIVE protein [Source:UniProtKB/TrEMBL;Acc:A0A1P8B3D3]	-
AT5G27100	141.558	45.6441	1.63007	8.14994e-21	5.22048e-20	GLR2.1	5	2940	Glutamate receptor 2.1 [Source:UniProtKB/Swiss-Prot;Acc:O04660]	ANF_receptor
AT4G24460	279.05	97.6354	1.50975	8.60916e-21	5.5075e-20	CLT2	4	1821	Protein CLT2, chloroplastic [Source:UniProtKB/Swiss-Prot;Acc:A1L4X0]	-
AT4G02400	1126.02	287.212	1.96682	8.69014e-21	5.55643e-20	-	4	2726	U3 ribonucleoprotein (Utp) family protein [Source:UniProtKB/TrEMBL;Acc:F4JHI1]	Utp14
AT1G73960	1378.17	390.761	1.81474	8.8794e-21	5.6745e-20	TAF2	1	4790	Transcription initiation factor TFIID subunit 2 [Source:UniProtKB/Swiss-Prot;Acc:Q8LPF0]	-
AT4G11990	127.556	37.2129	1.7907	8.98596e-21	5.74112e-20	-	4	2084	At4g11990 [Source:UniProtKB/TrEMBL;Acc:Q4V3B0]	-
AT2G19950	938.823	336.769	1.4732	9.12952e-21	5.83134e-20	GC1	2	3058	GC1 [Source:UniProtKB/TrEMBL;Acc:A0A178VUM2]	-
AT2G40930	1269.86	626.088	1.01648	9.34221e-21	5.96257e-20	UBP5	2	3514	UBP5 [Source:UniProtKB/TrEMBL;Acc:A0A178VRF5]	UCH
AT3G07520	133.248	28.2129	2.21242	1.00047e-20	6.38046e-20	GLR1.4	3	2816	Glutamate receptor 1.4 [Source:UniProtKB/Swiss-Prot;Acc:Q8LGN1]	ANF_receptor
AT1G20720	315.265	70.1317	2.1505	1.00683e-20	6.41772e-20	-	1	4227	RAD3-like DNA-binding helicase protein [Source:TAIR;Acc:AT1G20720]	-
AT4G16960	80.7158	7.44748	3.39253	1.01782e-20	6.48609e-20	-	4	3054	Disease resistance protein (TIR-NBS-LRR class) family [Source:TAIR;Acc:AT4G16960]	TIR
AT1G27595	1554.72	536.68	1.53231	1.0225e-20	6.51419e-20	-	1	4918	CONTAINS InterPro DOMAIN/s: Symplekin tight junction protein C-terminal (InterPro:IPR022075); BEST Arabidopsis thaliana protein match is: HEAT repeat-containing protein (TAIR:AT5G01400.1); Ha. [Source:TAIR;Acc:AT1G27595]	-
AT1G17580	1224.04	368.578	1.72737	1.03907e-20	6.61806e-20	XI-1	1	5142	Myosin-5 [Source:UniProtKB/Swiss-Prot;Acc:Q39160]	Myosin_head
AT4G32820	1101.71	353.798	1.63471	1.05252e-20	6.70202e-20	-	4	6523	Tetratricopeptide repeat (TPR)-like superfamily protein [Source:UniProtKB/TrEMBL;Acc:F4JV60]	-
AT1G12780	1185.84	539.135	1.14175	1.06847e-20	6.80185e-20	UGE1	1	2028	Bifunctional UDP-glucose 4-epimerase and UDP-xylose 4-epimerase 1 [Source:UniProtKB/Swiss-Prot;Acc:Q42605]	-
AT1G21610	773.524	196.189	1.97344	1.07352e-20	6.83223e-20	-	1	3180	Wound-responsive family protein [Source:UniProtKB/TrEMBL;Acc:F4HY28]	-
AT5G22608	171.14	34.7267	2.33452	1.13267e-20	7.19943e-20	-	5	917	unknown protein; FUNCTIONS IN: molecular_function unknown; INVOLVED IN: biological_process unknown; LOCATED IN: chloroplast; BEST Arabidopsis thaliana protein match is: unknown protein (TAIR:AT2G05185.1); Ha. [Source:TAIR;Acc:AT5G22608]	-
AT2G22055	142.519	21.1444	2.79527	1.13958e-20	7.24144e-20	RALFL15	2	650	Protein RALF-like 15 [Source:UniProtKB/Swiss-Prot;Acc:A8MQM7]	-
AT4G19090	114.388	16.8025	2.74999	1.16078e-20	7.37428e-20	-	4	2296	Transmembrane protein, putative (DUF594) [Source:UniProtKB/TrEMBL;Acc:O50072]	-
AT5G07770	667.625	157.331	2.07832	1.17253e-20	7.44512e-20	-	5	3410	Actin-binding FH2 protein [Source:TAIR;Acc:AT5G07770]	FH2
AT4G00590	205.637	83.7344	1.28942	1.19234e-20	7.56896e-20	-	4	1475	Putative threonine aspartase [Source:UniProtKB/Swiss-Prot;Acc:O65268]	Asparaginase_2
AT1G20810	361.3	178.119	1.01934	1.19453e-20	7.58092e-20	FKBP18	1	1156	Peptidyl-prolyl cis-trans isomerase FKBP18, chloroplastic [Source:UniProtKB/Swiss-Prot;Acc:Q9LM71]	FKBP_C
AT4G32970	560.915	161.619	1.78459	1.20954e-20	7.66825e-20	-	4	2299	unknown protein; BEST Arabidopsis thaliana protein match is: unknown protein (TAIR:AT4G32960.1); Ha. [Source:TAIR;Acc:AT4G32970]	-
AT5G28680	72.8999	3.73624	4.13384	1.28021e-20	8.11009e-20	ANX2	5	3139	Receptor-like protein kinase ANXUR2 [Source:UniProtKB/Swiss-Prot;Acc:Q3E8W4]	Pkinase_Tyr
AT5G03770	154.386	51.1494	1.57356	1.42615e-20	9.01612e-20	KDTA	5	1885	Probable 3-deoxy-D-manno-octulosonic acid transferase, mitochondrial [Source:UniProtKB/Swiss-Prot;Acc:Q8VZA5]	-
AT1G80060	205.575	82.7421	1.30261	1.44253e-20	9.11501e-20	-	1	2735	At1g80060 [Source:UniProtKB/TrEMBL;Acc:Q5XEN2]	-
AT3G20190	77.9385	10.5355	2.95017	1.47824e-20	9.33586e-20	PRK4	3	2565	Pollen receptor-like kinase 4 [Source:UniProtKB/Swiss-Prot;Acc:Q9LJY0]	Pkinase_Tyr
AT1G27921	72.1115	4.61253	3.99347	1.49064e-20	9.40941e-20	-	1	3167	other RNA [Source:TAIR;Acc:AT1G27921]	-
AT2G35340	1151.5	247.944	2.21106	1.49395e-20	9.42545e-20	MEE29	2	3449	Probable pre-mRNA-splicing factor ATP-dependent RNA helicase DEAH6 [Source:UniProtKB/Swiss-Prot;Acc:F4IJV4]	DUF1605
AT2G39830	299.327	102.772	1.53752	1.5332e-20	9.66813e-20	DAR2	2	2569	DA1-related protein 2 [Source:TAIR;Acc:AT2G39830]	LIM
AT1G80980	327.543	97.6863	1.75545	1.60505e-20	1.01135e-19	-	1	1491	At1g80980 [Source:UniProtKB/TrEMBL;Acc:Q9SAG2]	-
AT3G58810	122.861	28.3023	2.08391	1.63697e-20	1.03094e-19	MTPA2	3	2176	Metal tolerance protein A2 [Source:UniProtKB/TrEMBL;Acc:Q3EAH9]	-
AT1G54510	668.101	267.023	1.3152	1.6538e-20	1.041e-19	NEK1	1	3284	Serine/threonine-protein kinase Nek1 [Source:UniProtKB/Swiss-Prot;Acc:Q9SLI2]	Pkinase
AT5G45560	366.672	165.143	1.14103	1.69574e-20	1.06713e-19	EDR2L	5	2732	Protein ENHANCED DISEASE RESISTANCE 2-like [Source:UniProtKB/Swiss-Prot;Acc:Q8VZF6]	START
AT5G42690	225.748	65.0122	1.77644	1.70619e-20	1.07261e-19	-	5	2408	Expressed protein [Source:UniProtKB/TrEMBL;Acc:Q45GG2]	-
AT3G45780	837.001	403.707	1.04895	1.73516e-20	1.09027e-19	PHOT1	3	3646	RPT1 [Source:UniProtKB/TrEMBL;Acc:A0A178VFT4]	Pkinase
AT1G57760	293.987	0.260674	9.53709	1.73963e-20	1.0928e-19	-	1	563	ECA1 gametogenesis family protein (DUF784) [Source:UniProtKB/TrEMBL;Acc:A7RED0]	-
AT1G52320	505.238	246.051	1.03196	1.76409e-20	1.10789e-19	-	1	3356	BZIP protein, putative; 48652-45869 [Source:UniProtKB/TrEMBL;Acc:Q9C824]	-
AT4G15180	2341.61	496.756	2.23493	1.77391e-20	1.11377e-19	ATXR3	4	7855	Histone-lysine N-methyltransferase ATXR3 [Source:UniProtKB/Swiss-Prot;Acc:O23372]	SET
AT3G57980	323.933	105.94	1.59716	1.82203e-20	1.14341e-19	-	3	2179	DNA-binding bromodomain-containing protein [Source:UniProtKB/TrEMBL;Acc:A0A1I9LTJ3]	Bromodomain
AT1G48050	614.231	298.077	1.03645	1.90352e-20	1.19394e-19	KU80	1	2621	ATP-dependent DNA helicase 2 subunit KU80 [Source:UniProtKB/Swiss-Prot;Acc:Q9FQ09]	-
AT5G56870	207.358	66.9783	1.60951	1.91726e-20	1.20225e-19	BGAL4	5	3812	Beta-galactosidase 4 [Source:UniProtKB/Swiss-Prot;Acc:Q9SCV8]	-
AT4G35520	83.2743	15.5672	2.40209	1.92247e-20	1.20491e-19	MLH3	4	3913	MUTL protein homolog 3 [Source:TAIR;Acc:AT4G35520]	-
novel.206	157.772	53.4316	1.57107	1.92915e-20	1.20879e-19	-	5	1627	- && Q9CAF5.1 RecName: Full=ABC transporter I family member 6, chloroplastic; Short=ABC transporter ABCI.6; Short=AtABCI6; AltName: Full=ABC transporter ATPase; AltName: Full=Non-intrinsic ABC protein 7; Short=AtNAP7; AltName: Full=Plastid SufC-like protein; Flags: Precursor && -	-
AT5G12180	69.3543	5.65123	3.58158	2.05514e-20	1.28675e-19	CPK17	5	2183	CPK17 [Source:UniProtKB/TrEMBL;Acc:A0A178URQ6]	Pkinase
AT2G20850	397.927	144.201	1.45876	2.05686e-20	1.28751e-19	SRF1	2	3026	Protein STRUBBELIG-RECEPTOR FAMILY 1 [Source:UniProtKB/Swiss-Prot;Acc:Q06BH3]	Pkinase_Tyr
AT1G17760	882.526	363.207	1.27748	2.15875e-20	1.34992e-19	CSTF77	1	2652	Cleavage stimulation factor subunit 77 [Source:UniProtKB/Swiss-Prot;Acc:Q8GUP1]	-
AT1G32172	77.3011	2.904	4.73551	2.1942e-20	1.37173e-19	-	1	2042	other RNA [Source:TAIR;Acc:AT1G32172]	-
AT5G17930	906.049	337.816	1.419	2.21321e-20	1.38292e-19	-	5	2689	MIF4G domain-containing protein / MA3 domain-containing protein [Source:UniProtKB/TrEMBL;Acc:Q67Z79]	-
AT1G76890	376.763	163.818	1.19882	2.21418e-20	1.38318e-19	GT-2	1	2119	Trihelix transcription factor GT-2 [Source:UniProtKB/Swiss-Prot;Acc:Q39117]	-
AT3G19190	738.317	233.659	1.65465	2.24803e-20	1.40397e-19	ATG2	3	6266	Autophagy-related protein 2 [Source:UniProtKB/Swiss-Prot;Acc:F8S296]	-
AT5G23630	2329.8	1079.2	1.10842	2.29429e-20	1.43141e-19	PDR2	5	4225	Probable manganese-transporting ATPase PDR2 [Source:UniProtKB/Swiss-Prot;Acc:Q9LT02]	E1-E2_ATPase
AT5G45150	104.665	15.5596	2.7153	2.32991e-20	1.4529e-19	RTL3	5	3236	Ribonuclease 3-like protein 3 [Source:UniProtKB/Swiss-Prot;Acc:Q9FKF0]	Ribonuclease_3
AT5G10080	439.151	216.28	1.01637	2.35396e-20	1.46753e-19	-	5	1958	Aspartic proteinase-like protein 1 [Source:UniProtKB/Swiss-Prot;Acc:Q9LX20]	-
AT1G05630	719.786	250.677	1.51379	2.37115e-20	1.47787e-19	AT5PTASE13	1	4079	Endonuclease/exonuclease/phosphatase family protein [Source:TAIR;Acc:AT1G05630]	Exo_endo_phos
AT5G48545	319.552	141.415	1.17676	2.37278e-20	1.47852e-19	HINT3	5	2222	HINT3 [Source:UniProtKB/TrEMBL;Acc:A0A178UAY8]	HIT
AT5G27870	77.8072	5.7354	3.68252	2.39132e-20	1.48969e-19	PME28	5	2543	Putative pectinesterase/pectinesterase inhibitor 28 [Source:UniProtKB/Swiss-Prot;Acc:Q3E8Z8]	-
AT2G40690	256.898	114.015	1.17094	2.44222e-20	1.52026e-19	GLY1	2	1745	Glycerol-3-phosphate dehydrogenase [NAD(+)] 2, chloroplastic [Source:UniProtKB/Swiss-Prot;Acc:Q949Q0]	NAD_Gly3P_dh_C
AT5G18910	71.4023	9.59164	2.88709	2.47838e-20	1.54121e-19	-	5	2113	At5g18910 [Source:UniProtKB/TrEMBL;Acc:Q8GXZ5]	Pkinase_Tyr
AT5G06350	512.123	210.47	1.27819	2.58695e-20	1.60711e-19	-	5	3172	ARM repeat superfamily protein [Source:UniProtKB/TrEMBL;Acc:F4K3T5]	-
AT1G77800	2112.07	547.434	1.94592	2.63777e-20	1.63786e-19	-	1	5291	PHD finger family protein [Source:TAIR;Acc:AT1G77800]	-
AT1G22460	171.815	40.1367	2.08268	2.67494e-20	1.6601e-19	OFUT7	1	2247	O-fucosyltransferase 7 [Source:UniProtKB/Swiss-Prot;Acc:B7ZWR7]	-
AT3G21295	297.432	142.553	1.06103	2.71436e-20	1.68414e-19	-	3	3006	Tudor/PWWP/MBT superfamily protein [Source:UniProtKB/TrEMBL;Acc:F4IXJ0]	PWWP
AT5G24290	207.809	82.2275	1.33472	2.78065e-20	1.72441e-19	MEB2	5	1943	Membrane protein of ER body 2 [Source:UniProtKB/Swiss-Prot;Acc:F4KFS7]	-
AT5G45760	354.42	116.953	1.61206	2.80053e-20	1.7363e-19	-	5	1368	Transducin/WD40 repeat-like superfamily protein [Source:UniProtKB/TrEMBL;Acc:F4KEM4]	WD40
AT1G06250	110.92	25.182	2.12616	2.93212e-20	1.81697e-19	-	1	1481	Phospholipase A1-IIalpha [Source:UniProtKB/Swiss-Prot;Acc:Q9LNC2]	Lipase_3
AT1G51110	605.598	222.256	1.45523	2.93632e-20	1.81912e-19	PAP12	1	1490	Probable plastid-lipid-associated protein 12, chloroplastic [Source:UniProtKB/Swiss-Prot;Acc:Q8LAP6]	-
AT5G23430	1048.3	426.565	1.29246	2.97969e-20	1.8446e-19	-	5	3694	Katanin p80 WD40 repeat-containing subunit B1 homolog [Source:UniProtKB/Swiss-Prot;Acc:Q8H0T9]	WD40
novel.51	230.698	37.8942	2.58386	2.99113e-20	1.85029e-19	-	2	1772	- && Q9SJ32.2 PUTATIVE PSEUDOGENE: RecName: Full=Putative F-box/FBD/LRR-repeat protein At2g05300 && PF00646:F-box domain	F-box
AT2G20180	299.471	134.434	1.14265	2.99388e-20	1.85153e-19	PIF1	2	2344	Transcription factor PIF1 [Source:UniProtKB/Swiss-Prot;Acc:Q8GZM7]	HLH
AT4G38780	507.2	81.1518	2.63308	3.10804e-20	1.92117e-19	-	4	7194	Pre-mRNA-processing-splicing factor [Source:TAIR;Acc:AT4G38780]	Mov34
AT4G20920	95.6694	11.9814	2.94566	3.18714e-20	1.96761e-19	-	4	3073	double-stranded RNA-binding domain (DsRBD)-containing protein [Source:TAIR;Acc:AT4G20920]	-
AT3G17980	83.8451	9.41909	3.08714	3.20696e-20	1.97885e-19	CAR4	3	1511	Protein C2-DOMAIN ABA-RELATED 4 [Source:UniProtKB/Swiss-Prot;Acc:Q9LVH4]	C2
AT2G33420	85.4744	2.47321	4.90341	3.27955e-20	2.02264e-19	-	2	3545	Uncharacterized protein At2g33420 [Source:UniProtKB/TrEMBL;Acc:O22792]	-
AT2G04860	106.279	27.6769	1.926	3.34206e-20	2.05965e-19	PCMP-E74	2	2140	Pentatricopeptide repeat-containing protein At2g04860 [Source:UniProtKB/Swiss-Prot;Acc:Q9SJ73]	-
AT1G22310	279.821	98.6003	1.50182	3.35298e-20	2.06586e-19	MBD8	1	1966	Methyl-CpG-binding domain-containing protein 8 [Source:UniProtKB/Swiss-Prot;Acc:Q9LME6]	MBD
AT5G20260	250.973	116.193	1.10026	3.36247e-20	2.07119e-19	-	5	1590	Probable glycosyltransferase At5g20260 [Source:UniProtKB/Swiss-Prot;Acc:Q3E9A4]	-
AT1G55200	645.715	188.063	1.77093	3.5297e-20	2.17204e-19	-	1	3127	Kinase with adenine nucleotide alpha hydrolases-like domain-containing protein [Source:UniProtKB/TrEMBL;Acc:Q9C890]	Pkinase_Tyr
AT1G59620	171.564	42.3506	2.03695	3.59267e-20	2.21023e-19	CW9	1	3021	Disease resistance protein (CC-NBS-LRR class) family [Source:TAIR;Acc:AT1G59620]	NB-ARC
AT5G59650	95.5265	12.7951	2.84074	3.75736e-20	2.3104e-19	-	5	3001	Leucine-rich repeat protein kinase family protein [Source:TAIR;Acc:AT5G59650]	Pkinase
AT3G19050	1323.76	192.023	2.77994	3.80388e-20	2.33842e-19	KIN12D	3	8663	POK2 [Source:UniProtKB/TrEMBL;Acc:A0A178VJB1]	Kinesin
AT4G32160	763.179	274.632	1.46825	3.91605e-20	2.40678e-19	EREL1	4	3190	PX domain-containing protein EREL1 [Source:UniProtKB/Swiss-Prot;Acc:F4JTJ2]	PX
AT5G48790	499.077	223.175	1.16335	4.02525e-20	2.47083e-19	-	5	1324	AT5g48790/K24G6_12 [Source:UniProtKB/TrEMBL;Acc:Q94F50]	-
AT3G59800	286.41	139.603	1.02963	4.16005e-20	2.5523e-19	-	3	1198	At3g59800 [Source:UniProtKB/TrEMBL;Acc:Q9M1Z4]	-
AT5G16180	523.851	137.055	1.92759	4.34051e-20	2.66104e-19	CRS1	5	2458	Chloroplastic group IIA intron splicing facilitator CRS1, chloroplastic [Source:UniProtKB/Swiss-Prot;Acc:Q9LF10]	-
AT5G23480	102.154	12.527	2.95129	4.40089e-20	2.69672e-19	-	5	2530	SWIB/MDM2 domain;Plus-3;GYF [Source:TAIR;Acc:AT5G23480]	-
AT5G24600	240.278	111.734	1.11223	4.43421e-20	2.71579e-19	-	5	1162	At5g24600 [Source:UniProtKB/TrEMBL;Acc:Q9FLU4]	-
AT3G60160	5666.49	2686.58	1.07587	4.74828e-20	2.90599e-19	ABCC9	3	5541	ABC transporter C family member 9 [Source:UniProtKB/Swiss-Prot;Acc:Q9M1C7]	ABC_tran
novel.159	79.989	8.35697	3.34507	4.8206e-20	2.94951e-19	-	4	527	- && Q9M0Y8.2 RecName: Full=Vesicle-fusing ATPase; AltName: Full=N-ethylmaleimide-sensitive fusion protein; AltName: Full=Vesicular-fusion protein NSF && -	-
AT5G51480	482.153	173.497	1.46871	5.01758e-20	3.067e-19	SKS2	5	2402	Monocopper oxidase-like protein SKS2 [Source:UniProtKB/Swiss-Prot;Acc:Q9FHN6]	-
AT1G53790	198.9	54.607	1.8692	5.15118e-20	3.14711e-19	-	1	1946	F-box and associated interaction domains-containing protein [Source:UniProtKB/TrEMBL;Acc:B3H7F2]	F-box
AT1G10760	1401.44	461.75	1.59952	5.40474e-20	3.29713e-19	GWD1	1	5040	Alpha-glucan water dikinase 1, chloroplastic [Source:UniProtKB/Swiss-Prot;Acc:Q9SAC6]	-
AT1G79280	2679.97	440.639	2.6027	5.46083e-20	3.32888e-19	NUA	1	6783	nuclear pore anchor [Source:TAIR;Acc:AT1G79280]	-
AT2G35940	687.591	321.386	1.09171	5.51922e-20	3.36282e-19	BLH1	2	3120	BEL1-like homeodomain protein 1 [Source:UniProtKB/Swiss-Prot;Acc:Q9SJ56]	POX
AT1G23510	76.4886	5.54584	3.73261	5.62663e-20	3.42658e-19	-	1	1109	unknown protein; BEST Arabidopsis thaliana protein match is: Domain of unknown function (DUF220) (TAIR:AT1G23520.1); Ha. [Source:TAIR;Acc:AT1G23510]	-
AT2G01830	531.347	213.616	1.31237	5.80905e-20	3.53331e-19	AHK4	2	4575	Histidine kinase 4 [Source:UniProtKB/Swiss-Prot;Acc:Q9C5U0]	HATPase_c
AT1G05467	73.4845	3.86686	4.24729	6.42675e-20	3.90326e-19	-	1	373	-	-
AT3G16700	216.102	56.3732	1.92033	6.60774e-20	4.00826e-19	FAHD2	3	1645	Probable acylpyruvase FAHD2, mitochondrial [Source:UniProtKB/Swiss-Prot;Acc:Q9LUR3]	FAA_hydrolase
AT3G46200	268.152	120.574	1.16437	6.83692e-20	4.14119e-19	NUDT9	3	2372	Nudix hydrolase 9 [Source:UniProtKB/Swiss-Prot;Acc:Q8VYR2]	-
AT4G02650	78.3267	2.50631	4.92565	7.88205e-20	4.75907e-19	-	4	2241	Putative clathrin assembly protein At4g02650 [Source:UniProtKB/Swiss-Prot;Acc:Q8GX47]	-
AT5G19400	2022.21	908.94	1.15144	7.96741e-20	4.80826e-19	SMG7	5	4062	Protein SMG7 [Source:UniProtKB/Swiss-Prot;Acc:A9QM73]	-
AT5G61940	95.0435	13.5643	2.85756	8.3566e-20	5.0419e-19	-	5	3864	Ubiquitin carboxyl-terminal hydrolase-related protein [Source:TAIR;Acc:AT5G61940]	UCH
AT4G24270	925.881	454.14	1.0225	8.76998e-20	5.28229e-19	EMB140	4	3204	EMBRYO DEFECTIVE 140 [Source:UniProtKB/TrEMBL;Acc:F4JQ75]	RRM_1
AT1G26208	102.417	21.5146	2.2334	8.79507e-20	5.29611e-19	-	1	4383	other RNA [Source:TAIR;Acc:AT1G26208]	-
AT1G54260	372.047	80.1538	2.20135	8.9578e-20	5.39016e-19	-	1	1111	Winged-helix DNA-binding transcription factor family protein [Source:UniProtKB/TrEMBL;Acc:F4HV94]	-
novel.33	360.817	117.539	1.60268	9.00534e-20	5.41613e-19	-	1	3065	- && Q9M2N5.1 RecName: Full=Zinc finger BED domain-containing protein DAYSLEEPER; AltName: Full=Transposase-like protein DAYSLEEPER && PF14372:Domain of unknown function (DUF4413)|PF05699:hAT family C-terminal dimerisation region	hATC
AT1G62280	92.2559	11.7918	3.04279	9.15508e-20	5.50084e-19	SLAH1	1	1493	SLAH1 [Source:UniProtKB/TrEMBL;Acc:A0A178W8P4]	C4dic_mal_tran
AT5G49680	96.4641	25.3215	1.92299	9.4595e-20	5.68237e-19	KIP	5	8329	Protein KINKY POLLEN [Source:UniProtKB/Swiss-Prot;Acc:Q6IMT0]	-
AT2G23142	97.5594	10.7894	3.25376	9.62423e-20	5.77711e-19	SPH10	2	444	S-protein homolog 10 [Source:UniProtKB/Swiss-Prot;Acc:B3H6H8]	Self-incomp_S1
AT4G06980	97.1568	7.93971	3.52269	1.00068e-19	6.00095e-19	-	4	229	-	-
AT3G58220	996.854	363.23	1.45276	1.00559e-19	6.0289e-19	-	3	1903	TRAF-like family protein [Source:TAIR;Acc:AT3G58220]	MATH
AT1G61100	867.866	387.008	1.16192	1.01819e-19	6.103e-19	-	1	2945	CSL1 [Source:UniProtKB/TrEMBL;Acc:F4HRR0]	-
AT1G22860	652.617	203	1.67621	1.04146e-19	6.24094e-19	VPS3	1	3577	Vacuolar sorting protein 39 [Source:TAIR;Acc:AT1G22860]	-
AT3G27870	302.797	109.124	1.47188	1.04404e-19	6.2549e-19	ALA8	3	4310	Probable phospholipid-transporting ATPase 8 [Source:UniProtKB/Swiss-Prot;Acc:Q9LK90]	E1-E2_ATPase
AT4G21120	268.942	118.993	1.16462	1.06219e-19	6.3621e-19	CAT1	4	3588	CAT1 [Source:UniProtKB/TrEMBL;Acc:A0A178UYU0]	-
AT4G16940	73.5252	11.754	2.62777	1.10283e-19	6.59747e-19	-	4	5595	Disease resistance protein (TIR-NBS-LRR class) family [Source:TAIR;Acc:AT4G16940]	TIR
AT2G31340	330.232	158.196	1.05274	1.17496e-19	7.02218e-19	emb1381	2	2744	Embryo defective 1381 [Source:UniProtKB/TrEMBL;Acc:F4IQS9]	-
AT2G24520	345.074	74.2061	2.20935	1.25798e-19	7.50389e-19	AHA5	2	3397	H(+)-ATPase 5 [Source:TAIR;Acc:AT2G24520]	E1-E2_ATPase
AT5G16520	449.712	145.976	1.6184	1.27302e-19	7.59174e-19	-	5	2118	At5g16520 [Source:UniProtKB/TrEMBL;Acc:Q8GUJ0]	-
AT1G18950	1317.83	467.471	1.49136	1.27715e-19	7.61457e-19	-	1	3192	DDT domain superfamily [Source:TAIR;Acc:AT1G18950]	DDT
AT2G43400	762.624	359.787	1.07696	1.28429e-19	7.65523e-19	ETFQO	2	2352	Electron transfer flavoprotein-ubiquinone oxidoreductase, mitochondrial [Source:UniProtKB/Swiss-Prot;Acc:O22854]	-
AT4G24580	144.92	39.6861	1.84815	1.30715e-19	7.78965e-19	REN1	4	3330	Rho GTPase-activating protein REN1 [Source:UniProtKB/Swiss-Prot;Acc:F4JQZ3]	RhoGAP
AT3G53090	471.352	103.365	2.17652	1.32316e-19	7.87934e-19	UPL7	3	3774	E3 ubiquitin-protein ligase UPL7 [Source:UniProtKB/Swiss-Prot;Acc:Q9SCQ2]	HECT
AT4G17020	389.463	157.087	1.30766	1.33523e-19	7.94932e-19	-	4	2092	RNA polymerase II transcription factor B subunit 2 [Source:UniProtKB/TrEMBL;Acc:F4JND0]	-
AT4G19020	913.044	236.51	1.94298	1.42137e-19	8.44791e-19	CMT2	4	4315	DNA (cytosine-5)-methyltransferase CMT2 [Source:UniProtKB/Swiss-Prot;Acc:Q94F87]	DNA_methylase
AT5G65180	538.476	208.097	1.36407	1.44747e-19	8.60095e-19	-	5	2029	ENTH/VHS family protein [Source:UniProtKB/TrEMBL;Acc:Q9FJP7]	-
AT1G65480	180.487	56.4213	1.68131	1.51516e-19	8.99667e-19	FT	1	975	PEBP (phosphatidylethanolamine-binding protein) family protein [Source:TAIR;Acc:AT1G65480]	-
AT5G19210	251.679	121.87	1.04346	1.55832e-19	9.24629e-19	RH58	5	1867	DEAD-box ATP-dependent RNA helicase 58, chloroplastic [Source:UniProtKB/Swiss-Prot;Acc:Q3E9C3]	DEAD
AT5G59980	271.551	102.24	1.39969	1.65767e-19	9.82875e-19	-	5	2385	Polymerase/histidinol phosphatase-like protein [Source:UniProtKB/TrEMBL;Acc:F4JXF0]	-
AT4G25800	197.937	68.6207	1.5101	1.72837e-19	1.02406e-18	CBP60D	4	2272	Calmodulin-binding protein 60 D [Source:UniProtKB/Swiss-Prot;Acc:Q0WVV6]	-
AT5G57740	294.627	127.704	1.19206	1.84042e-19	1.08836e-18	XBAT32	5	2236	XBAT32 [Source:UniProtKB/TrEMBL;Acc:A0A178UH83]	-
AT5G66910	376.277	183.967	1.02859	1.84171e-19	1.08886e-18	-	5	2900	Probable disease resistance protein At5g66910 [Source:UniProtKB/Swiss-Prot;Acc:Q9FKZ0]	NB-ARC
AT4G15730	231.371	56.7683	2.00408	1.91537e-19	1.1316e-18	-	4	3985	At4g15730 [Source:UniProtKB/TrEMBL;Acc:Q8GY51]	zf-CW
AT2G23380	772.363	259.021	1.57181	1.99753e-19	1.17873e-18	CLF	2	3514	Histone-lysine N-methyltransferase CLF [Source:UniProtKB/Swiss-Prot;Acc:P93831]	SET
AT3G07960	179.601	71.3296	1.32463	2.01531e-19	1.18894e-18	PIP5K6	3	3099	PIP5K6 [Source:UniProtKB/TrEMBL;Acc:A0A384KKN2]	PIP5K
AT1G20570	64.8602	5.85233	3.41416	2.04318e-19	1.2048e-18	-	1	3181	Spc97 / Spc98 family of spindle pole body (SBP) component [Source:TAIR;Acc:AT1G20570]	-
AT4G14713	433.554	204.947	1.07456	2.04669e-19	1.20659e-18	TIFY4A	4	2166	Protein TIFY 4A [Source:UniProtKB/Swiss-Prot;Acc:Q7XA73]	Zim
AT1G62610	300.097	105.583	1.49239	2.11278e-19	1.24525e-18	-	1	1690	NAD(P)-binding Rossmann-fold superfamily protein [Source:UniProtKB/TrEMBL;Acc:F4HYU6]	adh_short
AT1G67120	1926.54	371.189	2.37381	2.11394e-19	1.24564e-18	MDN1	1	16614	ATPases;nucleotide binding;ATP binding;nucleoside-triphosphatases;transcription factor binding [Source:TAIR;Acc:AT1G67120]	AAA_5
AT3G62170	722.601	318.606	1.18237	2.14047e-19	1.26097e-18	VGDH2	3	2260	Pectinesterase [Source:UniProtKB/TrEMBL;Acc:A0A178VA70]	-
AT1G54773	64.2671	4.40995	3.8338	2.20464e-19	1.29815e-18	-	1	192	-	-
AT5G63700	655.325	173.205	1.91059	2.21846e-19	1.30598e-18	-	5	2338	Zinc ion binding / DNA binding protein [Source:UniProtKB/TrEMBL;Acc:F4KAT5]	-
AT5G19950	343.049	161.177	1.09179	2.22428e-19	1.30878e-18	-	5	1866	AT5G19950 protein [Source:UniProtKB/TrEMBL;Acc:Q8L502]	-
AT5G38150	1181.28	169.273	2.7986	2.25887e-19	1.32819e-18	PMI15	5	2100	PMI15 [Source:UniProtKB/TrEMBL;Acc:A0A178UJM4]	-
AT1G07743	140.368	50.8027	1.45023	2.29562e-19	1.34916e-18	-	1	810	-	-
AT4G02480	4611.6	1734.34	1.40973	2.38795e-19	1.40208e-18	-	4	4375	AAA-type ATPase family protein [Source:UniProtKB/TrEMBL;Acc:Q0WM93]	AAA
AT3G58940	215.648	79.652	1.41982	2.411e-19	1.41495e-18	-	3	2341	F-box/LRR-repeat protein At3g58940 [Source:UniProtKB/Swiss-Prot;Acc:Q9LXQ8]	F-box
AT2G20597	150.216	0	9.29054	2.58949e-19	1.51789e-18	-	2	404	Plant thionin family protein [Source:UniProtKB/TrEMBL;Acc:A8MS59]	-
AT2G05850	77.4913	4.13392	4.12011	2.61856e-19	1.53457e-18	SCPL38	2	2084	Serine carboxypeptidase-like 38 [Source:UniProtKB/Swiss-Prot;Acc:Q9ZUG3]	Peptidase_S10
AT5G05660	1097.38	436.773	1.32428	2.64863e-19	1.55182e-18	NFXL2	5	3278	NF-X1-type zinc finger protein NFXL2 [Source:UniProtKB/Swiss-Prot;Acc:Q9FFK8]	-
AT1G32490	1506.5	464.04	1.69687	2.74462e-19	1.60692e-18	ESP3	1	3713	ESP3 [Source:UniProtKB/TrEMBL;Acc:A0A178W3A5]	DUF1605
AT4G09150	1730.86	720.996	1.26079	2.79803e-19	1.6378e-18	-	4	3795	T-complex protein 11 [Source:UniProtKB/TrEMBL;Acc:F4JJB2]	-
AT5G04090	642.685	307.791	1.06037	2.83491e-19	1.65782e-18	-	5	2302	Plant protein 1589 of unknown function [Source:TAIR;Acc:AT5G04090]	-
AT1G61400	121.803	34.1348	1.8068	2.87314e-19	1.67938e-18	-	1	3295	S-locus lectin protein kinase family protein [Source:TAIR;Acc:AT1G61400]	Pkinase_Tyr
AT4G27050	538.952	206.213	1.37986	2.93009e-19	1.71186e-18	-	4	2120	F-box protein At4g27050 [Source:UniProtKB/Swiss-Prot;Acc:Q9SZ44]	F-box
AT5G25980	70170.2	30796.6	1.18804	3.00657e-19	1.75458e-18	TGG2	5	1970	Myrosinase 2 [Source:UniProtKB/Swiss-Prot;Acc:Q9C5C2]	Glyco_hydro_1
AT3G08800	187.615	69.1861	1.43367	3.00675e-19	1.75458e-18	SIEL	3	3422	Protein SIEL [Source:UniProtKB/Swiss-Prot;Acc:Q8VZA0]	-
AT3G33530	1986.72	641.248	1.62967	3.05936e-19	1.78485e-18	-	3	4572	Transducin family protein / WD-40 repeat family protein [Source:UniProtKB/TrEMBL;Acc:F4JCM7]	-
AT1G72560	718.954	294.7	1.28116	3.12984e-19	1.82468e-18	PSD	1	4190	Exportin-T [Source:UniProtKB/Swiss-Prot;Acc:Q7PC79]	-
AT3G17060	100.696	24.7441	2.03475	3.17312e-19	1.84817e-18	PME67	3	1356	Probable pectinesterase 67 [Source:UniProtKB/Swiss-Prot;Acc:Q9LSP1]	-
AT2G29525	142.448	39.3931	1.8358	3.2026e-19	1.8649e-18	IPCS3	2	1654	Phosphatidylinositol:ceramide inositolphosphotransferase 3 [Source:UniProtKB/Swiss-Prot;Acc:Q56Y01]	-
AT2G43650	1471.73	600.508	1.28949	3.28303e-19	1.91056e-18	EMB2777	2	2450	Sas10/U3 ribonucleoprotein (Utp) family protein [Source:UniProtKB/TrEMBL;Acc:Q8L3P4]	-
AT1G13220	955.277	197.127	2.27342	3.30308e-19	1.9216e-18	LINC2	1	4047	nuclear matrix constituent protein-related [Source:TAIR;Acc:AT1G13220]	-
AT1G14350	902.827	448.458	1.00741	3.34935e-19	1.94715e-18	MYB124	1	2343	MYB124 [Source:UniProtKB/TrEMBL;Acc:A0A178W3Z3]	-
AT2G47500	961.409	405.133	1.24295	3.3797e-19	1.96433e-18	KIN14I	2	3731	Kinesin-like protein KIN-14I [Source:UniProtKB/Swiss-Prot;Acc:F4IL57]	Kinesin
AT5G08660	547.117	252.554	1.11723	3.46574e-19	2.01339e-18	-	5	2978	D-lactate dehydrogenase (DUF668) [Source:UniProtKB/TrEMBL;Acc:Q9C5B1]	-
AT5G44240	1032.07	479.581	1.10131	3.46999e-19	2.01538e-18	ALA2	5	3902	Phospholipid-transporting ATPase [Source:UniProtKB/TrEMBL;Acc:F4K8T6]	E1-E2_ATPase
AT3G63445	104.594	25.2239	2.05385	3.82268e-19	2.21658e-18	-	3	3704	other RNA [Source:TAIR;Acc:AT3G63445]	-
AT2G26470	332.118	153.964	1.11088	3.8929e-19	2.25571e-18	-	2	1862	At2g26470 [Source:UniProtKB/TrEMBL;Acc:Q8GZ60]	-
AT2G01130	1031.26	271.02	1.9244	4.20501e-19	2.43086e-18	-	2	4009	DExH-box ATP-dependent RNA helicase DExH5, mitochondrial [Source:UniProtKB/Swiss-Prot;Acc:F4IM84]	HA2
AT3G01320	1308.82	303.044	2.10688	4.33625e-19	2.50614e-18	SNL1	3	5037	Paired amphipathic helix protein Sin3-like 1 [Source:UniProtKB/Swiss-Prot;Acc:Q9SRH9]	PAH
novel.139	81.8233	10.5754	2.9807	4.40539e-19	2.54491e-18	-	3	2696	- && - && PF04434:SWIM zinc finger	SWIM
AT3G13100	65.8158	6.04943	3.36234	4.61019e-19	2.66074e-18	ABCC7	3	4969	ABC transporter C family member 7 [Source:UniProtKB/Swiss-Prot;Acc:Q9LK62]	ABC_tran
AT2G26410	82.6882	9.43004	3.13774	4.72628e-19	2.7271e-18	Iqd4	2	2244	IQ-domain 4 [Source:UniProtKB/TrEMBL;Acc:F4IUJ7]	-
AT2G45500	289.005	106.327	1.43871	4.99655e-19	2.87968e-18	-	2	2412	AAA-type ATPase family protein [Source:TAIR;Acc:AT2G45500]	AAA
AT3G62500	124.75	25.1932	2.27525	5.14363e-19	2.96238e-18	-	3	1720	F-box protein RMF [Source:UniProtKB/TrEMBL;Acc:A0A1I9LQ20]	-
AT5G17580	135.4	34.1449	1.97768	5.19611e-19	2.99191e-18	-	5	2803	Phototropic-responsive NPH3 family protein [Source:TAIR;Acc:AT5G17580]	BTB
novel.54	161.483	46.4341	1.79123	5.53677e-19	3.18435e-18	-	2	2773	- && - && -	-
AT3G25013	85.6932	11.0549	2.96624	5.5932e-19	3.21531e-18	-	3	1507	Synaptobrevin family protein [Source:UniProtKB/TrEMBL;Acc:F4J7U3]	-
AT2G23970	68.4791	3.16866	4.41405	5.74755e-19	3.3025e-18	GGP5	2	793	Gamma-glutamyl peptidase 5 [Source:UniProtKB/Swiss-Prot;Acc:O82225]	GATase
AT1G22275	100.149	12.8353	2.95715	5.85446e-19	3.36315e-18	ZYP1B	1	3152	Synaptonemal complex protein 2 [Source:UniProtKB/Swiss-Prot;Acc:P61430]	-
AT5G61910	507.163	199.782	1.33924	5.99683e-19	3.44414e-18	-	5	5483	DCD (Development and Cell Death) domain protein [Source:UniProtKB/TrEMBL;Acc:F4K518]	C2
AT1G03750	204.265	65.1909	1.63824	6.25727e-19	3.59038e-18	SWI2	1	2777	Switch 2 [Source:UniProtKB/Swiss-Prot;Acc:F4I2H2]	SNF2_N
AT2G45100	252.683	91.496	1.46178	6.76984e-19	3.87639e-18	-	2	2237	Cyclin/Brf1-like TBP-binding protein [Source:UniProtKB/TrEMBL;Acc:F4IW19]	-
AT2G43795	110.978	30.5542	1.82703	6.84438e-19	3.91816e-18	-	2	844	unknown protein; BEST Arabidopsis thaliana protein match is: unknown protein (TAIR:AT3G59800.1); Ha. [Source:TAIR;Acc:AT2G43795]	-
AT1G21580	1731.26	331.877	2.38097	7.05407e-19	4.0326e-18	-	1	7852	Zinc finger C-x8-C-x5-C-x3-H type family protein [Source:TAIR;Acc:AT1G21580]	-
AT3G23480	82.2318	2.3693	5.00605	7.15775e-19	4.09092e-18	-	3	1911	Cyclopropane-fatty-acyl-phospholipid synthase [Source:UniProtKB/TrEMBL;Acc:F4J434]	-
AT1G47560	121.957	33.1301	1.85197	7.19533e-19	4.11145e-18	SEC3B	1	3111	Exocyst complex component SEC3B [Source:UniProtKB/Swiss-Prot;Acc:Q9SX86]	-
AT1G17360	585.469	220.096	1.40636	7.22462e-19	4.12723e-18	-	1	3934	F28G4.18 protein [Source:UniProtKB/TrEMBL;Acc:Q9LQI8]	-
AT5G57320	91.8915	12.427	2.82241	7.23872e-19	4.13433e-18	VLN5	5	3554	Villin-5 [Source:UniProtKB/Swiss-Prot;Acc:Q9LVC6]	-
AT1G11960	366.224	132.96	1.45488	7.43261e-19	4.24311e-18	-	1	3408	Hyperosmolality-gated Ca2+ permeable channel 1.3 [Source:UniProtKB/TrEMBL;Acc:A0A097NUP7]	-
AT3G22170	1670.19	756.507	1.13997	7.46881e-19	4.26279e-18	FHY3	3	3340	FHY3 [Source:UniProtKB/TrEMBL;Acc:A0A178VJL5]	FAR1
AT4G03410	164.507	61.242	1.42997	7.70134e-19	4.39246e-18	-	4	2021	Peroxisomal membrane 22 kDa (Mpv17/PMP22) family protein [Source:UniProtKB/TrEMBL;Acc:F4JI90]	Mpv17_PMP22
AT5G67320	1582.33	558.503	1.49933	8.08479e-19	4.60798e-18	HOS15	5	2101	HOS15 [Source:UniProtKB/TrEMBL;Acc:A0A178UQT7]	WD40
AT4G17505	104.019	22.9184	2.13039	8.08919e-19	4.60942e-18	-	4	969	Protein of Unknown Function (DUF239) [Source:TAIR;Acc:AT4G17505]	-
AT3G07980	543.83	198.972	1.44548	8.19748e-19	4.6679e-18	MAP3KE2	3	4740	MAP3K epsilon protein kinase 2 [Source:UniProtKB/Swiss-Prot;Acc:Q9SFB6]	Pkinase
AT1G19720	1155.81	282.608	2.02754	8.97038e-19	5.10213e-18	DYW7	1	3069	Pentatricopeptide repeat-containing protein At1g19720 [Source:UniProtKB/Swiss-Prot;Acc:Q9FXH1]	PPR
AT5G60040	723.69	188.58	1.93151	9.22364e-19	5.24136e-18	NRPC1	5	4817	DNA-directed RNA polymerase subunit [Source:UniProtKB/TrEMBL;Acc:F4JXF8]	-
AT4G04370	163.404	47.7288	1.75427	9.89394e-19	5.61323e-18	PCMP-E99	4	2262	Pentatricopeptide repeat-containing protein At4g04370 [Source:UniProtKB/Swiss-Prot;Acc:Q9XE98]	PPR
AT1G67650	63.1029	6.58572	3.28947	1.01132e-18	5.73366e-18	-	1	2225	Signal recognition particle subunit SRP72 [Source:UniProtKB/TrEMBL;Acc:Q9FXD1]	-
AT1G13570	668.711	297.65	1.16936	1.02235e-18	5.79486e-18	-	1	2003	F-box/FBD/LRR-repeat protein At1g13570 [Source:UniProtKB/Swiss-Prot;Acc:Q9FZ70]	-
AT2G43180	153.251	58.9321	1.3883	1.08858e-18	6.16179e-18	-	2	1820	Phosphoenolpyruvate carboxylase family protein [Source:UniProtKB/TrEMBL;Acc:Q8GYI4]	-
AT1G08520	1649.12	706.833	1.21987	1.10057e-18	6.22681e-18	CHLD	1	2643	Mg-protoporphyrin IX chelatase [Source:UniProtKB/TrEMBL;Acc:A0A178W355]	-
AT5G45060	376.813	175.294	1.09302	1.10338e-18	6.24131e-18	RPS4B	5	4512	Disease resistance protein RPS4B [Source:UniProtKB/Swiss-Prot;Acc:Q9FHF0]	TIR
AT3G01085	69.2727	3.84711	4.16042	1.10364e-18	6.24134e-18	-	3	2489	Protein kinase superfamily protein [Source:UniProtKB/TrEMBL;Acc:A0A1I9LLS7]	Pkinase
AT4G27180	1740.42	764.87	1.18381	1.10957e-18	6.27341e-18	KIN14M	4	2840	Kinesin-like protein KIN-14M [Source:UniProtKB/Swiss-Prot;Acc:P46864]	Kinesin
AT5G65210	62.8869	5.11853	3.53145	1.11669e-18	6.31225e-18	TGA1	5	2955	Transcription factor TGA1 [Source:UniProtKB/Swiss-Prot;Acc:Q39237]	bZIP_1
AT3G11960	1362.29	441.884	1.62163	1.153e-18	6.51454e-18	-	3	4849	Cleavage and polyadenylation specificity factor (CPSF) A subunit protein [Source:UniProtKB/TrEMBL;Acc:Q84R20]	-
AT4G18240	722.735	191.595	1.90829	1.17168e-18	6.61553e-18	SS4	4	3395	Probable starch synthase 4, chloroplastic/amyloplastic [Source:UniProtKB/Swiss-Prot;Acc:Q0WVX5]	Glycos_transf_1
AT1G03920	68.0949	6.09525	3.41327	1.2016e-18	6.78137e-18	-	1	2298	Non-specific serine/threonine protein kinase [Source:UniProtKB/TrEMBL;Acc:F4I2K0]	Pkinase
AT4G39180	210.972	44.4294	2.23016	1.27768e-18	7.20415e-18	SFH2	4	2539	Phosphatidylinositol/phosphatidylcholine transfer protein SFH2 [Source:UniProtKB/Swiss-Prot;Acc:F4JVA9]	CRAL_TRIO_N
AT2G14520	330.619	163.317	1.01404	1.28137e-18	7.22333e-18	CBSDUF3	2	1950	DUF21 domain-containing protein At2g14520 [Source:UniProtKB/Swiss-Prot;Acc:Q9ZQR4]	-
AT1G03160	732.911	283.136	1.36522	1.30555e-18	7.35626e-18	FZL	1	3005	Probable transmembrane GTPase FZO-like, chloroplastic [Source:UniProtKB/Swiss-Prot;Acc:Q1KPV0]	-
AT4G21190	296.211	102.873	1.51989	1.31992e-18	7.43213e-18	EMB1417	4	1313	Pentatricopeptide repeat-containing protein At4g21190 [Source:UniProtKB/Swiss-Prot;Acc:Q8LG95]	-
AT1G02520	431.537	125.482	1.77218	1.34026e-18	7.54154e-18	ABCB11	1	4522	ABC transporter B family member 11 [Source:UniProtKB/Swiss-Prot;Acc:Q9FWX7]	ABC_membrane
AT2G43900	476.921	105.036	2.1773	1.37376e-18	7.7265e-18	-	2	4526	Endonuclease/exonuclease/phosphatase family protein [Source:TAIR;Acc:AT2G43900]	-
AT3G24929	108.659	26.8156	1.99588	1.37715e-18	7.74382e-18	-	3	4656	unknown protein; FUNCTIONS IN: molecular_function unknown; INVOLVED IN: biological_process unknown; LOCATED IN: cellular_component unknown; Ha. [Source:TAIR;Acc:AT3G24929]	-
AT5G46210	2292.99	1033.72	1.14745	1.38016e-18	7.75894e-18	CUL4	5	2739	Cullin-4 [Source:UniProtKB/Swiss-Prot;Acc:Q8LGH4]	Cullin
AT4G12020	570.049	68.1019	3.0561	1.40267e-18	7.88014e-18	WRKY19	4	6672	Probable WRKY transcription factor 19 [Source:UniProtKB/Swiss-Prot;Acc:Q9SZ67]	Pkinase
AT4G00990	757.692	283.907	1.40943	1.48173e-18	8.3111e-18	-	4	3085	Transcription factor jumonji (JmjC) domain-containing protein [Source:UniProtKB/TrEMBL;Acc:Q8VYB9]	JmjC
AT3G56060	612.967	276.622	1.14575	1.48448e-18	8.32463e-18	-	3	2374	AT3g56060/F18O21_20 [Source:UniProtKB/TrEMBL;Acc:Q93ZK1]	-
AT1G49490	207.699	53.3989	1.95412	1.51504e-18	8.49404e-18	-	1	2952	Leucine-rich repeat (LRR) family protein [Source:TAIR;Acc:AT1G49490]	-
novel.144	131.869	45.9439	1.52552	1.57445e-18	8.82113e-18	-	3	1617	- && Q8GXW6.1 RecName: Full=F-box/LRR-repeat protein At3g58930 && PF00646:F-box domain	F-box
AT5G18980	305.277	111.771	1.44827	1.57661e-18	8.83122e-18	-	5	3022	ARM repeat superfamily protein [Source:UniProtKB/TrEMBL;Acc:Q93ZV0]	-
AT3G09920	730.475	284.117	1.35488	1.63579e-18	9.1586e-18	PIP5K9	3	3904	Phosphatidylinositol 4-phosphate 5-kinase 9 [Source:UniProtKB/Swiss-Prot;Acc:Q8L850]	PIP5K
AT5G24830	282.833	130.98	1.10732	1.68007e-18	9.40008e-18	-	5	2617	Pentatricopeptide repeat-containing protein At5g24830 [Source:UniProtKB/Swiss-Prot;Acc:Q8L6Y3]	-
AT2G26890	2094.12	717.376	1.54378	1.71407e-18	9.58601e-18	GRV2	2	8455	DnaJ homolog subfamily C GRV2 [Source:UniProtKB/Swiss-Prot;Acc:F4IVL6]	DnaJ
AT3G20040	210.212	77.279	1.42639	1.74853e-18	9.77649e-18	ATHXK4	3	2177	Phosphotransferase [Source:UniProtKB/TrEMBL;Acc:A0A178VNP2]	-
AT3G54010	1654.36	572.914	1.52765	1.75515e-18	9.81129e-18	PAS1	3	2416	Peptidyl-prolyl cis-trans isomerase PASTICCINO1 [Source:UniProtKB/Swiss-Prot;Acc:Q7DMA9]	FKBP_C
AT3G12810	1189.22	263.116	2.17329	1.77524e-18	9.91688e-18	PIE1	3	6964	Protein PHOTOPERIOD-INDEPENDENT EARLY FLOWERING 1 [Source:UniProtKB/Swiss-Prot;Acc:Q7X9V2]	SNF2_N
AT5G67170	241.817	44.3156	2.41877	2.00271e-18	1.11548e-17	-	5	1522	OTU-containing deubiquitinating enzyme OTU7 isoform i [Source:UniProtKB/TrEMBL;Acc:F4K3M6]	OTU
AT1G52820	68.0211	9.01659	2.91391	2.00349e-18	1.11566e-17	-	1	1354	2-oxoglutarate (2OG) and Fe(II)-dependent oxygenase superfamily protein [Source:UniProtKB/TrEMBL;Acc:Q9C936]	2OG-FeII_Oxy
AT1G15280	2085.46	912.808	1.19047	2.01018e-18	1.11914e-17	-	1	2447	CASC3/Barentsz eIF4AIII binding protein [Source:UniProtKB/TrEMBL;Acc:Q8H1F3]	-
AT2G28620	942.4	315.497	1.57458	2.01146e-18	1.1196e-17	-	2	3622	P-loop containing nucleoside triphosphate hydrolases superfamily protein [Source:TAIR;Acc:AT2G28620]	Kinesin
AT1G72410	1417.55	387.773	1.867	2.04834e-18	1.13935e-17	-	1	4191	COP1-interacting protein-like protein [Source:UniProtKB/TrEMBL;Acc:F4IDB4]	-
AT2G46250	301.051	140.618	1.09684	2.05739e-18	1.14388e-17	-	2	2006	At2g46250/T3F17.10 [Source:UniProtKB/TrEMBL;Acc:O82344]	-
AT4G31020	332.169	162.046	1.02898	2.10199e-18	1.16762e-17	-	4	1748	Alpha/beta-Hydrolases superfamily protein [Source:UniProtKB/TrEMBL;Acc:Q84JV3]	-
AT3G27110	179.633	73.0317	1.30807	2.13348e-18	1.18458e-17	-	3	1586	AT3G27110 protein [Source:UniProtKB/TrEMBL;Acc:Q9LSC4]	Peptidase_M48
AT4G13880	153.629	17.6371	3.09342	2.24622e-18	1.24606e-17	AtRLP48	4	2525	-	LRRNT_2
AT5G60930	1059.44	301.648	1.80864	2.2564e-18	1.25111e-17	-	5	4531	P-loop containing nucleoside triphosphate hydrolases superfamily protein [Source:TAIR;Acc:AT5G60930]	Kinesin
AT3G03030	163.361	64.0277	1.34632	2.30847e-18	1.27944e-17	-	3	1942	F-box/LRR-repeat protein At3g03030 [Source:UniProtKB/Swiss-Prot;Acc:Q9M8U4]	-
AT5G15140	98.2985	20.5269	2.27071	2.33316e-18	1.29284e-17	-	5	1758	Aldose 1-epimerase family protein [Source:UniProtKB/TrEMBL;Acc:Q9LXG7]	Aldose_epim
AT2G46450	544.188	207.341	1.39238	2.34633e-18	1.29984e-17	CNGC12	2	3434	Probable cyclic nucleotide-gated ion channel 12 [Source:UniProtKB/Swiss-Prot;Acc:Q8GWD2]	Ion_trans
AT1G62130	461.841	50.6638	3.17986	2.36003e-18	1.30685e-17	-	1	3468	AAA-type ATPase family protein [Source:UniProtKB/TrEMBL;Acc:F4HX45]	AAA
AT1G64563	75.4273	9.42981	2.89951	2.41308e-18	1.33533e-17	-	1	2921	other RNA [Source:TAIR;Acc:AT1G64563]	-
AT3G17205	1521.14	709.029	1.09962	2.46155e-18	1.36153e-17	UPL6	3	4064	E3 ubiquitin-protein ligase UPL6 [Source:UniProtKB/Swiss-Prot;Acc:Q8RWB8]	HECT
AT4G36410	143.194	28.3543	2.30858	2.51262e-18	1.38948e-17	UBC17	4	631	Probable ubiquitin-conjugating enzyme E2 17 [Source:UniProtKB/Swiss-Prot;Acc:O23239]	UQ_con
AT1G71030	173.951	67.83	1.34538	2.56995e-18	1.41959e-17	ATMYBL2	1	1395	At1g71030/F23N20_2 [Source:UniProtKB/TrEMBL;Acc:Q9C9A5]	Myb_DNA-binding
AT5G35450	198.847	66.9675	1.56451	2.6004e-18	1.43596e-17	RPP8L3	5	4409	Disease resistance RPP8-like protein 3 [Source:UniProtKB/Swiss-Prot;Acc:Q9FJB5]	NB-ARC
AT1G27430	1229.38	363.434	1.75421	2.60076e-18	1.43596e-17	-	1	5078	GYF domain-containing protein [Source:UniProtKB/TrEMBL;Acc:F4HSW8]	-
AT4G00030	453.058	202.637	1.16469	2.62536e-18	1.44923e-17	PAP11	4	724	Probable plastid-lipid-associated protein 11, chloroplastic [Source:UniProtKB/Swiss-Prot;Acc:O81304]	-
AT5G05570	513.67	184.926	1.47009	2.66153e-18	1.46853e-17	-	5	3861	Transducin family protein / WD-40 repeat family protein [Source:UniProtKB/TrEMBL;Acc:Q9FFF8]	-
AT2G24350	231.825	67.6449	1.76715	2.73369e-18	1.50801e-17	-	2	2539	At2g24350 [Source:UniProtKB/TrEMBL;Acc:Q0WPW8]	RRM_1
novel.66	66.3238	6.94506	3.3482	2.79598e-18	1.54134e-17	-	2	2065	- && Q9LE59.1 RecName: Full=Polygalacturonate 4-alpha-galacturonosyltransferase; AltName: Full=Alpha-1,4-galacturonosyltransferase 1; AltName: Full=Galacturonosyltransferase 1; AltName: Full=Like glycosyl transferase 1 && -	-
AT3G17850	2040.84	875.184	1.21992	2.90163e-18	1.59851e-17	IREH1	3	4620	Probable serine/threonine protein kinase IREH1 [Source:UniProtKB/Swiss-Prot;Acc:F4J6F6]	Pkinase
AT1G07300	124.828	30.8793	2.00714	3.04147e-18	1.67406e-17	-	1	1548	josephin protein-related [Source:TAIR;Acc:AT1G07300]	-
AT5G04560	1729.83	410.909	2.07117	3.05537e-18	1.68134e-17	DME	5	7191	Transcriptional activator DEMETER [Source:UniProtKB/Swiss-Prot;Acc:Q8LK56]	-
AT1G63880	244.204	90.4222	1.41686	3.07626e-18	1.69246e-17	RLM1B	1	3511	Disease resistance protein RML1B [Source:UniProtKB/Swiss-Prot;Acc:Q9CAK1]	TIR
AT1G72700	720.015	333.019	1.10887	3.16168e-18	1.73829e-17	ALA5	1	4959	Probable phospholipid-transporting ATPase 5 [Source:UniProtKB/Swiss-Prot;Acc:Q9SGG3]	-
AT1G73990	928.267	273.284	1.75951	3.25211e-18	1.78642e-17	SPPA	1	2456	Serine protease SPPA, chloroplastic [Source:UniProtKB/Swiss-Prot;Acc:Q9C9C0]	Peptidase_S49
AT5G47690	4988.78	1401.34	1.83092	3.2798e-18	1.80123e-17	-	5	5634	Binding protein [Source:UniProtKB/TrEMBL;Acc:B3H5K3]	-
AT3G13400	1788.24	478.034	1.90165	3.29941e-18	1.8116e-17	sks13	3	2142	AT3g13400/MRP15_3 [Source:UniProtKB/TrEMBL;Acc:Q9LJF1]	-
AT2G22530	519.603	180.774	1.51781	3.38109e-18	1.85562e-17	-	2	3255	Alkaline-phosphatase-like family protein [Source:UniProtKB/TrEMBL;Acc:F4IJJ8]	-
AT1G74310	551.231	174.89	1.65083	3.47433e-18	1.90468e-17	CLPB1	1	3362	Chaperone protein ClpB1 [Source:UniProtKB/Swiss-Prot;Acc:P42730]	AAA
AT3G05250	220.709	85.0507	1.39318	3.58123e-18	1.96111e-17	-	3	1115	At3g05250 [Source:UniProtKB/TrEMBL;Acc:Q8GYA2]	zf-C3HC4
AT1G31870	727.17	302.92	1.25786	3.77402e-18	2.06394e-17	-	1	2328	AT1G31870 protein [Source:UniProtKB/TrEMBL;Acc:Q9C6S8]	-
AT1G68862	201.52	90.7155	1.14612	3.77704e-18	2.06513e-17	-	1	1397	unknown protein; FUNCTIONS IN: molecular_function unknown; INVOLVED IN: biological_process unknown; LOCATED IN: cellular_component unknown; Ha. [Source:TAIR;Acc:AT1G68862]	-
AT4G31150	271.097	130.527	1.05287	3.85105e-18	2.10374e-17	-	4	1828	At4g31150 [Source:UniProtKB/TrEMBL;Acc:Q8L9R0]	-
AT2G16730	83.6875	17.1445	2.26883	3.86001e-18	2.10817e-17	BGAL13	2	2991	Beta-galactosidase 13 [Source:UniProtKB/Swiss-Prot;Acc:Q9SCU9]	-
AT2G47020	286.865	133.102	1.10242	3.89247e-18	2.12449e-17	-	2	2023	Peptide chain release factor 1 [Source:TAIR;Acc:AT2G47020]	-
AT4G21820	374.751	157.388	1.24312	3.9199e-18	2.13851e-17	-	4	4244	binding;calmodulin binding [Source:TAIR;Acc:AT4G21820]	CH
AT3G47460	722.76	187.781	1.9387	4.04594e-18	2.20545e-17	ATSMC2	3	4017	Structural maintenance of chromosomes protein [Source:UniProtKB/TrEMBL;Acc:A0A1I9LLC4]	SMC_N
AT5G28690	72.9042	2.34515	5.01127	4.06759e-18	2.21615e-17	-	5	1951	At5g28690 [Source:UniProtKB/TrEMBL;Acc:Q6NQD5]	-
AT5G48620	2193.06	811.071	1.43313	4.1847e-18	2.27945e-17	RPP8L4	5	4194	Probable disease resistance RPP8-like protein 4 [Source:UniProtKB/Swiss-Prot;Acc:Q9FJK8]	NB-ARC
AT1G73607	124.791	0	9.02226	4.36071e-18	2.37324e-17	LCR65	1	479	Defensin-like protein 176 [Source:UniProtKB/Swiss-Prot;Acc:P82779]	-
AT1G09530	249.916	120.411	1.04724	4.42283e-18	2.40598e-17	PIF3	1	2762	Transcription factor PIF3 [Source:UniProtKB/Swiss-Prot;Acc:O80536]	HLH
AT1G29170	1226.62	459.469	1.4128	4.45883e-18	2.42397e-17	SCAR3	1	3691	Protein SCAR3 [Source:UniProtKB/Swiss-Prot;Acc:Q9LP46]	-
AT5G45610	310.894	82.7454	1.89703	4.4607e-18	2.42445e-17	SUV2	5	2406	ATR interacting protein [Source:UniProtKB/TrEMBL;Acc:C8KI33]	-
AT1G19290	418.845	128.104	1.70048	4.48477e-18	2.437e-17	-	1	3394	Putative pentatricopeptide repeat-containing protein At1g19290 [Source:UniProtKB/Swiss-Prot;Acc:Q9LN69]	-
AT4G26630	5709.84	1430.7	1.99598	4.53806e-18	2.46514e-17	-	4	2983	DEK domain-containing chromatin associated protein [Source:UniProtKB/TrEMBL;Acc:Q9SUA1]	-
AT1G04390	380.414	91.2127	2.0474	4.53856e-18	2.46514e-17	-	1	3466	BTB/POZ domain-containing protein At1g04390 [Source:UniProtKB/Swiss-Prot;Acc:P93820]	BTB
AT3G12340	355.958	159.655	1.14795	4.54701e-18	2.46919e-17	FKBP43	3	2031	Peptidyl-prolyl cis-trans isomerase FKBP43 [Source:UniProtKB/Swiss-Prot;Acc:F4J9Q6]	FKBP_C
AT4G10730	837.069	301.246	1.46973	4.56876e-18	2.47991e-17	-	4	2704	Protein kinase superfamily protein [Source:UniProtKB/TrEMBL;Acc:F4JMF4]	Pkinase
AT5G25520	1193.02	454.65	1.38776	4.95157e-18	2.68475e-17	-	5	4222	SPOC domain / Transcription elongation factor S-II protein [Source:TAIR;Acc:AT5G25520]	-
AT2G30800	856.951	353.226	1.27445	5.22201e-18	2.82829e-17	HVT1	2	4942	DExH-box ATP-dependent RNA helicase DExH6 [Source:UniProtKB/Swiss-Prot;Acc:F4INY4]	HA2
AT1G62310	802.204	163.599	2.28902	5.22604e-18	2.82985e-17	-	1	5501	Transcription factor jumonji (JmjC) domain-containing protein (Fragment) [Source:UniProtKB/TrEMBL;Acc:C0SV12]	JmjC
AT5G44740	204.901	82.5546	1.32579	5.28236e-18	2.85972e-17	POLH	5	2587	DNA polymerase eta [Source:UniProtKB/Swiss-Prot;Acc:Q8H2D5]	IMS
AT1G49730	445.453	207.61	1.09339	5.43737e-18	2.94042e-17	-	1	2708	Protein kinase superfamily protein [Source:UniProtKB/TrEMBL;Acc:F4I3D1]	Pkinase
AT4G26190	1972.03	411.352	2.25897	5.44902e-18	2.94543e-17	-	4	4246	Haloacid dehalogenase-like hydrolase (HAD) superfamily protein [Source:UniProtKB/TrEMBL;Acc:F4JU71]	NIF
AT4G25160	146.016	48.1915	1.62633	5.53508e-18	2.99129e-17	PUB35	4	3101	U-box domain-containing protein 35 [Source:UniProtKB/Swiss-Prot;Acc:Q9SW11]	Pkinase_Tyr
AT3G55020	1945.77	884.37	1.13558	5.9128e-18	3.19124e-17	-	3	3372	Ypt/Rab-GAP domain of gyp1p superfamily protein [Source:UniProtKB/TrEMBL;Acc:F4JF82]	TBC
AT4G02030	718.908	310.563	1.20457	5.91855e-18	3.19364e-17	-	4	2782	Vps51/Vps67 family (Components of vesicular transport) protein [Source:UniProtKB/TrEMBL;Acc:F4JH69]	-
AT1G61030	434.711	152.402	1.50937	5.92522e-18	3.19654e-17	-	1	2967	WAPL (Wings apart-like protein regulation of heterochromatin) protein [Source:UniProtKB/TrEMBL;Acc:Q9C951]	-
AT2G27170	1572.54	401.146	1.9685	6.12791e-18	3.303e-17	SMC3	2	4634	Structural maintenance of chromosomes protein 3 [Source:UniProtKB/Swiss-Prot;Acc:Q56YN8]	SMC_N
AT4G02195	197.968	64.4627	1.61297	6.3412e-18	3.41648e-17	SYP42	4	1227	Syntaxin-42 [Source:UniProtKB/Swiss-Prot;Acc:Q9SWH4]	SNARE
AT5G22110	215.796	94.5467	1.18698	6.91724e-18	3.72035e-17	DPB2	5	1979	DNA polymerase epsilon subunit B [Source:UniProtKB/Swiss-Prot;Acc:Q500V9]	-
AT1G24300	1063.69	325.157	1.7074	6.92594e-18	3.72422e-17	-	1	4911	GYF domain-containing protein [Source:UniProtKB/TrEMBL;Acc:F4I983]	-
AT3G26480	86.9429	11.0557	2.95035	7.29856e-18	3.91862e-17	-	3	2458	Transducin family protein / WD-40 repeat family protein [Source:UniProtKB/TrEMBL;Acc:Q9LIM7]	-
AT1G55750	475.86	210.136	1.17866	7.49497e-18	4.0197e-17	TFB1-1	1	2904	General transcription and DNA repair factor IIH subunit TFB1-1 [Source:UniProtKB/Swiss-Prot;Acc:Q3ECP0]	-
AT1G35710	193.211	84.2462	1.19953	7.52557e-18	4.03524e-17	-	1	4127	Probable leucine-rich repeat receptor-like protein kinase At1g35710 [Source:UniProtKB/Swiss-Prot;Acc:Q9LP24]	Pkinase
AT1G18910	113.692	34.2251	1.72372	7.67077e-18	4.11132e-17	-	1	4064	Zinc finger protein BRUTUS-like At1g18910 [Source:UniProtKB/Swiss-Prot;Acc:F4IDY5]	zf-CHY
AT1G26230	170.556	50.7828	1.73958	7.71181e-18	4.13241e-17	CPN60B4	1	2315	Cpn60beta4 [Source:UniProtKB/TrEMBL;Acc:A0A178WH16]	-
AT5G28300	1252.46	565.597	1.14473	7.83661e-18	4.19838e-17	-	5	2552	Trihelix transcription factor GTL2 [Source:UniProtKB/Swiss-Prot;Acc:Q8H181]	-
AT1G08600	1450.67	419.42	1.78735	8.24165e-18	4.41059e-17	ATRX	1	5049	CHR20 [Source:UniProtKB/TrEMBL;Acc:A0A178VZQ9]	SNF2_N
AT4G13330	240.613	99.2208	1.27602	8.37495e-18	4.47999e-17	-	4	2468	At4g13330 [Source:UniProtKB/TrEMBL;Acc:Q9T0K4]	-
AT5G41040	67.0558	2.69753	4.5438	8.45254e-18	4.51856e-17	HHT1	5	1823	Omega-hydroxypalmitate O-feruloyl transferase [Source:UniProtKB/Swiss-Prot;Acc:Q94CD1]	-
AT5G27610	125.803	27.4314	2.16089	8.53162e-18	4.55788e-17	ALY1	5	3433	Protein ALWAYS EARLY 1 [Source:UniProtKB/Swiss-Prot;Acc:Q6A331]	DIRP
AT5G65460	824.828	281.576	1.54668	8.62371e-18	4.60509e-17	KCA2	5	4549	kinesin like protein for actin based chloroplast movement 2 [Source:TAIR;Acc:AT5G65460]	Kinesin
AT5G55300	2590.57	581.772	2.15302	8.71309e-18	4.65081e-17	TOP1ALPHA	5	3249	DNA topoisomerase I alpha [Source:UniProtKB/TrEMBL;Acc:F4K3F4]	-
AT5G03330	339.151	163.694	1.03821	8.99714e-18	4.79828e-17	-	5	2726	At5g03330 [Source:UniProtKB/TrEMBL;Acc:Q9LZF7]	OTU
AT1G22403	86.0616	15.2247	2.50229	9.29222e-18	4.95458e-17	-	1	1141	other RNA [Source:TAIR;Acc:AT1G22403]	-
AT5G38747	75.3467	2.79745	4.57417	9.33848e-18	4.9771e-17	-	5	853	Uncharacterized protein (Fragment) [Source:UniProtKB/TrEMBL;Acc:A0A1P8BHB2]	-
AT3G62010	2185.51	757.9	1.52612	9.46687e-18	5.04009e-17	-	3	4411	Metal ion-binding protein [Source:UniProtKB/TrEMBL;Acc:F4IX22]	-
AT5G22799	61.5276	5.32699	3.49163	9.61002e-18	5.1141e-17	-	5	720	Transmembrane protein (Fragment) [Source:UniProtKB/TrEMBL;Acc:A0A1P8BED0]	-
AT2G15900	839.253	258.321	1.69455	9.70268e-18	5.16119e-17	-	2	3607	Phox domain-containing protein [Source:UniProtKB/TrEMBL;Acc:F4IJE1]	PX
AT1G09753	127.458	34.0657	1.90256	9.71827e-18	5.16837e-17	-	1	246	-	-
AT5G51850	262.767	97.5168	1.41539	9.78743e-18	5.20403e-17	-	5	2355	TRM24 [Source:UniProtKB/TrEMBL;Acc:A0A178UFN7]	-
AT2G14120	1624.03	716.759	1.17774	9.82188e-18	5.22123e-17	DRP3B	2	3007	Dynamin related protein [Source:UniProtKB/TrEMBL;Acc:F4IFG2]	-
AT3G56600	67.8617	6.82117	3.27097	1.00455e-17	5.33779e-17	-	3	2437	Phosphatidylinositol 4-kinase gamma-like protein [Source:UniProtKB/TrEMBL;Acc:A0A1I9LRU9]	PI3_PI4_kinase
AT2G37450	308.443	146.954	1.08018	1.0151e-17	5.39156e-17	-	2	2318	WAT1-related protein [Source:UniProtKB/TrEMBL;Acc:A0A178W1D2]	DUF6
AT4G10550	178.058	58.9936	1.59707	1.13645e-17	6.02573e-17	-	4	2906	Subtilase family protein [Source:TAIR;Acc:AT4G10550]	Peptidase_S8
AT1G78865	254.818	97.3104	1.3875	1.18216e-17	6.26138e-17	-	1	1877	-	-
AT2G47040	1775.49	487.218	1.86411	1.24071e-17	6.56868e-17	PME5	2	2258	Pectinesterase 5 [Source:UniProtKB/Swiss-Prot;Acc:Q5MFV8]	-
AT2G25760	1849.57	688.492	1.42342	1.24199e-17	6.57403e-17	-	2	3316	Protein kinase family protein [Source:UniProtKB/TrEMBL;Acc:F4ISN5]	Pkinase
AT4G02070	756.135	285.445	1.40139	1.26419e-17	6.68868e-17	MSH6	4	4549	DNA mismatch repair protein MSH6 [Source:UniProtKB/Swiss-Prot;Acc:O04716]	-
AT5G16210	1153.41	405.91	1.50388	1.27542e-17	6.74666e-17	-	5	4236	AT5g16210/T21H19_130 [Source:UniProtKB/TrEMBL;Acc:Q8VYW7]	-
AT2G17210	58.7737	4.15127	3.81239	1.28171e-17	6.77831e-17	PCMP-E77	2	2211	Pentatricopeptide repeat-containing protein At2g17210 [Source:UniProtKB/Swiss-Prot;Acc:Q9SII7]	-
AT1G26170	877.563	336.7	1.37708	1.28195e-17	6.77831e-17	-	1	3581	ARM repeat superfamily protein [Source:UniProtKB/TrEMBL;Acc:F4IE40]	-
AT1G69070	1248.65	509.584	1.2899	1.30718e-17	6.90579e-17	-	1	2977	FUNCTIONS IN: molecular_function unknown; INVOLVED IN: biological_process unknown; LOCATED IN: cellular_component unknown; EXPRESSED IN: 23 plant structures; EXPRESSED DURING: 13 growth stages; CONTAINS InterPro DOMAIN/s: Nop14-like protein (InterPr /.../07276); Ha. [Source:TAIR;Acc:AT1G69070]	-
AT4G04180	334.395	163.446	1.03807	1.31583e-17	6.95001e-17	-	4	2173	P-loop containing nucleoside triphosphate hydrolases superfamily protein [Source:TAIR;Acc:AT4G04180]	AAA
AT3G05160	170.595	58.5525	1.56491	1.32618e-17	7.00318e-17	-	3	2157	Sugar transporter ERD6-like 10 [Source:UniProtKB/Swiss-Prot;Acc:Q93Z80]	Sugar_tr
AT1G31540	181.295	55.8026	1.68382	1.41354e-17	7.45651e-17	-	1	4927	Disease resistance protein (TIR-NBS-LRR class) family [Source:UniProtKB/TrEMBL;Acc:F4I9F1]	TIR
AT2G26570	562.819	243.705	1.20601	1.44663e-17	7.62782e-17	WEB1	2	3214	Protein WEAK CHLOROPLAST MOVEMENT UNDER BLUE LIGHT 1 [Source:UniProtKB/Swiss-Prot;Acc:O48724]	-
AT4G27580	82.7904	11.8681	2.8538	1.45106e-17	7.6479e-17	-	4	779	At4g27580 [Source:UniProtKB/TrEMBL;Acc:Q8L9A7]	-
AT5G52882	1732.13	679.012	1.34853	1.46007e-17	7.69211e-17	-	5	3557	P-loop containing nucleoside triphosphate hydrolases superfamily protein [Source:UniProtKB/TrEMBL;Acc:F4KHN5]	AAA
AT1G51300	118.194	30.2314	1.98157	1.46403e-17	7.71134e-17	-	1	1195	alpha/beta-Hydrolases superfamily protein [Source:TAIR;Acc:AT1G51300]	Abhydrolase_2
AT5G37350	905.272	372.884	1.27369	1.48635e-17	7.8239e-17	-	5	2120	Serine/threonine-protein kinase RIO1 [Source:UniProtKB/TrEMBL;Acc:Q9FHT0]	-
AT3G01700	264.951	106.475	1.30448	1.50424e-17	7.91469e-17	AGP11	3	753	ATAGP11 [Source:UniProtKB/TrEMBL;Acc:A0A178VG39]	-
AT1G73890	64.5293	10.526	2.64003	1.5057e-17	7.92069e-17	-	1	582	Bifunctional inhibitor/lipid-transfer protein/seed storage 2S albumin superfamily protein [Source:UniProtKB/TrEMBL;Acc:Q9C9B1]	-
AT5G46470	481.041	111.867	2.09587	1.52065e-17	7.99764e-17	RPS6	5	4997	Disease resistance protein RPS6 [Source:UniProtKB/Swiss-Prot;Acc:F4KHH8]	TIR
AT4G17140	1611.99	376.215	2.09657	1.57669e-17	8.28533e-17	-	4	13366	Pleckstrin homology (PH) domain-containing protein [Source:UniProtKB/TrEMBL;Acc:F4JNE2]	-
AT5G52910	299.745	110.217	1.4296	1.57739e-17	8.28727e-17	ATIM	5	3900	timeless family protein [Source:TAIR;Acc:AT5G52910]	TIMELESS_C
AT1G22260	63.4587	6.05291	3.37476	1.58608e-17	8.32912e-17	ZYP1A	1	3087	Synaptonemal complex protein 1 [Source:UniProtKB/Swiss-Prot;Acc:Q9LME2]	-
AT3G48110	1212.72	338.171	1.8394	1.58637e-17	8.32912e-17	EDD1	3	3527	Glycine--tRNA ligase, chloroplastic/mitochondrial 2 [Source:UniProtKB/Swiss-Prot;Acc:Q8L785]	-
AT5G01290	627.584	280.128	1.15729	1.5934e-17	8.36426e-17	-	5	2374	mRNA capping enzyme family protein [Source:UniProtKB/TrEMBL;Acc:Q8GSD7]	DSPc
AT1G68790	1824.92	502.534	1.85838	1.6281e-17	8.54099e-17	CRWN3	1	3888	Protein CROWDED NUCLEI 3 [Source:UniProtKB/Swiss-Prot;Acc:Q9CA42]	-
AT2G01460	570.913	111.498	2.35012	1.64147e-17	8.60743e-17	-	2	3486	P-loop containing nucleoside triphosphate hydrolases superfamily protein [Source:UniProtKB/TrEMBL;Acc:F4INB5]	-
AT5G55820	874.67	179.054	2.28434	1.65513e-17	8.6754e-17	-	5	5987	Inner centromere protein, ARK-binding region protein [Source:UniProtKB/TrEMBL;Acc:Q9FM57]	-
AT3G07850	1182.76	350.593	1.75239	1.67206e-17	8.75854e-17	-	3	1722	Exopolygalacturonase clone GBGA483 [Source:UniProtKB/Swiss-Prot;Acc:P49063]	-
AT5G61190	1043.76	252.548	2.04267	1.72523e-17	9.02749e-17	-	5	4212	putative endonuclease or glycosyl hydrolase with C2H2-type zinc finger domain [Source:TAIR;Acc:AT5G61190]	DUF88
AT2G27900	1534.93	585.483	1.38764	1.74263e-17	9.11665e-17	-	2	4224	At2g27890 [Source:UniProtKB/TrEMBL;Acc:Q8RXC2]	-
AT1G11160	151.387	57.7062	1.3884	1.86396e-17	9.73489e-17	-	1	4267	Katanin p80 WD40 repeat-containing subunit B1 homolog [Source:UniProtKB/TrEMBL;Acc:F4I7E1]	WD40
AT4G11670	474.895	169.062	1.48126	1.88743e-17	9.85541e-17	-	4	3828	Protein of unknown function (DUF810) [Source:TAIR;Acc:AT4G11670]	-
AT5G51660	1878.17	856.32	1.13066	1.91081e-17	9.97538e-17	CPSF160	5	5116	Cleavage and polyadenylation specificity factor subunit 1 [Source:UniProtKB/Swiss-Prot;Acc:Q9FGR0]	-
AT5G53930	550.972	164.554	1.73489	1.921e-17	1.00264e-16	-	5	1896	Transcriptional regulator ATRX-like protein [Source:UniProtKB/TrEMBL;Acc:Q9FN33]	-
AT1G11765	81.6607	16.4399	2.31155	1.94081e-17	1.01234e-16	-	1	721	At1g11763 [Source:UniProtKB/TrEMBL;Acc:Q9SAA0]	Self-incomp_S1
AT1G79610	994.567	472.639	1.06967	1.99924e-17	1.04238e-16	NHX6	1	1955	Sodium/hydrogen exchanger 6 [Source:UniProtKB/Swiss-Prot;Acc:Q8RWU6]	Na_H_Exchanger
AT5G42030	540.19	235.573	1.19034	2.03531e-17	1.06052e-16	ABIL4	5	1522	ABL interactor-like protein 4 [Source:TAIR;Acc:AT5G42030]	-
AT3G13810	666.977	284.227	1.22604	2.04993e-17	1.06791e-16	AtIDD11	3	2409	indeterminate(ID)-domain 11 [Source:TAIR;Acc:AT3G13810]	-
[truncated: 3,033 more rows]

## Sheet: DOWN Col-0 hAT vs nAT
gene_id	COL_HT	COL_NC	log2FoldChange	pvalue	padj	gene_name	gene_chr	gene_length	gene_description	tf_family
AT5G60390	43911.5	127656	-1.53958	0	0	A1	5	2325	Elongation factor 1-alpha 4 [Source:UniProtKB/Swiss-Prot;Acc:Q8GTY0]	GTP_EFTU
AT5G13930	9839.39	56258.3	-2.51538	0	0	CHS	5	1703	Chalcone synthase family protein [Source:UniProtKB/TrEMBL;Acc:Q460R0]	Chal_sti_synt_N
AT5G44340	5419.39	18564.8	-1.7762	0	0	TUBB4	5	1797	Tubulin beta-4 chain [Source:UniProtKB/Swiss-Prot;Acc:P24636]	Tubulin
AT4G11320	3187.46	16797.6	-2.3977	0	0	RDL5	4	2338	Probable cysteine protease RDL5 [Source:UniProtKB/Swiss-Prot;Acc:Q9SUS9]	Peptidase_C1
AT2G20870	1699.67	10041.1	-2.56279	0	0	-	2	786	At2g20870 [Source:UniProtKB/TrEMBL;Acc:A6QRC7]	-
AT2G43610	1713.98	6240.02	-1.86349	0	0	-	2	1279	Endochitinase At2g43610 [Source:UniProtKB/Swiss-Prot;Acc:O22842]	-
AT4G30440	1273.47	5571.89	-2.12889	0	0	GAE1	4	1895	GAE1 [Source:UniProtKB/TrEMBL;Acc:A0A384LBP5]	-
AT3G09440	4470.46	15270.9	-1.77237	3.46344e-299	8.56127e-296	HSP70-3	3	3222	Heat shock protein 70 (Hsp 70) family protein [Source:UniProtKB/TrEMBL;Acc:A0A178VI76]	HSP70
AT5G24780	82162.3	259360	-1.65841	4.15698e-299	9.34149e-296	VSP1	5	1338	Vegetative storage protein 1 [Source:UniProtKB/Swiss-Prot;Acc:O49195]	-
AT3G02230	4619.65	14578.5	-1.65773	2.35352e-294	4.47513e-291	RGP1	3	1567	RGP1 [Source:UniProtKB/TrEMBL;Acc:A0A178VK37]	-
AT2G38530	4545.12	23750	-2.38537	1.84106e-287	3.25065e-284	LTP2	2	1113	Non-specific lipid-transfer protein [Source:UniProtKB/TrEMBL;Acc:A0A178W063]	-
AT2G36830	10088.5	24576	-1.28443	9.23067e-284	1.52115e-280	TIP1-1	2	1237	Aquaporin TIP1-1 [Source:UniProtKB/Swiss-Prot;Acc:P25818]	-
AT5G62210	781.538	5379.09	-2.78312	1.95775e-270	3.0246e-267	-	5	1233	Embryo-specific protein 3, (ATS3) [Source:UniProtKB/TrEMBL;Acc:Q9LVB5]	-
AT5G09810	13122.4	31133	-1.2464	8.37221e-269	1.21737e-265	ACT7	5	1812	AtACT7 [Source:UniProtKB/TrEMBL;Acc:A0A178UEW4]	Actin
AT3G08030	3446.84	9245.4	-1.42345	4.53872e-266	6.23292e-263	-	3	1909	F17A17.37 protein [Source:UniProtKB/TrEMBL;Acc:Q9SFB1]	-
AT5G02500	41271.8	116472	-1.49675	1.25396e-265	1.63141e-262	MED37E	5	2555	Probable mediator of RNA polymerase II transcription subunit 37e [Source:UniProtKB/Swiss-Prot;Acc:P22953]	HSP70
AT3G13920	9726.79	22624.2	-1.21771	2.55701e-259	3.16034e-256	EIF4A1	3	2565	Eukaryotic translation initiation factor 4A1 [Source:UniProtKB/TrEMBL;Acc:A0A1I9LSZ7]	DEAD
AT1G07930	12201.3	26961.4	-1.14395	3.81415e-259	4.48961e-256	A1	1	1894	Elongation factor 1-alpha 4 [Source:UniProtKB/Swiss-Prot;Acc:Q8GTY0]	GTP_EFTU
AT3G47520	1646.97	4277	-1.37706	1.55779e-245	1.75032e-242	MDH	3	2129	Malate dehydrogenase, chloroplastic [Source:UniProtKB/Swiss-Prot;Acc:Q9SN86]	-
AT1G13280	2283.8	6800.28	-1.57386	1.89136e-243	2.03272e-240	AOC4	1	1343	Allene oxide cyclase 4, chloroplastic [Source:UniProtKB/Swiss-Prot;Acc:Q93ZC5]	-
AT5G42980	4776.03	12092.3	-1.34019	1.08055e-239	1.11292e-236	TRX3	5	1035	Thioredoxin H3 [Source:UniProtKB/Swiss-Prot;Acc:Q42403]	-
AT5G64310	1886.08	4732.35	-1.32692	8.53839e-239	8.44242e-236	AGP1	5	946	Classical arabinogalactan protein 1 [Source:UniProtKB/Swiss-Prot;Acc:Q8LCN5]	-
AT1G12090	2098.86	7152.61	-1.76865	1.01212e-236	9.62257e-234	ELP	1	1194	ELP [Source:UniProtKB/TrEMBL;Acc:A0A178W1A4]	-
AT5G54160	1730.86	5309.6	-1.61717	1.32491e-235	1.21298e-232	OMT1	5	1497	Flavone 3'-O-methyltransferase 1 [Source:UniProtKB/Swiss-Prot;Acc:Q9FK25]	-
AT3G08580	20533.8	57387.9	-1.48269	2.78085e-224	2.37034e-221	AAC1	3	1729	AAC1 [Source:UniProtKB/TrEMBL;Acc:A0A384KYV2]	Mito_carr
AT1G67750	1839.06	6973.63	-1.92245	3.11162e-224	2.56387e-221	-	1	1803	Probable pectate lyase 5 [Source:UniProtKB/Swiss-Prot;Acc:Q9FXD8]	-
AT2G25520	3886.82	9891.1	-1.34729	1.10304e-220	8.79553e-218	-	2	1743	Probable sugar phosphate/phosphate translocator At2g25520 [Source:UniProtKB/Swiss-Prot;Acc:Q9SKJ7]	-
AT4G29020	2752.4	9388.23	-1.77001	2.01817e-218	1.46727e-215	-	4	921	Putative glycine-rich protein 5 [Source:UniProtKB/TrEMBL;Acc:Q9SZD2]	-
AT5G54770	8047.29	27850.7	-1.79101	3.59599e-218	2.5397e-215	THI1	5	1606	Thiamine thiazole synthase, chloroplastic [Source:UniProtKB/TrEMBL;Acc:A0A178UNL2]	-
AT3G10570	1414.18	3948.24	-1.48128	1.34676e-215	9.24736e-213	CYP77A6	3	2096	CYP77A6 [Source:UniProtKB/TrEMBL;Acc:A0A384LHU4]	p450
AT2G36570	2736.99	9345.98	-1.77145	1.79082e-214	1.19641e-211	PXC1	2	2588	Leucine-rich repeat receptor-like protein kinase PXC1 [Source:UniProtKB/Swiss-Prot;Acc:Q9SJQ1]	Pkinase
AT1G75040	427.144	1726.7	-2.01347	1.09943e-208	7.15179e-206	PR5	1	1095	Pathogenesis-related protein 5 [Source:UniProtKB/Swiss-Prot;Acc:P28493]	Thaumatin
AT2G05100	5104.67	23644.3	-2.21152	1.58517e-208	1.00471e-205	LHCB2.1	2	1406	photosystem II light harvesting complex gene 2.1 [Source:TAIR;Acc:AT2G05100]	-
AT1G56070	27729.4	64751.8	-1.22353	2.38059e-207	1.47115e-204	LOS1	1	3790	Elongation factor 2 [Source:UniProtKB/Swiss-Prot;Acc:Q9ASR1]	GTP_EFTU
AT3G52960	1801.7	5373.46	-1.57698	8.82212e-207	5.31888e-204	PRXIIE	3	1162	Peroxiredoxin-2E, chloroplastic [Source:UniProtKB/Swiss-Prot;Acc:Q949U7]	-
AT5G51950	754.687	3612.08	-2.258	6.42648e-201	3.69433e-198	-	5	2096	AT5g51950/MSG15_3 [Source:UniProtKB/TrEMBL;Acc:Q94KD2]	-
AT3G56370	4731.92	11909.5	-1.33153	3.34641e-198	1.88e-195	IRK	3	3515	Probable LRR receptor-like serine/threonine-protein kinase IRK [Source:UniProtKB/Swiss-Prot;Acc:Q9LY03]	Pkinase_Tyr
AT1G72290	7388.64	34253.8	-2.21289	5.35826e-198	2.94335e-195	WSCP	1	1071	Cysteine protease inhibitor WSCP [Source:UniProtKB/Swiss-Prot;Acc:Q9C7S6]	-
AT1G29930	22366.7	94629.3	-2.0809	2.46454e-196	1.32437e-193	LHCB1.3	1	1230	Chlorophyll a-b binding protein 1, chloroplastic [Source:UniProtKB/Swiss-Prot;Acc:P04778]	-
AT3G26060	1481.97	3758.53	-1.34241	2.98979e-196	1.57244e-193	ATPRX Q	3	1273	Thioredoxin superfamily protein [Source:UniProtKB/TrEMBL;Acc:F4JBC9]	-
AT4G34200	3790.34	8968.16	-1.24204	1.95961e-195	1.00916e-192	PGDH1	4	2227	D-3-phosphoglycerate dehydrogenase [Source:UniProtKB/TrEMBL;Acc:A0A178UWV4]	2-Hacid_dh_C
AT5G50790	1975.88	5675.24	-1.52135	1.99646e-194	1.00715e-191	SWEET10	5	1312	Bidirectional sugar transporter SWEET10 [Source:UniProtKB/Swiss-Prot;Acc:Q9LUE3]	-
AT1G29150	2345.27	6141.39	-1.38845	2.24932e-192	1.11202e-189	RPN6	1	2164	26S proteasome non-ATPase regulatory subunit 11 homolog [Source:UniProtKB/Swiss-Prot;Acc:Q9LP45]	-
AT5G47030	3042.37	6758.67	-1.15138	4.4743e-192	2.16863e-189	-	5	1228	ATP synthase subunit delta', mitochondrial [Source:UniProtKB/Swiss-Prot;Acc:Q96252]	-
AT5G11740	3046.25	11949.2	-1.97171	4.77794e-191	2.27127e-188	AGP15	5	1034	ATAGP15 [Source:UniProtKB/TrEMBL;Acc:C0SVP3]	-
AT5G23530	1624.81	4694.83	-1.53109	1.83693e-187	8.4087e-185	CXE18	5	1582	Probable carboxylesterase 18 [Source:UniProtKB/Swiss-Prot;Acc:Q9LT10]	Abhydrolase_3
AT4G21990	940.723	3590.1	-1.93295	2.73656e-187	1.22991e-184	45385	4	1827	5'-adenylylsulfate reductase 3, chloroplastic [Source:UniProtKB/Swiss-Prot;Acc:P92980]	-
AT1G09560	1348.25	4660.36	-1.78991	3.97958e-187	1.75663e-184	GLP4	1	1227	Germin-like protein subfamily 2 member 1 [Source:UniProtKB/Swiss-Prot;Acc:P94014]	-
AT5G20630	3698.56	11057	-1.57968	1.43173e-184	6.10188e-182	GER3	5	1008	Germin-like protein subfamily 3 member 3 [Source:UniProtKB/Swiss-Prot;Acc:P94072]	-
AT1G78570	4496.8	15264.8	-1.76341	6.52336e-184	2.73307e-181	RHM1	1	2572	Trifunctional UDP-glucose 4,6-dehydratase/UDP-4-keto-6-deoxy-D-glucose 3,5-epimerase/UDP-4-keto-L-rhamnose-reductase RHM1 [Source:UniProtKB/Swiss-Prot;Acc:Q9SYM5]	-
AT4G34710	6345.15	22406.3	-1.82013	7.71496e-183	3.17843e-180	ADC2	4	3015	Arginine decarboxylase 2 [Source:UniProtKB/Swiss-Prot;Acc:O23141]	-
AT3G51600	840.514	4164.59	-2.30789	2.68641e-176	1.07106e-173	LTP5	3	979	Non-specific lipid-transfer protein 5 [Source:UniProtKB/Swiss-Prot;Acc:Q9XFS7]	-
AT5G67360	8078.81	19369.7	-1.26163	1.69149e-175	6.4326e-173	SBT1.7	5	2960	Subtilisin-like protease SBT1.7 [Source:UniProtKB/Swiss-Prot;Acc:O65351]	Peptidase_S8
AT1G05850	6316.09	14434.8	-1.19245	1.89457e-175	7.09574e-173	CTL1	1	1905	Chitinase-like protein 1 [Source:UniProtKB/Swiss-Prot;Acc:Q9MA41]	-
AT1G60950	7046.4	23298.8	-1.72517	2.90332e-174	1.07115e-171	FD2	1	985	Ferredoxin [Source:UniProtKB/TrEMBL;Acc:A0A178W2W5]	Fer2
AT5G22430	1451.57	6005.29	-2.0479	1.73985e-173	6.32463e-171	-	5	949	Pollen Ole e 1 allergen and extensin family protein [Source:UniProtKB/TrEMBL;Acc:Q9FMQ8]	-
AT3G27850	2922.61	6625.19	-1.18082	1.14274e-170	4.09384e-168	RPL12C	3	959	50S ribosomal protein L12-3, chloroplastic [Source:UniProtKB/Swiss-Prot;Acc:P36212]	-
AT4G09000	3781.41	9124.08	-1.27111	5.69593e-170	2.01139e-167	GRF1	4	1458	General regulatory factor 1 [Source:UniProtKB/TrEMBL;Acc:F4JJ94]	-
AT1G19570	13353.5	35727.4	-1.41971	5.99716e-169	2.08794e-166	DHAR1	1	912	Glutathione S-transferase DHAR1, mitochondrial [Source:UniProtKB/Swiss-Prot;Acc:Q9FWR4]	-
AT4G24960	916.949	3125.47	-1.76823	3.9671e-168	1.34333e-165	HVA22D	4	1081	HVA22D [Source:UniProtKB/TrEMBL;Acc:A0A384LBZ3]	TB2_DP1_HVA22
AT5G19250	683.719	2601.31	-1.92732	1.09852e-166	3.62056e-164	-	5	928	Uncharacterized GPI-anchored protein At5g19250 [Source:UniProtKB/Swiss-Prot;Acc:P59833]	-
AT5G52240	2831.51	7802.22	-1.46177	2.80344e-164	9.11819e-162	MSBP1	5	1129	Membrane steroid-binding protein 1 [Source:UniProtKB/Swiss-Prot;Acc:Q9XFM6]	-
AT2G35960	237.965	1303.97	-2.45767	1.24836e-163	4.00755e-161	NHL12	2	1147	NDR1/HIN1-like protein 12 [Source:UniProtKB/Swiss-Prot;Acc:Q9SJ54]	-
AT1G01250	124.653	1124.24	-3.17118	3.00291e-161	9.39608e-159	ERF023	1	891	Ethylene-responsive transcription factor ERF023 [Source:UniProtKB/Swiss-Prot;Acc:Q1ECI2]	AP2
AT3G54820	1772.82	4970.77	-1.48686	7.89133e-161	2.40822e-158	PIP2-5	3	1790	Probable aquaporin PIP2-5 [Source:UniProtKB/Swiss-Prot;Acc:Q9SV31]	-
AT1G18080	10768.6	32880.4	-1.61029	2.12507e-160	6.40605e-158	RACK1A	1	1449	RACK1A_AT [Source:UniProtKB/TrEMBL;Acc:A0A178WHX3]	WD40
AT5G08260	3306.79	9177.86	-1.47266	2.82211e-158	8.30472e-156	SCPL35	5	1790	Serine carboxypeptidase-like 35 [Source:UniProtKB/Swiss-Prot;Acc:Q9LEY1]	Peptidase_S10
AT5G13430	1964.92	4662.06	-1.24555	1.01903e-157	2.89534e-155	UCR1-1	5	1298	Cytochrome b-c1 complex subunit Rieske-1, mitochondrial [Source:UniProtKB/Swiss-Prot;Acc:Q94JS0]	-
AT1G09310	8560.82	30310.7	-1.82392	3.90878e-157	1.08563e-154	-	1	989	T31J12.3 protein [Source:UniProtKB/TrEMBL;Acc:Q9ZPZ4]	-
AT1G54630	3174.8	6916.39	-1.12329	8.64606e-157	2.34859e-154	ACP3	1	1207	Acyl carrier protein 3, chloroplastic [Source:UniProtKB/Swiss-Prot;Acc:P25702]	PP-binding
AT4G27560	729.278	2851.73	-1.96584	5.46502e-156	1.45258e-153	UGT79B2	4	1804	UDP-glycosyltransferase 79B2 [Source:UniProtKB/Swiss-Prot;Acc:Q9T080]	UDPGT
AT4G21620	2995.69	10063.4	-1.74796	1.66477e-155	4.33172e-153	-	4	953	AT4g21620/F17L22_80 [Source:UniProtKB/TrEMBL;Acc:Q9SVT5]	-
AT2G34250	7257.92	16080.6	-1.14785	8.53455e-154	2.13097e-151	-	2	2347	AT2G34250 protein [Source:UniProtKB/TrEMBL;Acc:O80774]	-
AT1G70090	1328.28	4691.25	-1.82046	2.25914e-151	5.42172e-149	GATL9	1	2122	Probable galacturonosyltransferase-like 9 [Source:UniProtKB/Swiss-Prot;Acc:O04536]	Glyco_transf_8
AT4G38970	6434.89	19378.8	-1.59049	1.25398e-150	2.98048e-148	FBA2	4	1768	Fructose-bisphosphate aldolase [Source:UniProtKB/TrEMBL;Acc:A0A178UW98]	-
AT5G59310	823.52	3402.31	-2.0455	1.36116e-150	3.20442e-148	LTP4	5	830	Non-specific lipid-transfer protein 4 [Source:UniProtKB/Swiss-Prot;Acc:Q9LLR6]	-
AT1G17100	1107.53	3957.15	-1.83663	4.15915e-150	9.69905e-148	-	1	941	HBP1 [Source:UniProtKB/TrEMBL;Acc:A0A178W6J0]	-
AT5G67070	2316.91	9161.78	-1.98304	3.15459e-149	7.28768e-147	RALFL34	5	1358	Protein RALF-like 34 [Source:UniProtKB/Swiss-Prot;Acc:Q9FHA6]	-
AT2G01570	2924.05	7331.06	-1.32556	7.25448e-149	1.6604e-146	RGA	2	2322	DELLA protein RGA [Source:UniProtKB/Swiss-Prot;Acc:Q9SLH3]	GRAS
AT4G38680	7643.98	17578.2	-1.20145	3.00739e-148	6.82016e-146	CSP2	4	1734	GRP2 [Source:UniProtKB/TrEMBL;Acc:A0A178UYV3]	CSD
AT3G06035	268.803	1218.21	-2.18302	1.02135e-147	2.29517e-145	-	3	1070	Uncharacterized protein At3g06035 [Source:UniProtKB/TrEMBL;Acc:Q0WSE0]	-
AT3G10080	242.444	1219.68	-2.32915	2.46054e-147	5.47948e-145	-	3	1120	RmlC-like cupins superfamily protein [Source:UniProtKB/TrEMBL;Acc:A0A1I9LSI8]	-
AT1G53070	1044.09	4002.47	-1.93829	1.45149e-146	3.17516e-144	-	1	1315	Lectin-like protein At1g53070 [Source:UniProtKB/Swiss-Prot;Acc:Q9LNN2]	-
AT3G07430	1074.12	2824.59	-1.39548	6.66642e-146	1.4455e-143	YLMG1-1	3	1302	YlmG homolog protein 1-1, chloroplastic [Source:UniProtKB/Swiss-Prot;Acc:Q9SRS3]	-
AT5G11770	2358.41	5765.21	-1.28922	6.91756e-145	1.48691e-142	-	5	1194	NADH dehydrogenase [ubiquinone] iron-sulfur protein 7, mitochondrial [Source:UniProtKB/Swiss-Prot;Acc:Q42577]	-
AT3G55120	1198.87	5320.34	-2.14936	6.00759e-143	1.26924e-140	CHI1	3	1112	Chalcone--flavonone isomerase 1 [Source:UniProtKB/Swiss-Prot;Acc:P41088]	-
AT5G67500	1788.04	4059.54	-1.18309	1.58709e-141	3.29675e-139	VDAC2	5	1538	voltage dependent anion channel 2 [Source:TAIR;Acc:AT5G67500]	-
AT1G75050	275.244	1258.69	-2.19445	3.4356e-141	7.07704e-139	-	1	984	Pathogenesis-related thaumatin superfamily protein [Source:UniProtKB/TrEMBL;Acc:Q1PFD2]	Thaumatin
AT3G23810	2049.75	12783.1	-2.64057	4.2628e-141	8.70844e-139	SAHH2	3	1932	Adenosylhomocysteinase [Source:UniProtKB/TrEMBL;Acc:A0A178VEP9]	-
AT1G57750	6564.95	15107.9	-1.20265	2.59018e-140	5.20542e-138	CYP96A15	1	1898	Alkane hydroxylase MAH1 [Source:UniProtKB/Swiss-Prot;Acc:Q9FVS9]	p450
AT4G08870	1609.23	4407.02	-1.45334	6.48891e-139	1.29354e-136	ARGAH2	4	1989	ARGAH2 [Source:UniProtKB/TrEMBL;Acc:A0A178V1K8]	-
AT1G77670	1186.07	2696.1	-1.18394	2.21062e-138	4.37154e-136	-	1	1701	At1g77670 [Source:UniProtKB/TrEMBL;Acc:Q9CAP1]	Aminotran_1_2
AT1G65720	2211.67	5126.78	-1.21377	5.90302e-138	1.14895e-135	-	1	1422	At1g65720/F1E22_13 [Source:UniProtKB/TrEMBL;Acc:Q9SHY3]	-
AT3G27830	2832.98	6930.66	-1.29049	3.59306e-137	6.90793e-135	RPL12A	3	1339	RPL12-A [Source:UniProtKB/TrEMBL;Acc:A0A178VJ19]	-
AT3G61580	2494.78	5896.03	-1.24041	6.81686e-137	1.2962e-134	SLD1	3	1951	Delta(8)-fatty-acid desaturase 1 [Source:UniProtKB/Swiss-Prot;Acc:Q9ZRP7]	-
AT4G34740	375.356	1372.06	-1.87	7.26616e-137	1.37109e-134	ASE2	4	2210	Amidophosphoribosyltransferase [Source:UniProtKB/TrEMBL;Acc:A0A178UYQ3]	Pribosyltran
AT1G08830	6325.27	18519	-1.5497	1.05078e-136	1.96775e-134	CSD1	1	873	Superoxide dismutase [Cu-Zn] 1 [Source:UniProtKB/Swiss-Prot;Acc:P24704]	-
AT3G04290	4025.94	8851.28	-1.13675	1.61593e-135	2.98091e-133	LTL1	3	1575	LTL1 [Source:UniProtKB/TrEMBL;Acc:A0A178VLC7]	Lipase_GDSL
AT3G46940	349.365	2301	-2.71955	2.87916e-135	5.27185e-133	DUT1	3	873	dUTP-PYROPHOSPHATASE-LIKE 1 [Source:UniProtKB/TrEMBL;Acc:A0A1I9LM85]	-
AT1G53240	4714.5	12762.7	-1.43638	1.01536e-134	1.8455e-132	mMDH1	1	1721	Malate dehydrogenase 1, mitochondrial [Source:UniProtKB/Swiss-Prot;Acc:Q9ZP06]	-
AT4G04610	788.293	3420.33	-2.11753	2.04042e-133	3.65486e-131	45383	4	1935	5'-adenylylsulfate reductase 1, chloroplastic [Source:UniProtKB/Swiss-Prot;Acc:P92979]	-
AT5G20330	1072.75	4632.21	-2.11081	2.7251e-133	4.84616e-131	BG4	5	1602	Probable glucan endo-1,3-beta-glucosidase BG4 [Source:UniProtKB/Swiss-Prot;Acc:O49352]	Glyco_hydro_17
AT1G04410	8407.36	28273.7	-1.7496	9.05058e-133	1.59801e-130	MDH1	1	1613	Malate dehydrogenase [Source:UniProtKB/TrEMBL;Acc:A0A178W4H0]	-
AT1G76670	1472.38	4602.07	-1.64406	1.50258e-132	2.61565e-130	URGT1	1	1804	UDP-rhamnose/UDP-galactose transporter 1 [Source:UniProtKB/Swiss-Prot;Acc:Q9SRE4]	-
AT1G75500	2627.58	6367.57	-1.27642	1.73213e-132	2.99416e-130	WAT1	1	1910	Protein WALLS ARE THIN 1 [Source:UniProtKB/Swiss-Prot;Acc:Q94AP3]	DUF6
AT1G64970	1274.45	4106.31	-1.68716	1.85011e-132	3.1759e-130	VTE4	1	1415	Tocopherol O-methyltransferase, chloroplastic [Source:UniProtKB/Swiss-Prot;Acc:Q9ZSK1]	Methyltransf_11
AT3G04790	531.664	1721.57	-1.69387	2.96843e-132	5.06045e-130	RPI3	3	992	EMB3119 [Source:UniProtKB/TrEMBL;Acc:A0A178V804]	Rib_5-P_isom_A
AT1G78300	3613.78	9067.97	-1.32774	2.47409e-131	4.16034e-129	GRF2	1	1609	14-3-3-like protein GF14 omega [Source:UniProtKB/Swiss-Prot;Acc:Q01525]	-
AT2G22240	2443.03	5723.48	-1.22843	4.2537e-131	7.05687e-129	IPS2	2	2273	Inositol-3-phosphate synthase isozyme 2 [Source:UniProtKB/Swiss-Prot;Acc:Q38862]	-
AT2G05070	3032.56	18291.7	-2.5924	2.92059e-130	4.71857e-128	LHCB2.2	2	1143	Chlorophyll a-b binding protein 2.2, chloroplastic [Source:UniProtKB/Swiss-Prot;Acc:Q9S7J7]	-
AT3G03450	1636.59	3943.24	-1.26813	3.10227e-129	4.94742e-127	RGL2	3	2316	RGL2 [Source:UniProtKB/TrEMBL;Acc:A0A178VH73]	GRAS
AT4G14960	14036.7	37888.1	-1.43246	5.2976e-129	8.39432e-127	TUBA6	4	1881	Tubulin alpha chain [Source:UniProtKB/TrEMBL;Acc:A0A178UXP7]	Tubulin
AT5G13440	1675.31	3888.04	-1.21534	6.43461e-129	1.0131e-126	UCR1-2	5	1534	Cytochrome b-c1 complex subunit Rieske-2, mitochondrial [Source:UniProtKB/Swiss-Prot;Acc:Q9LYR2]	-
AT5G51550	2338.52	6860.06	-1.55219	3.13924e-128	4.88044e-126	EXL3	5	1533	Protein EXORDIUM-like 3 [Source:UniProtKB/Swiss-Prot;Acc:Q9FHM9]	-
AT2G38540	36931.2	224559	-2.60417	9.30202e-127	1.41936e-124	LTP1	2	832	Non-specific lipid-transfer protein [Source:UniProtKB/TrEMBL;Acc:A0A178VZQ3]	-
AT5G59320	6703.89	15682.1	-1.22592	1.055e-126	1.59016e-124	LTP3	5	769	Non-specific lipid-transfer protein 3 [Source:UniProtKB/Swiss-Prot;Acc:Q9LLR7]	-
AT2G22170	535.347	2323.23	-2.11603	2.66741e-126	3.97203e-124	PLAT2	2	1194	PLAT domain-containing protein 2 [Source:UniProtKB/Swiss-Prot;Acc:Q9SIE7]	-
AT1G74970	1880.5	3814.3	-1.02036	2.97231e-126	4.39956e-124	RPS9	1	1117	30S ribosomal protein S9, chloroplastic [Source:UniProtKB/Swiss-Prot;Acc:Q9XJ27]	-
AT2G01610	691.426	2430.81	-1.81265	5.97698e-126	8.79434e-124	-	2	1108	At2g01610 [Source:UniProtKB/TrEMBL;Acc:Q9ZNU5]	-
AT1G47260	2334.43	5785.77	-1.30899	8.29398e-126	1.21313e-123	GAMMACA2	1	2807	GAMMA CA2 [Source:UniProtKB/TrEMBL;Acc:A0A178WI45]	-
AT3G51160	1026.7	2625.7	-1.35371	1.13547e-124	1.60387e-122	MUR1	3	1732	MUR_1 [Source:UniProtKB/TrEMBL;Acc:A0A178V6B0]	-
AT3G07390	3082.89	10038	-1.70267	3.99195e-124	5.57497e-122	AIR12	3	1196	AIR12 [Source:UniProtKB/TrEMBL;Acc:A0A178VEI7]	-
AT3G02640	1302.5	3299.94	-1.34145	6.07846e-124	8.44121e-122	-	3	918	F16B3.27 protein [Source:UniProtKB/TrEMBL;Acc:Q9M878]	-
AT3G63200	586.02	2211.55	-1.91476	9.57657e-124	1.32248e-121	PLP9	3	1834	Probable inactive patatin-like protein 9 [Source:UniProtKB/Swiss-Prot;Acc:Q93ZQ3]	-
AT4G39730	1288.88	5844.47	-2.1808	1.83244e-122	2.50254e-120	PLAT1	4	1009	PLAT1 [Source:UniProtKB/TrEMBL;Acc:A0A178V098]	-
AT5G12250	3323.9	7171.71	-1.10937	2.99204e-122	4.06376e-120	TUBB6	5	1966	Tubulin beta chain [Source:UniProtKB/TrEMBL;Acc:A0A178UPR2]	Tubulin
AT4G02500	1496.49	4433.1	-1.56651	5.64655e-122	7.62716e-120	XXT2	4	1913	Xyloglucan 6-xylosyltransferase 2 [Source:UniProtKB/Swiss-Prot;Acc:O22775]	-
AT3G04120	9574.42	36979.5	-1.94939	1.25097e-121	1.68058e-119	GAPC1	3	1711	Glyceraldehyde-3-phosphate dehydrogenase GAPC1, cytosolic [Source:UniProtKB/Swiss-Prot;Acc:P25858]	-
AT5G45350	1073.24	2960.9	-1.4637	1.79408e-121	2.39718e-119	-	5	2106	AT5g45350/MFC19_1 [Source:UniProtKB/TrEMBL;Acc:Q39115]	-
AT1G20200	1707.6	3673.78	-1.10594	2.27464e-121	3.02295e-119	RPN3A	1	1932	26S proteasome non-ATPase regulatory subunit 3 homolog A [Source:UniProtKB/Swiss-Prot;Acc:Q9LNU4]	-
AT3G27060	1886.16	4994.4	-1.40467	2.89775e-121	3.83046e-119	TSO2	3	1692	TSO2 [Source:UniProtKB/TrEMBL;Acc:A0A178VJE9]	-
AT1G10370	986.112	4357.11	-2.14354	4.10294e-121	5.39471e-119	GSTU17	1	1160	Glutathione S-transferase U17 [Source:UniProtKB/Swiss-Prot;Acc:Q9FUS8]	GST_N
AT2G42540	106.802	639.001	-2.57734	3.55668e-120	4.62724e-118	COR15A	2	1584	Protein COLD-REGULATED 15A, chloroplastic [Source:UniProtKB/Swiss-Prot;Acc:Q42512]	-
AT4G35320	152.157	881.024	-2.537	3.2827e-119	4.2263e-117	-	4	962	AT4g35320/F23E12_120 [Source:UniProtKB/TrEMBL;Acc:Q9ASZ6]	-
AT2G43710	2483.93	6278.6	-1.33751	1.13267e-118	1.43582e-116	FAB2	2	1838	Stearoyl-[acyl-carrier-protein] 9-desaturase 7, chloroplastic [Source:UniProtKB/Swiss-Prot;Acc:O22832]	-
AT3G52930	7166.77	27962.1	-1.96397	1.09686e-117	1.36935e-115	FBA8	3	2042	Fructose-bisphosphate aldolase [Source:UniProtKB/TrEMBL;Acc:A0A178V8L4]	-
AT5G67300	1114.1	4098.18	-1.8783	2.05983e-117	2.55865e-115	MYB44	5	1985	MYBR1 [Source:UniProtKB/TrEMBL;Acc:A0A178UQ74]	Myb_DNA-binding
AT5G24570	288.071	1191.07	-2.04829	1.09319e-116	1.33775e-114	-	5	452	Putative uncharacterized protein [Source:UniProtKB/TrEMBL;Acc:Q9FLU6]	-
AT1G13930	1842.18	9907.99	-2.42696	1.42587e-116	1.71933e-114	-	1	1032	At1g13930/F16A14.27 [Source:UniProtKB/TrEMBL;Acc:Q9XI93]	-
AT3G49570	72.2645	697.463	-3.27489	1.79203e-116	2.14968e-114	LSU3	3	744	Protein RESPONSE TO LOW SULFUR 3 [Source:UniProtKB/Swiss-Prot;Acc:Q9SCK2]	-
AT3G49110	84.5659	745.188	-3.13945	6.48544e-116	7.70739e-114	PER33	3	1565	Peroxidase 33 [Source:UniProtKB/Swiss-Prot;Acc:P24101]	-
AT4G38740	4918.76	13689.8	-1.47646	8.47949e-116	1.00289e-113	CYP18-3	4	1236	Peptidyl-prolyl cis-trans isomerase [Source:UniProtKB/TrEMBL;Acc:A0A178V2S8]	Pro_isomerase
AT4G08685	804.956	3529.78	-2.13139	1.94554e-115	2.29009e-113	SAH7	4	750	SAH7 [Source:UniProtKB/TrEMBL;Acc:A0A178UVW6]	-
AT1G53130	2445.76	7686.07	-1.65146	3.49481e-115	4.05579e-113	GRI	1	822	GRI [Source:UniProtKB/TrEMBL;Acc:A0A178W5X9]	-
AT4G31700	7999.51	22428.4	-1.48723	4.39168e-115	5.0728e-113	RPS6A	4	1180	40S ribosomal protein S6-1 [Source:UniProtKB/Swiss-Prot;Acc:O48549]	-
AT5G38410	18284.5	43818.7	-1.2609	9.14317e-115	1.04634e-112	-	5	1410	Ribulose bisphosphate carboxylase small chain [Source:UniProtKB/TrEMBL;Acc:B3H5S2]	-
AT5G07990	827.746	2518.83	-1.60676	1.00811e-114	1.14837e-112	CYP75B1	5	1929	TT7 [Source:UniProtKB/TrEMBL;Acc:A0A178UNZ9]	p450
AT2G45600	267.537	949.063	-1.82523	2.51237e-114	2.84877e-112	CXE8	2	1527	Probable carboxylesterase 8 [Source:UniProtKB/Swiss-Prot;Acc:O64640]	Abhydrolase_3
AT2G18328	278.654	1530.42	-2.45582	1.56832e-113	1.75418e-111	RL4	2	670	Protein RADIALIS-like 4 [Source:UniProtKB/Swiss-Prot;Acc:Q1G3C4]	-
AT5G49440	1915.52	5194.62	-1.43865	3.36014e-113	3.74141e-111	-	5	1538	AT5g49440/K7J8_12 [Source:UniProtKB/TrEMBL;Acc:Q9FGX3]	-
AT2G03820	1640.09	3621.87	-1.14313	3.499e-113	3.87856e-111	-	2	2041	60S ribosomal export protein NMD3 [Source:UniProtKB/TrEMBL;Acc:Q9SI58]	-
AT3G13520	1328.22	5621.77	-2.08143	4.89979e-113	5.40705e-111	AGP12	3	810	Arabinogalactan protein 12 [Source:UniProtKB/Swiss-Prot;Acc:Q9LJD9]	-
AT4G14690	263.678	1343.81	-2.3471	5.04144e-112	5.46576e-110	ELIP2	4	909	Early light-induced protein 2, chloroplastic [Source:UniProtKB/Swiss-Prot;Acc:Q94K66]	-
AT4G32390	2432.02	4874.27	-1.00278	5.17003e-112	5.5807e-110	-	4	1539	Probable sugar phosphate/phosphate translocator At4g32390 [Source:UniProtKB/Swiss-Prot;Acc:Q9SUV2]	-
AT3G54810	499.872	1428.19	-1.51563	6.86834e-112	7.38168e-110	GATA8	3	2107	GATA transcription factor [Source:UniProtKB/TrEMBL;Acc:B9DHF1]	GATA
AT1G78820	804.653	2467.09	-1.61631	1.17269e-111	1.24411e-109	-	1	1836	EP1-like glycoprotein 1 [Source:UniProtKB/Swiss-Prot;Acc:Q9ZVA1]	B_lectin
AT1G62500	4484.8	10568.5	-1.23633	1.65223e-111	1.74536e-109	-	1	1580	Bifunctional inhibitor/lipid-transfer protein/seed storage 2S albumin superfamily protein [Source:UniProtKB/TrEMBL;Acc:Q9SXE7]	-
AT3G49120	959.239	2725.12	-1.50734	1.86261e-110	1.9427e-108	PER34	3	1522	Peroxidase 34 [Source:UniProtKB/Swiss-Prot;Acc:Q9SMU8]	-
AT5G45280	259.695	879.178	-1.76113	2.45922e-109	2.54349e-107	PAE11	5	1557	Pectin acetylesterase 11 [Source:UniProtKB/Swiss-Prot;Acc:Q9FH82]	-
AT3G18130	2500.43	7489.2	-1.58216	3.3835e-109	3.48487e-107	RACK1C	3	1392	Receptor for activated C kinase 1C [Source:UniProtKB/Swiss-Prot;Acc:Q9LV28]	WD40
AT5G22740	2018.29	5688.08	-1.49439	1.28611e-108	1.3137e-106	CSLA2	5	2619	Glycosyltransferase (Fragment) [Source:UniProtKB/TrEMBL;Acc:W8PUD8]	-
AT3G13110	934.125	2432.1	-1.38014	1.32986e-108	1.35279e-106	SAT3	3	1904	Serine acetyltransferase 3, mitochondrial [Source:UniProtKB/Swiss-Prot;Acc:Q39218]	Hexapep
AT5G56030	10360	24126.9	-1.21951	1.62458e-108	1.64582e-106	HSP81-2	5	2875	Heat shock protein 81-2 [Source:UniProtKB/TrEMBL;Acc:F4K6B6]	HATPase_c
AT1G09200	3751.1	10338.7	-1.46245	2.47056e-108	2.49265e-106	HTR2	1	764	Histone H3 [Source:UniProtKB/TrEMBL;Acc:Q0WRA9]	Histone
AT2G47110	6847.73	18104.6	-1.40251	4.25076e-108	4.27132e-106	RPS27AB	2	711	UBQ6 [Source:UniProtKB/TrEMBL;Acc:A0A178VYW3]	ubiquitin
AT2G29550	5294.46	12958.9	-1.29108	4.85958e-108	4.86332e-106	TUBB7	2	1816	Tubulin beta-7 chain [Source:UniProtKB/Swiss-Prot;Acc:P29515]	Tubulin
AT5G19290	3189.31	9648.22	-1.5966	3.28859e-107	3.27785e-105	-	5	1568	Alpha/beta-Hydrolases superfamily protein [Source:UniProtKB/TrEMBL;Acc:Q8VZV6]	-
AT1G72230	345.743	1273.5	-1.87847	9.29229e-107	9.22474e-105	-	1	1062	At1g72230/T9N14_17 [Source:UniProtKB/TrEMBL;Acc:Q9C7T2]	Cu_bind_like
AT4G03520	1719.76	3843.88	-1.15991	1.63267e-106	1.61432e-104	ATHM2	4	1251	Thioredoxin M2, chloroplastic [Source:UniProtKB/Swiss-Prot;Acc:Q9SEU8]	-
AT4G12650	3461.92	7615.37	-1.13758	1.81086e-106	1.78337e-104	TMN12	4	2583	Transmembrane 9 superfamily member [Source:UniProtKB/TrEMBL;Acc:A0A178UTX6]	-
AT1G67740	3495.37	7513.36	-1.10415	7.18438e-106	7.01939e-104	PSBY	1	1219	Putative uncharacterized protein [Source:UniProtKB/TrEMBL;Acc:Q549N8]	-
AT4G39800	2192.8	8437.78	-1.9438	1.31294e-105	1.27273e-103	IPS1	4	2095	Inositol-3-phosphate synthase isozyme 1 [Source:UniProtKB/Swiss-Prot;Acc:P42801]	-
AT1G04680	1874.64	4569.4	-1.28527	1.93696e-105	1.8703e-103	-	1	2074	Pectate lyase [Source:UniProtKB/TrEMBL;Acc:A0A178W464]	-
AT1G71100	491.778	1261.96	-1.35972	6.09533e-105	5.86266e-103	RPI1	1	1663	Probable ribose-5-phosphate isomerase 1 [Source:UniProtKB/Swiss-Prot;Acc:Q9C998]	Rib_5-P_isom_A
AT1G66200	4632.66	10660.3	-1.2019	2.90066e-104	2.75775e-102	ATGSR2	1	1686	Glutamine synthetase [Source:UniProtKB/TrEMBL;Acc:F4ID91]	-
AT2G34870	4183.21	9005.88	-1.10597	5.69602e-104	5.33333e-102	MEE26	2	717	Expressed protein [Source:UniProtKB/TrEMBL;Acc:O64751]	-
AT5G08000	2031.24	4628.66	-1.18769	1.47951e-103	1.37489e-101	E13L3	5	1355	glucan endo-1,3-beta-glucosidase-like protein 3 [Source:TAIR;Acc:AT5G08000]	-
AT5G20885	651.121	1499.85	-1.20369	3.5333e-103	3.25894e-101	-	5	1452	AT5g20880/F22D1_50 [Source:UniProtKB/TrEMBL;Acc:Q93ZD8]	-
AT3G19680	158.11	930.795	-2.55541	3.94388e-103	3.62412e-101	-	3	1856	Uncharacterized protein At3g19680 [Source:UniProtKB/TrEMBL;Acc:Q9LJM6]	-
AT1G75950	5113.41	12454	-1.28392	6.28677e-103	5.73442e-101	SKP1A	1	1121	SKP1-like protein 1A [Source:UniProtKB/Swiss-Prot;Acc:Q39255]	Skp1_POZ
AT2G01140	4561.34	12560.7	-1.46107	9.03019e-103	8.17645e-101	FBA3	2	1827	Fructose-bisphosphate aldolase 3, chloroplastic [Source:UniProtKB/Swiss-Prot;Acc:Q9ZU52]	-
AT5G55730	3375.95	7606.95	-1.17161	9.65321e-103	8.70868e-101	FLA1	5	1755	Fasciclin-like arabinogalactan protein 1 [Source:UniProtKB/Swiss-Prot;Acc:Q9FM65]	-
AT3G56110	677.889	1620	-1.25684	1.61463e-102	1.45134e-100	PRA1B1	3	1585	PRA1 family protein [Source:UniProtKB/TrEMBL;Acc:A0A178VNJ7]	-
AT1G62180	383.913	1966.16	-2.35597	7.67255e-102	6.84685e-100	45384	1	2049	5'-adenylylsulfate reductase 2, chloroplastic [Source:UniProtKB/Swiss-Prot;Acc:P92981]	-
AT1G07890	9180.16	27504.1	-1.58297	1.24461e-101	1.10668e-99	APX1	1	1790	MEE6 [Source:UniProtKB/TrEMBL;Acc:A0A178W5I1]	-
AT3G15360	593.885	2006.05	-1.75431	1.67917e-101	1.48772e-99	ATHM4	3	1168	TRX-M4 [Source:UniProtKB/TrEMBL;Acc:A0A178VJ83]	-
AT5G12940	171.489	900.685	-2.39126	4.48938e-101	3.9213e-99	-	5	1458	Leucine-rich repeat (LRR) family protein [Source:UniProtKB/TrEMBL;Acc:Q9LXU5]	LRRNT_2
AT2G42200	1334.8	4060.6	-1.60466	1.09605e-100	9.50642e-99	SPL9	2	1780	Squamosa promoter-binding-like protein 9 [Source:UniProtKB/Swiss-Prot;Acc:Q700W2]	SBP
AT1G03870	474.174	1452.53	-1.61585	1.23526e-100	1.06764e-98	FLA9	1	1164	At1g03870 [Source:UniProtKB/TrEMBL;Acc:B3LF88]	-
AT4G09650	2343.79	7501.96	-1.67801	3.15201e-100	2.69601e-98	ATPD	4	1151	PDE332 [Source:UniProtKB/TrEMBL;Acc:A0A178V1L3]	-
AT5G66570	13178.8	28550	-1.11511	3.45599e-100	2.94581e-98	PSBO1	5	1508	Oxygen-evolving enhancer protein 1-1, chloroplastic [Source:UniProtKB/Swiss-Prot;Acc:P23321]	-
AT2G05380	14.6235	341.695	-4.53865	7.74886e-100	6.55973e-98	GRP3S	2	914	glycine-rich protein 3 short isoform [Source:TAIR;Acc:AT2G05380]	-
AT1G69690	1076.88	2494.43	-1.21091	7.82037e-100	6.59767e-98	TCP15	1	2063	TCP15 [Source:UniProtKB/TrEMBL;Acc:A0A178WLV7]	TCP
AT1G07920	9770.39	24499.6	-1.32609	2.36752e-99	1.99057e-97	A1	1	1858	Elongation factor 1-alpha 4 [Source:UniProtKB/Swiss-Prot;Acc:Q8GTY0]	GTP_EFTU
AT4G24510	1071.19	2712.43	-1.34113	1.77856e-98	1.49031e-96	CER2	4	1627	VC2 [Source:UniProtKB/TrEMBL;Acc:A0A178V1H6]	-
AT3G61820	2137.01	5125.95	-1.26194	1.82645e-98	1.52527e-96	-	3	2056	Eukaryotic aspartyl protease family protein [Source:UniProtKB/TrEMBL;Acc:Q9M356]	-
AT5G10480	2611.34	5285.75	-1.0173	3.15463e-98	2.62557e-96	PAS2	5	1053	Very-long-chain (3R)-3-hydroxyacyl-CoA dehydratase [Source:UniProtKB/TrEMBL;Acc:F4KGW0]	-
AT5G08640	3501.87	14752	-2.07452	6.94968e-98	5.76474e-96	FLS1	5	1618	Flavonol synthase/flavanone 3-hydroxylase [Source:UniProtKB/Swiss-Prot;Acc:Q96330]	2OG-FeII_Oxy
AT4G02770	5401.55	12139.9	-1.16853	2.93347e-97	2.40905e-95	PSAD1	4	1134	Photosystem I reaction center subunit II-1, chloroplastic [Source:UniProtKB/Swiss-Prot;Acc:Q9S7H1]	-
AT3G53260	1264.79	2620.34	-1.05064	3.23995e-97	2.65193e-95	PAL2	3	2887	Phenylalanine ammonia-lyase 2 [Source:UniProtKB/Swiss-Prot;Acc:P45724]	-
AT2G24090	1345.76	4060.64	-1.59327	5.98717e-97	4.88439e-95	RPL35	2	859	50S ribosomal protein L35, chloroplastic [Source:UniProtKB/Swiss-Prot;Acc:Q8VZ55]	-
AT5G02380	29934.3	190510	-2.66998	6.2193e-97	5.05707e-95	MT2B	5	571	Metallothionein-like protein 2B [Source:UniProtKB/Swiss-Prot;Acc:Q38805]	-
AT3G16570	1027.55	5117.53	-2.31588	3.10676e-96	2.50968e-94	RALF23	3	1965	RALF23 [Source:UniProtKB/TrEMBL;Acc:A0A178V8S6]	-
AT4G38220	1301.06	2824.79	-1.1173	4.8969e-96	3.91736e-94	-	4	1642	Peptidase M20/M25/M40 family protein [Source:UniProtKB/TrEMBL;Acc:F4JTK8]	Peptidase_M20
AT4G24330	1783.64	3777.25	-1.0816	7.33135e-96	5.84593e-94	-	4	1961	At4g24330 [Source:UniProtKB/TrEMBL;Acc:Q9STW1]	-
AT5G18690	295.909	940.644	-1.66886	1.99627e-95	1.58668e-93	AGP25	5	965	ATAGP25 [Source:UniProtKB/TrEMBL;Acc:A0A178UK45]	-
AT1G04820	13748.7	29826.6	-1.1172	8.24331e-95	6.51011e-93	TUBA4	1	1971	Tubulin alpha-2 chain [Source:UniProtKB/Swiss-Prot;Acc:B9DGT7]	Tubulin
AT1G63710	142.641	581.342	-2.02336	1.68798e-94	1.32883e-92	CYP86A7	1	1896	Cytochrome P450 86A7 [Source:UniProtKB/Swiss-Prot;Acc:Q9CAD6]	p450
AT1G07940	6612.71	17623.3	-1.41397	1.77734e-94	1.39473e-92	A1	1	2504	Elongation factor 1-alpha 4 [Source:UniProtKB/Swiss-Prot;Acc:Q8GTY0]	GTP_EFTU
AT2G28190	3076.23	7541.99	-1.2934	1.62126e-93	1.26422e-91	CSD2	2	1053	Superoxide dismutase [Cu-Zn] 2, chloroplastic [Source:UniProtKB/Swiss-Prot;Acc:O78310]	-
AT3G18190	3427.6	8573.18	-1.32235	2.47048e-93	1.92037e-91	CCT4	3	2076	T-complex protein 1 subunit delta [Source:UniProtKB/Swiss-Prot;Acc:Q9LV21]	-
AT1G35680	1856.67	3809.44	-1.03598	4.58159e-93	3.53914e-91	RPL21	1	939	50S ribosomal protein L21, chloroplastic [Source:UniProtKB/Swiss-Prot;Acc:P51412]	-
AT4G24920	945.042	2266.86	-1.26344	1.30554e-92	9.99124e-91	-	4	1026	secE/sec61-gamma protein transport protein [Source:TAIR;Acc:AT4G24920]	-
AT3G16240	12617.9	39140	-1.63309	1.6047e-92	1.22428e-90	TIP2-1	3	1189	Aquaporin TIP2-1 [Source:UniProtKB/Swiss-Prot;Acc:Q41951]	-
AT5G56010	8144.86	21487.4	-1.39936	2.62429e-92	1.99599e-90	HSP90-3	5	2613	Heat shock protein 90-3 [Source:UniProtKB/Swiss-Prot;Acc:P51818]	HATPase_c
AT5G17050	537.44	1428.48	-1.41077	3.05123e-92	2.29949e-90	UGT78D2	5	1620	Glycosyltransferase (Fragment) [Source:UniProtKB/TrEMBL;Acc:W8PUE7]	UDPGT
AT1G27950	3933.2	12266.7	-1.64075	3.24624e-92	2.43902e-90	LTPG1	1	982	Non-specific lipid transfer protein GPI-anchored 1 [Source:UniProtKB/Swiss-Prot;Acc:Q9C7F7]	-
AT4G28250	1599.56	6042.13	-1.91688	8.94181e-92	6.65761e-90	EXPB3	4	2089	EXPB3 [Source:UniProtKB/TrEMBL;Acc:A0A178USU9]	-
AT1G09780	1540.89	4017.26	-1.38309	2.40174e-91	1.77219e-89	PGM1	1	1966	IPGAM1 [Source:UniProtKB/TrEMBL;Acc:A0A178W6V9]	-
AT1G08700	1075.07	2641.73	-1.29585	2.5559e-91	1.88034e-89	PS1	1	1761	Presenilin [Source:UniProtKB/TrEMBL;Acc:Q0V7S4]	-
AT5G49560	118.145	619.863	-2.38706	1.07868e-90	7.86542e-89	-	5	975	Putative methyltransferase family protein [Source:UniProtKB/TrEMBL;Acc:Q9FGZ0]	-
AT1G18540	7849.66	16139.6	-1.04007	1.94437e-90	1.41362e-88	RPL6A	1	1543	60S ribosomal protein L6-1 [Source:UniProtKB/Swiss-Prot;Acc:Q9FZ76]	-
AT1G18250	2169.83	5009.28	-1.20759	3.46103e-90	2.50156e-88	ATLP-1	1	1235	Pathogenesis-related thaumatin superfamily protein [Source:UniProtKB/TrEMBL;Acc:F4IAP1]	Thaumatin
AT1G22410	1883.92	4999.73	-1.40809	4.41064e-90	3.16938e-88	-	1	2123	Phospho-2-dehydro-3-deoxyheptonate aldolase [Source:UniProtKB/TrEMBL;Acc:Q9SK84]	-
AT3G63410	3252.28	6812.15	-1.06704	1.2562e-89	8.97456e-88	VTE3	3	1361	2-methyl-6-phytyl-1,4-hydroquinone methyltransferase, chloroplastic [Source:UniProtKB/Swiss-Prot;Acc:Q9LY74]	Methyltransf_11
AT1G13250	594.48	1667.57	-1.4883	1.98529e-89	1.41425e-87	GATL3	1	1738	Probable galacturonosyltransferase-like 3 [Source:UniProtKB/Swiss-Prot;Acc:Q0V7R1]	Glyco_transf_8
AT5G05060	1549.86	3966.09	-1.35448	4.70792e-89	3.34411e-87	-	5	1027	Cystatin/monellin superfamily protein [Source:UniProtKB/TrEMBL;Acc:Q9FF68]	-
AT5G23940	8017.08	20393.8	-1.34683	1.94664e-88	1.37369e-86	DCR	5	1948	BAHD acyltransferase DCR [Source:UniProtKB/Swiss-Prot;Acc:Q9FF86]	-
AT2G42990	277.462	897.503	-1.69484	4.54001e-88	3.17018e-86	-	2	1528	GDSL esterase/lipase At2g42990 [Source:UniProtKB/Swiss-Prot;Acc:Q67ZI9]	Lipase_GDSL
AT4G23990	339.739	908.501	-1.4192	1.76642e-87	1.22998e-85	CSLG3	4	2832	Cellulose synthase-like protein G3 [Source:UniProtKB/Swiss-Prot;Acc:Q0WVN5]	-
AT2G46505	1085.7	3065.11	-1.49645	7.41529e-87	5.14883e-85	SDH4	2	1291	SDH4 [Source:UniProtKB/TrEMBL;Acc:A0A178VQB2]	-
AT3G49910	10981.6	37484	-1.7712	2.97344e-86	2.04168e-84	RPL26A	3	1227	60S ribosomal protein L26-1 [Source:UniProtKB/Swiss-Prot;Acc:P51414]	KOW
AT3G55440	5504.18	14773	-1.42414	5.48306e-86	3.74408e-84	CTIMC	3	1638	Triosephosphate isomerase, cytosolic [Source:UniProtKB/Swiss-Prot;Acc:P48491]	-
AT2G44310	620.762	2816.86	-2.18105	6.55303e-86	4.46238e-84	-	2	805	Calcium-binding EF-hand family protein [Source:UniProtKB/TrEMBL;Acc:O64866]	-
AT5G08570	1266.45	2674.7	-1.07847	6.81521e-86	4.62817e-84	-	5	2162	Pyruvate kinase [Source:UniProtKB/TrEMBL;Acc:Q9FNN1]	PK
AT4G33360	640.787	1484.24	-1.21325	1.1337e-85	7.63594e-84	FLDH	4	1369	NAD(P)-binding Rossmann-fold superfamily protein [Source:UniProtKB/TrEMBL;Acc:Q9SZB3]	Epimerase
AT2G21050	753.276	1655.88	-1.13548	2.14119e-85	1.43436e-83	LAX2	2	1882	Auxin transporter-like protein 2 [Source:UniProtKB/Swiss-Prot;Acc:Q9S836]	Aa_trans
AT2G30432	270.616	1471.9	-2.44323	2.45395e-85	1.63944e-83	TCL1	2	633	TCL1 [Source:UniProtKB/TrEMBL;Acc:A0A178VV20]	-
AT3G27690	572.028	2326.67	-2.02344	2.97394e-85	1.98148e-83	LHCB2.4	3	1465	Chlorophyll a-b binding protein, chloroplastic [Source:UniProtKB/TrEMBL;Acc:A0A1I9LMB4]	-
AT1G29920	6143.98	33314.8	-2.43887	3.60901e-85	2.39172e-83	LHCB1.1	1	1314	Chlorophyll a-b binding protein 3, chloroplastic [Source:UniProtKB/Swiss-Prot;Acc:Q8VZ87]	-
AT1G73325	207.66	1142.51	-2.45924	3.97492e-85	2.62717e-83	-	1	863	Kunitz family trypsin and protease inhibitor protein [Source:UniProtKB/TrEMBL;Acc:Q9FX28]	-
AT3G20015	684.781	1661.24	-1.27885	5.4382e-85	3.58472e-83	ASPG2	3	2047	Protein ASPARTIC PROTEASE IN GUARD CELL 2 [Source:UniProtKB/Swiss-Prot;Acc:Q9LHE3]	-
AT3G54210	1906.25	4459.07	-1.22543	8.49209e-85	5.56806e-83	RPL17	3	997	50S ribosomal protein L17, chloroplastic [Source:UniProtKB/Swiss-Prot;Acc:Q9M385]	-
AT3G18830	1043.89	2228.4	-1.09368	1.04621e-84	6.84157e-83	PLT5	3	1997	PMT5 [Source:UniProtKB/TrEMBL;Acc:A0A178V5Y2]	Sugar_tr
AT2G43550	1549.78	4740.06	-1.61209	1.48172e-84	9.63858e-83	ATTI6	2	270	Defensin-like protein 197 [Source:UniProtKB/Swiss-Prot;Acc:O22869]	-
AT3G11120	1359.01	7158.8	-2.39672	3.08351e-84	1.99011e-82	RPL41G	3	367	60S ribosomal protein L41 [Source:UniProtKB/Swiss-Prot;Acc:P62120]	-
AT5G57123	305.348	1182.63	-1.95291	3.99947e-84	2.57455e-82	-	5	851	At5g57123 [Source:UniProtKB/TrEMBL;Acc:Q8LCB5]	-
AT5G16510	906.18	2145.66	-1.24256	1.4718e-83	9.37663e-82	RGP5	5	1639	Glycosyltransferase (Fragment) [Source:UniProtKB/TrEMBL;Acc:W8Q2T5]	-
AT4G39480	3204.93	7511.56	-1.22848	1.58346e-83	1.00621e-81	CYP96A9	4	2102	Cytochrome P450, family 96, subfamily A, polypeptide 9 [Source:UniProtKB/TrEMBL;Acc:Q9SVB0]	p450
AT4G23820	1950.12	4678.14	-1.2615	1.74792e-83	1.10787e-81	-	4	1695	Pectin lyase-like superfamily protein [Source:UniProtKB/TrEMBL;Acc:Q9SUP5]	-
AT5G16250	2102.97	7088.65	-1.75274	6.13837e-83	3.83167e-81	-	5	900	Transmembrane protein [Source:UniProtKB/TrEMBL;Acc:Q9LF03]	-
AT3G18280	165.763	590.699	-1.83477	7.25631e-83	4.51811e-81	-	3	703	Bifunctional inhibitor/lipid-transfer protein/seed storage 2S albumin superfamily protein [Source:UniProtKB/TrEMBL;Acc:A0A1I9LP30]	-
AT5G09730	10252.9	23216.4	-1.17893	7.29947e-83	4.53356e-81	BXL3	5	2863	Beta-D-xylosidase 3 [Source:UniProtKB/Swiss-Prot;Acc:Q9LXD6]	Glyco_hydro_3_C
AT2G31440	745.877	1703.15	-1.19034	9.25702e-83	5.73494e-81	-	2	1170	Gamma-secretase subunit APH1-like [Source:UniProtKB/Swiss-Prot;Acc:Q8L9G7]	-
AT3G27430	2237.4	5199.7	-1.21589	1.54238e-82	9.50774e-81	PBB1	3	1394	Proteasome subunit beta type [Source:UniProtKB/TrEMBL;Acc:A0A178VCF7]	Proteasome
AT1G75350	1437.74	3446.54	-1.26053	2.28111e-82	1.40265e-80	RPL31	1	849	50S ribosomal protein L31, chloroplastic [Source:UniProtKB/Swiss-Prot;Acc:Q9FWS4]	-
AT5G11230	452.661	1463.65	-1.6922	1.06547e-81	6.42372e-80	-	5	1695	Probable sugar phosphate/phosphate translocator At5g11230 [Source:UniProtKB/Swiss-Prot;Acc:Q9LFN3]	-
AT3G17390	3109.77	15691.8	-2.33498	1.171e-81	7.04283e-80	METK4	3	1697	S-adenosylmethionine synthase [Source:UniProtKB/TrEMBL;Acc:A0A178VIP8]	-
AT1G29980	1232.1	3789.11	-1.62006	1.47209e-81	8.83219e-80	-	1	2147	Uncharacterized protein T1P2.9 [Source:UniProtKB/TrEMBL;Acc:Q9C8S1]	-
AT5G44440	881.952	5621.7	-2.67196	2.12205e-81	1.2701e-79	-	5	2164	FAD-binding Berberine family protein [Source:TAIR;Acc:AT5G44440]	FAD_binding_4
AT5G66590	2440.88	6681.62	-1.45241	2.50349e-81	1.48759e-79	-	5	996	CAP (Cysteine-rich secretory proteins, Antigen 5, and Pathogenesis-related 1 protein) superfamily protein [Source:UniProtKB/TrEMBL;Acc:Q9FJY1]	SCP
AT4G11600	702.342	1646.49	-1.22765	3.33603e-81	1.9681e-79	GPX6	4	1027	Probable phospholipid hydroperoxide glutathione peroxidase 6, mitochondrial [Source:UniProtKB/Swiss-Prot;Acc:O48646]	GSHPx
AT1G67090	48572.8	159691	-1.71704	4.37612e-81	2.56944e-79	RBCS-1A	1	1268	Ribulose bisphosphate carboxylase small chain [Source:UniProtKB/TrEMBL;Acc:A0A178WD57]	-
AT1G31580	406.744	2432.58	-2.57961	7.35204e-81	4.29634e-79	ECS1	1	868	Protein ECS1 [Source:UniProtKB/Swiss-Prot;Acc:Q39066]	-
AT3G12610	1493.84	4661.55	-1.64092	1.15637e-80	6.72574e-79	DRT100	3	1673	DRT100 [Source:UniProtKB/TrEMBL;Acc:A0A178VMS3]	LRRNT_2
AT1G53310	1988.94	4376.77	-1.13775	1.96955e-80	1.14285e-78	PPC1	1	3573	Phosphoenolpyruvate carboxylase 1 [Source:UniProtKB/Swiss-Prot;Acc:Q9MAH0]	-
AT3G55280	3082.89	6641.91	-1.10681	2.39899e-80	1.38553e-78	RPL23AB	3	907	60S ribosomal protein L23a-2 [Source:UniProtKB/Swiss-Prot;Acc:Q9M3C3]	-
AT5G17030	53.1077	400.03	-2.91171	2.46515e-80	1.42042e-78	UGT78D3	5	1615	UGT78D3 [Source:UniProtKB/TrEMBL;Acc:A0A384LMC1]	UDPGT
AT2G36880	4285.87	17244.7	-2.00834	3.0258e-80	1.73941e-78	METK3	2	1839	S-adenosylmethionine synthase [Source:UniProtKB/TrEMBL;Acc:A0A178VXF8]	-
AT2G47840	808.727	2210.56	-1.44903	4.23746e-80	2.4303e-78	TIC20-II	2	815	Tic20-II [Source:UniProtKB/TrEMBL;Acc:A0A178VYR0]	-
AT5G38480	3552.19	11849.7	-1.73828	5.40444e-80	3.08527e-78	GRF3	5	1581	RCI1 [Source:UniProtKB/TrEMBL;Acc:A0A178UA42]	-
AT2G15970	603.075	2308.17	-1.9349	2.0782e-79	1.18094e-77	COR413PM1	2	1086	WCOR413-like protein [Source:UniProtKB/TrEMBL;Acc:A0A178VY40]	-
AT3G46320	1268.14	4404.86	-1.79591	2.41342e-79	1.36829e-77	-	3	644	Histone H4 [Source:UniProtKB/Swiss-Prot;Acc:P59259]	-
AT2G17230	366.715	1307.64	-1.83399	3.55938e-79	2.01337e-77	EXL5	2	1757	Protein EXORDIUM-like 5 [Source:UniProtKB/Swiss-Prot;Acc:Q9SII5]	-
AT3G58730	1640.32	4793.9	-1.54676	6.12244e-79	3.44739e-77	VHA-D	3	1352	V-type proton ATPase subunit D [Source:UniProtKB/Swiss-Prot;Acc:Q9XGM1]	ATP-synt_D
AT1G52855	283.999	1400.06	-2.30033	1.18096e-78	6.61954e-77	-	1	793	At1g52855 [Source:UniProtKB/TrEMBL;Acc:Q8LC41]	-
AT1G58430	512.212	1880.98	-1.87762	2.5388e-78	1.41983e-76	RXF26	1	1384	GDSL esterase/lipase At1g58430 [Source:UniProtKB/Swiss-Prot;Acc:Q9C648]	Lipase_GDSL
AT1G54500	866.775	2088.75	-1.26974	2.62502e-78	1.46474e-76	-	1	926	At1g54500/F20D21_31 [Source:UniProtKB/TrEMBL;Acc:Q9SLI4]	Rubredoxin
AT5G17870	1791.25	7235.82	-2.01377	2.86928e-78	1.59743e-76	PSRP6	5	876	plastid-specific 50S ribosomal protein 6 [Source:TAIR;Acc:AT5G17870]	-
AT4G08950	1323.69	6960.63	-2.39486	8.69058e-78	4.78447e-76	EXO	4	1373	Protein EXORDIUM [Source:UniProtKB/Swiss-Prot;Acc:Q9ZPE7]	-
AT1G13440	12669.3	35674.5	-1.49347	1.2121e-77	6.65818e-76	GAPC2	1	1789	Glyceraldehyde-3-phosphate dehydrogenase GAPC2, cytosolic [Source:UniProtKB/Swiss-Prot;Acc:Q9FX54]	-
AT3G44310	5408.65	15598.6	-1.52796	3.67606e-77	2.00593e-75	NIT1	3	2471	NITI [Source:UniProtKB/TrEMBL;Acc:A0A384KJ08]	CN_hydrolase
AT2G39010	2021.82	6520.05	-1.68875	4.56333e-77	2.4846e-75	PIP2-6	2	2148	Probable aquaporin PIP2-6 [Source:UniProtKB/Swiss-Prot;Acc:Q9ZV07]	-
AT5G15320	1153.74	3859.72	-1.74163	7.41758e-77	4.01215e-75	-	5	757	ATP synthase E chain [Source:UniProtKB/TrEMBL;Acc:Q8GXE7]	-
AT4G38920	3012.27	8197.32	-1.44391	2.25791e-76	1.21863e-74	VHA-c3	4	1783	V-type proton ATPase subunit c1 [Source:UniProtKB/Swiss-Prot;Acc:P0DH92]	-
AT3G61770	361	1057.02	-1.54826	7.64486e-76	4.0727e-74	-	3	1266	Acid phosphatase/vanadium-dependent haloperoxidase-related protein [Source:UniProtKB/TrEMBL;Acc:Q8RXV2]	-
AT4G39330	15076.8	52933.4	-1.81179	7.83877e-76	4.16702e-74	CAD9	4	1379	Probable cinnamyl alcohol dehydrogenase 9 [Source:UniProtKB/Swiss-Prot;Acc:P42734]	ADH_N
AT5G10390	1076.94	3547.77	-1.71921	8.34498e-76	4.4266e-74	HTR2	5	748	Histone H3 [Source:UniProtKB/TrEMBL;Acc:Q0WRA9]	Histone
AT4G34980	7989.49	22434.5	-1.48963	2.10301e-75	1.10136e-73	SBT1.6	4	2865	Subtilisin-like protease SBT1.6 [Source:UniProtKB/Swiss-Prot;Acc:O49607]	Peptidase_S8
AT4G29260	799.874	1734.64	-1.1156	3.6442e-75	1.89246e-73	-	4	1120	Acid phosphatase-like protein [Source:UniProtKB/TrEMBL;Acc:Q9M0F5]	-
AT4G28780	151.648	564.864	-1.89931	3.72565e-75	1.9307e-73	-	4	1984	GDSL esterase/lipase At4g28780 [Source:UniProtKB/Swiss-Prot;Acc:Q9SVU5]	Lipase_GDSL
AT1G11850	1123.11	3642.82	-1.6965	4.32012e-75	2.22942e-73	-	1	868	F12F1.31 protein [Source:UniProtKB/TrEMBL;Acc:O65397]	-
AT5G15090	2529.54	5955.16	-1.23458	5.34227e-75	2.75116e-73	VDAC3	5	1594	Mitochondrial outer membrane protein porin 3 [Source:UniProtKB/Swiss-Prot;Acc:Q9SMX3]	-
AT3G18780	3450.34	9365.51	-1.44038	1.60037e-74	8.20737e-73	ACT2	3	2417	Actin-2 [Source:UniProtKB/Swiss-Prot;Acc:Q96292]	Actin
AT1G55260	2629.83	8370.58	-1.67006	2.6335e-74	1.34777e-72	-	1	1082	Bifunctional inhibitor/lipid-transfer protein/seed storage 2S albumin superfamily protein [Source:UniProtKB/TrEMBL;Acc:F4I082]	-
AT2G13360	2532	5740.65	-1.1804	2.75213e-74	1.40557e-72	AGT1	2	2083	Serine--glyoxylate aminotransferase [Source:UniProtKB/Swiss-Prot;Acc:Q56YA5]	Aminotran_5
AT5G59850	3546.96	11402	-1.6844	3.05282e-74	1.55593e-72	RPS15AF	5	847	40S ribosomal protein S15a-1 [Source:UniProtKB/Swiss-Prot;Acc:P42798]	-
AT4G12800	7389.11	18282.1	-1.30678	7.68834e-74	3.88646e-72	PSAL	4	1140	photosystem I subunit l [Source:TAIR;Acc:AT4G12800]	-
AT4G34630	514.124	1737.79	-1.7556	8.39604e-74	4.23554e-72	-	4	1304	Prostatic spermine-binding-like protein [Source:UniProtKB/TrEMBL;Acc:O65687]	-
AT4G16390	782.859	1752.97	-1.16208	1.3867e-73	6.94523e-72	P67	4	2460	Pentatricopeptide repeat-containing protein At4g16390, chloroplastic [Source:UniProtKB/Swiss-Prot;Acc:Q8GWE0]	-
AT3G03600	485.385	1589.83	-1.71026	2.72705e-73	1.35634e-71	RPS2	3	1159	Putative ribosomal protein S2 [Source:UniProtKB/TrEMBL;Acc:Q0WU50]	-
AT1G48630	2852.13	9971.46	-1.80552	3.56715e-73	1.77061e-71	RACK1B	1	1431	RACK1B_AT [Source:UniProtKB/TrEMBL;Acc:A0A178W908]	WD40
AT2G18020	12197.8	41302.7	-1.75955	3.64211e-73	1.8042e-71	RPL8A	2	1177	EMB2296 [Source:UniProtKB/TrEMBL;Acc:A0A178VSS0]	Ribosomal_L2_C
AT5G20740	1444.26	6736.93	-2.22151	3.7578e-73	1.85778e-71	-	5	1189	Plant invertase/pectin methylesterase inhibitor superfamily protein [Source:TAIR;Acc:AT5G20740]	-
AT3G49580	13.8563	317.592	-4.53324	7.4257e-73	3.66379e-71	LSU1	3	886	LSU1 [Source:UniProtKB/TrEMBL;Acc:A0A178VF66]	-
AT4G22490	121.675	503.693	-2.04879	7.50127e-73	3.6937e-71	-	4	784	Bifunctional inhibitor/lipid-transfer protein/seed storage 2S albumin superfamily protein [Source:UniProtKB/TrEMBL;Acc:Q9SUX0]	-
AT5G01530	7322.64	18464	-1.33413	1.15999e-72	5.67796e-71	LHCB4.1	5	1396	Chlorophyll a-b binding protein CP29.1, chloroplastic [Source:UniProtKB/Swiss-Prot;Acc:Q07473]	-
AT2G39460	8018.21	17826.7	-1.15255	2.35657e-72	1.14444e-70	RPL23AA	2	1592	60S ribosomal protein L23a-1 [Source:UniProtKB/Swiss-Prot;Acc:Q8LD46]	-
AT5G64620	611.905	1659.12	-1.43838	6.53715e-72	3.14381e-70	C/VIF2	5	1097	Cell wall / vacuolar inhibitor of fructosidase 2 [Source:UniProtKB/Swiss-Prot;Acc:O49603]	-
AT1G66350	2268.24	5761.48	-1.34461	7.09887e-72	3.40072e-70	RGL1	1	2082	DELLA protein RGL1 [Source:UniProtKB/Swiss-Prot;Acc:Q9C8Y3]	GRAS
AT3G51510	552.814	1300.39	-1.23275	7.95543e-72	3.80368e-70	-	3	1204	AT3g51510/F26O13_150 [Source:UniProtKB/TrEMBL;Acc:Q9SCZ8]	-
AT1G24170	618.464	2293.7	-1.89021	2.13926e-71	1.01693e-69	GATL8	1	1852	Hexosyltransferase (Fragment) [Source:UniProtKB/TrEMBL;Acc:W8PW12]	Glyco_transf_8
AT3G08640	1256.41	3977.61	-1.66201	2.16199e-71	1.02576e-69	RER3	3	1460	Protein RETICULATA-RELATED 3, chloroplastic [Source:UniProtKB/Swiss-Prot;Acc:Q9C9Z2]	-
AT5G07030	4439.62	12135.1	-1.45087	2.61189e-71	1.23448e-69	-	5	1895	Eukaryotic aspartyl protease family protein [Source:UniProtKB/TrEMBL;Acc:F4K5B9]	-
AT3G21190	925.419	2616.32	-1.49807	3.3837e-71	1.59317e-69	MSR1	3	1855	Protein MANNAN SYNTHESIS-RELATED 1 [Source:UniProtKB/Swiss-Prot;Acc:Q9LU40]	-
AT3G07910	776.783	2708.56	-1.8008	4.40787e-71	2.06751e-69	-	3	794	AT3g07910/F17A17_25 [Source:UniProtKB/TrEMBL;Acc:Q9SFC3]	-
AT5G03390	762.902	1546.55	-1.01839	4.97615e-71	2.32965e-69	-	5	1665	At5g03390 [Source:UniProtKB/TrEMBL;Acc:Q9LZF0]	DUF295
AT5G20650	405.42	956.493	-1.23745	7.40741e-71	3.46132e-69	COPT5	5	740	Copper transporter 5 [Source:UniProtKB/Swiss-Prot;Acc:Q93VM8]	-
AT4G29680	1606.47	3749.94	-1.22319	9.82261e-71	4.564e-69	-	4	2205	Alkaline-phosphatase-like family protein [Source:UniProtKB/TrEMBL;Acc:Q9SU83]	-
AT3G21055	2983.77	7874.08	-1.39954	9.95999e-71	4.61915e-69	PSBTN	3	795	Photosystem II subunit T [Source:UniProtKB/TrEMBL;Acc:A0A1I9LS90]	-
AT4G02360	201.405	992.729	-2.29902	1.30912e-70	6.04862e-69	-	4	717	T14P8.17 [Source:UniProtKB/TrEMBL;Acc:O81297]	-
AT5G19770	3818.39	8720.72	-1.19144	1.31468e-70	6.06296e-69	TUBA3	5	1964	Tubulin alpha chain [Source:UniProtKB/TrEMBL;Acc:A0A178UTQ9]	Tubulin
AT5G01870	64.3285	807.022	-3.65272	1.38813e-70	6.38979e-69	LTP10	5	693	Non-specific lipid-transfer protein [Source:UniProtKB/TrEMBL;Acc:A0A178UD43]	-
AT4G17260	476.429	1029.07	-1.1109	1.70961e-70	7.81145e-69	-	4	1453	L-lactate dehydrogenase [Source:UniProtKB/TrEMBL;Acc:O23569]	-
AT2G37220	4958.18	12601.8	-1.34549	3.63741e-70	1.65281e-68	CP29B	2	1488	RNA-binding protein CP29B, chloroplastic [Source:UniProtKB/Swiss-Prot;Acc:Q9ZUU4]	RRM_1
AT3G12870	354.94	985.655	-1.47174	4.63418e-70	2.09803e-68	-	3	922	At3g12870 [Source:UniProtKB/TrEMBL;Acc:Q9LDH9]	-
AT2G22500	654.275	1486.78	-1.18411	5.70457e-70	2.5779e-68	PUMP5	2	2077	Mitochondrial uncoupling protein 5 [Source:UniProtKB/Swiss-Prot;Acc:Q9SJY5]	Mito_carr
AT4G10340	12509.3	34824.3	-1.47702	6.82031e-70	3.07648e-68	LHCB5	4	1389	Chlorophyll a-b binding protein, chloroplastic [Source:UniProtKB/TrEMBL;Acc:A0A178UW55]	-
AT3G05500	703.872	2694.89	-1.93617	9.49079e-70	4.27328e-68	-	3	1582	REF/SRPP-like protein At3g05500 [Source:UniProtKB/Swiss-Prot;Acc:Q9MA63]	-
AT2G17630	375.68	1301.1	-1.78968	9.55402e-70	4.29393e-68	PSAT2	2	1518	Phosphoserine aminotransferase 2, chloroplastic [Source:UniProtKB/Swiss-Prot;Acc:Q9SHP0]	Aminotran_5
AT5G14030	2484.49	5457.87	-1.13498	1.07654e-69	4.81212e-68	-	5	1938	Translocon-associated protein subunit beta [Source:UniProtKB/TrEMBL;Acc:Q94BY3]	-
AT4G39510	852.146	2007.97	-1.23752	1.10926e-69	4.94944e-68	CYP96A12	4	2014	CYP96A12 [Source:UniProtKB/TrEMBL;Acc:A0A178V036]	p450
AT2G36530	12984.7	33829.8	-1.38139	2.06869e-69	9.18062e-68	ENO2	2	2212	LOS2 [Source:UniProtKB/TrEMBL;Acc:A0A178VT47]	-
AT2G04780	1066.42	2874.58	-1.43126	2.8167e-69	1.24555e-67	FLA7	2	1739	Fasciclin-like arabinogalactan protein 7 [Source:UniProtKB/Swiss-Prot;Acc:Q9SJ81]	-
AT1G70270	70.7708	802.252	-3.50443	3.25592e-69	1.4372e-67	-	1	694	unknown protein; BEST Arabidopsis thaliana protein match is: unknown protein (TAIR:AT1G23965.1); Ha. [Source:TAIR;Acc:AT1G70270]	-
AT3G05590	11176.6	33513.5	-1.58418	3.5343e-69	1.55453e-67	RPL18B	3	1275	RPL18 [Source:UniProtKB/TrEMBL;Acc:A0A178V8M9]	-
AT3G47420	333.023	1035.89	-1.63585	3.7198e-69	1.63321e-67	ATPS3	3	2800	Putative glycerol-3-phosphate transporter 1 [Source:UniProtKB/Swiss-Prot;Acc:Q9C5L3]	MFS_1
AT3G56800	3095.25	10599.4	-1.77559	5.08721e-69	2.22568e-67	CAM5	3	1143	Calmodulin-2 [Source:UniProtKB/Swiss-Prot;Acc:P0DH97]	-
AT3G26140	3142.99	7903.56	-1.33067	5.77512e-69	2.52218e-67	-	3	1966	Cellulase (Glycosyl hydrolase family 5) protein [Source:UniProtKB/TrEMBL;Acc:A0A1I9LMY1]	-
AT3G09820	4258.15	13596.9	-1.67481	6.75579e-69	2.94008e-67	ADK1	3	1988	Adenosine kinase 1 [Source:UniProtKB/Swiss-Prot;Acc:Q9SF85]	PfkB
AT5G54970	298.268	879.063	-1.56165	1.06263e-68	4.60973e-67	-	5	1144	At5g54970 [Source:UniProtKB/TrEMBL;Acc:Q9FFT3]	-
AT3G12780	4256.42	8612.74	-1.01691	1.87971e-68	8.12315e-67	PGK1	3	1819	Phosphoglycerate kinase [Source:UniProtKB/TrEMBL;Acc:A0A178V5M8]	-
AT1G67785	1595.99	6202.05	-1.95811	2.40326e-68	1.03495e-66	-	1	759	Putative uncharacterized protein [Source:UniProtKB/TrEMBL;Acc:Q8VZ65]	-
AT5G37780	2382.86	5481.08	-1.20136	3.06578e-68	1.31112e-66	CAM1	5	1138	Calmodulin 1 [Source:UniProtKB/TrEMBL;Acc:F4K8M2]	-
AT2G34700	224.346	693.646	-1.62979	3.87377e-68	1.65381e-66	-	2	766	Pollen Ole e 1 allergen and extensin family protein [Source:UniProtKB/TrEMBL;Acc:O64586]	-
AT4G34720	1949.46	6849.15	-1.81243	3.89501e-68	1.66001e-66	VHA-c3	4	1360	V-type proton ATPase subunit c1 [Source:UniProtKB/Swiss-Prot;Acc:P0DH92]	-
AT3G53420	6697.19	14779.9	-1.14175	4.17658e-68	1.77695e-66	PIP2-1	3	1573	PIP2A [Source:UniProtKB/TrEMBL;Acc:A0A178V8P4]	-
AT2G42310	1420.52	6054.13	-2.09118	6.37558e-68	2.70787e-66	-	2	948	ESSS subunit of NADH:ubiquinone oxidoreductase (Complex I) protein [Source:UniProtKB/TrEMBL;Acc:Q9SLC8]	-
AT1G47640	894.88	2006.18	-1.1633	6.94988e-68	2.94672e-66	-	1	1180	At1g47640/F16N3_6 [Source:UniProtKB/TrEMBL;Acc:Q9SX96]	-
AT3G51260	1872.14	5238.03	-1.48393	8.52643e-68	3.59667e-66	PAD1	3	1301	Proteasome subunit alpha type [Source:UniProtKB/TrEMBL;Acc:A0A178VPE4]	Proteasome
AT3G09630	9793.57	19953.2	-1.02691	1.31347e-67	5.50299e-66	RPL4A	3	1645	60S ribosomal protein L4-1 [Source:UniProtKB/Swiss-Prot;Acc:Q9SF40]	-
AT2G04570	702.106	1849.97	-1.39905	1.34942e-67	5.64406e-66	-	2	1455	GDSL esterase/lipase At2g04570 [Source:UniProtKB/Swiss-Prot;Acc:Q9SJB4]	Lipase_GDSL
AT1G68590	1124.41	2522.21	-1.16536	1.37767e-67	5.74277e-66	-	1	932	30S ribosomal protein 3-1, chloroplastic [Source:UniProtKB/Swiss-Prot;Acc:Q9SX22]	-
AT4G34290	1032.45	2851.47	-1.46481	1.65021e-67	6.85573e-66	-	4	790	SWIB/MDM2 domain superfamily protein [Source:UniProtKB/TrEMBL;Acc:Q9SYZ4]	-
AT4G01150	3189.18	7181.99	-1.17091	2.94873e-67	1.22093e-65	CURT1A	4	948	Protein CURVATURE THYLAKOID 1A, chloroplastic [Source:UniProtKB/Swiss-Prot;Acc:O04616]	-
AT1G29310	1355.66	3347.9	-1.30354	3.76554e-67	1.55653e-65	-	1	1991	SecY protein transport family protein [Source:UniProtKB/TrEMBL;Acc:Q8RWJ5]	-
AT2G01290	470.37	1140.71	-1.27743	3.82275e-67	1.57754e-65	RPI2	2	1667	Probable ribose-5-phosphate isomerase 2 [Source:UniProtKB/Swiss-Prot;Acc:Q9ZU38]	Rib_5-P_isom_A
AT2G43770	907.761	1877.74	-1.04892	5.64345e-67	2.30579e-65	-	2	1423	At2g43770 [Source:UniProtKB/TrEMBL;Acc:O22826]	WD40
AT1G70600	10141.6	34991.3	-1.78666	6.74067e-67	2.74502e-65	RPL27AC	1	959	60S ribosomal protein L27a-3 [Source:UniProtKB/Swiss-Prot;Acc:P49637]	-
AT2G17265	619.528	1886.97	-1.60512	7.99051e-67	3.24331e-65	HSK	2	1415	Homoserine kinase [Source:UniProtKB/Swiss-Prot;Acc:Q8L7R2]	GHMP_kinases
AT5G23140	807.998	2061.36	-1.34939	1.0755e-66	4.35113e-65	CLPP2	5	1585	ATP-dependent Clp protease proteolytic subunit 2, mitochondrial [Source:UniProtKB/Swiss-Prot;Acc:Q9FN42]	-
AT2G27260	520.164	1105.9	-1.0876	1.49332e-66	6.02145e-65	-	2	1016	At2g27260/F12K2.16 [Source:UniProtKB/TrEMBL;Acc:Q9XIN3]	-
AT1G30120	3350.43	7362.05	-1.13527	1.79042e-66	7.19631e-65	PDH-E1 BETA	1	1669	Pyruvate dehydrogenase E1 component subunit beta-2, chloroplastic [Source:UniProtKB/Swiss-Prot;Acc:Q9C6Z3]	-
AT3G54890	9757.85	27788.8	-1.5098	2.19782e-66	8.80515e-65	LHCA1	3	1273	Chlorophyll a-b binding protein, chloroplastic [Source:UniProtKB/TrEMBL;Acc:A0A178VBT7]	-
AT3G07230	1852.92	4143.09	-1.15998	2.59131e-66	1.03648e-64	-	3	636	At3g07230 [Source:UniProtKB/TrEMBL;Acc:Q9SFV3]	-
AT1G76680	132.58	467.099	-1.81912	3.56189e-66	1.41781e-64	OPR1	1	2116	12-oxophytodienoate reductase 1 [Source:UniProtKB/TrEMBL;Acc:F4I403]	Oxidored_FMN
AT5G15650	3929.32	11655.3	-1.56836	4.06321e-66	1.61477e-64	RGP2	5	2355	UDP-arabinopyranose mutase 2 [Source:UniProtKB/Swiss-Prot;Acc:Q9LFW1]	-
AT5G08300	1619.93	3294.44	-1.02381	4.13657e-66	1.64128e-64	-	5	1513	Succinate--CoA ligase [ADP-forming] subunit alpha, mitochondrial [Source:UniProtKB/TrEMBL;Acc:A0A178U834]	CoA_binding
AT1G21750	3378.35	7383.08	-1.12772	7.00114e-66	2.76455e-64	PDIL1-1	1	2004	Protein disulfide isomerase-like 1-1 [Source:UniProtKB/Swiss-Prot;Acc:Q9XI01]	-
AT5G23970	596.937	1986.91	-1.73381	7.35312e-66	2.8943e-64	-	5	1592	Acetyl-CoA:benzylalcohol acetyltranferase-like protein [Source:UniProtKB/TrEMBL;Acc:Q9FLW4]	-
AT5G57020	1661.46	3523.32	-1.08371	7.70869e-66	3.02943e-64	NMT1	5	2012	Glycylpeptide N-tetradecanoyltransferase 1 [Source:UniProtKB/Swiss-Prot;Acc:Q9LTR9]	-
AT1G12990	310.488	759.347	-1.2929	1.39188e-65	5.44396e-64	-	1	2097	Beta-1,4-N-acetylglucosaminyltransferase family protein [Source:UniProtKB/TrEMBL;Acc:F4HP06]	-
AT4G25210	1743.86	4168.79	-1.25789	1.08671e-64	4.18417e-63	GEBPL	4	1606	GLABROUS1 enhancer-binding protein-like [Source:UniProtKB/Swiss-Prot;Acc:Q9SB42]	-
AT5G23280	926.831	2772.5	-1.5798	1.11133e-64	4.27232e-63	TCP7	5	2043	Transcription factor TCP7 [Source:UniProtKB/Swiss-Prot;Acc:Q9FMX2]	TCP
AT5G47550	1293.33	5878.74	-2.18431	1.51152e-64	5.7838e-63	CYS5	5	866	Cysteine proteinase inhibitor 5 [Source:UniProtKB/Swiss-Prot;Acc:Q41916]	-
AT4G25670	609.333	1347.37	-1.1463	1.66153e-64	6.34798e-63	-	4	1254	AT4g25670/L73G19_50 [Source:UniProtKB/TrEMBL;Acc:Q94BX3]	-
AT1G70560	999.039	2165.62	-1.11451	1.96087e-64	7.45703e-63	TAA1	1	1548	L-tryptophan--pyruvate aminotransferase 1 [Source:UniProtKB/Swiss-Prot;Acc:Q9S7N2]	-
AT3G45230	285.225	915.259	-1.67968	1.99117e-64	7.56063e-63	-	3	810	Hydroxyproline-rich glycoprotein family protein [Source:UniProtKB/TrEMBL;Acc:Q9M1T6]	-
AT3G22840	1313.75	4443.1	-1.75737	2.42555e-64	9.16777e-63	ELIP1	3	1035	ELIP1 [Source:UniProtKB/TrEMBL;Acc:A0A178VCA8]	-
AT1G19960	20.0901	514.53	-4.67875	3.59812e-64	1.35582e-62	-	1	921	Putative uncharacterized protein At1g19960 [Source:UniProtKB/TrEMBL;Acc:Q9LNS5]	-
AT2G40475	473.391	1111.92	-1.23023	5.1288e-64	1.92381e-62	-	2	1254	Expressed protein [Source:UniProtKB/TrEMBL;Acc:Q8RYE6]	-
AT2G16570	269.514	732.882	-1.44306	5.34709e-64	2.00265e-62	ASE1	2	2146	Amidophosphoribosyltransferase 1, chloroplastic [Source:UniProtKB/Swiss-Prot;Acc:Q9SI61]	Pribosyltran
AT4G15000	9034.14	34927.6	-1.95084	6.27955e-64	2.34478e-62	RPL27C	4	866	60S ribosomal protein L27 [Source:UniProtKB/TrEMBL;Acc:Q0WRB8]	-
AT1G52230	2729.86	8416.23	-1.62428	1.61668e-63	5.96459e-62	PSAH2	1	702	Photosystem I reaction center subunit VI-2, chloroplastic [Source:UniProtKB/Swiss-Prot;Acc:Q9SUI6]	-
AT2G05920	4864.59	10636.7	-1.12884	3.82914e-63	1.40852e-61	SBT1.8	2	3026	Subtilisin-like protease SBT1.8 [Source:UniProtKB/Swiss-Prot;Acc:Q9ZUF6]	Peptidase_S8
AT3G28500	4421.32	12703.3	-1.52244	4.63345e-63	1.70185e-61	RPP2C	3	951	60S acidic ribosomal protein P2-3 [Source:UniProtKB/Swiss-Prot;Acc:Q9LH85]	-
AT5G67210	179.139	513.501	-1.51638	8.08526e-63	2.94344e-61	IRX15-L	5	1209	IRX15-L [Source:UniProtKB/TrEMBL;Acc:A0A178UEM8]	-
AT4G28660	511.469	1884.44	-1.88001	9.03397e-63	3.28398e-61	PSB28	4	986	Photosystem II reaction center Psb28 protein [Source:UniProtKB/TrEMBL;Acc:F4JM05]	-
AT2G04390	2914.21	7422.85	-1.34858	1.24029e-62	4.50202e-61	RPS17A	2	895	40S ribosomal protein S17-1 [Source:UniProtKB/Swiss-Prot;Acc:P49205]	-
AT4G27720	750.656	1595.03	-1.08639	1.51973e-62	5.50823e-61	-	4	2052	AT4g27720/T29A15_210 [Source:UniProtKB/TrEMBL;Acc:Q9C5R0]	-
AT2G22640	269.391	797.771	-1.5671	2.47179e-62	8.93279e-61	BRK1	2	941	Protein BRICK 1 [Source:UniProtKB/Swiss-Prot;Acc:Q94JY4]	-
AT5G14040	6740.86	17616.7	-1.38574	2.65334e-62	9.56091e-61	MPT3	5	1698	Mitochondrial phosphate carrier protein 3, mitochondrial [Source:UniProtKB/Swiss-Prot;Acc:Q9FMU6]	Mito_carr
AT2G19640	403.303	1105.7	-1.45364	3.79289e-62	1.36274e-60	ASHR2	2	1729	Histone-lysine N-methyltransferase ASHR2 [Source:UniProtKB/Swiss-Prot;Acc:Q9ZUM9]	SET
AT3G06700	4132.87	11246.7	-1.44407	3.9235e-62	1.40762e-60	RPL29A	3	852	60S ribosomal protein L29-1 [Source:UniProtKB/Swiss-Prot;Acc:Q9M7X7]	-
AT2G33040	4536.48	10443.2	-1.20262	3.94862e-62	1.41458e-60	ATPC	2	1484	ATP synthase subunit gamma, mitochondrial [Source:UniProtKB/Swiss-Prot;Acc:Q96250]	-
AT5G17190	977.183	4149.98	-2.08598	4.21568e-62	1.50807e-60	-	5	1003	B-cell receptor-associated-like protein [Source:UniProtKB/TrEMBL;Acc:Q9FFJ0]	-
AT5G57785	192.126	1232.44	-2.68125	4.37592e-62	1.56313e-60	-	5	1312	At5g57785 [Source:UniProtKB/TrEMBL;Acc:Q8GY06]	-
AT1G56450	1847.02	4998.96	-1.436	4.93932e-62	1.76183e-60	PBG1	1	1350	Proteasome subunit beta type-4 [Source:UniProtKB/Swiss-Prot;Acc:Q7DLR9]	Proteasome
AT5G33370	2136.25	7479.63	-1.8081	6.42318e-62	2.27797e-60	-	5	1568	GDSL esterase/lipase At5g33370 [Source:UniProtKB/Swiss-Prot;Acc:Q8LB81]	Lipase_GDSL
AT2G16760	221.365	599.396	-1.43821	7.95071e-62	2.81567e-60	-	2	1229	Calcium-dependent phosphotriesterase superfamily protein [Source:UniProtKB/TrEMBL;Acc:Q9SLE2]	-
AT2G33150	3716.07	8809.44	-1.24477	9.93829e-62	3.50949e-60	PED1	2	2142	PKT3 [Source:UniProtKB/TrEMBL;Acc:A0A178VRP9]	Thiolase_N
AT2G12480	2551.56	8862.41	-1.79608	1.299e-61	4.57197e-60	SCPL43	2	1917	serine carboxypeptidase-like 43 [Source:TAIR;Acc:AT2G12480]	Peptidase_S10
AT2G32990	306.083	788.189	-1.36663	1.50335e-61	5.2711e-60	AtGH9B8	2	2032	Endoglucanase 11 [Source:UniProtKB/Swiss-Prot;Acc:O48766]	-
AT3G25140	2106.42	4374.55	-1.05389	2.26081e-61	7.86006e-60	GAUT8	3	2290	Hexosyltransferase (Fragment) [Source:UniProtKB/TrEMBL;Acc:W8PVC6]	Glyco_transf_8
AT3G23730	1976.37	4555.5	-1.20541	3.98469e-61	1.37566e-59	XTH16	3	1216	Probable xyloglucan endotransglucosylase/hydrolase protein 16 [Source:UniProtKB/Swiss-Prot;Acc:Q8LG58]	-
AT2G23350	4196.5	9000.26	-1.101	4.553e-61	1.56749e-59	PAB4	2	2589	Polyadenylate-binding protein 4 [Source:UniProtKB/Swiss-Prot;Acc:O22173]	RRM_1
AT5G64140	3816.66	11606.7	-1.60441	6.63469e-61	2.27782e-59	RPS28C	5	965	RPS28 [Source:UniProtKB/TrEMBL;Acc:A0A178UA91]	-
AT5G54760	1565.2	3418.31	-1.12659	6.83454e-61	2.34318e-59	-	5	1048	At5g54760 [Source:UniProtKB/TrEMBL;Acc:Q9FFV1]	SUI1
AT1G04260	434.484	1277.6	-1.55447	1.06692e-60	3.64773e-59	PRA1D	1	1287	PRA1 family protein D [Source:UniProtKB/Swiss-Prot;Acc:P93829]	-
AT1G07790	2261.57	6651.57	-1.55602	1.20117e-60	4.10107e-59	HTB1	1	853	Histone H2B.1 [Source:UniProtKB/Swiss-Prot;Acc:Q9LQQ4]	Histone
AT1G20050	1446.63	3611.2	-1.31896	1.27769e-60	4.3563e-59	HYD1	1	1163	Probable 3-beta-hydroxysteroid-Delta(8),Delta(7)-isomerase [Source:UniProtKB/Swiss-Prot;Acc:O48962]	EBP
AT3G47070	1143.46	4338.33	-1.92321	1.80145e-60	6.11675e-59	-	3	1142	Thylakoid soluble phosphoprotein [Source:UniProtKB/TrEMBL;Acc:Q9SD66]	-
AT1G71950	498.571	1358.7	-1.44649	1.85711e-60	6.29709e-59	-	1	748	At1g71950 [Source:UniProtKB/TrEMBL;Acc:Q9C8W7]	-
AT5G54270	7766.94	22411.8	-1.52873	1.92522e-60	6.51912e-59	LHCB3	5	1242	Chlorophyll a-b binding protein 3, chloroplastic [Source:UniProtKB/Swiss-Prot;Acc:Q9S7M0]	-
AT2G24762	54.8557	373.281	-2.7642	2.66758e-60	9.02049e-59	GDU4	2	1067	Protein GLUTAMINE DUMPER 4 [Source:UniProtKB/Swiss-Prot;Acc:Q8S8A0]	-
AT5G40950	2583.08	7865.77	-1.60616	2.75833e-60	9.31462e-59	RPL27	5	950	50S ribosomal protein L27, chloroplastic [Source:UniProtKB/Swiss-Prot;Acc:Q9FLN4]	-
AT2G30050	1269.78	3453.62	-1.44273	3.87987e-60	1.30663e-58	SEC13B	2	1360	Protein transport protein SEC13 homolog B [Source:UniProtKB/Swiss-Prot;Acc:O64740]	-
AT4G36130	4248.66	12012.3	-1.49926	3.93626e-60	1.32382e-58	RPL8C	4	1235	60S ribosomal protein L8-3 [Source:UniProtKB/Swiss-Prot;Acc:Q42064]	Ribosomal_L2_C
AT1G72730	421.123	1605.01	-1.92861	3.9564e-60	1.32878e-58	TIF4A-3	1	1706	Eukaryotic initiation factor 4A-3 [Source:UniProtKB/Swiss-Prot;Acc:Q9CAI7]	DEAD
AT1G65980	5921.64	20409.3	-1.78505	4.55886e-60	1.52904e-58	PRXIIB	1	1325	Peroxiredoxin-2B [Source:UniProtKB/Swiss-Prot;Acc:Q9XEX2]	-
AT1G11600	1243.26	3291.78	-1.40388	4.65168e-60	1.55806e-58	CYP77B1	1	1946	Cytochrome P450 like protein [Source:UniProtKB/TrEMBL;Acc:Q9SAB7]	p450
AT3G24225	198.992	976.59	-2.29297	5.46201e-60	1.827e-58	CLE19	3	850	ESR19 [Source:UniProtKB/TrEMBL;Acc:A0A178VF65]	-
AT2G30490	3200.06	6929.28	-1.11427	6.06034e-60	2.01623e-58	CYP73A5	2	2083	Cinnamate-4-hydroxylase [Source:UniProtKB/TrEMBL;Acc:B1GV49]	p450
AT3G54470	1213.6	2822.69	-1.21841	9.2854e-60	3.08088e-58	PYRE-F	3	1786	Uridine 5'-monophosphate synthase [Source:UniProtKB/Swiss-Prot;Acc:Q42586]	Pribosyltran
AT2G20420	3050.75	6154.32	-1.01184	1.57256e-59	5.19682e-58	-	2	1811	Succinate--CoA ligase [ADP-forming] subunit beta, mitochondrial [Source:UniProtKB/Swiss-Prot;Acc:O82662]	-
AT5G18660	629.957	2210.76	-1.81082	1.57875e-59	5.2103e-58	DVR	5	1591	Divinyl chlorophyllide a 8-vinyl-reductase, chloroplastic [Source:UniProtKB/Swiss-Prot;Acc:Q1H537]	-
AT1G65820	876.919	2211.41	-1.33408	2.24832e-59	7.39046e-58	-	1	1072	Microsomal glutathione s-transferase [Source:UniProtKB/TrEMBL;Acc:F4IBL0]	-
AT5G38980	504.42	1873.71	-1.89191	2.83265e-59	9.27419e-58	-	5	727	At5g38980 [Source:UniProtKB/TrEMBL;Acc:Q8GXY9]	-
AT4G32470	2047.94	4926.94	-1.26606	2.97383e-59	9.72356e-58	QCR7-1	4	946	Cytochrome b-c1 complex subunit 7-1 [Source:UniProtKB/Swiss-Prot;Acc:Q9SUU5]	-
AT2G38140	1007.09	2238.72	-1.1509	3.38302e-59	1.10469e-57	RPS31	2	610	30S ribosomal protein S31, chloroplastic [Source:UniProtKB/Swiss-Prot;Acc:O80439]	-
AT5G08160	1025.63	2175.02	-1.08321	3.6045e-59	1.17546e-57	ATPK3	5	1651	AT5g08160 [Source:UniProtKB/TrEMBL;Acc:O04265]	Pkinase
AT1G05550	794.893	3055.79	-1.94209	3.93111e-59	1.28028e-57	-	1	1858	Protein of unknown function (DUF295) [Source:TAIR;Acc:AT1G05550]	DUF295
AT3G43980	1010.36	2761.53	-1.44952	6.51903e-59	2.11475e-57	RPS29C	3	576	40S ribosomal protein S29 [Source:UniProtKB/Swiss-Prot;Acc:Q680P8]	-
AT4G31300	1717.78	4256.89	-1.30864	1.07898e-58	3.47734e-57	PBA1	4	1170	Proteasome subunit beta type [Source:UniProtKB/TrEMBL;Acc:F4JRY2]	Proteasome
AT5G08060	1513.04	3881.23	-1.35837	1.19804e-58	3.85101e-57	-	5	1237	Furry [Source:UniProtKB/TrEMBL;Acc:Q9SD78]	-
AT4G16500	827.833	2851.28	-1.78346	1.76922e-58	5.66496e-57	CYS4	4	1714	Cysteine proteinase inhibitor 4 [Source:UniProtKB/Swiss-Prot;Acc:Q84WT8]	-
AT3G50685	467.68	1450.47	-1.63058	1.87109e-58	5.97563e-57	-	3	680	AT3g50680/T3A5_60 [Source:UniProtKB/TrEMBL;Acc:Q941E5]	-
AT2G37270	4007.92	9522.58	-1.24825	4.1932e-58	1.32887e-56	RPS5A	2	1259	40S ribosomal protein S5-1 [Source:UniProtKB/Swiss-Prot;Acc:Q9ZUT9]	-
AT4G12730	1222.56	4048.71	-1.7279	4.67083e-58	1.47834e-56	FLA2	4	1854	Fasciclin-like arabinogalactan protein 2 [Source:UniProtKB/Swiss-Prot;Acc:Q9SU13]	-
AT1G15260	597.498	1711.73	-1.51828	5.77104e-58	1.82422e-56	-	1	814	LOW protein: ATP-dependent RNA helicase-like protein [Source:UniProtKB/TrEMBL;Acc:Q8VY60]	-
AT4G10040	487.608	1177.97	-1.2704	6.71103e-58	2.11865e-56	CYTC-2	4	815	CYTC-2 [Source:UniProtKB/TrEMBL;Acc:A0A178UZN3]	-
AT3G48730	1309.36	2665	-1.02412	7.46121e-58	2.34947e-56	GSA2	3	1773	Glutamate-1-semialdehyde 2,1-aminomutase 2, chloroplastic [Source:UniProtKB/Swiss-Prot;Acc:Q42522]	Aminotran_3
AT2G16510	1290.57	3071.81	-1.25012	8.63278e-58	2.71148e-56	VHA-c3	2	1634	V-type proton ATPase subunit c1 [Source:UniProtKB/Swiss-Prot;Acc:P0DH92]	-
AT5G48930	1273.35	2559.6	-1.0058	8.9542e-58	2.80887e-56	HST	5	1800	Shikimate O-hydroxycinnamoyltransferase [Source:UniProtKB/Swiss-Prot;Acc:Q9FI78]	-
AT5G18380	12585.8	64654.7	-2.36092	1.40791e-57	4.37212e-56	RPS16C	5	1093	40S ribosomal protein S16-3 [Source:UniProtKB/Swiss-Prot;Acc:Q42340]	-
AT1G62820	434.106	1256.94	-1.53175	1.44559e-57	4.48352e-56	CML14	1	1186	Probable calcium-binding protein CML14 [Source:UniProtKB/Swiss-Prot;Acc:Q8VZ50]	-
AT5G53710	94.8526	373.299	-1.97224	2.18233e-57	6.7347e-56	-	5	742	unknown protein; FUNCTIONS IN: molecular_function unknown; INVOLVED IN: biological_process unknown; LOCATED IN: endomembrane system; EXPRESSED IN: 8 plant structures; EXPRESSED DURING: 4 anthesis, C globular stage, petal differentiation and expansio /.../e; Ha. [Source:TAIR;Acc:AT5G53710]	-
AT1G27930	486.338	2750.36	-2.49877	2.28932e-57	7.05609e-56	-	1	2042	Probable methyltransferase At1g27930 [Source:UniProtKB/Swiss-Prot;Acc:Q9C7F9]	-
AT3G46430	1638.78	4729.66	-1.52884	2.70023e-57	8.31219e-56	-	3	573	AT3g46430/F18L15_150 [Source:UniProtKB/TrEMBL;Acc:Q9SN96]	-
AT5G03300	1806.37	4827.75	-1.4176	2.7886e-57	8.57357e-56	ADK2	5	2389	Adenosine kinase 2 [Source:UniProtKB/Swiss-Prot;Acc:Q9LZG0]	PfkB
AT2G22900	840.247	1688.35	-1.00731	2.98243e-57	9.15809e-56	GT7	2	1805	Putative glycosyltransferase 7 [Source:UniProtKB/Swiss-Prot;Acc:O81007]	-
AT5G39650	79.2982	378.467	-2.25033	5.191e-57	1.58611e-55	DMP9	5	992	Protein DMP9 [Source:UniProtKB/Swiss-Prot;Acc:Q9FK96]	-
AT1G64190	606.161	1407.8	-1.21614	1.11071e-56	3.36879e-55	PGD1	1	1809	6-phosphogluconate dehydrogenase, decarboxylating 1, chloroplastic [Source:UniProtKB/Swiss-Prot;Acc:Q9SH69]	NAD_binding_2
AT4G28210	374.167	835.29	-1.1584	1.29787e-56	3.92202e-55	emb1923	4	1301	At4g28210 [Source:UniProtKB/TrEMBL;Acc:Q9M0I6]	-
AT1G12570	301.64	1069.34	-1.82372	1.80525e-56	5.42872e-55	-	1	2342	At1g12570 [Source:UniProtKB/TrEMBL;Acc:Q66GI5]	-
AT5G05370	528.522	1668	-1.65701	4.3471e-56	1.29778e-54	-	5	469	At5g05370 [Source:UniProtKB/TrEMBL;Acc:Q9FLB7]	-
AT5G40810	1854.5	3998.42	-1.1079	5.81844e-56	1.73284e-54	CYC12	5	2022	Cytochrome c1 2, heme protein, mitochondrial [Source:UniProtKB/Swiss-Prot;Acc:Q9FKS5]	-
AT5G09980	370.149	883.06	-1.25432	7.91514e-56	2.35162e-54	PEP4	5	580	Elicitor peptide 4 [Source:UniProtKB/Swiss-Prot;Acc:Q9FIA9]	-
AT1G62790	481.108	1035.95	-1.10474	8.24398e-56	2.44344e-54	-	1	944	At1g62790 [Source:UniProtKB/TrEMBL;Acc:Q6NLF7]	-
AT3G15640	1555.51	3685.93	-1.24381	1.02912e-55	3.03567e-54	COX5B-1	3	1187	Cytochrome c oxidase subunit 5b-1, mitochondrial [Source:UniProtKB/Swiss-Prot;Acc:Q9LW15]	-
AT1G44575	8670.79	23232.6	-1.42178	1.29938e-55	3.81918e-54	PSBS	1	1808	Photosystem II 22 kDa protein, chloroplastic [Source:UniProtKB/Swiss-Prot;Acc:Q9XF91]	-
AT5G58250	996.664	2178.63	-1.12872	1.58961e-55	4.65011e-54	-	5	1126	YCF54 [Source:UniProtKB/TrEMBL;Acc:Q9LVM3]	-
AT5G52320	172	551.463	-1.68021	2.25109e-55	6.55414e-54	CYP96A4	5	1987	CYP96A4 [Source:UniProtKB/TrEMBL;Acc:A0A178UE51]	p450
AT3G12345	681.136	1659.05	-1.28306	2.2897e-55	6.65872e-54	-	3	982	FKBP-type peptidyl-prolyl cis-trans isomerase [Source:UniProtKB/TrEMBL;Acc:Q9LHH3]	-
AT4G39880	914.393	1879.12	-1.03983	2.59012e-55	7.52353e-54	-	4	984	At4g39880 [Source:UniProtKB/TrEMBL;Acc:Q9SMR5]	-
AT1G24020	11507.3	63108.3	-2.45525	3.45828e-55	1.00217e-53	MLP423	1	1253	MLP-like protein 423 [Source:UniProtKB/Swiss-Prot;Acc:Q93VR4]	-
AT1G51630	1062.98	2165.71	-1.02699	3.87488e-55	1.12158e-53	MSR2	1	1828	Protein MANNAN SYNTHESIS-RELATED 2 [Source:UniProtKB/Swiss-Prot;Acc:Q0WPA5]	-
AT5G59500	553.526	1213.24	-1.13054	4.04374e-55	1.16909e-53	-	5	1871	Protein C-terminal S-isoprenylcysteine carboxyl O-methyltransferase [Source:UniProtKB/TrEMBL;Acc:Q9LTI0]	-
AT1G20010	1375.84	4981.12	-1.8559	5.65046e-55	1.6298e-53	TUBB5	1	2015	Tubulin beta-5 chain [Source:UniProtKB/Swiss-Prot;Acc:P29513]	Tubulin
AT3G01550	220.021	554.503	-1.3348	6.14629e-55	1.77075e-53	PPT2	3	1574	Phosphoenolpyruvate/phosphate translocator 2, chloroplastic [Source:UniProtKB/Swiss-Prot;Acc:Q8H0T6]	-
AT5G38430	1059.92	3250.22	-1.61603	1.48028e-54	4.22041e-53	RBCS-1B	5	1894	Ribulose bisphosphate carboxylase small chain 1B, chloroplastic [Source:UniProtKB/Swiss-Prot;Acc:P10796]	-
AT2G46390	931.969	2646.92	-1.50663	1.54558e-54	4.40152e-53	SDH8	2	522	Succinate dehydrogenase subunit 8, mitochondrial [Source:UniProtKB/Swiss-Prot;Acc:Q9SKE0]	-
AT1G01300	3706.89	8769.3	-1.24249	1.76578e-54	5.01705e-53	APF2	1	2062	Aspartyl protease family protein 2 [Source:UniProtKB/Swiss-Prot;Acc:Q9LNJ3]	-
AT1G29670	744.889	2031.39	-1.44591	1.8023e-54	5.10322e-53	-	1	1490	GDSL-like Lipase/Acylhydrolase superfamily protein [Source:TAIR;Acc:AT1G29670]	Lipase_GDSL
AT2G39020	877.96	1775.91	-1.01473	1.85794e-54	5.24872e-53	-	2	1356	Probable acetyltransferase NATA1-like [Source:UniProtKB/Swiss-Prot;Acc:Q9ZV06]	Acetyltransf_1
AT4G24220	1123.71	3210.95	-1.51374	1.88899e-54	5.33037e-53	VEP1	4	1722	3-oxo-Delta(4,5)-steroid 5-beta-reductase [Source:UniProtKB/Swiss-Prot;Acc:Q9STX2]	-
AT2G27960	532.799	1212.03	-1.1833	1.95952e-54	5.52309e-53	CKS1	2	857	Cyclin-dependent kinases regulatory subunit [Source:UniProtKB/TrEMBL;Acc:A0A178VPG9]	-
AT4G15480	359.585	868.552	-1.27106	2.45184e-54	6.87935e-53	UGT84A1	4	1716	UDP-glycosyltransferase 84A1 [Source:UniProtKB/Swiss-Prot;Acc:Q5XF20]	UDPGT
AT3G55420	531.41	1197.85	-1.17134	5.4935e-54	1.52749e-52	-	3	1219	Uncharacterized protein At3g55420 [Source:UniProtKB/TrEMBL;Acc:Q9M2T7]	-
AT1G72370	13223	50178.8	-1.92399	6.37387e-54	1.77029e-52	RPSAA	1	1289	40S ribosomal protein SA [Source:UniProtKB/TrEMBL;Acc:A0A178WNA1]	-
AT3G62720	698.788	1651	-1.23931	7.24296e-54	2.00491e-52	XXT1	3	1957	XXT1 [Source:UniProtKB/TrEMBL;Acc:A0A178VEJ0]	-
AT4G29290	10.9366	188.155	-4.10047	1.26861e-53	3.48817e-52	LCR26	4	335	Putative defensin-like protein 160 [Source:UniProtKB/Swiss-Prot;Acc:Q9M0F2]	-
AT1G79340	1451.14	3122.26	-1.10468	1.56757e-53	4.30063e-52	AMC4	1	1789	Metacaspase-4 [Source:UniProtKB/Swiss-Prot;Acc:O64517]	Peptidase_C14
AT5G08050	924.776	2945.29	-1.67028	1.93887e-53	5.31341e-52	-	5	925	Wiskott-aldrich syndrome family protein, putative (DUF1118) [Source:UniProtKB/TrEMBL;Acc:Q9SD79]	-
AT4G12530	95.1662	431.772	-2.18157	2.05709e-53	5.63115e-52	-	4	730	AIR1A-like protein [Source:UniProtKB/TrEMBL;Acc:Q9SU32]	-
AT3G62250	10608.7	35345.7	-1.73622	2.51634e-53	6.87309e-52	RPS27AC	3	992	Ubiquitin-40S ribosomal protein S27a-3 [Source:UniProtKB/Swiss-Prot;Acc:P59233]	ubiquitin
AT5G41700	2392.96	5434.12	-1.18271	2.95716e-53	8.05932e-52	UBC8	5	1441	ubiquitin conjugating enzyme 8 [Source:TAIR;Acc:AT5G41700]	UQ_con
AT2G34510	1133.81	2469.38	-1.12232	4.50365e-53	1.22336e-51	-	2	2994	Uncharacterized protein At2g34510 [Source:UniProtKB/TrEMBL;Acc:O64696]	-
AT3G13720	203.371	740.506	-1.86238	4.6112e-53	1.2512e-51	PRA1F3	3	1822	PRA1 family protein F3 [Source:UniProtKB/Swiss-Prot;Acc:Q9LIC6]	-
AT4G25760	55.5573	377.006	-2.7574	4.89515e-53	1.32679e-51	GDU2	4	928	Protein GLUTAMINE DUMPER 2 [Source:UniProtKB/Swiss-Prot;Acc:Q9SW07]	-
AT2G17560	1874.25	3965.16	-1.08104	5.0779e-53	1.37482e-51	HMGB4	2	1057	High mobility group B protein 4 [Source:UniProtKB/Swiss-Prot;Acc:Q42344]	HMG_box
ATCG01020	61.0222	510.641	-3.06331	9.13283e-53	2.46188e-51	RPL32	Pt	159	50S ribosomal protein L32, chloroplastic [Source:UniProtKB/Swiss-Prot;Acc:P61847]	-
AT3G52470	815.574	1690.55	-1.05131	2.73848e-52	7.32603e-51	-	3	1113	Late embryogenesis abundant (LEA) hydroxyproline-rich glycoprotein family [Source:UniProtKB/TrEMBL;Acc:Q9SVC8]	-
AT5G65360	4120.7	11601.4	-1.49325	3.25359e-52	8.68526e-51	HTR2	5	723	Histone H3 [Source:UniProtKB/TrEMBL;Acc:Q0WRA9]	Histone
AT3G12965	786.482	3146.03	-1.99931	4.1345e-52	1.10012e-50	-	3	374	other RNA [Source:TAIR;Acc:AT3G12965]	-
AT3G24050	1473.4	3069.01	-1.05836	4.2496e-52	1.12953e-50	GATA1	3	1410	GATA transcription factor 1 [Source:UniProtKB/Swiss-Prot;Acc:Q8LAU9]	GATA
AT1G35720	1074.12	8687.6	-3.01559	5.11598e-52	1.35689e-50	ANN1	1	1390	Annexin [Source:UniProtKB/TrEMBL;Acc:A0A178WGZ8]	-
AT3G56020	1436.93	6451.6	-2.16631	6.18837e-52	1.63605e-50	RPL41G	3	522	60S ribosomal protein L41 [Source:UniProtKB/Swiss-Prot;Acc:P62120]	-
AT3G12370	568.448	1579.18	-1.47348	7.37275e-52	1.94501e-50	-	3	1021	50S ribosomal protein L10 [Source:UniProtKB/TrEMBL;Acc:Q9LHH1]	-
AT4G38580	375.372	961.983	-1.35535	8.54732e-52	2.25007e-50	HIPP26	4	1149	HIPP26 [Source:UniProtKB/TrEMBL;Acc:A0A178V1F5]	HMA
AT5G40770	2359.24	6987.06	-1.56596	9.9837e-52	2.62539e-50	PHB3	5	2161	Prohibitin-3, mitochondrial [Source:UniProtKB/Swiss-Prot;Acc:O04331]	-
AT1G12845	199.119	745.792	-1.90403	1.0213e-51	2.67999e-50	-	1	776	At1g12845 [Source:UniProtKB/TrEMBL;Acc:Q0IGM1]	-
AT5G24980	99.4982	504.867	-2.34103	1.19338e-51	3.12492e-50	-	5	885	At5g24980 [Source:UniProtKB/TrEMBL;Acc:Q6NQ43]	-
AT5G19570	306.885	696.718	-1.18122	1.64e-51	4.27177e-50	-	5	758	Transmembrane protein [Source:UniProtKB/TrEMBL;Acc:Q94AU5]	-
AT2G21160	3483.28	9248.56	-1.4085	1.71599e-51	4.4603e-50	-	2	1219	Translocon-associated protein subunit alpha [Source:UniProtKB/Swiss-Prot;Acc:P45434]	-
AT3G22230	5299.7	23633.9	-2.1568	1.72359e-51	4.47536e-50	RPL27B	3	1062	60S ribosomal protein L27-2 [Source:UniProtKB/Swiss-Prot;Acc:Q8LCL3]	-
AT3G57560	727.702	1487.57	-1.03176	1.81361e-51	4.69924e-50	NAGK	3	1554	NAGK [Source:UniProtKB/TrEMBL;Acc:A0A178V7F4]	AA_kinase
AT2G16280	1118.14	2769.39	-1.30943	2.01593e-51	5.21254e-50	KCS9	2	2153	3-ketoacyl-CoA synthase 9 [Source:UniProtKB/Swiss-Prot;Acc:Q9SIX1]	-
AT1G27310	1678.97	5268.56	-1.6494	3.00353e-51	7.70969e-50	NTF2A	1	880	NTF2A [Source:UniProtKB/TrEMBL;Acc:A0A178WBG2]	-
AT2G45070	2608.63	6991	-1.42183	3.8084e-51	9.74533e-50	SEC61 BETA	2	869	Protein transport protein Sec61 subunit beta [Source:UniProtKB/Swiss-Prot;Acc:P38389]	-
AT1G67830	1051.78	2818.42	-1.42117	3.82943e-51	9.789e-50	FXG1	1	1394	Alpha-L-fucosidase 3 [Source:UniProtKB/Swiss-Prot;Acc:Q9FXE5]	Lipase_GDSL
AT2G26900	3295.42	8295.84	-1.33169	3.89578e-51	9.93806e-50	BASS2	2	1906	BASS2 [Source:UniProtKB/TrEMBL;Acc:A0A178VXV9]	-
AT1G26630	14450.8	44064.1	-1.60838	4.05082e-51	1.03229e-49	ELF5A-2	1	989	Eukaryotic translation initiation factor 5A-2 [Source:UniProtKB/Swiss-Prot;Acc:Q93VP3]	-
AT1G05430	519.688	1062.16	-1.03128	4.1929e-51	1.0674e-49	-	1	1176	Uncharacterized protein At1g05430 [Source:UniProtKB/TrEMBL;Acc:Q8LC42]	-
AT4G04830	237.896	847.208	-1.82854	5.44396e-51	1.37596e-49	MSRB5	4	761	Peptide methionine sulfoxide reductase B5 [Source:UniProtKB/Swiss-Prot;Acc:Q9ZS91]	-
AT1G35310	703.485	1715.99	-1.28533	6.35768e-51	1.60199e-49	MLP168	1	831	MLP-like protein 168 [Source:UniProtKB/Swiss-Prot;Acc:Q9C7I3]	-
AT3G44735	577.296	2090.06	-1.85508	6.8863e-51	1.73343e-49	PSK6	3	809	Putative phytosulfokines 6 [Source:UniProtKB/Swiss-Prot;Acc:Q8LA14]	-
AT4G38840	343.571	813.743	-1.2425	8.16702e-51	2.05372e-49	-	4	582	At4g38840 [Source:UniProtKB/TrEMBL;Acc:Q9T0J2]	Auxin_inducible
AT5G53880	1774.15	4437.28	-1.32295	8.35176e-51	2.09804e-49	-	5	754	Putative uncharacterized protein [Source:UniProtKB/TrEMBL;Acc:Q9FN38]	-
AT4G16230	63.0067	252.368	-1.9971	8.92481e-51	2.23972e-49	-	4	1390	GDSL-like Lipase/Acylhydrolase superfamily protein [Source:TAIR;Acc:AT4G16230]	Lipase_GDSL
AT3G08940	4674.32	16426	-1.81304	1.1146e-50	2.79431e-49	LHCB4.2	3	1367	Chlorophyll a-b binding protein CP29.2, chloroplastic [Source:UniProtKB/Swiss-Prot;Acc:Q9XF88]	-
AT3G11770	415.321	857.396	-1.04392	1.19793e-50	2.99713e-49	-	3	959	At3g11770 [Source:UniProtKB/TrEMBL;Acc:Q9SF21]	-
AT3G09035	692.891	1735.14	-1.32322	1.41155e-50	3.52447e-49	-	3	1571	Concanavalin A-like lectin family protein [Source:UniProtKB/TrEMBL;Acc:Q3EBA4]	-
AT1G77870	187.866	501.463	-1.41525	1.63472e-50	4.07756e-49	MUB5	1	1203	Membrane-anchored ubiquitin-fold protein 5 [Source:UniProtKB/Swiss-Prot;Acc:Q9SH14]	-
AT3G15020	693.737	1409.9	-1.02258	1.65887e-50	4.13363e-49	mMDH2	3	1738	Malate dehydrogenase 2, mitochondrial [Source:UniProtKB/Swiss-Prot;Acc:Q9LKA3]	-
AT1G01600	239.578	949.733	-1.98863	1.75642e-50	4.37229e-49	CYP86A4	1	2323	Cytochrome P450 86A4 [Source:UniProtKB/Swiss-Prot;Acc:Q9LMM1]	p450
AT2G32220	274.07	1059.26	-1.94937	2.52729e-50	6.25974e-49	RPL27A	2	614	60S ribosomal protein L27-1 [Source:UniProtKB/Swiss-Prot;Acc:Q9SKX8]	-
AT4G16190	1986.89	5263.52	-1.40486	2.69021e-50	6.6566e-49	RD19C	4	2144	Probable cysteine protease RD19C [Source:UniProtKB/Swiss-Prot;Acc:Q9SUL1]	Peptidase_C1
AT4G29240	500.52	1204.83	-1.26607	3.07832e-50	7.59411e-49	-	4	1795	Extensin-like protein [Source:UniProtKB/TrEMBL;Acc:Q9M0F7]	LRRNT_2
AT2G43090	2518.21	7869.33	-1.64356	5.37141e-50	1.31331e-48	-	2	1114	3-isopropylmalate dehydratase small subunit 3 [Source:UniProtKB/Swiss-Prot;Acc:Q9ZW85]	-
AT2G46540	719.078	2061.45	-1.51773	6.16487e-50	1.50583e-48	-	2	569	At2g46540/F11C10.23 [Source:UniProtKB/TrEMBL;Acc:Q9ZPY5]	-
AT4G33865	3236.48	10670.4	-1.72088	8.20898e-50	1.99526e-48	RPS29C	4	680	40S ribosomal protein S29 [Source:UniProtKB/Swiss-Prot;Acc:Q680P8]	-
AT4G29120	654.361	1593.24	-1.28222	8.3007e-50	2.01557e-48	-	4	1202	Probable 3-hydroxyisobutyrate dehydrogenase-like 1, mitochondrial [Source:UniProtKB/Swiss-Prot;Acc:Q9SZE1]	NAD_binding_2
AT1G35160	2587.12	5270.66	-1.02603	8.68357e-50	2.1044e-48	GF14 PHI	1	1447	GF14 protein phi chain [Source:UniProtKB/TrEMBL;Acc:F4HWQ5]	-
AT5G64400	3787.22	10812.4	-1.51325	8.9044e-50	2.15581e-48	-	5	2617	CONTAINS InterPro DOMAIN/s: CHCH (InterPro:IPR010625); BEST Arabidopsis thaliana protein match is: Cox19-like CHCH family protein (TAIR:AT5G09570.1); Ha. [Source:TAIR;Acc:AT5G64400]	-
AT5G23540	2493.93	7041.64	-1.4972	9.77524e-50	2.36433e-48	RPN11	5	1334	26S proteasome non-ATPase regulatory subunit 14 homolog [Source:UniProtKB/Swiss-Prot;Acc:Q9LT08]	Mov34
AT2G01250	8386.34	18402.9	-1.13369	1.17137e-49	2.82765e-48	RPL7B	2	1200	60S ribosomal protein L7-2 [Source:UniProtKB/Swiss-Prot;Acc:P60040]	-
AT1G55670	1172.92	3008.15	-1.35821	1.23232e-49	2.97187e-48	PSAG	1	780	Photosystem I reaction center subunit V, chloroplastic [Source:UniProtKB/Swiss-Prot;Acc:Q9S7N7]	-
AT5G44410	435.119	1036.54	-1.24977	1.33607e-49	3.21893e-48	-	5	1936	Berberine bridge enzyme-like 27 [Source:UniProtKB/Swiss-Prot;Acc:Q9FI25]	FAD_binding_4
AT1G73650	464.855	1447.56	-1.63723	1.41932e-49	3.41287e-48	-	1	1565	Protein of unknown function (DUF1295) [Source:TAIR;Acc:AT1G73650]	-
AT1G09590	6022.52	15173.5	-1.33295	1.47422e-49	3.54142e-48	RPL21A	1	872	60S ribosomal protein L21-1 [Source:UniProtKB/Swiss-Prot;Acc:Q43291]	-
AT3G06050	884.338	2091.75	-1.24048	1.50491e-49	3.61164e-48	PRXIIF	3	1226	PRXIIF [Source:UniProtKB/TrEMBL;Acc:A0A178VBA5]	-
AT5G58020	879	2381.89	-1.43729	1.94014e-49	4.64262e-48	-	5	1323	At5g58020 [Source:UniProtKB/TrEMBL;Acc:Q6NQ98]	DUF602
AT3G02730	585.019	1377.49	-1.23474	2.17189e-49	5.18215e-48	TRXF1	3	943	TRXF1 [Source:UniProtKB/TrEMBL;Acc:A0A178VBJ7]	-
AT2G15440	107.512	356.08	-1.73211	2.30795e-49	5.50147e-48	-	2	1308	At2g15440 [Source:UniProtKB/TrEMBL;Acc:Q9SJN8]	-
AT1G51355	99.899	358.35	-1.84203	2.33187e-49	5.55312e-48	SMR9	1	1018	Cyclin-dependent protein kinase inhibitor SMR9 [Source:UniProtKB/Swiss-Prot;Acc:Q3ECS5]	-
AT5G18290	210.962	531.441	-1.33091	2.4594e-49	5.8512e-48	SIP1-2	5	1295	Probable aquaporin SIP1-2 [Source:UniProtKB/Swiss-Prot;Acc:Q9FK43]	-
AT5G59120	1247.72	4905.72	-1.97558	2.59506e-49	6.16207e-48	SBT4.13	5	2487	Subtilisin-like protease SBT4.13 [Source:UniProtKB/Swiss-Prot;Acc:Q9FIG2]	Peptidase_S8
AT1G18600	474.391	1320.13	-1.47526	3.31909e-49	7.84364e-48	RBL12	1	1583	RBL12 [Source:UniProtKB/TrEMBL;Acc:A0A178WDJ5]	Rhomboid
AT1G29910	4697.11	39805	-3.08306	3.37659e-49	7.96429e-48	LHCB1.1	1	1223	Chlorophyll a-b binding protein 3, chloroplastic [Source:UniProtKB/Swiss-Prot;Acc:Q8VZ87]	-
AT3G24420	376.488	1228.66	-1.70598	3.85363e-49	9.06356e-48	-	3	1476	Alpha/beta-Hydrolases superfamily protein [Source:UniProtKB/TrEMBL;Acc:Q9LK01]	Abhydrolase_1
AT2G16630	622.606	1399.68	-1.17078	4.05732e-49	9.52448e-48	-	2	1520	At2g16630 [Source:UniProtKB/TrEMBL;Acc:Q8RWG5]	-
AT3G20820	3673.06	8575.02	-1.22329	4.66276e-49	1.09146e-47	-	3	1586	Leucine-rich repeat (LRR) family protein [Source:UniProtKB/TrEMBL;Acc:Q9LT39]	LRRNT_2
AT5G09510	3250.94	8945.38	-1.46002	5.18919e-49	1.21354e-47	RPS15D	5	1335	40S ribosomal protein S15-4 [Source:UniProtKB/Swiss-Prot;Acc:Q9FY64]	-
AT5G37600	1474.45	3962.48	-1.42556	5.30298e-49	1.23898e-47	GLN1-1	5	1588	Glutamine synthetase cytosolic isozyme 1-1 [Source:UniProtKB/Swiss-Prot;Acc:Q56WN1]	-
AT5G57735	76.6968	331.663	-2.10923	5.49512e-49	1.28266e-47	TASIR-ARF	5	496	tasiR-ARF; other RNA [Source:TAIR;Acc:AT5G57735]	-
AT5G07090	9992.5	32212.5	-1.68862	6.0003e-49	1.39926e-47	RPS4B	5	1400	40S ribosomal protein S4-2 [Source:UniProtKB/Swiss-Prot;Acc:P49204]	Ribosomal_S4e
AT4G29735	968.114	3193.96	-1.72131	6.12966e-49	1.42808e-47	-	4	855	unknown protein; FUNCTIONS IN: molecular_function unknown; INVOLVED IN: biological_process unknown; LOCATED IN: endomembrane system; EXPRESSED IN: 23 plant structures; EXPRESSED DURING: 15 growth stages; CONTAINS InterPro DOMAIN/s: Uncharacterised p /.../ family UPF0197 (InterPro:IPR007915); Ha. [Source:TAIR;Acc:AT4G29735]	-
AT1G67105	230.363	607.475	-1.39555	7.34179e-49	1.70726e-47	-	1	786	other RNA [Source:TAIR;Acc:AT1G67105]	-
AT5G64080	1524.33	3199.03	-1.06925	8.40586e-49	1.95103e-47	-	5	1022	Non-specific lipid-transfer protein-like protein At5g64080 [Source:UniProtKB/Swiss-Prot;Acc:Q8VYI9]	-
AT2G01520	94.2494	444.082	-2.23267	9.38419e-49	2.17198e-47	MLP328	2	895	MLP-like protein 328 [Source:UniProtKB/Swiss-Prot;Acc:Q9ZVF3]	-
AT1G64980	622.795	2146.35	-1.78407	9.73883e-49	2.25196e-47	-	1	1921	Nucleotide-diphospho-sugar transferases superfamily protein [Source:TAIR;Acc:AT1G64980]	-
AT2G36870	209.218	1078.8	-2.36449	1.27979e-48	2.94828e-47	XTH32	2	1916	Probable xyloglucan endotransglucosylase/hydrolase protein 32 [Source:UniProtKB/Swiss-Prot;Acc:Q9SJL9]	-
AT1G61570	943.623	1951.84	-1.04823	1.4695e-48	3.37903e-47	TIM13	1	761	Mitochondrial import inner membrane translocase subunit TIM13 [Source:UniProtKB/Swiss-Prot;Acc:Q9XH48]	-
AT1G79870	858.233	1741.9	-1.01929	1.68253e-48	3.85455e-47	HPR2	1	1287	Glyoxylate/hydroxypyruvate reductase A HPR2 [Source:UniProtKB/Swiss-Prot;Acc:Q9CA90]	2-Hacid_dh_C
AT1G51060	3416.82	8302.77	-1.2808	1.68598e-48	3.85885e-47	HTA10	1	839	Probable histone H2A.1 [Source:UniProtKB/Swiss-Prot;Acc:Q9C681]	Histone
AT4G23630	6338.27	15750.8	-1.31309	1.7972e-48	4.10963e-47	RTNLB1	4	2153	Reticulon-like protein [Source:UniProtKB/TrEMBL;Acc:A0A178V247]	-
AT1G04270	9016.06	36034.4	-1.99875	1.8713e-48	4.27511e-47	RPS15A	1	923	40S ribosomal protein S15-1 [Source:UniProtKB/Swiss-Prot;Acc:Q08112]	-
AT3G15680	1198.96	2955.76	-1.30092	1.8965e-48	4.32867e-47	-	3	1465	At3g15680 [Source:UniProtKB/TrEMBL;Acc:Q9LW11]	zf-RanBP
AT1G74020	307.303	1022.65	-1.73651	1.92805e-48	4.39662e-47	SSL12	1	1340	Protein STRICTOSIDINE SYNTHASE-LIKE 12 [Source:UniProtKB/Swiss-Prot;Acc:P94111]	Str_synth
AT4G35100	27146.2	67628.2	-1.31683	2.08892e-48	4.75908e-47	PIP2-7	4	1603	Aquaporin PIP2-7 [Source:UniProtKB/Swiss-Prot;Acc:P93004]	-
AT4G14440	1564.22	7610	-2.28218	2.19097e-48	4.98697e-47	ECI3	4	1345	Enoyl-CoA delta isomerase 3 [Source:UniProtKB/Swiss-Prot;Acc:O23300]	ECH
AT2G33800	2576.6	6377.76	-1.30708	3.61776e-48	8.18182e-47	RPS5	2	1309	30S ribosomal protein S5, chloroplastic [Source:UniProtKB/Swiss-Prot;Acc:P93014]	-
AT1G80080	533.54	1284.88	-1.26676	3.80537e-48	8.59827e-47	TMM	1	1831	TMM [Source:UniProtKB/TrEMBL;Acc:A0A178WJY8]	-
AT1G55210	2385.24	13688.9	-2.52068	3.81194e-48	8.60524e-47	DIR20	1	1035	Dirigent protein 20 [Source:UniProtKB/Swiss-Prot;Acc:Q9C891]	-
AT4G38460	808.472	2259.79	-1.48134	3.9912e-48	8.99347e-47	GGR	4	1339	Heterodimeric geranylgeranyl pyrophosphate synthase small subunit, chloroplastic [Source:UniProtKB/Swiss-Prot;Acc:Q39108]	-
AT5G59870	3392.4	8850.19	-1.38315	4.40987e-48	9.92783e-47	HTA6	5	780	Probable histone H2A.7 [Source:UniProtKB/Swiss-Prot;Acc:Q9FJE8]	Histone
AT4G02420	212.913	553.833	-1.37693	4.94576e-48	1.11241e-46	LECRK44	4	2458	L-type lectin-domain containing receptor kinase IV.4 [Source:UniProtKB/Swiss-Prot;Acc:O81291]	Pkinase
AT5G09750	241.749	738.577	-1.61081	5.89379e-48	1.32324e-46	HEC3	5	1006	Transcription factor HEC3 [Source:UniProtKB/Swiss-Prot;Acc:Q9LXD8]	HLH
AT1G03730	123.211	414.059	-1.75054	6.6837e-48	1.49786e-46	-	1	1271	At1g03730 [Source:UniProtKB/TrEMBL;Acc:Q1ECK0]	-
AT1G66130	356.321	721.096	-1.01623	6.80267e-48	1.52177e-46	-	1	1536	NAD(P)-binding Rossmann-fold superfamily protein [Source:UniProtKB/TrEMBL;Acc:Q9C8D3]	GFO_IDH_MocA
AT2G25490	3171.19	6806.53	-1.10221	6.97943e-48	1.5599e-46	EBF1	2	3052	EIN3-binding F-box protein 1 [Source:UniProtKB/Swiss-Prot;Acc:Q9SKK0]	-
AT3G45930	1274.4	4578.16	-1.84475	1.00992e-47	2.24902e-46	-	3	694	Histone H4 [Source:UniProtKB/TrEMBL;Acc:Q6NR90]	-
AT1G18210	1537.26	3945.42	-1.35904	1.13302e-47	2.5209e-46	CML27	1	1296	Probable calcium-binding protein CML27 [Source:UniProtKB/Swiss-Prot;Acc:Q9LE22]	-
AT1G10020	705.437	1711.41	-1.27737	1.36383e-47	3.0317e-46	-	1	2164	At1g10020 [Source:UniProtKB/TrEMBL;Acc:O80593]	-
AT1G27330	1234.53	3481.61	-1.49523	1.36733e-47	3.03676e-46	-	1	906	At1g27330 [Source:UniProtKB/TrEMBL;Acc:Q84K46]	-
AT1G04250	1071.64	2487.48	-1.21495	1.41897e-47	3.14578e-46	IAA17	1	1317	Auxin-responsive protein IAA17 [Source:UniProtKB/Swiss-Prot;Acc:P93830]	-
AT5G15210	1539.51	3714.24	-1.26967	1.44908e-47	3.20965e-46	ZHD8	5	1743	Zinc-finger homeodomain protein 8 [Source:UniProtKB/Swiss-Prot;Acc:Q9LXG0]	ZF-HD_dimer
AT1G56045	2499.58	8306.72	-1.73227	1.73434e-47	3.82779e-46	RPL41G	1	472	60S ribosomal protein L41 [Source:UniProtKB/Swiss-Prot;Acc:P62120]	-
AT5G04530	1259.84	2584.04	-1.03714	1.84241e-47	4.05947e-46	KCS19	5	2094	3-ketoacyl-CoA synthase 19 [Source:UniProtKB/Swiss-Prot;Acc:Q9LZ72]	-
AT5G65520	316.576	901.373	-1.50653	1.8426e-47	4.05947e-46	-	5	876	Tetratricopeptide repeat (TPR)-like superfamily protein [Source:UniProtKB/TrEMBL;Acc:Q9LSM3]	-
AT2G24200	4954.4	11178.7	-1.17377	1.87552e-47	4.1283e-46	LAP1	2	2009	Leucine aminopeptidase 1 [Source:UniProtKB/Swiss-Prot;Acc:P30184]	-
AT2G02850	4465.96	13048.8	-1.54662	2.28016e-47	5.00561e-46	ARPN	2	995	Basic blue protein [Source:UniProtKB/Swiss-Prot;Acc:Q8LG89]	Cu_bind_like
AT3G09200	14660.4	56075.1	-1.93539	2.38447e-47	5.22997e-46	RPP0B	3	1460	60S acidic ribosomal protein P0-2 [Source:UniProtKB/Swiss-Prot;Acc:Q42112]	-
AT2G40890	521.65	1307.53	-1.32328	2.45461e-47	5.37904e-46	CYP98A3	2	1885	Cytochrome P450 98A3 [Source:UniProtKB/Swiss-Prot;Acc:O22203]	p450
AT5G12190	461.424	1537	-1.73445	2.59883e-47	5.69004e-46	-	5	956	Splicing factor 3B subunit 6-like protein [Source:UniProtKB/Swiss-Prot;Acc:Q9FMP4]	RRM_1
AT4G05440	391.002	920.281	-1.2326	2.60777e-47	5.70456e-46	EDA35	4	1423	Cell division cycle protein 123 homolog [Source:UniProtKB/TrEMBL;Acc:Q9M0V1]	-
AT2G31670	1056.2	2338.3	-1.14681	2.93482e-47	6.39733e-46	UP3	2	1311	Stress-response A/B barrel domain-containing protein UP3 [Source:UniProtKB/Swiss-Prot;Acc:Q9SIP1]	-
AT3G25600	129.074	390.469	-1.59805	2.97147e-47	6.47152e-46	CML16	3	1192	Probable calcium-binding protein CML16 [Source:UniProtKB/Swiss-Prot;Acc:Q9LI84]	-
AT4G02080	1481.1	4361.04	-1.55754	3.70157e-47	8.03328e-46	SAR1A	4	901	SAR2 [Source:UniProtKB/TrEMBL;Acc:A0A178V5S8]	Arf
AT4G13930	3770.37	8895.26	-1.238	4.51932e-47	9.79079e-46	SHM4	4	1873	Serine hydroxymethyltransferase 4 [Source:UniProtKB/Swiss-Prot;Acc:O23254]	SHMT
AT1G72020	1993.6	8264.21	-2.05122	5.20532e-47	1.12671e-45	-	1	790	TonB-dependent heme receptor A [Source:UniProtKB/TrEMBL;Acc:Q9C7G5]	-
AT3G51010	919.962	2294.67	-1.31804	5.4887e-47	1.18597e-45	-	3	955	At3g51010 [Source:UniProtKB/TrEMBL;Acc:Q9SD44]	-
AT1G66410	3082.26	9639.68	-1.64469	6.03143e-47	1.30097e-45	CAM4	1	1872	Calmodulin 4 [Source:UniProtKB/TrEMBL;Acc:F4IEU4]	-
AT3G53430	6383.2	24446.1	-1.93717	6.75604e-47	1.45599e-45	RPL12B	3	1208	60S ribosomal Protein L12-like [Source:UniProtKB/TrEMBL;Acc:Q0WW72]	-
AT2G25510	44.8478	218.775	-2.28746	7.2259e-47	1.5559e-45	-	2	760	Expressed protein [Source:UniProtKB/TrEMBL;Acc:Q8S8H2]	-
AT3G44150	599.216	1408.14	-1.23104	7.7928e-47	1.6765e-45	-	3	1019	Expp1 protein [Source:UniProtKB/TrEMBL;Acc:Q8VZ18]	-
AT5G41685	505.436	1509.71	-1.57762	9.01764e-47	1.93496e-45	TOM7-1	5	575	Mitochondrial import receptor subunit TOM7-1 [Source:UniProtKB/Swiss-Prot;Acc:Q9ASY8]	-
AT2G28950	8071.62	18808.9	-1.22031	1.21127e-46	2.58784e-45	EXPA6	2	1590	Expansin [Source:UniProtKB/TrEMBL;Acc:A0A178VZL6]	-
AT5G60960	1609.6	3771.25	-1.22795	1.30899e-46	2.7942e-45	PNM1	5	1944	PNM1 [Source:UniProtKB/TrEMBL;Acc:A0A178U8V9]	-
AT5G15050	384.949	871.923	-1.1824	1.3489e-46	2.87691e-45	GLCAT14B	5	1823	Beta-glucuronosyltransferase GlcAT14B [Source:UniProtKB/Swiss-Prot;Acc:Q9LFQ0]	-
AT1G31830	902.943	2044.92	-1.17761	1.43215e-46	3.04922e-45	-	1	2113	Probable polyamine transporter At1g31830 [Source:UniProtKB/Swiss-Prot;Acc:Q9C6S5]	-
AT2G40240	128.036	359.669	-1.49331	3.0594e-46	6.43619e-45	-	2	1614	Pentatricopeptide repeat-containing protein At2g40240, mitochondrial [Source:UniProtKB/Swiss-Prot;Acc:Q9S733]	-
AT3G57610	1698.9	3427.95	-1.01172	3.41536e-46	7.17894e-45	PURA	3	1918	Adenylosuccinate synthetase, chloroplastic [Source:UniProtKB/Swiss-Prot;Acc:Q96529]	-
AT2G44940	139.632	476.856	-1.7671	3.56872e-46	7.49492e-45	ERF034	2	1303	Ethylene-responsive transcription factor ERF034 [Source:UniProtKB/Swiss-Prot;Acc:Q8LBQ7]	AP2
AT1G29070	1561.03	4262.4	-1.44858	3.84561e-46	8.06958e-45	RPL34	1	819	50S ribosomal protein L34, chloroplastic [Source:UniProtKB/Swiss-Prot;Acc:Q9LP37]	-
AT3G26960	133.518	410.942	-1.61971	4.79753e-46	1.00415e-44	-	3	1320	Pollen Ole e 1 allergen and extensin family protein [Source:UniProtKB/TrEMBL;Acc:F4JEV5]	-
AT2G19720	269.856	955.973	-1.82324	5.45496e-46	1.13886e-44	RPS15AB	2	730	40S ribosomal protein S15a-2 [Source:UniProtKB/Swiss-Prot;Acc:O82205]	-
AT3G22110	2032.11	7608.71	-1.90442	5.95567e-46	1.24025e-44	PAC1	3	1225	Proteasome subunit alpha type-4-A [Source:UniProtKB/Swiss-Prot;Acc:O81148]	Proteasome
AT1G66725	193.317	468.987	-1.27487	5.98679e-46	1.24569e-44	MIR163	1	331	MIR163; miRNA [Source:TAIR;Acc:AT1G66725]	-
AT5G03850	3606.07	12966.6	-1.84614	6.97306e-46	1.44968e-44	RPS28A	5	930	40S ribosomal protein S28-1 [Source:UniProtKB/Swiss-Prot;Acc:Q9SR73]	-
AT4G28310	470.319	1502.57	-1.67481	7.2597e-46	1.508e-44	-	4	870	At4g28310 [Source:UniProtKB/TrEMBL;Acc:Q8LDV4]	-
AT4G29720	659.207	1615.91	-1.29286	7.69027e-46	1.5961e-44	PAO5	4	2066	Probable polyamine oxidase 5 [Source:UniProtKB/Swiss-Prot;Acc:Q9SU79]	Amino_oxidase
AT4G38400	193.422	710.385	-1.87527	9.43513e-46	1.95169e-44	EXLA2	4	1126	Expansin-like A2 [Source:UniProtKB/Swiss-Prot;Acc:Q9SVE5]	-
AT3G17020	1526.35	4292.65	-1.49139	1.11054e-45	2.29143e-44	-	3	1308	AT3g17020/K14A17_14 [Source:UniProtKB/TrEMBL;Acc:Q9LSP5]	Usp
AT4G13950	260.428	663.193	-1.34679	1.11802e-45	2.3026e-44	RALFL31	4	752	Protein RALF-like 31 [Source:UniProtKB/Swiss-Prot;Acc:Q2HIM9]	-
AT5G10420	50.2049	212.146	-2.07294	1.11862e-45	2.3026e-44	DTX26	5	1700	Protein DETOXIFICATION [Source:UniProtKB/TrEMBL;Acc:A0A178UJR7]	MatE
AT5G11280	670.224	1730.94	-1.36746	1.22335e-45	2.5158e-44	-	5	1075	Tail fiber [Source:UniProtKB/TrEMBL;Acc:Q94AQ7]	-
AT3G13120	1801.84	4253.99	-1.23863	1.40259e-45	2.88202e-44	RPS10	3	1544	30S ribosomal protein S10, chloroplastic [Source:UniProtKB/Swiss-Prot;Acc:Q9LK61]	Ribosomal_S10
AT1G80600	1295.51	3361.81	-1.37485	1.49275e-45	3.06473e-44	WIN1	1	1732	Acetylornithine aminotransferase, chloroplastic/mitochondrial [Source:UniProtKB/Swiss-Prot;Acc:Q9M8M7]	Aminotran_3
AT2G09990	2638.8	9588.18	-1.8612	1.6374e-45	3.35613e-44	RPS16A	2	1008	40S ribosomal protein S16-1 [Source:UniProtKB/Swiss-Prot;Acc:Q9SK22]	-
AT3G04840	9224.31	28340.3	-1.61925	1.73747e-45	3.55829e-44	RPS3AA	3	1193	40S ribosomal protein S3a-1 [Source:UniProtKB/Swiss-Prot;Acc:Q9CAV0]	-
AT1G27970	1122.07	2995.58	-1.41586	2.1667e-45	4.42268e-44	NTF2B	1	1161	Nuclear transport factor 2B [Source:UniProtKB/TrEMBL;Acc:A8MS55]	-
AT2G47610	8716.7	19016.9	-1.12527	2.18443e-45	4.4552e-44	RPL7AA	2	1161	60S ribosomal protein L7a-1 [Source:UniProtKB/Swiss-Prot;Acc:P49692]	-
AT4G32770	444.388	947.606	-1.08966	2.64727e-45	5.38583e-44	VTE1	4	1958	Tocopherol cyclase, chloroplastic [Source:UniProtKB/Swiss-Prot;Acc:Q94FY7]	-
AT3G10610	1493.38	4125.85	-1.46543	2.71377e-45	5.51658e-44	RPS17C	3	870	40S ribosomal protein S17-3 [Source:UniProtKB/Swiss-Prot;Acc:Q9SQZ1]	-
AT5G39320	1440.84	3791.09	-1.39496	3.31421e-45	6.72058e-44	UGD4	5	2014	UDP-glucose 6-dehydrogenase 4 [Source:UniProtKB/Swiss-Prot;Acc:Q9FM01]	-
AT1G12020	155.233	567.021	-1.86705	3.506e-45	7.09785e-44	-	1	2187	F12F1.11 [Source:UniProtKB/TrEMBL;Acc:O65377]	-
AT5G18030	59.8599	370.309	-2.6237	3.82802e-45	7.72448e-44	SAUR21	5	839	Auxin-responsive protein SAUR21 [Source:UniProtKB/Swiss-Prot;Acc:Q9FJF9]	-
AT5G23070	354.364	800.773	-1.17491	3.9962e-45	8.05727e-44	TK1B	5	1187	Thymidine kinase [Source:UniProtKB/TrEMBL;Acc:A0A178UCI4]	TK
AT5G02502	286.029	1512.26	-2.40137	4.00199e-45	8.06236e-44	OST4B	5	521	Dolichyl-diphosphooligosaccharide--protein glycosyltransferase subunit 4B [Source:UniProtKB/Swiss-Prot;Acc:Q8L986]	-
AT2G47450	1936.74	4912.94	-1.34226	4.18569e-45	8.41187e-44	CAO	2	1815	Signal recognition particle 43 kDa protein, chloroplastic [Source:UniProtKB/Swiss-Prot;Acc:O22265]	Chromo
AT1G47200	1344.12	3479.31	-1.37165	5.10143e-45	1.02273e-43	WPP2	1	999	WPP domain-containing protein 2 [Source:UniProtKB/Swiss-Prot;Acc:Q9C500]	-
AT4G03280	3060.48	7236.24	-1.24109	5.39429e-45	1.07969e-43	PETC	4	1095	Cytochrome b6-f complex iron-sulfur subunit, chloroplastic [Source:UniProtKB/Swiss-Prot;Acc:Q9ZR03]	-
AT1G14345	638.788	1512.71	-1.24197	6.05841e-45	1.20967e-43	-	1	1010	NAD(P)-linked oxidoreductase superfamily protein [Source:UniProtKB/TrEMBL;Acc:Q949S6]	-
AT5G16130	6980.17	14711.4	-1.0754	9.98658e-45	1.98121e-43	RPS7C	5	989	40S ribosomal protein S7-3 [Source:UniProtKB/Swiss-Prot;Acc:Q8LD03]	-
AT3G16150	365.244	1067.79	-1.54541	1.02528e-44	2.02914e-43	-	3	1364	ASPGB1 [Source:UniProtKB/TrEMBL;Acc:A0A384KV24]	Asparaginase_2
AT2G14880	1043.07	2432.13	-1.22058	1.99005e-44	3.92594e-43	-	2	1142	Expressed protein [Source:UniProtKB/TrEMBL;Acc:O82326]	-
AT2G05220	4776.2	13040.9	-1.44894	2.1443e-44	4.22687e-43	RPS17B	2	963	40S ribosomal protein S17-2 [Source:UniProtKB/Swiss-Prot;Acc:Q9SJ36]	-
AT2G42885	495.076	2474.22	-2.32126	2.21434e-44	4.36146e-43	-	2	662	Defensin-like protein 54 [Source:UniProtKB/Swiss-Prot;Acc:Q8GY39]	-
AT2G34460	328.516	777.574	-1.24058	3.24033e-44	6.34186e-43	-	2	1146	Uncharacterized protein At2g34460, chloroplastic [Source:UniProtKB/Swiss-Prot;Acc:Q8H124]	-
AT1G07370	695.177	2130.73	-1.61509	3.47673e-44	6.79914e-43	PCNA	1	1130	Proliferating cellular nuclear antigen 1 [Source:UniProtKB/Swiss-Prot;Acc:Q9M7Q7]	PCNA_C
AT3G61640	867.617	1813.29	-1.06138	3.746e-44	7.31417e-43	AGP20	3	862	Arabinogalactan protein 20 [Source:UniProtKB/Swiss-Prot;Acc:Q9M373]	-
AT5G05270	1294.59	9958.72	-2.9433	3.91847e-44	7.64489e-43	CHI3	5	1384	Probable chalcone--flavonone isomerase 3 [Source:UniProtKB/Swiss-Prot;Acc:Q8VZW3]	-
AT1G11680	2126.1	4363.41	-1.03771	4.17854e-44	8.14584e-43	CYP51G1	1	2028	Sterol 14-demethylase [Source:UniProtKB/Swiss-Prot;Acc:Q9SAA9]	p450
[truncated: 2,798 more rows]

## Sheet: UP phyB hAT vs nAT
gene_id	phybHT	phybNC	log2FoldChange	pvalue	padj	gene_name	gene_chr	gene_length	gene_description	tf_family
[truncated: 1,037 more rows]

[truncated: 7 more sheets: DOWN phyB hAT vs nAT, UP PIF4ox hAT vs nAT, DOWN PIF4ox hAT vs nAT, UP phyb nAT vs Col-0 hAT, DOWN phyb nAT vs Col-0 hAT, UP PIF4ox nAT vs Col-0 hAT, DOWN PIF0x nAT vs Col-0 hAT]
